# Supplementary material for: International Clones of High Risk of Acinetobacter Baumannii—Definitions, History, Properties and Perspectives
Source: MDPI journal article supplement (doi:10.3390/microorganisms11082115), 2023-08-19
Supplement: s1 [file s1]

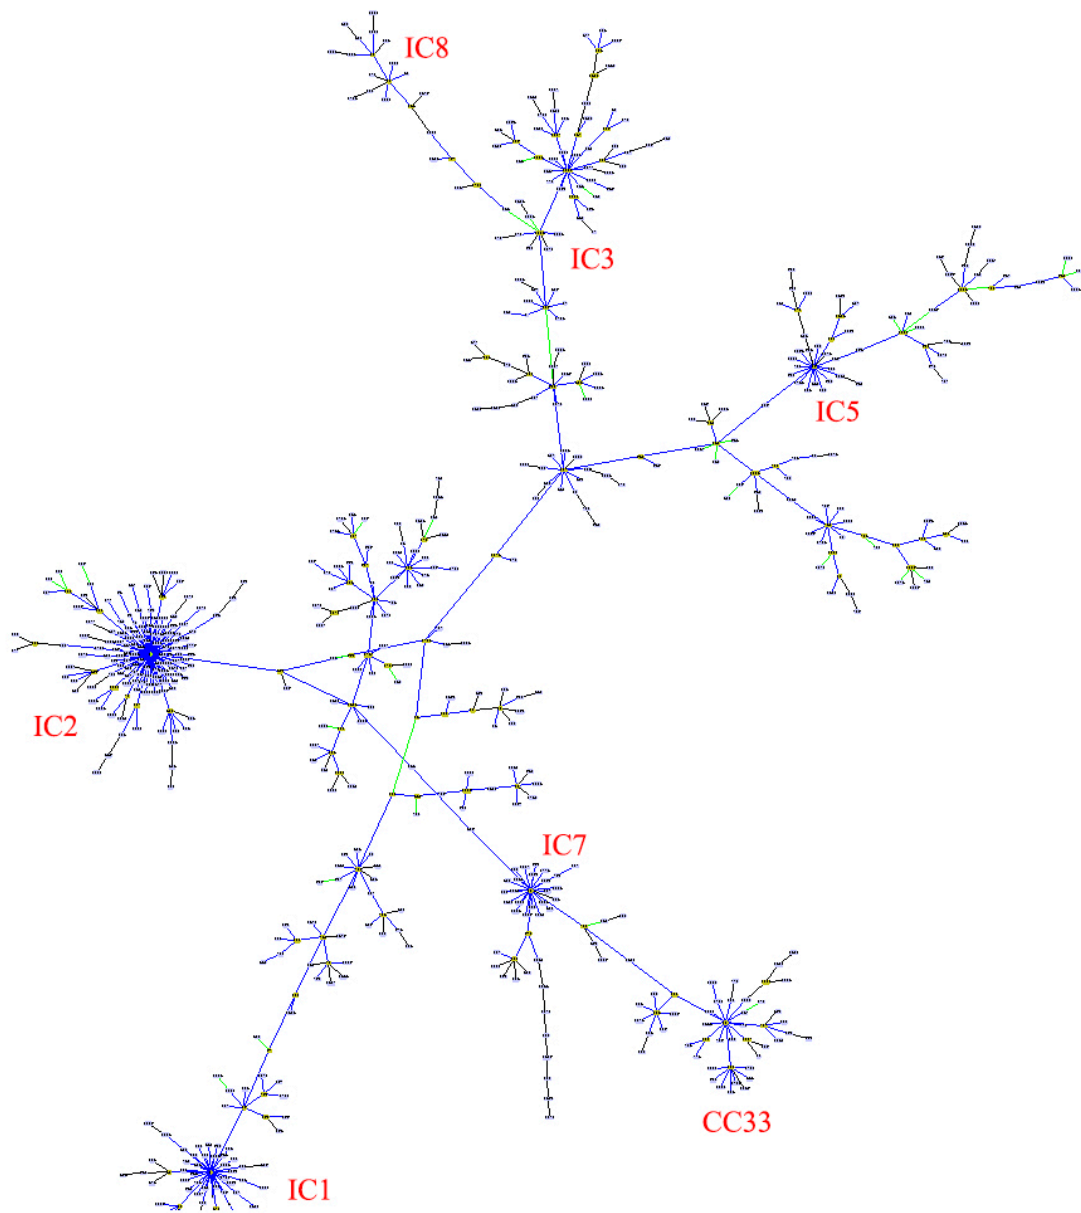

**Figure S1.** Complete eBURST results for grouping Pasteur STs of *A. baumannii*.

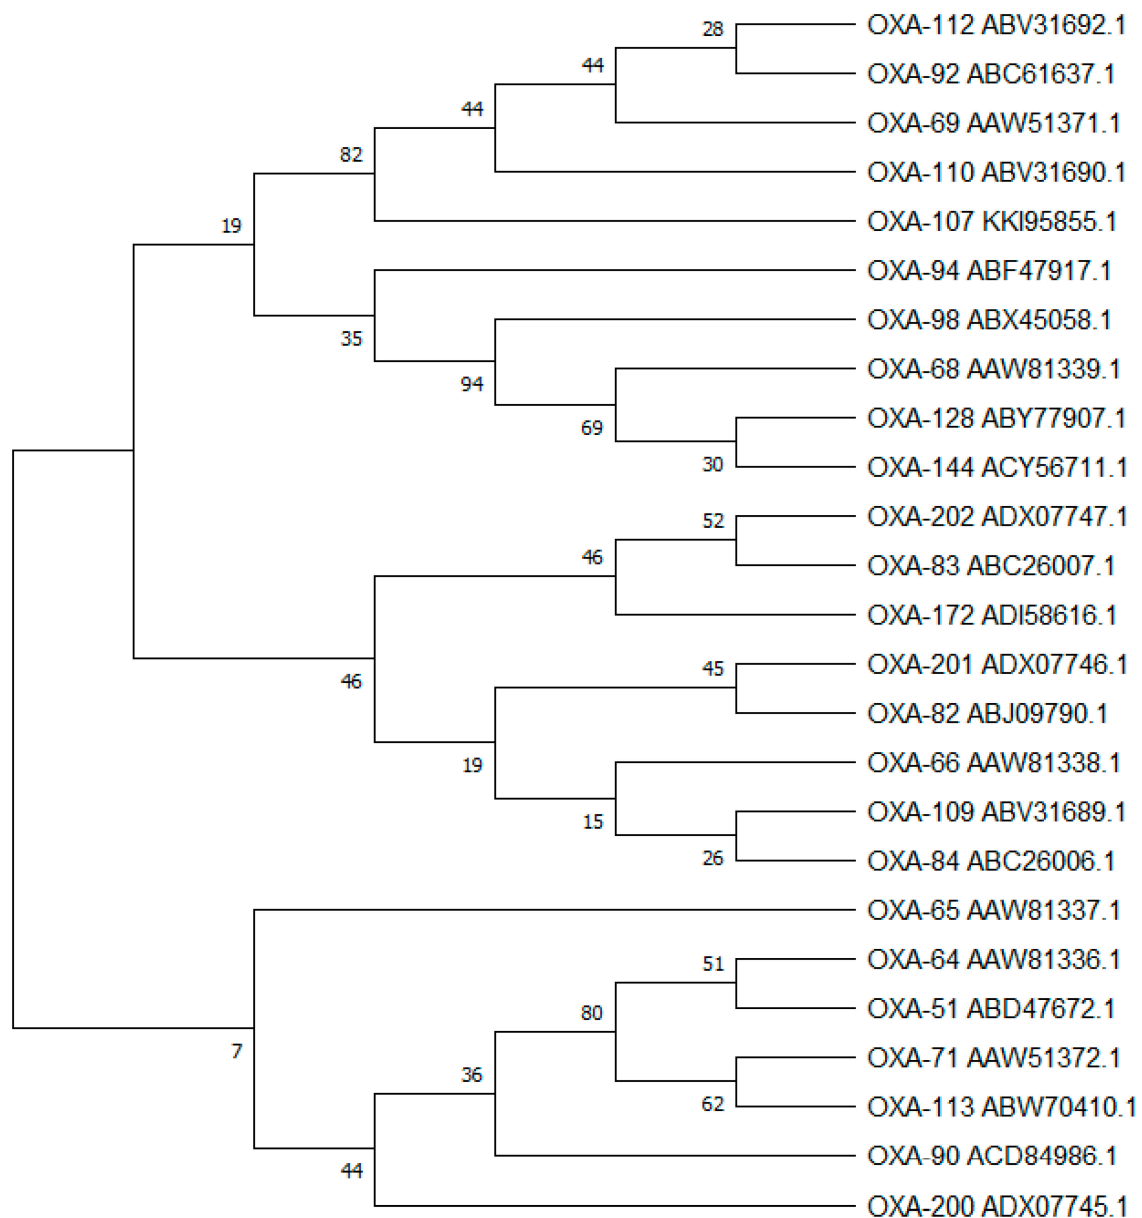

**Figure S2.** Maximum likelihood tree for amino acid sequences of OXA-51 variants corresponding to IC1-IC9.
