# Supplementary material for: International Clones of High Risk of Acinetobacter Baumannii—Definitions, History, Properties and Perspectives
Source: Microorganisms. 2023 Aug 19;11(8):2115. doi: 10.3390/microorganisms11082115 (PMC10459012; doi:10.3390/microorganisms11082115)
Supplement: Supplementary file 1 [file microorganisms-11-02115-s001.zip]

Archive with 4 entries (4 files):
- figures S1 and S2.pdf
- tableS1.xlsx
- tableS2.txt
- tableS3.xlsx
