# Supplementary material for: International Clones of High Risk of Acinetobacter Baumannii—Definitions, History, Properties and Perspectives
Source: Microorganisms. 2023 Aug 19;11(8):2115. doi: 10.3390/microorganisms11082115 (PMC10459012; doi:10.3390/microorganisms11082115)
Supplement: Supplementary file 1 [file microorganisms-11-02115-s001.zip › tableS1.xlsx]

## Sheet: TableS1
Table S1: MLST and OXA-51-like typing of Genbank A. baumannii isolates including IC assignment
Assembly name	MLST Pasteur ST	OXA-51-like variant	IC
GCA_000015425.1_ASM1542v1	437	OXA-259	NOIC
GCA_000018445.1_ASM1844v1	2	NOT_FOUND	IC2
GCA_000021245.2_ASM2124v2	1	NOT_FOUND	IC1
GCA_000069205.1_ASM6920v1	17	OXA-75	NOIC
GCA_000069245.1_ASM6924v1	1	NOT_FOUND	IC1
GCA_000162295.1_ASM16229v1	52	NOT_FOUND	NOIC
GCA_000163355.2_ASM16335v2	81	NOT_FOUND	IC1
GCA_000163375.2_ASM16337v2	81	NOT_FOUND	IC1
GCA_000163395.2_ASM16339v2	2	NOT_FOUND	IC2
GCA_000173395.1_ASM17339v1	49	NOT_FOUND	NOIC
GCA_000177695.1_ASM17769v1	1	NOT_FOUND	IC1
GCA_000177715.1_ASM17771v1	20	NOT_FOUND	IC1
GCA_000177735.1_ASM17773v1	1	NOT_FOUND	IC1
GCA_000184475.2_ASM18447v2	2	OXA-115	IC2
GCA_000184495.2_ASM18449v2	16	OXA-402	NOIC
GCA_000184515.2_ASM18451v2	25	OXA-64	IC7
GCA_000186565.1_ASM18656v1	404	OXA-715	NOIC
GCA_000186645.2_ASM18664v2	2	NOT_FOUND	IC2
GCA_000186665.4_ASM18666v4	267	OXA-180	NOIC
GCA_000187205.4_ASM18720v4	2	OXA-66	IC2
GCA_000188215.1_ASM18821v1	2	NOT_FOUND	IC2
GCA_000189655.2_ASM18965v2	2	OXA-66	IC2
GCA_000189675.2_ASM18967v2	2	OXA-66	IC2
GCA_000189695.2_ASM18969v2	78	OXA-90	IC6
GCA_000189715.2_ASM18971v2	25	OXA-64	IC7
GCA_000189735.2_ASM18973v2	2	OXA-66	IC2
GCA_000214965.2_gacin09v1.0	25	OXA-64	IC7
GCA_000214985.2_gacin10v1.0	3	OXA-71	IC3
GCA_000215005.2_AcbauOIFC032v1.0	32	OXA-100	NOIC
GCA_000222225.2_ASM22222v2	ND	OXA-115	NOIC		'ND' means ST could not be determined
GCA_000222245.2_ASM22224v2	2	OXA-66	IC2
GCA_000222265.2_ASM22226v2	415	OXA-115	NOIC
GCA_000222285.2_ASM22228v2	2	OXA-115	IC2
GCA_000226275.2_ASM22627v2	2	NOT_FOUND	IC2
GCA_000241665.2_ASM24166v2	3	OXA-312	IC3
GCA_000241685.2_ASM24168v2	1	OXA-69	IC1
GCA_000241705.2_ASM24170v2	25	OXA-64	IC7
GCA_000241725.2_ASM24172v2	2	OXA-66	IC2
GCA_000248195.2_ASM24819v2	69	OXA-302	NOIC
GCA_000248255.2_ASM24825v2	2	NOT_FOUND	IC2
GCA_000248275.2_ASM24827v2	2	OXA-66	IC2
GCA_000278605.1_gacin08v1.0	2	NOT_FOUND	IC2
GCA_000278625.1_AcbauOIFC137v1.0	3	NOT_FOUND	IC3
GCA_000278645.1_AcbauOIFC109v1.0	3	NOT_FOUND	IC3
GCA_000278665.1_AcbauOIFC143v1.0	25	NOT_FOUND	IC7
GCA_000278685.1_AcbauOIFC189v1.0	2	NOT_FOUND	IC2
GCA_000282795.3_ASM28279v3	2	OXA-66	IC2
GCA_000286535.1_gacin11v1.0	3	NOT_FOUND	IC3
GCA_000286615.1_gacin07v1.0	1	NOT_FOUND	IC1
GCA_000292545.1_ASM29254v1	218	NOT_FOUND	NOIC
GCA_000297515.1_gacin24v1.0	414	NOT_FOUND	IC2
GCA_000297535.1_gacin24v1.0	136	NOT_FOUND	NOIC
GCA_000297575.1_gacin25v1.0	513	NOT_FOUND	NOIC
GCA_000297595.1_gacin26v1.0	1	NOT_FOUND	IC1
GCA_000297915.1_Acin_baum_Ab11111_V1	2	NOT_FOUND	IC2
GCA_000297935.1_Acin_baum_Ab33333_V1	419	NOT_FOUND	NOIC
GCA_000297955.1_Acin_baum_Ab44444_V1	2	NOT_FOUND	IC2
GCA_000299655.1_ASM29965v1	2	NOT_FOUND	IC2
GCA_000299675.1_ASM29967v1	2	NOT_FOUND	IC2
GCA_000301175.1_ASM30117v1	2	NOT_FOUND	IC2
GCA_000301195.1_ASM30119v1	417	NOT_FOUND	NOIC
GCA_000301215.1_ASM30121v1	2	NOT_FOUND	IC2
GCA_000301235.1_ASM30123v1	113	NOT_FOUND	IC7
GCA_000301255.1_ASM30125v1	113	NOT_FOUND	IC7
GCA_000301275.1_ASM30127v1	2	NOT_FOUND	IC2
GCA_000301295.1_ASM30129v1	241	NOT_FOUND	NOIC
GCA_000301315.1_ASM30131v1	415	NOT_FOUND	NOIC
GCA_000301335.1_ASM30133v1	25	NOT_FOUND	IC7
GCA_000301355.1_ASM30135v1	416	NOT_FOUND	NOIC
GCA_000301375.1_ASM30137v1	2	NOT_FOUND	IC2
GCA_000301395.1_ASM30139v1	2	NOT_FOUND	IC2
GCA_000301415.1_ASM30141v1	417	NOT_FOUND	NOIC
GCA_000301435.1_ASM30143v1	1	NOT_FOUND	IC1
GCA_000301455.1_ASM30145v1	2	NOT_FOUND	IC2
GCA_000301475.1_ASM30147v1	2	NOT_FOUND	IC2
GCA_000301495.1_ASM30149v1	2	NOT_FOUND	IC2
GCA_000301515.1_ASM30151v1	406	NOT_FOUND	NOIC
GCA_000301535.1_ASM30153v1	406	NOT_FOUND	NOIC
GCA_000301555.1_ASM30155v1	406	NOT_FOUND	NOIC
GCA_000301575.1_ASM30157v1	2	NOT_FOUND	IC2
GCA_000301595.1_ASM30159v1	2	NOT_FOUND	IC2
GCA_000301615.1_ASM30161v1	2	NOT_FOUND	IC2
GCA_000301655.1_ASM30165v1	2	NOT_FOUND	IC2
GCA_000301835.1_ASM30183v1	413	NOT_FOUND	NOIC
GCA_000301855.1_ASM30185v1	422	NOT_FOUND	IC5
GCA_000301875.1_ASM30187v1	429	NOT_FOUND	NOIC
GCA_000301895.1_ASM30189v1	241	NOT_FOUND	NOIC
GCA_000301915.1_ASM30191v1	2	NOT_FOUND	IC2
GCA_000301935.1_ASM30193v1	416	NOT_FOUND	NOIC
GCA_000301955.1_ASM30195v1	415	NOT_FOUND	NOIC
GCA_000301975.1_ASM30197v1	417	NOT_FOUND	NOIC
GCA_000301995.1_ASM30199v1	417	NOT_FOUND	NOIC
GCA_000302015.1_ASM30201v1	2	NOT_FOUND	IC2
GCA_000302035.1_ASM30203v1	1	NOT_FOUND	IC1
GCA_000302055.1_ASM30205v1	2	NOT_FOUND	IC2
GCA_000302075.1_ASM30207v1	2	NOT_FOUND	IC2
GCA_000302095.1_ASM30209v1	2	NOT_FOUND	IC2
GCA_000302135.1_ASM30213v1	438	NOT_FOUND	NOIC
GCA_000302155.1_ASM30215v1	417	NOT_FOUND	NOIC
GCA_000302175.1_ASM30217v1	406	NOT_FOUND	NOIC
GCA_000302195.1_ASM30219v1	2	NOT_FOUND	IC2
GCA_000302215.1_ASM30221v1	2	NOT_FOUND	IC2
GCA_000302235.1_ASM30223v1	241	NOT_FOUND	NOIC
GCA_000302255.1_ASM30225v1	422	NOT_FOUND	IC5
GCA_000302275.1_ASM30227v1	1	NOT_FOUND	IC1
GCA_000302575.1_ASM30257v1	2	NOT_FOUND	IC2
GCA_000304655.1_gacin18v1.0	1	NOT_FOUND	IC1
GCA_000304675.1_GACIN20v1.0	405	NOT_FOUND	NOIC
GCA_000304695.1_gacin17v1.0	1	NOT_FOUND	IC1
GCA_000305215.1_gacin13v1.0	19	NOT_FOUND	IC1
GCA_000305235.1_gacin14v1.0	10	NOT_FOUND	IC8
GCA_000305255.1_gacin15v1.0	2	NOT_FOUND	IC2
GCA_000305275.1_gacin22v1.0	515	NOT_FOUND	NOIC
GCA_000305295.1_gacin16v1.0	3	NOT_FOUND	IC3
GCA_000305315.1_gacin21v1.0	20	NOT_FOUND	IC1
GCA_000307895.1_gacin19v1.0	412	NOT_FOUND	NOIC
GCA_000307975.2_ASM30797v2	2	OXA-66	IC2
GCA_000308995.1_ASM30899v1	2	NOT_FOUND	IC2
GCA_000309095.1_gacin42v1.0	32	NOT_FOUND	NOIC
GCA_000309115.1_gacin45v1.0	136	NOT_FOUND	NOIC
GCA_000309135.1_gacin43v1.0	32	NOT_FOUND	NOIC
GCA_000309155.1_gacin48v1.0	49	NOT_FOUND	NOIC
GCA_000309175.1_gacin34v1.0	2	NOT_FOUND	IC2
GCA_000309195.1_gacin35v1.0	19	NOT_FOUND	IC1
GCA_000309215.1_gacin37v1.0	3	NOT_FOUND	IC3
GCA_000309235.1_gacin38v1.0	403	NOT_FOUND	NOIC
GCA_000309255.1_gacin33v1.0	428	NOT_FOUND	NOIC
GCA_000309275.1_gacin36v1.0	1	NOT_FOUND	IC1
GCA_000314635.1_gacin31v1.0	412	NOT_FOUND	NOIC
GCA_000314655.1_gacin32v1.0	2	NOT_FOUND	IC2
GCA_000332855.1_AB53264	2	NOT_FOUND	IC2
GCA_000333715.1_ASM33371v1	2	NOT_FOUND	IC2
GCA_000333735.1_ASM33373v1	ND	NOT_FOUND	NOIC
GCA_000335535.1_gacin39v1.0	155	NOT_FOUND	NOIC
GCA_000335595.1_gacin50v1.0	158	NOT_FOUND	NOIC
GCA_000335615.1_gacin44v1.0	431	NOT_FOUND	NOIC
GCA_000335635.1_gacin46v1.0	665	NOT_FOUND	NOIC
GCA_000335655.1_gacin47v1.0	2	NOT_FOUND	IC2
GCA_000335675.1_gacin49v1.0	2	NOT_FOUND	IC2
GCA_000338835.1_454	255	NOT_FOUND	NOIC
GCA_000341985.1_Whole_genome_assembly	52	NOT_FOUND	NOIC
GCA_000342065.1_454	2	NOT_FOUND	IC2
GCA_000342085.1_454	516	NOT_FOUND	NOIC
GCA_000353775.1_ABNIH19_1	1	NOT_FOUND	IC1
GCA_000353795.1_ABNIH22_1	2	NOT_FOUND	IC2
GCA_000353815.1_ABNIH23_1	2	NOT_FOUND	IC2
GCA_000353855.1_ABNIH13_1	2	NOT_FOUND	IC2
GCA_000353895.1_ABNIH26_1	2	NOT_FOUND	IC2
GCA_000353915.1_ABNIH25_1	2	NOT_FOUND	IC2
GCA_000353935.1_ABNIH5_1	2	OXA-115	IC2
GCA_000353955.1_ABNIH6_1	1	OXA-69	IC1
GCA_000353975.1_ABNIH7_1	ND	NOT_FOUND	NOIC
GCA_000353995.1_ABNIH10_1	1	OXA-69	IC1
GCA_000354015.1_ABNIH11_1	1	NOT_FOUND	IC1
GCA_000354035.1_ABNIH14_1	2	NOT_FOUND	IC2
GCA_000354055.1_ABNIH15_1	2	NOT_FOUND	IC2
GCA_000354075.1_ABNIH16_1	2	NOT_FOUND	IC2
GCA_000354095.1_ABNIH17_1	2	NOT_FOUND	IC2
GCA_000354115.1_ABNIH18_1	2	NOT_FOUND	IC2
GCA_000354135.1_ABNIH20_1	2	NOT_FOUND	IC2
GCA_000354155.1_ABNIH24_1	2	NOT_FOUND	IC2
GCA_000359725.1_AB48055	2	NOT_FOUND	IC2
GCA_000367885.1_Acin_baum_NIPH_24_V1	2	NOT_FOUND	IC2
GCA_000368105.1_Acin_baum_NIPH_1669_V1	3	NOT_FOUND	IC3
GCA_000368125.1_Acin_baum_NIPH_1362_V1	47	NOT_FOUND	NOIC
GCA_000368185.1_Acin_baum_NIPH_146_V1	25	NOT_FOUND	IC7
GCA_000368205.1_Acin_baum_NIPH_615_V1	12	NOT_FOUND	NOIC
GCA_000368225.1_Acin_baum_NIPH_2061_V1	2	NOT_FOUND	IC2
GCA_000368245.1_Acin_baum_NIPH_1734_V1	15	NOT_FOUND	IC4
GCA_000368525.1_Acin_baum_NIPH_190_V1	9	NOT_FOUND	NOIC
GCA_000368545.1_Acin_baum_NIPH_60_V1	34	NOT_FOUND	NOIC
GCA_000369165.1_Acin_baum_NIPH_201_V1	38	NOT_FOUND	NOIC
GCA_000369185.1_Acin_baum_NIPH_527_V1	1	NOT_FOUND	IC1
GCA_000369205.1_Acin_baum_NIPH_335_V1	10	NOT_FOUND	IC8
GCA_000369225.1_Acin_baum_NIPH_329_V1	11	NOT_FOUND	NOIC
GCA_000369245.1_Acin_baum_NIPH_601_V1	40	NOT_FOUND	NOIC
GCA_000369265.1_Acin_baum_NIPH_67_V1	35	NOT_FOUND	NOIC
GCA_000369285.1_Acin_baum_NIPH_528_V1	2	NOT_FOUND	IC2
GCA_000369305.1_Acin_baum_NIPH_70_V1	36	NOT_FOUND	NOIC
GCA_000369325.1_Acin_baum_NIPH_290_V1	1	NOT_FOUND	IC1
GCA_000369345.1_Acin_baum_NIPH_80_V1	37	NOT_FOUND	NOIC
GCA_000369365.1_Acin_baum_ANC_4097_V1	1	NOT_FOUND	IC1
GCA_000369385.1_Acin_baum_CIP_70_34T_V1	52	NOT_FOUND	NOIC
GCA_000372585.2_ASM37258v2	239	NOT_FOUND	NOIC
GCA_000413915.1_Acin_baum_NIPH_410_V1	39	NOT_FOUND	NOIC
GCA_000417785.2_ASM41778v2	215	NOT_FOUND	NOIC
GCA_000417805.2_ASM41780v2	215	NOT_FOUND	NOIC
GCA_000419385.1_ASM41938v1	2	NOT_FOUND	IC2
GCA_000419405.1_ASM41940v1	23	NOT_FOUND	IC8
GCA_000419425.1_ASM41942v1	2	NOT_FOUND	IC2
GCA_000441955.1_gabv01	1	NOT_FOUND	IC1
GCA_000453025.1_ASM45302v1	78	NOT_FOUND	IC6
GCA_000453045.1_ASM45304v1	1	NOT_FOUND	IC1
GCA_000453065.1_ASM45306v1	2	NOT_FOUND	IC2
GCA_000453085.1_ASM45308v1	1	NOT_FOUND	IC1
GCA_000453105.1_ASM45310v1	1	NOT_FOUND	IC1
GCA_000453125.1_ASM45312v1	ND	NOT_FOUND	NOIC
GCA_000453145.1_ASM45314v1	2	NOT_FOUND	IC2
GCA_000453165.1_ASM45316v1	425	NOT_FOUND	NOIC
GCA_000453185.1_ASM45318v1	2	NOT_FOUND	IC2
GCA_000453205.1_ASM45320v1	1	NOT_FOUND	IC1
GCA_000453225.1_ASM45322v1	406	NOT_FOUND	NOIC
GCA_000453245.1_ASM45324v1	406	NOT_FOUND	NOIC
GCA_000453265.1_ASM45326v1	406	NOT_FOUND	NOIC
GCA_000453285.1_ASM45328v1	2	NOT_FOUND	IC2
GCA_000453305.1_ASM45330v1	2	NOT_FOUND	IC2
GCA_000453325.1_ASM45332v1	2	NOT_FOUND	IC2
GCA_000453345.1_ASM45334v1	2	NOT_FOUND	IC2
GCA_000453365.1_ASM45336v1	2	NOT_FOUND	IC2
GCA_000453385.1_ASM45338v1	2	NOT_FOUND	IC2
GCA_000453405.1_ASM45340v1	2	NOT_FOUND	IC2
GCA_000453425.1_ASM45342v1	2	NOT_FOUND	IC2
GCA_000453445.1_ASM45344v1	6	NOT_FOUND	IC9
GCA_000453465.1_ASM45346v1	427	NOT_FOUND	NOIC
GCA_000453485.1_ASM45348v1	417	NOT_FOUND	NOIC
GCA_000453505.1_ASM45350v1	417	NOT_FOUND	NOIC
GCA_000453525.1_ASM45352v1	2	NOT_FOUND	IC2
GCA_000453545.1_ASM45354v1	2	NOT_FOUND	IC2
GCA_000453565.1_ASM45356v1	2	NOT_FOUND	IC2
GCA_000453585.1_ASM45358v1	2	NOT_FOUND	IC2
GCA_000453605.1_ASM45360v1	33	NOT_FOUND	NOIC
GCA_000453625.1_ASM45362v1	79	NOT_FOUND	IC5
GCA_000453645.1_ASM45364v1	2	NOT_FOUND	IC2
GCA_000453665.1_ASM45366v1	2	NOT_FOUND	IC2
GCA_000453685.1_ASM45368v1	406	NOT_FOUND	NOIC
GCA_000453705.1_ASM45370v1	2	NOT_FOUND	IC2
GCA_000453725.1_ASM45372v1	411	NOT_FOUND	NOIC
GCA_000453745.1_ASM45374v1	2	NOT_FOUND	IC2
GCA_000453765.1_ASM45376v1	2	NOT_FOUND	IC2
GCA_000453785.1_ASM45378v1	2	NOT_FOUND	IC2
GCA_000453805.1_ASM45380v1	2	NOT_FOUND	IC2
GCA_000453825.1_ASM45382v1	2	NOT_FOUND	IC2
GCA_000453845.1_ASM45384v1	2	NOT_FOUND	IC2
GCA_000453865.1_ASM45386v1	2	NOT_FOUND	IC2
GCA_000453885.1_ASM45388v1	1	NOT_FOUND	IC1
GCA_000453905.1_ASM45390v1	2	NOT_FOUND	IC2
GCA_000453925.1_ASM45392v1	2	NOT_FOUND	IC2
GCA_000453945.1_ASM45394v1	1	NOT_FOUND	IC1
GCA_000453965.1_ASM45396v1	ND	NOT_FOUND	NOIC
GCA_000453985.1_ASM45398v1	ND	NOT_FOUND	NOIC
GCA_000454005.1_ASM45400v1	1	NOT_FOUND	IC1
GCA_000464705.1_ASM46470v1	2	OXA-66	IC2
GCA_000465635.2_GS_De_Novo_Assembly	221	NOT_FOUND	NOIC
GCA_000493615.1_ABIBUN_1	25	NOT_FOUND	IC7
GCA_000498375.2_ASM49837v2	2	NOT_FOUND	IC2
GCA_000505685.2_ASM50568v2	639	OXA-126	NOIC
GCA_000509305.1_ASM50930v1	2	OXA-115	IC2
GCA_000509325.1_ASM50932v1	2	OXA-254	IC2
GCA_000509345.1_ASM50934v1	2	OXA-66	IC2
GCA_000513795.2_gabuh0207_v01	2	NOT_FOUND	IC2
GCA_000515435.1_gabuh0807_v01	2	NOT_FOUND	IC2
GCA_000515455.1_gabuh1007_v01	2	NOT_FOUND	IC2
GCA_000515475.1_gabuh10007_v01	2	NOT_FOUND	IC2
GCA_000515495.1_gabuh0707_v01	2	NOT_FOUND	IC2
GCA_000515515.1_gabuh10107_v01	2	NOT_FOUND	IC2
GCA_000515535.1_gabuh10707_v01	2	NOT_FOUND	IC2
GCA_000515555.1_gabuh11608_v01	2	NOT_FOUND	IC2
GCA_000515575.1_gabuh12208_v01	79	NOT_FOUND	IC5
GCA_000515595.1_gabuh12308_v01	2	NOT_FOUND	IC2
GCA_000515615.1_gabuh12408_v01	2	NOT_FOUND	IC2
GCA_000515635.1_gabuh12808_v01	2	NOT_FOUND	IC2
GCA_000515655.1_gabuh13908_v01	2	NOT_FOUND	IC2
GCA_000515675.1_gabuh14508_v01	2	NOT_FOUND	IC2
GCA_000515695.1_gabuh15208_v01	2	NOT_FOUND	IC2
GCA_000515715.1_gabuh16008_v01	2	NOT_FOUND	IC2
GCA_000515735.1_gabuh16108_v01	2	NOT_FOUND	IC2
GCA_000515755.1_gabuh16208_v01	79	NOT_FOUND	IC5
GCA_000515775.1_gabuh18608_v01	2	NOT_FOUND	IC2
GCA_000515795.2_gabuh19608_v01	79	OXA-65	IC5
GCA_000515815.1_gabuh19908_v01	2	NOT_FOUND	IC2
GCA_000515835.1_gabuh20108_v01	2	NOT_FOUND	IC2
GCA_000515855.1_gabuh22908_v01	79	NOT_FOUND	IC5
GCA_000515875.2_gabuh8907_v01	524	NOT_FOUND	NOIC
GCA_000515895.1_gabuh2307_v01	2	NOT_FOUND	IC2
GCA_000515915.1_gabuh8107_v01	2	NOT_FOUND	IC2
GCA_000515935.1_gabuh8407_v01	2	NOT_FOUND	IC2
GCA_000515955.1_gabuh8707_v01	2	NOT_FOUND	IC2
GCA_000515975.1_gabuh8807_v01	2	NOT_FOUND	IC2
GCA_000515995.2_gabuh9007_v01	2	NOT_FOUND	IC2
GCA_000516015.1_gabuh9707_v01	2	NOT_FOUND	IC2
GCA_000516035.1_gabuh9907_v01	2	NOT_FOUND	IC2
GCA_000516055.1_gabuh2907_v01	2	NOT_FOUND	IC2
GCA_000516075.1_gabuh2707_v01	2	NOT_FOUND	IC2
GCA_000516095.2_gabuh99pb_v01	2	OXA-66	IC2
GCA_000516115.1_gabuh107pb_v01	2	NOT_FOUND	IC2
GCA_000516135.1_gabuh5107_v01	406	NOT_FOUND	NOIC
GCA_000516155.1_gabuh5207_v01	78	NOT_FOUND	IC6
GCA_000516175.1_gabuh5307_v01	2	NOT_FOUND	IC2
GCA_000516195.2_gabuh5707_v01	2	NOT_FOUND	IC2
GCA_000516215.2_gabuh6107_v01	2	NOT_FOUND	IC2
GCA_000516235.1_gabuh6207_v01	2	NOT_FOUND	IC2
GCA_000516255.1_gabuh6507_v01	669	NOT_FOUND	NOIC
GCA_000516275.1_gabuh6907_v01	79	NOT_FOUND	IC5
GCA_000516295.1_gabuh7007_v01	2	NOT_FOUND	IC2
GCA_000516315.1_gabuh7607_v01	79	NOT_FOUND	IC5
GCA_000516335.2_gabuh7707_v01	2	NOT_FOUND	IC2
GCA_000516355.2_gabuh7807_v01	2	NOT_FOUND	IC2
GCA_000516375.1_gabuh7907_v01	79	NOT_FOUND	IC5
GCA_000516575.2_ASM51657v2	25	NOT_FOUND	IC7
GCA_000516595.2_ASM51659v2	2	NOT_FOUND	IC2
GCA_000516635.2_ASM51663v2	25	NOT_FOUND	IC7
GCA_000517485.2_gabuh2107_v01	2	NOT_FOUND	IC2
GCA_000517505.1_gabuh3807_v01	2	NOT_FOUND	IC2
GCA_000522525.1_AB-MDR-MMC4	ND	OXA-916	NOIC
GCA_000576535.1_ASM57653v1	ND	NOT_FOUND	NOIC
GCA_000580135.1_ASM58013v1	2	NOT_FOUND	IC2
GCA_000580155.1_ASM58015v1	514	NOT_FOUND	NOIC
GCA_000580175.1_ASM58017v1	523	NOT_FOUND	NOIC
GCA_000580195.1_ASM58019v1	2	NOT_FOUND	IC2
GCA_000580215.1_ASM58021v1	ND	NOT_FOUND	NOIC
GCA_000580235.1_ASM58023v1	2	NOT_FOUND	IC2
GCA_000580255.1_ASM58025v1	416	NOT_FOUND	NOIC
GCA_000580275.1_ASM58027v1	2	NOT_FOUND	IC2
GCA_000580295.1_ASM58029v1	2	NOT_FOUND	IC2
GCA_000580315.1_ASM58031v1	537	NOT_FOUND	NOIC
GCA_000580335.1_ASM58033v1	2	NOT_FOUND	IC2
GCA_000580355.2_ASM58035v2	500	OXA-71	IC3
GCA_000580375.1_ASM58037v1	2	NOT_FOUND	IC2
GCA_000580395.1_ASM58039v1	2	NOT_FOUND	IC2
GCA_000580415.1_ASM58041v1	16	NOT_FOUND	NOIC
GCA_000580435.2_ASM58043v2	416	OXA-242	NOIC
GCA_000580455.1_ASM58045v1	527	NOT_FOUND	NOIC
GCA_000580475.1_ASM58047v1	2	NOT_FOUND	IC2
GCA_000580495.2_ASM58049v2	499	OXA-95	NOIC
GCA_000580515.1_ASM58051v1	241	NOT_FOUND	NOIC
GCA_000580535.1_ASM58053v1	416	NOT_FOUND	NOIC
GCA_000580555.1_ASM58055v1	2	NOT_FOUND	IC2
GCA_000580575.1_ASM58057v1	2	NOT_FOUND	IC2
GCA_000580595.1_ASM58059v1	529	NOT_FOUND	NOIC
GCA_000580615.1_ASM58061v1	203	NOT_FOUND	NOIC
GCA_000580655.1_ASM58065v1	ND	NOT_FOUND	NOIC
GCA_000580695.1_ASM58069v1	512	NOT_FOUND	NOIC
GCA_000580715.1_ASM58071v1	503	NOT_FOUND	NOIC
GCA_000580735.1_ASM58073v1	2	NOT_FOUND	IC2
GCA_000580755.1_ASM58075v1	499	NOT_FOUND	NOIC
GCA_000580775.1_ASM58077v1	528	NOT_FOUND	NOIC
GCA_000580795.1_ASM58079v1	ND	NOT_FOUND	NOIC
GCA_000580815.1_ASM58081v1	536	NOT_FOUND	NOIC
GCA_000580835.1_ASM58083v1	2	NOT_FOUND	IC2
GCA_000580875.1_ASM58087v1	240	NOT_FOUND	NOIC
GCA_000580895.1_ASM58089v1	ND	NOT_FOUND	NOIC
GCA_000580915.1_ASM58091v1	ND	NOT_FOUND	NOIC
GCA_000580935.1_ASM58093v1	ND	NOT_FOUND	NOIC
GCA_000580975.1_ASM58097v1	508	NOT_FOUND	NOIC
GCA_000580995.1_ASM58099v1	10	NOT_FOUND	IC8
GCA_000581015.1_ASM58101v1	2	NOT_FOUND	IC2
GCA_000581055.1_ASM58105v1	25	NOT_FOUND	IC7
GCA_000581075.1_ASM58107v1	103	NOT_FOUND	NOIC
GCA_000581135.1_ASM58113v1	25	NOT_FOUND	IC7
GCA_000581155.1_ASM58115v1	49	NOT_FOUND	NOIC
GCA_000581175.1_ASM58117v1	2	NOT_FOUND	IC2
GCA_000581235.1_ASM58123v1	2	NOT_FOUND	IC2
GCA_000581255.1_ASM58125v1	509	NOT_FOUND	NOIC
GCA_000581295.1_ASM58129v1	506	NOT_FOUND	NOIC
GCA_000581315.1_ASM58131v1	16	NOT_FOUND	NOIC
GCA_000581335.1_ASM58133v1	2	NOT_FOUND	IC2
GCA_000581355.1_ASM58135v1	2	NOT_FOUND	IC2
GCA_000581375.1_ASM58137v1	2	NOT_FOUND	IC2
GCA_000581395.1_ASM58139v1	2	NOT_FOUND	IC2
GCA_000581415.1_ASM58141v1	2	NOT_FOUND	IC2
GCA_000581435.1_ASM58143v1	ND	NOT_FOUND	NOIC
GCA_000581455.1_ASM58145v1	2	NOT_FOUND	IC2
GCA_000581475.1_ASM58147v1	416	NOT_FOUND	NOIC
GCA_000581495.1_ASM58149v1	2	NOT_FOUND	IC2
GCA_000581515.1_ASM58151v1	670	NOT_FOUND	NOIC
GCA_000581535.1_ASM58153v1	2	NOT_FOUND	IC2
GCA_000581555.1_ASM58155v1	522	NOT_FOUND	NOIC
GCA_000581575.1_ASM58157v1	2	NOT_FOUND	IC2
GCA_000581595.1_ASM58159v1	650	NOT_FOUND	NOIC
GCA_000581615.1_ASM58161v1	2	NOT_FOUND	IC2
GCA_000581635.1_ASM58163v1	2	NOT_FOUND	IC2
GCA_000581655.1_ASM58165v1	2	NOT_FOUND	IC2
GCA_000581675.1_ASM58167v1	2	NOT_FOUND	IC2
GCA_000581695.1_ASM58169v1	2	NOT_FOUND	IC2
GCA_000581735.1_ASM58173v1	2	NOT_FOUND	IC2
GCA_000581755.1_ASM58175v1	78	NOT_FOUND	IC6
GCA_000581775.1_ASM58177v1	505	NOT_FOUND	NOIC
GCA_000581795.1_ASM58179v1	ND	NOT_FOUND	NOIC
GCA_000581815.1_ASM58181v1	2	NOT_FOUND	IC2
GCA_000581855.1_ASM58185v1	533	NOT_FOUND	NOIC
GCA_000581875.1_ASM58187v1	154	NOT_FOUND	NOIC
GCA_000581895.1_ASM58189v1	ND	NOT_FOUND	NOIC
GCA_000581915.1_ASM58191v1	16	NOT_FOUND	NOIC
GCA_000581935.1_ASM58193v1	2	NOT_FOUND	IC2
GCA_000581955.1_ASM58195v1	16	NOT_FOUND	NOIC
GCA_000581975.1_ASM58197v1	78	NOT_FOUND	IC6
GCA_000581995.1_ASM58199v1	ND	NOT_FOUND	NOIC
GCA_000582015.1_ASM58201v1	2	NOT_FOUND	IC2
GCA_000582035.1_ASM58203v1	514	NOT_FOUND	NOIC
GCA_000582115.1_ASM58211v1	2	NOT_FOUND	IC2
GCA_000582155.1_ASM58215v1	10	NOT_FOUND	IC8
GCA_000582175.1_ASM58217v1	32	NOT_FOUND	NOIC
GCA_000582215.1_ASM58221v1	2	NOT_FOUND	IC2
GCA_000582275.1_ASM58227v1	499	NOT_FOUND	NOIC
GCA_000582295.1_ASM58229v1	514	NOT_FOUND	NOIC
GCA_000582335.1_ASM58233v1	2	NOT_FOUND	IC2
GCA_000582355.1_ASM58235v1	108	NOT_FOUND	NOIC
GCA_000582945.1_ASM58294v1	2	NOT_FOUND	IC2
GCA_000582965.2_ASM58296v2	16	OXA-402	NOIC
GCA_000583235.1_ASM58323v1	2	NOT_FOUND	IC2
GCA_000583255.1_ASM58325v1	2	NOT_FOUND	IC2
GCA_000583275.1_ASM58327v1	499	NOT_FOUND	NOIC
GCA_000583295.1_ASM58329v1	2	NOT_FOUND	IC2
GCA_000583315.1_ASM58331v1	2	NOT_FOUND	IC2
GCA_000583335.1_ASM58333v1	2	NOT_FOUND	IC2
GCA_000583355.1_ASM58335v1	2	NOT_FOUND	IC2
GCA_000583375.1_ASM58337v1	ND	NOT_FOUND	NOIC
GCA_000583415.1_ASM58341v1	500	NOT_FOUND	IC3
GCA_000583435.1_ASM58343v1	2	NOT_FOUND	IC2
GCA_000583455.1_ASM58345v1	2	NOT_FOUND	IC2
GCA_000583475.1_ASM58347v1	526	NOT_FOUND	NOIC
GCA_000583495.1_ASM58349v1	525	NOT_FOUND	NOIC
GCA_000583515.1_ASM58351v1	2	NOT_FOUND	IC2
GCA_000583535.1_ASM58353v1	ND	NOT_FOUND	NOIC
GCA_000583555.1_ASM58355v1	ND	NOT_FOUND	NOIC
GCA_000583575.1_ASM58357v1	2	NOT_FOUND	IC2
GCA_000583595.1_ASM58359v1	2	NOT_FOUND	IC2
GCA_000584035.1_ASM58403v1	195	NOT_FOUND	IC2
GCA_000584055.1_ASM58405v1	ND	NOT_FOUND	NOIC
GCA_000584075.1_ASM58407v1	2	NOT_FOUND	IC2
GCA_000584095.1_ASM58409v1	535	NOT_FOUND	NOIC
GCA_000584115.1_ASM58411v1	2	NOT_FOUND	IC2
GCA_000584135.1_ASM58413v1	2	NOT_FOUND	IC2
GCA_000584155.1_ASM58415v1	2	NOT_FOUND	IC2
GCA_000584175.1_ASM58417v1	2	NOT_FOUND	IC2
GCA_000584195.1_ASM58419v1	2	NOT_FOUND	IC2
GCA_000584235.1_ASM58423v1	2	NOT_FOUND	IC2
GCA_000584275.1_ASM58427v1	500	NOT_FOUND	IC3
GCA_000584295.1_ASM58429v1	499	NOT_FOUND	NOIC
GCA_000584315.1_ASM58431v1	499	NOT_FOUND	NOIC
GCA_000584335.1_ASM58433v1	10	NOT_FOUND	IC8
GCA_000584355.1_ASM58435v1	651	NOT_FOUND	NOIC
GCA_000584375.2_ASM58437v2	2	OXA-115	IC2
GCA_000584395.1_ASM58439v1	2	NOT_FOUND	IC2
GCA_000584415.1_ASM58441v1	510	NOT_FOUND	NOIC
GCA_000584435.1_ASM58443v1	2	NOT_FOUND	IC2
GCA_000584455.1_ASM58445v1	49	NOT_FOUND	NOIC
GCA_000584475.1_ASM58447v1	2	NOT_FOUND	IC2
GCA_000584495.1_ASM58449v1	2	NOT_FOUND	IC2
GCA_000584515.2_ASM58451v2	499	OXA-95	NOIC
GCA_000584535.1_ASM58453v1	500	NOT_FOUND	IC3
GCA_000584555.1_ASM58455v1	2	NOT_FOUND	IC2
GCA_000584595.1_ASM58459v1	500	NOT_FOUND	IC3
GCA_000584635.1_ASM58463v1	500	NOT_FOUND	IC3
GCA_000584655.1_ASM58465v1	2	NOT_FOUND	IC2
GCA_000584675.1_ASM58467v1	2	NOT_FOUND	IC2
GCA_000584695.1_ASM58469v1	16	NOT_FOUND	NOIC
GCA_000584715.1_ASM58471v1	54	NOT_FOUND	NOIC
GCA_000584735.1_ASM58473v1	2	NOT_FOUND	IC2
GCA_000584755.1_ASM58475v1	671	NOT_FOUND	NOIC
GCA_000584775.1_ASM58477v1	2	NOT_FOUND	IC2
GCA_000584835.1_ASM58483v1	2	NOT_FOUND	IC2
GCA_000584855.1_ASM58485v1	499	NOT_FOUND	NOIC
GCA_000584875.1_ASM58487v1	2	NOT_FOUND	IC2
GCA_000584895.1_ASM58489v1	2	NOT_FOUND	IC2
GCA_000586635.1_MRSN57	1	NOT_FOUND	IC1
GCA_000586655.1_MRSN58	1	NOT_FOUND	IC1
GCA_000587875.1_ASM58787v1	2	NOT_FOUND	IC2
GCA_000587895.1_ASM58789v1	2	NOT_FOUND	IC2
GCA_000587915.1_ASM58791v1	2	NOT_FOUND	IC2
GCA_000587935.1_ASM58793v1	2	NOT_FOUND	IC2
GCA_000587955.1_ASM58795v1	499	NOT_FOUND	NOIC
GCA_000587975.1_ASM58797v1	2	NOT_FOUND	IC2
GCA_000588035.1_ASM58803v1	532	NOT_FOUND	NOIC
GCA_000588055.1_ASM58805v1	2	NOT_FOUND	IC2
GCA_000588075.1_ASM58807v1	416	NOT_FOUND	NOIC
GCA_000588115.1_ASM58811v1	500	NOT_FOUND	IC3
GCA_000588135.1_ASM58813v1	652	NOT_FOUND	NOIC
GCA_000588155.1_ASM58815v1	2	NOT_FOUND	IC2
GCA_000588175.1_ASM58817v1	2	NOT_FOUND	IC2
GCA_000588195.1_ASM58819v1	652	NOT_FOUND	NOIC
GCA_000588215.1_ASM58821v1	2	NOT_FOUND	IC2
GCA_000588235.1_ASM58823v1	499	NOT_FOUND	NOIC
GCA_000588275.1_ASM58827v1	563	NOT_FOUND	NOIC
GCA_000588295.1_ASM58829v1	2	NOT_FOUND	IC2
GCA_000588315.1_ASM58831v1	2	NOT_FOUND	IC2
GCA_000588355.1_ASM58835v1	521	NOT_FOUND	NOIC
GCA_000588375.1_ASM58837v1	2	NOT_FOUND	IC2
GCA_000588435.1_ASM58843v1	2	NOT_FOUND	IC2
GCA_000588455.1_ASM58845v1	2	NOT_FOUND	IC2
GCA_000588475.1_ASM58847v1	652	NOT_FOUND	NOIC
GCA_000588495.1_ASM58849v1	2	NOT_FOUND	IC2
GCA_000588555.1_ASM58855v1	2	NOT_FOUND	IC2
GCA_000588575.2_ASM58857v2	ND	OXA-66	NOIC
GCA_000588615.1_ASM58861v1	499	NOT_FOUND	NOIC
GCA_000588635.1_ASM58863v1	2	NOT_FOUND	IC2
GCA_000588655.1_ASM58865v1	2	NOT_FOUND	IC2
GCA_000588675.1_ASM58867v1	10	NOT_FOUND	IC8
GCA_000588695.1_ASM58869v1	2	NOT_FOUND	IC2
GCA_000588735.1_ASM58873v1	2	NOT_FOUND	IC2
GCA_000588755.1_ASM58875v1	285	NOT_FOUND	NOIC
GCA_000588775.1_ASM58877v1	499	NOT_FOUND	NOIC
GCA_000588795.1_ASM58879v1	2	NOT_FOUND	IC2
GCA_000588815.1_ASM58881v1	2	NOT_FOUND	IC2
GCA_000588895.1_ASM58889v1	2	NOT_FOUND	IC2
GCA_000588915.1_ASM58891v1	2	NOT_FOUND	IC2
GCA_000588935.1_ASM58893v1	2	NOT_FOUND	IC2
GCA_000588955.1_ASM58895v1	2	NOT_FOUND	IC2
GCA_000588975.1_ASM58897v1	2	NOT_FOUND	IC2
GCA_000588995.1_ASM58899v1	2	NOT_FOUND	IC2
GCA_000589015.1_ASM58901v1	2	NOT_FOUND	IC2
GCA_000589035.1_ASM58903v1	2	NOT_FOUND	IC2
GCA_000589055.1_ASM58905v1	2	NOT_FOUND	IC2
GCA_000589075.1_ASM58907v1	2	NOT_FOUND	IC2
GCA_000589095.1_ASM58909v1	2	NOT_FOUND	IC2
GCA_000589195.1_ASM58919v1	2	NOT_FOUND	IC2
GCA_000589275.1_ASM58927v1	2	NOT_FOUND	IC2
GCA_000589295.1_ASM58929v1	2	NOT_FOUND	IC2
GCA_000589315.1_ASM58931v1	2	NOT_FOUND	IC2
GCA_000589355.1_ASM58935v1	2	NOT_FOUND	IC2
GCA_000589375.1_ASM58937v1	2	NOT_FOUND	IC2
GCA_000589395.1_ASM58939v1	2	NOT_FOUND	IC2
GCA_000589415.1_ASM58941v1	2	NOT_FOUND	IC2
GCA_000589435.1_ASM58943v1	2	NOT_FOUND	IC2
GCA_000589455.1_ASM58945v1	2	NOT_FOUND	IC2
GCA_000589475.1_ASM58947v1	2	NOT_FOUND	IC2
GCA_000589495.1_ASM58949v1	2	NOT_FOUND	IC2
GCA_000589515.1_ASM58951v1	2	NOT_FOUND	IC2
GCA_000589535.1_ASM58953v1	2	NOT_FOUND	IC2
GCA_000589555.1_ASM58955v1	2	NOT_FOUND	IC2
GCA_000589575.1_ASM58957v1	2	NOT_FOUND	IC2
GCA_000589595.1_ASM58959v1	2	NOT_FOUND	IC2
GCA_000589615.1_ASM58961v1	2	NOT_FOUND	IC2
GCA_000589635.1_ASM58963v1	661	NOT_FOUND	NOIC
GCA_000589655.1_ASM58965v1	2	NOT_FOUND	IC2
GCA_000589675.1_ASM58967v1	2	NOT_FOUND	IC2
GCA_000589695.1_ASM58969v1	2	NOT_FOUND	IC2
GCA_000589715.1_ASM58971v1	2	NOT_FOUND	IC2
GCA_000589735.1_ASM58973v1	2	NOT_FOUND	IC2
GCA_000589755.1_ASM58975v1	2	NOT_FOUND	IC2
GCA_000589775.1_ASM58977v1	2	NOT_FOUND	IC2
GCA_000589795.1_ASM58979v1	2	NOT_FOUND	IC2
GCA_000589815.1_ASM58981v1	2	NOT_FOUND	IC2
GCA_000589835.1_ASM58983v1	2	NOT_FOUND	IC2
GCA_000591575.1_ASM59157v1	2	NOT_FOUND	IC2
GCA_000591595.1_ASM59159v1	2	NOT_FOUND	IC2
GCA_000591615.1_ASM59161v1	2	NOT_FOUND	IC2
GCA_000591635.1_ASM59163v1	2	NOT_FOUND	IC2
GCA_000591655.1_ASM59165v1	2	NOT_FOUND	IC2
GCA_000591675.1_ASM59167v1	2	NOT_FOUND	IC2
GCA_000591695.1_ASM59169v1	2	NOT_FOUND	IC2
GCA_000591715.1_ASM59171v1	2	NOT_FOUND	IC2
GCA_000591735.1_ASM59173v1	2	NOT_FOUND	IC2
GCA_000591755.1_ASM59175v1	2	NOT_FOUND	IC2
GCA_000591775.1_ASM59177v1	2	NOT_FOUND	IC2
GCA_000591795.1_ASM59179v1	2	NOT_FOUND	IC2
GCA_000591815.1_ASM59181v1	2	NOT_FOUND	IC2
GCA_000591835.1_ASM59183v1	2	NOT_FOUND	IC2
GCA_000591855.1_ASM59185v1	2	NOT_FOUND	IC2
GCA_000591875.1_ASM59187v1	2	NOT_FOUND	IC2
GCA_000591895.1_ASM59189v1	2	NOT_FOUND	IC2
GCA_000591915.1_ASM59191v1	2	NOT_FOUND	IC2
GCA_000591935.1_ASM59193v1	2	NOT_FOUND	IC2
GCA_000591955.1_ASM59195v1	2	NOT_FOUND	IC2
GCA_000591975.1_ASM59197v1	2	NOT_FOUND	IC2
GCA_000591995.1_ASM59199v1	2	NOT_FOUND	IC2
GCA_000592015.1_ASM59201v1	2	NOT_FOUND	IC2
GCA_000592035.1_ASM59203v1	2	NOT_FOUND	IC2
GCA_000592055.1_ASM59205v1	2	NOT_FOUND	IC2
GCA_000592075.1_ASM59207v1	2	NOT_FOUND	IC2
GCA_000592095.1_ASM59209v1	2	NOT_FOUND	IC2
GCA_000592115.1_ASM59211v1	2	NOT_FOUND	IC2
GCA_000592135.1_ASM59213v1	2	NOT_FOUND	IC2
GCA_000592155.1_ASM59215v1	2	NOT_FOUND	IC2
GCA_000592175.1_ASM59217v1	2	NOT_FOUND	IC2
GCA_000592195.1_ASM59219v1	2	NOT_FOUND	IC2
GCA_000592215.1_ASM59221v1	2	NOT_FOUND	IC2
GCA_000592235.1_ASM59223v1	2	NOT_FOUND	IC2
GCA_000592255.1_ASM59225v1	2	NOT_FOUND	IC2
GCA_000592275.1_ASM59227v1	2	NOT_FOUND	IC2
GCA_000592295.1_ASM59229v1	2	NOT_FOUND	IC2
GCA_000592315.1_ASM59231v1	2	NOT_FOUND	IC2
GCA_000592335.1_ASM59233v1	2	NOT_FOUND	IC2
GCA_000592355.1_ASM59235v1	2	NOT_FOUND	IC2
GCA_000592375.1_ASM59237v1	2	NOT_FOUND	IC2
GCA_000592395.1_ASM59239v1	2	NOT_FOUND	IC2
GCA_000592415.1_ASM59241v1	2	NOT_FOUND	IC2
GCA_000592435.1_ASM59243v1	2	NOT_FOUND	IC2
GCA_000592455.1_ASM59245v1	2	NOT_FOUND	IC2
GCA_000592475.1_ASM59247v1	2	NOT_FOUND	IC2
GCA_000592495.1_ASM59249v1	2	NOT_FOUND	IC2
GCA_000592515.1_ASM59251v1	2	NOT_FOUND	IC2
GCA_000592535.1_ASM59253v1	2	NOT_FOUND	IC2
GCA_000592555.1_ASM59255v1	2	NOT_FOUND	IC2
GCA_000592575.1_ASM59257v1	2	NOT_FOUND	IC2
GCA_000592595.1_ASM59259v1	2	NOT_FOUND	IC2
GCA_000592615.1_ASM59261v1	2	NOT_FOUND	IC2
GCA_000592635.1_ASM59263v1	2	NOT_FOUND	IC2
GCA_000592655.1_ASM59265v1	662	NOT_FOUND	NOIC
GCA_000592675.1_ASM59267v1	2	NOT_FOUND	IC2
GCA_000592695.1_ASM59269v1	2	NOT_FOUND	IC2
GCA_000592715.1_ASM59271v1	2	NOT_FOUND	IC2
GCA_000592735.1_ASM59273v1	2	NOT_FOUND	IC2
GCA_000592755.1_ASM59275v1	2	NOT_FOUND	IC2
GCA_000600375.1_ASM60037v1	2	NOT_FOUND	IC2
GCA_000600395.1_ASM60039v1	2	NOT_FOUND	IC2
GCA_000600415.1_ASM60041v1	2	NOT_FOUND	IC2
GCA_000600435.1_ASM60043v1	2	NOT_FOUND	IC2
GCA_000600455.1_ASM60045v1	2	NOT_FOUND	IC2
GCA_000600475.1_ASM60047v1	2	NOT_FOUND	IC2
GCA_000600495.1_ASM60049v1	2	NOT_FOUND	IC2
GCA_000600515.1_ASM60051v1	2	NOT_FOUND	IC2
GCA_000600535.1_ASM60053v1	2	NOT_FOUND	IC2
GCA_000600555.1_ASM60055v1	2	NOT_FOUND	IC2
GCA_000600575.1_ASM60057v1	2	NOT_FOUND	IC2
GCA_000600595.1_ASM60059v1	2	NOT_FOUND	IC2
GCA_000600615.1_ASM60061v1	2	NOT_FOUND	IC2
GCA_000600635.1_ASM60063v1	2	NOT_FOUND	IC2
GCA_000600655.1_ASM60065v1	2	NOT_FOUND	IC2
GCA_000600675.1_ASM60067v1	2	NOT_FOUND	IC2
GCA_000600695.1_ASM60069v1	2	NOT_FOUND	IC2
GCA_000600715.1_ASM60071v1	2	NOT_FOUND	IC2
GCA_000600735.1_ASM60073v1	417	NOT_FOUND	NOIC
GCA_000600755.1_ASM60075v1	656	NOT_FOUND	NOIC
GCA_000600775.1_ASM60077v1	417	NOT_FOUND	NOIC
GCA_000600795.1_ASM60079v1	416	NOT_FOUND	NOIC
GCA_000600815.1_ASM60081v1	657	NOT_FOUND	NOIC
GCA_000600835.1_ASM60083v1	658	NOT_FOUND	NOIC
GCA_000600855.1_ASM60085v1	659	NOT_FOUND	NOIC
GCA_000600875.1_ASM60087v1	416	NOT_FOUND	NOIC
GCA_000600895.1_ASM60089v1	417	NOT_FOUND	NOIC
GCA_000600915.1_ASM60091v1	2	NOT_FOUND	IC2
GCA_000600935.1_ASM60093v1	2	NOT_FOUND	IC2
GCA_000611045.1_ASM61104v1	415	NOT_FOUND	NOIC
GCA_000611065.1_ASM61106v1	415	NOT_FOUND	NOIC
GCA_000611085.1_ASM61108v1	415	NOT_FOUND	NOIC
GCA_000611105.1_ASM61110v1	415	NOT_FOUND	NOIC
GCA_000611165.1_ASM61116v1	415	NOT_FOUND	NOIC
GCA_000611185.1_ASM61118v1	415	NOT_FOUND	NOIC
GCA_000611205.1_ASM61120v1	416	NOT_FOUND	NOIC
GCA_000611225.1_ASM61122v1	417	NOT_FOUND	NOIC
GCA_000611245.1_ASM61124v1	417	NOT_FOUND	NOIC
GCA_000611265.1_ASM61126v1	2	NOT_FOUND	IC2
GCA_000611285.1_ASM61128v1	514	NOT_FOUND	NOIC
GCA_000611305.1_ASM61130v1	514	NOT_FOUND	NOIC
GCA_000611325.1_ASM61132v1	2	NOT_FOUND	IC2
GCA_000611345.1_ASM61134v1	2	NOT_FOUND	IC2
GCA_000611365.1_ASM61136v1	416	NOT_FOUND	NOIC
GCA_000611385.1_ASM61138v1	660	NOT_FOUND	NOIC
GCA_000611405.1_ASM61140v1	2	NOT_FOUND	IC2
GCA_000611425.1_ASM61142v1	2	NOT_FOUND	IC2
GCA_000611445.1_ASM61144v1	2	NOT_FOUND	IC2
GCA_000611465.1_ASM61146v1	417	NOT_FOUND	NOIC
GCA_000611485.1_ASM61148v1	514	NOT_FOUND	NOIC
GCA_000611505.1_ASM61150v1	2	NOT_FOUND	IC2
GCA_000611525.1_ASM61152v1	2	NOT_FOUND	IC2
GCA_000611545.1_ASM61154v1	415	NOT_FOUND	NOIC
GCA_000611565.1_ASM61156v1	2	NOT_FOUND	IC2
GCA_000614705.1_ASM61470v1	52	OXA-694	NOIC
GCA_000623015.1_Acin_baum_LAC-4_V1	10	NOT_FOUND	IC8
GCA_000623035.1_Acin_baum_R1B_V1	1	NOT_FOUND	IC1
GCA_000627335.1_ASM62733v1	2	NOT_FOUND	IC2
GCA_000627355.1_ASM62735v1	2	NOT_FOUND	IC2
GCA_000627375.1_ASM62737v1	ND	NOT_FOUND	NOIC
GCA_000627395.1_ASM62739v1	2	NOT_FOUND	IC2
GCA_000627415.1_ASM62741v1	2	NOT_FOUND	IC2
GCA_000627495.1_ASM62749v1	2	NOT_FOUND	IC2
GCA_000627515.1_ASM62751v1	2	NOT_FOUND	IC2
GCA_000627535.1_ASM62753v1	2	NOT_FOUND	IC2
GCA_000627555.1_ASM62755v1	2	NOT_FOUND	IC2
GCA_000627575.1_ASM62757v1	2	NOT_FOUND	IC2
GCA_000627595.1_ASM62759v1	2	NOT_FOUND	IC2
GCA_000627615.1_ASM62761v1	2	NOT_FOUND	IC2
GCA_000627635.1_ASM62763v1	416	NOT_FOUND	NOIC
GCA_000627655.1_ASM62765v1	416	NOT_FOUND	NOIC
GCA_000627675.1_ASM62767v1	ND	NOT_FOUND	NOIC
GCA_000627695.1_ASM62769v1	673	NOT_FOUND	NOIC
GCA_000627715.1_ASM62771v1	674	NOT_FOUND	NOIC
GCA_000627735.1_ASM62773v1	2	NOT_FOUND	IC2
GCA_000627755.1_ASM62775v1	500	NOT_FOUND	IC3
GCA_000627775.1_ASM62777v1	514	NOT_FOUND	NOIC
GCA_000671415.1_ASM67141v1	514	NOT_FOUND	NOIC
GCA_000671435.1_ASM67143v1	ND	NOT_FOUND	NOIC
GCA_000671455.1_ASM67145v1	ND	OXA-66	NOIC
GCA_000671475.1_ASM67147v1	514	NOT_FOUND	NOIC
GCA_000671495.1_ASM67149v1	2	NOT_FOUND	IC2
GCA_000671515.1_ASM67151v1	2	NOT_FOUND	IC2
GCA_000671535.1_ASM67153v1	2	NOT_FOUND	IC2
GCA_000671555.1_ASM67155v1	2	NOT_FOUND	IC2
GCA_000671575.1_ASM67157v1	2	NOT_FOUND	IC2
GCA_000671595.1_ASM67159v1	514	NOT_FOUND	NOIC
GCA_000671615.1_ASM67161v1	514	NOT_FOUND	NOIC
GCA_000671635.1_ASM67163v1	514	NOT_FOUND	NOIC
GCA_000671655.1_ASM67165v1	2	NOT_FOUND	IC2
GCA_000671675.1_ASM67167v1	500	NOT_FOUND	IC3
GCA_000671695.1_ASM67169v1	2	OXA-115	IC2
GCA_000681555.1_ASM68155v1	ND	NOT_FOUND	NOIC
GCA_000681575.1_ASM68157v1	336	NOT_FOUND	NOIC
GCA_000681595.1_ASM68159v1	1143	NOT_FOUND	NOIC
GCA_000681615.1_ASM68161v1	417	NOT_FOUND	NOIC
GCA_000681635.1_ASM68163v1	499	NOT_FOUND	NOIC
GCA_000681655.1_ASM68165v1	2	NOT_FOUND	IC2
GCA_000681675.1_ASM68167v1	2	NOT_FOUND	IC2
GCA_000681695.1_ASM68169v1	2	NOT_FOUND	IC2
GCA_000681715.1_ASM68171v1	ND	OXA-500	NOIC
GCA_000681735.1_ASM68173v1	2	NOT_FOUND	IC2
GCA_000681755.1_ASM68175v1	500	NOT_FOUND	IC3
GCA_000681775.1_ASM68177v1	514	NOT_FOUND	NOIC
GCA_000681795.1_ASM68179v1	514	NOT_FOUND	NOIC
GCA_000681835.1_ASM68183v1	2	NOT_FOUND	IC2
GCA_000681855.1_ASM68185v1	2	NOT_FOUND	IC2
GCA_000681875.1_ASM68187v1	2	NOT_FOUND	IC2
GCA_000681895.1_ASM68189v1	2	NOT_FOUND	IC2
GCA_000681915.1_ASM68191v1	ND	NOT_FOUND	NOIC
GCA_000681935.1_ASM68193v1	2	NOT_FOUND	IC2
GCA_000681955.1_ASM68195v1	2	NOT_FOUND	IC2
GCA_000681975.1_ASM68197v1	2	NOT_FOUND	IC2
GCA_000681995.1_ASM68199v1	2	NOT_FOUND	IC2
GCA_000682015.1_ASM68201v1	500	NOT_FOUND	IC3
GCA_000682035.1_ASM68203v1	500	NOT_FOUND	IC3
GCA_000682055.1_ASM68205v1	514	NOT_FOUND	NOIC
GCA_000682075.1_ASM68207v1	2	NOT_FOUND	IC2
GCA_000682095.1_ASM68209v1	501	NOT_FOUND	NOIC
GCA_000682115.1_ASM68211v1	2	NOT_FOUND	IC2
GCA_000682135.1_ASM68213v1	2	NOT_FOUND	IC2
GCA_000682175.1_ASM68217v1	2	NOT_FOUND	IC2
GCA_000682195.1_ASM68219v1	2	OXA-115	IC2
GCA_000682215.1_ASM68221v1	499	NOT_FOUND	NOIC
GCA_000682235.1_ASM68223v1	2	NOT_FOUND	IC2
GCA_000682255.1_ASM68225v1	499	NOT_FOUND	NOIC
GCA_000682275.1_ASM68227v1	514	NOT_FOUND	NOIC
GCA_000682295.1_ASM68229v1	ND	NOT_FOUND	NOIC
GCA_000682315.1_ASM68231v1	ND	OXA-115	NOIC
GCA_000682335.1_ASM68233v1	71	NOT_FOUND	NOIC
GCA_000682375.1_ASM68237v1	499	NOT_FOUND	NOIC
GCA_000682395.1_ASM68239v1	ND	NOT_FOUND	NOIC
GCA_000682415.1_ASM68241v1	56	NOT_FOUND	NOIC
GCA_000682435.1_ASM68243v1	126	NOT_FOUND	NOIC
GCA_000682455.1_ASM68245v1	ND	NOT_FOUND	NOIC
GCA_000682475.1_ASM68247v1	10	NOT_FOUND	IC8
GCA_000682495.1_ASM68249v1	2	NOT_FOUND	IC2
GCA_000682515.1_ASM68251v1	ND	NOT_FOUND	NOIC
GCA_000682535.1_ASM68253v1	668	NOT_FOUND	NOIC
GCA_000682555.1_ASM68255v1	2	NOT_FOUND	IC2
GCA_000682575.1_ASM68257v1	2	NOT_FOUND	IC2
GCA_000682595.1_ASM68259v1	664	NOT_FOUND	IC2
GCA_000682635.1_ASM68263v1	415	OXA-115	NOIC
GCA_000682655.1_ASM68265v1	2	NOT_FOUND	IC2
GCA_000692095.1_Acin_baum_BIDMC_56_V1	2	NOT_FOUND	IC2
GCA_000695855.3_ASM69585v3	2	NOT_FOUND	IC2
GCA_000708775.1_ASM70877v1	499	NOT_FOUND	NOIC
GCA_000708795.1_ABU310	499	NOT_FOUND	NOIC
GCA_000722965.1_Acinetobacter_baumannii_Genome_sequencing	40	NOT_FOUND	NOIC
GCA_000722975.1_Acinetobacter_baumannii_Genome_sequencing	40	NOT_FOUND	NOIC
GCA_000722985.1_Acinetobacter_baumannii_Genome_sequencing	2	NOT_FOUND	IC2
GCA_000723045.1_Acinetobacter_baumannii_Genome_sequencing	2	NOT_FOUND	IC2
GCA_000723055.1_Acinetobacter_baumannii_Genome_sequencing	ND	NOT_FOUND	NOIC
GCA_000723065.1_Acinetobacter_baumannii_Genome_sequencing	2	NOT_FOUND	IC2
GCA_000723075.1_Acinetobacter_baumannii_Genome_sequencing	2	NOT_FOUND	IC2
GCA_000723125.1_Acinetobacter_baumannii_Genome_sequencing	2	NOT_FOUND	IC2
GCA_000723145.1_Acinetobacter_baumannii_Genome_sequencing	2	NOT_FOUND	IC2
GCA_000731965.1_ASM73196v1	621	NOT_FOUND	NOIC
GCA_000731975.1_ASM73197v1	94	NOT_FOUND	IC1
GCA_000734775.1_ASM73477v1	2	NOT_FOUND	IC2
GCA_000737145.1_ASM73714v1	52	NOT_FOUND	NOIC
GCA_000738845.1_ASM73884v1	499	NOT_FOUND	NOIC
GCA_000746605.1_ASM74660v1	638	NOT_FOUND	NOIC
GCA_000746645.1_ASM74664v1	79	NOT_FOUND	IC5
GCA_000750855.1_600_CLC	94	NOT_FOUND	IC1
GCA_000757665.1_ASM75766v1	79	NOT_FOUND	IC5
GCA_000759395.1_ASM75939v1	271	NOT_FOUND	NOIC
GCA_000760395.1_ASM76039v1	40	NOT_FOUND	NOIC
GCA_000760415.1_ASM76041v1	40	NOT_FOUND	NOIC
GCA_000760435.1_ASM76043v1	52	NOT_FOUND	NOIC
GCA_000760455.1_ASM76045v1	40	NOT_FOUND	NOIC
GCA_000760475.1_ASM76047v1	52	NOT_FOUND	NOIC
GCA_000761175.1_ASM76117v1	79	NOT_FOUND	IC5
GCA_000761465.1_ASM76146v1	2	NOT_FOUND	IC2
GCA_000763365.1_ASM76336v1	ND	NOT_FOUND	NOIC
GCA_000766105.1_ASM76610v1	2	NOT_FOUND	IC2
GCA_000770605.1_gabab5075v1.0	1	NOT_FOUND	IC1
GCA_000770785.1_ASM77078v1	ND	NOT_FOUND	NOIC
GCA_000770805.1_ASM77080v1	40	NOT_FOUND	NOIC
GCA_000770815.1_ASM77081v1	2	NOT_FOUND	IC2
GCA_000770865.1_ASM77086v1	ND	NOT_FOUND	NOIC
GCA_000770885.1_ASM77088v1	2	NOT_FOUND	IC2
GCA_000770905.1_ASM77090v1	2	NOT_FOUND	IC2
GCA_000775835.1_ASM77583v1	52	NOT_FOUND	NOIC
GCA_000775855.1_ASM77585v1	52	NOT_FOUND	NOIC
GCA_000775875.1_ASM77587v1	40	NOT_FOUND	NOIC
GCA_000784715.1_ASM78471v1	ND	NOT_FOUND	NOIC
GCA_000786735.1_ASM78673v1	10	NOT_FOUND	IC8
GCA_000787015.1_ASM78701v1	119	NOT_FOUND	NOIC
GCA_000787215.1_ASM78721v1	2	NOT_FOUND	IC2
GCA_000787225.1_ASM78722v1	2	NOT_FOUND	IC2
GCA_000787235.1_ASM78723v1	2	NOT_FOUND	IC2
GCA_000787275.1_ASM78727v1	40	NOT_FOUND	NOIC
GCA_000787295.1_ASM78729v1	2	NOT_FOUND	IC2
GCA_000787315.1_ASM78731v1	2	NOT_FOUND	IC2
GCA_000787335.1_ASM78733v1	2	NOT_FOUND	IC2
GCA_000787355.1_ASM78735v1	2	NOT_FOUND	IC2
GCA_000794125.2_ASM79412v2	1	NOT_FOUND	IC1
GCA_000802885.1_ASM80288v1	2	NOT_FOUND	IC2
GCA_000802895.1_ASM80289v1	2	NOT_FOUND	IC2
GCA_000802915.1_ASM80291v1	10	NOT_FOUND	IC8
GCA_000804635.1_ASM80463v1	2	NOT_FOUND	IC2
GCA_000804645.1_ASM80464v1	2	NOT_FOUND	IC2
GCA_000804655.1_ASM80465v1	2	NOT_FOUND	IC2
GCA_000804665.1_ASM80466v1	2	NOT_FOUND	IC2
GCA_000804715.1_ASM80471v1	2	NOT_FOUND	IC2
GCA_000804725.1_ASM80472v1	2	NOT_FOUND	IC2
GCA_000804735.1_ASM80473v1	2	NOT_FOUND	IC2
GCA_000804745.1_ASM80474v1	2	NOT_FOUND	IC2
GCA_000804795.1_ASM80479v1	2	NOT_FOUND	IC2
GCA_000804805.1_ASM80480v1	2	NOT_FOUND	IC2
GCA_000804815.1_ASM80481v1	2	NOT_FOUND	IC2
GCA_000804825.1_ASM80482v1	2	NOT_FOUND	IC2
GCA_000804875.1_ASM80487v1	2	NOT_FOUND	IC2
GCA_000804885.1_ASM80488v1	2	NOT_FOUND	IC2
GCA_000804895.1_ASM80489v1	2	NOT_FOUND	IC2
GCA_000804905.1_ASM80490v1	2	NOT_FOUND	IC2
GCA_000804955.1_ASM80495v1	23	NOT_FOUND	IC8
GCA_000804965.1_ASM80496v1	23	NOT_FOUND	IC8
GCA_000804975.1_ASM80497v1	2	NOT_FOUND	IC2
GCA_000804985.1_ASM80498v1	2	NOT_FOUND	IC2
GCA_000805035.1_ASM80503v1	2	NOT_FOUND	IC2
GCA_000805045.1_ASM80504v1	23	NOT_FOUND	IC8
GCA_000805055.1_ASM80505v1	2	NOT_FOUND	IC2
GCA_000805065.1_ASM80506v1	1554	NOT_FOUND	NOIC
GCA_000805115.1_ASM80511v1	2	NOT_FOUND	IC2
GCA_000805125.1_ASM80512v1	2	NOT_FOUND	IC2
GCA_000805135.1_ASM80513v1	105	NOT_FOUND	NOIC
GCA_000805145.1_ASM80514v1	ND	NOT_FOUND	NOIC
GCA_000805195.1_ASM80519v1	2	NOT_FOUND	IC2
GCA_000805205.1_ASM80520v1	2	NOT_FOUND	IC2
GCA_000805215.1_ASM80521v1	10	NOT_FOUND	IC8
GCA_000805225.1_ASM80522v1	2	NOT_FOUND	IC2
GCA_000805275.1_ASM80527v1	2	NOT_FOUND	IC2
GCA_000805295.1_ASM80529v1	2	NOT_FOUND	IC2
GCA_000805305.1_ASM80530v1	2	NOT_FOUND	IC2
GCA_000805365.1_ASM80536v1	1184	NOT_FOUND	NOIC
GCA_000805515.1_ASM80551v1	215	NOT_FOUND	NOIC
GCA_000805525.1_ASM80552v1	2	NOT_FOUND	IC2
GCA_000805535.1_ASM80553v1	653	NOT_FOUND	NOIC
GCA_000805545.1_ASM80554v1	2	NOT_FOUND	IC2
GCA_000805595.1_ASM80559v1	2	NOT_FOUND	IC2
GCA_000805615.1_ASM80561v1	2	NOT_FOUND	IC2
GCA_000805635.1_ASM80563v1	2	NOT_FOUND	IC2
GCA_000808765.3_Velvet_assembly_of_Acinetobacter_baumannii_ABUH42783	2	OXA-66	IC2
GCA_000808775.3_Velvet_assembly_of_Acinetobacter_baumannii_ABUH504227	2	NOT_FOUND	IC2
GCA_000808785.3_Velvet_assembly_of_Acinetobacter_baumannii_ABUH4837	2	NOT_FOUND	IC2
GCA_000808815.3_Velvet_assembly_of_Acinetobacter_baumannii_ABUH60486	2	NOT_FOUND	IC2
GCA_000808845.3_Velvet_assembly_of_Acinetobacter_baumannii_ABUH319118	2	NOT_FOUND	IC2
GCA_000808885.3_Velvet_assembly_of_Acinetobacter_baumannii_ABUH497144	2	NOT_FOUND	IC2
GCA_000808905.3_Velvet_assembly_of_Acinetobacter_baumannii_ABUH504238	2	NOT_FOUND	IC2
GCA_000808925.3_Velvet_assembly_of_Acinetobacter_baumannii_ABUH80286	2	NOT_FOUND	IC2
GCA_000808945.3_Velvet_assembly_of_Acinetobacter_baumannii_ABUH518307	2	NOT_FOUND	IC2
GCA_000808985.3_Velvet_assembly_of_Acinetobacter_baumannii_ABUH463346	2	NOT_FOUND	IC2
GCA_000809005.3_Velvet_assembly_of_Acinetobacter_baumannii_ABUH304350	2	NOT_FOUND	IC2
GCA_000809045.3_Velvet_assembly_of_Acinetobacter_baumannii_ABUH304352	2	NOT_FOUND	IC2
GCA_000809065.3_Velvet_assembly_of_Acinetobacter_baumannii_ABUH524354	2	NOT_FOUND	IC2
GCA_000809085.3_Velvet_assembly_of_Acinetobacter_baumannii_ABUH404571	2	NOT_FOUND	IC2
GCA_000809205.3_ASM80920v3	2	NOT_FOUND	IC2
GCA_000809215.3_ASM80921v3	2	NOT_FOUND	IC2
GCA_000809225.3_ASM80922v3	2	NOT_FOUND	IC2
GCA_000809235.3_ASM80923v3	2	NOT_FOUND	IC2
GCA_000809285.3_ASM80928v3	2	NOT_FOUND	IC2
GCA_000809305.3_ASM80930v3	2	NOT_FOUND	IC2
GCA_000809325.3_ASM80932v3	2	NOT_FOUND	IC2
GCA_000809345.3_ASM80934v3	2	NOT_FOUND	IC2
GCA_000809365.3_ASM80936v3	2	NOT_FOUND	IC2
GCA_000809385.3_ASM80938v3	2	NOT_FOUND	IC2
GCA_000809405.3_ASM80940v3	2	NOT_FOUND	IC2
GCA_000809425.3_ASM80942v3	2	NOT_FOUND	IC2
GCA_000809445.3_ASM80944v3	2	NOT_FOUND	IC2
GCA_000809465.3_ASM80946v3	2	NOT_FOUND	IC2
GCA_000809485.3_ASM80948v3	2	NOT_FOUND	IC2
GCA_000809505.3_ASM80950v3	78	NOT_FOUND	IC6
GCA_000809525.3_ASM80952v3	2	NOT_FOUND	IC2
GCA_000809545.3_ASM80954v3	2	NOT_FOUND	IC2
GCA_000809565.3_ASM80956v3	2	NOT_FOUND	IC2
GCA_000809585.3_ASM80958v3	2	NOT_FOUND	IC2
GCA_000809605.3_ASM80960v3	2	NOT_FOUND	IC2
GCA_000809625.3_ASM80962v3	2	NOT_FOUND	IC2
GCA_000809645.3_ASM80964v3	2	NOT_FOUND	IC2
GCA_000809665.3_ASM80966v3	2	NOT_FOUND	IC2
GCA_000809685.3_ASM80968v3	2	NOT_FOUND	IC2
GCA_000809705.3_ASM80970v3	2	NOT_FOUND	IC2
GCA_000809725.3_ASM80972v3	2	NOT_FOUND	IC2
GCA_000809745.3_ASM80974v3	2	NOT_FOUND	IC2
GCA_000809765.3_ASM80976v3	2	NOT_FOUND	IC2
GCA_000809785.3_ASM80978v3	2	NOT_FOUND	IC2
GCA_000809805.3_ASM80980v3	2	NOT_FOUND	IC2
GCA_000809825.3_ASM80982v3	2	NOT_FOUND	IC2
GCA_000809845.3_ASM80984v3	79	NOT_FOUND	IC5
GCA_000809865.3_ASM80986v3	79	NOT_FOUND	IC5
GCA_000809885.3_ASM80988v3	2	OXA-66	IC2
GCA_000809905.3_ASM80990v3	79	NOT_FOUND	IC5
GCA_000809925.3_ASM80992v3	1088	NOT_FOUND	NOIC
GCA_000809945.3_ASM80994v3	2	OXA-66	IC2
GCA_000809965.3_ASM80996v3	1088	NOT_FOUND	NOIC
GCA_000809985.3_ASM80998v3	2	NOT_FOUND	IC2
GCA_000810005.3_ASM81000v3	1088	NOT_FOUND	NOIC
GCA_000810025.3_ASM81002v3	2	NOT_FOUND	IC2
GCA_000810045.3_ASM81004v3	2	NOT_FOUND	IC2
GCA_000810065.3_ASM81006v3	2	NOT_FOUND	IC2
GCA_000810085.3_ASM81008v3	2	NOT_FOUND	IC2
GCA_000810125.3_ASM81012v3	ND	NOT_FOUND	NOIC
GCA_000810145.3_ASM81014v3	2	NOT_FOUND	IC2
GCA_000810165.3_ASM81016v3	2	NOT_FOUND	IC2
GCA_000810185.3_ASM81018v3	2	NOT_FOUND	IC2
GCA_000810205.3_Velvet_assembly_of_Acinetobacter_baumannii_UH514_287	2	NOT_FOUND	IC2
GCA_000810245.3_ASM81024v3	2	NOT_FOUND	IC2
GCA_000810265.3_ASM81026v3	2	NOT_FOUND	IC2
GCA_000810285.3_ASM81028v3	2	NOT_FOUND	IC2
GCA_000810305.3_ASM81030v3	2	NOT_FOUND	IC2
GCA_000810325.3_ASM81032v3	2	NOT_FOUND	IC2
GCA_000810345.3_ASM81034v3	2	NOT_FOUND	IC2
GCA_000810365.3_ASM81036v3	2	NOT_FOUND	IC2
GCA_000810385.3_ASM81038v3	2	NOT_FOUND	IC2
GCA_000810405.3_ASM81040v3	2	NOT_FOUND	IC2
GCA_000810425.3_ASM81042v3	2	NOT_FOUND	IC2
GCA_000810445.3_ASM81044v3	2	NOT_FOUND	IC2
GCA_000810465.3_ASM81046v3	2	NOT_FOUND	IC2
GCA_000810485.3_ASM81048v3	2	NOT_FOUND	IC2
GCA_000810505.3_ASM81050v3	2	NOT_FOUND	IC2
GCA_000810525.3_ASM81052v3	2	NOT_FOUND	IC2
GCA_000810545.3_ASM81054v3	2	NOT_FOUND	IC2
GCA_000810565.3_ASM81056v3	2	NOT_FOUND	IC2
GCA_000810585.3_ASM81058v3	2	NOT_FOUND	IC2
GCA_000810605.3_ASM81060v3	2	NOT_FOUND	IC2
GCA_000810625.3_ASM81062v3	2	OXA-66	IC2
GCA_000810645.3_ASM81064v3	2	NOT_FOUND	IC2
GCA_000810665.3_ASM81066v3	2	NOT_FOUND	IC2
GCA_000810685.3_ASM81068v3	2	NOT_FOUND	IC2
GCA_000810725.3_ASM81072v3	2	NOT_FOUND	IC2
GCA_000810745.3_ASM81074v3	2	NOT_FOUND	IC2
GCA_000810765.3_ASM81076v3	2	NOT_FOUND	IC2
GCA_000810825.3_ASM81082v3	2	NOT_FOUND	IC2
GCA_000810835.3_ASM81083v3	2	NOT_FOUND	IC2
GCA_000810865.3_ASM81086v3	2	NOT_FOUND	IC2
GCA_000810875.3_ASM81087v3	2	NOT_FOUND	IC2
GCA_000810905.3_ASM81090v3	2	NOT_FOUND	IC2
GCA_000810915.3_ASM81091v3	2	NOT_FOUND	IC2
GCA_000810935.3_ASM81093v3	2	NOT_FOUND	IC2
GCA_000810945.3_ASM81094v3	2	NOT_FOUND	IC2
GCA_000810985.3_ASM81098v3	2	NOT_FOUND	IC2
GCA_000810995.3_ASM81099v3	250	NOT_FOUND	NOIC
GCA_000811005.3_ASM81100v3	2	NOT_FOUND	IC2
GCA_000811015.3_ASM81101v3	2	NOT_FOUND	IC2
GCA_000811065.3_ASM81106v3	2	NOT_FOUND	IC2
GCA_000811085.3_ASM81108v3	2	NOT_FOUND	IC2
GCA_000811105.3_ASM81110v3	2	NOT_FOUND	IC2
GCA_000811145.3_ASM81114v3	2	NOT_FOUND	IC2
GCA_000811165.3_ASM81116v3	2	NOT_FOUND	IC2
GCA_000811185.3_ASM81118v3	2	NOT_FOUND	IC2
GCA_000811205.3_ASM81120v3	2	NOT_FOUND	IC2
GCA_000811225.3_ASM81122v3	2	NOT_FOUND	IC2
GCA_000811245.3_ASM81124v3	2	NOT_FOUND	IC2
GCA_000811265.3_ASM81126v3	2	NOT_FOUND	IC2
GCA_000811285.3_ASM81128v3	2	NOT_FOUND	IC2
GCA_000811305.3_ASM81130v3	2	NOT_FOUND	IC2
GCA_000811325.3_ASM81132v3	2	NOT_FOUND	IC2
GCA_000811345.3_ASM81134v3	2	NOT_FOUND	IC2
GCA_000811365.3_ASM81136v3	2	NOT_FOUND	IC2
GCA_000811405.3_ASM81140v3	2	NOT_FOUND	IC2
GCA_000811485.3_ASM81148v3	2	NOT_FOUND	IC2
GCA_000811505.3_ASM81150v3	2	NOT_FOUND	IC2
GCA_000811525.3_ASM81152v3	2	NOT_FOUND	IC2
GCA_000811545.3_ASM81154v3	2	NOT_FOUND	IC2
GCA_000811565.3_ASM81156v3	2	NOT_FOUND	IC2
GCA_000811585.3_ASM81158v3	2	NOT_FOUND	IC2
GCA_000811605.3_ASM81160v3	2	NOT_FOUND	IC2
GCA_000811625.3_ASM81162v3	2	NOT_FOUND	IC2
GCA_000811645.3_ASM81164v3	2	NOT_FOUND	IC2
GCA_000811665.3_ASM81166v3	2	NOT_FOUND	IC2
GCA_000811685.3_ASM81168v3	2	NOT_FOUND	IC2
GCA_000811705.3_ASM81170v3	2	NOT_FOUND	IC2
GCA_000811725.3_ASM81172v3	2	NOT_FOUND	IC2
GCA_000811745.3_ASM81174v3	2	NOT_FOUND	IC2
GCA_000811765.3_ASM81176v3	2	NOT_FOUND	IC2
GCA_000811785.3_ASM81178v3	2	NOT_FOUND	IC2
GCA_000811805.3_ASM81180v3	10	NOT_FOUND	IC8
GCA_000811825.3_ASM81182v3	2	NOT_FOUND	IC2
GCA_000811865.3_ASM81186v3	2	NOT_FOUND	IC2
GCA_000811885.3_ASM81188v3	1088	NOT_FOUND	NOIC
GCA_000811905.3_ASM81190v3	2	NOT_FOUND	IC2
GCA_000811925.3_ASM81192v3	2	NOT_FOUND	IC2
GCA_000811945.3_ASM81194v3	2	NOT_FOUND	IC2
GCA_000814345.1_ASM81434v1	464	NOT_FOUND	IC9
GCA_000820665.1_CLCgenomics	2	NOT_FOUND	IC2
GCA_000820685.1_CLCgenomics	2	NOT_FOUND	IC2
GCA_000828795.1_ASM82879v1	2	NOT_FOUND	IC2
GCA_000828935.1_ASM82893v1	622	NOT_FOUND	NOIC
GCA_000830055.1_ASM83005v1	1	NOT_FOUND	IC1
GCA_000835995.1_ASM83599v1	ND	NOT_FOUND	NOIC
GCA_000836075.1_ASM83607v1	52	NOT_FOUND	NOIC
GCA_000836625.1_ASM83662v1	1	NOT_FOUND	IC1
GCA_000876055.1_ASM87605v1	40	NOT_FOUND	NOIC
GCA_000876075.1_ASM87607v1	34	NOT_FOUND	NOIC
GCA_000876095.1_ASM87609v1	52	NOT_FOUND	NOIC
GCA_000876445.1_ASM87644v1	250	NOT_FOUND	NOIC
GCA_000931755.1_ASM93175v1	52	NOT_FOUND	NOIC
GCA_000939395.2_ASM93939v2	2	NOT_FOUND	IC2
GCA_000939405.2_ASM93940v2	2	NOT_FOUND	IC2
GCA_000939415.2_HGAP_assembly_of_Acinetobacter_baumannii_ORAB01	2	NOT_FOUND	IC2
GCA_000939425.2_ASM93942v2	2	NOT_FOUND	IC2
GCA_000939475.2_ASM93947v2	2	NOT_FOUND	IC2
GCA_000939485.2_ASM93948v2	2	NOT_FOUND	IC2
GCA_000939495.2_ASM93949v2	2	NOT_FOUND	IC2
GCA_000939535.2_ASM93953v2	2	NOT_FOUND	IC2
GCA_000939555.2_ASM93955v2	2	NOT_FOUND	IC2
GCA_000939565.2_ASM93956v2	2	NOT_FOUND	IC2
GCA_000939575.2_ASM93957v2	2	NOT_FOUND	IC2
GCA_000939615.2_ASM93961v2	2	NOT_FOUND	IC2
GCA_000939635.2_ASM93963v2	2	NOT_FOUND	IC2
GCA_000949035.2_ASM94903v2	2	NOT_FOUND	IC2
GCA_000949045.2_ASM94904v2	2	NOT_FOUND	IC2
GCA_000949055.2_ASM94905v2	2	NOT_FOUND	IC2
GCA_000949065.2_ASM94906v2	2	NOT_FOUND	IC2
GCA_000949115.2_ASM94911v2	2	NOT_FOUND	IC2
GCA_000949165.2_ASM94916v2	250	NOT_FOUND	NOIC
GCA_000949175.2_ASM94917v2	2	NOT_FOUND	IC2
GCA_000949185.2_ASM94918v2	250	NOT_FOUND	NOIC
GCA_000949195.2_ASM94919v2	2	NOT_FOUND	IC2
GCA_000951165.1_ASM95116v1	ND	NOT_FOUND	NOIC
GCA_000963815.1_ASM96381v1	1	NOT_FOUND	IC1
GCA_000966305.1_ASM96630v1	ND	NOT_FOUND	NOIC
GCA_000966495.1_ASM96649v1	2	NOT_FOUND	IC2
GCA_000966505.1_ASM96650v1	16	NOT_FOUND	NOIC
GCA_000966515.1_ASM96651v1	2	NOT_FOUND	IC2
GCA_000966525.1_ASM96652v1	2	NOT_FOUND	IC2
GCA_000968965.1_ASM96896v1	215	OXA-66	NOIC
GCA_000969285.1_ASM96928v1	2	NOT_FOUND	IC2
GCA_000969295.1_ASM96929v1	ND	NOT_FOUND	NOIC
GCA_000969365.1_ASM96936v1	2	NOT_FOUND	IC2
GCA_000969385.1_ASM96938v1	1	NOT_FOUND	IC1
GCA_000969465.1_ASM96946v1	ND	NOT_FOUND	NOIC
GCA_000969485.1_ASM96948v1	654	NOT_FOUND	NOIC
GCA_000972525.1_ASM97252v1	10	NOT_FOUND	IC8
GCA_000972625.1_ASM97262v1	10	NOT_FOUND	IC8
GCA_000981405.1_ASM98140v1	2	NOT_FOUND	IC2
GCA_000988155.1_ASM98815v1	15	NOT_FOUND	IC4
GCA_001007685.1_ASM100768v1	402	NOT_FOUND	NOIC
GCA_001007705.1_ASM100770v1	25	NOT_FOUND	IC7
GCA_001007725.1_ASM100772v1	25	NOT_FOUND	IC7
GCA_001007745.1_ASM100774v1	25	NOT_FOUND	IC7
GCA_001007765.1_ASM100776v1	25	NOT_FOUND	IC7
GCA_001007775.1_ASM100777v1	25	NOT_FOUND	IC7
GCA_001007815.1_ASM100781v1	25	NOT_FOUND	IC7
GCA_001008125.1_ASM100812v1	2	NOT_FOUND	IC2
GCA_001026965.1_ASM102696v1	2	NOT_FOUND	IC2
GCA_001027885.1_gdodcwi07_v01	2	NOT_FOUND	IC2
GCA_001028265.1_gdodcwi06_v01	1	NOT_FOUND	IC1
GCA_001028305.1_gdodcwi04_v01	94	NOT_FOUND	IC1
GCA_001028315.1_gdodcwi05_v01	1	NOT_FOUND	IC1
GCA_001028325.1_gdodcwi02_v01	81	NOT_FOUND	IC1
GCA_001028335.1_gdodcwi03_v01	94	NOT_FOUND	IC1
GCA_001028385.1_gdodcwi01_v01	94	NOT_FOUND	IC1
GCA_001052015.1_ASM105201v1	2	NOT_FOUND	IC2
GCA_001052325.1_ASM105232v1	2	NOT_FOUND	IC2
GCA_001052675.1_ASM105267v1	2	NOT_FOUND	IC2
GCA_001052775.1_ASM105277v1	2	NOT_FOUND	IC2
GCA_001053695.1_ASM105369v1	2	NOT_FOUND	IC2
GCA_001053755.1_ASM105375v1	1426	NOT_FOUND	NOIC
GCA_001055965.1_ASM105596v1	1140	NOT_FOUND	NOIC
GCA_001059495.1_ASM105949v1	2	NOT_FOUND	IC2
GCA_001077555.2_ASM107755v2	1545	NOT_FOUND	NOIC
GCA_001077565.2_ASM107756v2	149	NOT_FOUND	NOIC
GCA_001077575.1_ASM107757v1	ND	NOT_FOUND	NOIC
GCA_001077655.1_ASM107765v1	10	NOT_FOUND	IC8
GCA_001077675.1_ASM107767v1	437	NOT_FOUND	NOIC
GCA_001077965.2_ASM107796v2	1549	NOT_FOUND	NOIC
GCA_001261895.2_R2090	267	NOT_FOUND	NOIC
GCA_001276055.1_ASM127605v1	2	NOT_FOUND	IC2
GCA_001276085.1_ASM127608v1	10	NOT_FOUND	IC8
GCA_001292715.1_ASM129271v1	2	NOT_FOUND	IC2
GCA_001373535.1_Acinetobacter_baumannii_CHI-45-1	1	NOT_FOUND	IC1
GCA_001373575.1_A._baumannii_CHI-34	1	NOT_FOUND	IC1
GCA_001399655.1_ASM139965v1	81	NOT_FOUND	IC1
GCA_001400975.1_ASM140097v1	492	NOT_FOUND	IC2
GCA_001414565.1_ASM141456v1	79	NOT_FOUND	IC5
GCA_001414575.1_ASM141457v1	ND	NOT_FOUND	NOIC
GCA_001414645.1_ASM141464v1	ND	NOT_FOUND	NOIC
GCA_001414655.1_ASM141465v1	406	NOT_FOUND	NOIC
GCA_001414685.1_ASM141468v1	ND	NOT_FOUND	NOIC
GCA_001414735.1_ASM141473v1	79	NOT_FOUND	IC5
GCA_001414765.1_ASM141476v1	ND	NOT_FOUND	NOIC
GCA_001414785.1_ASM141478v1	79	NOT_FOUND	IC5
GCA_001414805.1_ASM141480v1	79	NOT_FOUND	IC5
GCA_001414815.1_ASM141481v1	ND	NOT_FOUND	NOIC
GCA_001414865.1_ASM141486v1	2	NOT_FOUND	IC2
GCA_001414885.1_ASM141488v1	ND	NOT_FOUND	NOIC
GCA_001414905.1_ASM141490v1	79	NOT_FOUND	IC5
GCA_001414915.1_ASM141491v1	498	NOT_FOUND	NOIC
GCA_001414925.1_ASM141492v1	ND	NOT_FOUND	NOIC
GCA_001414935.1_ASM141493v1	79	NOT_FOUND	IC5
GCA_001414985.1_ASM141498v1	ND	NOT_FOUND	NOIC
GCA_001414995.1_ASM141499v1	ND	NOT_FOUND	NOIC
GCA_001415015.1_ASM141501v1	79	NOT_FOUND	IC5
GCA_001415025.1_ASM141502v1	ND	NOT_FOUND	NOIC
GCA_001415065.1_ASM141506v1	49	NOT_FOUND	NOIC
GCA_001415085.1_ASM141508v1	ND	NOT_FOUND	NOIC
GCA_001415095.1_ASM141509v1	2	NOT_FOUND	IC2
GCA_001415165.1_ASM141516v1	406	NOT_FOUND	NOIC
GCA_001415215.1_ASM141521v1	ND	NOT_FOUND	NOIC
GCA_001415255.1_ASM141525v1	ND	NOT_FOUND	NOIC
GCA_001415275.1_ASM141527v1	ND	NOT_FOUND	NOIC
GCA_001415295.1_ASM141529v1	79	NOT_FOUND	IC5
GCA_001415325.1_ASM141532v1	79	NOT_FOUND	IC5
GCA_001415345.1_ASM141534v1	79	NOT_FOUND	IC5
GCA_001415355.1_ASM141535v1	79	NOT_FOUND	IC5
GCA_001415385.1_ASM141538v1	79	NOT_FOUND	IC5
GCA_001415425.1_ASM141542v1	ND	NOT_FOUND	NOIC
GCA_001415435.1_ASM141543v1	103	NOT_FOUND	NOIC
GCA_001415465.1_ASM141546v1	ND	NOT_FOUND	NOIC
GCA_001415505.1_ASM141550v1	499	NOT_FOUND	NOIC
GCA_001415515.1_ASM141551v1	499	NOT_FOUND	NOIC
GCA_001415535.1_ASM141553v1	ND	NOT_FOUND	NOIC
GCA_001415595.1_ASM141559v1	79	NOT_FOUND	IC5
GCA_001415615.1_ASM141561v1	499	NOT_FOUND	NOIC
GCA_001415645.1_ASM141564v1	2	NOT_FOUND	IC2
GCA_001415665.1_ASM141566v1	ND	NOT_FOUND	NOIC
GCA_001415695.1_ASM141569v1	2	NOT_FOUND	IC2
GCA_001415715.1_ASM141571v1	ND	NOT_FOUND	NOIC
GCA_001415735.1_ASM141573v1	ND	NOT_FOUND	NOIC
GCA_001415765.1_ASM141576v1	ND	NOT_FOUND	NOIC
GCA_001415785.1_ASM141578v1	ND	NOT_FOUND	NOIC
GCA_001415805.1_ASM141580v1	406	NOT_FOUND	NOIC
GCA_001415815.1_ASM141581v1	ND	NOT_FOUND	NOIC
GCA_001415835.1_ASM141583v1	ND	NOT_FOUND	NOIC
GCA_001415875.1_ASM141587v1	79	NOT_FOUND	IC5
GCA_001415915.1_ASM141591v1	ND	NOT_FOUND	NOIC
GCA_001415965.1_ASM141596v1	ND	NOT_FOUND	NOIC
GCA_001415985.1_ASM141598v1	406	NOT_FOUND	NOIC
GCA_001416005.1_ASM141600v1	ND	NOT_FOUND	NOIC
GCA_001416015.1_ASM141601v1	ND	NOT_FOUND	NOIC
GCA_001416035.1_ASM141603v1	ND	NOT_FOUND	NOIC
GCA_001416075.1_ASM141607v1	2	NOT_FOUND	IC2
GCA_001416095.1_ASM141609v1	2	NOT_FOUND	IC2
GCA_001416115.1_ASM141611v1	1337	NOT_FOUND	NOIC
GCA_001416145.1_ASM141614v1	499	NOT_FOUND	NOIC
GCA_001416155.1_ASM141615v1	499	NOT_FOUND	NOIC
GCA_001416165.1_ASM141616v1	ND	NOT_FOUND	NOIC
GCA_001416225.1_ASM141622v1	2	NOT_FOUND	IC2
GCA_001416235.1_ASM141623v1	406	NOT_FOUND	NOIC
GCA_001416255.1_ASM141625v1	ND	NOT_FOUND	NOIC
GCA_001416275.1_ASM141627v1	2	NOT_FOUND	IC2
GCA_001416305.1_ASM141630v1	499	NOT_FOUND	NOIC
GCA_001416315.1_ASM141631v1	ND	NOT_FOUND	NOIC
GCA_001416355.1_ASM141635v1	ND	NOT_FOUND	NOIC
GCA_001416385.1_ASM141638v1	ND	NOT_FOUND	NOIC
GCA_001416395.1_ASM141639v1	ND	NOT_FOUND	NOIC
GCA_001416415.1_ASM141641v1	ND	NOT_FOUND	NOIC
GCA_001416425.1_ASM141642v1	ND	NOT_FOUND	NOIC
GCA_001416465.1_ASM141646v1	ND	NOT_FOUND	NOIC
GCA_001416475.1_ASM141647v1	ND	NOT_FOUND	NOIC
GCA_001416495.1_ASM141649v1	ND	NOT_FOUND	NOIC
GCA_001416515.1_ASM141651v1	ND	NOT_FOUND	NOIC
GCA_001416545.1_ASM141654v1	406	NOT_FOUND	NOIC
GCA_001416555.1_ASM141655v1	ND	NOT_FOUND	NOIC
GCA_001416565.1_ASM141656v1	ND	NOT_FOUND	NOIC
GCA_001416585.1_ASM141658v1	406	NOT_FOUND	NOIC
GCA_001416625.1_ASM141662v1	250	NOT_FOUND	NOIC
GCA_001416635.1_ASM141663v1	ND	NOT_FOUND	NOIC
GCA_001416655.1_ASM141665v1	ND	NOT_FOUND	NOIC
GCA_001416665.1_ASM141666v1	ND	NOT_FOUND	NOIC
GCA_001416705.1_ASM141670v1	ND	NOT_FOUND	NOIC
GCA_001416715.1_ASM141671v1	79	NOT_FOUND	IC5
GCA_001417485.1_ASM141748v1	ND	NOT_FOUND	NOIC
GCA_001417495.1_ASM141749v1	ND	NOT_FOUND	NOIC
GCA_001417515.1_ASM141751v1	ND	NOT_FOUND	NOIC
GCA_001417545.1_ASM141754v1	ND	NOT_FOUND	NOIC
GCA_001420305.1_ASM142030v1	ND	OXA-65	NOIC
GCA_001420325.1_ASM142032v1	ND	NOT_FOUND	NOIC
GCA_001420335.1_ASM142033v1	ND	OXA-65	NOIC
GCA_001420385.1_ASM142038v1	79	OXA-65	IC5
GCA_001420405.1_ASM142040v1	15	OXA-51	IC4
GCA_001420505.1_ASM142050v1	2	NOT_FOUND	IC2
GCA_001420515.1_ASM142051v1	2	NOT_FOUND	IC2
GCA_001432265.1_ASM143226v1	85	NOT_FOUND	IC9
GCA_001432275.1_ASM143227v1	85	NOT_FOUND	IC9
GCA_001432375.1_ASM143237v1	406	NOT_FOUND	NOIC
GCA_001432385.1_ASM143238v1	79	NOT_FOUND	IC5
GCA_001432425.1_ASM143242v1	372	NOT_FOUND	NOIC
GCA_001432445.1_ASM143244v1	ND	NOT_FOUND	NOIC
GCA_001432455.1_ASM143245v1	6	NOT_FOUND	IC9
GCA_001432525.1_ASM143252v1	ND	NOT_FOUND	NOIC
GCA_001432535.1_ASM143253v1	ND	NOT_FOUND	NOIC
GCA_001432545.1_ASM143254v1	25	NOT_FOUND	IC7
GCA_001432585.1_ASM143258v1	ND	NOT_FOUND	NOIC
GCA_001432595.1_ASM143259v1	ND	NOT_FOUND	NOIC
GCA_001432625.1_ASM143262v1	79	NOT_FOUND	IC5
GCA_001432665.1_ASM143266v1	78	NOT_FOUND	IC6
GCA_001432685.1_ASM143268v1	1022	NOT_FOUND	NOIC
GCA_001432705.1_ASM143270v1	1022	NOT_FOUND	NOIC
GCA_001432745.1_ASM143274v1	497	NOT_FOUND	NOIC
GCA_001432755.1_ASM143275v1	2	NOT_FOUND	IC2
GCA_001432785.1_ASM143278v1	406	NOT_FOUND	NOIC
GCA_001432825.1_ASM143282v1	32	NOT_FOUND	NOIC
GCA_001432845.1_ASM143284v1	78	NOT_FOUND	IC6
GCA_001432865.1_ASM143286v1	406	OXA-172	NOIC
GCA_001432895.1_ASM143289v1	ND	NOT_FOUND	NOIC
GCA_001432925.1_ASM143292v1	ND	NOT_FOUND	NOIC
GCA_001432965.1_ASM143296v1	79	NOT_FOUND	IC5
GCA_001432975.1_ASM143297v1	79	NOT_FOUND	IC5
GCA_001433005.1_ASM143300v1	ND	NOT_FOUND	NOIC
GCA_001433015.1_ASM143301v1	ND	NOT_FOUND	NOIC
GCA_001433045.1_ASM143304v1	2	NOT_FOUND	IC2
GCA_001433055.1_ASM143305v1	ND	NOT_FOUND	NOIC
GCA_001433075.1_ASM143307v1	406	NOT_FOUND	NOIC
GCA_001433145.1_ASM143314v1	ND	NOT_FOUND	NOIC
GCA_001433155.1_ASM143315v1	ND	NOT_FOUND	NOIC
GCA_001433205.1_ASM143320v1	2	NOT_FOUND	IC2
GCA_001433245.1_ASM143324v1	79	NOT_FOUND	IC5
GCA_001433265.1_ASM143326v1	ND	NOT_FOUND	NOIC
GCA_001433275.1_ASM143327v1	79	NOT_FOUND	IC5
GCA_001433335.1_ASM143333v1	79	NOT_FOUND	IC5
GCA_001433355.1_ASM143335v1	ND	NOT_FOUND	NOIC
GCA_001433655.1_ASM143365v1	79	NOT_FOUND	IC5
GCA_001433675.1_ASM143367v1	2	NOT_FOUND	IC2
GCA_001433695.1_ASM143369v1	79	NOT_FOUND	IC5
GCA_001441355.1_ASM144135v1	10	NOT_FOUND	IC8
GCA_001441405.1_ASM144140v1	10	NOT_FOUND	IC8
GCA_001441415.1_ASM144141v1	10	NOT_FOUND	IC8
GCA_001441455.1_ASM144145v1	10	NOT_FOUND	IC8
GCA_001441465.1_ASM144146v1	10	NOT_FOUND	IC8
GCA_001441475.1_ASM144147v1	10	NOT_FOUND	IC8
GCA_001441485.1_ASM144148v1	10	NOT_FOUND	IC8
GCA_001441545.1_ASM144154v1	10	NOT_FOUND	IC8
GCA_001441555.1_ASM144155v1	10	NOT_FOUND	IC8
GCA_001441565.1_ASM144156v1	10	NOT_FOUND	IC8
GCA_001441625.1_ASM144162v1	10	NOT_FOUND	IC8
GCA_001441645.1_ASM144164v1	10	NOT_FOUND	IC8
GCA_001442575.1_ASM144257v1	2	NOT_FOUND	IC2
GCA_001443265.1_ASM144326v1	94	NOT_FOUND	IC1
GCA_001444215.1_ASM144421v1	94	NOT_FOUND	IC1
GCA_001444225.1_ASM144422v1	94	NOT_FOUND	IC1
GCA_001444255.1_ASM144425v1	94	NOT_FOUND	IC1
GCA_001444265.1_ASM144426v1	94	NOT_FOUND	IC1
GCA_001446715.1_ASM144671v1	742	NOT_FOUND	NOIC
GCA_001457535.1_CIP70.10	126	NOT_FOUND	NOIC
GCA_001471855.2_ASM147185v2	16	NOT_FOUND	NOIC
GCA_001500225.1_ASM150022v1	15	NOT_FOUND	IC4
GCA_001511855.1_9179_4_85	1	NOT_FOUND	IC1
GCA_001511875.1_9179_4_76	1	NOT_FOUND	IC1
GCA_001511895.1_9179_4_80	1	NOT_FOUND	IC1
GCA_001511915.1_7521_8_47	1	NOT_FOUND	IC1
GCA_001511935.1_7468_2_60	1	NOT_FOUND	IC1
GCA_001511955.1_7521_8_45	1	NOT_FOUND	IC1
GCA_001511975.1_7468_2_93	1	NOT_FOUND	IC1
GCA_001511995.1_7521_8_27	1	NOT_FOUND	IC1
GCA_001512015.1_7521_8_25	1	NOT_FOUND	IC1
GCA_001512035.1_7521_8_32	1	NOT_FOUND	IC1
GCA_001512055.1_7468_2_74	1	NOT_FOUND	IC1
GCA_001512075.1_7521_8_28	1	NOT_FOUND	IC1
GCA_001512095.1_7521_8_38	ND	NOT_FOUND	NOIC
GCA_001512115.1_9179_4_82	1	NOT_FOUND	IC1
GCA_001512135.1_7468_2_79	1	NOT_FOUND	IC1
GCA_001512155.1_7521_8_36	1	NOT_FOUND	IC1
GCA_001512175.1_7468_2_75	1	NOT_FOUND	IC1
GCA_001512195.1_7468_2_95	1	NOT_FOUND	IC1
GCA_001512215.1_9179_4_6	1	NOT_FOUND	IC1
GCA_001512235.1_7468_2_91	1	NOT_FOUND	IC1
GCA_001512255.1_7521_8_39	1	NOT_FOUND	IC1
GCA_001514375.1_ASM151437v1	2	NOT_FOUND	IC2
GCA_001516805.1_ASM151680v1	54	NOT_FOUND	NOIC
GCA_001517645.1_R2091	126	NOT_FOUND	NOIC
GCA_001518715.1_ASM151871v1	2	NOT_FOUND	IC2
GCA_001531135.1_ASM153113v1	79	NOT_FOUND	IC5
GCA_001531205.2_ASM153120v2	2	NOT_FOUND	IC2
GCA_001531265.2_ASM153126v2	79	NOT_FOUND	IC5
GCA_001531455.2_ASM153145v2	2	NOT_FOUND	IC2
GCA_001535665.1_ASM153566v1	ND	OXA-66	NOIC
GCA_001535685.1_ASM153568v1	2	OXA-66	IC2
GCA_001541025.2_ASM154102v2	2	NOT_FOUND	IC2
GCA_001541035.2_ASM154103v2	2	NOT_FOUND	IC2
GCA_001541045.2_ASM154104v2	2	NOT_FOUND	IC2
GCA_001541425.1_ASM154142v1	187	NOT_FOUND	IC2
GCA_001541455.1_ASM154145v1	745	NOT_FOUND	IC2
GCA_001541525.1_ASM154152v1	2	NOT_FOUND	IC2
GCA_001541685.1_ASM154168v1	ND	NOT_FOUND	NOIC
GCA_001541695.1_ASM154169v1	2	NOT_FOUND	IC2
GCA_001541705.1_ASM154170v1	187	NOT_FOUND	IC2
GCA_001541725.1_ASM154172v1	187	NOT_FOUND	IC2
GCA_001541765.1_ASM154176v1	187	NOT_FOUND	IC2
GCA_001541775.1_ASM154177v1	745	NOT_FOUND	IC2
GCA_001541795.1_ASM154179v1	187	NOT_FOUND	IC2
GCA_001541875.1_ASM154187v1	187	NOT_FOUND	IC2
GCA_001543995.1_ASM154399v1	2	NOT_FOUND	IC2
GCA_001544395.1_P630	126	NOT_FOUND	NOIC
GCA_001549575.1_ASM154957v1	1	NOT_FOUND	IC1
GCA_001573065.1_ASM157306v1	2	NOT_FOUND	IC2
GCA_001573085.1_ASM157308v1	2	NOT_FOUND	IC2
GCA_001573105.1_ASM157310v1	215	NOT_FOUND	NOIC
GCA_001573125.1_ASM157312v1	2	NOT_FOUND	IC2
GCA_001576615.1_ASM157661v1	2	NOT_FOUND	IC2
GCA_001578145.1_ASM157814v1	23	NOT_FOUND	IC8
GCA_001584465.1_ASM158446v1	1	OXA-69	IC1
GCA_001584475.1_ASM158447v1	2	OXA-66	IC2
GCA_001584485.1_ASM158448v1	2	OXA-66	IC2
GCA_001593425.2_ASM159342v2	437	NOT_FOUND	NOIC
GCA_001611995.1_ASM161199v1	25	NOT_FOUND	IC7
GCA_001612005.1_ASM161200v1	20	NOT_FOUND	IC1
GCA_001612015.1_ASM161201v1	3	NOT_FOUND	IC3
GCA_001612025.1_ASM161202v1	48	NOT_FOUND	NOIC
GCA_001612075.1_ASM161207v1	2	NOT_FOUND	IC2
GCA_001612095.1_ASM161209v1	25	NOT_FOUND	IC7
GCA_001612105.1_ASM161210v1	25	NOT_FOUND	IC7
GCA_001612115.1_ASM161211v1	717	NOT_FOUND	IC1
GCA_001612155.1_ASM161215v1	2	NOT_FOUND	IC2
GCA_001612175.1_ASM161217v1	2	NOT_FOUND	IC2
GCA_001612185.1_ASM161218v1	2	NOT_FOUND	IC2
GCA_001612215.1_ASM161221v1	3	NOT_FOUND	IC3
GCA_001612235.1_ASM161223v1	2	NOT_FOUND	IC2
GCA_001612255.1_ASM161225v1	1	NOT_FOUND	IC1
GCA_001612275.1_ASM161227v1	1	NOT_FOUND	IC1
GCA_001612285.1_ASM161228v1	2	NOT_FOUND	IC2
GCA_001612315.1_ASM161231v1	2	NOT_FOUND	IC2
GCA_001612335.1_ASM161233v1	2	NOT_FOUND	IC2
GCA_001612355.1_ASM161235v1	2	NOT_FOUND	IC2
GCA_001612365.1_ASM161236v1	2	NOT_FOUND	IC2
GCA_001612395.1_ASM161239v1	2	NOT_FOUND	IC2
GCA_001612415.1_ASM161241v1	1	NOT_FOUND	IC1
GCA_001612435.1_ASM161243v1	1	NOT_FOUND	IC1
GCA_001612455.1_ASM161245v1	1	NOT_FOUND	IC1
GCA_001617825.1_ASM161782v1	2	NOT_FOUND	IC2
GCA_001617835.1_ASM161783v1	2	NOT_FOUND	IC2
GCA_001617885.1_ASM161788v1	2	NOT_FOUND	IC2
GCA_001617895.1_ASM161789v1	2	NOT_FOUND	IC2
GCA_001617915.1_ASM161791v1	2	NOT_FOUND	IC2
GCA_001617945.1_ASM161794v1	2	NOT_FOUND	IC2
GCA_001618125.1_ASM161812v1	2	NOT_FOUND	IC2
GCA_001624975.1_ASM162497v1	2	NOT_FOUND	IC2
GCA_001628795.1_ASM162879v1	79	OXA-65	IC5
GCA_001636235.1_ASM163623v1	422	NOT_FOUND	IC5
GCA_001640065.1_ASM164006v1	604	NOT_FOUND	IC2
GCA_001640075.1_ASM164007v1	2	NOT_FOUND	IC2
GCA_001648035.1_ASM164803v1	1035	NOT_FOUND	NOIC
GCA_001649595.1_ASM164959v1	107	NOT_FOUND	NOIC
GCA_001649615.1_ASM164961v1	317	NOT_FOUND	NOIC
GCA_001649625.1_ASM164962v1	317	NOT_FOUND	NOIC
GCA_001649675.1_ASM164967v1	79	NOT_FOUND	IC5
GCA_001649695.1_ASM164969v1	79	OXA-65	IC5
GCA_001649705.1_ASM164970v1	79	NOT_FOUND	IC5
GCA_001649735.1_ASM164973v1	ND	OXA-65	NOIC
GCA_001649765.1_ASM164976v1	79	NOT_FOUND	IC5
GCA_001649795.1_ASM164979v1	79	NOT_FOUND	IC5
GCA_001649805.1_ASM164980v1	79	NOT_FOUND	IC5
GCA_001649815.1_ASM164981v1	107	NOT_FOUND	NOIC
GCA_001649835.1_ASM164983v1	79	NOT_FOUND	IC5
GCA_001649875.1_ASM164987v1	79	NOT_FOUND	IC5
GCA_001649885.1_ASM164988v1	79	OXA-65	IC5
GCA_001649895.1_ASM164989v1	79	NOT_FOUND	IC5
GCA_001649915.1_ASM164991v1	79	OXA-65	IC5
GCA_001649955.1_ASM164995v1	79	NOT_FOUND	IC5
GCA_001649975.1_ASM164997v1	317	NOT_FOUND	NOIC
GCA_001657725.1_ASM165772v1	1	NOT_FOUND	IC1
GCA_001661665.1_ASM166166v1	2	NOT_FOUND	IC2
GCA_001664565.1_ASM166456v1	2	NOT_FOUND	IC2
GCA_001664575.1_ASM166457v1	2	NOT_FOUND	IC2
GCA_001664585.1_ASM166458v1	2	NOT_FOUND	IC2
GCA_001664595.1_ASM166459v1	2	NOT_FOUND	IC2
GCA_001664645.1_ASM166464v1	2	NOT_FOUND	IC2
GCA_001664655.1_ASM166465v1	2	NOT_FOUND	IC2
GCA_001664665.1_ASM166466v1	2	NOT_FOUND	IC2
GCA_001664685.1_ASM166468v1	1088	NOT_FOUND	NOIC
GCA_001664725.1_ASM166472v1	2	NOT_FOUND	IC2
GCA_001664735.1_ASM166473v1	2	NOT_FOUND	IC2
GCA_001664755.1_ASM166475v1	2	NOT_FOUND	IC2
GCA_001664765.1_ASM166476v1	406	NOT_FOUND	NOIC
GCA_001664805.1_ASM166480v1	2	NOT_FOUND	IC2
GCA_001664815.1_ASM166481v1	250	NOT_FOUND	NOIC
GCA_001664835.1_ASM166483v1	2	NOT_FOUND	IC2
GCA_001664855.1_ASM166485v1	2	NOT_FOUND	IC2
GCA_001664885.1_ASM166488v1	2	NOT_FOUND	IC2
GCA_001664895.1_ASM166489v1	2	NOT_FOUND	IC2
GCA_001664905.1_ASM166490v1	2	NOT_FOUND	IC2
GCA_001664915.1_ASM166491v1	2	NOT_FOUND	IC2
GCA_001664965.1_ASM166496v1	2	NOT_FOUND	IC2
GCA_001664975.1_ASM166497v1	2	NOT_FOUND	IC2
GCA_001664985.1_ASM166498v1	2	NOT_FOUND	IC2
GCA_001665005.1_ASM166500v1	499	NOT_FOUND	NOIC
GCA_001665045.1_ASM166504v1	2	NOT_FOUND	IC2
GCA_001665055.1_ASM166505v1	2	NOT_FOUND	IC2
GCA_001665065.1_ASM166506v1	2	NOT_FOUND	IC2
GCA_001665095.1_ASM166509v1	2	NOT_FOUND	IC2
GCA_001665125.1_ASM166512v1	2	NOT_FOUND	IC2
GCA_001665145.1_ASM166514v1	406	NOT_FOUND	NOIC
GCA_001665155.1_ASM166515v1	632	NOT_FOUND	NOIC
GCA_001665175.1_ASM166517v1	2	NOT_FOUND	IC2
GCA_001665205.1_ASM166520v1	2	NOT_FOUND	IC2
GCA_001665215.1_ASM166521v1	2	NOT_FOUND	IC2
GCA_001665285.1_ASM166528v1	2	NOT_FOUND	IC2
GCA_001665985.1_ASM166598v1	2	NOT_FOUND	IC2
GCA_001666065.1_ASM166606v1	2	NOT_FOUND	IC2
GCA_001666075.1_ASM166607v1	2	NOT_FOUND	IC2
GCA_001666085.1_ASM166608v1	2	NOT_FOUND	IC2
GCA_001666105.1_ASM166610v1	2	NOT_FOUND	IC2
GCA_001666145.1_ASM166614v1	2	NOT_FOUND	IC2
GCA_001666155.1_ASM166615v1	2	NOT_FOUND	IC2
GCA_001666175.1_ASM166617v1	2	NOT_FOUND	IC2
GCA_001666195.1_ASM166619v1	2	NOT_FOUND	IC2
GCA_001666225.1_ASM166622v1	250	NOT_FOUND	NOIC
GCA_001666235.1_ASM166623v1	2	NOT_FOUND	IC2
GCA_001666255.1_ASM166625v1	2	NOT_FOUND	IC2
GCA_001666275.1_ASM166627v1	2	NOT_FOUND	IC2
GCA_001666305.1_ASM166630v1	2	NOT_FOUND	IC2
GCA_001666315.1_ASM166631v1	2	NOT_FOUND	IC2
GCA_001666325.1_ASM166632v1	2	NOT_FOUND	IC2
GCA_001666365.1_ASM166636v1	1088	NOT_FOUND	NOIC
GCA_001666385.1_ASM166638v1	2	NOT_FOUND	IC2
GCA_001666395.1_ASM166639v1	2	NOT_FOUND	IC2
GCA_001666405.1_ASM166640v1	632	NOT_FOUND	NOIC
GCA_001666425.1_ASM166642v1	2	NOT_FOUND	IC2
GCA_001666465.1_ASM166646v1	2	NOT_FOUND	IC2
GCA_001666475.1_ASM166647v1	2	NOT_FOUND	IC2
GCA_001666485.1_ASM166648v1	2	NOT_FOUND	IC2
GCA_001666515.1_ASM166651v1	2	NOT_FOUND	IC2
GCA_001666545.1_ASM166654v1	2	NOT_FOUND	IC2
GCA_001666555.1_ASM166655v1	2	NOT_FOUND	IC2
GCA_001666565.1_ASM166656v1	2	NOT_FOUND	IC2
GCA_001666575.1_ASM166657v1	2	NOT_FOUND	IC2
GCA_001666625.1_ASM166662v1	2	NOT_FOUND	IC2
GCA_001666635.1_ASM166663v1	2	NOT_FOUND	IC2
GCA_001666645.1_ASM166664v1	2	NOT_FOUND	IC2
GCA_001666665.1_ASM166666v1	2	NOT_FOUND	IC2
GCA_001666705.1_ASM166670v1	2	NOT_FOUND	IC2
GCA_001666715.1_ASM166671v1	2	NOT_FOUND	IC2
GCA_001668445.1_ASM166844v1	2	NOT_FOUND	IC2
GCA_001668465.2_ASM166846v2	2	NOT_FOUND	IC2
GCA_001668475.1_ASM166847v1	2	NOT_FOUND	IC2
GCA_001668515.1_ASM166851v1	2	NOT_FOUND	IC2
GCA_001668535.1_ASM166853v1	2	NOT_FOUND	IC2
GCA_001668555.1_ASM166855v1	2	NOT_FOUND	IC2
GCA_001668585.1_ASM166858v1	2	NOT_FOUND	IC2
GCA_001668645.1_ASM166864v1	2	NOT_FOUND	IC2
GCA_001668755.1_ASM166875v1	2	NOT_FOUND	IC2
GCA_001668765.1_ASM166876v1	2	NOT_FOUND	IC2
GCA_001668775.1_ASM166877v1	2	NOT_FOUND	IC2
GCA_001668815.1_ASM166881v1	2	NOT_FOUND	IC2
GCA_001668835.1_ASM166883v1	2	NOT_FOUND	IC2
GCA_001668855.1_ASM166885v1	2	NOT_FOUND	IC2
GCA_001668865.1_ASM166886v1	2	NOT_FOUND	IC2
GCA_001668875.1_ASM166887v1	499	NOT_FOUND	NOIC
GCA_001668915.1_ASM166891v1	2	NOT_FOUND	IC2
GCA_001668935.1_ASM166893v1	2	NOT_FOUND	IC2
GCA_001668945.1_ASM166894v1	2	NOT_FOUND	IC2
GCA_001668955.1_ASM166895v1	2	NOT_FOUND	IC2
GCA_001668995.1_ASM166899v1	2	NOT_FOUND	IC2
GCA_001669005.1_ASM166900v1	2	NOT_FOUND	IC2
GCA_001669025.1_ASM166902v1	2	NOT_FOUND	IC2
GCA_001669035.1_ASM166903v1	2	NOT_FOUND	IC2
GCA_001669075.1_ASM166907v1	2	NOT_FOUND	IC2
GCA_001669095.1_ASM166909v1	2	NOT_FOUND	IC2
GCA_001669105.1_ASM166910v1	2	NOT_FOUND	IC2
GCA_001669115.1_ASM166911v1	2	NOT_FOUND	IC2
GCA_001669145.2_ASM166914v2	2	NOT_FOUND	IC2
GCA_001669175.1_ASM166917v1	2	NOT_FOUND	IC2
GCA_001669185.1_ASM166918v1	2	NOT_FOUND	IC2
GCA_001669195.1_ASM166919v1	2	NOT_FOUND	IC2
GCA_001669225.1_ASM166922v1	2	NOT_FOUND	IC2
GCA_001669255.1_ASM166925v1	2	NOT_FOUND	IC2
GCA_001669265.1_ASM166926v1	2	NOT_FOUND	IC2
GCA_001669295.1_ASM166929v1	2	NOT_FOUND	IC2
GCA_001669305.1_ASM166930v1	2	NOT_FOUND	IC2
GCA_001669355.1_ASM166935v1	2	NOT_FOUND	IC2
GCA_001669365.1_ASM166936v1	2	NOT_FOUND	IC2
GCA_001669415.1_ASM166941v1	2	NOT_FOUND	IC2
GCA_001669425.1_ASM166942v1	2	NOT_FOUND	IC2
GCA_001669435.1_ASM166943v1	2	NOT_FOUND	IC2
GCA_001669455.1_ASM166945v1	2	NOT_FOUND	IC2
GCA_001669495.1_ASM166949v1	2	NOT_FOUND	IC2
GCA_001669505.1_ASM166950v1	2	NOT_FOUND	IC2
GCA_001669525.1_ASM166952v1	2	NOT_FOUND	IC2
GCA_001669535.1_ASM166953v1	2	NOT_FOUND	IC2
GCA_001669575.1_ASM166957v1	2	NOT_FOUND	IC2
GCA_001669595.1_ASM166959v1	2	NOT_FOUND	IC2
GCA_001669605.1_ASM166960v1	2	NOT_FOUND	IC2
GCA_001669635.1_ASM166963v1	2	NOT_FOUND	IC2
GCA_001669645.1_ASM166964v1	2	NOT_FOUND	IC2
GCA_001669675.1_ASM166967v1	2	NOT_FOUND	IC2
GCA_001669695.1_ASM166969v1	2	NOT_FOUND	IC2
GCA_001669705.1_ASM166970v1	2	NOT_FOUND	IC2
GCA_001669735.1_ASM166973v1	2	NOT_FOUND	IC2
GCA_001672535.1_ASM167253v1	2	NOT_FOUND	IC2
GCA_001673795.1_ASM167379v1	2	NOT_FOUND	IC2
GCA_001673805.1_ASM167380v1	2	NOT_FOUND	IC2
GCA_001673815.1_ASM167381v1	2	NOT_FOUND	IC2
GCA_001673825.1_ASM167382v1	2	NOT_FOUND	IC2
GCA_001673875.1_ASM167387v1	2	NOT_FOUND	IC2
GCA_001673895.1_ASM167389v1	2	NOT_FOUND	IC2
GCA_001673905.1_ASM167390v1	2	NOT_FOUND	IC2
GCA_001673915.1_ASM167391v1	2	NOT_FOUND	IC2
GCA_001673955.1_ASM167395v1	2	NOT_FOUND	IC2
GCA_001673975.1_ASM167397v1	2	NOT_FOUND	IC2
GCA_001673985.1_ASM167398v1	2	NOT_FOUND	IC2
GCA_001674015.1_ASM167401v1	2	NOT_FOUND	IC2
GCA_001674035.1_ASM167403v1	ND	NOT_FOUND	NOIC
GCA_001674045.1_ASM167404v1	2	NOT_FOUND	IC2
GCA_001674075.1_ASM167407v1	2	NOT_FOUND	IC2
GCA_001674085.1_ASM167408v1	2	NOT_FOUND	IC2
GCA_001674115.1_ASM167411v1	2	NOT_FOUND	IC2
GCA_001674135.1_ASM167413v1	2	NOT_FOUND	IC2
GCA_001674155.1_ASM167415v1	2	NOT_FOUND	IC2
GCA_001674165.1_ASM167416v1	2	NOT_FOUND	IC2
GCA_001674185.1_ASM167418v1	250	NOT_FOUND	NOIC
GCA_001674215.1_ASM167421v1	2	NOT_FOUND	IC2
GCA_001674235.1_ASM167423v1	2	NOT_FOUND	IC2
GCA_001674245.1_ASM167424v1	2	NOT_FOUND	IC2
GCA_001674255.1_ASM167425v1	2	NOT_FOUND	IC2
GCA_001674295.1_ASM167429v1	2	NOT_FOUND	IC2
GCA_001674315.1_ASM167431v1	2	NOT_FOUND	IC2
GCA_001674325.1_ASM167432v1	2	NOT_FOUND	IC2
GCA_001674345.1_ASM167434v1	2	NOT_FOUND	IC2
GCA_001674365.1_ASM167436v1	2	NOT_FOUND	IC2
GCA_001674395.1_ASM167439v1	2	NOT_FOUND	IC2
GCA_001674415.1_ASM167441v1	2	NOT_FOUND	IC2
GCA_001674425.1_ASM167442v1	2	NOT_FOUND	IC2
GCA_001674435.1_ASM167443v1	2	NOT_FOUND	IC2
GCA_001674475.2_ASM167447v2	2	NOT_FOUND	IC2
GCA_001674485.1_ASM167448v1	632	NOT_FOUND	NOIC
GCA_001674505.2_ASM167450v2	2	NOT_FOUND	IC2
GCA_001674515.1_ASM167451v1	2	NOT_FOUND	IC2
GCA_001674555.1_ASM167455v1	2	NOT_FOUND	IC2
GCA_001674575.1_ASM167457v1	2	NOT_FOUND	IC2
GCA_001674585.1_ASM167458v1	2	NOT_FOUND	IC2
GCA_001674605.1_ASM167460v1	2	NOT_FOUND	IC2
GCA_001674635.1_ASM167463v1	2	NOT_FOUND	IC2
GCA_001674655.1_ASM167465v1	2	NOT_FOUND	IC2
GCA_001674665.1_ASM167466v1	2	NOT_FOUND	IC2
GCA_001674695.1_ASM167469v1	1079	NOT_FOUND	NOIC
GCA_001674705.1_ASM167470v1	2	NOT_FOUND	IC2
GCA_001674735.1_ASM167473v1	2	NOT_FOUND	IC2
GCA_001674755.1_ASM167475v1	2	NOT_FOUND	IC2
GCA_001674765.1_ASM167476v1	2	NOT_FOUND	IC2
GCA_001674785.1_ASM167478v1	2	NOT_FOUND	IC2
GCA_001674805.1_ASM167480v1	2	NOT_FOUND	IC2
GCA_001674835.1_ASM167483v1	2	NOT_FOUND	IC2
GCA_001674845.1_ASM167484v1	2	NOT_FOUND	IC2
GCA_001674865.1_ASM167486v1	2	NOT_FOUND	IC2
GCA_001674885.1_ASM167488v1	2	NOT_FOUND	IC2
GCA_001674915.1_ASM167491v1	2	NOT_FOUND	IC2
GCA_001675265.1_ASM167526v1	111	NOT_FOUND	NOIC
GCA_001680105.1_ASM168010v1	2	NOT_FOUND	IC2
GCA_001680115.1_ASM168011v1	2	NOT_FOUND	IC2
GCA_001680185.1_ASM168018v1	2	NOT_FOUND	IC2
GCA_001680195.1_ASM168019v1	2	NOT_FOUND	IC2
GCA_001680215.1_ASM168021v1	2	NOT_FOUND	IC2
GCA_001680225.1_ASM168022v1	2	NOT_FOUND	IC2
GCA_001680265.1_ASM168026v1	2	NOT_FOUND	IC2
GCA_001680285.1_ASM168028v1	2	NOT_FOUND	IC2
GCA_001680295.1_ASM168029v1	2	NOT_FOUND	IC2
GCA_001680305.1_ASM168030v1	2	NOT_FOUND	IC2
GCA_001680345.1_ASM168034v1	2	NOT_FOUND	IC2
GCA_001680365.1_ASM168036v1	2	NOT_FOUND	IC2
GCA_001680375.1_ASM168037v1	2	NOT_FOUND	IC2
GCA_001680395.1_ASM168039v1	2	NOT_FOUND	IC2
GCA_001680425.1_ASM168042v1	2	NOT_FOUND	IC2
GCA_001680445.1_ASM168044v1	2	NOT_FOUND	IC2
GCA_001680475.1_ASM168047v1	2	NOT_FOUND	IC2
GCA_001693095.1_ASM169309v1	388	NOT_FOUND	NOIC
GCA_001693105.1_ASM169310v1	943	NOT_FOUND	NOIC
GCA_001693115.1_ASM169311v1	23	NOT_FOUND	IC8
GCA_001693125.1_ASM169312v1	821	NOT_FOUND	NOIC
GCA_001693175.1_ASM169317v1	821	NOT_FOUND	NOIC
GCA_001693185.1_ASM169318v1	512	NOT_FOUND	NOIC
GCA_001693195.1_ASM169319v1	309	NOT_FOUND	NOIC
GCA_001693205.1_ASM169320v1	80	NOT_FOUND	NOIC
GCA_001700395.1_ASM170039v1	2	NOT_FOUND	IC2
GCA_001700445.1_ASM170044v1	79	NOT_FOUND	IC5
GCA_001704675.1_ASM170467v1	10	NOT_FOUND	IC8
GCA_001704685.1_ASM170468v1	2	NOT_FOUND	IC2
GCA_001704695.1_ASM170469v1	1	NOT_FOUND	IC1
GCA_001704705.1_ASM170470v1	10	NOT_FOUND	IC8
GCA_001707985.1_ASM170798v1	2	NOT_FOUND	IC2
GCA_001708025.1_ASM170802v1	2	NOT_FOUND	IC2
GCA_001721365.1_ASM172136v1	437	NOT_FOUND	NOIC
GCA_001721375.1_ASM172137v1	437	NOT_FOUND	NOIC
GCA_001721385.1_ASM172138v1	437	NOT_FOUND	NOIC
GCA_001721425.1_ASM172142v1	437	NOT_FOUND	NOIC
GCA_001721445.1_ASM172144v1	437	NOT_FOUND	NOIC
GCA_001721455.1_ASM172145v1	437	NOT_FOUND	NOIC
GCA_001721465.1_ASM172146v1	437	NOT_FOUND	NOIC
GCA_001721475.1_ASM172147v1	437	NOT_FOUND	NOIC
GCA_001721705.1_ASM172170v1	1546	NOT_FOUND	NOIC
GCA_001756815.1_ASM175681v1	107	NOT_FOUND	NOIC
GCA_001758065.1_ASM175806v1	32	NOT_FOUND	NOIC
GCA_001758085.1_ASM175808v1	15	NOT_FOUND	IC4
GCA_001758125.1_ASM175812v1	107	NOT_FOUND	NOIC
GCA_001758135.1_ASM175813v1	79	NOT_FOUND	IC5
GCA_001758155.1_ASM175815v1	317	NOT_FOUND	NOIC
GCA_001758165.1_ASM175816v1	107	NOT_FOUND	NOIC
GCA_001806345.1_ASM180634v1	2	NOT_FOUND	IC2
GCA_001806365.1_ASM180636v1	2	NOT_FOUND	IC2
GCA_001806385.1_ASM180638v1	2	NOT_FOUND	IC2
GCA_001806405.1_ASM180640v1	2	NOT_FOUND	IC2
GCA_001806425.1_ASM180642v1	2	NOT_FOUND	IC2
GCA_001806445.1_ASM180644v1	2	NOT_FOUND	IC2
GCA_001806465.1_ASM180646v1	2	NOT_FOUND	IC2
GCA_001806485.1_ASM180648v1	2	NOT_FOUND	IC2
GCA_001855175.1_ASM185517v1	2	NOT_FOUND	IC2
GCA_001861375.1_ASM186137v1	ND	NOT_FOUND	NOIC
GCA_001861385.2_ASM186138v2	2	NOT_FOUND	IC2
GCA_001861395.1_ASM186139v1	ND	NOT_FOUND	NOIC
GCA_001861435.1_ASM186143v1	2	NOT_FOUND	IC2
GCA_001861455.1_ASM186145v1	2	OXA-66	IC2
GCA_001861465.1_ASM186146v1	2	NOT_FOUND	IC2
GCA_001861475.2_ASM186147v2	2	NOT_FOUND	IC2
GCA_001861515.1_ASM186151v1	2	NOT_FOUND	IC2
GCA_001861535.1_ASM186153v1	2	NOT_FOUND	IC2
GCA_001861545.1_ASM186154v1	2	NOT_FOUND	IC2
GCA_001861565.1_ASM186156v1	2	OXA-66	IC2
GCA_001861585.1_ASM186158v1	2	NOT_FOUND	IC2
GCA_001861615.1_ASM186161v1	2	NOT_FOUND	IC2
GCA_001861655.1_ASM186165v1	2	NOT_FOUND	IC2
GCA_001861665.1_ASM186166v1	2	NOT_FOUND	IC2
GCA_001861695.1_ASM186169v1	2	NOT_FOUND	IC2
GCA_001861735.1_ASM186173v1	2	NOT_FOUND	IC2
GCA_001861745.1_ASM186174v1	2	NOT_FOUND	IC2
GCA_001861775.1_ASM186177v1	2	NOT_FOUND	IC2
GCA_001861785.1_ASM186178v1	2	NOT_FOUND	IC2
GCA_001861795.1_ASM186179v1	2	OXA-66	IC2
GCA_001861835.2_ASM186183v2	2	NOT_FOUND	IC2
GCA_001861855.1_ASM186185v1	2	NOT_FOUND	IC2
GCA_001861865.1_ASM186186v1	2	NOT_FOUND	IC2
GCA_001861895.1_ASM186189v1	2	NOT_FOUND	IC2
GCA_001861905.1_ASM186190v1	2	NOT_FOUND	IC2
GCA_001861935.1_ASM186193v1	10	NOT_FOUND	IC8
GCA_001861955.1_ASM186195v1	10	NOT_FOUND	IC8
GCA_001861975.1_ASM186197v1	2	NOT_FOUND	IC2
GCA_001861995.1_ASM186199v1	2	NOT_FOUND	IC2
GCA_001862005.1_ASM186200v1	ND	NOT_FOUND	NOIC
GCA_001862035.1_ASM186203v1	2	NOT_FOUND	IC2
GCA_001862055.1_ASM186205v1	2	NOT_FOUND	IC2
GCA_001862065.1_ASM186206v1	2	NOT_FOUND	IC2
GCA_001862075.1_ASM186207v1	2	NOT_FOUND	IC2
GCA_001862105.1_ASM186210v1	2	NOT_FOUND	IC2
GCA_001862135.1_ASM186213v1	ND	NOT_FOUND	NOIC
GCA_001862145.1_ASM186214v1	2	OXA-66	IC2
GCA_001862175.1_ASM186217v1	2	NOT_FOUND	IC2
GCA_001862185.1_ASM186218v1	2	OXA-66	IC2
GCA_001862215.1_ASM186221v1	2	NOT_FOUND	IC2
GCA_001862225.1_ASM186222v1	2	NOT_FOUND	IC2
GCA_001862235.1_ASM186223v1	2	NOT_FOUND	IC2
GCA_001862265.1_ASM186226v1	2	NOT_FOUND	IC2
GCA_001862295.1_ASM186229v1	2	NOT_FOUND	IC2
GCA_001862305.1_ASM186230v1	2	NOT_FOUND	IC2
GCA_001862335.1_ASM186233v1	46	NOT_FOUND	NOIC
GCA_001862345.1_ASM186234v1	2	NOT_FOUND	IC2
GCA_001862375.1_ASM186237v1	2	NOT_FOUND	IC2
GCA_001862385.1_ASM186238v1	880	NOT_FOUND	NOIC
GCA_001862395.1_ASM186239v1	2	NOT_FOUND	IC2
GCA_001862425.1_ASM186242v1	2	NOT_FOUND	IC2
GCA_001862455.1_ASM186245v1	2	NOT_FOUND	IC2
GCA_001862475.2_ASM186247v2	2	NOT_FOUND	IC2
GCA_001862485.1_ASM186248v1	2	NOT_FOUND	IC2
GCA_001862505.1_ASM186250v1	2	NOT_FOUND	IC2
GCA_001862535.1_ASM186253v1	2	NOT_FOUND	IC2
GCA_001862555.1_ASM186255v1	2	NOT_FOUND	IC2
GCA_001862565.1_ASM186256v1	2	NOT_FOUND	IC2
GCA_001862585.2_ASM186258v2	ND	NOT_FOUND	NOIC
GCA_001862615.1_ASM186261v1	2	NOT_FOUND	IC2
GCA_001862635.1_ASM186263v1	2	OXA-66	IC2
GCA_001862645.1_ASM186264v1	2	NOT_FOUND	IC2
GCA_001862665.1_ASM186266v1	2	NOT_FOUND	IC2
GCA_001862715.1_ASM186271v1	2	NOT_FOUND	IC2
GCA_001862725.1_ASM186272v1	338	NOT_FOUND	NOIC
GCA_001862735.1_ASM186273v1	2	NOT_FOUND	IC2
GCA_001862775.1_ASM186277v1	2	NOT_FOUND	IC2
GCA_001862795.1_ASM186279v1	23	NOT_FOUND	IC8
GCA_001862805.1_ASM186280v1	ND	NOT_FOUND	NOIC
GCA_001862825.1_ASM186282v1	2	NOT_FOUND	IC2
GCA_001862855.1_ASM186285v1	2	NOT_FOUND	IC2
GCA_001862875.1_ASM186287v1	2	NOT_FOUND	IC2
GCA_001862885.1_ASM186288v1	2	NOT_FOUND	IC2
GCA_001862895.1_ASM186289v1	2	NOT_FOUND	IC2
GCA_001862925.1_ASM186292v1	ND	OXA-66	NOIC
GCA_001862955.1_ASM186295v1	2	NOT_FOUND	IC2
GCA_001862975.1_ASM186297v1	2	NOT_FOUND	IC2
GCA_001862985.1_ASM186298v1	2	NOT_FOUND	IC2
GCA_001863015.1_ASM186301v1	2	NOT_FOUND	IC2
GCA_001863035.1_ASM186303v1	2	NOT_FOUND	IC2
GCA_001863055.1_ASM186305v1	2	NOT_FOUND	IC2
GCA_001863065.1_ASM186306v1	2	NOT_FOUND	IC2
GCA_001863085.1_ASM186308v1	2	NOT_FOUND	IC2
GCA_001863115.1_ASM186311v1	2	NOT_FOUND	IC2
GCA_001863135.1_ASM186313v1	2	NOT_FOUND	IC2
GCA_001863145.1_ASM186314v1	2	NOT_FOUND	IC2
GCA_001863165.1_ASM186316v1	2	NOT_FOUND	IC2
GCA_001863195.1_ASM186319v1	2	OXA-66	IC2
GCA_001863205.1_ASM186320v1	2	NOT_FOUND	IC2
GCA_001863225.1_ASM186322v1	2	NOT_FOUND	IC2
GCA_001863235.1_ASM186323v1	2	OXA-66	IC2
GCA_001863275.1_ASM186327v1	ND	NOT_FOUND	NOIC
GCA_001863295.1_ASM186329v1	2	NOT_FOUND	IC2
GCA_001863315.1_ASM186331v1	2	NOT_FOUND	IC2
GCA_001863335.1_ASM186333v1	2	NOT_FOUND	IC2
GCA_001863345.1_ASM186334v1	2	NOT_FOUND	IC2
GCA_001863395.1_ASM186339v1	2	NOT_FOUND	IC2
GCA_001863405.1_ASM186340v1	2	NOT_FOUND	IC2
GCA_001863415.1_ASM186341v1	46	NOT_FOUND	NOIC
GCA_001863455.1_ASM186345v1	2	NOT_FOUND	IC2
GCA_001863465.1_ASM186346v1	2	NOT_FOUND	IC2
GCA_001863475.1_ASM186347v1	2	NOT_FOUND	IC2
GCA_001863485.1_ASM186348v1	46	NOT_FOUND	NOIC
GCA_001863535.1_ASM186353v1	2	NOT_FOUND	IC2
GCA_001863545.1_ASM186354v1	2	NOT_FOUND	IC2
GCA_001863555.1_ASM186355v1	2	NOT_FOUND	IC2
GCA_001863575.1_ASM186357v1	2	NOT_FOUND	IC2
GCA_001863615.1_ASM186361v1	2	NOT_FOUND	IC2
GCA_001863625.1_ASM186362v1	2	NOT_FOUND	IC2
GCA_001863665.1_ASM186366v1	2	NOT_FOUND	IC2
GCA_001863695.1_ASM186369v1	2	NOT_FOUND	IC2
GCA_001863705.1_ASM186370v1	875	NOT_FOUND	NOIC
GCA_001863725.1_ASM186372v1	46	NOT_FOUND	NOIC
GCA_001863745.1_ASM186374v1	46	NOT_FOUND	NOIC
GCA_001863775.1_ASM186377v1	2	NOT_FOUND	IC2
GCA_001863785.1_ASM186378v1	878	NOT_FOUND	NOIC
GCA_001863815.1_ASM186381v1	2	NOT_FOUND	IC2
GCA_001863835.1_ASM186383v1	46	NOT_FOUND	NOIC
GCA_001863855.1_ASM186385v1	2	NOT_FOUND	IC2
GCA_001863865.1_ASM186386v1	2	NOT_FOUND	IC2
GCA_001863875.1_ASM186387v1	2	NOT_FOUND	IC2
GCA_001863905.1_ASM186390v1	2	NOT_FOUND	IC2
GCA_001863935.1_ASM186393v1	2	NOT_FOUND	IC2
GCA_001863955.1_ASM186395v1	2	NOT_FOUND	IC2
GCA_001863965.1_ASM186396v1	2	NOT_FOUND	IC2
GCA_001863975.1_ASM186397v1	ND	NOT_FOUND	NOIC
GCA_001864015.1_ASM186401v1	2	NOT_FOUND	IC2
GCA_001864035.1_ASM186403v1	2	NOT_FOUND	IC2
GCA_001864045.1_ASM186404v1	2	NOT_FOUND	IC2
GCA_001864065.1_ASM186406v1	2	NOT_FOUND	IC2
GCA_001864095.1_ASM186409v1	46	NOT_FOUND	NOIC
GCA_001864115.1_ASM186411v1	2	NOT_FOUND	IC2
GCA_001864125.1_ASM186412v1	2	NOT_FOUND	IC2
GCA_001864155.1_ASM186415v1	46	NOT_FOUND	NOIC
GCA_001864165.1_ASM186416v1	46	NOT_FOUND	NOIC
GCA_001864195.1_ASM186419v1	2	NOT_FOUND	IC2
GCA_001864235.1_ASM186423v1	46	NOT_FOUND	NOIC
GCA_001864275.1_ASM186427v1	46	OXA-531	NOIC
GCA_001864285.1_ASM186428v1	2	NOT_FOUND	IC2
GCA_001864305.1_ASM186430v1	2	NOT_FOUND	IC2
GCA_001864315.1_ASM186431v1	2	NOT_FOUND	IC2
GCA_001864355.1_ASM186435v1	46	NOT_FOUND	NOIC
GCA_001864375.1_ASM186437v1	2	NOT_FOUND	IC2
GCA_001864385.1_ASM186438v1	2	NOT_FOUND	IC2
GCA_001864395.1_ASM186439v1	2	NOT_FOUND	IC2
GCA_001864435.1_ASM186443v1	46	NOT_FOUND	NOIC
GCA_001864455.1_ASM186445v1	2	NOT_FOUND	IC2
GCA_001864465.1_ASM186446v1	46	NOT_FOUND	NOIC
GCA_001864475.1_ASM186447v1	2	NOT_FOUND	IC2
GCA_001864505.1_ASM186450v1	2	OXA-66	IC2
GCA_001864535.1_ASM186453v1	ND	NOT_FOUND	NOIC
GCA_001864555.1_ASM186455v1	23	NOT_FOUND	IC8
GCA_001864565.1_ASM186456v1	2	NOT_FOUND	IC2
GCA_001864575.1_ASM186457v1	879	NOT_FOUND	NOIC
GCA_001864615.1_ASM186461v1	2	NOT_FOUND	IC2
GCA_001864635.1_ASM186463v1	2	NOT_FOUND	IC2
GCA_001864655.1_ASM186465v1	2	NOT_FOUND	IC2
GCA_001864665.1_ASM186466v1	ND	NOT_FOUND	NOIC
GCA_001864675.1_ASM186467v1	2	NOT_FOUND	IC2
GCA_001864715.1_ASM186471v1	10	NOT_FOUND	IC8
GCA_001864735.1_ASM186473v1	ND	OXA-500	NOIC
GCA_001864745.1_ASM186474v1	ND	NOT_FOUND	NOIC
GCA_001864755.1_ASM186475v1	2	NOT_FOUND	IC2
GCA_001864795.1_ASM186479v1	2	NOT_FOUND	IC2
GCA_001864815.1_ASM186481v1	2	NOT_FOUND	IC2
GCA_001874685.1_ASM187468v1	79	NOT_FOUND	IC5
GCA_001874765.1_ASM187476v1	85	NOT_FOUND	IC9
GCA_001874885.1_ASM187488v1	85	NOT_FOUND	IC9
GCA_001874915.1_ASM187491v1	2	NOT_FOUND	IC2
GCA_001874945.1_ASM187494v1	1	NOT_FOUND	IC1
GCA_001887305.1_ASM188730v1	2	NOT_FOUND	IC2
GCA_001891205.1_ASM189120v1	920	NOT_FOUND	NOIC
GCA_001895125.2_ASM189512v2	412	NOT_FOUND	NOIC
GCA_001895985.1_ASM189598v1	2	NOT_FOUND	IC2
GCA_001896005.1_ASM189600v1	79	NOT_FOUND	IC5
GCA_001902375.1_ASM190237v1	2	NOT_FOUND	IC2
GCA_001907125.1_ASM190712v1	2	NOT_FOUND	IC2
GCA_001907145.1_ASM190714v1	1	NOT_FOUND	IC1
GCA_001907155.1_ASM190715v1	1	NOT_FOUND	IC1
GCA_001908295.1_ASM190829v1	10	NOT_FOUND	IC8
GCA_001909135.1_ASM190913v1	2	NOT_FOUND	IC2
GCA_001910585.1_ASM191058v1	1580	NOT_FOUND	NOIC
GCA_001910595.1_ASM191059v1	2	NOT_FOUND	IC2
GCA_001910605.1_ASM191060v1	1580	NOT_FOUND	NOIC
GCA_001910615.1_ASM191061v1	1580	NOT_FOUND	NOIC
GCA_001910665.1_ASM191066v1	1580	NOT_FOUND	NOIC
GCA_001910675.1_ASM191067v1	2	NOT_FOUND	IC2
GCA_001910685.1_ASM191068v1	1580	NOT_FOUND	NOIC
GCA_001922205.1_ASM192220v1	2	NOT_FOUND	IC2
GCA_001922225.1_ASM192222v1	2	NOT_FOUND	IC2
GCA_001922245.1_ASM192224v1	2	NOT_FOUND	IC2
GCA_001922425.2_ASM192242v2	156	NOT_FOUND	IC5
GCA_001922635.1_ASM192263v1	156	NOT_FOUND	IC5
GCA_001922685.1_ASM192268v1	156	NOT_FOUND	IC5
GCA_001922695.1_ASM192269v1	156	NOT_FOUND	IC5
GCA_001922705.1_ASM192270v1	156	NOT_FOUND	IC5
GCA_001922745.1_ASM192274v1	156	NOT_FOUND	IC5
GCA_001922755.1_ASM192275v1	156	NOT_FOUND	IC5
GCA_001923005.1_ASM192300v1	156	NOT_FOUND	IC5
GCA_001936675.2_ASM193667v2	738	NOT_FOUND	NOIC
GCA_001939595.1_ASM193959v1	ND	NOT_FOUND	NOIC
GCA_001939605.1_ASM193960v1	2	NOT_FOUND	IC2
GCA_001939665.1_ASM193966v1	2	NOT_FOUND	IC2
GCA_001941765.1_ASM194176v1	437	NOT_FOUND	NOIC
GCA_001949935.1_ASM194993v1	2	NOT_FOUND	IC2
GCA_001949945.1_ASM194994v1	2	NOT_FOUND	IC2
GCA_001949955.1_ASM194995v1	2	NOT_FOUND	IC2
GCA_001949965.1_ASM194996v1	2	NOT_FOUND	IC2
GCA_001950035.1_ASM195003v1	2	NOT_FOUND	IC2
GCA_001950065.1_ASM195006v1	2	NOT_FOUND	IC2
GCA_001950085.1_ASM195008v1	2	NOT_FOUND	IC2
GCA_001950095.1_ASM195009v1	3	NOT_FOUND	IC3
GCA_001950155.1_ASM195015v1	2	NOT_FOUND	IC2
GCA_001950165.1_ASM195016v1	2	NOT_FOUND	IC2
GCA_001950195.1_ASM195019v1	2	NOT_FOUND	IC2
GCA_001950215.1_ASM195021v1	2	NOT_FOUND	IC2
GCA_001950265.1_ASM195026v1	2	NOT_FOUND	IC2
GCA_001950285.1_ASM195028v1	2	NOT_FOUND	IC2
GCA_001950295.1_ASM195029v1	2	NOT_FOUND	IC2
GCA_001950315.1_ASM195031v1	3	NOT_FOUND	IC3
GCA_001951035.1_A13v1	2	NOT_FOUND	IC2
GCA_001997285.1_ASM199728v1	1168	NOT_FOUND	NOIC
GCA_002006635.1_ASM200663v1	85	NOT_FOUND	IC9
GCA_002006655.1_ASM200665v1	85	NOT_FOUND	IC9
GCA_002006665.1_ASM200666v1	85	NOT_FOUND	IC9
GCA_002009115.1_ASM200911v1	2	OXA-66	IC2
GCA_002014105.1_ASM201410v1	78	NOT_FOUND	IC6
GCA_002014155.1_ASM201415v1	ND	NOT_FOUND	NOIC
GCA_002014175.1_ASM201417v1	2	NOT_FOUND	IC2
GCA_002014195.1_ASM201419v1	2	NOT_FOUND	IC2
GCA_002014235.1_ASM201423v1	2	NOT_FOUND	IC2
GCA_002014245.1_ASM201424v1	2	NOT_FOUND	IC2
GCA_002014265.1_ASM201426v1	2	NOT_FOUND	IC2
GCA_002014275.1_ASM201427v1	1088	NOT_FOUND	NOIC
GCA_002014315.1_ASM201431v1	1195	NOT_FOUND	NOIC
GCA_002014325.1_ASM201432v1	250	NOT_FOUND	NOIC
GCA_002014345.1_ASM201434v1	406	NOT_FOUND	NOIC
GCA_002014355.1_ASM201435v1	2	NOT_FOUND	IC2
GCA_002014395.1_ASM201439v1	2	NOT_FOUND	IC2
GCA_002014405.1_ASM201440v1	2	NOT_FOUND	IC2
GCA_002014435.1_ASM201443v1	2	NOT_FOUND	IC2
GCA_002014445.1_ASM201444v1	2	NOT_FOUND	IC2
GCA_002014475.1_ASM201447v1	2	NOT_FOUND	IC2
GCA_002016655.1_ASM201665v1	1088	NOT_FOUND	NOIC
GCA_002016735.1_ASM201673v1	2	NOT_FOUND	IC2
GCA_002016745.1_ASM201674v1	2	NOT_FOUND	IC2
GCA_002016775.1_ASM201677v1	2	NOT_FOUND	IC2
GCA_002016785.1_ASM201678v1	79	NOT_FOUND	IC5
GCA_002016815.1_ASM201681v1	2	NOT_FOUND	IC2
GCA_002016825.1_ASM201682v1	250	NOT_FOUND	NOIC
GCA_002016855.1_ASM201685v1	406	NOT_FOUND	NOIC
GCA_002016865.1_ASM201686v1	2	NOT_FOUND	IC2
GCA_002016915.1_ASM201691v1	2	NOT_FOUND	IC2
GCA_002016935.1_ASM201693v1	2	NOT_FOUND	IC2
GCA_002016955.1_ASM201695v1	2	NOT_FOUND	IC2
GCA_002016975.1_ASM201697v1	1088	NOT_FOUND	NOIC
GCA_002016985.1_ASM201698v1	79	NOT_FOUND	IC5
GCA_002016995.1_ASM201699v1	1088	NOT_FOUND	NOIC
GCA_002017035.1_ASM201703v1	2	NOT_FOUND	IC2
GCA_002017055.1_ASM201705v1	2	NOT_FOUND	IC2
GCA_002017065.1_ASM201706v1	2	NOT_FOUND	IC2
GCA_002017095.1_ASM201709v1	2	NOT_FOUND	IC2
GCA_002017105.1_ASM201710v1	2	NOT_FOUND	IC2
GCA_002017115.1_ASM201711v1	2	NOT_FOUND	IC2
GCA_002017125.1_ASM201712v1	2	NOT_FOUND	IC2
GCA_002017175.1_ASM201717v1	1088	NOT_FOUND	NOIC
GCA_002017185.1_ASM201718v1	2	NOT_FOUND	IC2
GCA_002017195.1_ASM201719v1	2	NOT_FOUND	IC2
GCA_002017205.1_ASM201720v1	2	NOT_FOUND	IC2
GCA_002017255.1_ASM201725v1	2	NOT_FOUND	IC2
GCA_002017265.1_ASM201726v1	2	NOT_FOUND	IC2
GCA_002017285.1_ASM201728v1	2	NOT_FOUND	IC2
GCA_002017315.1_ASM201731v1	79	NOT_FOUND	IC5
GCA_002017335.1_ASM201733v1	2	NOT_FOUND	IC2
GCA_002017345.1_ASM201734v1	2	NOT_FOUND	IC2
GCA_002017355.1_ASM201735v1	2	NOT_FOUND	IC2
GCA_002017395.1_ASM201739v1	2	NOT_FOUND	IC2
GCA_002017405.1_ASM201740v1	2	NOT_FOUND	IC2
GCA_002017415.1_ASM201741v1	2	NOT_FOUND	IC2
GCA_002017425.1_ASM201742v1	2	NOT_FOUND	IC2
GCA_002017475.1_ASM201747v1	2	NOT_FOUND	IC2
GCA_002017485.1_ASM201748v1	10	NOT_FOUND	IC8
GCA_002017515.1_ASM201751v1	2	NOT_FOUND	IC2
GCA_002017525.1_ASM201752v1	2	NOT_FOUND	IC2
GCA_002017555.1_ASM201755v1	2	NOT_FOUND	IC2
GCA_002017565.1_ASM201756v1	1088	NOT_FOUND	NOIC
GCA_002017595.1_ASM201759v1	1088	NOT_FOUND	NOIC
GCA_002017605.1_ASM201760v1	2	NOT_FOUND	IC2
GCA_002017615.1_ASM201761v1	2	NOT_FOUND	IC2
GCA_002017625.1_ASM201762v1	2	NOT_FOUND	IC2
GCA_002017675.1_ASM201767v1	2	NOT_FOUND	IC2
GCA_002017685.1_ASM201768v1	2	NOT_FOUND	IC2
GCA_002017705.1_ASM201770v1	2	NOT_FOUND	IC2
GCA_002017735.1_ASM201773v1	2	NOT_FOUND	IC2
GCA_002017745.1_ASM201774v1	2	NOT_FOUND	IC2
GCA_002017765.1_ASM201776v1	2	NOT_FOUND	IC2
GCA_002017795.1_ASM201779v1	2	NOT_FOUND	IC2
GCA_002017805.1_ASM201780v1	941	NOT_FOUND	NOIC
GCA_002018935.1_ASM201893v1	79	NOT_FOUND	IC5
GCA_002018965.1_ASM201896v1	79	NOT_FOUND	IC5
GCA_002018995.1_ASM201899v1	79	NOT_FOUND	IC5
GCA_002019005.1_ASM201900v1	79	NOT_FOUND	IC5
GCA_002019025.1_ASM201902v1	79	NOT_FOUND	IC5
GCA_002019035.1_ASM201903v1	79	NOT_FOUND	IC5
GCA_002028445.1_ASM202844v1	2	NOT_FOUND	IC2
GCA_002028475.1_ASM202847v1	2	NOT_FOUND	IC2
GCA_002028485.1_ASM202848v1	2	NOT_FOUND	IC2
GCA_002028535.1_ASM202853v1	2	NOT_FOUND	IC2
GCA_002072795.1_ASM207279v1	2	NOT_FOUND	IC2
GCA_002082625.2_ASM208262v2	2	NOT_FOUND	IC2
GCA_002082645.1_ASM208264v1	2	NOT_FOUND	IC2
GCA_002082685.1_ASM208268v1	2	NOT_FOUND	IC2
GCA_002082705.1_ASM208270v1	2	NOT_FOUND	IC2
GCA_002082725.1_ASM208272v1	2	NOT_FOUND	IC2
GCA_002082745.1_ASM208274v1	2	NOT_FOUND	IC2
GCA_002082785.1_ASM208278v1	25	NOT_FOUND	IC7
GCA_002082805.1_ASM208280v1	10	NOT_FOUND	IC8
GCA_002082825.1_ASM208282v1	1	NOT_FOUND	IC1
GCA_002082845.1_ASM208284v1	187	NOT_FOUND	IC2
GCA_002082865.1_ASM208286v1	2	NOT_FOUND	IC2
GCA_002082885.1_ASM208288v1	2	NOT_FOUND	IC2
GCA_002085505.1_ASM208550v1	2	NOT_FOUND	IC2
GCA_002093815.1_ASM209381v1	2	NOT_FOUND	IC2
GCA_002116575.1_ASM211657v1	2	NOT_FOUND	IC2
GCA_002116925.1_ASM211692v1	52	NOT_FOUND	NOIC
GCA_002119265.1_ASM211926v1	81	NOT_FOUND	IC1
GCA_002119275.1_ASM211927v1	2	NOT_FOUND	IC2
GCA_002119285.1_ASM211928v1	2	NOT_FOUND	IC2
GCA_002119295.1_ASM211929v1	2	NOT_FOUND	IC2
GCA_002119355.1_ASM211935v1	81	NOT_FOUND	IC1
GCA_002136595.1_ASM213659v1	32	NOT_FOUND	NOIC
GCA_002136605.1_ASM213660v1	406	NOT_FOUND	NOIC
GCA_002136615.1_ASM213661v1	2	NOT_FOUND	IC2
GCA_002136655.1_ASM213665v1	150	NOT_FOUND	NOIC
GCA_002136675.1_ASM213667v1	78	NOT_FOUND	IC6
GCA_002136685.1_ASM213668v1	810	NOT_FOUND	NOIC
GCA_002136705.1_ASM213670v1	2	NOT_FOUND	IC2
GCA_002136735.1_ASM213673v1	1048	NOT_FOUND	NOIC
GCA_002136745.1_ASM213674v1	2	NOT_FOUND	IC2
GCA_002136775.1_ASM213677v1	2	NOT_FOUND	IC2
GCA_002136815.1_ASM213681v1	142	NOT_FOUND	NOIC
GCA_002136825.1_ASM213682v1	2	NOT_FOUND	IC2
GCA_002136855.1_ASM213685v1	78	NOT_FOUND	IC6
GCA_002136865.1_ASM213686v1	2	OXA-66	IC2
GCA_002136885.1_ASM213688v1	2	NOT_FOUND	IC2
GCA_002136895.1_ASM213689v1	48	NOT_FOUND	NOIC
GCA_002136935.1_ASM213693v1	2	NOT_FOUND	IC2
GCA_002136955.1_ASM213695v1	494	NOT_FOUND	NOIC
GCA_002136965.1_ASM213696v1	2	NOT_FOUND	IC2
GCA_002136995.1_ASM213699v1	464	NOT_FOUND	IC9
GCA_002137035.1_ASM213703v1	2	NOT_FOUND	IC2
GCA_002137045.1_ASM213704v1	2	NOT_FOUND	IC2
GCA_002137185.1_ASM213718v1	78	NOT_FOUND	IC6
GCA_002137215.1_ASM213721v1	49	NOT_FOUND	NOIC
GCA_002137225.1_ASM213722v1	2	NOT_FOUND	IC2
GCA_002137255.1_ASM213725v1	848	NOT_FOUND	NOIC
GCA_002137265.1_ASM213726v1	498	NOT_FOUND	NOIC
GCA_002137285.1_ASM213728v1	2	NOT_FOUND	IC2
GCA_002137295.1_ASM213729v1	2	NOT_FOUND	IC2
GCA_002137335.1_ASM213733v1	406	NOT_FOUND	NOIC
GCA_002137345.1_ASM213734v1	2	NOT_FOUND	IC2
GCA_002137395.1_ASM213739v1	2	NOT_FOUND	IC2
GCA_002137425.1_ASM213742v1	2	NOT_FOUND	IC2
GCA_002137445.1_ASM213744v1	2	NOT_FOUND	IC2
GCA_002137475.1_ASM213747v1	2	NOT_FOUND	IC2
GCA_002137495.1_ASM213749v1	79	NOT_FOUND	IC5
GCA_002137525.1_ASM213752v1	2	NOT_FOUND	IC2
GCA_002137555.1_ASM213755v1	2	NOT_FOUND	IC2
GCA_002137565.1_ASM213756v1	2	NOT_FOUND	IC2
GCA_002137575.1_ASM213757v1	203	NOT_FOUND	NOIC
GCA_002137645.1_ASM213764v1	49	NOT_FOUND	NOIC
GCA_002137655.1_ASM213765v1	81	NOT_FOUND	IC1
GCA_002137695.1_ASM213769v1	2	NOT_FOUND	IC2
GCA_002137715.1_ASM213771v1	2	NOT_FOUND	IC2
GCA_002137725.1_ASM213772v1	126	NOT_FOUND	NOIC
GCA_002137755.1_ASM213775v1	10	NOT_FOUND	IC8
GCA_002137775.1_ASM213777v1	48	NOT_FOUND	NOIC
GCA_002137795.1_ASM213779v1	2	NOT_FOUND	IC2
GCA_002137815.1_ASM213781v1	2	NOT_FOUND	IC2
GCA_002137875.1_ASM213787v1	2	NOT_FOUND	IC2
GCA_002137895.1_ASM213789v1	2	NOT_FOUND	IC2
GCA_002137945.1_ASM213794v1	203	NOT_FOUND	NOIC
GCA_002137955.1_ASM213795v1	150	NOT_FOUND	NOIC
GCA_002137995.1_ASM213799v1	2	NOT_FOUND	IC2
GCA_002138005.1_ASM213800v1	2	NOT_FOUND	IC2
GCA_002138035.1_ASM213803v1	2	NOT_FOUND	IC2
GCA_002138055.1_ASM213805v1	32	NOT_FOUND	NOIC
GCA_002138065.1_ASM213806v1	78	NOT_FOUND	IC6
GCA_002138105.1_ASM213810v1	25	NOT_FOUND	IC7
GCA_002138115.1_ASM213811v1	2	NOT_FOUND	IC2
GCA_002138155.1_ASM213815v1	49	NOT_FOUND	NOIC
GCA_002138165.1_ASM213816v1	2	NOT_FOUND	IC2
GCA_002138175.1_ASM213817v1	669	NOT_FOUND	NOIC
GCA_002138215.1_ASM213821v1	2	NOT_FOUND	IC2
GCA_002138245.1_ASM213824v1	2	NOT_FOUND	IC2
GCA_002138295.1_ASM213829v1	2	NOT_FOUND	IC2
GCA_002138305.1_ASM213830v1	2	NOT_FOUND	IC2
GCA_002138315.1_ASM213831v1	2	NOT_FOUND	IC2
GCA_002138345.1_ASM213834v1	2	NOT_FOUND	IC2
GCA_002138375.1_ASM213837v1	2	NOT_FOUND	IC2
GCA_002142735.1_ASM214273v1	1048	NOT_FOUND	NOIC
GCA_002142935.1_ASM214293v1	2	NOT_FOUND	IC2
GCA_002142945.1_ASM214294v1	509	NOT_FOUND	NOIC
GCA_002142955.1_ASM214295v1	2	NOT_FOUND	IC2
GCA_002142995.1_ASM214299v1	2	NOT_FOUND	IC2
[truncated: 15,548 more rows]
