# Supplementary material for: International Clones of High Risk of Acinetobacter Baumannii—Definitions, History, Properties and Perspectives
Source: Microorganisms. 2023 Aug 19;11(8):2115. doi: 10.3390/microorganisms11082115 (PMC10459012; doi:10.3390/microorganisms11082115)
Supplement: Supplementary file 1 [file microorganisms-11-02115-s001.zip › tableS2.txt]

Table S2: cgMLST profiles for Genbank A. baumannii isolates		
cgMLST profiles were obtained using MentaLiST v. 0.2.4		
https://github.com/WGS-TB/MentaLiST		
Database: www.cgmlst.org, retrieved February 20, 2023		
https://www.cgmlst.org/ncs/schema/schema/3956907/		
	
	N - indicates novel allele variant not present in the database; 0? - locus is missing; "-" - allele is partially covered		

Sample	ACICU_RS00005	ACICU_RS00010	ACICU_RS00015	ACICU_RS00020	ACICU_RS00025	ACICU_RS00030	ACICU_RS00035	ACICU_RS00040	ACICU_RS00045	ACICU_RS00050	ACICU_RS00055	ACICU_RS00065	ACICU_RS00070	ACICU_RS00075	ACICU_RS00085	ACICU_RS00090	ACICU_RS00095	ACICU_RS00100	ACICU_RS00115	ACICU_RS00125	ACICU_RS00130	ACICU_RS00135	ACICU_RS00140	ACICU_RS00145	ACICU_RS00150	ACICU_RS00155	ACICU_RS00165	ACICU_RS00170	ACICU_RS00175	ACICU_RS00180	ACICU_RS00185	ACICU_RS00190	ACICU_RS00195	ACICU_RS00200	ACICU_RS00235	ACICU_RS00240	ACICU_RS00250	ACICU_RS00255	ACICU_RS00260	ACICU_RS00265	ACICU_RS00270	ACICU_RS00275	ACICU_RS00280	ACICU_RS00285	ACICU_RS00290	ACICU_RS00295	ACICU_RS00300	ACICU_RS00305	ACICU_RS00310	ACICU_RS00315	ACICU_RS00320	ACICU_RS00325	ACICU_RS00330	ACICU_RS00335	ACICU_RS00340	ACICU_RS00345	ACICU_RS00350	ACICU_RS00355	ACICU_RS00365	ACICU_RS00370	ACICU_RS00375	ACICU_RS00380	ACICU_RS00385	ACICU_RS00390	ACICU_RS00500	ACICU_RS00505	ACICU_RS00510	ACICU_RS00515	ACICU_RS00520	ACICU_RS00525	ACICU_RS00535	ACICU_RS00540	ACICU_RS00545	ACICU_RS00615	ACICU_RS00620	ACICU_RS00625	ACICU_RS00630	ACICU_RS00635	ACICU_RS00640	ACICU_RS00645	ACICU_RS00650	ACICU_RS00655	ACICU_RS00660	ACICU_RS00665	ACICU_RS00670	ACICU_RS00675	ACICU_RS00680	ACICU_RS00685	ACICU_RS00690	ACICU_RS00695	ACICU_RS00705	ACICU_RS00785	ACICU_RS00790	ACICU_RS00795	ACICU_RS00800	ACICU_RS00805	ACICU_RS00810	ACICU_RS00815	ACICU_RS00820	ACICU_RS00825	ACICU_RS00830	ACICU_RS00835	ACICU_RS00840	ACICU_RS00845	ACICU_RS00850	ACICU_RS00855	ACICU_RS00860	ACICU_RS00865	ACICU_RS00870	ACICU_RS00875	ACICU_RS00880	ACICU_RS00890	ACICU_RS00895	ACICU_RS00900	ACICU_RS00905	ACICU_RS00910	ACICU_RS00915	ACICU_RS00920	ACICU_RS00925	ACICU_RS00930	ACICU_RS00935	ACICU_RS00945	ACICU_RS00950	ACICU_RS00955	ACICU_RS00960	ACICU_RS00965	ACICU_RS00970	ACICU_RS00975	ACICU_RS00980	ACICU_RS00985	ACICU_RS00990	ACICU_RS00995	ACICU_RS01010	ACICU_RS01015	ACICU_RS01045	ACICU_RS01050	ACICU_RS01055	ACICU_RS01065	ACICU_RS01070	ACICU_RS01075	ACICU_RS01080	ACICU_RS01085	ACICU_RS01090	ACICU_RS01095	ACICU_RS01100	ACICU_RS01105	ACICU_RS01110	ACICU_RS01115	ACICU_RS01120	ACICU_RS01125	ACICU_RS01130	ACICU_RS01135	ACICU_RS01140	ACICU_RS01145	ACICU_RS01150	ACICU_RS01155	ACICU_RS01285	ACICU_RS01290	ACICU_RS01295	ACICU_RS01300	ACICU_RS01305	ACICU_RS01310	ACICU_RS01315	ACICU_RS01320	ACICU_RS01325	ACICU_RS01335	ACICU_RS01340	ACICU_RS01345	ACICU_RS01350	ACICU_RS01355	ACICU_RS01360	ACICU_RS01370	ACICU_RS01375	ACICU_RS01380	ACICU_RS01390	ACICU_RS01395	ACICU_RS01400	ACICU_RS01405	ACICU_RS01410	ACICU_RS01415	ACICU_RS01420	ACICU_RS01425	ACICU_RS01430	ACICU_RS01435	ACICU_RS01440	ACICU_RS01450	ACICU_RS01460	ACICU_RS01465	ACICU_RS01470	ACICU_RS01475	ACICU_RS01480	ACICU_RS01490	ACICU_RS01495	ACICU_RS01500	ACICU_RS01505	ACICU_RS01510	ACICU_RS01515	ACICU_RS01520	ACICU_RS01525	ACICU_RS01530	ACICU_RS01535	ACICU_RS01540	ACICU_RS01545	ACICU_RS01550	ACICU_RS01585	ACICU_RS01590	ACICU_RS01595	ACICU_RS01600	ACICU_RS01605	ACICU_RS01610	ACICU_RS01615	ACICU_RS01620	ACICU_RS01625	ACICU_RS01630	ACICU_RS01635	ACICU_RS01640	ACICU_RS01645	ACICU_RS01660	ACICU_RS01665	ACICU_RS01670	ACICU_RS01675	ACICU_RS01685	ACICU_RS01690	ACICU_RS01705	ACICU_RS01710	ACICU_RS01715	ACICU_RS01730	ACICU_RS01735	ACICU_RS01740	ACICU_RS01745	ACICU_RS01750	ACICU_RS01755	ACICU_RS01760	ACICU_RS01770	ACICU_RS01775	ACICU_RS01780	ACICU_RS01785	ACICU_RS01790	ACICU_RS01795	ACICU_RS01800	ACICU_RS01805	ACICU_RS01810	ACICU_RS01815	ACICU_RS01820	ACICU_RS01825	ACICU_RS01830	ACICU_RS01860	ACICU_RS01865	ACICU_RS01870	ACICU_RS01875	ACICU_RS01880	ACICU_RS01885	ACICU_RS01890	ACICU_RS01895	ACICU_RS01900	ACICU_RS01905	ACICU_RS01910	ACICU_RS01920	ACICU_RS01925	ACICU_RS01930	ACICU_RS01935	ACICU_RS01940	ACICU_RS01945	ACICU_RS01950	ACICU_RS01955	ACICU_RS01960	ACICU_RS01965	ACICU_RS01970	ACICU_RS01975	ACICU_RS01980	ACICU_RS01990	ACICU_RS01995	ACICU_RS02000	ACICU_RS02005	ACICU_RS02010	ACICU_RS02015	ACICU_RS02020	ACICU_RS02025	ACICU_RS02030	ACICU_RS02035	ACICU_RS02040	ACICU_RS02045	ACICU_RS02050	ACICU_RS02055	ACICU_RS02060	ACICU_RS02065	ACICU_RS02075	ACICU_RS02080	ACICU_RS02085	ACICU_RS02095	ACICU_RS02100	ACICU_RS02105	ACICU_RS02110	ACICU_RS02115	ACICU_RS02120	ACICU_RS02125	ACICU_RS02130	ACICU_RS02135	ACICU_RS02140	ACICU_RS02145	ACICU_RS02150	ACICU_RS02170	ACICU_RS02175	ACICU_RS02180	ACICU_RS02185	ACICU_RS02190	ACICU_RS02195	ACICU_RS02200	ACICU_RS02205	ACICU_RS02210	ACICU_RS02215	ACICU_RS02220	ACICU_RS02225	ACICU_RS02230	ACICU_RS02245	ACICU_RS02250	ACICU_RS02255	ACICU_RS02265	ACICU_RS02270	ACICU_RS02285	ACICU_RS02290	ACICU_RS02295	ACICU_RS02300	ACICU_RS02305	ACICU_RS02310	ACICU_RS02315	ACICU_RS02320	ACICU_RS02325	ACICU_RS02330	ACICU_RS02335	ACICU_RS02340	ACICU_RS02345	ACICU_RS02350	ACICU_RS02355	ACICU_RS02360	ACICU_RS02365	ACICU_RS02370	ACICU_RS02375	ACICU_RS02380	ACICU_RS02385	ACICU_RS02390	ACICU_RS02395	ACICU_RS02400	ACICU_RS02405	ACICU_RS02410	ACICU_RS02415	ACICU_RS02420	ACICU_RS02430	ACICU_RS02435	ACICU_RS02440	ACICU_RS02445	ACICU_RS02450	ACICU_RS02455	ACICU_RS02460	ACICU_RS02475	ACICU_RS02480	ACICU_RS02485	ACICU_RS02490	ACICU_RS02500	ACICU_RS02505	ACICU_RS02510	ACICU_RS02515	ACICU_RS02520	ACICU_RS02525	ACICU_RS02530	ACICU_RS02535	ACICU_RS02540	ACICU_RS02545	ACICU_RS02560	ACICU_RS02565	ACICU_RS02570	ACICU_RS02575	ACICU_RS02580	ACICU_RS02585	ACICU_RS02590	ACICU_RS02595	ACICU_RS02600	ACICU_RS02605	ACICU_RS02610	ACICU_RS02615	ACICU_RS02620	ACICU_RS02625	ACICU_RS02630	ACICU_RS02635	ACICU_RS02640	ACICU_RS02645	ACICU_RS02650	ACICU_RS02655	ACICU_RS02660	ACICU_RS02665	ACICU_RS02670	ACICU_RS02680	ACICU_RS02685	ACICU_RS02690	ACICU_RS02695	ACICU_RS02705	ACICU_RS02810	ACICU_RS02815	ACICU_RS02820	ACICU_RS02825	ACICU_RS02830	ACICU_RS02835	ACICU_RS02840	ACICU_RS02845	ACICU_RS02850	ACICU_RS02855	ACICU_RS02860	ACICU_RS02865	ACICU_RS02870	ACICU_RS02875	ACICU_RS02880	ACICU_RS02885	ACICU_RS02890	ACICU_RS02915	ACICU_RS02920	ACICU_RS02925	ACICU_RS02930	ACICU_RS02935	ACICU_RS02950	ACICU_RS02965	ACICU_RS02970	ACICU_RS02975	ACICU_RS02980	ACICU_RS02985	ACICU_RS02990	ACICU_RS02995	ACICU_RS03000	ACICU_RS03005	ACICU_RS03010	ACICU_RS03015	ACICU_RS03020	ACICU_RS03025	ACICU_RS03030	ACICU_RS03035	ACICU_RS03040	ACICU_RS03045	ACICU_RS03050	ACICU_RS03060	ACICU_RS03065	ACICU_RS03070	ACICU_RS03075	ACICU_RS03080	ACICU_RS03085	ACICU_RS03090	ACICU_RS03095	ACICU_RS03100	ACICU_RS03105	ACICU_RS03110	ACICU_RS03115	ACICU_RS03120	ACICU_RS03125	ACICU_RS03130	ACICU_RS03145	ACICU_RS03150	ACICU_RS03155	ACICU_RS03160	ACICU_RS03170	ACICU_RS03175	ACICU_RS03180	ACICU_RS03185	ACICU_RS03200	ACICU_RS03205	ACICU_RS03220	ACICU_RS03225	ACICU_RS03230	ACICU_RS03235	ACICU_RS03240	ACICU_RS03245	ACICU_RS03250	ACICU_RS03255	ACICU_RS03260	ACICU_RS03290	ACICU_RS03295	ACICU_RS03300	ACICU_RS03305	ACICU_RS03310	ACICU_RS03315	ACICU_RS03320	ACICU_RS03325	ACICU_RS03360	ACICU_RS03365	ACICU_RS03370	ACICU_RS03375	ACICU_RS03380	ACICU_RS03385	ACICU_RS03395	ACICU_RS03405	ACICU_RS03410	ACICU_RS03415	ACICU_RS03425	ACICU_RS03430	ACICU_RS03435	ACICU_RS03440	ACICU_RS03445	ACICU_RS03470	ACICU_RS03475	ACICU_RS03480	ACICU_RS03485	ACICU_RS03490	ACICU_RS03495	ACICU_RS03505	ACICU_RS03510	ACICU_RS03515	ACICU_RS03520	ACICU_RS03525	ACICU_RS03560	ACICU_RS03565	ACICU_RS03570	ACICU_RS03700	ACICU_RS03705	ACICU_RS03710	ACICU_RS03715	ACICU_RS03720	ACICU_RS03725	ACICU_RS03730	ACICU_RS03735	ACICU_RS03740	ACICU_RS03745	ACICU_RS03750	ACICU_RS03755	ACICU_RS03760	ACICU_RS03765	ACICU_RS03770	ACICU_RS03775	ACICU_RS03780	ACICU_RS03785	ACICU_RS03790	ACICU_RS03795	ACICU_RS03800	ACICU_RS03805	ACICU_RS03810	ACICU_RS03815	ACICU_RS03820	ACICU_RS03825	ACICU_RS03835	ACICU_RS03840	ACICU_RS03845	ACICU_RS03865	ACICU_RS03870	ACICU_RS03875	ACICU_RS03880	ACICU_RS03885	ACICU_RS03890	ACICU_RS03895	ACICU_RS03900	ACICU_RS03905	ACICU_RS03910	ACICU_RS03925	ACICU_RS03930	ACICU_RS03940	ACICU_RS03945	ACICU_RS03950	ACICU_RS03960	ACICU_RS03965	ACICU_RS03970	ACICU_RS03975	ACICU_RS03980	ACICU_RS03985	ACICU_RS03990	ACICU_RS03995	ACICU_RS04000	ACICU_RS04010	ACICU_RS04015	ACICU_RS04020	ACICU_RS04025	ACICU_RS04030	ACICU_RS04035	ACICU_RS04040	ACICU_RS04045	ACICU_RS04050	ACICU_RS04055	ACICU_RS04060	ACICU_RS04065	ACICU_RS04070	ACICU_RS04075	ACICU_RS04080	ACICU_RS04085	ACICU_RS04090	ACICU_RS04095	ACICU_RS04100	ACICU_RS04105	ACICU_RS04110	ACICU_RS04115	ACICU_RS04120	ACICU_RS04125	ACICU_RS04130	ACICU_RS04140	ACICU_RS04145	ACICU_RS04150	ACICU_RS04155	ACICU_RS04160	ACICU_RS04165	ACICU_RS04170	ACICU_RS04175	ACICU_RS04180	ACICU_RS04190	ACICU_RS04195	ACICU_RS04205	ACICU_RS04210	ACICU_RS04220	ACICU_RS04225	ACICU_RS04235	ACICU_RS04240	ACICU_RS04255	ACICU_RS04260	ACICU_RS04265	ACICU_RS04270	ACICU_RS04275	ACICU_RS04280	ACICU_RS04285	ACICU_RS04290	ACICU_RS04295	ACICU_RS04310	ACICU_RS04315	ACICU_RS04320	ACICU_RS04325	ACICU_RS04330	ACICU_RS04335	ACICU_RS04340	ACICU_RS04350	ACICU_RS04355	ACICU_RS04360	ACICU_RS04365	ACICU_RS04370	ACICU_RS04375	ACICU_RS04380	ACICU_RS04385	ACICU_RS04390	ACICU_RS04395	ACICU_RS04400	ACICU_RS04405	ACICU_RS04410	ACICU_RS04420	ACICU_RS04425	ACICU_RS04430	ACICU_RS04435	ACICU_RS04440	ACICU_RS04445	ACICU_RS04450	ACICU_RS04455	ACICU_RS04460	ACICU_RS04465	ACICU_RS04470	ACICU_RS04475	ACICU_RS04485	ACICU_RS04490	ACICU_RS04495	ACICU_RS04500	ACICU_RS04505	ACICU_RS04540	ACICU_RS04550	ACICU_RS04555	ACICU_RS04560	ACICU_RS04565	ACICU_RS04610	ACICU_RS04615	ACICU_RS04620	ACICU_RS04625	ACICU_RS04630	ACICU_RS04635	ACICU_RS04640	ACICU_RS04645	ACICU_RS04650	ACICU_RS04660	ACICU_RS04665	ACICU_RS04670	ACICU_RS04675	ACICU_RS04680	ACICU_RS04685	ACICU_RS04690	ACICU_RS04695	ACICU_RS04700	ACICU_RS04705	ACICU_RS04710	ACICU_RS04715	ACICU_RS04720	ACICU_RS04725	ACICU_RS04730	ACICU_RS04735	ACICU_RS04745	ACICU_RS04750	ACICU_RS04760	ACICU_RS04765	ACICU_RS04770	ACICU_RS04775	ACICU_RS04780	ACICU_RS04785	ACICU_RS04790	ACICU_RS04795	ACICU_RS04800	ACICU_RS04805	ACICU_RS04810	ACICU_RS04815	ACICU_RS04820	ACICU_RS04835	ACICU_RS04870	ACICU_RS04875	ACICU_RS04880	ACICU_RS04885	ACICU_RS04890	ACICU_RS04895	ACICU_RS04900	ACICU_RS04905	ACICU_RS04910	ACICU_RS04920	ACICU_RS04930	ACICU_RS04950	ACICU_RS04955	ACICU_RS04960	ACICU_RS04965	ACICU_RS04970	ACICU_RS04980	ACICU_RS04985	ACICU_RS04990	ACICU_RS04995	ACICU_RS05000	ACICU_RS05010	ACICU_RS05015	ACICU_RS05020	ACICU_RS05025	ACICU_RS05030	ACICU_RS05040	ACICU_RS05045	ACICU_RS05050	ACICU_RS05055	ACICU_RS05060	ACICU_RS05065	ACICU_RS05070	ACICU_RS05075	ACICU_RS05090	ACICU_RS05095	ACICU_RS05100	ACICU_RS05105	ACICU_RS05110	ACICU_RS05115	ACICU_RS05120	ACICU_RS05125	ACICU_RS05130	ACICU_RS05135	ACICU_RS05140	ACICU_RS05145	ACICU_RS05150	ACICU_RS05155	ACICU_RS05160	ACICU_RS05180	ACICU_RS05185	ACICU_RS05555	ACICU_RS05560	ACICU_RS05575	ACICU_RS05580	ACICU_RS05585	ACICU_RS05590	ACICU_RS05595	ACICU_RS05600	ACICU_RS05605	ACICU_RS05610	ACICU_RS05615	ACICU_RS05620	ACICU_RS05625	ACICU_RS05630	ACICU_RS05635	ACICU_RS05640	ACICU_RS05645	ACICU_RS05650	ACICU_RS05655	ACICU_RS05660	ACICU_RS05670	ACICU_RS05675	ACICU_RS05695	ACICU_RS05705	ACICU_RS05865	ACICU_RS05870	ACICU_RS05890	ACICU_RS05895	ACICU_RS05900	ACICU_RS05905	ACICU_RS05910	ACICU_RS05915	ACICU_RS05920	ACICU_RS05925	ACICU_RS05930	ACICU_RS05935	ACICU_RS05940	ACICU_RS05945	ACICU_RS05950	ACICU_RS05955	ACICU_RS05960	ACICU_RS05970	ACICU_RS05980	ACICU_RS05985	ACICU_RS05990	ACICU_RS05995	ACICU_RS06000	ACICU_RS06010	ACICU_RS06015	ACICU_RS06020	ACICU_RS06025	ACICU_RS06030	ACICU_RS06035	ACICU_RS06040	ACICU_RS06045	ACICU_RS06050	ACICU_RS06060	ACICU_RS06065	ACICU_RS06070	ACICU_RS06075	ACICU_RS06080	ACICU_RS06085	ACICU_RS06090	ACICU_RS06095	ACICU_RS06100	ACICU_RS06105	ACICU_RS06110	ACICU_RS06130	ACICU_RS06135	ACICU_RS06140	ACICU_RS06145	ACICU_RS06150	ACICU_RS06155	ACICU_RS06160	ACICU_RS06165	ACICU_RS06175	ACICU_RS06185	ACICU_RS06190	ACICU_RS06195	ACICU_RS06200	ACICU_RS06205	ACICU_RS06210	ACICU_RS06220	ACICU_RS06225	ACICU_RS06245	ACICU_RS06255	ACICU_RS06265	ACICU_RS06280	ACICU_RS06285	ACICU_RS06290	ACICU_RS06300	ACICU_RS06305	ACICU_RS06315	ACICU_RS06320	ACICU_RS06330	ACICU_RS06335	ACICU_RS06340	ACICU_RS06345	ACICU_RS06350	ACICU_RS06355	ACICU_RS06360	ACICU_RS06385	ACICU_RS06390	ACICU_RS06395	ACICU_RS06400	ACICU_RS06405	ACICU_RS06410	ACICU_RS06425	ACICU_RS06430	ACICU_RS06435	ACICU_RS06445	ACICU_RS06470	ACICU_RS06475	ACICU_RS06480	ACICU_RS06485	ACICU_RS06495	ACICU_RS06500	ACICU_RS06905	ACICU_RS06965	ACICU_RS06970	ACICU_RS06975	ACICU_RS06980	ACICU_RS06985	ACICU_RS06990	ACICU_RS07000	ACICU_RS07015	ACICU_RS07020	ACICU_RS07025	ACICU_RS07030	ACICU_RS07035	ACICU_RS07040	ACICU_RS07055	ACICU_RS07060	ACICU_RS07065	ACICU_RS07070	ACICU_RS07075	ACICU_RS07080	ACICU_RS07085	ACICU_RS07090	ACICU_RS07095	ACICU_RS07100	ACICU_RS07110	ACICU_RS07115	ACICU_RS07120	ACICU_RS07125	ACICU_RS07130	ACICU_RS07135	ACICU_RS07140	ACICU_RS07145	ACICU_RS07150	ACICU_RS07155	ACICU_RS07160	ACICU_RS07165	ACICU_RS07170	ACICU_RS07195	ACICU_RS07200	ACICU_RS07205	ACICU_RS07210	ACICU_RS07225	ACICU_RS07230	ACICU_RS07235	ACICU_RS07240	ACICU_RS07250	ACICU_RS07255	ACICU_RS07260	ACICU_RS07265	ACICU_RS07270	ACICU_RS07275	ACICU_RS07280	ACICU_RS07285	ACICU_RS07295	ACICU_RS07300	ACICU_RS07305	ACICU_RS07310	ACICU_RS07320	ACICU_RS07325	ACICU_RS07335	ACICU_RS07340	ACICU_RS07345	ACICU_RS07350	ACICU_RS07355	ACICU_RS07360	ACICU_RS07365	ACICU_RS07370	ACICU_RS07375	ACICU_RS07380	ACICU_RS07385	ACICU_RS07390	ACICU_RS07405	ACICU_RS07415	ACICU_RS07420	ACICU_RS07445	ACICU_RS07450	ACICU_RS07455	ACICU_RS07465	ACICU_RS07475	ACICU_RS07545	ACICU_RS07550	ACICU_RS07555	ACICU_RS07560	ACICU_RS07565	ACICU_RS07570	ACICU_RS07575	ACICU_RS07585	ACICU_RS07590	ACICU_RS07600	ACICU_RS07605	ACICU_RS07610	ACICU_RS07615	ACICU_RS07620	ACICU_RS07625	ACICU_RS07630	ACICU_RS07635	ACICU_RS07640	ACICU_RS07645	ACICU_RS07650	ACICU_RS07655	ACICU_RS07665	ACICU_RS07680	ACICU_RS07685	ACICU_RS07690	ACICU_RS07695	ACICU_RS07705	ACICU_RS07710	ACICU_RS07715	ACICU_RS07725	ACICU_RS07730	ACICU_RS07735	ACICU_RS07740	ACICU_RS07745	ACICU_RS07750	ACICU_RS07755	ACICU_RS07760	ACICU_RS07765	ACICU_RS07770	ACICU_RS07775	ACICU_RS07785	ACICU_RS07795	ACICU_RS07800	ACICU_RS07805	ACICU_RS07810	ACICU_RS07820	ACICU_RS07825	ACICU_RS07830	ACICU_RS07835	ACICU_RS07845	ACICU_RS07850	ACICU_RS07860	ACICU_RS07865	ACICU_RS07870	ACICU_RS07875	ACICU_RS07880	ACICU_RS07885	ACICU_RS07890	ACICU_RS07895	ACICU_RS07900	ACICU_RS07905	ACICU_RS07910	ACICU_RS07915	ACICU_RS07920	ACICU_RS07925	ACICU_RS07930	ACICU_RS07935	ACICU_RS07945	ACICU_RS07950	ACICU_RS07955	ACICU_RS07960	ACICU_RS07965	ACICU_RS07970	ACICU_RS07975	ACICU_RS07980	ACICU_RS07985	ACICU_RS07990	ACICU_RS07995	ACICU_RS08000	ACICU_RS08010	ACICU_RS08015	ACICU_RS08025	ACICU_RS08030	ACICU_RS08035	ACICU_RS08040	ACICU_RS08045	ACICU_RS08050	ACICU_RS08055	ACICU_RS08060	ACICU_RS08065	ACICU_RS08070	ACICU_RS08075	ACICU_RS08080	ACICU_RS08085	ACICU_RS08090	ACICU_RS08095	ACICU_RS08100	ACICU_RS08105	ACICU_RS08110	ACICU_RS08115	ACICU_RS08120	ACICU_RS08125	ACICU_RS08130	ACICU_RS08135	ACICU_RS08150	ACICU_RS08155	ACICU_RS08160	ACICU_RS08165	ACICU_RS08175	ACICU_RS08180	ACICU_RS08185	ACICU_RS08190	ACICU_RS08195	ACICU_RS08200	ACICU_RS08205	ACICU_RS08220	ACICU_RS08225	ACICU_RS08235	ACICU_RS08240	ACICU_RS08245	ACICU_RS08260	ACICU_RS08285	ACICU_RS08290	ACICU_RS08295	ACICU_RS08300	ACICU_RS08305	ACICU_RS08310	ACICU_RS08315	ACICU_RS08320	ACICU_RS08325	ACICU_RS08330	ACICU_RS08335	ACICU_RS08340	ACICU_RS08345	ACICU_RS08355	ACICU_RS08360	ACICU_RS08365	ACICU_RS08370	ACICU_RS08375	ACICU_RS08380	ACICU_RS08385	ACICU_RS08390	ACICU_RS08395	ACICU_RS08400	ACICU_RS08405	ACICU_RS08410	ACICU_RS08415	ACICU_RS08420	ACICU_RS08425	ACICU_RS08430	ACICU_RS08435	ACICU_RS08440	ACICU_RS08445	ACICU_RS08455	ACICU_RS08460	ACICU_RS08465	ACICU_RS08470	ACICU_RS08480	ACICU_RS08485	ACICU_RS08490	ACICU_RS08495	ACICU_RS08500	ACICU_RS08505	ACICU_RS08510	ACICU_RS08520	ACICU_RS08530	ACICU_RS08535	ACICU_RS08540	ACICU_RS08545	ACICU_RS08555	ACICU_RS08600	ACICU_RS08610	ACICU_RS08615	ACICU_RS08620	ACICU_RS08625	ACICU_RS08630	ACICU_RS08635	ACICU_RS08640	ACICU_RS08645	ACICU_RS08655	ACICU_RS08660	ACICU_RS08665	ACICU_RS08670	ACICU_RS08675	ACICU_RS08680	ACICU_RS08685	ACICU_RS08690	ACICU_RS08695	ACICU_RS08705	ACICU_RS08710	ACICU_RS08715	ACICU_RS08720	ACICU_RS08725	ACICU_RS08730	ACICU_RS08740	ACICU_RS08745	ACICU_RS08755	ACICU_RS08760	ACICU_RS08765	ACICU_RS08770	ACICU_RS08775	ACICU_RS08780	ACICU_RS08785	ACICU_RS08790	ACICU_RS08795	ACICU_RS08800	ACICU_RS08805	ACICU_RS08810	ACICU_RS08815	ACICU_RS08820	ACICU_RS08825	ACICU_RS08830	ACICU_RS08835	ACICU_RS08845	ACICU_RS08850	ACICU_RS08855	ACICU_RS08860	ACICU_RS08865	ACICU_RS08870	ACICU_RS08880	ACICU_RS08890	ACICU_RS08895	ACICU_RS08900	ACICU_RS08910	ACICU_RS08915	ACICU_RS08920	ACICU_RS08925	ACICU_RS08935	ACICU_RS08945	ACICU_RS08950	ACICU_RS08955	ACICU_RS08965	ACICU_RS08970	ACICU_RS08975	ACICU_RS08980	ACICU_RS08985	ACICU_RS08990	ACICU_RS08995	ACICU_RS09000	ACICU_RS09005	ACICU_RS09010	ACICU_RS09015	ACICU_RS09020	ACICU_RS09025	ACICU_RS09030	ACICU_RS09035	ACICU_RS09040	ACICU_RS09045	ACICU_RS09050	ACICU_RS09055	ACICU_RS09060	ACICU_RS09065	ACICU_RS09070	ACICU_RS09080	ACICU_RS09085	ACICU_RS09090	ACICU_RS09110	ACICU_RS09120	ACICU_RS09200	ACICU_RS09280	ACICU_RS09285	ACICU_RS09300	ACICU_RS09305	ACICU_RS09310	ACICU_RS09315	ACICU_RS09320	ACICU_RS09405	ACICU_RS09650	ACICU_RS09655	ACICU_RS09795	ACICU_RS09800	ACICU_RS09805	ACICU_RS09810	ACICU_RS09815	ACICU_RS09870	ACICU_RS09875	ACICU_RS09880	ACICU_RS09885	ACICU_RS09890	ACICU_RS09895	ACICU_RS09900	ACICU_RS09905	ACICU_RS09910	ACICU_RS09915	ACICU_RS09920	ACICU_RS09925	ACICU_RS09930	ACICU_RS09935	ACICU_RS09940	ACICU_RS09945	ACICU_RS09950	ACICU_RS09960	ACICU_RS09965	ACICU_RS09970	ACICU_RS09975	ACICU_RS09980	ACICU_RS09985	ACICU_RS09990	ACICU_RS09995	ACICU_RS10000	ACICU_RS10010	ACICU_RS10015	ACICU_RS10020	ACICU_RS10025	ACICU_RS10030	ACICU_RS10035	ACICU_RS10040	ACICU_RS10060	ACICU_RS10070	ACICU_RS10075	ACICU_RS10080	ACICU_RS10085	ACICU_RS10090	ACICU_RS10095	ACICU_RS10100	ACICU_RS10105	ACICU_RS10115	ACICU_RS10120	ACICU_RS10130	ACICU_RS10135	ACICU_RS10140	ACICU_RS10150	ACICU_RS10155	ACICU_RS10160	ACICU_RS10165	ACICU_RS10170	ACICU_RS10175	ACICU_RS10180	ACICU_RS10190	ACICU_RS10195	ACICU_RS10205	ACICU_RS10210	ACICU_RS10215	ACICU_RS10230	ACICU_RS10235	ACICU_RS10240	ACICU_RS10245	ACICU_RS10250	ACICU_RS10260	ACICU_RS10265	ACICU_RS10270	ACICU_RS10275	ACICU_RS10280	ACICU_RS10285	ACICU_RS10290	ACICU_RS10295	ACICU_RS10300	ACICU_RS10305	ACICU_RS10310	ACICU_RS10315	ACICU_RS10320	ACICU_RS10325	ACICU_RS10330	ACICU_RS10335	ACICU_RS10340	ACICU_RS10345	ACICU_RS10350	ACICU_RS10375	ACICU_RS10380	ACICU_RS10385	ACICU_RS10390	ACICU_RS10395	ACICU_RS10400	ACICU_RS10405	ACICU_RS10410	ACICU_RS10430	ACICU_RS10435	ACICU_RS10440	ACICU_RS10445	ACICU_RS10450	ACICU_RS10455	ACICU_RS10460	ACICU_RS10470	ACICU_RS10475	ACICU_RS10480	ACICU_RS10485	ACICU_RS10490	ACICU_RS10495	ACICU_RS10500	ACICU_RS10510	ACICU_RS10515	ACICU_RS10520	ACICU_RS10525	ACICU_RS10535	ACICU_RS10540	ACICU_RS10550	ACICU_RS10560	ACICU_RS10565	ACICU_RS10570	ACICU_RS10575	ACICU_RS10580	ACICU_RS10585	ACICU_RS10595	ACICU_RS10600	ACICU_RS10605	ACICU_RS10610	ACICU_RS10615	ACICU_RS10620	ACICU_RS10625	ACICU_RS10640	ACICU_RS10645	ACICU_RS10650	ACICU_RS10655	ACICU_RS10670	ACICU_RS10675	ACICU_RS10680	ACICU_RS10685	ACICU_RS10690	ACICU_RS10695	ACICU_RS10700	ACICU_RS10705	ACICU_RS10710	ACICU_RS10715	ACICU_RS10720	ACICU_RS10725	ACICU_RS10730	ACICU_RS10735	ACICU_RS11200	ACICU_RS11205	ACICU_RS11210	ACICU_RS11215	ACICU_RS11220	ACICU_RS11225	ACICU_RS11230	ACICU_RS11235	ACICU_RS11240	ACICU_RS11245	ACICU_RS11250	ACICU_RS11255	ACICU_RS11265	ACICU_RS11270	ACICU_RS11275	ACICU_RS11280	ACICU_RS11285	ACICU_RS11290	ACICU_RS11295	ACICU_RS11305	ACICU_RS11315	ACICU_RS11320	ACICU_RS11325	ACICU_RS11335	ACICU_RS11345	ACICU_RS11350	ACICU_RS11365	ACICU_RS11370	ACICU_RS11375	ACICU_RS11380	ACICU_RS11385	ACICU_RS11390	ACICU_RS11395	ACICU_RS11400	ACICU_RS11405	ACICU_RS11420	ACICU_RS11425	ACICU_RS11430	ACICU_RS11435	ACICU_RS11445	ACICU_RS11450	ACICU_RS11455	ACICU_RS11460	ACICU_RS11465	ACICU_RS11475	ACICU_RS11480	ACICU_RS11485	ACICU_RS11490	ACICU_RS11495	ACICU_RS11500	ACICU_RS11505	ACICU_RS11510	ACICU_RS11515	ACICU_RS11520	ACICU_RS11525	ACICU_RS11530	ACICU_RS11535	ACICU_RS11545	ACICU_RS11560	ACICU_RS11565	ACICU_RS11575	ACICU_RS11580	ACICU_RS11590	ACICU_RS11595	ACICU_RS11610	ACICU_RS11620	ACICU_RS11625	ACICU_RS11630	ACICU_RS11635	ACICU_RS11640	ACICU_RS11650	ACICU_RS11660	ACICU_RS11665	ACICU_RS11670	ACICU_RS11675	ACICU_RS11680	ACICU_RS11685	ACICU_RS11690	ACICU_RS11695	ACICU_RS11700	ACICU_RS11710	ACICU_RS11715	ACICU_RS11720	ACICU_RS11725	ACICU_RS11730	ACICU_RS11735	ACICU_RS11755	ACICU_RS11760	ACICU_RS11765	ACICU_RS11770	ACICU_RS11775	ACICU_RS11780	ACICU_RS11785	ACICU_RS11790	ACICU_RS11795	ACICU_RS11800	ACICU_RS11805	ACICU_RS11815	ACICU_RS11820	ACICU_RS11825	ACICU_RS11830	ACICU_RS11835	ACICU_RS11840	ACICU_RS11845	ACICU_RS11855	ACICU_RS11860	ACICU_RS11865	ACICU_RS11870	ACICU_RS11875	ACICU_RS11880	ACICU_RS11885	ACICU_RS11890	ACICU_RS11895	ACICU_RS11900	ACICU_RS11905	ACICU_RS11910	ACICU_RS11915	ACICU_RS11920	ACICU_RS11925	ACICU_RS11930	ACICU_RS11935	ACICU_RS11940	ACICU_RS11945	ACICU_RS11950	ACICU_RS11955	ACICU_RS11960	ACICU_RS11970	ACICU_RS11975	ACICU_RS12005	ACICU_RS12110	ACICU_RS12115	ACICU_RS12120	ACICU_RS12125	ACICU_RS12130	ACICU_RS12135	ACICU_RS12140	ACICU_RS12145	ACICU_RS12150	ACICU_RS12165	ACICU_RS12170	ACICU_RS12175	ACICU_RS12180	ACICU_RS12185	ACICU_RS12190	ACICU_RS12220	ACICU_RS12225	ACICU_RS12230	ACICU_RS12235	ACICU_RS12240	ACICU_RS12245	ACICU_RS12250	ACICU_RS12255	ACICU_RS12275	ACICU_RS12280	ACICU_RS12285	ACICU_RS12290	ACICU_RS12295	ACICU_RS12300	ACICU_RS12305	ACICU_RS12310	ACICU_RS12315	ACICU_RS12320	ACICU_RS12325	ACICU_RS12330	ACICU_RS12335	ACICU_RS12340	ACICU_RS12355	ACICU_RS12360	ACICU_RS12375	ACICU_RS12380	ACICU_RS12385	ACICU_RS12390	ACICU_RS12395	ACICU_RS12400	ACICU_RS12410	ACICU_RS12415	ACICU_RS12420	ACICU_RS12425	ACICU_RS12430	ACICU_RS12435	ACICU_RS12440	ACICU_RS12445	ACICU_RS12450	ACICU_RS12455	ACICU_RS12460	ACICU_RS12470	ACICU_RS12480	ACICU_RS12485	ACICU_RS12490	ACICU_RS12495	ACICU_RS12500	ACICU_RS12505	ACICU_RS12510	ACICU_RS12515	ACICU_RS12520	ACICU_RS12525	ACICU_RS12530	ACICU_RS12535	ACICU_RS12540	ACICU_RS12570	ACICU_RS12575	ACICU_RS12580	ACICU_RS12585	ACICU_RS12590	ACICU_RS12595	ACICU_RS12600	ACICU_RS12605	ACICU_RS12610	ACICU_RS12615	ACICU_RS12620	ACICU_RS12625	ACICU_RS12630	ACICU_RS12635	ACICU_RS12640	ACICU_RS12650	ACICU_RS12655	ACICU_RS12665	ACICU_RS12670	ACICU_RS12675	ACICU_RS12680	ACICU_RS12685	ACICU_RS12690	ACICU_RS12695	ACICU_RS12700	ACICU_RS12705	ACICU_RS12710	ACICU_RS12715	ACICU_RS12720	ACICU_RS12725	ACICU_RS12730	ACICU_RS12755	ACICU_RS12765	ACICU_RS12775	ACICU_RS12790	ACICU_RS12795	ACICU_RS12800	ACICU_RS12805	ACICU_RS12810	ACICU_RS12820	ACICU_RS12825	ACICU_RS12830	ACICU_RS12835	ACICU_RS12850	ACICU_RS12855	ACICU_RS12860	ACICU_RS12865	ACICU_RS12870	ACICU_RS12875	ACICU_RS12880	ACICU_RS12885	ACICU_RS12890	ACICU_RS12895	ACICU_RS12905	ACICU_RS12910	ACICU_RS12915	ACICU_RS12920	ACICU_RS12925	ACICU_RS12935	ACICU_RS12940	ACICU_RS12945	ACICU_RS12955	ACICU_RS12960	ACICU_RS12965	ACICU_RS12970	ACICU_RS12980	ACICU_RS13135	ACICU_RS13140	ACICU_RS13145	ACICU_RS13155	ACICU_RS13160	ACICU_RS13165	ACICU_RS13170	ACICU_RS13185	ACICU_RS13190	ACICU_RS13195	ACICU_RS13200	ACICU_RS13205	ACICU_RS13210	ACICU_RS13215	ACICU_RS13220	ACICU_RS13225	ACICU_RS13230	ACICU_RS13235	ACICU_RS13240	ACICU_RS13250	ACICU_RS13255	ACICU_RS13260	ACICU_RS13265	ACICU_RS13270	ACICU_RS13275	ACICU_RS13280	ACICU_RS13285	ACICU_RS13290	ACICU_RS13295	ACICU_RS13300	ACICU_RS13305	ACICU_RS13320	ACICU_RS13325	ACICU_RS13330	ACICU_RS13340	ACICU_RS13345	ACICU_RS13350	ACICU_RS13355	ACICU_RS13360	ACICU_RS13365	ACICU_RS13375	ACICU_RS13380	ACICU_RS13390	ACICU_RS13395	ACICU_RS13400	ACICU_RS13405	ACICU_RS13410	ACICU_RS13415	ACICU_RS13420	ACICU_RS13425	ACICU_RS13430	ACICU_RS13435	ACICU_RS13440	ACICU_RS13445	ACICU_RS13450	ACICU_RS13455	ACICU_RS13460	ACICU_RS13470	ACICU_RS13485	ACICU_RS13490	ACICU_RS13495	ACICU_RS13500	ACICU_RS13505	ACICU_RS13840	ACICU_RS13850	ACICU_RS13855	ACICU_RS13860	ACICU_RS13865	ACICU_RS13870	ACICU_RS13875	ACICU_RS13880	ACICU_RS13885	ACICU_RS13890	ACICU_RS13895	ACICU_RS13900	ACICU_RS13905	ACICU_RS13915	ACICU_RS13920	ACICU_RS13930	ACICU_RS13935	ACICU_RS13940	ACICU_RS13945	ACICU_RS13950	ACICU_RS13955	ACICU_RS13960	ACICU_RS13970	ACICU_RS13975	ACICU_RS13980	ACICU_RS13985	ACICU_RS13990	ACICU_RS13995	ACICU_RS14000	ACICU_RS14005	ACICU_RS14010	ACICU_RS14015	ACICU_RS14020	ACICU_RS14025	ACICU_RS14030	ACICU_RS14035	ACICU_RS14040	ACICU_RS14050	ACICU_RS14055	ACICU_RS14060	ACICU_RS14065	ACICU_RS14070	ACICU_RS14075	ACICU_RS14080	ACICU_RS14085	ACICU_RS14090	ACICU_RS14095	ACICU_RS14100	ACICU_RS14105	ACICU_RS14110	ACICU_RS14115	ACICU_RS14120	ACICU_RS14125	ACICU_RS14135	ACICU_RS14140	ACICU_RS14145	ACICU_RS14155	ACICU_RS14160	ACICU_RS14165	ACICU_RS14170	ACICU_RS14175	ACICU_RS14180	ACICU_RS14190	ACICU_RS14205	ACICU_RS14210	ACICU_RS14215	ACICU_RS14220	ACICU_RS14225	ACICU_RS14230	ACICU_RS14250	ACICU_RS14255	ACICU_RS14260	ACICU_RS14265	ACICU_RS14270	ACICU_RS14275	ACICU_RS14280	ACICU_RS14285	ACICU_RS14290	ACICU_RS14295	ACICU_RS14300	ACICU_RS14305	ACICU_RS14310	ACICU_RS14315	ACICU_RS14320	ACICU_RS14325	ACICU_RS14330	ACICU_RS14340	ACICU_RS14345	ACICU_RS14350	ACICU_RS14355	ACICU_RS14360	ACICU_RS14365	ACICU_RS14370	ACICU_RS14375	ACICU_RS14380	ACICU_RS14385	ACICU_RS14390	ACICU_RS14395	ACICU_RS14400	ACICU_RS14410	ACICU_RS14435	ACICU_RS14440	ACICU_RS14450	ACICU_RS14455	ACICU_RS14460	ACICU_RS14465	ACICU_RS14470	ACICU_RS14475	ACICU_RS14480	ACICU_RS14485	ACICU_RS14490	ACICU_RS14495	ACICU_RS14500	ACICU_RS14510	ACICU_RS14525	ACICU_RS14530	ACICU_RS14535	ACICU_RS14540	ACICU_RS14545	ACICU_RS14550	ACICU_RS14555	ACICU_RS14560	ACICU_RS14585	ACICU_RS14590	ACICU_RS14595	ACICU_RS14600	ACICU_RS14605	ACICU_RS14610	ACICU_RS14615	ACICU_RS14625	ACICU_RS14630	ACICU_RS14635	ACICU_RS14640	ACICU_RS14645	ACICU_RS14650	ACICU_RS14660	ACICU_RS14700	ACICU_RS14705	ACICU_RS14710	ACICU_RS14715	ACICU_RS14720	ACICU_RS14725	ACICU_RS14730	ACICU_RS14735	ACICU_RS14740	ACICU_RS14745	ACICU_RS14750	ACICU_RS14755	ACICU_RS14760	ACICU_RS14765	ACICU_RS14770	ACICU_RS14775	ACICU_RS14795	ACICU_RS14800	ACICU_RS14805	ACICU_RS14810	ACICU_RS14815	ACICU_RS14820	ACICU_RS14825	ACICU_RS14830	ACICU_RS14835	ACICU_RS14845	ACICU_RS14850	ACICU_RS14855	ACICU_RS14860	ACICU_RS14865	ACICU_RS14870	ACICU_RS14875	ACICU_RS14880	ACICU_RS14885	ACICU_RS14890	ACICU_RS14900	ACICU_RS14905	ACICU_RS14910	ACICU_RS14915	ACICU_RS14920	ACICU_RS14925	ACICU_RS14930	ACICU_RS14935	ACICU_RS14940	ACICU_RS14955	ACICU_RS14960	ACICU_RS14965	ACICU_RS14970	ACICU_RS14995	ACICU_RS15000	ACICU_RS15005	ACICU_RS15010	ACICU_RS15015	ACICU_RS15020	ACICU_RS15030	ACICU_RS15035	ACICU_RS15045	ACICU_RS15050	ACICU_RS15055	ACICU_RS15060	ACICU_RS15065	ACICU_RS15070	ACICU_RS15075	ACICU_RS15080	ACICU_RS15100	ACICU_RS15105	ACICU_RS15110	ACICU_RS15115	ACICU_RS15125	ACICU_RS15130	ACICU_RS15135	ACICU_RS15140	ACICU_RS15145	ACICU_RS15155	ACICU_RS15160	ACICU_RS15165	ACICU_RS15180	ACICU_RS15185	ACICU_RS15190	ACICU_RS15195	ACICU_RS15200	ACICU_RS15205	ACICU_RS15210	ACICU_RS15215	ACICU_RS15220	ACICU_RS15225	ACICU_RS15235	ACICU_RS15240	ACICU_RS15245	ACICU_RS15250	ACICU_RS15255	ACICU_RS15260	ACICU_RS15265	ACICU_RS15270	ACICU_RS15275	ACICU_RS15280	ACICU_RS15285	ACICU_RS15290	ACICU_RS15295	ACICU_RS15300	ACICU_RS15305	ACICU_RS15310	ACICU_RS15315	ACICU_RS15320	ACICU_RS15325	ACICU_RS15330	ACICU_RS15335	ACICU_RS15340	ACICU_RS15345	ACICU_RS15360	ACICU_RS15365	ACICU_RS15370	ACICU_RS15375	ACICU_RS15380	ACICU_RS15385	ACICU_RS15390	ACICU_RS15395	ACICU_RS15400	ACICU_RS15405	ACICU_RS15410	ACICU_RS15420	ACICU_RS15425	ACICU_RS15430	ACICU_RS15435	ACICU_RS15445	ACICU_RS15450	ACICU_RS15455	ACICU_RS15465	ACICU_RS15470	ACICU_RS15485	ACICU_RS15490	ACICU_RS15500	ACICU_RS15505	ACICU_RS15510	ACICU_RS15515	ACICU_RS15520	ACICU_RS15525	ACICU_RS15530	ACICU_RS15540	ACICU_RS15545	ACICU_RS15550	ACICU_RS15555	ACICU_RS15560	ACICU_RS15570	ACICU_RS15575	ACICU_RS15595	ACICU_RS15600	ACICU_RS15605	ACICU_RS15610	ACICU_RS15615	ACICU_RS15620	ACICU_RS15625	ACICU_RS15630	ACICU_RS15635	ACICU_RS15650	ACICU_RS15655	ACICU_RS15660	ACICU_RS15665	ACICU_RS15670	ACICU_RS15675	ACICU_RS15680	ACICU_RS15730	ACICU_RS15735	ACICU_RS15740	ACICU_RS15745	ACICU_RS15770	ACICU_RS15775	ACICU_RS15780	ACICU_RS15785	ACICU_RS15790	ACICU_RS15795	ACICU_RS15800	ACICU_RS15805	ACICU_RS15810	ACICU_RS15815	ACICU_RS15820	ACICU_RS15825	ACICU_RS15830	ACICU_RS15840	ACICU_RS15845	ACICU_RS15860	ACICU_RS15865	ACICU_RS15875	ACICU_RS15915	ACICU_RS15920	ACICU_RS15925	ACICU_RS15930	ACICU_RS15935	ACICU_RS15940	ACICU_RS15945	ACICU_RS15950	ACICU_RS15955	ACICU_RS15960	ACICU_RS15965	ACICU_RS15970	ACICU_RS15975	ACICU_RS15980	ACICU_RS15985	ACICU_RS15990	ACICU_RS15995	ACICU_RS16000	ACICU_RS16050	ACICU_RS16090	ACICU_RS16095	ACICU_RS16100	ACICU_RS16105	ACICU_RS16110	ACICU_RS16115	ACICU_RS16120	ACICU_RS16125	ACICU_RS16130	ACICU_RS16135	ACICU_RS16140	ACICU_RS16145	ACICU_RS16150	ACICU_RS16155	ACICU_RS16160	ACICU_RS16165	ACICU_RS16170	ACICU_RS16175	ACICU_RS16185	ACICU_RS16190	ACICU_RS16195	ACICU_RS16230	ACICU_RS16235	ACICU_RS16240	ACICU_RS16245	ACICU_RS16250	ACICU_RS16255	ACICU_RS16260	ACICU_RS16265	ACICU_RS16270	ACICU_RS16275	ACICU_RS16280	ACICU_RS16285	ACICU_RS16290	ACICU_RS16295	ACICU_RS16300	ACICU_RS16305	ACICU_RS16310	ACICU_RS16315	ACICU_RS16320	ACICU_RS16325	ACICU_RS16330	ACICU_RS16335	ACICU_RS16340	ACICU_RS16345	ACICU_RS16350	ACICU_RS16355	ACICU_RS16360	ACICU_RS16365	ACICU_RS16370	ACICU_RS16375	ACICU_RS16380	ACICU_RS16385	ACICU_RS16390	ACICU_RS16395	ACICU_RS16400	ACICU_RS16405	ACICU_RS16410	ACICU_RS16415	ACICU_RS16420	ACICU_RS16425	ACICU_RS16430	ACICU_RS16435	ACICU_RS16440	ACICU_RS16445	ACICU_RS16450	ACICU_RS16455	ACICU_RS16460	ACICU_RS16465	ACICU_RS16470	ACICU_RS16480	ACICU_RS16485	ACICU_RS16495	ACICU_RS16500	ACICU_RS16505	ACICU_RS16510	ACICU_RS16515	ACICU_RS16520	ACICU_RS16530	ACICU_RS16545	ACICU_RS16550	ACICU_RS16555	ACICU_RS16560	ACICU_RS16565	ACICU_RS16570	ACICU_RS16575	ACICU_RS16580	ACICU_RS16585	ACICU_RS16590	ACICU_RS16595	ACICU_RS16600	ACICU_RS16615	ACICU_RS16620	ACICU_RS16635	ACICU_RS16640	ACICU_RS16645	ACICU_RS16655	ACICU_RS16665	ACICU_RS16670	ACICU_RS16675	ACICU_RS16680	ACICU_RS16690	ACICU_RS16700	ACICU_RS16705	ACICU_RS16710	ACICU_RS16715	ACICU_RS16720	ACICU_RS16725	ACICU_RS16730	ACICU_RS16735	ACICU_RS16745	ACICU_RS16750	ACICU_RS16755	ACICU_RS16760	ACICU_RS16765	ACICU_RS16770	ACICU_RS16775	ACICU_RS16780	ACICU_RS16785	ACICU_RS16790	ACICU_RS16795	ACICU_RS16800	ACICU_RS16805	ACICU_RS16810	ACICU_RS16815	ACICU_RS16820	ACICU_RS16825	ACICU_RS16830	ACICU_RS16840	ACICU_RS16845	ACICU_RS16850	ACICU_RS16855	ACICU_RS16860	ACICU_RS16865	ACICU_RS16870	ACICU_RS16875	ACICU_RS16880	ACICU_RS16885	ACICU_RS16890	ACICU_RS16895	ACICU_RS16900	ACICU_RS16925	ACICU_RS16930	ACICU_RS16940	ACICU_RS16945	ACICU_RS16950	ACICU_RS16955	ACICU_RS16960	ACICU_RS16970	ACICU_RS16975	ACICU_RS16980	ACICU_RS16985	ACICU_RS16990	ACICU_RS16995	ACICU_RS17000	ACICU_RS17005	ACICU_RS17010	ACICU_RS17015	ACICU_RS17020	ACICU_RS17025	ACICU_RS17030	ACICU_RS17035	ACICU_RS17040	ACICU_RS17045	ACICU_RS17060	ACICU_RS17080	ACICU_RS17085	ACICU_RS17090	ACICU_RS17115	ACICU_RS17125	ACICU_RS17130	ACICU_RS17135	ACICU_RS17140	ACICU_RS17145	ACICU_RS17150	ACICU_RS17155	ACICU_RS17160	ACICU_RS17190	ACICU_RS17200	ACICU_RS17205	ACICU_RS17210	ACICU_RS17220	ACICU_RS17225	ACICU_RS17230	ACICU_RS17235	ACICU_RS17240	ACICU_RS17245	ACICU_RS17250	ACICU_RS17255	ACICU_RS17260	ACICU_RS17265	ACICU_RS17270	ACICU_RS17275	ACICU_RS17345	ACICU_RS17350	ACICU_RS17365	ACICU_RS17370	ACICU_RS17375	ACICU_RS17380	ACICU_RS17390	ACICU_RS17395	ACICU_RS17400	ACICU_RS17405	ACICU_RS17410	ACICU_RS17415	ACICU_RS17420	ACICU_RS17425	ACICU_RS17430	ACICU_RS17435	ACICU_RS17450	ACICU_RS17455	ACICU_RS17460	ACICU_RS17465	ACICU_RS17470	ACICU_RS17475	ACICU_RS17480	ACICU_RS17485	ACICU_RS17490	ACICU_RS17495	ACICU_RS17500	ACICU_RS17510	ACICU_RS17515	ACICU_RS17520	ACICU_RS17530	ACICU_RS17535	ACICU_RS17540	ACICU_RS17545	ACICU_RS17550	ACICU_RS17565	ACICU_RS17570	ACICU_RS17575	ACICU_RS17585	ACICU_RS17590	ACICU_RS17595	ACICU_RS17600	ACICU_RS17605	ACICU_RS17610	ACICU_RS17615	ACICU_RS17620	ACICU_RS17625	ACICU_RS17630	ACICU_RS17635	ACICU_RS17645	ACICU_RS17650	ACICU_RS17655	ACICU_RS17660	ACICU_RS17665	ACICU_RS17675	ACICU_RS17680	ACICU_RS17685	ACICU_RS17690	ACICU_RS17695	ACICU_RS17700	ACICU_RS17705	ACICU_RS17710	ACICU_RS17715	ACICU_RS17720	ACICU_RS17725	ACICU_RS17730	ACICU_RS17735	ACICU_RS17740	ACICU_RS17745	ACICU_RS17755	ACICU_RS17760	ACICU_RS17765	ACICU_RS17770	ACICU_RS17775	ACICU_RS17780	ACICU_RS17785	ACICU_RS17790	ACICU_RS17795	ACICU_RS17800	ACICU_RS17805	ACICU_RS17810	ACICU_RS17815	ACICU_RS17820	ACICU_RS17825	ACICU_RS17855	ACICU_RS17860	ACICU_RS17865	ACICU_RS17870	ACICU_RS17875	ACICU_RS17880	ACICU_RS17900	ACICU_RS17905	ACICU_RS17910	ACICU_RS17925	ACICU_RS17930	ACICU_RS17935	ACICU_RS17955	ACICU_RS17960	ACICU_RS17965	ACICU_RS17970	ACICU_RS17975	ACICU_RS17980	ACICU_RS17985	ACICU_RS17990	ACICU_RS18000	ACICU_RS18005	ACICU_RS18010	ACICU_RS18020	ACICU_RS18025	ACICU_RS18030	ACICU_RS18035	ACICU_RS18040	ACICU_RS18055	ACICU_RS18060	ACICU_RS18065	ACICU_RS18070	ACICU_RS18075	ACICU_RS18080	ACICU_RS18090	ACICU_RS18095	ACICU_RS18100	ACICU_RS18105	ACICU_RS18110	ACICU_RS18115	ACICU_RS18120	ACICU_RS18125	ACICU_RS18130	ACICU_RS18135	ACICU_RS18140	ACICU_RS18145	ACICU_RS18150	ACICU_RS18155	ACICU_RS18160	ACICU_RS18165	ACICU_RS18170	ACICU_RS18175	ACICU_RS18180	ACICU_RS18185	ACICU_RS18190	ACICU_RS18195	ACICU_RS18200	ACICU_RS18205	ACICU_RS18220	ACICU_RS18225	ACICU_RS18230	ACICU_RS18235	ACICU_RS18240	ACICU_RS18245	ACICU_RS18250	ACICU_RS18255	ACICU_RS18260	ACICU_RS18265	ACICU_RS18270	ACICU_RS18275	ACICU_RS18280	ACICU_RS18285	ACICU_RS18290	ACICU_RS18295	ACICU_RS18300	ACICU_RS18305	ACICU_RS18310	ACICU_RS18315	ACICU_RS18320	ACICU_RS18355	ACICU_RS18360	ACICU_RS18365	ACICU_RS18370	ACICU_RS18375	ACICU_RS18380	ACICU_RS18385	ACICU_RS18390	ACICU_RS18395	ST	clonal_complex
GCA_000015425.1_ASM1542v1_genomic.fna	27	80	53	41	50	1	7	1	N	58	9	41	10	33	N	53	51	39	32	113	1	8	56	56	3	N	62	22	13	43	2	11	13	12	30	N	69	N	2	4	2	44	51	66	65	59	67	14	2	5	84	N	46	23	13	64	N	61	10	37	43	193	63	61	68	96	63	99	80	71	65	N	85	52	52	25	2	81	54	44	58	97	13	54	81	77	N	65	63	53	45	41	35	37	34	4	39	56	35	41	21	48	21	33	46	234	57	54	87	4	48	37	3	5	1	1	1	40	2	6	23	47	39	48	26	36	N	34	56	55	5	13	60	N	37	51	5	41	10	46	74	24	15	33	26	52	37	56	38	57	55	N	N	31	10	34	3	3	N	18	55	51	44	3	39	45	54	79	52	41	199	36	45	54	38	44	1	69	4	54	57	270-	2	39	6	48	48	55	46	30	N	44	43	39	N	48	1	2	35	43	65	36	36	53	6	12	1	21	1	1	N	73	25	N	27	37	49	N	45	30	16	16	13	64	N	16	56	44	12	N	33	16	59	48	34	1	44	49	5	43	48	11	41	45	47	8	44	N	8	9	26	50	61	15	68	46	55	62	67	1	46	37	49	10	N	N	61	73	1	55	38	40	37	44	103	66	59	45	3	32	N	3	6	N	27	13	45	36	1	62	9	41	34	4	53	63	51	51	6	48	49	68	66	N	36	57	40	38	20	54	54	65	1	82	46	1	63	12	57	1	41	45	43	44	49	41	48	50	60	49	46	58	5	48	11	1	78	46	38	70	1	22	1	3	60	1	1	40	36	37	2	4	39	80	43	3	2	46	57	52	26	1	25	159-	14	1	56	86	59	13	49	43	N	61	64	39	59	44	N	30	N	55	52	47	47	55	N	36	N	30	44	26	44	50	7	53	43	2	3	47	2	7	42	57	60	N	46	30	N	50	86	1	44	56	N	60	N	67	53	48	33	42	44	3	65	58	16	46	47	49	64	49	26	N	53	40	34	11	2	N	2	33	1	29	68	56	1	35	34	53	1	1	N	9	58	1	N	14	47	45	14	54	45	55	2	2	1	41	3	37	44	46	4	1	49	10	19	66	47	34	18	37	5	43	N	27	51	10	47	42	9	42	47	45	48	49	46	60	91	60	72	54	48	56	51	54	60	51	55	1	89	3	1	65	1	N	1	3	57	30	196	58	34	2	4	3	76	39	56	36	33	37	4	1	71	1	44	39	38	N	55	3	33	36	30	51	28	37	55	46	38	N	42	63	36	62	46	58	3	N	50	65	55	60	47	38	42	2	32	49	34	1	1	36	32	1	2	79	51	43	N	37	6	N	9	27	42	7	52	47	N	42	50	41	75	24	15	76	47	52	50	N	37	N	42	47	1	N	49	1	1	1	47	36	16	32	48	63	47	12	11	2	31	43	45	2	72	19	51	45	42	41	53	9	5	5	47	43	44	71	56	49	15	N	55	53	46	49	62	54	66	84	57	65	35	N	119	76	50	23	56	16-	19	68	N	44	31	2	53	55	34	5	62	50	6	48	43	22	N	9	54	48	N	N	39	50	13	60	61	62	50	N	34	56	54	95	57	48	N	18	43	55	40	38	N	22	7	33	223	47	36	54	2	3	26	48	19	16	1	N	79	47	N	43	N	2	19	25	30	135	N	29	45	61	34	46	27	47	43	58	44	57	41	N	5	5	8	21	53	52	2	32	38	39	42	4	46	19	37	43	27	44	45	69	60	44	N	49	43	N	37	43	20	N	67	37	1	40	1	47	61	34	N	43	1	1	54	27	48	73	31	29	250	46	N	55	39	N	23	N	6	20	2	35	3	1	N	44	55	54	60	54	55	9	69	35	42	34	22	39	22	58	1	39	7	6	54	37	N	39	65	6	44	1	42	32	10	39	83	54	6	41	N	44	1	21	N	46	50	49	45	53	39	48	4	42	52	54	57	54	60	59	44	51	47	47	47	48	41	57	54	48	0?	0?	0?	0?	0?	0?	0?	0?	0?	0?	0?	0?	0?	0?	0?	0?	0?	N	N	47	51	62	49	57	53	43	69	48	1	33	22	21	53	58	46	42	1	40	49	41	60	93	51	24	50	46	17	N	49	N	46	44	50	51	N	48	54	45	42	87	53	30	46	57	52	N	101	4	57	N	20	35	1	51	11	2	26	78	12	39	70	42	N	47	12	10	N	8	43	96	48	35	32	44	38	43	53	66	41	53	47	35	10	31	39	40	47	5	39	36	46	N	21	27	50	39	41	3	44	32	N	1	65	44	62	12	32	N	54	37	17	5	64	N	35	33	28	1	43	33	64	9	N	44	1	44	24	52	27	52	2	43	44	N	45	1	3	52	N	44	12	1	42	38	1	14	58	43	35	42	8	48	32	35	51	13	18	56	26	34	72	1	6	32	42	N	64	13	28	50	50	53	39	22	42	43	1	33	29	43	42	N	77	4	26	55	3	9	6	N	1	1	1	1	56	52	74	63	52	51	11	21	56	53	N	56	45	52	4	51	16	34	60	46	59	60	51	51	53	64	39	N	45	4	2+	43	13	6	11	50	79	3	22	39	51	20	33	18	2	32	61	53	40	53	47	N	46	55	54	N	48	56	N	57	44	63	29	52	48	54	3	48	59	56	27	97	50	43	52	48	200	2	N	48	59	57	46	45	73	76	46	61	57	58	7	49	54	0?	0?	0?	0?	0?	0?	0?	0?	0?	0?	0?	0?	0?	0?	0?	0?	68-	0?	0?	0?	0?	80	44	66	79	65	50	N	65	51	65	1	49	N	116	47	48	53	277	49	56	56	52	N	N	42	7	67	0?	147-	56	0?	49	51	233	52	58	51	41	41	4	62	49	57	45	39	30	N	44	50	49	31	45	2	45	1	48	57	44	63	41	55	29	61	3	42	45	40	36	49	58	48	63	52	19	42	2	57	52	3	2	2	13	45	12	15	1	11	44	93	1	33	45	41	43	28	6	35	44	68	30	3	56	6	50	41	54	N	53	33	37	29	6	25	42	41	32	47	29	8	41	27	17	18	13	7	35	44	66	24	19	16	41	25	25	1	43	46	1	39	5	10	7	93	51	45	67	52	77	N	72	1	3	163	49	31	11	26	10	48	44	36	43	N	50	N	9	27	61	67	1	57	67	41	53	45	52	217	24	47	2	54	45	26	N	3	2	55	N	57	27	22	21	1	47	34	41	46	11	11	127	26	44	61	31	56	85	N	186	30	65	60	N	39	51	2	42	39	37	N	57	2	45	9	46	42	49	14	N	24	74	34	42	55	48	82	0?	92	N	6	N	47	40	52	53	49	28-	46	43	46	3	40	48	40	39	60	61	64	63	1	24	55	27	3	9	1	1	N	49	36	52	43	95	43	81	8	47	11	1	N	16	N	39	10	50	2	39	N	77	50	62	56	47	38	N	24	N	31	53	6	61	57	N	45	46	50	N	56	1	1	55	48	18	44	37	53	32	69	33	30	40	2	1	40	10	1	50	36	22	74	44	48	59	46	1	6	53	5	57	1	189	23	28	55	15	2	124	47	165-	13	43	44	58	36	73	65	86	58	49	44	40	47	37	67	58	2	38	30	25	2	12	8	N	2	107	54	47	48	N	14	38	51	42	58	57	56	46	N	50	22	18	36	N	27	58	N	56	21	57	N	51	9	52	23	48	68	58	36	49	48	58	N	6	52	68	N	59	67	49	52	57	65	53	50	54	N	7	5	57	8	167	18	40	45	39	6	1	6	23	28	N	37	45	0?	51	46	60	53	44	N	77	40	88	53	55	35	47	51	40	88	37	75	5	5	40	45	11	46	54	43	53	23	6	54	10	132	54	57	68	34	55	40	22	N	48	39	73	48	47	55	50	42+	32	46	55	14	53	38	190	1	N	8	33	3	14	37	41	9	45	31	42	53	N	59	51	38	19	22	N	N	9	52	49	47	51	36	N	107	26	45	39	28	26	47	22	2	87-	73	58	42	65	4	22	14	31	30	1	47	41	24	14	31	24	1	35	38	37	N	49	12	63	47	N	59	50	54	68	N	35	57	82	N	10	67	46	50	12	48	54	64	53	16	13	54	91	61	47	55	84	35	32	55	2	50	59	47	45	76	56	50	29	4	55	N	62	0?	54	14	45	50	30	17	31	54	1	3	22	5	83	9+	N	29	29	54	51	9	8	96	41	45	N	31	38	5	42	1	2	43	17	46	24	1	52	4	26	21	28	20	4	20	49-	191	33	33	3	1	5	38	N	54	64	52	40	N	31	42	N	271	47	62	60	63	50	39	46	33	49	12	76	N	50	35	46	24	28	55	52	32	71	4	58	42	43	40	1	63	56	26	24	59	47	44	74	3	1	48	25	1	54	9	11	4	49	1	46	40	74	73	24	1	1	40	47	65	45	6	21	41	33	42	38	42	46	28	47	8	29	15	53	77	41	76	46	1	31	45	30	N	64	N	43	37	47	47	5	2	53	14	65	40	N	36	N	40	9	42	41	35	49	46	36	50	56	42	N	3	57	63	40	1	39	56	0?	48	66	37	22	70	88	43	44	41	48	1	73	N	61	41	52	45	7	4	57	1	30	N	23+	11	50	11	46	N	38	47	9	42	29	44	47	46	1	3	23	19	2	43	30	2	36	33	3	28	45	55	N	46	32	42	18	40	1	47	48	48	41	24	34	55	N	1	15	77	29	36	35	1	48	72	1	1	2	1	1	1	52	6	1	N	1	3	1	1	1	1	1	1	1	1	1	1	1	3	3	1	1	1	2	51	55	8	N	30	43	54	16	58	N	52	1	1	N	5	N	6	45	9	46	34	43	51	48	53	36	17	47	43	48	49	60	41	26	10	6	49	47	81	41	49	52	49	31	28	35	39	48	40	54	34	42	33	31	47	47	40	44	39	N	4	10	39	1	33	6	2	36	65	28	32	26	29	43	4	1	57	2	1	35	70	33	60	109	44	5	2	69	8	9	56	N	48	3	N	58	60	76	1	37	52	2	N	50	37	4	5	37	73	44	45	58	N	11	65	56	46	43	45	49	33	43	49	50	55	53	54	9	51	51	46	60	56	53	207	61	46	57	41	49	53	51	41	56	53	49	51	52	38	21	56	52	40	61	4	48	39	72	56	70	37	59	157	46	36	41	58	104	37	47	61	50	3	N	41	57	46	52	67	5	50	34	2	61	57	43	49	42	45	24	49	59	46	52	22	69	43	34	30	N	45	N	43	10	1	61	3	32	65	41	45	83	49	268	2	59	19	N	33	32	55	53	N	56	65	63	39	50	8	1	69	54	47	1	9	55	N	N	332-	N	28	67	76	66	44	N	61	51	59	66	36	46	45	40	55	73	47	4	4	2	9	51	55	42-	17	2	12	9	N	N	1	49	62	55	47	90	43	46	33	48	2	N	76	42	74	N	50	49	47	72	56	56	1	45	42	51	63	41	6	49	50	52	65	31	0	0
GCA_000069205.1_ASM6920v1_genomic.fna	23	299	185	38	155	18	37	5	185	221	1	160	1	90	229	204	214	47	128	324	54	16	215	187	0?	0?	0?	0?	0?	0?	0?	0?	0?	0?	114	4	276	154	188	36	7	19	183	257	223	230	232	55-	58	185	252	14	156	118	168	257	274	194	3	243	42	173	218	204	265	N	4	310	335	274	252	263	337	0?	174	16	128	326	243	143	222	274	33	0?	0?	229	247	215	257	217	186	137	7	108	100	4	146	198	125	16	59	162	13	7-	117	222	0?	0?	0?	123-	140	133	37	73	1	44	37	136	64	134	56	59-	99	154	197	122	145	112	10-	180	53	91	214	9-	162-	170	1	0?	0?	0?	256	94	76	N	N	194	26	195	10	58	199	301	203	10	65	1	1	28	106	75	190	183	130	47	112	177	163	205	183	166	0?	99	154	190	154	155	36	249	11	192	204	168	46	140	124	179	N	192	151	76	183	36	146	120	159	178	45	53	121	123	211	6	114	0?	45	56	40	78	2	1	407	274	3	N	14	103	171	297	167	171	114	87-	N	3	211	153	198	157	17	38-	121	110	230	153	96	5	174	192	3	131	138	130	149	172	0?	122	173	282	4	87	50	123	216	66	243	197	223	0?	234	132	185	129	194	58	277	273	207	224	1	199	14	147-	117	139	269	225	184	120	6	69	206	117	7	197	14	188	175	16	1	199	9	21	103	76	192	206	179	178	79	189	156	222	249	140	9	0?	0?	0?	0?	0?	0?	229	48	213	164	1	214	48	179	23	142	140	169	189	183	137	156	167	209	62	150	211	6	164	25-	7	268	0?	116	241	41	63	56	56	213	1	1	128	109	0?	183	N	113	222	118	83	127	148	213	162	1	25	102	130	14	1	170	275	201	1	172	143	95	222	0?	0?	218	131	197	105	223	191	180	161	166	206	186	103	35	6	45	77	173	173	9	168	7	33	50	153	107	163	140	191	213	185	157	37	265	123	219	72	150	214	151	188	166	247	169	165	98	146	157	2	212	184	1	43	160	150	233	149	44	173	193	255-	128	154	9	89	62	111	21	2	225	189	1	116	96	318-	1	41	230-	23	200	2	173	42	170	130	90	210	141	186	23-	101	63	124	7	116	162	158	1	1	148	93	159	191	134	120	116	N	124	140	181	4	47-	3	0?	148	87	19	184	178	191	N	191	210	268	221	0?	0?	N	231	0?	220	230	175	198	1	305	1	130	248	60	0?	1	6	204	88	22	218	122	8	1	42	232	176	201	96	85	135	149	51	220	5	186	136	104	31	224	45-	183	90-	0?	0?	7	105	210	76-	N	208	145	175	118	238	3	205	82	186	187	187	205	193	140	122	141	10	104	139	111	59	8	129	98	22	80	175	112	137	0?	128	20	93	37	25	134	69	179	157	193	145	70	102	164	77	1	0?	0?	0?	0?	0?	155	198	104	166	4	148	174	37	1	204	82	104	127	110	138	240	0?	64	2	62	85	154	145	107	239	88	191	144	154	138	164	78	1	35	N	171	162	286	218	178	153	163	206	211	167	234-	N	187	0?	0?	0?	0?	0?	0?	0?	0?	0?	0?	0?	226	222	229	277	134	121	3	N	0?	0?	0?	0?	0?	0?	0?	0?	0?	0?	0?	0?	0?	0?	0?	0?	0?	0?	0?	0?	0?	0?	0?	0?	0?	0?	0?	202	0?	0?	68-	0?	212	2	102	193	121	138	157	212	141	120	159	1	N	11	176	96	190	73	101	0?	170	84	172	88-	2	138	68	77	108	131	146	127	201	102	160	4	7	138	202	181	158	110	246	99	9-	7	63	191	182	22	101	132	127	153	103	156	38	121	137	115	0?	160	242	0?	0?	288-	194	148	195	135	143	54	208	221	15	3	133	1	131	239	128	144	159	5	203	173	0?	169	249	59-	84	240	126	198	195	153	129	149	234	12	64	40	119	7	62	333	184	0?	0?	0?	0?	0?	79	271	9	44	94	22-	111	54	182	2	117	39	12-	0?	0?	0?	0?	0?	0?	0?	195	155	109	96	131	0?	0?	130	124	101	119	1	117	264	0?	0?	0?	0?	0?	0?	168	0?	134	184	0?	202	N	196	0?	245	0?	0?	0?	0?	0?	0?	0?	0?	0?	0?	0?	0?	0?	0?	0?	0?	0?	0?	0?	0?	0?	0?	0?	0?	0?	0?	0?	0?	0?	0?	0?	0?	0?	0?	0?	0?	0?	1-	0?	0?	0?	0?	0?	0?	0?	0?	0?	0?	0?	0?	0?	0?	0?	0?	0?	0?	0?	0?	0?	0?	0?	0?	0?	0?	0?	188	3	158	272	N	17	0?	0?	0?	0?	0?	11-	0?	0?	68-	0?	0?	0?	0?	0?	0?	241	127	133	264	168	0?	178	56	46	158	N	197	307	196	3	81	24	17	180	210	210	175	217	0?	121	0?	0?	0?	0?	0?	2	27	9	0?	0?	150	30	183	142	143	8-	0?	0?	0?	55	185	152	N	145	99	97	180	106	9	13	175	215	4	121	76	21	4	9-	288	5	186	142	48	28	21	49-	1	152	31	152	115	71	156	69	122	169	212	158	144	78	118	102	111	N	181	161	11	129	9	5	9	107	152	94	100	177	0?	83	218	24	7	104	0?	131	237	98	29	153	222	212	128	14	134	135	1	116	98	31-	196-	0?	283	54	28	204	59	8	19	139	2	112	1	1	219	149	213	202	203	176	7	N	229	0?	0?	0?	0?	0?	0?	0?	0?	86	238	3	N	229	N	168	43	0?	157	141	144	14	34	82	32	106-	0?	167	219	16	2	23	30-	59	76	3	4	122	212	213	151	171	0?	0?	0?	0?	0?	0?	174	212	187	251	179	245	193	191	196	0?	0?	0?	0?	0?	0?	0?	0?	0?	0?	0?	0?	1-	0?	0?	0?	0?	0?	0?	0?	0?	0?	0?	0?	0?	0?	0?	0?	288	19	222	161-	0?	0?	0?	0?	0?	138-	261	218	185	160	85	197	68-	0?	0?	0?	0?	0?	0?	0?	0?	0?	0?	0?	0?	208	0?	0?	0?	0?	0?	0?	167	0?	0?	0?	0?	0?	0?	0?	0?	0?	0?	0?	0?	0?	0?	0?	0?	0?	0?	0?	196	N	15	121	47	249	217	0?	146	160	93	207	166	198	122	118-	143	106	154	62	155	194	37	0?	114	169	49	217	112	168	89-	116	106	168	1	150	240	163	2	121	39	194	158	2	60	66	10-	154	49	2	1	67	111	238	1	3	143	117	166	0?	0?	0?	0?	0?	0?	68-	0?	0?	0?	0?	0?	0?	181	11	113	N	49	24	N	61	74	3	56	54	129	71	156	N	75	93	96	162	188	150	54	44	38	164	106	0?	0?	0?	36	33	62	14	5	254	40-	0?	0?	153	273	226	0?	0?	0?	0?	0?	88	1	203	5	0?	122	N	0?	0?	143	150	141	75	199	203	117	239	234	141	200	188	214	204	82	178	88	0?	142	0?	5	0?	68-	0?	0?	0?	0?	0?	0?	32	161	0?	99	150	0?	0?	343	69	174	189	7	203	247	176	177	216	236	220	227-	134	179	45	137	0?	129	219	175	52	135	39	0?	0?	0?	0?	220	42	239	14	141	212	175	298	159	279	298	122	170	162	138	207	196	159	N	173	156	164	10-	35-	0?	0?	0?	0?	0?	149	230	85	1	186	4	41	3	1	44	145	0?	0?	0?	0?	0?	147	242	24	160	128	1	186	179	140	118	133	16	31	116	199	230	0?	196	191	0?	0?	0?	0?	0?	0?	0?	0?	0?	0?	0?	0?	183	144	191	181	1	1	184	173	90	150	99	176	100	180	107	9	151	2	1	13	71	4	175	130	4	263	163	163	185	57-	6	123	201	99	191	1	0?	166	82	54	N	104	0?	249-	19	0?	0?	0?	181	0?	255	78	314	N	183	147	121	129	99	193	164	84	0?	0?	121	89-	119	83	1	127	0?	178	163	7	219	3	122	189	143	32	237	212	168	27	50	8	1	126	179	152	259	0?	185	151	211	275	222	64	0?	2	155	188	185	0?	0?	0?	0?	0?	0?	0?	0?	0?	0?	0?	0?	0?	0?	0?	0?	0?	0?	243	56	145	0?	22	158	62	65	148	149	91	78	183	112	2	163	110	168	83	166	150	202	176	151	209	0?	123	450-	192	175	122	155	174	130	277	101	205	194	99	112	130	60	17	181	129	191	111	N	0?	141	334	188	194	0?	68	0?	0?	0?	0?	0?	60	215	158	21	175	162	25	131	180	N	96	201	124	183	3	32	9-	94	135	20	123	145	2	173	80	123	182	52	180	195	97	140	151	121	160	N	154	157	155	162	128	150	239	45	54-	103	107	74	11-	62	5	201	296	59	109	168	2	112	27	169	94	1	132	122	93	18	13	146	1	91	N	2	168	159	102	164	149	182	177	152	162	176	23-	2	190	291	151	29	204	151	171	2	165	12	190	185	188	N	0?	0?	0?	148	168	0?	0?	0?	0?	0?	147	184	48	151	0?	181	160	69	1	0?	60	210	0?	179	13	140	119	88	69	137	237	71	33	98	158	273	56	0?	0?	0?	0?	0?	0?	0?	229	126	153	148	155	232	76	189	36	33	146	91	144	81	10	177	7	123	80	167	140	N	89	167	180	115	119	3	1	5	12	209	173	278	192	16	117	10-	2	148	263	0?	0?	0?	0?	195	41	160	95	161	110	236	168	0?	187	160	137	111	189	0?	160	232	2	197	24	138	151	35	211	210	164	142	191	168	145	N	3	159	186	221	72	0?	115	92	73	0?	10	142	216-	0?	238	2	2	41	N	165	251	200	27	5	134	123	137	116	156	N	112	174	10	79	15	210	212	156	214	N	1	5-	164	0?	10-	225	258	2	151	190	163	129	100	166	5	0?	N	150	121	189	138	9	13	154	124	185	15-	103	163	196	109	189	77	211	236	115	75	126	216	86	149	217	112	136	268	0?	170	0?	0?	160	1	246	164	194	N	N	146	7	45	212	1	N	N	16	77	0?	N	160	184	109	176	66	84	13	142	9	163	9	3	2	59	100	135	92	94	125	85	11	131	130	195	189	148	98	216-	117	125	5	127	150	N	62	81	0?	217	233	46	N	236	80	195	N	4	176	216	1	12	2	2	1	1	155	6	1	48	33	41	16	22	49	1	16	1	1	37	54	29	1	73	22	55	54	17	117	183	0?	108	67	132	155	0?	103	236	136	211	5	92	128	2	1	97	52	151	176	85	144	161	0?	214	140	51	0?	189	212	12	244	166	88	98	6	44	194	230	152	189	199	163	113	93	2	69	165	138	191	0?	0?	0?	13-	187	170	131	158	103	150	166	N	N	1	104	1	1	0?	0?	0?	0?	0?	0?	137	7	1	221	66	15	101	231	102	210	343	151	193	1	153	111	108	166	257	146	23-	149	189	207	279	1	122	220-	34	198	183	159	1	167	137	226	173	144	310-	260	32	197	217	106	0?	172	0?	146	145	200	189	0?	0?	207	104	179	205	227-	243	242	220	198	236	207	223	34	181	215	0?	0?	0?	231	217	228	222	122	128	226	200	171	164	126	213	161	267	222	224	162-	224	415	162	N	149	63-	313	21	164	214	184	2	176	6	238	144	177	211	80	163	124	14	0?	240	41	160	171	161	144	164	197	165	181	13	0?	158	4	91	81	6	226	132	62	31	195	117	81	238	18-	198	241	149	253	18	204	110	189	111	116	186	N	140	206	N	179	170	184	88	25	207	183	171	5	47	166	168	202	157	236	214	227	380	229	155	216	0?	161	207	217	30	143	174	142	0?	149	113	6	21	5	1	170	210	176	112-	16	36	69	201	142	1	22	201	0?	24	183	134	149	103	167	55	0?	207	127	270	174	N	277-	159	249	187	195	1	3	101	187	205	87-	66	170	163	173	234	113	0	0
GCA_000184475.2_ASM18447v2_genomic.fna	2	18	11	11	11	1	1	1	12	12	1	11	2	10	12	11	12	12	11	12	10	8	12+	12	6	19	19	10	16	17	2	13	16	14	6	8	19	17	19	16	14	17	20	20	19	19	22	9	5	5	12	12	11	5	11	12	12	12	6	20	6	22	20	18	4	21	20	4	19	11	19	19	19	16	17	16	16	19	13	13	18	18	8	14	19	13	14	14	15	14	18	16	13	8	13	12	15	18	5-	13	15	14	12	11	13	17	16	N	17	15	16	13	3	5	1	1	1	1	1	1	1	1	1	1	1	1	1	1	1	1	1	1	1	10	15	1	1	1	1	1	1	1	1	1	1	1	2	1	1	1	1	21	1	1	1	1	1	1	1	1	13	1	1	1	1	6	6	5	5	5	6	4	1	1	1	1	1	98+	1	1	1	1	1	1	1	1	1	1	1	1	1	1	1	1	1	6	1	1	1	1	1	1	1	1	1	1	1	1	1	1	1	1	1	1	1	1	1	20	1	1	1	1	1	1	1	1	1	1	6	1	1	1	1	1	1	1	1	1	1	1	1	1	1	1	1	1	1	N	1	1	1	1	1	1	1	1	1	1	1	1	1	1	1	1	N	1	1	1	1	1	1	1	1	1	1	6	1	1	1	1	1	1	1	1	1	1	1	1	1	1	1	1	1	1	1	1	1	15	1	1	1	1	1	1	1	1	1	1	1	1	1	1	1	1	1	1	1	1	1	1	1	1	1	1	1	1	1	1	1	1	13	1	N	1	1	1	1	1	1	1	1	1	1	1	1	1	1	1	1	1	1	1	1	1	1	1	1	1	1	1	1	1	1	10	1	1	1	1	1	1	1	1	1	1	1	1	1	1	1	1	1	1	1	1	1	1	1	1	1	1	1	1	1	1	1	6	1	1	1	1	1	1	1	17	1	1	1	1	1	1	1	1	1	1	1	1	1	6	13	1	1	1-	1	1	1	1	1	1	1	1	1	1	1	1	1	1	1	1	1	1	1	1	1	1	1	1	1	1	1	1	1	1	1	1	1	1	1	1	1	1	1	1	1	1	1	N	1	1	1	1	1	1	1	1	1	1	1	1	1	1	1	1	1	N	1	1	1	1	N	1	1	15	1	1	1	1	1	1	1	1	1	1	1	1	1	1	1	1	15	1	1	1	1	1	1	1	1	1	1	1	1	1	1	1	1	1	1	1	1	1	1	1	1	1	1	1	1	1	1	3	1	1	1	1	1	1	1	1	1	1	N	N	1	1	1	1	1	1	1	1	1	1	1	1	1	1	1	1	1	1	1	1	1	1	1	1	1	1	1	6	1	1	1	1	1	1	1	1	6	1	1	1	6	1	1	1	1	1	1	1	16	1	1	1	1	1	1	1	1	1	N	N	1	1	1	1	1	1	1	1	1	1	1	1	1	1	1	1	1	1	1	1	1	1	1	1	1	1	1	1	1	1	1	1	1	1	6	1	1	1	16	25	15	16	1	16	20	17	15	17	15	15	16	16	18	15	14	1	15	16	2	10	1	1	1	1	1	1	1	1	1	1	1	1	1	1	1	1	1	1	1	N	1	1	1	1	17	N	6	1	1	1	1	1	1	1	1	1	1	66	1	1	1	1	1	1	1	1	1	1	1	1	1	1	1	1	1	1	1	1	1	1	1	1	1	1	1	1	1	1	1	1	1	1	1	1	1	1	1	6	1	1	1	1	1	1	1	1	1	1	1	1	1	15	1	1	1	1	1	1	1	1	1	16	1	1	1	1	1	1	1	1	N	1	1	1	1	1	1	1	1	1	6	1	1	1	1	1	1	1	1	1	1	1	1	1	1	1	1	1	1	1	1	1	6	1	1	1	13+	1	1	1	1	N	1	1	1	1	1	1	1	1	1	1	1	1	1	1	1	1	1	1	1	1	1	1	1	1	1	1	1	1	1	1	1	1	N	1	1	1	1	1	1	1	1	1	1	1	1	1	1	6	1	1	1	1	1	1	1	1	1	1	6	1	1	1	1	1	1	1	1	1	1	1	1	1	1	15	1	1	1	1	1	1	1	1	1	1	1	1	1	1	1	1	1	1	1	1	427-	1	1	1	1	1	1	1	1	1	1	1	1	1	1	1	1	1	1	N	1	1	1	1	1	1	1	1	1	1	1	1	1	1	1	N	1	1	1	1	1	1	1	6	1	1	1	1	1	1	1	1	1	1	1	1	1	1	1	1	1	1	13	N	1	1-	1	1	1	1	14	1	1	1	1	1	1	1	1	1	1	1	13	1	1	1	1	1	1	1	1	1	1	1	1	1	1	1	1	1	1	1	1	1	1	1	1	1	1	1	1	N	1	1	1	1	1	1	1	1	1	1	1	1	1	1	1	1	6	1	1	1	1	1	1	1	1	14	1	1	1	1	1	1	N	1	1	1	1	1	1	1	1	N	N	10	1	1	1	1	1	1	1	1	1	1	1	1	1	1	1	1	1	1	8	1	1	1	1	1	1	1	1	1	1	1	1	1	6	1	1	1	1	1	1	1	1	1	1	1	1	1	1	1	1	1	N	1	16	1	1	1	1	1	1	1	1	1	1	1-	1	1	1	1	1	1	1	1	1	1	1	1	1	1	1	1	1	1	1	1	1	1	1	1	1	1	1	1	438+	6	1	1	1	1	1	1	1	37	1	1	N	1	1	1	1	1	1	1	1	1	1	1	1	1	1	1	16	1	1	1	1	14	N	1	1	1	1	1	1	N	1	1	1	1	1	1	1	N	1	1	1	1	1	6	1	1	1	1	1	1	1	1	1	1	1	1	1	1	1	1	1	1	1	1	1	1	1	1	1	1	1	1	1	1	1	1	1	1	1	1	16	1	1	1	1	N	6	1	1	1	1	1	1	16	1	1	N	1	1	1	1	1	1	1	1	1	1	1	1	1	1	1	1	1	1	1	1	1	1	1	1	1	1	1	1	1	1	1	1	16	1	1	1	1	1	1	1	1	1	1	1	1	1	1	1	1	1	1	1	1	1	1	1	1	1	1	1	1	1	1	1	1	1	1	6	1	1	44	1	1	1	1	1	1	1	1	1	1	1	1	67	1	14	1	6	1	1	1	1	1	1	1	1	6	1	1	1	1	1	1	1	1	1	1	1	1	1	1	1	1	1	1	1	1	1	1	1	1	1	1	1	1	1	1	1	1	N	1	1	1	1	1	6	1	1-	1	1	1	1	1	1	1	1	1	1	N	1	1	1	83	1	1	1	1	N	1	1	1	15	1	1	1	1	1	6	1	1	1	1	1	1	1	1	1	1	N	1	1	1	6	1	1	1	1	1	1	1	1	1	1	1	1	1	N	1	1	1	1	1	1	1	1	1	1	1	1	1	1	1	1	1	1	1	1	1+	1	1	1	1	1	1	1	1	6	1	1	1	1	1	1	1	1	1	1	1	1	1	1	1	1	1	1	1	1	1	1	1	1	1	1	1	1	1	47	1	1	1	1	1	1	1	1	1	1	1	1	1	1	1	1	1	6	1	1	1	1	1	1	1	1	15	1	N	1	1	1	1	1	1	1	1	1	1	1	1	N	1	1	1	6	5	5	5	6	N	5	5	5-	5	6	5	4	5	5	1	6	6	1	1	6	6	5	5	5	1	1	1	1	1	1	1	1	1	1	1	1	1	1	1	1	1	1	1	1	1	15	19	1	1	1	1	1	1	1	14	1	1	1	1	1	1	1	1	1	1	1+	1	1	1	6	1	1	1	1	1	1	1	1	1	1	1	1	1	1	1	1	1	1	1	1	N	1	1	1	1	1	1	1	1	N	1	15	1	1	1	1	1	1	1	1	1	1	1	1	1	1	1	1	1	1	1	1	1	1	1	1	1	1	1	1	1	1	1	1	1	1	6	1	1	1	1	1	1	1	1	1	1	1	1	1	1	1	1	1	1	1	1	1	1	1	1	1	1	6	1	17	1	1	1	N	1	1	1	1	1	1	1	1	1	1	1	1	1	1	1	1	1	1	1	1	6	1	1	1	1	1	1	1	1	1	N	1	1	1	1	16	6	1	1	1	1	1	1	1	1	1	1	1	1	N	1	1	1	1	1	1	1	1	1	1	1	1	1	1	19	1	1	1	1	6	1	1	1	1	N	1	1	1	1	1	1	1	1	1	1	1	3	1	11	1	1	1	1	1	1	1	1	1	1	1	1	1	1	1	1	1	1	1	1	1	1	1	1	1	1	1	1	1	6	1	N	1	1	1	1	1	1	1	1	1	1	1	1	1	1	14	17	15	14	15	4	17	1	1	1	1	1	1	N	1	1	1	N	1	1	1	1	14	1	N	1	1	N	1	1	1	1	1	1	1	1	1	1	1	1	1	1	1	1	1	1	1	1	16	11	13	10	9	13	15	16	12	16	1	1	N	1	1	1	1	6	1	1	1	1	1	1	1	1	1	1	N	1	1	1	1	1	1	1	1	14	14	N	15	13	15	14	17	15+	13	12	14	15	0?	15	16	12	13	18	17	14	15	14	14	1	15	1	1	1	1	1	1	1	1	1	1	1	1	1	1-	1	N	1	1	1	N	1	1	1	1	1	1	1	1	1	1	1	1	1	1	1	1	1	1	1	1	1	1	N	1	N	1	1	1	1-	1	1	1	1	1	1	1	1	1	1	1	1	1	1	1	1	3	1	1	1	1	1	1	1	1	3	1	1	1	1	1	1	1	1	1	1	1	1	1	1	1	1	1	1	1	N	1	1	1	1	1	1	14	1	1	1	1	1	1	1	1	1	1	1	1	1	1	14	14	5	14	16-	14	13	15	15	11	14	14	16	14	18	14	16	15	13	2	3	10	14	10	10	16	15	15	15	15	15	12	13	14	6	13	14	15	18	1	13	4	1	8	12	10	10	12	11	9	4	1	14	7	1	9	14	11	14	20	6	6	3	6	6	6	6	6	6	6	6	6	6	14	N	5	6	1	78	6	6	5	6	6	6	6	6	6	6	6	6	6	6	6	6	6	6	6	6	6	6	6	6	6	6	6	6	566-	6	16	6	17	N	6	6	6	6-	16	3	3	3	3	3	3	3	3	3	3	6	16	3	15	3	3	16	N	6	12	N	6	4	6	6	6	6	6	6	6	5	5	6	6	6	13	6	6	6	5	1	6	6	6	6	3	5	6	6	6	6	15	9	N	12	11	11	10	12	13	17	10	1	12	10	11	13	1	11	1	11	12	2	12-	12	17	12	5	12	13	12	12	12	12	11	11	7	1	12	12	11	1	3	11	12	12	11	12	81	12	12	11	10	16	12	12	12	20	11	10	12	12	11	12	11	10	7	8	10	12	11	12	10	2	11	7	12	9	1	13	12	12	12	12	11	11	11	11	N	N	12	11	12	12	11	11	11	11	10	16	3	10	10	12	12	12	6	12	12	12	12	11	0	0
GCA_000184495.2_ASM18449v2_genomic.fna	3	3	3	3	3	1	1	1	3	3	1	3	3	3	3	3	3	3	3	34	3	2	3	3	2	3	3	3	1	3	2	3	3	3	3	3	3	3	3	3	3	3	3	3	3	3	3	3	2	3	3	3	2	3	3	3	3	3	2	3	3	N	N	3	3	3	3	19	23	3	3	3	3	3	3	3	3	3	3	3	3	3	3	3	3	3	N	3	3	3	3	3	3	3	3	3	3	3	3	3	3	3	3	3	3	3	3	3	2	3	3	3	1	2	1	1	2	3	2	16	2	3	3	3	3	3	3	3	3	3	3	3	3	N	3	3	3	3	3	3	3	3	3	3	3	3	3	3	2	3	3	25	3	3	3	3	3	3	3	3	3	3	3	3	3	3	3	28	3	3	3	3	3	3	3	3	1	3	3	3	3	3	1	3	3	3	3	3	3	3	3	3	3	3	3	3	3	2	2	3	2	3	3	3	1	2	1	1	3	1	3	3	1	3	3	3	3	3	3	3	3	3	N	3	3	2	3	3	3	3	3	3	3	3	3	3	3	3	3	3	3	3	3	3	3	3	3	33	4	3	3	3	18	3	3	3	3	3	22	3	3	3	3	3	3	3	3	3	1	3	3	3	3	3	3	3	3	3	3	3	3	3	3	3	3	3	3	3	2	3	3	3	3	3	3	3	3	3	1	34	3	3	3	3	3	16	3	3	3	3	3	3	1	3	3	3	3	3	3	2	3	3	3	3	3	3	3	15	3	3	3	3	3	3	3	1	16	3	3	20	3	3	3	3	3	1	1	3	3	3	3	1	3	3	3	3	3	3	3	16	3	1	3	3	3	3	3	68	17	19	3	3	3	3	3	3	3	3	3	1	3	3	3	3	3	3	3	3	3	2	3	2	3	3	3	3	3	2	3	3	N	3	3	3	3	3	3	3	3	3	3	3	3	3	3	17	3	3	3	3	3	3	3	3	3	3	1	3	1	3	3	3	3	3	3	3	3	3	3	3	3	1	1	3	3	3	1	3	3	3	1	1	3	3	3	3	3	3	3	3	3	3	3	391-	3-	3	3	3	3	3	3	3	2	1	3	3	3	3	3	3	3	3	3	3	3	3	3	3	3	3	3	3	3	N	3	3	3	3	2	3	3	3	3	3	3	3	3	3	3	1	3	1	3	3	3	N	1	1	3	3	3	3	3	2	2	2	3	3	3	3	3	3	3	3	24	1	3	3	3	3	3	3	3	3	3	3	3	17	0?	18	3	3	3	3	3	3	3	3	3	3	3	3	3	3	3	3	3	3	1	3	3	1	1	3	3	1	1	20	3	3	46	3	1	3	1	3	3	2	3	3	3	3	3	3	4	3	3	3	3	3	3	3	3	3	3	3	3	3	3	1	N	3	3	3	3	3	3	3	N	1	2	2	3	3	3	3	N	1	3	3	3	3	3	3	1	3	3	3	3	3	3	3	3	3	3	3	3	3	3	3	3	16	3	3	2	3	156	3	3	3	3	3	3	3	3	3	3	2	3	3	3	3	3	3	1	3	3	3	3	3	3	3	3	3	3	3	3	2	3	3	3	3	3	19	3	N	3	3	3	3	3	3	3	3	3	3	3	3	3	3	3	3	1	3	3	3	3	3	3	3	3	3	3	3	3	2	3	1	3	3	3	3	3	3	3	3	3	3	3	3	3	3	3	3	3	3	3	3	3	3	2	3	3	3	3	3	3	3	3	3	3	3	3	3	3	3	3	3	3	3	3	3	3	23	3	3	3	3	1	3	3	2	3	3	3	15	3	3	3	3	3	3	3	2	2	3	3	3	3	3	3	3	2	3	3	3	25	3	16	17	18	17	17	13	20	15	16	13	1	12	14	19	2	14	10	13	20	16	4	12	20	6	3	3	3	3	3	3	3	3	3	3	3	21	2	2	16	3	3	3	N	0?	N	N	N	3	3	3	3	3	3	3	3	3	3	3	3	N	3	3	3	3	21	3	3	3	3	3	3	3	3	3	3	15	3	3	N	3	20	3	17	3	3	3	3	3	3	3	3	3	1	1	3	3	3	3	3	3	3	3	3	2	3	24	3	1	3	3	3	3	3	3	3	3	2	N	3	3	3	3	3	3	3	3	3	3	3	3	3	3	3	3	3	3	3	3	3	3	3	21	3	3	3	3	3	3	3	3	22	3	3	3	3	3	3	3	3	3	3	16	3	3	3	3	3	3	3	3	0?	3	3	3	3	3	1	3	3	3	3	3	3	3-	3	3	3	3	3	3	2	3	3	3	3	3	16	3	3	3	3	1	59	3	3	3	3	3	3	3	3	3	2	3	2	3	3	3	3	1	3	N	3	3	3	3	3	3	3	3	3	3	3	3	3	3	3	3	N	3	3	18	3	3	3	3	3	3	3	3	3	3	3	3	3	3	3	1	3	3	1	3	3	3	3	3	3	3	3	3	3	2	3	3	3	1	3	2	3-	1	18	3	3	3	3	3	3	3	3	3	3	N	1	3	3	3	3	3	3	3	3	3	3	3	3	3	3	3	3	3	2	3	3	3	24	3	3	3	3	3	3	1	3	3	3	3	3	3	3	N	3	3	3	3	3	3	3	3	3	3	3	3	3	3	3	3	3	3	1	2	3	207-	0?	0?	3	2	2	3	3	3	3	3	3	3	3	3	3	3	3	3	3	32	3	3	1	3	3	3	3	3	3	3	N	3	3	3	3	1	3	3	3	3	3	N	25	22	3	3	3	3	3	50	3	3	15	3	3	3	3	3	3	3	3	3	3	3	3	3	3	3	3	3	3	3	3	3	3	3	3	3	3	3	3	3	3	3	3	3	3	3	3	3	3	3	3	3	1	3	3	3	3	3	3	2	3	3	3	3	3	3	3	3	3	3	3	3	3	2	3	3	3	1	3	3	3	2	3	1	2	3	3	1	3	3	3-	N	3	2	N	3	3	3	3	3	3	3	3	3	3	3	3	3	3	2	3	3	3	3	3	3	3	3	2	3	3	1	2	3	3	3	3	3	3	3	N	3	1	3	3	3	3	3	3	3	18	3	3	3	3	3	3	3	2	3	3	N	3	1	3	3	3	3	3	3	3	3	3	3	3	3	3	3	3	3	3	3	3	3	3	2	3	3	3	3	3	3	3	2	17	3	3	3	3	3	1	3	3	3	3	3	16	30	3	3	3	3	3	3	3	3	3	3	3	3	185+	3	3	3	3	1	3	3	2	2	2	3	3	3	2	3	3	3	3	1	3	3	18	3	3	3	3	3	3	3	3	3	3	2	3	3	3	3	3	3	3	3	3	3	3	3	3	3	3	3	2	2	1	2	3	3	3	3	3	3	3	3	3	3	3	1	3	3	3	3	3	3	1	3	3-	3	3	3	3	3	3	3	3	3	3	3	2	3	2	3	3	3	3	3	17	1	1	3	3	3	3	3	3	3	25	3	3	3	2	1	3	3	2	3	3	3	3	3	3	3	3	2	3	3	3	3	1	3	3	3	3	3	2	3	3	3	3	3	3	17	3	3	3	3	3	3	3	3	3	3	52	1	3	N	3	3	3	3	1	1	3	9	3	3	3	3	3	3	3	3	3	3	3	3	3-	3	3	3	3	3	3	3	3	3	3	3	3	3	3	N	3	3	3	3	N	3	3	3	3	3	3	3	3	3	3	3	3	3	3	3	3	3	3	3	3	3	1	3	1	3	3	3	3	3	3	3	3	3	3	3	3	3	2	3	3	3	3	3	3	3	3	16	3	3	3	3	26	3	18	3	3	N	3	3	3	3	3	3	3	3	3	3	107	18	3	49	3	3	3	3	3	3	3	17	15	3	3	3	3	3	3	3	3	3	3	3	1	3	3	3	3	3	3	15	1	3	3	3	3	N	3	3	3	3	3	3	3	3	3	3	3	3	3	3	3	14	3	3	3	3	3	3	3	3	3	3	3	2	1	3	3	3	3	2	3	3	3	3	1	3	2	3	3	3	3	3	3	3	3	3	3	3	2	3	3	3	3	3	3	2	3	3	3	2	3	3	N	3-	3	3	3	3	3	3	3	3-	N	3	3	2	3	3	3	3	3	3	3	3	1	3	3	3	0?	3	3	3	3	3	3	3	3	1	2	3	3	3	3	3	3	3	3	3	3	3	3	3	3	3	3	3	3	3	1	2	3	3	3	3	1	3	1	3	3	3	3	3	3	3	3	2	2	2	1	1	3	3	3	3	3	3	3	3	3	3	3	N	3	3	3	3	3	3	3	3	3	3	3	3	3	3	3	3	3	3	3	3	2	3	3	3	3	1	3	3	3	3	3	3	3	3	3	3	3	3	3	3	3	3	2	3	1	3	3	3	3	3	1	3	3	3	3	3	3	3	3	3	3	3	3	3	3	3	3	3	3	2	3	1	3	3	2	3	3	N	3	3	20	3	2	3	3	3	3	N	3	3	3	3	3	3	3	15	3	3	3	3	3	3	3	3	3	3	3	3	3	3	3	3	3	2	3	3	N	3	3	3	3	3	3	3	1	3	3	3	3	3	3	3	3	3	1	64-	3	2+	3	3	3	3	3	3	3	3	3	3	3	3	3	1	1	3	1	3	3	3	1	3	3	3	3	3	3	3	3	3	3	3	3	1	3	3	3	3	2	3	3	3	2	3	3	3	3	3	3	3	3	1	3	2	1	1	1	14	3	1	1	2	2	1	1	1	1	1	1	1	2	3	2	1	3	1	N	2	1	3	3	3	3	3	3	N	3	3	3	3	3	2	2	3	1	2	3	3	3	3	4	3	3	3	3	3	3	3	3	3	3	3	3	3	3	3	3	3	27	3	3	3	3	2	3	3	3	3	3	3	3	3	3	3	3	3	3	3	3	3	3	3	3	1	3	2	1	3	3	3	3	3	3	3	4	1	3	3	1	3-	3	3	3	18	3	3	2	3	3	N	3	3	3	3	3	3	3	3	3	3	3	1	3	3	3	1	3	3	24	3	17	3	3	3	3	3	3	3	3	3	3	3	3	3	3	3	3	3	3	3	3	3-	3	3	3	3	3	3	3	3	3	3	3	3	3	3	3	19	3	3	3	3	3	3	3	3	3	3	3	N	3	3	34	3	N	3	3	3	3	3	3	3	1	1	3	N	3	3	3	3	3	2	2	3	3	3	3	3	3	3	3	3	3	3	1	3	3	3	2	2	3	3	3	3	2	3	3	3	N	3	3	69	3	22	3	44	3	3	3	3	3	3	3	3	3	3	3	3	41	1	3	3	3	1	3	3	3	3	N	3	3	3	18	3	3	3	3	3	3	3	3	3	3	3	3	17	3	3	3	3	3	3	2	3	3	2	3	3	3	3	1	3	3	3	3	3	3	3	3	3	1	3	3	3	3	3	3	3	3	3	3	3	1	3	3	3	3	3	2	3	3	3	3	3	0	0
GCA_000184515.2_ASM18451v2_genomic.fna	2	2	15	2	2	2	1	1	2	2	1	2	2	2	2	2	2	2	2	17	2	2	2	2	2	2	2	2	2	2	2	2	2	2	2	2	2	2	2	2	2	2	2	2	2	2	2	2	2	2	8	2	2	2	2	2	2	N	1	2	2	2	2	2	2	45	2	2	2	2	2	N	35	14	2	2	2	2	2	2	2	2	2	2	2	2	2	57	2	2	2	2	2	2	2	2	2	2	2	2	12	2	2	2	2	2	2	2	4	2	N	2	1	2	1	1	2	2	2	2	1	2	2	2	2	2	16	2	2	2	2	2	2	N	2	2	2	2	2	2	2	2	2	2	2	2	2	2	N	2	2	16	2	2	2	2	N	2	2	2	2	2	2	2	N	2	2	16	2	2	2	2	2	2	2	N	2	2	2	2	2	2	2	2	2	2	2	2	16	2	2	2	2	2	2	2	1	1	1	2	1	2	2	2	1	1	1	2	2	1	2	2	2	2	2	2	2	15	2	16	2	2	2	39	15	2	2	2	2	2	2	N	53	2-	2	2	2	2	2	2	2	2	2	2	2	2	2	16	8	2	2	14	2	2	2	2	2	2	15	2	2	2	2	N	N	2	33	2	1	2	2	2	2	2	2	N	2	2	2-	2	2	2	2	2	2	14	2	2	7	2	2	2	2	2	2	2	2	2	1	2	2	2	2	62+	2	15	2	2	2	2	2	2	2	15	2	2	2	2	2	1	2	2	2	2	2	2	2	10	2	2	2	2	2	2	2	1	2	2	2	2	2	2	2	12	2-	1	1	2	2	2	2	1	2	16	2	2	2	43	2	N	2	1	2	2	2	2	2	15	16	15	2	2	2	16	2	2	2	2	2	2	2	2	2	2	2	2	2	2	2	1	2	2	2	2	2	2	2	2	2	2	2	2	N	16	2	2	2	2	2	2	2	2	2	2	2	16	45	17	2	2	2	2	14	2	2	2	1	2	2	2	58	47	2	N	N	2	2	2	2	2	2	2	1	2	63	2	2	2	2	2	1	1	2	N	2	2	2	2	2	2	2	49	2	2	2	N	2	2	2	2	2	2	N	1	2	2	2	2	N	2	2	2	2	2	2	2	2	2	2	2	2	2	2	2	15	2	2	2	15	17	2	2	2	2	2	2	2	2	2	1	2	2	46	2	2	2	1	2	2	2	2	2	2	2	2	2	2	2	2	N	2	15	2	2	16	2	2	2	2	2	2	2	39	2	2	2	N	2	2	2	2	N	2	2	2	2	2	2	2	2	2	2	30	2	2	2	2	2	2	2	2	14	1	2	2	1	2	2	2	2	16	2	2	2	1	2	2	2	2	2	2	2	2	2	16	2	2	2	2	2	2	2	2	16	2	2	2	N	2	1	N	2	2	2	N	2	2	N	2	2	1	1	2	2	2	2	66	2	2	2	2	2	2	2	2	2	2	2	2	2	2	2	2	N	2	2	2	2	N	2	2	15	2	2	1	N	18	2	2	2	2	2	2	61	2	2	2	2	2	2	2	2	2	2	2	2	2	2	2	2	2	2	16	2	2	2	2	1	2	2	2	2	2	2	49	16	2	N	2	2	N	49	2	2	2	2	2	2	2	16	2	2	2	2	2	2	2	2	2	2	45	2	2	2	2	1	2	29	2	2	2	2	2	2	2	2	2	2	2	2	2-	2	2	2	2	2	2	2	2	2	1	2	2	2	2	2	40	2	2	2	2	2	2	2	2	2	2	2	2	2	15	2	2	15	2	2	2	37	1	2	2	1	2	2	2	2	2	2	2	2	2	2	2	1	1	N	2	2	N	2	2	2	2	2	2	2	57	2	215+	2	2	49	2	2	2	2	2	2	2	2	2	2	2	2	2	2	15	2	2	1	2	2	2	2	2	2	2	2	2	2	2	2	2	16	1	N	2	2	2	2	2	N	2	2	2	2	2	2	2	2	2	2	16	2	2	2	2	2	2	2	2	2	2	2	2	2	2	2	N	16	N	2	17	2	N	2	2	2	2	2-	15	2	2	2	2	2	2	2	2	2	2	N	N	2	2	2	2	2	2	2	16	2	2	16	2	2	2	2	2	2	2	2	2	2	364-	2	15	2	2	2	2	2	2	2	2	2	2	2	17	4	2	2	2	10	2	2	15	2	2	15	2	2	N	2	2	2	2	2	16	2	2	2	2	2	2	2	2	2	2	2	2	2	2	2	N	2	N	2	2	2	2	N	2	2	13	2	2	58	2	2	2	2	2	2	2	2	2	1	1	2	2	2	2	2	15	2	2	2	2	1	2	N	2	2	2	2	2	2	2	2	1	2	2	2	2	2	2	2	2	2	2	39	2	2	2	2	2	2	53	2	2	2	2	2	2	2	2	16	2	51	2	2	17	3	3	3	N	16	33	12	11	15	2	2	2	2	2	2	1	2	2	2	N	2	2	2	2	2	2	2	2	2	2	2	2	N	N	2	2	2	2	2	2	2	16	2	2	2	2	2	1	2	2	2	2	2	2	2	15	2	2	2	2	2	41	2	2+	2	2	2	2	2	2	2+	2	2	2	2	2	2	2	2	17	2	2	14	2	2	2	2	2	2	2	2	N	2	16	2	2	2	2	49	2	2	16	2	2	16	2	2	2	2	2	2	N	2	2	2	41	2	2	2	2	2	2	2	2	2	34	16+	2	2	2	2	2	2	2	2	2	83	N	2	2	2	2	2	2	2	2	13	2	2	16	16	N	2	2	2	2	10	2	2	14	8	8	15	2	N	16	15	16	16	15	N	14	2	34	2	2	2	41	2	2	2	2	16	2	2	2	2	57	2	2	2	2	2	2	2	2	2	2	2	2	2	2	2	2	2	2	2	2	2	2	N	2	2	2	2	2	2	2	2	2	2	2	1	2	2	2	2	2	2	2	1	2	1	2	2	15	1	2	2	2	2	2	1	2	2	2	2	2	2	2	2	2	2	2	2	2	2	2	2	2	2	2	2	2-	2	2	2	1	2	2	2	1	2	2	2	2	2	2	2	N	2	1	2	2	2	2	2	2	2	17	2	2	2	N	2	52	2	N	2	2	2	2	1	51	2-	2	2	2	N	2	2	2	2	N	2	2	2	2	2	2	2	2	2	2	2	2	2	2	2	2	N	2	2	2	2	2	N	2	2	1	2	2	36	2	2	2	15	2	2	2	2	2	2	2	2	2	2	2	2	2	2	2	2	2	2	16	2	2	1	1	2-	2	2	1	N	2	2	2	2	2	2	N	2	2	2	2	2	2	2	2	2	2	N	2	2	2	2	2	2+	2	2	N	2	13	2	2	2	2	2	2	1	1	2	2	2	2	2	2	6	2	15	2	2	2	1	2	2	2	2	15	2	2	2	79	2	2	2	2	2	2	2	2	2	N	2	N	N	2	2	2	15	15	N	16	1	2	2	2	2	2	2	2	2	42	2	N	2	1	1	2	2	1	2	2	2	15	2	2	2	2	2	2	2	2	16	1	2	2	2	2	N	1	16	2	2	2	2	2	16	2	2	2	77	2	2	2	2	2	2	2	2	2	2	2	2	2	2	2	2	2	62	2	2	2	2	2	2	2	2-	N	N	49	2	11	N	10	7	13	14	15	14	2	2	2	14	16	2	2	N	2	2	3	2	2	2	2	15	2	2	2	2	2	2	16	2	2	2	2	2	2	2	2	2	2	2	2	2	2	2	42	2	2	N	2	2	2	2	2	2	2	2	2	2	2	2	2	2	N	16	2	14	2	2	N	2	15	2	16	2	2	2	2	2	15	2	N	2	2	2	2	2	16	49	2	14	2	2	2-	2	66+	2	2	16	2	2	2	2	2	2-	2	2	2	2	2	2	1	2	11	2	2	2	2	2	1	2	2	2	2	2	2	2	2	2	2	2	2	2	2	2	2	2	2	2	2	5	2	2	2	30	2	2	2	2	2	16	2	2	12	2	2	2	2	1	2	N	27	2	2	2	1	2	2	2	2	2	2	16	43	49	76	7	6	N	7	7	N	76	7	7	7	41	7	5	7	7	N	7	49	6	7	83	57	7	48	2	N	2	2	2	2	2	2	2	2	N	2	2	1	2	2	2	0?	2	2	2	2	2	2	2	2	2	2	2	2	2	2	2	2	2	2	2	2	2	2	13	2	2	2	2	2	2	1	2	2	2	2	2	1	2	2	2	2	2	2	2	2	2	2	1	1	1	1	2	2	2	48	2	2	2	2	2	2	2	2	2	2	15	N	2	2	2	2	2	2	2	2	2	2	2	2	2	2	N	N	62	1	2	2	2	2	2	2	15	2	2	2	2	2	2	2	2	N	59	2	35	42	28	8	36	1	33	30	67	57	N	1	5	28	45	55	2	2	2	2	2	2	2	N	N	2	2	2	2	2	2	2	2	2	2	1	2	2	2	2	2	2	2	2	N	2	2	2	2	2	2	2	N	2	2	36	13	2	2	2	45	2	2	2	2	2	2	2	2	2	2	2	2	2	7	14	15	N	9	N	N	2	N	2	2	1	2	2	2	N	2	2	2	2	81+	1	2	2	2+	2	44	33	2	2	2	2	N	2	2	2	2	2	1	1	2	2	2	2	N	2	2	2	2	2	2	2	N	2	2	2	2	2	6	2	2	2	2	2	2	2	2	1	2	67	2	2	2	2	2	64	1	2	2	1	1	1	8	2	1	1	1	2	1	1	1	1	1	1	1	1	2	1	1	12	1	2	1	1	2	2	49	2	2	2	2	2	2	2	2	N	1	1	2	2	1	2	2	2	2	6	2	2	2	2	2	2	41	39	2	2	2	2	2	2	2	2	2	2	2	2	2	2	2	2	2	2	2	2	N	2	2	2	2	2	2	2	2	2	2	2	2	15	1	2	1	1	2	2	2	2	2	2	2	2	1	2	2	1	2	2	2	2	17	N	2	2	13	2	2	2	2	17	2	2	2	18	2	4	2	2	2	2	2	2	2	2	2	N	2	2	2	2	2	2	16	13	2	2	2	2	39	2	2	N	2	2	2	N	2	146-	2	2	2	2	2	2	2	2	2	2	2	2	2	2	2	2	2	2	13	2	2	2	15	2	2	2	2	2	N	2	2	16	2	2	2	2	2	2	2	2	2	2	2	2	2	2	2	2	2	2	1	1	2	2	2	16	14	3	15	16	14	15	N	8	35	10	10	10	9	63	18	2	2	1	2	N	2	N	2	2	2	2	2	2	17	10	10	10	11	10	11	15	10	N	10	2	2	2	2	2	2	2	1	3	15	2	2	1	2	2	2	84	2	2	2-	2	2	2	2	2	2	2	2	2	2	2	2	2	2	2	2	2	2	2	2	2	2	N	2	1	N	2	2	2	N	2	15	2	N	1	16	2	2	2	2	2	2	2	2	2	2	2	2	2	2	2	2	2	2	2	2	2	2	0	0
GCA_000186565.1_ASM18656v1_genomic.fna	2	0?	186	145	156	1	1	1	187	130	19	164	1	92	233	206	191-	121	12	0?	4	29	4	64	2	157	1-	1	1	152	42	9	17-	108	116	11	0?	156	190	20-	97-	153	130-	260	7-	18	233	78	68-	209-	254	77	98	119	90	259	277	196	3	222	206	0?	134	121-	268	0?	236	144-	0?	276	255	267	0?	6	129	74	96	329	157	84	160-	443-	153-	237	11-	231	248	0?	259	0?	375-	214-	119	153-	101	36	147	200	126	119	66	0?	60	215-	50-	143-	242-	170	169	30	141	103-	3	5	1	1	2	141	11-	135	3	125	42	57-	198	11	0?	3	195	0?	10	12	216	2-	143	173	48-	116	8	189	0?	96	38	175	150	195	214-	N	1-	274-	0?	0?	341-	88	37	97	3	3	179	81-	192	184	4	29-	69	178	166	206	341-	252-	0?	100	0?	192	34	156	59-	0?	10	0?	206	317-	47	80	126	180	165	196	264-	3	185	119	263-	121	160	180	1	2	122	53-	118-	25-	38-	0?	1	N	1	3	1	1	294-	0?	9	12	63-	107	126-	299	120	56-	43-	30	37	68-	91-	42-	0?	158	110	163	122	111	0?	33-	7	29-	0?	342-	4	224-	42	41	9	173	202	123	26	0?	111-	88	17	124	257-	17	0?	0?	227	236	237	169-	188	56	195	3	0?	0?	0?	416-	1	201	82	53-	12	75	54-	228	186	17-	57	173-	208	3	3	199	20	189	49	120	1	273-	23-	130	39	5	142	161-	131	278-	4	192	157	156-	0?	141	1	234-	136	127	18	0?	109-	145-	1	215	165	1	0?	1-	182	1	143	100	274-	190	184	56-	11	169	210	57-	53	0?	1	166	65	7	270	0?	118	191-	2	6	57	57	268-	1	1	38	30	84	91	7	38	0?	78-	70	66-	113-	214	9	5	1	124-	131	52	1	197-	0?	41-	15-	173	144	124	224	0?	27	437-	132	70-	107	224	77-	100-	162	83	100-	188	2	1	7	162	4	105-	0?	98	70-	55	2	1	34	5-	165	142	192	0?	187	158	23	270	124	299-	4-	152	345-	152	112	167	249	171	166	17	89-	10-	51	215	185	1	141	247-	6	0?	150	214-	174	195	145-	34-	157	100	5-	26	13	1	8	227	91-	1	63	23	167	1	1	7	61-	0?	11	70	94-	171	247-	1-	212	99-	0?	2	103	13-	127	68	117	171-	159	4	1	238-	94	0?	194	9	48	5	63-	125	141	182	9	156	11	185	N	16	25-	27-	27	66	206	193	213	0?	271-	250	46	197	465-	61-	222	233	177	200	1	0?	1	10	312-	4	210	19	1	206	19	186	221	124	2	2	2	0?	49	206	67	24	91-	150	52	0?	5	183-	50-	8	3	226	12	185	15	13	135	11-	106	117-	56	46-	211	97	176	121	0?	137	0?	84	187	352-	191	207	195	141	123	79-	5	1	8-	112	60	1	131	9	8-	24	57-	113	11	224	129	1	95	1	5-	135	9-	182	89-	0?	5-	178-	143	103-	2	1	236	63-	214	115-	209	96-	198-	105	167	1	79	175	1-	1	208	144	64	128	9-	74	241	238-	3	2-	2	1	156	146	5-	0?	42	194	153-	155	106-	167	114-	1	37	295-	173	260-	288	221	180	155	126	376-	214	28	208	242	190	455-	285	0?	142	63-	178	0?	0?	197	89	67-	228	224	231	279	77-	168-	8	34-	341-	2	11	0?	31-	6	183	10	5	137	4	197	475-	133-	60	46-	56	53-	197	249	0?	202	210	121	N	143	0?	204	0?	206	42	188	215	80	7	68	291-	47-	206-	18	59	1-	161	1	19	25	0?	136	0?	128	4-	236	163-	94-	173	11	48	139	5	26	42-	75-	148	111-	0?	165-	175-	12	147	140	206	184	160	111	0?	121-	65-	7	4	194	184	2	133-	135	128	307-	2	158	42-	12	126	9	186	173	0?	0?	174	160-	195	163-	197	39	256-	56	211	68	124	10	71-	1	29-	244	50-	145	87-	10	88-	175	4	69-	0?	111	107-	76-	127	199	197	155	0?	0?	0?	133	2	33	144-	56	5	0?	186	77-	218	227	189	199	1	274	28-	18	95	118-	112	16	0?	2	11-	9	81	22	46-	5	137	0?	2	35-	0?	11-	27	166-	31-	432-	8-	65	6-	6	7	2-	105-	0?	32	357-	171	329-	0?	117	169	25	136	185	160	11-	183	198	229	247	183	0?	179	190	211	40-	213	498-	96	0?	0?	0?	0?	0?	0?	0?	0?	0?	0?	0?	0?	0?	0?	0?	0?	0?	82	0?	178	213	0?	192	0?	196	165-	249	157	3	3	18	3	0?	0?	160	119	38	94-	184	151	0?	0?	203	8	183	185	183	0?	45	279	194	148	200	269-	209-	82-	359-	2	49	274	169	158	21-	202	197	74-	137-	4	197	217	1	55	8	190	159	136	121	244	46	76-	169-	10-	126	322-	12	36	248-	28	199	0?	198	102	26	57	135	181	211	84	5	379-	144	63	143	113	71	122	0?	34	114	114	164	38-	43	62	184	144	146	10	151	5	15	56	305-	154	210	191-	100	98	184	109	35-	6	35	217	92	123	28	1	22	112	290	81	187	143	50	77-	17	201	31	61	3	51	35	28-	159	1	49-	39	32-	0?	36	1	26-	30	112	18	20-	93-	72	74	3	130	21	21	15	60-	60	106-	79	35-	129-	1	68-	65	13-	225-	104	51	5	83	131-	61	44	33	47	136	1	121-	99	144	152	1-	0?	7	11	205	54-	2	6	9-	38	115	81	1	220	151	215	206	204	112	3	122	404-	198	193-	211	24-	28	4	11-	10	9	0?	143	134	232	114	316-	11-	168	159	144	147	5	3	25-	11-	60	4	0?	221	2+	3-	13	191	35	78	22	2	117-	215	260-	154	173	152	2-	175	59-	0?	226	82-	96-	304-	253	83	112-	94-	249-	40-	96-	45	92	206	0?	8	276	181	70-	182	0?	354-	7	4	0?	0?	201	143	152	240	227	191	0?	202	230	157	0?	226	0?	138	225	25	178	179	171	176	179	27	0?	0?	187	162	86	0?	18	1	39	221-	179	304	381-	338-	278	257	183	262	0?	65-	200	211	0?	183-	338	235-	0?	226	0?	21	23-	23	23	150	221	145	34	232	204	107	231	189	264-	174	223	199	94	86	57	69	45	0?	219	0?	77	19	4	210	168	201	85	118-	13	107	284-	1	156	12-	17	224	151-	172	93	0?	4	68	189	69	66-	170	127	152	378-	18-	2	30	2	195	159	3	17	50	10	35	1	2	1	5-	12	241	1	82-	33	32	29-	5	1	102	80	121-	79	3	213	1	184	132	70-	174	182	11	114	13	1	67	103	4	4	4	4	3	1	4	8-	8	26	20	27-	31-	210-	151	1	1	1	1	19	16	168	151-	1	6	6	67-	77-	256	196-	5	0?	154	0?	229	267	68	118	142-	189	8	1	204	8	10	121-	124	31-	187	33	152	143	76	31-	204	169-	243	0?	2	8	189	219	208	84	276-	57	230-	143	75	3	117-	1	57-	448-	40	11	2	114-	33	166-	103	55	152	156	152	0?	70	175	190	5	205	404-	178	32-	219	239	222	187-	270-	180	8	11	10-	130	222	91-	104-	14	2	12	12-	166	13-	0?	39	126	3	29	0?	113-	0?	0?	360-	302	124	172	20	18	21	199	74-	0?	175	14	166	13-	58	244-	133	114	186-	0?	79	0?	24	1-	67-	7	2	2	1	1-	45-	59	44-	151	34	354-	76-	245	2	163	131	1	114	111	7	7	4	35	1	118	202	0?	169	2	2-	2-	131	2	75	162-	144	333-	5	212	8	10-	9	186	74-	193	182	1	3	188	175	26	101	9	177	27	181	2	13	243-	1	1	15	157-	1	132	133	1	0?	29-	164	0?	112	2	106-	365-	32	60	1	183	313-	7	0?	198	8	335	216	3-	11-	165	43	5-	47-	119-	107-	0?	0?	185	10	65-	75-	44-	96	2-	6	54	48	122	136	120	1	3-	23-	260	18	165	54	222	3	31-	42	3	167	0?	72-	59	74-	55	12	22	88-	182	154	0?	0?	61-	21	0?	280	226	96	232	72	0?	121-	0?	196	173	180	237	66-	320-	335-	0?	214-	221	227	189	209	0?	0?	212	211-	203	482-	3	148	0?	30-	160	14	0?	35	1	17	11	86	13	10	31	17	78-	10	6	6	204	180	25-	0?	0?	115	262	194	284-	123	157	109	80	278	102	63	196	363-	113	131	61	141	182	184-	194	112	112	191	6	272-	102-	44	215-	38	362-	133	130-	166	160	4	216	160	43	3	63	139	3-	64-	20	5	202	109	108	1	18	68	3	61-	60	5	59	3	175	15	125	185-	66	182	104-	98	142	153	122	264-	126	71-	160	121-	54	17-	17	112	5	154	71-	109	75	161	63	1	202	0?	192	34-	55-	1	33	61-	48	25	1-	133	30	23	18	9	29-	125	93	7	39-	169	160	46	166	151	184	289-	95-	163	177	214-	106	191	294	69	10-	179	67	118-	2	159	0?	N	186	0?	96	108	308	213	151	170	310	13-	81	189	2	149	185	36	153	277	122	163	71	1	150	27-	212	0?	180	1	141	38	70-	42	0?	240	1	5	122-	106	73-	9+	N	79	38	206	105-	176	52-	231	128	183-	152	98	0?	41-	0?	1	2	148	86	145	54	1	160-	4	19	5	168	N	91	90	0?	59	19-	122	3	1	5	119	210	6	0?	0?	21	38-	63	155	72-	0?	206	222	230	187	197	135	276-	7	162	64-	150-	99-	179	128	161	138	146	294-	187	161	169-	1	9-	126	140	6	1	0?	212	167	5-	193	16	147	323-	3	23	188	223	26	58-	61	2	2	158	1	143	6	285	423-	79	2	8	41	166	0?	202	28-	39	137	124	139	52	158	173	50	55	1	39	15	56-	185-	158	80	30	11	27	167	2	52	18-	261	168	35-	192	27	9-	9	10	29	9-	42	58	122	129-	140	92	166	45	2	0?	151	105	164	0?	110	64-	78	0?	0?	116	76	42	335-	0?	60	79-	N	138	0?	148-	172	184	138	22	1	0?	272-	195	17	35	30	45-	13	39-	46-	79	11	7	11-	176	90	140-	185	110	177	9	51-	34	144	120	164	1	3	117	1	26	11	153-	1	126	26	3	139-	131	0?	121-	150	2	131-	119	16	5	128	151	151	23	24	17	0?	236	3	16	238	164-	197	64	1	348-	217	1	16-	40	1	1	1	158	24	1	1	1	2	12	1-	8-	1	1	1	1	1	1	1	1	8	1	1	1	17-	41	324-	0?	84	68	134	157	203-	39	238	137	148	84	31-	129	5	86	5	94-	153	0?	11	224-	64-	15-	N	141	3	177	191	0?	0?	248	167	18	82	75	177	197	231	156	307-	37-	164	115	95	107	9-	167	89	59-	110	75	18	11	189	172	132	17	173-	4	4-	10	222	1	151-	31-	2-	11	203	31-	35-	5	5	3	32	1	0?	1	1	65	86	103	181	187-	153	195	2	169-	113	3	200-	0?	80	22	150	191	249-	38-	1	3	182	35	202	185	162	12	3	140	228	0?	147	0?	0?	133	198	220	62	188-	78	31	29	147	31-	191	194	216	209	18	180	206	122-	0?	245	222	51	71	0?	61	49	61-	217	202	74-	59-	233	220	56-	224	29-	16	228	102-	200-	28	174	216	163	222-	0?	226	11	360-	419	163	20	150	0?	0?	28	166	52-	186	1	46-	131	0?	146	189-	100-	17	187-	95	1	165	243	68-	101	1	163	37-	26	70	167	110	1	148-	15	197-	1	4	239-	229	25-	2-	1	172	98	38	309-	54	336-	244	6	0?	9	206	111	190	113	117	187	22-	0?	207	215	34	16	5	89	1	0?	184	54	11-	32-	6-	91-	203	0?	0?	217	229	557-	232	157	219	189	162	208	221	12	6	15-	29	229	218	267-	100	5	68	1	172	137-	178	10	2	62-	2	166	110-	1	151	203	203	182	260-	17-	22	3	170	1	0?	298-	128	0?	0?	0?	311-	203-	252	189	196	1	188	91-	190	206	154	6	33-	4	119	235	115	0	0
GCA_000186645.2_ASM18664v2_genomic.fna	4	6	6	6	6	1	2	1	6	6	2	6	3	3	6	6	6	6	12	6	1	5	6+	6	3	6	6	5	5	6	2	5	6	6	5	5	6	6	6	6	5	6	6	6	6	6	6	6	3	6	6	6	5	6	12	14	14	14	1	1	13	13	13	12	13	6	6	6	6	6	6	6	6	6	6	6	6	6	6	6	6	6	6	6	6	6	6	6	6	6	6	6	5	6	5	6	6	6	6	5	6	5	6	5	5	6	6	6	5	6	6	6	3	5	1	1	2	5	2	6	4	6	6	6	5	6	6	6	6	6	5	6	6	N	6	6	4	6	6	6	6	5	5	5	6	6	5	6	5	6	6	6	6	6	5	6	1	1	1	1	13	1	1	1	1	6	6	5	5	5	6	4	1	1	1	6	1	1	1	1	1	1-	1	1	1	1	1	1	1	1	1	1	1	1	1	6	4	1	1	1	1	1	1	1-	1	1	1	1	1	1	1	1	1	1	1-	1	1	1	1	1	1	1	1	1	1	1	1	1	6	1	1	1	1	1	1	1	1	1	1	1	1	1	1	1	1	1	1	1	1	1	1	1	1	1	1	1	1	1	1	1	1	1	1	1	1	1	1	1	1	1	1	1	1	1	1	6	1	1	1	1	1	1	1	1	1	1	1	1	1	1	1	1	1	1	1	1	1	1	1	1	1	1	1	1	1	1	1	1	1	1	1	1	1	1	1	1	1	1	1	1	1	1	1	1	1	1	1	1	1	1	1	84	1	1	1	1	1	1	1	1	1	1	1	1	1	1	1	1	1	1	1	1	1	1	1	1	1	1	1	1	1	1	1	1	1	1	1	1	1	1	1	1	1	91	1	1	1	1	1	1	1	1	1	1	1	1	1	1	1	1	1	1	1	1	1	6	1	1	1	1	1	1	1	1	1	1	1	1	1	1	1	1	1	1	1	1	1	6	13	1	1	1	1	1	1	1	1	1	1	1	1	1	1	1	1	1	1	1	1	1	1	1	1	1	1	1	1	1	1	1	1	1	1	1	1	1	1	1	1	1	1	1	1	221-	1	1	1	1-	1	1	1	1	1	1	1	1	1	1	1	1	1	1	1	6	1	1	1	1	1	1	1	1	1	1	1	1	1	1	1	1	1	1	1	1	1	1	1	1	1	1	1	1	1	1	1	1	1	1	1	1	1	1	1	1	1	1	1	1	6	1	1	1	1	1	1	1	1	1	1	3	1	1	1	1	1	1	1	1	1	1	1	N	1	1	1	1	1	1	1	1	1	1	1	1	1	1	1	1	1	1	1	1	1	1	1	1	1	1	1	6	1	1	1	1	1	1	1	1	6	1	1	1	6	1	1	1	1	1	1	1	1	1	1	1	1	1	1	1	1	1	N	1	1	1	1	1	1	1	1	1	1	N	1	1	1	1	1	1	1	1	1	1	1	1	1	1	1	1	1	1	1	1	1	1	1	1	6	1	19	1	12	11	11	12	10	12	13	13	11	12	11	11	11-	13	13	1	1	1	1	1	1	1	1	1	1	1	1	188-	1	1	1	1	N	1	1	1	1	1	1	1	1	1	1	1	1	1	6	1	6	1	1	1	1	1	1	1	1	1	1	1	1	1	1	1	1	1	1	1	1	0?	1	1	1	1	1	1	1	1	1	1	1	1	1	1	1	1	1	1	1	1	1	1	1	1	1	1	1	1	1	6	1	1	1	1	1	1	1	1	1	1	1	1	1	20	1	1	1	45	1	1	1	1	1	1	1	1	1	1	1	1	1	1	38	1	1	1	1	1	1	1	1	1	6	1	N	1	1	1	1	1	1	1	1	1	1	1	1	1	1	1	1	1	1	1	6	1	1	1	1	1	1	1	1	1	1	1	1	1	1	59	1	1	1	1	1	1	1	1	1	1	1	1	1	1	1	1	1	1	1	1	1	1	1	1	1	1	1	1	1	1	1	1	1	1	1	1	1	1	1	1	1	6	1	1	1	1	1	1	1	1	1	1	6	1	1	1	1	1	1	1	1	1	1	1	1	1	1	1	1	1	1	1	1	1	1	1	1	1	1	1	1	1	1	1	1	1	1	1	1	1	1	1	1	1	1	1	1	1	1	1	1	1	1	1	1	75	1	1	1	1	1	1	1	1	1	1	1	1	1	1	1	1	1	1	1	1	1	1	1	1	1	6	1	1	1	1	1	1	1	1	1	1	1	6	1	1	1	1	1	1	1	N	1	1	1	1	1	1	1	1	1	1	1	1	1	1	1	1	1	1	1-	1	1	1	1	1	1	1	1	1	1	1	1	1	1	1	1	1	1	1	1	1	1	1	1	1	1	1	1	1	1	1	1	1-	1	1	1	1	1	1	1	1	1	1	1	1	6-	1	1	1	1	1	1	1	1	1	1-	1	1	1	1	1	1	1	1	1	1	1	1	1	1	1	1	1	N	5	1	1	1	1	1	1	1	1	1	1	1	1-	1	1	1	1	8	1	1	1	1	1	1	1	1	1	1	1	1	1	6	1	1	1	1	1	1	1	1	1	1	1	1	1	1	1	1	1	1	1	1	1	1	1	1	1	1	1	1	1	1	1	1	1	1	1	1	1	1	1	1	1	1	1	1	1	1	1	1	1	1	1	1	1	1	1	1	1-	1	6	438+	6	1	1	1	1	1	1	1	1	1	1	1	1	1	1	1	1	1	1	1	1	1	1	1	1	1	1	1	1	1	1	1	1	1	1	1	N	1	1	1	1	1	1	1-	1	1	1	1	1	1	1-	1	1	N	6	1	1	1	1	1	1	1	1	1	1	1	1-	1	1	1	1	1	1	1	1	1	1	1	1	1	1	1	1	N	1	1	1	1	1	1	40	1	1	1	1	1	1	6	1	1	1	1	1	1	1	1	1	1	1	1	N	1	1	1-	1	1	1	1	1	1	1	1	1	1	1	1	1	1	1	1	6	1	1	1	1	1	1	1	1	1	1	1	1	1	1	1	N	1	1	1	1	1	1	1	1	1	1	1	1	1	1	1	1	1	1	1	1	1	1	1	1	1	1	1	1	6	1	1	1	1	1	1	1	1	1	1	1	1	1	84-	1	1	1	1	1	6	1	N	1	1	1	1	1	1	6	1	1-	1	1	1	1	1	1	1	1	1	1	1	1	1	1	1	1	1	1	1	1	1	1	1	1	1	1	1	1	1	1	6	1	1	1	1	1	6	1	1	1	1	1	1	1	1	1	1	1	1	1	1	1	1	1	1	1	1	1	1	1	1	1	1	1	1	1	1	1	6	1	1	1	1	1	1	1	1	1	1	1	1	1-	1	6	1	1	1	1	1	1	1	1	1	1	1	1	1	1	1	1	1	1	1	1	1	1	1	N	1	1	1	1-	1	1	1	1	1	1	1+	1	1	1	1	1	1	1	1	6	1	1	1	1	1	3	1	1	1	1	1	1	1	1	1	1	1	1-	1	1	1	1	1	1	1	1	1	1	1	1	1	1	1	1-	1	1	1	1	1	1	1	1	1-	6	1	1	1	6	1	1	1	1	1	1	1	1	1	1	1	1	1	1	1	1	1	1	1	1	1	1	1	1	1	1	1	6	5	5	5	6	5	5	5	5	5	6	5	4	5	5	1	6	6	1	1	N	6	5	5	5	1	1	1	1	1	1	1	1	1	1	1	1	1	1	1	1	1	1	1	1	1	1	1	1	1	1	1	1	1	1	1	1	1	1	1	1	1	1	1	1	1	1+	1	1	1	6	1	1	1	1	1	1	1	1	1	1	1	1	5	1	1	1	1	1	1	1	1	1	1	1	1	1	1	1	1	1	1	1	1	1	1	1	1	1	1	N	1	1	1	1	1	1	1	1	1	1	1	1	1	1	1	1	1	1	1	1	1	1	1	1	1	1	6	1	1	1	1	1	1	1	1	73	1	1	1	1	1	1	1	1	1-	1	1	1	1	1	1	1	1	6	1	1	1-	1	1	1	1	1	1	1	1	1	1	1	1	1	1	1	1	1	1	1	1	1	1	1	6	1	1	1	1	1	1	1	1	1	N	1	1	1	1	1	6	1	1	1	1	1	1	1	1	1	1	1	6	1	1	1	1	1	1	1	1	1	1	1	1	1	1	1	1	1	1	1	1	6	1	1	1	1	1	1	1	1	1	1	1	1	1	1	1	1	1	1	1	1	1	1	1	1-	1	1	1	1	1	1	1	1	1	1	1	1	1	1	1	1	1	1	1	1	1	1	1	1	6	1	1	1	1	1	1	1	1	1	1	1	1	1	1	1	1	1	1	1	1	1	1	1	1	1	1	1	1	1	1	1	1	1	1	1	1	1	1	1	1	1	1	1	1	1	1	1	1	1	1	1	1	1	1	1	1	1	1	1	1	1	1	1	1	1	1	1	1	1	88-	1	1	1	1	1	1	1	1	1	1	1	6	1	1	1	1	1	1	1	1	1	1	1	1	1	1	1	1	1	1	1	1	1	1	1	1	1	1	6	1	1	1	1	1	1	1	1	4	1	1	1	1	1	1	1	1	1	1	1	1	1	1	1	1	1	1	1	1	1	1	6	1	1	1	1	1	1	1	1	1	1	1	1	1	1	1	1	1	1	1	1	1	1	1	1	1	1	1	1	1	1	1	1	1	1	1	1	1	1	1	1-	1	1	1	1	1	1	1	1	1	1	1	3	1	1	1	1	1	1	1	1	3	1	1	1	1	1	1	1	1	1	1	1	1	1	1	1	1	1	1	1	1	1	1	1	1	1	1	1	1	1	1	1	1	1	1	1	1	1	1	1	1	1	1	1	1	1	1	1	1	1	1	1	1	1	1	1	1	1	1	1	1	1	3	1	1	1	1	1	1	1	1	1	1	1	1	1	1	1	1	6	1	1	1	1	1	1	6	6	6	6	6	6	9	2	6	1	2	5	1	1	1	6	6	6	3	6	6	6	6	6-	189-	6	6	6	6	14	1	5	6	1	6	6	6	5	6	6	6	6	6	6	6	6	21	6	6	6	6	6	6	6	6	6	6-	6	6	6	6	6	6	6	6	6	6	6	6	6	6	6	6	6	3	81	3	3	3	3	3	3	3	3	6	3	3	3	3	6	3	6	6	12	6	6	N	6	6	6	6	6	6	6	5	5	6	N	6	13	6	6	6	5	1	6	6	6	6	3	5	6	6	6-	6	6	4	6-	6	6-	4	N	6	6	6	5	3	6	N	6	6	6	6	6	6	6	6	6	6	6	6	6	6	6	6	6	6	160+	6	6	2	1	6	6	6	3	3	6	6	6	6	6	6	6	5	5	5	5	13	6	6	6	6	6	6	6	6	6	5	5	5	4	6	6	5	6	5	2	5	6	6	6	2	6	6	6	6	6	6	6	6	6	3	6	13	6	6	6	6	6	6	6	6	6	4	5	5	6	6	5	5	6	6	6	13	6+	0	0
GCA_000186665.4_ASM18666v4_genomic.fna	29	88	40	36	54	1	1	1	52	64	1	15	1	5	61	59	58	17	16	19	12	11	17	18	11	18	17	9	15	16	2	22	N	13	9	13	18	46	52	15	7	16	19	19	18	18	21	8	2	18	20	19	8	9	18	9	21	20	1	19	18	20	19	17	18	19	19	18	18	17	18	18	18	15	16	15	15	18	18	17	17	17	13	17	86	17	19	70	20	18	196	15	3	16	11	4	14	15	13	12	14	13	11	10	4	16	15	15	15	13	51	39	1	5	1	16	2	44	17	50	2	50	41	53	69	40	49	39	62	59	17	29	64	N	209-	54	4	44	N	51	83	2	1	59	47	56	39	60	42	61	61	103	54	34	29	37	3	3	63	8	59	55	22	1	42	49	58	84	57	45	56	40	50	59	42	47	2	75	5	61	62	30	1	45	46	53	53	61	50	10	54	48	21	43	47	53	1	2	39	48	71	12	13	60	1	1	7	26	1	1	126	78	3	4	2	7	55	103	50	51	39	20	7	69	54	43	59	49	10	48	37	33	64	52	28	1	48	55	4	12	54	2	44	50	53	11	48	93	8	9	14	42	67	5	74	51	60	68	72	35	49	41	53	16	83	76	66	78	1	60	12	43	40	47	109	72	0?	0?	6	33	49	3	3	56	29	67	49	50	6	67	38	45	5	28	57	69	56	56	6	51	55	72	71	47	9	62	44	43	40	59	58	69	1	87	50	3	67	13	60	3	46	49	48	45	53	42	49	51	66	53	50	64	4	N	5	1	83	50	41	76	4	6	28	18	64	1	1	21	27	43	7	1	44	84	8	3	11	50	62	56	28	1	29	43	5	4	5	90	64	15	55	5	5	68	70	53	67	4	65	12	65	60	57	0?	52	60	69	39	3	33	48	12	50	56	2	61	14	2	3	52	29	48	3	63	65	66	51	33	79	54	92	28	48	63	N	66	54	73	56	26	11	48	48	3	69	63	4	16	49	55	70	16	38	52	58	45	46	49	14	4	44	21	1	2	73	63	1	36	37	58	1	12	45	41	64	2	65	1	49	49	5	61	48	59	24	2	30	46	7	41	50	50	1	1	53	10	54	70	53	26	20	41	0?	48	52	16	54	37	53	45	32	46	52	50	52	53	51	64	96	63	77	57	9	61	55	60	64	55	60	1	94	1	58	71	1	59	1	13	60	31	58	63	37	21	2	17	80	52	59	37	36	6	53	1	80	18	48	42	17	3	60	37	48	48	38	55	31	41	61	50	41	64	16	69	40	69	20	62	32	63	55	70	60	65	52	41	46	3	1	52	39	1	1	41	35	1	N	83	55	48	N	42	6	21	9	4	N	19	58	51	57	48	54	46	78	26	3	83	53	59	56	62	48	63	45	51	22	53	55	1	2	30	60	28	39	37	36	69	51	12	11	14	11	46	48	1	77	1	54	10	45	45	57	6	1	18	51	47	48	77	61	55	45	51	62	59	52	54	67	58	71	89	63	70	38	21	0?	81	54	42	60	62	59	74	86	48	11	3	31	62	37	25	68	31	6	33	28	10	47	4	58	52	73	57	2	6	47	64	66	67	54	57	42	62	11	104	14	52	62	19	50	61	32	16	54	38	8	48	65	52	13	59	2	4	1	53	37	52	38	N	86	51	46	47	30	6	9	7	32	43	45	59	12	65	39	48	3	3	47	63	47	58	42	73	5	5	8	21	57	57	N	35	41	43	46	34	52	15	42	47	22	48	48	74	67	48	61	55	37	62	0?	48	13	80	71	40	31	44	1	50	68	38	44	49	13	86	58	N	55	77	12	23	68	49	71	60	54	27	46	65	43	2	2	42	7	1	118	54	60	57	65	56	60	25	78	13	12	35	3	42	10	64	2	44	N	7	59	42	14	N	70	13	48	56	45	35	31	42	88	59	44	44	37	45	2	40	76	21	54	54	48	58	43	52	4	46	56	58	61	59	64	66	82	0?	0?	0?	0?	0?	0?	0?	0?	0?	0?	0?	0?	0?	0?	0?	0?	0?	0?	0?	0?	0?	0?	0?	0?	0?	0?	49	111	51	56	67	9	61	57	33	75	50	3	1	23	17	57	63	50	46	11	44	52	43	64	97	54	13	55	50	51	56	52	65	49	46	54	53	54	51	57	2	2	90	56	49	50	59	58	54	103	3	61	N	1	37	31	55	51	48	36	86	45	24	32	46	54	51	20	5	56	44	47	101	53	39	6	48	42	46	58	70	46	59	50	38	41	5	43	43	52	1	41	39	N	46	46	17	53	6	45	23	48	35	5	16	70	49	65	70	34	26	57	40	20	12	68	59	11	34	N	1	46	N	71	34	55	50	1	48	26	56	1	58	2	47	48	23	48	1	4	4	0?	52	45	4	4	41	41	15	41	47	38	46	3	49	35	37	54	36	34	61	1	1	78	3	3	37	14	50	67	13	31	54	56	58	32	1	35	4	7	22	29	47	46	3	84	10	27+	60	3	2	26	42	4	34	22	1	61	N	81	66	54	56	23	35	60	57	65	61	49	58	N	56	35	12	65	51	64	66	0?	54	N	70	45	48	48	24	14	27	14	9	8	54	12	1	3	3	3	3	3	1	3	33	64	57	23	61	52	49	51	59	58	62	53	60	56	63	49	69	61	11	51	59	32	51	63	72	30	100	55	43	55	53	50	9	11	51	64	62	49	49	78	80	49	64	59	62	48	52	58	119	3	56	39	51	53	51	50	52	2	92	67	58	48	15	66	1	7	42	50	55	85	46	69	84	71	53	76	71	53	70	60	52	82	120	50	52	56	78	52	59	60	57	48	61	4	29	72	61	39	61	N	55	54	71	56	62	55	2	45	2	65	53	62	4	42	4	59	48	54	52	43	47	42	1	3	52	61	47	69	1	58	1	64	N	45	50	45	41	52	62	52	67	56	4	1-	2	60	56	2	2	63	30	50	1	2	11	23	2	98	11	3	49	44	47	16	1	29	48	73	1	3	59	19	54	45	58	58	5	5	42	5	1	5	5	44	3	49	32	8	43	7	48	54	13	7	37	47	70	48	10	1	43	49	5	19	28	27	3	42	15	17	28	98	54	47	72	55	82	61	77	5	42	47	53	4	1	60	31	52	30	40	46	18	53	50	45	28	66	72	24	64	71	45	56	48	55	56	26	51	N	59	8	28	15	31	14	61	75	61	29	2	2	2	51	37	44	50	52	7	133	27	49	67	33	62	89	56	51	64	70	65	49	43	56	18	26	44	4	70	61	2	6	4	50	46	53	18	62	26	80	14	45	59	51	89	11	96	96	43	54	51	43	57	57	52	N	51	48	50	30	43	52	44	42	63	66	68	68	32	3	59	30	2	4	1	1	48	51	41	55	45	100	48	89	3	49	41	1	61	59	50	11	60	53	5	40	59	82	21	8	61	50	N	15	28	12	56	58	20	67	63	78	49	49	52	48	60	1	1	59	53	26	47	26	60	35	75	4	1	44	1	5	29	20	1	54	39	23	78	22	51	64	50	11	22	55	9	71	1	48	55	31	59	54	34	128	52	26	22	46	48	63	2	77	71	93	62	53	47	42	30	4	73	35	24	40	33	48	33	N	27	1	12	107	54	33	7	70	37	41	54	45	63	62	59	47	63	54	4	1	40	57	50	63	65	60	38	60	72	56	36	57	24	52	71	65	56	52	52	63	61	55	55	71	67	62	70	50	55	62	68	57	54	60	75	3	44	62	1	28	1	43	47	42	32	29	52	44	31	62	41	48	N	55	49	64	21	8	67	82	26	94	57	60	N	49	56	44	94	39	82	53	51	43	48	26	51	5	5	58	38	35	48	10	37	59	61	74	37	60	43	54	15	55	4	78	52	52	60	54	45	45	49	58	11	58	42	56	1	N	64	28	46	48	5	38	3	60	15	44	58	N	64	56	2	18	53	44	56	43	57	55	41	56	26	48	117	48	52	7	8	24	53	25	2	61	80	62	3	69	7	41	24	60	13	1	10	44	37	30	24	32	45	38	52	42	62	5	3	47	53	5	62	52	57	74	55	2	63	88	52	2	N	49	53	2	51	57	67	57	59	31	57	98	66	52	61	0?	37	1	58	2	53	34	9	50	84	0?	63-	30	1	59	64	67	0?	61	20	48	54	1	1	1	81	13	5	6	53	90	4	26	10	3	0?	56	62	46	103	11	1	22	9	66	28	26	1	2	43	17	46	24	1	56	1	46	37	50	41	3	38	54	58	7	39	3	1	5	9	73	7	72	56	44	44	10	41	43	76	1	67	68	65	56	42	50	37	53	36	82	52	55	62	52	20	16	61	60	49	76	2	64	43	48	47	9	68	61	50	5	5	52	46	78	3	61	N	68	14	59	9	31	26	52	1	50	45	80	78	2	1	11	34	10	70	49	3	2	45	37	48	17	38	51	0?	N	2	6	15	49	81	47	81	51	1	2	47	32	35	67	69	8	41	51	40	19	15	58	30	70	44	N	41	57	43	54	47	46	38	2	49	2	54	60	47	58	34	62	70	43	1	43	62	33	54	71	40	44	77	93	47	47	44	51	1	2	47	64	46	4	49	3	13	63	1	21	31	26	27	56	40	25	55	40	51	10	20	17	48	9	51	1	3	39	2	35	48	N	1	41	37	11	21	50	61	56	49	2	48	18	46	1	53	52	52	37	28	38	61	70	1	8	82	14	68	39	4	55	80	1	1	2	1	1	1	29	6	1	1	1	3	1	1	1	1	1	1	1	2	16	1	1	8	1	1	1	1	40	54	61	37	8	2	46	60	33	64	46	57	31	9	43	5	1	5	50	9	51	38	48	55	N	58	41	4	53	47	52	55	64	45	3	18	6	54	48	84	32	160	58	56	36	28	40	44	52	42	60	37	45	36	17	51	51	43	48	34	50	47	55	85	1	38	23	2	39	0?	33	2	5	5	49	32	1	65	1	1	40	96	20	69	118	49	70	1	24	44	40	61	82	55	23	48	64	66	83	8	40	58	1	59	54	41	12	50	41	10	48	50	64	77	16	71	64	32	47	50	54	17	47	54	56	59	60	61	9	57	59	51	64	62	58	56	424-	396-	62	44	54	59	55	46	60	58	55	57	58	42	31	61	57	45	29	42	53	43	79	62	74	40	63	165	51	40	46	65	110	41	51	66	53	3	55	12	63	48	57	9	39	55	18	22	65	63	45	53	47	48	7	54	65	53	58	1	76	47	44	9	11	48	70	6	5	3	66	36	34	N	44	49	89	53	83	30	64	33	48	27	36	59	57	46	62	73	69	42	56	N	1	25	62	55	15	3	61	54	27	107-	0?	62	70	163	70	49	59	N	57	N	72	37	51	48	10	59	80	53	38	36	2	6	55	61	53	13	2	45	21	59	36	1	53	66	59	52	96	N	24	25	53	20	70	83	20	79	50	55	53	51	75	31	32	1	51	45	56	70	46	6	53	53	56	70	35	0	0
GCA_000187205.4_ASM18720v4_genomic.fna	4	6	6	6	6	1	2	1	6	6	2	6	3	3	6	6	17	17	16	19	12	11	17	18	11	18	17	9	15	16	2	12	15	13	9	13	18	16	18	15	7	16	19	19	18	18	21	8	2	18	20	19	8	9	18	9	21	20	1	19	18	20	19	17	18	19	19	18	18	17	18	18	18	15	16	15	15	18	18	17	17	17	13	17	18	17	19	20	20	18	196	15	3	16	11	4	14	15	13	12	14	13	11	10	4	16	15	15	15	13	15	6	3	5	1	1	2	5	2	6	4	6	6	6	5	6	6	6	6	6	5	6	6	N	6	6	4	6	6	6	6	5	5	5	6	6	5	6	5	6	6	6	6	6	5	6	1	1	1	1	13	1	1	1	1	6	6	5	5	5	6	4	1	1	1	6	1	1	1	1	1	1	1	1	1	1	1	1	1	1	1	1	1	1	1	6	4	1	1	1	1	1	1	1	1	1	1	1	1	1	1	1	1	1	1	1	1	1	1	1	1	1	1	1	1	1	1	1	6	1	1	1	1	1	1	1	1	1	1	1	1	1	1	1	1	1	1	1	1	1	1	1	1	1	1	1	1	1	1	1	1	1	1	1	1	1	1	1	1	1	1	1	1	1	1	6	1	1	1	1	1	1	1	1	1	1	1	1	1	1	1	1	1	1	1	1	1	1	1	1	1	1	1	1	1	1	1	1	1	1	1	1	1	1	1	1	1	1	1	1	1	1	1	1	1	1	1	1	1	1	1	1	1	1	1	1	1	1	1	1	1	1	1	1	1	1	1	1	1	1	1	1	1	1	1	1	1	1	1	1	1	1	1	1	1	1	1	1	1	1	1	1	1	1	1	1	1	1	1	1	1	1	1	1	1	1	1	1	1	1	1	1	1	1	1	6	1	1	1	1	1	1	1	1	1	1	1	1	1	1	1	1	1	1	1	1	1	6	13	1	1	1	1	1	1	1	1	1	1	1	1	1	1	1	1	1	1	1	1	1	1	1	1	1	1	1	1	1	1	1	1	1	1	1	1	1	1	1	1	1	1	1	1	1	1	N	1	1	1	1	1	1	1	1	1	1	1	1	1	1	1	1	1	6	1	1	1	1	1	1	1	1	1	1	1	1	1	1	1	1	1	1	1	1	1	1	1	1	1	1	1	1	1	1	1	1	1	1	1	1	1	1	1	1	1	1	1	1	6	1	1	1	1	1	1	1	1	1	1	3	1	1	1	1	1	1	1	1	1	1	N	1	1	1	1	1	1	1	1	1	1	1	1	1	1	1	1	1	1	1	1	1	1	1	1	1	1	1	1	6	1	1	1	1	1	1	1	1	6	1	1	1	6	1	1	1	1	1	1	1	1	1	1	1	1	1	1	1	1	1	1	1	1	1	1	1	1	16	1	1	1	1	1	1	1	1	1	1	1	1	1	1	1	1	1	1	1	1	1	1	1	1	1	1	1	1	6	1	1	1	12	11	11	12	10	12	13	13	11	12	11	11	11	13	13	1	1	1	1	1	1	1	1	1	1	1	1	1	1	1	1	1	1	1	1	1	1	1	1	1	1	1	1	1	1	1	6	1	6	1	1	1	1	1	1	1	1	1	1	1	1	1	1	1	1	1	1	1	1	1	1	1	1	1	1	1	1	1	1	1	1	1	1	1	1	1	1	1	1	1	1	1	1	1	1	1	1	1	1	6	1	1	1	1	1	1	1	1	1	1	1	1	1	1	1	1	1	1	1	1	1	1	1	1	1	1	1	1	1	1	1	1	1	1	1	1	1	1	1	1	1	1	6	1	1	1	1	1	1	1	1	1	1	1	1	1	1	1	1	1	1	1	1	1	6	1	1	1	1	1	1	1	1	1	1	1	1	1	1	1	1	1	1	1	1	1	1	1	1	1	1	1	1	1	1	1	1	1	1	1-	1	1	1	1	1	1	1	1	1	1	1	1	1	1	1	1	1	1	1	1	1	6	1	1	1	1	1	1	1	1	1	1	6	1	1	1	1	1	1	1	1	1	1	1	1	1	1	1	1	1	1	1	1	1	1	1	1	1	1	1	1	1	1	1	1	1	1	1	1	1	1	1	1	1	1	1	1	1	1	1	1	1	1	1	1	1	1	1	1	1	1	1	1	1	1	1	1	1	1	1	1	1	1	1	1	1	1	1	1	1	1	6	1	1	1	1	1	1	1	1	1	1	1	6	1	1	1	1	1	1	1	1	1	1	53	1	1	1	1	1	1	1	1	1	1	1	1	1	1	1	1	1	1	1	1	1	1	1	1	1	1	1	1	1	1	1	1	1	1	1	1	1	1	1	1	1	1	1	1	1	1	1	1	1	1	1	1	1	68	1	1	1	1	1	1	1	6	1	1	1	1	1	1	1	1	1	1	1	1	1	1	1	1	1	1	1	1	1	1	1	1	1	1	1	1	5	1	1	1	1	1	1	1	1	1	1	66	1	1	1	1	1	8	1	1	1	1	1	1	1	1	1	1	1	1	1	6	72	1	1	1	1	1	1	1	1	1	1	1	1	1	1	1	1	1	1	1	1	1	1	1	1	1	1	1	1	1	1	1	1	1	1	1	1	1	1	1	1	1	1	1	1	1	1	1	1	1	1	1	1	1	1	1	1	1	6	438+	6	1	1	1	1	1	1	1	1	1	1	1	1	1	1	1	1	1	1	1	1	1	1	1	1	1	1	1	1	1	1	1	1	1	1	1	1	1	1	1	1	1	1	1	1	1	1	1	1	1	1	1	1	1	6	1	1	1	1	1	1	1	1	1	1	1	1	1	1	1	1	1	1	1	1	1	1	1	1	1	1	1	1	1	1	1	1	1	1	1	1	1	1	1	1	1	1	6	1	1	1	1	1	1	1	1	1	1	1	1	1	1	1	1	1	1	1	1	1	1	1	1	1	1	1	1	1	1	1	1	6	1	1	1	1	1	1	1	1	1	1	1	1	1	1	1	1	1	1	1	1	1	1	1	1	1	1	1	1	1	75	1	1	1	1	1	1	1	1	1	1	1	1	1	1	6	1	1	1	1	6	1	1	1	1	1	1	1	1	1	1	1	1	1	1	6	1	1	1	1	1	1	1	1	6	1	1	1	1	1	1	1	1	1	1	1	1	1	1	1	1	1	1	1	1	1	N	1	1	1	1	1	1	1	1	1	1	6	1	1	55	1	1	6	1	1	1	1	N	1	1	1	1	1	1	1	1	1	1	1	1	1	1	1	1	1	1	1	1	1	1	1	1	1	1	6	1	1	1	1	1	1	1	1	1	1	1	1	1	1	6	1	1	1	1	1	1	1	1	1	1	1	1	1	1	1	1	1	1	1	1	1	1	1	1	1	1	1	1	1	1	1	1	1	1	1+	1	1	1	N	1	1	1	1	6	1	1	1	1	1	1	1	1	1	1	1	1	1	1	1	1	1	1	1	1	1	1	1	1	1	1	1	1	1	1	1	1	1	1	1	1	1	1	1	1	1	1	1	6	1	1	1	6	1	1	1	1	1	1	1	1	1	1	1	1	1	1	1	1	1	1	1	1	1	1	1	1	1	1	1	6	5	5	5	6	5	5	5	5	5	6	5	4	5	5	1	6	6	1	1	6	6	5	5	N	1	1	1	1	1	1	1	1	1	1	1	1	1	1	1	1	1	1	1	1	1	1	1	1	1	1	1	1	1	1	1	1	1	1	1	1	1	1	1	1	1	1+	1	1	1	6	1	1	1	1	1	1	1	1	1	1	1	1	5	1	1	1	1	1	1	1	1	1	1	1	1	1	1	1	1	1	1	1	1	1	1	1	1	1	1	1	1	1	1	1	1	1	1	1	1	1	1	1	1	1	1	1	1	1	1	1	1	1	1	1	1	1	6	1	1	1	1	1	1	1	1	1	1	1	1	1	1	1	1	1	1	1	1	1	1	1	1	1	1	6	1	1	1	1	1	1	1	1	1	1	1	1	1	1	1	1	1	1	1	1	1	1	1	1	1	1	6	1	1	1	1	1	1	1	1	1	N	1	1	1	1	1	6	1	1	1	1	1	1	1	1	1	1	1	N	N	1	1	1	1	1	1	1	1	1	1	1	1	1	1	1	1	1	1	1	6	1	1	1	1	1	1	1	1	1	1	1	1	1	1	1	1	1	1	1	1	1	1	1	1	1	1	1	1	1	1	1	1	1	1	1	1	1	1	1	1	1	1	1	1	1	1	1	1	6	1	1	1	N	1	1	1	1	1	1	1	1	1	1	1	1	1	1	1	1	1	1	1	1	1	1	1	1	1	1	1	1	1	1	1	1	1	1	1	1	1	1	1	1	1	1	1	1	1	1	1	1	1	1	1	1	1	1	1	1	1	1	1	1	1	1	1	1	1	1	1	1	1	1	1	1	1	1	1	1	1	6	1	1	1	1	1	1	1	1	1	1	1	1	1	1	1	1	1	1	1	1	1	1	1	1	1	1	6	1	1	1	1	1	1	1	1	4	48	1	1	1	1	1	1	1	1	1	1	1	1	1	1	1	1	1	1	1	1	1	6	1	1	1	1	1	1	1	1	1	1	1	1	1	1	1	1	1	N	1	1	1	1	1	1	1	1	1	1	47	1	1	1	1	1	1	1	1	1	69	1	1	1	1	1	1	1	1	1	1	1	1	3	1	1	1	1	1	1	1	1	3	1	1	1	1	1	1	1	1	1	1	1	1	1	1	1	1	1	1	1	1	1	1	1	1	1	1	1	1	1	1	1	1	1	1	1	1	1	1	1	1	1	1	1	1	1	1	1	1	1	1	1	1	1	1	1	1	1	1	1	1	1	3	1	1	1	1	1	1	1	1	1	1	1	1	1	1	1	1	6	1	1	1	1	1	1	6	6	6	6	6	6	9	2	6	1	2	5	1	1	1	6	6	6	3	6	6	6	6	6	6	6	6	6	6	71	1	5	6	1	6	6	6	5	6	6	6	6	6	6	6	6	6	6	6	6	6	6	6	6	6	6	6	6	6	6	6	6	6	N	6	6	6	6	6	6	6	6	6	6	3	3	3	3	66	3	3	3	3	3	6	3	3	3	3	6	3	6	6	12	6	6	4	6	6	6	6	6	6	6	5	5	6	6	6	13	6	6	6	5	1	6	6	6	6	3	5	6	6	6	6	6	4	6	6	6	4	5	6	6	6	5	3	6	5	6	6	6	6	6	6	6	15	6	6	6	6	6	6	6	6	6	6	160+	6	6	2	1	6	6	6	3	3	6	6	6	6	6	6	6	5	5	5	5	13	6	6	6	6	6	6	6	6	6	5	5	5	4	6	6	5	6	5	2	5	6	N	6	2	6	6	6	6	6	6	6	6	6	3	6	13	6	6	6	6	6	6	6	6	6	4	5	5	6	6	5	5	6	6	6	13	6+	0	0
GCA_000189655.2_ASM18965v2_genomic.fna	4	60	6	6	6	1	2	1	6	6	2	6	3	3	6	6	6	6	12	6	1	5	6+	6	3	6	6	5	5	35	2	5	6	23	5	5	6	6	6	6	5	6	6	6	50	6	6	6	3	34	6	6	5	32	35	45	41	43	1	46	40	167	28	44	43	69	43	79	64	47	40	42	66	36	36	5	23	60	38	32	42	6	6	6	56	63	21	52	6	6	6	16	13	8	13	12	15	18	5	13	15	14	12	11	13	17	16	16	17	15	16	13	3	5	1	1	6	31	12	41	19	39	28	37	43	6	6	6	6	6	5	6	6	N	6	6	4	6	6	6	6	5	5	5	6	6	5	42	5	6	6	6	6	6	5	6	1	1	1	1	46	1	1	1	1	6	6	5	5	5	6	4	1	1	1	6	1	1	1	1	1	1	1	1	1	1	1	1	1	1	1	1	1	1	1	6	4	1	1	1	1	1	1	1	1	1	1	1	1	1	66	1	1	1	1	1	1	1	1	1	1	1	1	1	1	1	1	1	6	1	1	1	1	1	1	1	1	1	1	1	1	1	1	1	1	1	1	1	1	1	1	1	1	1	1	1	1	1	1	1	1	1	1	1	1	1	1	1	1	1	1	1	1	1	1	54	1	1	1	1	1	1	1	1	1	1	1	1	1	1	1	1	1	1	1	1	1	1	1	1	1	1	54	1	1	1	1	1	1	1	1	1	1	1	1	1	1	1	1	1	1	1	1	1	1	1	1	1	1	1	1	1	1	1	1	1	1	1	1-	1	1	1	1	1	1	1	1	1	1	1	1	1	1	1	1	1	1	1	1	1	1	1	1	1	1	1	1	1	1	1	1	1	1	1	1	1	1	1	1	1	1	1	1	1	1	1	1	1	1	1	1	1	1	1	1	6	1	1	1	1	1	1	1	1	1	1	1	1	1	1	1	1	1	1	1	1	1	6	13	1	1	1	1	1	1	1	1	1	1	1	1	1	1	1	1	1	1	1	1	1	1	1	1	1	1	1	1	1	1	1	1	1	1	1	1	1	1	1	1	1	1	1	1	1	1	1	1	1	1	1	1	1	1	1	1	1	1	1	1	1	1	1	1	6	1	1	1	1	1	1	1	1	1	1	1	1	1	1	1	1	1	1	1	1	1	1	1	1	1	1	1	1	1	1	1	1	1	1	1	1	1	1	1	1	1	1	1	1	6	1	1	1	1	1	1	1	1	1	1	3	1	1	1	1	1	1	1	1	1	1	1	1	1	1	1	1	6	1	1	1	1	1	1	1	1	1	1	1	1	1	1	1	1	1	1	1	1	1	1	6	1	1	1	1	1	1	1	1	6	1	1	1	6	1	1	1	1	1	1	1	1	1	1	1	1	1	1	1	1	1	1	1	1	1	1	1	1	1	1	1	1	1	1	1	1	1	1	1	1	1	1	1	1	1	1	1	1	1	1	1	1	1	1	1	1	1	6	1	1	4	4	4	4	6	4	6	6	6	4	4	4	4	4	6	4	4	4	3	4	4	4	4	4	6	3	4	4	4	4	4	4	4	57	1	1	1	1	1	1	1	1	1	1	1	1	1	6	1	6	1	1	1	1	1	1	1	1	1	1	1	1	1	1	1	1	1	1	1	1	1	1	1	1	1	1	1	1	1	1	1	1	1	1	1	1	1	1	1	1	1	1	1	1	1	1	1	1	1	1	6	1	1	1	1	1	1	1	1	1	1	1	1	1	1	49	1	1	1	1	1	1	1	1	1	1	1	1	1	1	1	1	1	1	1	1	1	1	1	1	1	1	1	6	1	1	1	1	1	1	1	1	1	1	1	1	1	1	1	1	1	1	1	1	24	N	1	1	1	1	1	1	1	1	33	1	1	1	1	1	1	1	1	1	1	1	1	1	1	1	1	1	1	1	1	1	1	1	1	1	1	1	1	1	1	1	1	1	1	1	1	1	1	1	1	1	1	1	1	1	1	1	6	1	1	1	1	1	1	1	1	1	1	6	1	1	1	1	1	1	1	1	1	1	1	1	44	1	1	1	1	1	1	1	1	1	1	1	1	1	1	1	1	1	1	1	1	1	1	1	1	1	1	1	1	39	1	1	1	1	1	1	1	1	1	1	1	44	1	1	1	1	1	1	1	1	1	1	1	1	1	1	1	1	1	1	1	1	1	1	1	1	6	1	1	1	1	1	1	1	1	1	1	1	6	1	1	1	1	1	1	1	1	1	1	1	1	1	1	1	1	1	1	1	1	1	1	1	1	1	1	1	1	1	1	1	1	1	1	1	1	1	1	1	1	1	1	1	1	1	1	1	1	1	1	1	1	1	1	1	1	1	1	1	1	1	1	1	1	1	1	1	1	1	1	1	1	N	1	1	1	1	1	1	1	1	1	1	1	1	1	1	1	1	1	1	1	1	1	1	1	1	1	1	1	1	5	1	1	1	1	1	1	1	1	N	1	1	1	1	1	1	1	8	1	1	1	1	1	1	1	1	1	1	1	1	1	6	1	1	1	1	1	1	1	1	1	1	1	1	1	N	1	1	1	1	1	1	1	1	1	1	1	44	1	1	1	1	1	1	1	1	1	1	1	1	1	1	1	1	39	1	1	1	1	1	1	1	1	1	1	1	1	1	1	1	6	438+	6	1	1	1	1	1	1	1	1	1	1	1	1	1	1	1	1	1	1	1	1	1	1	1	1	1	1	1	1	1	1	1	1	1	1	1	1	1	1	1	52	1	1	1	1	1	1	1	1	1	1	1	1	1	6	1	1	1	1	1	1	1	1	1	1	1	1	1	1	1	1	1	1	1	41	46	1	1	1	1	1	1	1	1	1	1	1	1	1	1	1	1	1	1	1	1	1	6	1	1	1	1	1	1	1	1	1	1	1	1	1	1	1	1	1	1	1	1	1	1	1	1	1	1	1	1	1	1	1	1	6	1	1	1	1	1	1	1	1	1	1	1	1	1	1	1	1	1	1	1	1	1	1	1	1	1	1	1	1	1	1	1	1	1	1	1	1	1	1	1	1	1	1	1	1	6	1	1	1	1	6	1	1	1	1	1	37	1	1	1	1	1	1	1	1	6	1	1	1	1	1	1	1	1	6	1	1	1	1	1	1	1	1	1	1	1	1	1	1	1	57	1	1	1	1	1	1	1	1	1	1	1	1	1	1	1	1	6	1	1	1	1	1	6	1	1	1	1	1	1	1	1	1	1	1	1	1	1	1	1	46	1	1	1	1	1	1	1	1	1	1	1	1	1	1	6	1	1	1	1	1	1	1	1	1	1	1	1	1	1	6	1	1	1	1	1	1	1	1	1	1	1	1	1	1	1	1	1	1	1	1	1	1	1	1	1	1	1	1	1	0?	1	1	1	1	1+	1	1	1	1	1	1	1	1	6	1	1	1	1	1	1	1	1	1	1	1	1	1	N	1	1	1	1	1	1	1	1	1	1	1	1	1	1	1	1	1	1	1	1	27	1	1	1	1	1	1	1	1	6	1	1	1	N	1	6	1	1	1	1	1	1	1	1	1	1	1	1	1	1	1	1	1	1	1	1	1	1	1	1	1	6	5	5	5	6	5	5	5	5	5	6	5	4	5	5	1	6	6	1	1	6	6	5	5	5	1	1	1	1	1	1	1	1	1	1	1	1	1	1	1	1	1	1	1	1	1	1	1	1	1	1	1	1	1	1	1	1	1	1	1	1	1	1	1	1	1	1+	1	1	1	6	1	1	1	1	1	1	1	1	1	1	1	1	5	1	1	32	1	1	1	1	1	1	1	1	1	1	1	1	1	1	1	1	1	1	1	1	1	1	1	1	1	1	1	1	1	1	1	1	1	1	1	1	1	1	1	1	1	1	1	1	1	1	1	1	1	1	6	1	1	1	1	1	1	1	1	1	1	1	1	1	1	1	1	1	1	1	1	1	1	1	1	1	1	6	1	1	1	1	1	1	1	1	1	1	1	1	1	1	1	1	1	1	1	1	1	39	1	1	1	1	6	1	1	1	1	1	1	1	1	1	1	1	1	1	1	1	6	1	1	1	1	1	1	1	1	1	1	1	6	1	6	1	1	1	1	1	1	1	1	1	1	1	1	1	1	1	1	1	1	6	1	1	1	1	1	1	1	1	1	1	1	1	1	1	1	1	1	1	1	1	1	1	1	1	1	1	1	1	1	1	1	1	1	1	1	1	1	1	1	1	1	1	1	1	1	1	1	1	6	1	1	1	1	1	1	1	1	1	1	1	1	1	1	1	1	1	1	1	1	1	1	1	1	1	1	1	1	1	1	1	1	1	1	1	1	1	1	1	1	1	1	1	1	1	1	1	1	1	1	1	1	1	1	1	1	1	1	1	1	1	1	1	1	1	1	1	1	1	1	1	1	1	1	1	1	1	1	1	1	1	6	1	1	1	1	1	1	1	1	1	1	1	1	1	1	1	1	1	1	1	1	1	1	1	1	1	1	6	1	1	1	33	1	1	1	1	4	1	1	1	1	1	1	1	1	1	1	1	1	1	1	1	1	1	1	1	1	1	1	6	1	1	1	1	1	1	1	1	1	1	1	1	1	1	1	1	1	1	1	1	1	1	1	1	1	1	1	1	1	1	1	1	1	1	1	1	1	1	1	1	1	1	1	1	1	1	1	1	1	1	1	3	1	1	1	1	1	1	1	1	3	1	1	1	1	1	1	1	1	1	1	1	1	1	1	1	1	1	1	1	1	1	1	1	1	1	1	1	1	1	1	1	1	1	1	1	1	1	1	1	1	1	1	1	1	1	1	1	1	1	1	1	1	1	1	1	1	1	1	1	1	1	3	1	1	1	1	1	1	1	1	1	1	1	1	1	1	1	32	6	1	1	1	1	1	1	6	6	6	6	6	6	9	2	6	1	2	5	1	1	1	6	6	6	3	6	6	6	6	6	6	6	6	6	6	61	1	5	6	1	6	6	6	5	6	6	6	6	6	6	6	6	6	6	6	6	6	6	6	6	6	6	6	39	17	9	16	37	6	6	6	16	6	6	6	6	6	6	6	16	3	3	3	3	3	3	3	3	3	3	6	3	3	3	3	3	43	6	6	12	6	32	4	6	6	6	6	6	54	6	5	5	6	6	35	13	6	6	34	5	1	6	6	2	34	14	41	12	37	17	17	16	3	44	6	6	4	5	6	6	6	5	3	6	5	6	6	6	6	6	6	6	6	6	6	6	6	6	6	6	6	6	46	56	6	6	2	1	6	6	6	3	3	6	6	6	6	6	6	6	5	46	3	3	3	39	3	3	3	3	3	31	41	17	3	3	3	3	3	3	2	35	3	2	3	3	3	3	1	3	3	3	34	71	30	34	3	38	1	45	60	30	54	36	38	38	3	3	40	6	4	5	5	6	6	5	5	6	39	6	13	6-	0	0
GCA_000189675.2_ASM18967v2_genomic.fna	1	1	1	1	1	1	1	1	1	1	1	1	1	1	1	1	1	1	1	1	1	1	1	1	1	1	1	1	1	1	1	1	1	1	1	1	1	1	1	1	1	1	1	1	1	1	1	1	1	1	1	1	1	1	1	1	1	1	1	1	1	1	1	1	1	1	1	1	1	1	1	1	1	1	1	1	1	1	1	1	1	1	1	1	1	1	1	1	1	1	1	1	1	1	1	1	1	1	1	1	1	1	1	1	1	1	1	1	1	1	1	1	1	1	1	1	1	1	1	1	1	1	1	1	1	1	1	1	1	1	1	1	1	10	1	1	1	1	1	1	1	1	1	1	1	1	1	1	1	1	1	1	N	1	1	1	1	1	1	1	1	1	1	1	1	1	1	1	1	1	1	1	1	1	1	1	1	1	1	1	1	1	1	1	1	1	1	1	1	1	1	1	1	1	1	6	1	1	1	1	1	1	1	1	1	1	1	1	1	1	66	1	1	1	1	1	1	1	1	1	1	1	1	1	1	1	1	1	1	1	1	1	1	1	1	1	1	1	1	1	1	1	1	1	1	1	1	1	1	1	1	1	1	1	1	1	1	1	1	1	1	1	1	1	1	1	1	1	1	1	1	1	1	1	1	6	1	1	1	1	1	1	1	1	1	1	1	1	1	N	1	1	1	1	1	1	1	1	1	1	1	1	1	1	1	1	1	1	1	1	1	1	1	1	1	1	1	1	1	1	1	1	1	1	1	1	1	1	1	1	1	1	1	1	1	1	1	1	1	1	1	1	1	1	1	1	1	1	1	1	1	1	1	1	1	1	1	1	1	1	1	1	1	1	1	1	1	1	1	1	1	28	1	1	1	1	1	1	1	1	1	1	1	1	1	1	1	1	1	1	1	1	1	1	1	N	1	1	1	1	1	1	1	1	1	1	1	1	1	1	1	1	1	N	1	1	1	1	1	1	1	1	1	1	N	1	1	1	1	1	1	1	1	1	1	1	1	N	1	1	1	1	1	1	1	1	1	1	1	1	1	1	1	1	1	1	1	1	1	1	1	1	1	1	1	1	1	1	1	1	1	1	1	1	1	1	1	1	1	1	1	1	1	1	1	1	1	1	1	N	1	1	1	1	1	1	1	1	1	1	1	1	1	1	1	1	1	1	N	1	1	1	1	1	1	1	1	1	1	1	1	1	1	1	1	1	1	1	1	1	1	1	1	1	1	1	1	1	1	3	1	1	1	1	1	1	1	1	1	1	1	1	1	1	1	1	1	1	1	1	1	1	1	1	1	1	1	1	1	1	1	1	1	1	1	1	1	1	1	1	1	1	1	1	1	1	1	1	1	1	1	1	1	1	1	1	1	1	1	1	1	1	1	1	1	1	1	1	1	1	1	1	1	1	1	1	1	1	1	1	1	1	1	1	1	1	1	1	1	1	1	1	1	1	1	1	1	1	1	1	1	1	1	1	1	1	1	1	1	1	1	1	1	1	1	1	1	1	1	1	1	1	1	1	1	1	1	1	1	1	1	1	1	1	1	1	1	1	1	1	1	1	1	1	1	1	1	1	1	1	1	1	1	1	1	1	6	1	1	1	1	1	1	1	1	1	1	1	1	1	1	1	1	1	1	1	1	1	1	110-	1	1	1	1	1	1	1	1	1	1	1	1	1	1	1	1	1	1	1	1	1	1	1	1	1	1	1	1	1	1	1	1	1	1	1	1	1	1	1	1	1	1	1	1	1	1	1	1	1	1	1	1	1	1	1	1	1	1	1	1	1	1	1	1	1	1	1	1	1	1	1	1	1	1	1	1	1	1	1	1	1	1	1	1	1	1	1	1	1	1	1	1	1	1	1	1	1	1	1	1	1	1	1	1	1	1	1	1	1	1	1	1	1	1	1	1	1	1	1	1	1	1	1	1	1	1	1	1	1	1	1	1	1	1	1	1	1-	1	1	1	1	1	1	1	1	1	1	1	1	1	1	1	1	1	1	1	1	1	1	1	1	1	1	1	1	1	1	1	1	1	1	1	1	1	1	1	1	1	1	1	1	1	1	1	1	1	1	1	1	1	1	1	1	1	1	1	1	1	1	1	1	1	1-	1	1	1	1	1	1	1	1	1	1	1	1	1	1	1	1	1	1	1	1	1	1	1	1	1	1	1	1	1	1	1	1	1	1	1	1	1	1	1	1	1	1	1	1	1	1	1	1	1	1	1	1	1	1	1	1	1	1	1	1	1	1	1	1	1	1	1	1	1	1	1	1	1	1	1	1	1	1	1	1	1	1	1	1	1	1	1	1	1	1	1	1	1	1	1	1	1	1	1	1	1	1	1	1	1	1	1	1	1	1	1	1	1	1	1	1	1	1	1	1	1	1	1	6	1	1	1	1	1	1	1	1	1	1	1	1	1	1	1	1	1	1	1	1	1	1	1	1	1	1	1	1	1	1	1	1	1	1	1	1	1	1	1	1	1	1	1	1	1	1	1	1	1	1	1	1	1	1	1	1	1	1	1	6	1	1	1	1	1	1	1	1	1	1	1	1	1	1	1	1	1	1	1	1	1	1	1	1	1	1	1	1	1	1	1	1	1	1	1	1	1	1	1	1	1	1	1	1	1	1	1	1	1	1	1	1	1	1	1	1	1	1	1	438+	1	1	1	1	1	1	1	1	1	1	1	1	1	1	1	1	1	1	1	1	1	1	1	1	1	1	1	1	1	1	1	1	1	1	1	1	1	1	1	1	1	1	1	1	1	1	1	1	1	1	1	1	1	1	1	1	1	1	1	1	1	1	1	1	1	1	1	1	1	1	1	1	1	1	1	1	1	N	1	1	N	1	1	1	1	1	1	1	1	1	1	1	1	1	1	1	1	1	1	1	1	1	1	1	1	1	1	1	1	1	1	1	1	1	1	1	1	1	1	1	1	1	1	1	1	1	1	1	1	1	1	1	1	1	1	1	1	1	1	1	30	1	1	1	1	1	1	1	1	1	1	1	1	1	1	1	1	1	1	1	1	1	1	1	1	1	1	1	1	1	1	1	1	1	1	6	1	1	N	1	1	1	1	1	1	1	1	1	1	1	1	1	1	1	1	6	1	1	1	1	1	1	1	1	1	1	1	1	1	1	1	1	1	1	1	1	1	1	1	1	1	1	1	1	1	1	1	1	1	1	1	1	1	1	1	1	1	1	1	1	1	1	1	1	1	1	1	1	1	1	1	1	1	1	1	1	1	1	1	1	1	1	1	1	1	1	1	1	1	1	1	1	1	1	1	1	1	1	1	1	1	1	1	1	1	1	1	N	1	1	1	1	1	1	1	1	1	1	1	1	1	1	1	1	1	1	1	1	1	1	1	1	1	1	1	1	1	1	1	1	1	1	1	1	1	1+	1	1	1	1	1	1	1	1	1	1	1	1	1	1	1	1	1	1	1	1	1	1	1	1	1	1	1	1	1	1	1	1	1	1	1	1	1	1	1	1	1	1	1	1	1	1	1	1	1	1	1	1	1	1	1	1	1	1	1	1	1	1	1	1	1	1	1	1	1	1	N	1	1	1	1	1	1	1	1	1	1	1	1	1	1	1	1	1	1	1	1	1	1	1	1	1	1	1	1	1	1	6	1	1	1	1	N	1	1	1	N	1	1	1	1	1	1	1	28	1	1	1	1	1	1	1	1	1	1	1	1	1	1	1	1	1	1	1	1	1	1	1	1	1	1	1	1	1	1	93-	1+	1	1	1	1	1	1	1	1	1	1	1	1	1	1	1	1	1	1	1	1	1	1	1	1	1	1	1	1	1	1	1	1	1	1	1	1	1	1	1	1	1	1	1	1	1	1	1	1	1	1	1	1	1	1	1	1	1	1	1	1	1	1	1	1	1	1	1	1	1	1	1	1	1	1	1	1	1	1	1	1	1	1	1	1	1	1	1	1	1	1	1	1	1	1	1	1	1	1	1	1	1	1	1	1	1	1	1	1	1	1	1	1	1	1	1	1	1	1	1	1	1	1	1	1	1	1	1	1	1	1	1	1	1	1	N	1	1	1	1	1	6	1	1	1	1	1	1	1	1	1	1	1	1	N	1	1	1	1	1	1	1	1	1	1	1	1	1	1	1	1	1	1	1	1	1	1	1	1	1	1	1	1	N	1	1	1	1	1	1	1	1	1	1	1	1	1	1	1	1	1	1	1	1	1	1	1	1	1	1	1	1	1	1	1	1	1	1	1	1	1	1	1	1	1	1	1	1	1	1	1	1	209-	1	1	1	1	1	1	1	1	1	1	1	1	1	1	1	1	1	1	1	1	N	1	1	1	1	1	1	1	1	1	1	1	1	1	1	1	1	1	1	1	1	1	1	1	1	1	1	1	1	1	1	1	1	1	1	1	1	1	1	1	1	1	1	1	1	1	1	1	1	1	1	1	1	1	1	1	1	1	1	1	1	1	1	1	1	1	1	1	1	1	1	1	1	1	1	1	1	1	1	1	1	1	1	1	1	1	1	1	1	1	1	1	1	1	1	1	1	1	1	1	1	1	1-	1	1	1	1	1	1	1	1	1	1	1	1	1	1	68-	1	1	1	1	1	1	1	1	1	1	1	1	1	1	1	1	1	1	1	1	1	1	1	1	1	1	1	1	1	1	1	1	1	1	1	1	1	1	1	1	1	1	45	1	1	1	1	1	1	1	1	1	1	1	1	1	1	1	1	1	1	1	1	1	1	1	1	1	1	1	1	1	1	1	1	1	1	N	1	1	1	1	1	1	1	1	1	1	1	1	1	1	1	1	1	1	1	1	1	1	1	1	1	1	1	1	1	1	1	1	1	1	1	N	1	1	1	1	1	1	1	1	1	1	1	1	1	1	1	1	1	1	1	1	1	1	1	1	1	1	1	1	1	1	1	1	1	1	N	1	1	1	1	1	1	1	1	1	1	1	1	1	1	1	1	1	1	1	1	1	1	1	1	1	1	1	1	1	1	1	1	1	1	1	1	1	1	1	1	1	1	1	1	1	1	1	1	1	1	1	1	1	1	1	1	1	1	1	1	1	1	1	1	1	1	1	1	1	1	1	1	1	1	1	1	1	1	1	1	1	1	1	1	1	N	1	1	1	1	1	1	1	1	1	1	1	1	1	1	14	1	1	1	1	1	1	1	1	1	1	1	1	1	1	1	1	1	1	1	1	1-	N	1	1	1	1	1	1	N	1	1	1	1	1	1	1	1	1	1	1	1	1	1	1	1	1	33	1	1	1	1	1	1	1	1	1	1	1	1	1	1	1	1	1	1	1	1	1	1	1	1	1	1	1	1	1	1	13	1	1	1	1	1	30	1	1	1	1	1	1	1	1	1	1	1	1	1	1	1	1	1	1	1	1	1	1	1	1	1	1	1	1	1	1	1	1	1	1	1	1	1	1	1	1	1	1	0	0
GCA_000189695.2_ASM18969v2_genomic.fna	5	7	7	7	7	1	3	1	7	7	3	N	5	6	7	N	7	7	7	0?	6	2	N	7	2	7	7	2	6	7	2	6	7	7	7	5	8	8	8	8	7	8	8	N	8	1	8	8	2	8	8	8	N	8	8	8	N	8	1	8	7	7	N	8	7	8	36	8	8	7	7	7-	7	7	7	7	8	7	7	7	7	7	7	7	7	7	7	7	7	7	7	7	6	7	6	7	7	7	7	6	7	6	2	6	6	7	7	7	6	7	N	7	4	5	1	1	1	6	N	7	1	1	7	7	6	7	8	7	7	34	6	2	7	13-	7	7	17	7	7	8	37	6	6	6	7	21	6	7	2	7	7	53	7	7	6	7	3	3	7	6	7	6	7	3	6	7	7	6	6	6	28	5	6	7	7	7	1	21	6	6	6	7	1	6	6	6-	6	6	6	5	6	6	6	6	6	7	5	3	5	6	6	5	6	6	2	3	1	4	4	1	7	7	18	1	2	7	6	6	7	6	6	5	4	6	6	5	6	6	7	6	6	22	6	6	6	7	7	7	5	7	31	7	6	7	7	7	6	6	5	3	7	1	6	3	6	6	7	6	6	7	6	6	6	6	7-	6	6	7	1	6	6	7	6	6	7	8	6-	7	5	5	7	6	3	6	5	6	6	7	1	6	6	6	6	6	6	6	6	7	3	6	6	6	6	6	6	6	N	7-	6	6	6	6	1	6	6	3	6	2	6	1	6	6	6	6	N	6	7	6	7	6	5	6	1	30	6	3	6	N	6	7	2	6	3	2	6	1	1	6	6	6	6	1	6	6	6	6	6	6	6	6	5	1	5	N	6	5	6	6	6	6	6	6	6	6	6	6	6	6	6	5	6	6	6	6	6	6	6	6	1	5	6	5	6	6	3	7	2	2	3	30	6	6	6	6	6	6	6	6	6	6	6	6	6	6	N	6	7	7	7	6	6	6	6	2	7	6	1	6	2	6	6	6	5	6	6	6	6	6	6	6	6	5	1	6	6	6	1	6	6	6	1	1	N	6	N	3	N	4	6	6	5	6	6	6	2	6	1	7	4	7	7	6	4	1	6	6	6	6	6	7	6	7	7	8	7	6	7	7	7	7	5	7	7	8	7	0?	0?	0?	0?	0?	0?	0?	0?	0?	6	6	6	6	6	1	6	1	6	6	5	6	1	3	7	5	5	6	6	5	6	4	6	6	7	3	3	6	6	1	6	4	6	6	6	N	6	6	6	6	6	6	3	6	6	6	N	6-	6	6	6	6	7	6	4	6	6	6	6	6	7	6	6	3	1	7	6	2	1	6	6	1	5	6	6	7	N	6	5	5	1	1	6	4	7	6	6	6	7	6	6	2	3	6	6	7	7	6	6	6	6	6	5	6	11	1	1	6	6	6	N	6	6	7	6	4	3	2	6	6	6-	3	6	5	6	7	5	6	7	6	1	1	18	6	N	7	N	6	7	6	6	7	7	N	6	6	6-	6	6	7	5	28	7	7	6	6	6	6	6	7	7	6	6	4	6	6	6	5	6	N	4	6	6	6	6-	6	7	6	7	N	5	7	6	5	6	38	6	7	6	6	7	6	8	6	8	6	6	6	6	6	6	6	7	6	6	6	5	6	1	6	6	7	6	6	6	6	7	6	6	6-	6	2	6	4	6	6	6	8	7	6	7	7	7	7	7	7	7	7	6	6	6	6	5	6	6	7	2	4	6	6	6	5	0?	1	6	7	6	6	6	6	6	6	6	6	6	6	6	7	2	6	6	6	6	6	1	6	6	N	6	6	N	6	N	4	6	6	6	5	7	5	5	6	6	6	6	6	N	2	2	6	4	4	N	6	6	6-	6	6	6	5	7	6	6	5	5	5	5	6	4	4	5	N	6	N	N	3	6	6	6-	28	6	6	6	6	N	7	6	6	6	6	4	5	7	7	5	6	172-	5	5	6	5	6	6	6	6	6	7	6	6-	6	6	6	6	6	6	7	7	7	6	6	6	7	6	6	6	6	6	6	7	18	6	6	6	6	6	6	6	6	6	6	6	6	18	6	6	6	11	5	6	5	6	7	6	6	2	6	6	5	6	7	6	3	6	7	N	6	17	7	6	6	N	5	6	6	6	6	6	7	6	6	6	6	7	7	6	6	7	34	3	5	6	6	6	6	6	6	17	6	6	6	6	6	1	3	6	6	6	7	7	6	6	7	6	5	6	6	6	7	6	7	5	5	6	6	5	5	6	6	6	6	5	6	30	6	6	3	6	15	5	6	6	6	7	5	4	6	21	6	6-	5	6	6	6	6	6	1	N	7	37	6	7	8	1	7	4	7	1	8	2	7	7	6	7	1	4	7	0?	N	7	7	6	7	7	5	7	7	7	6	5	7	7	7	8	7	N	7	6	7	7	5	7	7	7	7	7	5	5	7	7	7	7	6	7	7-	1	7	7	7	N	2	7	6	6	7	6	4	1	7	2	6	15	2-	N	6	7	7	7	7	8	7	7	7	7	30	7	6	5	7	7	6	7	6	7	7	6	8	6	6	6	6	6	4	3	29	2	3	3	6	8	6	5	7	7	6	6	5	13	7	6	7	7	7	7	6	1	7	7	7	7	7	7	7	7	7	7	7	7	7	7	7	7	7	6	6	7	6	7	7	6	3	2	7	6	7	6	6	N	6	5	6-	6	30	6	6	6	6	6	7	5	7	6	6	6	6	5-	6	N	6	6	6	6	4	6	6	6	6	7	5	6	6	6	6	7	6	6	6	6	6	6	6	6	6	6	38	6	6	7-	7	6	6	6	6	6	6	6	7	6	6	6	6	6	6	6	6	6	4	7	6	6	1	6	6	6	6	6	6	N	6	6	6	1	6	40	N	6	5	7	4	6	6-	7	6	5	6	6	6	30	6	6	5	N	2	6	6	3	3	2	3	3	3	2	1	5	6	6	1	6	7	6	6	N	1	6	7	7	4	4	6	1	6-	6	6	7	7	N	6	6	2	N	6	N	6	5	4	3	6	6	6	6	5	6	6	6	6	6	5	6	6	6	6	1	6	N	4	6	6	7	5	8	6	6	6	5	7	7	6	4	6	6	6-	6	1	6	6	6	6	7	6	7	7	6	6	4	33	6	6	6	0?	6	6	6	6	6	N	7	2	N	6	6	5	5	1	30	6	6	5-	N	2	1	6	5	5	6	6	6	6-	3	N	7	5	7	6	6	6	N	6	7	6	6	6	5	6	3	2	6	6-	1	5	4	6	6	6	1	6	1	36	6	4	6	7	7-	6	6	6	6	6	6	6	7	7-	6	0?	6	6	6	6	6	6	6	0?	0?	6	6	7	5	1	6	6	4	4	1	3	6	6	7	6	6	6	6	43	5	7	6	1	6	6	6	6	6	N	1	6-	0?	6	6	6	6	6	6	3	5	6	N	6	1	6	5	7	6	6	N	6	6	1	1	7	7	6	6	6	6	N	6	4	5	6	1	1	6	2	3	5	5	1	6	6	7	6	6	3	6	6	N	6	1	6	29	5	6	6	3	7-	6	6	6	7	6	7	N	6	6-	44	6	6	6	6	6	6	6	N	5	5	4	6	4	6	4	3	6	7	6	6	6	7	6	6	6	7	6	6	6	6	6	7	4	1	6	6	6	8	7	7	6	7-	7	6	6	6	5	6	N	19	6	6	6	6	6	6	6	7	6	6-	6	6	6	6	6	7	7	6	7	3	6	6	1	7	5	5	6	6	6	1	6	6	5	6	6	6	6	6	6	7	7	8	7	7	7	7	7	6	6	6	4	6	6	5	6	6	6	6	6	6	6	6	7	6	3	6	7	6	6	7	6	7	6	7	6	6	6	6	6	6	6	6	6	7	6	6	6	6	6	6	6	6	3	N	4	6	6	6	6	6	3	6	5	6	6	6	N	6	7	6	N	6	6	4	6	6	6	7	6	7	6	6	6	5	6	6	6	4	6	6	6	6	6	5	1	7	6	7	2	1	6	6	5	5	5	6	5	6	2	5	6	6	5	6	6	6	6	6-	5	6	6	6	7	7	6	6	6	6	6	4	6	6	6	6	6	5	6	6	7-	2	6	N	N	4	7	2	6	7	6	6	8	6	0?	6	1	6	6	6	0?	6	6	6	6	6	1	6	6	1	4	6	6	7	5	6	6	1	N	6	6	6	6	6	1	6	6	6	6	6-	2	2	6	6	6	6	1	6	4	6	1	6	6-	6	6	6	6	N	5	3	1	1	6	7	6	7	7	6	6	6	6	6	8	6	6	6	6	6	1	6	4	6	6	6	6	6	6	6	6	6	7	7	7	7	2	7	7	7	7	1	7	7	7	7	7	N	6	6	3	6	6	6	2	6	N	2	2	6	1	7-	6	6	6	N	1	3	6	6	7	6	4	6	6	6	6	5	6	N	6	7	6	4	6	6	6	5	6	2	1	N	6	6	5	18	7	6	5	6	6	6	6	7-	N	6	16	6	6	7	6	7	6	6	6	6	6	6	6	6	2	6	6	7	6	5	6	6	2	4	7	7	6	7	N	6	6	6	6	6	1	6	6	6	6	5	6	10	4	6	1	6	6	4	6	7	6	6	6	6	6	5	6	6	6	7	6	1	1	6	4	6	6	6	5	6	6	6	6	6	7	6	7	5	6	6	5	1	6	6	6	28	2	5	7	6	5	6	6	6	6	6	5	6	7	1	1	3	1	1	1	6	3	1	1	1	3	1	1	1	1	1	1	1	1	1	1	1	4	1	1	1	1	2	7	6	6	2	6	7	N	6	6	6	7	5	5	6	5	5	5	6	6	6	4-	6	6	6	6	6	6	6	6	6	6	6	6	5	N	6	7	6	7	6-	6	6	6	5	6	6	7	N	6	6	6	6	6	6	6	6	6	6	6	6-	7	7	6	3	6	1	1	6	34	4	7	7	7	7	7	3-	7	4	1	6	6	5	5	7	7	7	2	3	3	7	7	N	N	8	8	8	8	42	3	6	7	N	7	7	N	6	7	N	7	7	7	7	8	7	7	7	7	7	7	7	7	7	7	7	7	7	7	3	32	7	7	N	7	7	7	7	7	7	7	N	7	7	6	6	0?	6	6	7	6	6	6	6	7	6	6	6	6	7	7	7	7	7	7	7	6	7	7	7	7	3	41	7	1	6	7	7-	7	7	7	7	7	6	4	7	33	7	7	5	6	8	7	7	7	7	5	7	7	7	6-	6	7	8	7	6	1	7	6	7	8	7	7	377-	7	7	7	7	7	7	7	8	7	8	7	7	7	7	7	7	2	1	7	7	7	4	2	7	7	7	7	N	7	7	7	6	4	6-	7	7	7	7	7	6	7	7	N	7	6	5	5	4	7	7	6	0?	6-	2	6	6	33	2	3	8	7	7	7	7	7-	7	16	7	1	7	7	7	7	7	7	7	7	7	7	7	1	6	5	7	7	7	5	7	7	7	7	7	0	0
GCA_000189715.2_ASM18971v2_genomic.fna	2	1	1	1	N	1	1	1	1	50	1	1	1	1	N	2	2	2	N	17	2	2	2	2	2	N	2	2	2	2	2	2	2	2	2	2	2	N	2	2	2-	152	12	11	61	231	65	12	2	15	80	13	N	N	15	61	60	58	1	1	121	0?	220	48-	75	106	189	2	11-	2	200	81	341	199	2	2	2	2	2	2	2	2	2	2	2	2	N	57	2	2	2	2	2	2	2	2	2	2	2	2	12	2	2	2	2	2	2	N	4	2	2	2-	N	2	1	1	2	2	2	2	1	2	2	2	2	N	2	2	2	2	2	2	2	N	2	N	2	2	2	2	12	9	77	11	12-	12	11	11	8	11	201	N	2	2	N	2	2	2	2	2	2	2	2	2	2	2	165	N	2	2	2	2	2	2	2	2	2	2	2	194	2	2	2	2	2	2	N	2	2	2	2	2	2	2	2	2	1	1	1	2	1	2	2	2	1	1	1	2	2	1	2	2	N	2	2	2	N	15	2	16	2	2	2	39	15-	2	2	2	2	2-	2	2	53	2	2	2	2	2	2	2	2	2	2	2	2	2	2	16	8	2	2	14	2	2	2	2	2	2	15	2	2	2	2	2	2	2	33	2	1	2	2	2	2	2	272	2	2	2	2	2	2	2	2	2	2	14	2	2	7	N	2	2	2	2	2	2	2	2	1	2	2	2	2	2	2	15	2	2	N	182	2	2	2	15	2	2	2	2	2	1	2	N	2	2	2-	2	2	10	2	2	N	2	2	2	2	1	269	2	2-	2-	2	2	2	2	2	1	1	N	2	2	2	1	2	16	2	N	N	2	2	N	2	1	2	2	2	2	2	15	16	15	2	2	2	16	2	2	2	2	N	N	40	2	2	2	2	2	2	2	2	1	N	2	2	2	2	2	2	2	2	2	2	2	2	16	N	2	2	2	2	2	2	2	2	2	2	16	2	17	2	2	2	2	159	2	2	2	1	N	2	2	2	2	2-	2	2	2	2	2	2	2	2	2	1	2	16	2	2	2	2	2	1	1	2	2	2	2	2	2	2	2	N	2	2	2	2	2	2	2	2	2	2	2	2	1	2-	2	2	2	N	2	2	121	2	2	2	2	2	2	2	2	2	2	2	2	15	2	2	2	15	224	2	2	2	N	2	2	2	2	2	1	2	2	2	2-	2	2	1	2	2	2	2	2	2	2	2	2	2	2	2	2	2	15	2	2	16	2	2	2	2	2	2-	2	N	2	2	N	2	2	2	2	2	2	2	2	2	2	2	2	2	302-	2	190	30	2	2	2	2	2	2	2	2	1	1	2	2	1	2	2	2	2	0?	2	2	2	1	2	2	2	N	2	2	2	2	2	16	2	2	2	2	2	2	2	2	16	2	2	2	2	2	1	1	2	N	2	2	2	2	2	2	2	1	N	2	155	2	2	2	2	193	2	2-	2	2	2	2	2	2	2	2	N	N	2	2	2	2	2	2	2	2	2	2-	15	2	N	1	2	18-	2	2	2	0?	2	2	2	2-	2	2	2	180	2	2	2	2	2	N	2	2	2	2	2	196	2	16	2	2	2	2	1	2	2	2	2	2	2	209	16	2	2	2	2	2	2	2	2	2	2	2	2	2	143	2	2	2	2	2	2	2	2	2	2	N	2	2	2	2-	1	N	2	2	2	2	2	2	2	2	111-	2	2	2	2	2-	2	2	248	2	2	2	2	2	2	1	N	2	2	2	2	2	2	2	2	2	2	172	2	2	2	2-	2	2	N	N	2	2	15	2	2	2	37	1	2	2	1	2	2	2	2	174	2-	2	2	2	2	2	1	1	2	2	2	2	2	2	2	2	2	2	2	57	2	202	2-	2	2	2	2	273	2	2	2	2	2-	2	184	2	N	2	2	15	2	2	N	2	2	N	2	2	2	2	2	2	2	2	2	2	16	1	N	266	2	2	170	N	2-	N	2	2	2	2	N	2	2	2	2	16	2	2	2	2	2	2	2	2	2	2	N	2	2	2	2	2	16	2	2	17	2	2	2	2	2	2	2	15-	2	2	2	2	2	2	2	2	2	2	1	2-	2	2	N	2	118	2	2	N	2	2	16	2	N	2	2	N	2	2	2	2	2	0?	2	N	2	2	2	2	2	2	157	2	2	2	N	17	4	2-	0?	2	10	2	207-	N	2	2	15	2-	2	2-	2	N	179	2	2	16	2	2	2	2	N	2	161	2	2	2	2	2	2	2	2	2	2	2	121	2	2	2	2	2	0?	13	2	2-	N	2	2	N	2	2	2	2	2	2	1	1	2	183	108	2	2	15	2	2	2	49-	69-	N	2	2	2	2	2	2	2	2	N	1	2	2	2	2	2	2	2	2	N	2	2	2	2	2	2	2	2	2	2	2	0?	2	2	2	2	2	16	2	2	2	2	17	3	3	3	15-	16	33	N	11	15	2	2-	2	2	2	N	24	2	2	2	2-	2	2	2	2	2	2	2-	2	2	2	N	N	1	2-	231-	2	2	2	2	2	2	N	2	2	2	2	2	1	2	N	2	2	2	2	2	N	N	2	N	2	2	2	2	2+	103	2	2	2	2	2	2+	2	2	2	2	N	2	2	2	17	2	2	14	2	2	2	2	2	2	2	2	16	2	16	2	2	2	2	2	2	2	16-	2	2	16	2	2	2	207	2	2	2	2	2	2	2	2	2	2	2	2	2	2	2	2-	34	16+	2	2	2	2	2	2	2	2	2-	2	220	2	2	2	2	2	2	2	2	13	303	2	16	16	2	2	2	2	2	10	210	2	14	8	8	N	2	2	186	15	N	16	15	N	14	99-	34	2	2	N	N	2	2	2	2	16	2	2	2	2	2	2	2	2	2	2	2	2	200	2	2	2	2	2	2	2	2	2	2	2	2	2	2	N	N	2-	2	2	2	2	2	2	2	68-	2-	1	2	2	2	2	2	2	2-	1	58-	1	2	2	15	1	2	2	2	2	2	1	2	2	2	2	2	2	2	183	2	2-	0?	N	2	2	2	0?	2	2	2	2	2	2	2	2	1	2	2	2	1	2	2	2	2	2	2	2	165	2	1	N	2	2	2	2	2	2	17	2	2	N	2	2	2	2	N	2	2	N	2	1	2	2	N	2	2	2-	2	2	2	2	N	2	2	N	2	2-	2	2	2	2	2	2	2	2	2	2	2	2	2	2	2	2	2	2	2	2	68-	N	N	2	2	2	N	15	2	2	2	2	2	2	2	2	2	2	2-	2	2	2	2	2	2	2	16	2	2	1	1	2+	2	2	1	2	2	2	2	2	2	2	N	2	2	2	2	2	2	2	2	2	2	78-	2-	2	2	2	2	2+	2	2	2	2-	13	231	2	2	N	2	2	1	1	2	2	2	2	2-	0?	208-	2	N	2	2	2	1	2	2	2	2	15	2	2	2	201	2	2	2	2	2	N	2	2	2	N	2	2	2-	2	2	2	15	15	15	16	1	2	2	2	2	2	2	2	2	42	2	13	2	1	1	2	2	1	2	2	2-	15	2	N	2	2	2	125	2	2	16	1	2	2	2	2	2	1	16	2	2	2	2	2	16	2	2	2	N	2	2	2	2	2	2	2	2	2	2	2	N	N	2	2	2	2	62	2	2	2-	2	2	2	2	2	N	2	216	2	11-	15	10	7	128	14	15	8	7	7	6	7-	7	6	6	120	2-	2	3	2	2	0?	2	15	2-	2	2	2	208-	N	16	2	2	2-	257	2	2	2	2	2	2	2	2	2	2	2	2	150	2	2	2	2	2	2	2	2	2-	2	2	2	2	154	0?	2	N	150	100	50	29	12	N	28	69	16	135	36	167	28	2	2	15	2	2	N	2-	2	2	2	16	2	2	N	2	2	2	2	2	2	2	16	2	2	2	2	81	51	55	N	10-	2	2	2	68-	2	11	2	2-	2	N	2	1	2	2	2	2	2	2	2	2	2	N	2	2	2	2	2	2	2	2	2	2	5	2	2	2	30	2	2	2	2	2	16	2	2	1	2	2	2	2	68-	N	2	2	2	2	2	1	2	2	2	2	2	2	N	2	N	2	2	N	16	2	2	0?	4	2	2	2	2	2	1	2	2	2	2-	2	2	2	2	2	2	15	276	N	2	2	2	2	2	2	2	2	2-	2-	2-	1	2	2	2	0?	2	2	2	N	2	2	N	2-	2	2	2	2	2	2	2	2	2	N	0?	N	2	2	13	2	2	2	2	2	2	1	2	2	2	2	2	1	2	2	2	2	2-	2	2	2	2	2	1	1	1	1	2	2-	2	2	2	2	2	2	2-	2	2	2	2	2	15	186	N	N	2	2	2	79-	2-	N	2	2	2	2	2	2	47	2	2	1	2	2	2	N	2	2	15	2	2	2	2	2	2	2	2	2	222	2	2	2-	N	2	2	1	2	2	45	2	2	2	2	2	2	2	2	2	2	2	2	2	2	2	N	2	2	2	2	2	2	2	N	2	2	1	2	166	2	2	2	2	2	2	2	2	2	2	2	2	2	2	N	2	2	2	13	2	N	2	N	2	2	2	2	2	2	2	2	2	2-	2	2	2	7	14-	220	N	9	N	43	2	N	2	2	1	2	2	2	2	N	2	2	2	2	1	2-	2	2-	2	2	2	2	2	2	2	2-	2	2	2	2	2	1	1	2	2	2	2	2	2	N	2	N	2	2	2	2	2	2	2	2	2	N	2	2	2	2	N	2	N	2	1	2	9	2	196	2	2	2	2	1	2	2	1	1	1	8	2	1	1	1	2	N	1	26	1	1	24	1	1	2	1	1	12	1	2	1	1	2	2	N	2	2	2	2	182	2	2	2	N	1	1	N	2	1	2	2	2	2	6	N	2	2	2	2	2	2	2	2	2	N	2	2	2	2	176	2	2	2	2	55-	2	2	55	2	2	34	N	194	25	31	14	12	43	34	30	34	32	37	38	36	220	1	2	1	1	2	71-	1	1	1	1	1	1	1-	1	68	7	28	81-	27	49-	93	10	9	15	62	9	10	4	11	N	5	5	45	51	11	5	8	9	4	9	9	28	9	11	15	65	37	37	241	N	1	1	1-	1	1	1	1	1-	N	1	1	1	1-	1-	1	1	1-	1	1-	1	1	1	1	1	N	1	1	1	1	1	1	1	12	1	1-	1	1	1	1	1	1	1	1	1	N	1-	N	1	225	N	1	1-	1	232	1	1	1	1	1	1	1	1	N	1	179	1	1	1	1	1	N	1	1	1	1	1	1	1	1	1	1	1	1	1	1	N	133-	N	1	1	1	1	1	1	1	1	1	1	1	1	13-	1	1	1	13	1	1	1	1	1	1	1	1	1	1	1	1	1	1	1	1	1	1	1	1	1	1	N	1	1	1	N	1	1	1	1	1-	N	1	1	1	1	N	1	1	99	1	1	1	1	N	1	1	1	N	N	1	1	1	1	1	1	N	12	1	1	1	1	N	1	1	1	1	1	1	1	1	1	1	1	1-	1	1-	1	1	1	1	N	1	1	1	0	0
GCA_000189735.2_ASM18973v2_genomic.fna	4	60	6	6	6	1	2	1	6	6	2	6	3	3	6	6	6	6	12	6	1	5	6+	6	3	6	6	5	5	35	18	5	6	23	5	5	6	6	6	6	5	6	6	6	50	6	6	6	3	34	6	6	5	32	35	45	41	43	1	46	40	167	28	44	43	69	43	79	64	47	40	42	66	36	36	5	23	60	38	32	42	6	6	6	56	63	21	52	6	6	6	16	13	8	13	12	15	18	5	13	15	14	12	11	13	17	16	16	17	15	16	13	3	5	1	1	6	31	21	41	19	39	28	37	43	6	6	6	6	6	5	6	6	N	6	6	4	6	6	6	6	5	5	5	6	6	5	42	5	6	6	6	6	6	5	6	1	1	1	1	13	1	1	1	1	6	6	5	5	5	6	4	1	1	1	6	1	1	1	1	1	1	1	1	1	1	1	1	1	1	1	1	1	1	1	6	4	1	1	1	1	1	1	1	1	1	1	1	1	1	1	1	1	1	1	1	1	1	1	1	1	1	1	1	1	1	1	1	6	1	1	1	1	1	1	1	1	1	1	1	1	1	1	1	1	1	1	1	1	1	1	1	1	1	1	1	1	1	1	1	1	1	1	1	1	1	1	1	1	1	1	1	1	1	1	6	1	1	1	1	1	1	1	1	1	1	1	1	1	1	1	1	1	1	1	1	1	1	1	1	1	1	1	1	1	1	1	1	1	1	1	1	1	1	1	1	1	1	73	1	1	1	1	1	1	1	1	1	1	1	1	1	1	1	1	1	1	1	1	1	1	1	1	1	1	1	1	1	1	1	1	1	1	1	54	1	1	1	1	1	1	1	1	1	1	1	1	1	1	1	1	1	1	1	1	1	1	1	1	1	1	1	1	1	1	1	1	1	1	1	1	1	1	1	1	6	1	1	1	1	1	1	1	1	1	1	1	1	1	1	1	1	1	1	1	1	1	6	13	1	1	1	1	1	1	1	1	1	1	1	1	1	1	1	1	1	1	1	1	1	1	1	1	1	1	1	1	1	1	1	1	1	1	1	1	1	1	1	1	1	1	1	1	1	1	1	1	1	1	1	1	1	1	1	1	1	1	1	1	1	1	1	1	6	1	1	1	1	1	1	1	1	1	1	1	1	1	1	1	1	1	1	1	1	1	1	1	1	1	1	1	1	1	1	1	1	1	1	1	1	1	1	1	1	1	1	1	1	6	1	1	1	1	1	1	1	1	1	1	3	1	1	1	1	1	1	1	1	1	1	1	1	1	1	1	1	6	1	1	1	1	1	1	1	1	1	1	1	1	1	1	1	1	1	1	1	1	1	1	6	1	1	1	1	1	1	1	1	6	1	1	1	6	1	1	1	1	1	1	71	1	1	1	1	1	1	1	1	1	1	1	1	1	1	1	1	1	1	1	1	1	1	1	1	1	1	1	1	1	1	1	1	1	1	1	1	1	1	1	1	1	1	1	1	1	1	6	1	1	4	4	4	4	6	4	6	6	6	4	4	4	4	4	6	4	4	4	3	4	4	4	4	4	6	3	4	4	4	4	4	4	4	57	1	1	1	1	1	1	1	1	1	1	1	1	1	6	1	6	1	1	1	1	1	1	1	1	1	1	1	1	1	1	1	1	1	1	1	1	1	1	1	1	1	1	1	1	1	1	1	1	1	1	1	1	1	1	1	1	1	1	1	1	1	1	1	1	1	1	6	1	1	1	1	1	1	1	1	1	1	1	1	1	1	1	1	1	1	1	1	1	1	1	1	1	1	1	1	1	1	1	1	1	1	1	1	1	1	1	1	1	41	6	1	1	1	1	1	1	1	1	1	1	1	1	1	1	1	1	1	1	1	1	1	6	1	1	1	1	1	1	1	1	1	1	1	1	1	1	1	1	1	1	1	1	1	1	1	1	1	1	1	1	1	1	1	1	1	1	1	1	1	1	1	1	56	1	1	1	1	1	1	1	1	1	1	1	1	1	1	1	6	1	1	1	1	1	1	1	1	1	1	6	1	1	1	1	1	1	1	1	1	1	1	1	1	1	1	1	1	1	1	1	1	1	1	1	1	1	1	1	1	1	1	1	1	1	1	1	1	1	1	1	1	1	1	69	1	1	1	1	1	1	1	1	1	1	1	118	1	1	1	1	1	1	1	1	1	1	1	1	1	1	1	1	1	1	1	1	1	1	6	67	1	1	1	1	1	1	1	1	1	1	6	1	1	1	1	1	1	1	1	1	1	1	1	1	1	1	1	1	1	1	1	1	1	1	1	1	1	1	1	1	1	1	1	1	1	1	1	1	1	1	1	1	1	1	1	1	1	1	1	1	60	1	1	1	1	1	1	1	1	1	1	1	1	1	1	1	1	1	1	1	1	1	1	6	1	1	1	1	1	1	1	1	1	1	1	1	1	1	1	1	1	1	1	1	1	1	1	1	1	1	1	99	5	1	1	1	1	1	1	1	1	1	1	1	1	1	1	1	1	8	1	1	1	1	75	1	1	1	1	1	1	1	1	6	1	1	1	1	1	1	1	1	1	1	1	1	1	1	1	1	1	1	1	1	1	1	1	1	1	1	1	1	1	1	1	1	1	1	1	1	1	1	1	1	1	1	1	1	1	1	1	1	1	1	1	1	1	1	1	1	1	1	6	438+	6	1	1	1	1	1	1	1	1	1	1	1	1	1	1	1	1	1	1	1	1	1	1	1	1	1	1	1	1	1	1	1	1	1	1	1	1	1	1	1	1	1	1	1	1	1	1	1	1	1	1	1	1	1	6	1	1	1	1	1	1	1	1	1	1	1	1	1	71	1	1	1	1	1	1	1	1	1	1	1	1	1	1	1	1	1	1	1	1	1	1	1	1	1	1	1	1	6	1	1	1	1	1	1	1	1	1	1	1	1	1	1	1	1	1	1	1	1	1	1	1	1	1	1	1	1	1	1	1	1	6	1	1	1	1	1	1	1	1	1	1	1	1	1	1	1	1	1	1	1	1	1	1	1	1	1	1	1	1	1	1	1	1	1	1	1	1	1	1	1	1	1	1	1	1	6	1	1	1	1	6	1	1	1	1	1	37	1	1	1	1	1	1	1	1	6	1	1	1	1	1	1	1	1	6	1	1	1	1	1	1	1	1	1	1	1	1	1	1	1	1	1	1	1	32	1	1	1	1	1	1	1	1	1	1	1	1	6	1	1	1	1	1	6	1	1	1	1	1	1	1	1	1	1	1	1	1	1	63	1	46	1	1	1	1	1	1	1	1	110	1	1	1	1	1	6	1	1	1	1	1	1	1	1	1	1	1	1	1	1	6	1	1	1	1	1	1	1	1	1	1	1	1	1	1	1	1	1	1	1	1	1	1	1	1	1	1	1	1	1	0?	1	1	1	1	1+	1	1	1	1	1	1	1	1	6	1	1	1	1	1	1	1	1	1	1	1	1	1	1	1	1	1	1	1	1	1	1	1	1	1	1	1	1	1	1	1	1	1	1	27	1	1	1	1	1	1	1	1	6	1	1	1	6	1	6	1	1	1	1	1	1	1	1	1	1	1	1	1	1	1	1	1	1	1	1	1	1	1	1	1	6	5	5	5	6	5	5	5	5	5	6	5	4	5	5	1	6	6	1	1	6	6	5	5	5	1	1	1	75	1	1	1	1	1	1	1	1	1	1	1	65	1	1	1	1	1	1	1	1	1	1	1	1	1	1	1	1	1	1	1	1	1	1	1	1	1	1+	1	1	1	6	1	1	1	1	1	1	1	1	1	1	1	1	5	1	1	1	1	1	1	1	1	1	1	1	1	1	1	1	1	1	1	1	1	1	1	1	1	1	1	1	1	1	1	1	1	1	1	1	1	1	1	1	1	1	1	1	1	1	1	1	1	1	1	1	1	1	6	1	1	1	1	1	1	1	1	1	1	1	1	1	1	1	1	1	1	1	1	1	1	1	1	1	1	6	1	1	1	1	1	1	1	1	1	1	1	1	1	1	1	1	1	1	1	1	1	1	1	1	1	1	6	1	1	1	1	1	1	1	1	1	1	1	1	1	1	1	6	1	1	1	1	1	1	1	1	1	1	1	6	1	71	1	1	N	1	1	1	1	1	1	1	1	1	1	1	1	1	1	1	6	1	1	1	1	1	1	1	1	1	1	1	1	1	1	1	1	1	1	1	1	1	1	1	1	1	1	1	1	1	1	1	1	1	1	1	1	1	1	1	1	1	1	1	1	1	1	1	1	6	1	1	1	1	1	1	1	1	1	1	1	1	1	1	1	1	1	1	1	1	1	1	1	1	1	1	1	1	1	1	1	1	1	1	1	1	1	1	1	1	1	1	1	1	1	1	1	1	1	1	1	1	1	1	1	1	1	1	1	1	1	1	1	1	1	1	1	1	1	1	1	1	1	1	1	1	1	1	1	1	1	6	1	1	1	1	1	1	1	1	1	1	1	1	1	1	1	1	1	1	1	1	1	1	1	1	1	1	6	1	1	1	33	1	1	1	1	4	1	1	1	1	1	1	1	8	1	1	1	55	1	1	1	1	1	1	1	1	1	1	68	1	1	1	1	67	1	1	1	1	1	1	1	1	1	1	1	1	1	1	1	1	1	1	1	1	1	1	1	1	1	1	1	1	1	1	1	1	1	1	1	1	1	1	1	1	1	1	1	1	1	1	3	1	1	1	1	1	1	1	1	3	1	1	1	1	1	1	1	1	1	1	1	1	1	1	1	1	1	1	1	1	1	1	1	1	1	1	1	1	1	1	1	1	1	1	1	1	1	1	1	1	1	1	1	1	1	1	1	1	1	1	1	1	1	1	1	1	1	1	1	1	1	3	1	1	1	1	1	1	1	1	1	1	1	1	1	1	1	1	6	1	1	1	1	1	1	6	6	6	6	6	6	9	2	6	1	2	5	1	1	1	6	6	6	3	6	6	6	6	6	6	6	6	6	6	61	1	5	6	1	6	6	6	5	6	6	6	6	6	6	6	6	6	6	6	6	6	6	6	6	6	6	6	39	17	9	16	37	6	6	6	16	6	6	6	6	6	6	72	16	3	3	3	3	3	3	3	3	3	3	6	3	3	3	3	3	16	6	6	12	6	32	4	6	6	6	6	6	54	6	5	5	6	6	35	13	6	6	34	5	1	6	6	2	34	14	41	12	37	17	17	16	3	44	6	6	4	5	6	6	6	5	3	6	5	6	6	6	6	6	6	6	6	6	6	6	6	6	6	6	6	6	46	160+	6	6	2	1	6	6	6	3	3	6	6	6	6	6	6	6	5	46	3	3	3	39	3	3	3	3	3	31	41	17	3	3	3	22	3	3	2	35-	3	2	3	3	3	3	1	3	3	3	34	71	30	34	3	38	1	45	60	30	54	36	38	38	3	3	40	6	4	5	5	6	6	5	5	6	39	6	13	6+	0	0
GCA_000214965.2_gacin09v1.0_genomic.fna	2	2	15	2	2	2	1	1	51	16	1	2	2	2	2	2	2	2	2	17	2	2	2	2	2	N	15	2	13	14	2	11	13	12	2	2	2	2	2	2	2	2	16	16	15	66	76	30	2	52	87	34	50	44	53	71	70	N	1	17	3	202	N	69	74	105	25	105	88	16	17	17	16	14	2	2	2	2	2	2	2	101	2	2	2	2	18	19	19	2	2	47	34	41	37	34	42	2	2	2	12	2	2	2	2	2	2	2	4	2	2	2	1	2	1	1	2	2	2	2	1	2	N	2	2	2	2	2	2	2	2	2	2	N	2	2	2	2	2	2	2	2	2	2	2	2	2	2	2	2	2	N	2	2	2	2	2	2	2	2	2	2	2	2	2	2	2	16	2	2	2	2	2	2	2	N	2	16	2	2	2	2	2	2	2	2	2	2	2	2	2	2	2	2	2	2	1	1	1	2	1	2	2	2	1	1	1	2	2	1	2	2	2	2	2	40	2	15	2	16	2	2	2	39	15	2	2	48	2	2	2	N	2	2	2	2	2	N	2	2	53	2	2	2	52	2	15	16	8	2	2	14	2	2	2	15	2	2	15	2	2	2	2	N	82	2	33	2	1	2	2	2	2	2	2	N	2	2	2	2	2	2	2	2	2	14	2	2	1	2	2	2	2	2	2	2	2	2	1	2	2	2	2	2	2	15	2	2	2	2	2	2	2	15	2	2	2	2	2	1	2	2	2	49	2	2	2	10	N	2	N	2	2	2	2	1	2	2	2	2	2	2	2	2	2	1	1	2	2	2	2	1	2	16	2	2	2	2	2	N	2	1	2	2	2	2	2	15	16	15	2	2	2	16	2	2	2	2	2	2	2	2	2	2	2	2	2	2	2	1	2	28	2	2	2	2	2	2	2	2	2	2	2	16	2	2	2	2	N	2	2	2	2	2	2	16	2	17	2	N	2	2	14	2	2	2	1	2	2	2	2	2	2	2	2	2	2	2	2	2	2	2	1	2	16	2	2	2	2	2	1	1	44	N	2	2	2	2	2	2	2	2	2	2	2	N	2	2	2	2	2	2	N	1	2	2	2	2	2	2	2	2	2	47	2	2	2	2	2	2	2	2	2	2	15	2	N	2	15	17	2	2	2	2	2	2	2	2	2	1	2	2	2	2	2	2	1	2	2	2	2	2	2	2	2	2	2	2	2	2	2	15	2	2	16	2	2	2	2	2	2	2	2	2	2	2	2	2	2	2	N	2	2	2	2	2	2	2	2	2	2	2	2	2	2	2	2	2	2	2	2	1	1	40	2	1	2	2	2	2	16	2	2	38	1	2	2	2	2	2	2	2	2	N	16	2	2	2	2	2	2	2	2	62	2	2	2	2	2	1	1	2	2	2	N	2	2	78	2	2	1	N	14	2	N	2	2	2	N	2	2	2	2	2	2	2	2	2	2	2	2	2	2	2	2	2	2	2	2	2	2	15	2	2	1	2	18	2	2	2	2	2	2	2	2	2	2	2	58	2	2	2	2	2	2	2	2	2	2	2	2	15	16	2	2	2	2	1	2	2	2	N	2	N	2	103	2	2	2	2	2	2	2	2	53	2	2	2	2	16	2	2	2	2	2	2	2	2	2	2	45	2	2	2	2	1	2	2	2	2	2	2	2	2	2	2	2	2	2	2	2	2	2	2	2	2	2	2	2	2	1	2	2	2	2	2	2	2	2	2	2	2	2	2	2	2	2	2	2	2	15	2	2	15	2	2	2	2	1	2	2	1	43	2	2	2	2	2	2	2	2	2	67	1	1	2	2	2	2	2	2	2	2	2	2	2	57	2	215+	2	64	2	2	2	2	2	2	2	2	2	2	2	2	2	2	2	15	N	2	1	2	2	47	2	2	2	2	2	2	2	2	2	2	16	1	N	2	2	2	2	2	2	N	2	2	2	2	2	2	2	2	2	16	2	2	15	51	2	2	2	2	2	2	2	2	43	2	2	2	16	2	2	17	2	2	2	2	2	2	2	15	2	55	66	2	2	2	2	2	N	2	N	2	2	N	2	2	N	2	2	16	2	2	16	2	2	2	2	2	2	2	2	2	2	364-	2	15	2	2	2	2	2	2	2	2	2	2	53	17	4	2	2	2	10	2	2	15	2	2	N	2	2	N	2	2	2	2	2	16	2	2	100	2	2	2	2	2	2	2	2	2	2	2	2	2	2	2	2	2	2	2	N	2	2	13	2	2	2	2	N	2	2	2	2	2	2	2	1	1	2	2	2	2	2	15	2	2	2	2	1	2	2-	17	2	2	16	2	2	2	2	1	2	2	2	2	2	2	2	2	N	2	N	2	2	2	2	2	2	2	2	2	2	2	2	2	N	2	16	2	2	2	2	17	3	3	3	15	16	33	12	11	15	2	2	2	2	2	2	1	2	2	2	N	2	N	2	2	2	2	2	2	2	2	2	2	1	2	2	2	2	2	2	2	45	N	2	2	2	2	2	1	2	N	2	2	2	2	2	15-	2	2	2	2	2	2	2	2+	2	2	2	2	2	N	2+	2	2	2	2	2	2	2	2	17	2	2	2	2	2	2	2	2	2	2	2	16	2	16	2	2	2	2	2	2	2	16	2	2	N	2	2	2	2	2	2	N	2	2	61	2	2	2	2	2	2	2	2	2	2	57	16+	2	2	2	2	2	N	2	2	2	2	2	2	2	2	2	2	2	2	2	13	93	2	16	16	N	2	2	2	2	10	2	2	14	8	8	15	2	N	16	15	16	16	15	15	14	2	34	2	2	2	54	2	2	2	N	N	2	2	2	2	2	15	2	2	2	2	2	2	2	2	2	2	2	2	N	2	2	2	2	2	2	2	2	N	2	2	2	2	2	2	2	2	55	2	N	1	2	2	2	2	2	2	2	1	2	1	2	2	15	1	2	2	2	2	2	1	2	2	2	2	2	2	2	2	N	2-	2	N	2	2	2	2	2	2	2	2	2	2	2	2	1	2	2	2	1	2	2	2	2	2	2	2	2	2	1	2	2	2	2	2	2	2	97	2	2	2	2	2	2	2	1	2	2	2	2	1	2	2	2	2	2	2	2	2	2	2	N	2	2	2	2	N	2	2	2	2	2	2	2	2	2	2	2	2	2	2	2	2	2	N	2	N	1	N	2	2	2	2	2	15	2	2	2	2	61	2	2	2	2	2	2	2	2	2	2	2	43	2	16	2	2	1	1	2+	2	2	1	2	2	79	2	2	2	2	17	2	2	2	2	2	2	2	2	2	2	N	2	2	2	2	2	2+	2	2	N	2	13	2	2-	2	2	2	2	1	1	2	2	2	2	2	2	6	2	15	2	2	2	1	2	2	49	2	15	2	2	2	N	2	2	2	2	2	2	2	2	N	N	2	2	N	2	2	2	N	15	47	16	1	2	2	2	2	2	2	2	2	42	2	13	2	1	1	2	2	1	2	2	2	15	2	2	2	2	2	2	2	2	16	1	2	2	2	2	2	1	16	2	2	2	2	2	16	2	2	2	2	2	2	2	2	2	2	2	2	2	2	2	2	2	2	2	2	2	16	2	2	2	2	2	2	2	2	N	2	2	2	11	15	10	7	13	14	15	14	2	2	2	14	16	2	2	N	2	2	3	64	2	N	2	15	2	2	2	2	2	16	16	2	N	2	2	2	2	59	17	2	2	2	2	2	2	2	2	2	2	N	2	2	2	2	2	2	2	2	2	2	2	2	2	2	N	16	2	14	2	2	2	2	15	2	16	2	2	2	2	2	15	2	2	2	2	N	2	2	16	2	2	14	2	2	2	2	2	2	2	16	51	2	2	2	2	44	2	7	7	7	7	N	1	43	11	N	2	2	2	53	4	7	6	4	7	7	7	55	8	50	N	43	55	7	8	40	52	55	38	47	116	11	51	43	6	34	52	3	2	60	2	16	2	2	1	2	2	2	2	1	2	2	2	2	2	2	1	2	2	2	2	2-	2	16	2	2	2	2	2	16	2	2	2	16	2	2	2	2	2	1	2	2	N	2	2	30	2	2	2	2	15	2	N	2	2	2	2	2	2	N	2	2	N	2	1	2	2	2	0?	2	2	2	2	2	2	N	2	2	2	2	2	2	2	2	32	2	N	2	2	2	2	13	2	2	2	64	2	2	1	2	2	2	2	2	1	2	2	2	N	2	2	2	2	2	2	1	1	1	1	2	2	2	2	2	2	2	2	2	2	2	2	2	2	15	N	N	2	2	2	2	2	2	2	2	2	2	2	2	2	N	N	2	1	2	2	2	2	2	2	15	2	2	2	2	2	2	2	2	53	2	2	N	2	2	2	2	1	2	2	16	2	2	2	2	N	2	2	2	2	2	2	2	2	2	2	N	2	2	2	2	2	57	37	N	38	15	1	N	24	12	11	13	68	14	12	24	27	9	2	N	10	2	2	2	2	2	2	13	2	2	2	14	2	2	2	2	2	2	2	2	2	2	2	2	2	7	14	15	N	9	N	43	2	N	2	2	1	2	2	2	2	2	2	2	2	2	1	2	2	2+	2	2	N	2	2	2	2	2	2	2	2	2	2	1	1	2	2	2	2	N	2	2	2	2	2	2	2	2	2	2	2	N	2	6	2	N	2-	2	2	2	2	2	1	2	9	2	2	2	2	2	2	1	2	2	1	1	1	8	2	1	1	1	2	1	1	1	1	1	1	1	1	2	1	1	12	1	2	1	1	2	2	2	2	2	2	2	N	2	2	2	2	1	1	N	2	1	2	2	2	2	6	2	2	2	2	2	2	2	2	2	2	2	2	2	2	2	2	2	2	2	2	2	2	2	2	2	2	2	2	59	36	44	35	15	50	35	N	47	2	49	46	54	91-	1	37	22	1	38	72	32	36	14	31	48	2	5	64	1	2	39	99	37	68	117	43	N	21	73	43	N	55	81	54	14	37	62	55	90	1	2	57	2	2	2	2	2	2	2	2	2	2	2	2	2	2	16	13	2	2	2	2	2	2	2	2	2	60	2	62	2	13	2	2	2	2	2	2	2	2	N	2	2	2	2	2	2	2	2	2	13	2	2	2	15	2	2	2	N	2	2	2	2	16	2	2	2	2	N	2	2	2	2	2	2	2	2	2	2	73	2	2	1	1	2	2	2	16	14	3	15	16	14	15	N	8	75	10	10	10	9	N	18	2	2	1	2	2	N	2	2	2	2	2	2	2	17	10	10	10	11	10	62	15	10	17	10	2	2	2	2	2	2	2	1	3	15	2	2	1	2	2	2	84	2	2	2	2	2	2	2	2	2	2	2	2	2	2	2	2	2	2	2	2	2	2	2	2	2	N	2	1	N	16	4	4	4	4	15	2	N	1	16	2	2	2	2	2	2	2	2	2	2	2	2	2	2	2	2	2	2	N	2	76	2	0	0
GCA_000214985.2_gacin10v1.0_genomic.fna	6	9	4	4	4	2	1	1	9	9	1	4	4	8	9	8	9	9	9	9	5	7	9	9	1	N	9	2	3	9	2	3	4	4	6	6	10	1	10	7	6	35	45	57	9	49	13	10	5	12	13	13	12	11	1	13	13	49	13	54	45	179	49	50	52	12	12	11	13	11	12	12	12	7	12	11	11	12	12	12	12	12	11	12	12	9	9	9	9	9	9	9	8	9	8	4	9	9	9	8	9	8	3	7	8	9	9	9	8	4	4	4	3	3	1	1	2	8	2	9	1	8	1	9	8	9	10	3	9	9	3	8	9	4-	9	9	7	9	9	10	9	2	8	8	9	43	8	9	7	9	9	9	9	9	8	4	1	3	9	8	9	8	9	3	8	9	9	8	8	8	9	7	8	9	9	9	3	8	8	N	8	9	1	8	3	8	40	8	8	7	8	8	8	8	8	9	1	5	N	8	8	7	8	8	1	1	2	2	1	1	9	9	1	N	6	9	4	4	6	8	8	6	N	8	4	7	8	7	9	8	4	8	8	8	8	9	9	9	1	9	9	9	8	9	9	9	8	8	6	7	9	7	8	6	8	8	9	8	8	8	8	4	N	8	9	8	8	9	1	8	8	9	8	8	9	10	8	9	3	7	9	7	4	8	7	8	8	9	2	4	4	4	4	7	8	8	4	6	1	4	4	4	8	8	4	8	8	9	8-	8	8	8	1	8	8	1	8	2	8	1	8	8	8	8	9	8	9	8	9	8	4	8	1	8	N	5	8	8	7	9	7	7	6	2	8	1	1	8	8	7	8	4	8	8	8	3	8	8	8	N	5	1	N	6	8	6	8	8	8	8	8	8	8	8	8	8	8	7	8	7	49	8	8	8	8	8	8	8	3	1	8	7	8	8	7	9	7	2	5	8	8	8	N	8	8	8	8	8	8	8	8	4	8	8	N	8	9	9	9	8	7	8	8	7	9	8	1	8	6	8	8	8	4	4	60	4	4	8	8	2	2	26	1	8	8	8	1	4	4	8	1	1	8	8	48	5	8	1	8	8	7	8	8	8	6	N	7	8	6	9	9	8	4	1	8	8	8	8	8	9	5	6	6	10	6	8	9	9	6	8	6	9	9	10	9	9	9	9	7	9	8	8	8	8	8	8	8	8	8	1	8	3	8	14	6	8	2	1	9	7	7	8	8	4	8	6	8	6	9	7	7	8	8	1	8	1	8	8	7	5	8	8	8	8	8	8	N	8	8-	8	9	N	8	8	8	8	9	8	3	8	8	8	8	8	9	8	8	3	3	4	4	1	1	4	4	3	3	4	8	9	8	8	7	7	1	6	4	3	4	4	4	8	9	8	8	6	3	8	8	9	9	8	8	8	8	8	4	8	39	3	1	8	8	8	8	8	8	9	8	6	2	1	8	8	8	6	8	7	8	9	7	8	9	8	1	6	8	1	8	9	8	8	9	8	8	9	6	8	8	8	8	8	8	9	7	9	9	9	8	8	8	8	8	9	9	8	7	5	8	8	8	1	8	9	6	8	8	7	8	8	9	8	9	8	7	9	7	7	8	9	8	9	6	22	9	8	10	8	10	8	8	8	8	8	8	8	6	4	8	8	7	4	1	3	8	6	4	37	6	8	9	8	8	34	8	2	8	6	3	8	8	10	9	8	8	9	8	9	9	9	9	9	8	8	8	8	4	4	8	9	5	7	8	8	8	7	7	3	8	9	8	151-	8	8	8	55	8	8	8	8	8	9	4	8	4	4	4	4	1	8	8	N	8	8	7	26	8	5	8	8	8	7	9	7	7	8	8	8	8	8	8	3	6	8	5	5	8	8	8	8	8	8	8	6	9	4	8	7	3	3	3	8	2	2	N	4	8	8-	6	5	56	8	8	8	8	8	2	8	8	9	8	8	7	8	2	32	9	9	7	8	4	7	7	8	4	4	8	8	8	8	9	8	8	8	8	8	8	8	8	9	9	9	8	8	8	9	8	8	8	13	8	8	9	7	8	8	8	7	8	8	8	8	8	8	8	8	8	8	8	N	3	3	8	2	8	9	8	7	5	8	8	7	8	9	4	3	4	9	8	8	4	9	8	8	7	7	8	8	8	8	8	9	8	8	8	8	9	9	8	7	9	8	1	7	7	8	8	8	8	8	8	7	8	8	8	8	1	6	8	8	8	9	9	3	8	9	8	7	8	8	8	9	8	2	7	6	N	8	7	1	7	5	8	8	7	8	8	8	8	6	N	6-	5-	8	8	8	9	7	23	8	8	8	8	7	8	8	8	8	N	1	N	3	9	8	9	10	3	3	7	40	6	10	3	9	9	8	9	7	5	N	8	9	9	8	8	9	34	3	6	9	9	8	1	8	8	9	10	9	9	9	8	9	9	4	9	9	9	9	9	8	6	6	9	8	9	7	9	9	1	9	2	9	9	1	9	2	8	9	3	5	8	9	1	8	7	1	9	2	9	52	9	8	8	9	9	19	47	43	9	8	6	9	2	8	9	8	9	9	8	10	8	8	8	8	8	7	5	2	4	7	4	4	7	1	4	6	57	8	5	4	7	6	8	9	9	9	8	8	8	9	9	9	9	9	9	9	9	9	9	9	9	9	9	9	9	9	8	8	9	34	3	3	8	2	N	9	8	9	8	8	8	8	7	8	8	8	8	8	8	8	3	9	7	9	8	8	8	8	7	8	8	8	8	8	8	1	7	8	4	4	9	7	8	8	8	8	9	7	8	8	8	8	8	8	8	8	8	8	13	8	9	9	8	8	8	8	8	8	8	9	8	8	8	8	8	8	8	8	8	3	9	8	6	7	7	7	8	8	8	8	8	8	7	8	5	8	8	8	8	6	9	6	8	8	9	8	7	8	8	8	8	8	8	2	8	2	8	8	3	4	8	7	7	5	4	1	2	8	8	1	8	9	8	54	8	2	7	9	9	6	5	8	5	8	8	8	9	9	8	7	7	2	N	8	7	8	7	7	3	8	8	8	8	7	7	4	8	8	4	7	2	8	8	8	3	8	8	6	8	8	9	3	10	8	8	8	7	9	9	8	N	7	8	59	4	1	8	2	8	8	8	8	9	9	8	8	N	8	8	8	8	9	1	8	8	8	8	5	9	4	8	4	4	3	7	3	7	8	8	1	7	5	2	8	7	6	7	8	8	115	7	8	9	7	9	8	8	8	8	8	9	8	8	8	4	8	7	3	13	8	2	7	4	8	8	8	1	8	1	8	8	6	N	9	N	8	7	8	8	N	8	4	9	9	8	3	4	8	8	7	8	8	8	8	14	N	4	9	1	4	4	4	2	1	1	1	4	4	9	8	8	8	8	8	5	9	8	1	8	8	8	8	8	8	2	8	9	8	8	8	8	8	7	6	6	7	N	8	6	8	7	9	8	8	8	8	8	1	1	9	9	8	8	8	4	4	4	4	1	4	1	1	8	1	1	4	7	2	8	4	6	73	8	2	8	8	8	8	1	8	8	7	8	8	4	9	8	8	8	9	8	4	4	4	8	8	8	8	8	8	7	4	8	8	1	7	8	8	7	8	6	4	8	9	4	4	8	9	8	8	8	5	8	8	8	8	8	9	7	1	1	8	8	45	9	9	4	45	44	40	2	N	11	36	56	40	36	53	8	8	8	8	40	9	8	8+	8	8	8	8	8	9	9	8	9	3	8	13	1	9	7	7	4	4	4	4	4	8	6	8	8	4	4	4	3	9	N	10	9	9	9	9	9	8	4	4	4	8	8	7	8	8	8	8	8	7	8	8	8	7	7	6	4	40	8	9	4	4	4	9	8	8	8	8	4	8	8	8	8	9	8	8	8	8	8	8	6	8	1	6	6	8	8	8	8	8	N	8	7	7	8	8	8	8	9	8	8	8	8	7	8	8	8	1	8	9	8	7	8	7	8	8	8	6	2	8	8	N	8	7	3	9	8	9	7	1	8	8	7	7	7	8	3	3	7	2	8	8	7	8	8	8	47	8	7	8	8	8	9	9	8	8	8	8	8	1	8	8	N	8	8	4	8	8	9	8	8	97	5	6	9	4	8	9	7	N	10	8	10	7	1	8	8	8	0?	8	8	8	8	7	1	8	1	1	1	8	8	9	7	7	8	6	8	4	8	4	4	8	4	4	4	4	4	8	1	2	2	3	8	8	1	8	4	8	7	8	8	1	8	4	4	3	7	4	2	1	8	9	8	9	4	4	4	4	4	4	10	4	4	8	N	8	7	8	7	8	4	4	4	8	8	8	8	8	9	6	6	9	3	9	9	9	9	1	9	9	N	9	9	9	8	8	5	4	4	4	4	8	8	4	3	8	1	4	8	8	8	N	3	4	8	8	9	8	2	5	8	7	8	44	8	N	7	9	8	7	8	8	8	7	8	7	1	4	4	4	4	4	4	4	3	4	8	8	8	40	8	8	8	8	8	9	8	9	8	8	8	8	8	4	8	8	7	8	7	9	8	7	4	8	8	0?	8	8	7	6	9	8	4	N	4	8	1	8	8	8	8	7	8	3	5	8	1	8	8	3	5	9	8	8	8	8	8	7	8	7	8	9	8	1	1	4	3	4	53	8	2	8	8	4	8	8	9	8	9	7	8	8	7	5	N	8	7	8	2	7	9	8	6	8	8	8	7	8	1	20	9	1	1	2	1	1	1	4	4	1	1	1	3	2	1	2	1	1	1	1	1	1	3	1	4	1	1	4	1	7	9	8	8	8	8	9	8	8	8	4	9	1	1	8	2	1	7	8	8	8	5	7	8	8	8	8	2	8	4	8	4	8	8	3	8	8	9	8	9	8	8	8	8	6	7	8	8	8	8	13	8	8	8	8	8	8	8	8	6	8	9	9	8	1	4	3	1	4	10	8	9	9	9	4	4	1	9	6	1	4	8	4	7	9	9	4	2	7	8	9	9	10	10	1	10	10	10	10	4	7	4	3	4	4	4	7	9	4	9	9	4	9	10	9	14	9	4	9	3	9	8	9	9	9	9	9	9	8	10	9	3	9	9	9	9	9	9	9	9	9	9	9	8	8	8	8	8	9	8	8	8	8	9	7	8	8	8	9	9	4	4	4	N	4	4	4	9	4	4	8	9	9	6	8	9	9	2	44	4	4	4	8	6	9	9	9	9	7	8	10	9	4	4	4	7	9	9	8	8	5	9	10	9	8	1	9	8	9	10	9	13	9	9	9	8	9	9	9	9	10	9	10	9	9	9	9	48	9	6	1	9	9	9	1	2	2	9	9	0?	56	9	9	9	8	7	13	9	9	9	9	8	2	9	9	8	66	40	4	31	2	2	40	46	40	17	2	12	6	9	7	1	10	9	9	9	80	9	4	9	N	1	9	9	9	9	9	4	4	4	4	4	N	3	4	8	9	9	9	6	9	9	9	9	9	0	0
GCA_000215005.2_AcbauOIFC032v1.0_genomic.fna	2	12	11	11	11	1	1	1	12	12	1	11	2	10	12	11	12	12	11	12	10	8	12+	12	6	19	19	10	16	17	2	13	16	14	6	8	19	17	21	16	14	17	20	20	19	19	22	9	5	5	12	12	11	5	11	12	12	12	8	25	21	72	N	10	21	27	24	27	N	20	22	22	23	16	17	16	16	19	13	13	63	18	8	14	19	13	14	14	15	14	18	16	13	8	13	12	15	18	5	13	15	14	12	11	13	17	16	16	17	15	16	13	3	5	1	1	6	31	18	41	19	39	9	37	43	6	6	6	6	6	5	6	6	N	6	6	4	6	6	6	6	5	5	N	6	6	5	6	5	6	71	71	35	10	1	28	1	8	43	21	45	38	28	2	30	14	20	94	38	31	35	8	33	44	30	33	1	87	10	44	46	37	1	30	3	64	35	36	33	21	33	35	18	7	33	40	3	2	27	34	84	32	24	43	1	1	1	2	2	9	139	90	3	4	12	49	48	117	59	59	31	16	N	79	5	53	69	34	41	58	27	38	42	60	40	41	60	N	4	51	60	53	52	58	64	41	53	104	7	23	19	38	48	17	83	37	42	51	56	22	37	4	34	N	95	10	10	11	1	10	10	25	10	9	11	49	42	36	16	27	35	17	18	38	4	4	4	19	1	49	24	30	25	21	40	50	66	41	13	35	11	56	49	35	9	70	4	10	29	44	71	50	6	95	0?	1	46	4	41	1	33	32	N	34	35	51	36	39	77	12	34	45	1	37	1	13	95	61	10	52	6	17	16	1	45	1	1	32	27	4	42	1	32	95	31	36	26	35	43	42	5	1	17	74-	5	1	42	102	73	37	41	59	32	81	52	62	43	34	43	26	43	14	14	32	36	71	49	29	1	25	31	22	35	34	24	37	49	2	1	35	15	34	5	12	41	40	34	23	N	38	71	23	8	41	20	52	37	53	42	6	25	35	23	2	48	43	1	37	34	9	45	5	3	31	40	30	33	59	4	27	30	24	1	5	54	46	4	29	29	39	1	1	30	27	42	1	50	3	37	30	1	37	57	42	2	27	1	30	7	18	37	57	N	7	40	29	62	9	32	21	5	19	28	33	36	3	12	28	58	33	27	54	36	33	38	36	35	42	78	48	90	70	63	N	67	71	77	58	39	3	70	1	37	45	13	72	9	9	72	7	41	42	26	17	8	13	61	34	26	26	25	37	N	11	91	2	32	26	30	3	38	26	32	34	28	8	39	30	39	35	30	48	14	76	27	43	31	44	23	44	65	50	39	43	31	29	7	3	25	12	8	1	1	28	22	1	23	64	41	31	N	14	1	2	1	18	31	6	37	34	35	32	38	30	83	20	3	93	33	35	37	39	49	42	29	33	1	22	35	1	2	40	35	27	26	23	38	49	36	1	13	8	20	22	33	36	36	8	34	36	30	28	39	19	1	15	33	32	32	48	39	33	31	32	40	39	31	36	45	39	47	103	38	52	24	37	141-	60	32	269-	36	75	71	48	59	29	48	3	36	73	7	18	82	5	4	5	5	5	5	5	68	5	5	5	4	39	59	47	46	78	36	5	29	76	38	116	39	N	36	15	63	39	35	31	66	28	31	32	42	N	25	40	1	3	16	38	45	31	24	21	60	N	32	31	39	11	55	5	23	29	34	44	55	45	7	32	11	13	6	1	33	9	33	50	26	14	5	15	40	40	7	11	21	2	33	25	11	16	28	33	8	31	38	87	78	34	35	38	32	44	48	9	6	58	52	29	21	42	1	32	43	N	54	3	5	10	68	4	53	51	27	25	40	33	70	39	38	32	36	42	15	7	2	16	5	1	90	19	17	18	20	19	19	3	51	16	17	14	15	12	15	34	2	15	N	10	21	48	4	24	79	38	57	67	56	43	41	53	101	69	49	54	46	9	2	50	91	60	66	64	55	68	28	35	4	N	65	42	42	44	46	76	61	40	58	37	35	36	32	43	40	36	53	35	37	33	33	68	44	42	30	40	7	58	62	20	34	1	74	37	127	62	37	46	38	39	37	28	48	N	1	3	18	16	N	25	32	N	1	31	54	52	77	112	36	3	37	34	35	67	37	78	61	33	35	37	38	35	65	11	32	69	37	56	55	44	39	37	114	66	72	43	17	0?	5	40	19	35	4	99	34	52	89	7	36	60	1	10	63	32	32	74	64	26	27	32	31	53	5	54	32	41	34	26	51	30	15	16	36	1	29	N	35	N	1	3	38	28	29	10	12	21	24	21	52	32	76	1	1	28	37	6	9	12	79	40	26	28	N	1	7	22	48	24	36	28	3	28	17	67	1	40	3	3	31	6	11	9	46	37	0?	27	30	1	32	31	28	6	43	30	27	27	5	39	4	9	36	29	5	42	1	1	61	8	24	29	N	16	44	24	N	35	N	N	28	5	30	29	1	24	29	N	28	6	53	5	7	38	11	10	1	50	2	25	24	1	N	40	55	45	37	17	10	12	42	37	42	N	32	0?	5	34	25	25	75	31	45	81	35	34	35	47	28	33	58	3	3	34	2	18	2	34	96	20	2	13	20	22	23	3	1	25	40	37	9	37	34	32	34	17	38	42	34	40	39	43	34	47	42	34	35	69	25	55	40	49	6	80	33	29	37	65	31	7	4	33	44	38	34	32	52	61	N	45	60	39	32	36	13	121	3	36	27	33	36	2	60	35	26	106	40	39	39	11	77	16	7	31	35	39	53	30	52	62	85	37	57	N	36	51	39	33	96	133	33	31	34	92	33	39	41	36	31	40	27	20	48	43	11	41	30	33	38	47	N	42	33	2	32	20	47	35	42	6	7	4	7	31	35	37	33	36	31	34	1	62	46	33	81	52	43	3	42	8	33	33	27	26	36	70	35	78	36	12	51	2	42	37	2	2	49	10	32	11	22	1	25	53	107	1	24	30	28	14	3	2	26	N	44	4	14	43	17	35	34	N	39	65	21	14	6	1	N	32	28	18	36	24	3	32	7	56	59	1	23	29	32	49	34	26	15	29	3	4	12	14	33	2	50	16	16	22	110	40	34	85	9	54	38	58	N	3	28	33	13	1	42	26	35	31	31	58	45	38	36	29	9	41	82	32	76	83	29	39	30	65	37	15	32	19	70	32	21	3	11	1	26	51	40	11	2	2	1	N	26	28	26	35	34	146	22	60	45	1	39	28	34	35	74	83	43	56	28	39	8	33	27	46	50	42	2	34	3	32	56	39	11	40	16	55	5	25	67	34	61	24	107	73	27	N	34	30	N	69	40	13	58	58	63	5	9	36	31	30	42	41	24	77	22	19	72	18	4	1	1	1	35	33	30	38	32	73	28	64	5	10	7	1	36	42	34	11	66	37	2	29	34	0?	61	6	38	33	29-	2	2	N	N	69	6	42	75	56	29	59	19	20	70	1	8	40	18	14	16	29	16	22	9	8	8	32	1	11	30	15	4	40	35	3	59	30	37	49	34	6	6	38	5	83	1	31	38	5	37	37	23	142	32	4	18	30	31	48	28	55	50	65	41	35	31	31	35	27	54	41	1	26	N	34	30	31	10	3	36	5	40	31	35	45	1	9	25	56	N	N	38	34	45	N	6	1	24	38	35	38	81	44	29	45	44	40	2	N	11	36	56	40	N	N	11	74	77	67	36	48	42	44	51	34	35	80	86	71	67	75	92	13	24	74	1	58	1	30	35	10	25	13	35	21	4	31	17	31	6	40	34	47	38	32	77	58	29	72	69	1	6	35	34	27	67	26	90	34	34	27	31	18	33	39	N	38	26	14	40	24	149	40	39	52	3	36	31	63	33	65	29	91	35	34	64	36	29	29	34	41	5	36	20	N	1	N	69	9	25	31	27	35	12	68	21	29	39	23	44	34	6	34	N	26	7	3	3	N	35	33	24	16	95	14	30	26	8	3	31	2	6	62	49	73	32	22	7	29	21	45	12	1	36	15	20	14	8	31	33	16	59	24	68	59	46	76	27	39	11	35	38	11	40	28	N	59	33	2	53	33	35	4	33	41	51	36	34	37	65	111	N	33	33	105	25	22	71	1	36	43	34	33	51	69	34	21	1	44	43	44	0?	38	4	31	34	3	17	34	60	1	12	6	64	64	11	N	1	26	N	36	42	30	114	21	32	2	3	43	9	16	1	2	12	11	58	18	1	37	4	33	12	36	14	49	28	20	67	17	23	1	1	1	31	53	39	44	37	30	29	27	35	28	56	61	43	47	51	N	27	31	41	35	27	94	29	34	38	34	34	34	38	38	56	50	2	45	32	59	56	1	78	40	35	36	40	37	34	59	3	46	36	45	2	35	N	28	8	36	1	33	30	53	57	2	1	5	28	35	44	34	7	17	30	23	30	31	34	6	23	33	20	22	21	39	65	28	62	31	1	22	56	2	42	49	65	33	27	34	38	48	34	67	22	83	37	43	1	66	9	58	22	23	25	35	61	10	10	70	11	70	39	72	84	50	27	7	79	75-	N	11	N	50	95	37	57	58	30	36	1	72	33	42	17	35	30	10	19	39	1	21	11	7	11	36	28	35	37	29	35	11	28	6	19	38	36	1	3	29	1	26	28	N	1	29	4	N	28	33	38	39	35	26	28	18	29	1	34	N	32	44	9	23	38	46	16	22	59	6	49	26	4	36	54	1	5	3	1	1	1	53	6	1	1	1	3	1	1	1	1	1	1	1	1	1	1	1	3	1	2	1	1	19	50	38	8	14	32	32	43	3	45	30	40	6	2	30	2	17	21	34	28	36	22	33	38	56	40	14	5	14	16	14	13	15	15	11	14	14	16	14	18	14	16	N	13	2	3	10	14	10	10	16	15	N	15	15	15	12	13	14	6	13	14	15	18	1	13	4	1	8	12	10	10	5	11	9	4	1	14	7	1	9	14	11	14	20	6	6	3	6	6	6	6	85	6	6	6	6	6	14	1	5	6	1	6	6	6	5	6	6	6	6	6	6	6	57	6	6	6	N	6	6	6	6	6	6	6	6	6	6	48	6	6	6	6	16	6	6	6	6	6	6	6	16	3	3	3	3	3	71	3	3	3	3	6	3	3	3	3	3	16	6	6	12	6	6	4	6	6	6	6	6	6	6	5	5	6	N	6	13	6	6	6	5	1	6	6	6	6	3	5	6	6	6	6	15	9	12	12	11	11	10	12	13	17	10	1	12	10	N	13	1	11	1	11	12	2	12	12	12	12	5	12	13	12	12	12	12	11	11	7	1	12	12	11	1	3	11	12	12	11	12	12	12	12	11	10	16	12	12	12	20	11	10	12	12	N	12	11	10	7	8	10	12	11	12	10	2	11	7	N	9	1	N	12	12	12	12	11	11	11	11	5	12	12	11	12	12	11	11	11	11	10	16	3	10	10	12	12	12	6	12	12	12	12	11	0	0
GCA_000222225.2_ASM22222v2_genomic.fna	2	18	11	11	11	1	1	1	12	12	1	11	2	10	12	11	12	12	11	12	10	8	12+	12	6	N	19	10	16	17	2	13	16	14	6	8	19	17	19	16	14	17	20	20	19	19	22	9	5	5	12	12	11	5	11	12	12	12	8	25	21	72	10	10	21	27	24	27	26	20	22	22	23	16	17	16	16	19	13	13	18	18	8	14	19	13	14	14	15	14	18	16	13	8	13	12	15	18	5-	13	15	14	12	11	13	17	16	16	17	15	N	13	3	5	1	1	1	1	1	1	1	1	1	1	1	1	1	1	1	1	1	1	1	10	15	1	1	1	1	1	1	1	1	1	1	1	2	1	N	1	N	N	1	1	1	1	1	1	1	1	13	1	1	1	1	6	6	5	5	N	6	4	1	1	1	32	1	1	1	1	1	1	1	1	1	1	1	1	1	1	1	1	1	1	1	6	1	1	1	1	1	1	1	1	1	1	1	1	1	1	1	1	1	1	1	1	N	20	1	1	1	1	1	1	1	1	1	1	6	1	1	N	1	1	1	1	1	N	1	1	1	1	1	1	1	1	1	1	1	1	1	1	1	1	1	1	1	1	1	1	1	1	N	1	1	1	1	1	1	1	1	1	1	1	1	6	41	1	1	1	1	1	1	1	1	1	1	1	1	1	1	1	1	1	1	1	1	15	1	1	1	1	1	1	1	1	1	1	1	1	1	1	1	1	1	1	1	1	1	1	1	1	N	1	1	1	1	1	1	1	13	1	N	1	1	1	1	1	1	1	1	1	1	1	1	1	1	1	1	1	1	1	1	1	1	1	1	1	1	N	1	1	1	10	1	1	1	1	1	1	1	1	1	1	1	1	1	1	1	1	41	1	1	1	1	1	1	1	1	1	1	1	1	1	1	6	1	1	1	N	1	1	1	17	1	1	1	1	1	1	1	1	1	1	1	1	1	6	13	1	1	1	1	1	1	1	1	1	1	1	1	1	1	1	1	1	1	1	1	1	1	1	1	1	1	1	1	1	1	1	1	1	1	1	1	1	1	1	1	1	1	1	1	1	1	N	1	1	1	1	1	1	N	1	1	1	1	1	N	1	1	1	1	6	1	1	1	1	1	1	1	15	1	1	1	1	N	1	1	1	1	1	1	1	1	1	1	1	15	1	1	1	1	1	1	1	1	1	1	1	1	1	1	1	1	1	1	1	1	1	1	1	1	1	1	1	1	1	1	3	1	1	1	1	1	1	1	1	1	1	1	1	1	1	1	1	1	1	1	1	1	1	1	1	1	1	1	1	1	1	1	1	1	1	1	1	1	1	1	6	1	1	1	1	1	1	1	1	6	1	1	N	6	1	1	1	1	1	1	1	16	1	1	1	1	1	1	1	1	1	N	1	1	1	N	1	1	1	1	1	1	1	1	1	1	1	1	1	1	1	1	1	1	1	1	1	1	1	1	1	1	1	1	1	1	1	6	1	1	1	16	25	15	16	1	N	20	N	15	17	15	15	16	16	18	15	14	1	15	16	2	10	1	1	1	1	1	1	1	1	1	1	1	1	1	1	1	1	1	1	1	1	1	N	1	1	6	N	6	1	1	1	1	1	1	1	1	1	1	1	1	1	1	1	1	1	1	1	1	1	1	1	1	1	1	1	1	1	1	1	1	1	1	1	1	1	1	1	1	1	1	1	1	1	1	1	1	1	1	6	1	1	1	1	32	1	1	1	1	1	1	1	1	1	N	1	1	1	1	1	1	1	1	16	1	1	1	1	1	1	1	1	1	1	1	1	1	1	1	1	1	1	6	1	46	1	1	1	1	N	1	1	1	1	1	1	1	1	1	1	1	1	1	1	6	1	1	1	1-	1	1	1	1	1	1	1	1	1	1	N	1	1	1	1	1	1	1	1	N	1	1	1	1	1	1	1	1	1	1	N	N	1	1	1	1	1	1	1	1	1	1	1	1	1	1	1	1	1	1	1	1	6	1	1	1	1	1	1	1	1	1	1	6	N	1	1	1	1	1	1	N	1	1	1	1	1	1	1	1	1	1	1	1	1	1	1	1	N	1	1	N	1	1	1	1	1	1	1	1	1	1	N	1	1	1	1	1	1	1	1	1	1	1	1	1	1	1	1	1	1	1	1	1	1	1	1	1	1	1	1	1	1	1	1	1	1	1	1	1	1	1	6	1	1	N	1	1	1	1	1	1	1	1	1	1	1	N	N	1	1	1	1	34	1-	1	1	1	1	1	1	1	1	1	1	1	1	1	1	1	1	13	1	1	1	1	1	1	1	1	1	1	1	1	1	1	35	1	1	1	1	1	1	1	1	1	1	1	1	1	1	1	1	1	1	1	1	1	1	1	1	1	1	1	1	1	1	6	1	1	1	1	1	1	1	1	1	N	1	1	1	1	1	47	1	1	1	1	1	1	1	1	N	1	10	1	24	1	1	1	1	1	1	1	1	1	N	1	1	1	1	1	1	8	1	1	1	1	1	1	1	1	1	N	1	1	1	6	1	1	1	1	1	1	1	1	1	1	1	1	1	1	1	1	1	1	1	1	1	1	1	1	1	1	1	1	1	1	1	1	1	1	1	1	1	1	1	1	1	1	1	1	1	1	1	1	1	1	1	1	1	1	1	1	1	N	1	438+	6	1	1	1	1	1	1	1	1	1	1	N	1	1	1	1	1	1	N	1	1	1	1	1	1	1	1	16	1	1	1	1	14	17	1	1	N	1	1	1	1	1	1	1	1	1	1	1	N	1	1	1	1	1	6	1	N	1	1	N	1	1	1	1	1	1	1	1	1	1	1	1	1	1	1	1	1	1	1	1	1	1	1	1	1	1	1	1	1	N	31	16	N	1	1	1	N	6	1	1	1	1	1	1	16	1	1	1	1	1	1	1	1	1	1	1	1	1	1	1	1	1	1	1	1	1	1	1	4	1	1	1	1	1	1	1	1	1	N	1	1	1	1	1	1	1	1	1	1	1	1	1	1	1	1	1	1	1	1	1	1	1	1	1	1	1	1	1	1	1	1	1	1	1	1	6	1	1	16	1	1	1	1	1	1	1	1	1	1	1	1	N	1	14	1	N	1	1	1	1	1	1	1	1	6	1	1	1	1	1	1	1	1	1	1	N	1	1	1	1	1	N	1	1	1	1	1	1	1	1	1	1	1	1	1	1	1	6	1	1	1	1	1	6	1	1-	1	1	N	1	1	1	N	1	1	1	1	1	1	1	1	1	1	1	1	1	1	1	1	15	N	1	N	1	1	6	1	1	1	1	1	1	1	1	1	1	1	1	1	1	6	1	1	1	1	1	1	1	1	1	1	1	1	1	1	1	1	1	1	N	1	1	1	1	1	1	1	1	1	1	1	1	44	1	1	1+	1	1	1	N	1	1	1	1	6	N	N	1	1	1	1	1	1	1	1	1	1	1	1	1	1	1	1	1	1	1	1	1	1	1	1	1	1	1	1	1	1	1	1	1	1	1	1	1	1	1	1	1	1	1	1	1	6	1	1	1	1	1	1	1	1	15	1	1	1	1	1	1	1	1	1	1	1	1	1	1	1	1	1	1	6	5	5	5	6	N	5	5	5	5	6	5	4	5	5	1	6	6	1	1	6	6	5	5	N	1	1	1	1	1	1	1	1	1	1	1	1	N	1	1	1	N	1	1	1	1	15	19	1	1	1	1	1	1	1	14	1	1	N	1	1	1	1	1	1	1	1+	33	1	N	6	1	1	1	1	1	1	1	1	1	1	1	1	N	1	1	1	1	1	1	1	1	1	1	1	1	1	1	1	1-	1	1	15	1	1	1	1	N	1	1	1	1	1	1	1	1	1	1	1	1	N	1	1	1	N	1	1	1	1	1	1	1	1	1	1	1	1	6	1	1	1	1	1	1	1	1	1	1	1	1	1	1	1	1	1	1	1	1	1	1	1	1	1	1	6	1	17	1	1	1	1	1	1	1	1	1	1	1	1	1	1	1	1	1	N	1	1	1	1	1	1	6	1	1	1	1	1	1	1	1	1	N	1	1	1	1	16	N	1	1	1	1	1	1	1	1	1	1	N	1	N	1	1	1	1	1	1	1	1	1	1	1	1	1	1	1	1	1	1	1	6	1	1	1	1	1	N	1	1	1	1	1	1	1	1	1	1	3	1	11	1	1	1	1	1	1	1	1	1	1	1	1	1	1	1	1	1	1	1	1	1	1	1	1	1	1	1	1	1	6	1	1	1	N	1	1	1	1	1	1	1	1	1	1	1	1	14	17	N	14	15	4	17	1	N	1	1	1	1	1	1	1	1	1	1	1	1	1	1	1	1	1	1	1	1	1	1	1	1	1	1	1	1	1	1	1	1	1	1	1	1	1	1	1	16	1	1	1	1	1	1	1	1	19	1	1	1	1	1	1	1	6	1	1	1	1	1	1	1	1	1	1	1	1	1	1	1	1	1	1	1	14	14	14	15	13	15	14	17	15+	13	12	14	15	0?	15	16	12	13	N	17	14	N	14	14	1	15	1	1	1	N	1	1	1	1	1	1	1	1	1	1-	1	1	1	1	1	1	1	1	1	1	1	1	1	1	1	1	1	N	1	1	1	1	1	1	1	1	1	1	1	1	1	1	1	N	1	1	1	1	1	1	1	1	1	1	1	1	1	1	1	1	1	3	1	1	1	1	1	1	1	1	3	1	1	1	1	1	1	1	1	1	1	1	1	1	1	1	1	1	N	1	1	1	1	1	1	1	N	1	1	1	1	1	1	1	1	1	1	1	1	1	1	1	14	14	5	N	16	14	13	15	15	11	27	14	16	14	18	14	16	N	13	2	3	10	14	10	10	16	15	15	15	15	15	12	13	14	6	13	14	15	18	1	13	4	1	8	12	10	10	12	11	9	4	1	14	7	1	9	14	11	14	20	6	6	3	6	6	N	6	6	6	6	6	6	6	14	1	5	6	1	N	6	6	5	6	6	6	6	6	6	6	6	6	6	6	N	6	6	6	6	6	6	6	6	6	6	48	6	6	6	6	16	6	17	6	6	6	6	6-	16	3	3	3	3	3	3	3	3	3	3	6	16	3	15	3	3	16	6	6	12	N	6	N	6	6	6	6	6	6	6	5	5	6	6	6	13	6	6	6	5	1	6	6	6	6	3	5	6	6	6	6	15	9	N	12	11	11	10	12	13	17	10	1	12	10	11	13	1	11	1	11	12	2	12-	12	12	12	5	12	13	N	12	12	12	11	11	7	1	12	12	11	1	3	11	12	12	11	12	12	12	12	11	10	16	12	12	12	20	11	10	N	12	11	12	11	10	7	8	10	12	N	12	10	2	11	7	N	9	1	N	12	12	12	12	11	11	11	N	5	12	12	11	12	12	11	11	11	11	10	16	3	10	10	12	12	12	6	12	12	12	12	11	0	0
GCA_000222245.2_ASM22224v2_genomic.fna	12	21	19	17	17	1	1	1	20	17	2	18	3	2	20	16	19	5	18	31	1	2	19+	21	2	21	24	12	18	19	2	5	19	9	6	8	22	10	12	10	19	10	12	11	10	11	12	9	5	20	28	26	20	19	6	26	24	23	1	24	20	43	24	22	14	14	14	13	12	12	13	13	11	11	22	6	6	6	6	6	6	6	6	6	6	6	6	6	6	6	6	6	5	6	5	6	6	6	6	5	6	5	6	5	5	6	6	6	5	6	6	6	3	5	1	1	2	5	2	6	4	6	6	6	5	6	6	6	6	6	5	6	6	N	6	6	4	6	6	6	6	5	5	5	6	6	5	6	5	6	6	6	6	6	5	6	1	1	1	1	13	1	1	1	1	6	6	5	5	5	6	4	1	1	1	6	1	1	1	1	1	1	1	1	1	1	1	1	1	1	1	1	1	1	1	6	4	1	1	1	1	1	1	1	1	1	1	1	1	1	115	1	1	1	1-	1	1	1	1	1	1	1	1	1	1	1	1	1	6	1	1	1	1	1	1	1	1	1	1	1	1	1	1	1	1	1	1	1	1	1	1	1	1	1	1	1	1	1	1	1	1	1	1	1	1	1	1	1	1	1	1	1	1	1	1	6	1	1	1	1	1	1	1	1	1	1	1	1	1	1	1	1	1	1	1	1	1	1	1	1	1	1	1	1	1	1	1	1	1	1	1	1	1	1	1	1	1	1	1	1	1	1	1	1	1	1	1	1	1	1	1	1	1	1	1	1	1	1	1	1	1	1	1	1	1	1	1	1	1	1	1	1	1	1	1	1	1	1	1	1	1	1	1	1	1	1	1	1	1	1	1	1	1	1	1	1	1	1	1	1	1	1	1	1	1	1	1	1	1	1	1	1	1	1	1	6	1	1	1	1	1	1	1	1	1	1	1	1	1	1	1	1	1	1	1	1	1	6	13	1	1	1	1	1	1	1	1	1	1	1	1	1	1	1	1	1	1	1	1	1	1	1	1	1	1	1	1	1	1	1	1	1	1	1	1	1	1	1	1	1	1	1	1	1	1	N	1	1	1	1	1	1	1	1	1	1	1	1	N	1	1	N	1	6	1	1	1	1	1	1	1	1	17	N	1	1	1	1	1	1	1	1	1	1	1	1	1	1	1	1	1	1	1	1	1	1	1	1	1	1	1	1	1	1	1	1	1	1	6	1	1	1	1	1	1	1	1	1	1	3	1	1	1	1	1	1	1	1	1	1	1	1	1	1	1	1	1	1	1	24	1	1	1	1	1	1	1	1	1	1	1	1	1	1	1	1	1	N	1	6	1	1	1	1	1	1	1-	1	6	1	1	N	6	1	1	1	1	1	1	1	1	24	1	1	1	1	1	1	1	1	1	1	1	1	1	1	1	1	1	1	1	1	1	1	1	1	1	1	1	1	1	1	1	1	N	1	1	1	1	1	1	1	1	1	1	1	6	1	19	1	12	11	11	12	10	12	13	13	11	12	11	11	11	13	13	1	1	1	1	1	1	1	1	1	1	1	1	1	1	1	1	1	1	1	1	1	1	1	1	1	1-	N	1	N	1	1	6	1	6	1	1	1	1	1	1	1	1	1	1	1	1	1	1	1	1	1	1	1	1	1	1	1	1	1	1	1	1	1	1	1	1	1	1	1	1	1	1	1	1	1	1	1	1	1	1	1	1	1	1	6	1	1	1	1	1	1	1	1	1	1	1	1	1	20	1	1	1	1	1	1	1	1	1	1	1	1	1	14	1	1	1	1	1	1	1	1	1	1	1	1	1	1	6	1	1	1	1	1	1	1-	1	1	1	1	1	1	1	1	1	1	1	1	1	1	6	1	1	1	1	1	1	1	1	1	1	1	1	1	1	1-	1	1	1	1	1	1	1	1	1	1	1	1	1	1	1	1	1	1	1	1	1	1	1	1	1	1	1	1	1	1	1	1	1	1	1	1	1	1	1	1	1	6	1	1	1	1	1	1	1	1	1	1	6	1	1	1	1	1	1	1	1	1	1	1	1	17	1	1	1	1	1	1	1	1	1	1	1	1	1	1	1	1	1	1	1	1	1	1	1	1	1	1	1	1	1	1	1	1	1	1	1	1	1	1	1	1	1	1	1	1	1	1	1	1	1	1	1	1	1	1	1	1	1	1	1	1	1	1	1	1	1	6	1	1	1	1	1	1	1	1	1	1	1	6	1	1	1	1	1	1	1	1	1	1	1	1	1	1	1	1	1	1	1	1	1	1	1	1	1	1	1	1	1	1	1	1	1	1	1	1	1	1	1	1	1	1	1	16	1	1	1	1	1	1	1	1	1	1	1	1	1	1	1	1	1	1	1	1	1	1	1	1	1	1	1	1	6	1	1	1	1	1	1	1	1	1	1	1	1	1	1	1	1	1	1	1	1	1	1	1	1	N	1	1	1	5	1	1	1	1	1	1	1	1	1	1	1	1	1	1	1	1	8	1	1	1	1	1	1	1	1	1	32	1	1	1	6	1	1	1	1	1	1	1	1	1	1	1	1	1	1	1	1	1	1	1	1	1	1	1	1	1	1	1	1	1	1	1	1	1	1	1	1	1	1	1	1	1	1	1	1	1	1	1	1	1	1	1	1	1	1	1	1	1	1	6	438+	6	1	1	1	1	1	1	1	1	1	1	1	1	1	1	1	1	1	1	1	1	1	1	1	1	1	1	1	1	1	1	1	1	1	1	1	1	1	1	1	62	1	0?	0?	0?	0?	1	1	1	15	1	1	1	1	6	1	1	1	1	1	1	1	1	1	1	1	1	1	1	1	1	1	1	1	1	1	1	1	1	1	1	1	1	1	1	1	1	1	1	1	1	1	1	1	1	1	1	6	1	1	1	1	1	1	1	1	1	1	1	1	1	1	1	1	1	14	1	1	1	1	1	1	1	1	1	1	1	1	1	1	6	1	1	1	1	1	1	1	1	1	1	1	1	1	1	N	1	1	1	N	1	1	1	16	1	1	1	1	1	N	1	1	1	1	1	1	1	1	1	1	1	1	1	1	1	6	1	1	1	1	1	1	1	1	1	1	1	1	1	1	1	1	1	1	1	6	1	1	1	1	1	1	1	1	6	1	1	1	1	1	1	1	1	1	1	1	1	1	1	1	1	1	1	1	1	1	1	1	1	1	1	1	1	1	1	1	1	6	1	1	1	1	1	6	1	1	1	1	1	1	1	1	1	1	1	1	N	1	1	1	1	1	1	1	1	1	1	1	1	1	1	1	N	1	1	6	1	1	1	1	1	1	1	1	1	1	1	1	1	1	6	1	1	1	1	1	1	1	1	1	1	1	1	1	90	1	1	1	1	1	1	1	1	1	1	1	1	1	1	1	1	1	1	1	1	1+	1	1	1	N	1	1	17	1	6	1	1	1	1	1	3	1	1	1	1	1	1	1	1	1	1	1	1	1	1	1	1	1	1	1	1	1	1	1	1	1	1	1	1	1	1	1	1	1	1	1	1	1	6	1	1	1	6	1	1	1	1	1	1	1	1	1	1	1	1	1	1	1	1	1	1	1	1	1	1	1	1	1	1	1	6	5	5	5	6	5	5	5	5	5-	6	5	4	5	5	1	6	6	1	1	N	6	5	5	5	1	1	1	1	1	1	1	23	1	1	1	1	1	1	1	1	1	1	1	1	1	1	1	1	1	1	1	1	1	1	1	1	1	1	1	1	1	1	1	1	1	1+	1	1	1	18	22	1	1	1	1	1	N	1	1	1	1	1	5	1	1	1	1	1	1	1	1	1	1	1	1	1	1	1	1	1	1	1	1	1	1	1	1	1	1	N	1	1	1	1	1	1	1	1	1	1	1	1	1	1	1	1	1	1	1	1	1	1	1	1	1	1	6	1	47	1	1	1	1	1	1	1	1	1	1	1	1	1	1	1	1	1	1	1	1	1	1	1	1	6	1	1	1	1	1	1	1	1	1	1	1	1	1	1	1	1	1	1	1	N	1	1	1	1	1	1	6	1	1	1	1	1	1	1	1	1	1	1	1	1	1	1	N	1	1	1	1	1	1	1	1	1	1	1	6	1	1	1	1	1	1	1	1	1	1	1	1	1	1	1	1	1	1	1	1	6	1	1	1	1	1	N	1	1	1	1	1	1	1	1	1	1	1	1	1	1	1	1	1	1	1	1	1	1	1	1	1	1	1	1	1	1	1	1	1	1	1	1	1	1	1	1	1	1	6	1	1	1	1-	1	1	1	1	1	1	1	1	1	1	1	1	1	1	1	1	1	1	1	1	1	1	1	1	1	1	1	1	1	1	1	1	1	1	1	1	1	1	1	1	1	1	1	1	1	1	1	1	1	1	1	1	1	1	1	1	1	1	1	1	1	1	1	1	1	1	1	1	1	1	1	1	1	1	1	1	1	6	1	1	1	1	1	1	1	1	1	1	1	1	1	1	1	1	1	1	1	1	1	1	1	1	1	1	6	1	1	1	1	1	1	1	1	4	1	1	1	1	1	1	1	1	1	1	1	1	1	1	1	1	1	1	1	1	1	1	6	1	1	1	1	1	1	1	1	1	1	1	1	1	1	1	1	1	1	1	1	1	1	1	1	1	1	1	1	1	1	1	1	1	1	1	1	1	1	1	1	1	1	1	1	1	1	1	1	1	1	1	3	1	1	1	1	1	1	1	1	3	1	1	1	1	1	1	1	1	1	1	1	N	1	1	1	1	1	1	1	1	1	1	1	1	1	1	1	1	1	1	1	1	1	1	1	1	1	1	1	1	1	1	1	1	1	1	1	1	1	1	1	1	1	1	1	1	1	1	1	1	1	3	1	1	1	1	1	1	1	1	1	1	1	1	1	1	N	1	6	1	9	1	1	1	1	6	6	6	6	6	6	9	2	6	1	2	5	1	1	1	106	6	6	3	6	6	6	6	6	45	6	6	6	6	14	1	5	6-	1	6	6	6	5	6	6	6	6	6	6	6	6	21	6	6	6	6	6	6	6	6	6	6	6	6	6	6	6	6	6	6	6	6	6	6	6	6	6	6	6	3	3	3	3	3	3	3	3	3	3	6	3	3	3	3	6	3	6	6	12	154	6	4	6	6	6	6	6	6	6	5	5	6	6	6	13	6	6	6	5	1	6	6	6	6	3	5	6	6	6	6	6	4	6	6	6	4	5	6	6	6	5	3	6	5	6	6	6	6	6	6	6	6	6	6	6	6	6	6	6	6	6	6	160+	6	23	11	1	23	19	19	1	3	21	20	20	18	25	21	13	154	20	18	20	21	21	19	23	14	16	17	20	17	23	17	11	3	10	1	18	18	17	14	2	16	11	20	2	1	18	20	19	22	27	16	18	15	N	1	20	26	16	22	18	17	4	4	4	19	21	6	17	5	19	21	17-	9	19	18	19	22	18	0	0
GCA_000222265.2_ASM22226v2_genomic.fna	10	68	16	15	14	1	1	1	16	17	2	15	1	13	16	14	16	16	15	18	11	2	16	17	10	17	16	2	14	15	2	3	14	5	1	26	16	14	16	14	233-	14	17	17	N	16	19	13	6	16	18	17	16	12	13	15	15	15	3	5	5	4	14	5	14	14	14	13	12	12	13	13	11	11	11	12	12	13	13	13	13	13	8	14	14	72	14	14	15-	14	18	6	5	6	5	6	6	6-	6	5	6	5	6	5	5	6	6	6	5	6	6	6	3	5	1	1	2	11	2	6	4	6	6	6	11	11	13	10	12	12	7	10	12	N	12	12	112-	9	7	13	12	9	7	11	12	12	11	11	8	11	N	6	6	6-	5	6	1	1	1	1	13	1	1	1	1	6	6	5	5-	5	6	4	1	1	1	1	1	1	1	1	1	1	1	N	1	1	1	1	1	1	1	1	1	1	1	6	1	1	1	1	1	1	1	1	1	1	1	1	1	1	1	1	1	1	1	1	1-	1	1	1	1	1	1	1	1	1	1	1	6	1	1	N	1	1	1	1	1	38	1	1	N	1	35	1	1	1	1	1	1	1	1	1	1	1	1	1	1	1	1	1	1	1	N	1	1	1	1	1	1	1	1	1	1	1	1	6	1	1	1	1	1	1	1	1	1	1	1	1	1	1	1	1	1	1	1	1	1	1	1	1	1	1	1	1	1	1	1	1	1	1	1	0?	1	1	1	1	1-	1	1	1	1	42	1	1	1	1	1	1	1	1	1	1	1	1	1	1	1	1	1	1	1	1	1	1	1	1	1	1	1	1	1	1	1	1	1	1	1	1	1	1	1	1	1	1	1	1	1	1	1	1	1	1	1	1	16	1	1	1	1	1	1	1	1	43	1	1	1	1	1	1	1	1	1	1	1	6	1	1	1	1	1	1	1	1	1	1	1	1	1	1	1	1	1	1	1	1	1	6	13	1	1	1	1	1	1	1	1	1	1	1	1	1	1	N	1	1	1	1	1	1	1	1	1	1	1	1	1	1	1	1	1	1	N	1	1	1	1	1	1	34	1	1	1	1	1	1	1	1	1	1	1	15	1	1	1	1	1	N	1	1	1	1	1	6	1-	1	1	1	1	1	1	1	1	1	1	1	1	1	1	1	1	1	1	1	1	1	1	1	1	1	1	1	1	1	1	51	1	1	1	1	1	1	1	1	1	1	1	1	6	1	1	1	1	1	17	1	1	1	1	3	1	1	1-	1	1	1	1	1	1	1	36	1	1	1	1	1	1	1	1	1	1	1	1	1	1	1	1	1	1	1	1	1	1	1	1	1	1	1	1	6	1	1	1	1	1	1	1	1	6	1	1	1	6-	1	1	1	1	1	45	16	1	1	1	1	1	1	1	1	1	1	1	1	1	1	1	1	1	0?	1	1	1	1	1	1	N	1	1	1	1	1	1	1	1	1	1	1	1	1	1	1	1	1	1	1	1	1	6	108-	1	8	8-	8	8	14	13	9	9	9	8	8	16	16	19	17	9	16	15	2	17	17	12	1	16	16	6	15	10	5	5	11	17	18	19	1	1	1	1	1	1	1	1	1	1	1	1	1	6	1	6	1	1	1	1	1	1	1	1	1	1	1	1	1	1	1	1	1	1	1	1	1	1	N	1	1	1	1-	1	1	1	1	1	1	1	1	1	1	1	1	1	1	1	1	1	1	1	1	1	1	1	6	1	191-	1	1	1	1	1	N	1	1	1	1	1	1	1	1	50	1	1	15	1	1	1	1	1	1	1	14	1	1	1	1	1	1	1	1	1	1	1	65	1	1	6	1	1	1	1	1	0?	1	1	1	1	1	1	1	1	1	0?	1	1	1	1	1	6	1	1	30	1	1	1	1	1	1	1	1	1	1	1	1	1	1	1	1	1	1	1	1	1	1-	1	1	1	1	1	1	1	1-	1	1	1	1	1	1	1	1	1	1	46	1	1	1	1	1	1	1	1	1	1	1	1	6	1	1	1	1	1	15	1	1	1	1	6	N	1	1	1	1	1	1	200-	1	1	1	1	1	1	1	1	1	1	1	1	1	1	107-	1	1	1	1	1	1	1	1-	1	1	1	1	1	1	1	1	1-	1	1	1	1	1	1	1	1	1	1	1	1	1	1	1	86	1	1	1	1	1	1	1	1	N	1	1	1	1	1	1-	1	1	1	1	1-	1	1	6	1	1	1	16	1	1	1	1	1	1	1	1	1	1	1	1	1	1	1	1	1	1-	1	1	N	1	1	1	1	N	10	1	1	42	1	1	1	1	13	1	1	1	1	1	1	1	1	1	1	1	1	1	1	1	1	1	1	N	1	1	1	1	16	1	1	1	1	1	1	N	1	1	1	1	1	1	1	1	1	1	1	1	1	1	6	1	1	1	1	1	1	1	1	1	1	1	N	1	1	1	1	1	1	1	1	1	1	1	1	1	1	1	N	5	1	1	1	1	1	1	1	1	1	1	1	196-	1	1	1	1	8	1	1	1	1	1	1	1	1	1	33	1	1	1	6	N	1	1	1	1	1	1	1	1	1	1	1	1	1	1	1	1	1	1	1	1	1	1	1	1	1	1	1	1	1	1	1	1	1	1	1	1	1	1	1	1	1	1	1-	1	1	1	207-	1	1	1	1	1	1	1	1	1	1	6	438+	6	1	1	324-	1	43	1	1	1	1	1	1	1	1	1	1	1	1	1	1	1	1	1	1	1	1	1	1	1	1	1	1	1	1	1	1	1	1	1	1	1	31-	1	1	1	1	N	1	35	50	1	N	1	1	6	1	1	1	1	1	1	1	1-	0?	1	1	1	1	1	1	1	1	1	1	1	1	1-	1	1	16	1	1	1	1	1	1	1	1	1	1	1	1	N	1	1	1	1	6	1	1	1	65-	1	1	1	1	1	1	1	1	1	1	1	1	1	1	1	1	1	1	1	1	1	1	1	1	1	1	1	1	1	1	1	1	1	1	1	1	1	1	1	1	1	1	1	1	N	31	1	1	1	1	1	1	1	1	1	1	1	1	1	1	1	1	1	1	34	1	1	36	1	1	1	1	1	6	1	1	1	1	1	1	15	1	N	1	1	1	1	1	1	1	1	1	1	6	1	1	1	1	1	1	1-	1	6	1	16	1	1	1	1	1	1	0?	1	1	1	1	1	1	1	1	1	1	1	1	1	1	1	1	1	1	1	1	1	1	1	6	1	1	1	1	1	6	N	1	1	1	1	1	1	1	1	1	1	1	1	1	1	1	1	1	1	1	1	1	1	1	1	1	1	29	1	1	1	6	1	1	1	1	1	1	1	38	1	1	1	1	1	1	6	1	1	1	1	1	1	1	1	1	1	1	1	1	77	1	1	1-	1	1	1	1	1	1	1	1	1	1	1	1	1	1	1	N	1	1+	1	1	1	1	1	1	1	1	6	1	N	1	1	1	1	1	1	1	13	1	1	1	1	1	1	1	1-	1	1	1	1	1	1	1	1	1	1	1	1	1	1	1	1	1	1	1	34	1	1	1	1	1	6	1	1	1	6	N	1	1	1	1	1	1	1	1	1	1	1	1	1	1	N	1	1	1	1	1	1	1	1	1	1	1	6	5	5	5	6	5	5-	5	5	5	6	5	4	5	5	1	6	6	1	1	43-	6	5	5	5	1	1	1	1	1	1	15	1	1	1	1	1	1	1	63	1	1	1	1	1	1	1	1	1	1	1	1	1	1	1	1	1	1	N	1	1	1	1	1	1	1	1+	1	1	1	6	1	1	1	1	1	1	1	1	1	1	1	1	17	1	1	1	1	1	1	1	1	1	1	1	1	1	1	1	1	1	1	1	1	1	1	1	1	1	1	33-	1	1	1	1	1	1	1	1	1	1	1	1	1	1	1	1	1	1	1	1	1	1	1-	1	16	1	6	1	1	1	1	1	1	1	1	1-	1	1	1	1	1	1	1	1	1	1	1	1	1	1	1	1	1	6	1	1	1	1	1	1	1	1	1	1	1	1	1	1	1	1	1	1	1	1	N	1	16	1	1	1	N	1	1	1	1	1	1	1	1	1	1	31-	1	1	1	1	6	1	1	1	1	1	N	1	N	1	1	1	1	1	1-	1	1	1	1	1	1	1	1	1	1	1-	1	1	1	1	1	1	1	6-	1	1	1	1	1	1	1	1	1	1	1	1	1	1	1	1	1	1	1	1	1	1	1	1	1	1	1	1	1	1	1	1	1	1	1	1	1	1	1	1	1	1	1	1	1	1	1	1	6	1	1	1	1	1	1	1	1	1	1	1	1	1	1	1	1	1	1	396-	1	68	1	1	1	1-	1	1	1	1	1	1	1	1	1	1	1	1	1	1	1	1	1	1	1	1	1	1	1	1	1	1	1	1	1	1	1	1	1	1	1	1	1	1	1	1	1	1	1	1	1	1	1	1	1	1	1	N	1	N	1	1	6	1	1	1	1	1	1	N	1	1	1	1	1	1	1	1	1	1	1	1	1	1	1	1	1	1	1	6	1	1	1	1	1	1	1	1	4	1	1	1-	1	1	1	1	1	1	1	1	1	1	1	1	1	1	1	N	1	1	1	1-	1	1	1	1	N	1	1	1	1	1	1	1	1	1	1	1	1	1	1	1	1	1	1	1	1	1	1	1	1	1	1	1	1	1	1	1	1	1	1	16	1	1	1	1	1	1	1	1	1	1	1	3	1	1	1	1	1	1	1	1	3	1	1	1	1	1	1	1	1	1	1	1	1	1	1	1	1	1	1	1	1	1	1	1	1	1	1	1	1	1	1	1	N	1	1	1	1	1	1	1	1	N	1	1	1	1	1	1	1	1	1	1	1	1	1	37	1	1	1	1	1	1	3	1	1	N	1	51	1	1	1	1	1	1	33	1	1	1	1	6	1	1	1	133-	1	1	6	6	6	6	6	6	9	2	6	1	2	5	1	1	1	1	1	1	1	1	13	1	1	1	1	1	1	1	1	58	1	1	1	1	N	1-	1	1	1	1	1	1	N	1	1	1	N	1	1	1	1	1	1	1	1-	1	1	1	1	1	1	1	1	1-	N	1	1	1	1	1	1	1	1	1	1	1	1	12	1	1	1	1	N	1	1	1	1	1	1	N	1	1	1	1	1	1	32	1	1	1	1	1	1	1	1	1	1	1	1	14	1	1	1	90-	1	N	53	1	1	1	1	1	1	1	1	1	1	1	1	1	1-	30-	1	1-	1	1	1	1	1	1	1	1	1	1	1	13	1	1	1	13	1	1	1	1	1	1	1	1	1	1	1	1	1-	1	1	1	1	1	1	1	1	1	1	1	N	1	1	1	1	1	1	1	1	1	1	1	1-	13	1	1	1	1	1	1-	43	1	1	1	1	1	1	1	1	1	1	1	1	1	12	1	1	1	1	1	1	1	1	1	1	1	1-	1	1	1	1	24	13	16	17	N	5	16	16	16	17	15	0	0
GCA_000222285.2_ASM22228v2_genomic.fna	2	18	11	11	11	1	1	N	12	12	1	11	2	10	12	11	12	12	11	12	10	8	12+	12	6	19	19	10	16	17	2	13	16	14	6	8	19	17	19	16	14	17	20	20	19	19	22	9	5	5	12	12	11	5	11	12	12	12	8	25	21	72	10	10	21	27	24	27	26	20	22	22	23	16	17	16	16	19	13	13	18	18	8	14	19	13	14	14	15	14	18	16	13	8	13	12	15	18	5	13	15	14	12	11	13	17	16	16	17	15	16	13	3	5	1	1	1	1	1	1	1	1	1	1	1	1	1	1	1	1	1	1	1	10	15	1	1	1	1	1	1	1	1	1	1	1	2	1	1	1	N	21	1	1	1	1	1	1	1	1	13	1	1	1	1	6	6	5	5	5	6	4	1	1	1	1	1	1	1	1	1	1	1	1	1	1	1	1	1	1	1	1	1	1	1	6	1	1	1	1	1	1	1	1	1	1	1	1	1	1	1	1	1	1	1	1	1	20	1	1	1	1	1	1	1	1	1	1	6	1	1	1	1	1	1	1	1	1	1	1	1	1	1	1	1	1	1	83	1	1	1	1	1	1	1	1	1	1	1	1	1	1	1	1	1	1	1	1	1	1	1	1	1	1	1	6	1	1	1	1	1	1	1	1	1	1	1	1	1	1	1	1	1	1	1	1	1	15	1	1	1	1	1	1	1	1	1	1	1	1	1	1	1	1	1	1	1	1	1	1	1	1	1	1	1	1	1	1	1	1	13	1	1	1	1	1	1	1	1	1	1	1	1	1	1	1	1	1	1	1	1	1	1	1	1	1	1	1	54	25	14	1	N	39	20	1	18	26	1	1	1	1	1	1	61	1	1	1	1	1	1	1	1	1	1	1	1	1	1	1	1	1	1	1	1	6	1	1	1	1	1	1	N	17	1	1	1	1	1	1	1	1	1	1	1	1	1	6	13	1	1	1	1	1	1	1	1	1	1	1	1	1	1	1	1	1	1	1	1	1	1	1	1	1	1	1	1	1	N	1	1	1	1	1	1	1	1	1	1	1	N	1	1	1	1	1	1	1	1	1	1	1	N	1	1	1	1	1	N	1	1	1	1	N	1	1	1	1	1	1	1	15	1	1	N	1	N	1	1	1	1	1	1	1	1	1	1	48	15	1	1	1	1	1	1	1	1	1	1	1	1	1	1	1	1	1	1	1	1	1	1	1	1	1	1	1	1	1	1	3	1	1	1	1	1	1	1	1	1	1	1	1	1	1	1	1	1	1	1	1	1	1	1	57	19	19	17	3	12	16	2	1	1	16	9	1	1	77	1	40	26	14	1	14	1	1	1	1	6	1	1	1	6	1	1	1	1	1	1	1	16	1	1	1	1	1	1	1	1	1	1	1	1	1	1	1	1	1	1	1	1	N	1	N	1	1	1	1	1	1	N	1	1	1	1	1	1	1	1	1	1	1	1	1	1	1	6	1	1	1	12	11	53	16	1	16	37	17	19	17	15	15	52	16	29	40	14	1	15	16	2	10	59	19	6	1	1	1	N	1	1	1	1	1	1	1	1	1	1	1	1	1	1	1	1	1	6	1	6	1	1	1	1	1	1	1	1	1	1	1	1	1	1	1	1	1	1	1	1	1	1	1	1	1	1	1	1	1	1	1	1	1	1	1	1	1	1	1	1	1	1	1	1	1	1	1	1	N	1	6	1	1	1	1	1	1	1	1	1	1	1	1-	1	1	1	1	1	1	1	1	0?	0?	N	16	1	1	1	1	1	1	1	1	38	1	1	1	1	1	1	1	1	1	6	1	1	1	1	1	1	N	1	1	1	1	1	1	1	1	1	1	1	1	1	1	6	1	1	1	13+	N	1	1	1	1	1	1	1	1	1	1	1	1	1	1	1	1	1	1	1	1	1	1	1	1	1	1	1	1	N	1	1	1	1	1	1	1	1	1	1	1	1	1	1	1	1	1	1	1	1	1	1	6	1	1	1	1	1	1	1	1	1	1	6	1	1	1	1	1	1	1	1	1	1	1	1	1	1	1	1	1	1	1	1	1	N	1	1	0?	1	1	1	1	1	1	1	1	1	1	1	1	1	1	1	1	1	1	1	1	1	1	1	1	1	1	1	1	1	1	1	1	1	1	1	1	1	1	1	1	1	1	1	1	1	1	1	1	1	1	1	1	1	6	1	1	1	1	1	1	1	1	1	1	1	1	1	1	1	1	1	1	1	N	1	204-	1	1	1	1	1	1	1	1	1	1	1	1	1	1	1	1	13	1	1	1	1	1	1	1	1	1	1	1	1	1	1	1	1	1	1	1	1	1	1	1	1	1	1	1	1	1	1	1	1	1	1	1	1	1	1	1	1	1	1	1	1	1	6	1	1	1	1	1	1	1	1	1	N	1	1	1	1	1	1	1	1	1	1	1	1	1	1	1	1	10	1	1	1	1	1	1	1	1	1	N	1	1	N	1	1	1	1	1	8	1	1	1	1	1	1	1	1	1	1	1	1	1	6	1	1	1	1	1	1	1	1	1	1	1	1	1	1	1	1	1	1	1	1	1	1	1	1	1	1	1	1	1	1	1	1	1	N	1	1	1	1	1	1	1	1	1	1	1	1	1	1	1	1	1	1	1	1	1	1	1-	1	1	438+	6	1	1	1	1	1	1	N	1	1	1	N	1	1	N	1	1	1	1	1	1	1	1	1	1	1	1	16	68-	N	1	1	14	1	1	1	1	1	1	1	1	1	1	1	1	1	1	1	N	N	1	1	1	1	6	1	1	1	N	N	1	1	1	1	1	1	1	1	1	1	1	1	1	59	1	1	1	1	1	1	1	1	1	1	1	1	1	1	1	1	1	16	N	1	1	1	1	6	1	1	1	1	1	1	16	1	1	N	1	1	1	1	1	1	1	1	1	1	1	1	1	1	1	1	1	1	1	1	1	1	1	1	1	1	1	1-	1	1	1	1	1	1	1	1	1	N	1	1	1	1	1	1	39	1	1	1	1	1	1	1	1	1	1	1	1	1	1	1	1	1	1	1	1	1	1	6	1	1	16	1	1	1	1	1	1	1	1	1	1	1	1	1	1	0?	1	6	1	1	1	1	1	1	1	1	6	1	1	1	1	1	1	1	1	1	1	1	1	1	1	1	1	1	1	1	1	1	1	1	1	1	1	1	1	1	1	1	1	6	1	1	1	1	N	6	1	1-	1	1	N	1	1	1	1	1	1	1	N	1	1	1	1	1	1	1	1	1	1	1	1	15	N	1	1	1	1	6	1	1	15	1	1	1	1	1	1	1	N	1	1	1	6	1	1	1	1	1	1	1	1	1	1	1	1	1	1	1	1	1	1	1	1	1	1	1	1	1	1	1	1	N	1	1	1	1	1	1+	1	1	1	1	1	1	1	1	6	1	1	1	N	1	1	1	1	1	1	1	1	1	1	1	1	1	1	1	1	1	1	1	1	1	1	1	1	1	1	1	1	1	1	1	N	1	1	1	1	1	1	1	1	1	1	1	6	1	1	1	1	1	1	1	1	15	1	1	1	1	1	1	1	1	1	1	1	25	1	1	1	1	1	1	6	5	5	5	6	5	5	5	5	5	6	5	4	5	5	1	6	6	1	1	6	6	5	5	5	N	1	1	1	1	N	1	N	1	1	1	1	1	1	1	1	1	1-	1	1	1	15	19	1	1	1	1	1	1	1	14	1	1	1	1	1	1	1	1	1	1	1+	1	1	1	6	1	1	1	1	1	1	1	1	1	1	1	1	1	1	1	1	1	1	1	1	1	1	1	1	1	1	1	1	51	1	1	15	1	N	1	1	1	1	1	N	1	1	1	1	1	1	1	1	1	1	1	1	1	1	1	1	1	1	1	1	1	1	1	1	1	1	6	N	1	1	1	1	1	1	1	1	1	1	1	1	1	1	1	1	1	1	1	1	1	1	1	1	1	6	1	1	1	1	1	1	1	1	1	1	1	1	1	1	1	1	39	1	1	1	1	1	1	1	1	1	6	1	1	1	1	1	1	1	1	1	1	1	1	1	1	16	6	1	1	1	1	1	1	1	1	1	1	N	1	N	1	1	1	1	1	1	1	1	1	1	1	1	1	1	1	1	1	1	1	80	4	8	15	14	20	17	22	17	30	16	17	17	19	56	1	1	3	1	11	1	1	1	1	1	1	1	1	1	1	1	1	1	1	1	1	1	1	1	1	1	1	1	1	1	1	1	1	1	6	1	1	1	N	1	1	1	1	1	1	1	1	1	1	1	1	14	17	15	14	15	4	17	1	1	1	1	1	1	N	1	1	1	1	1	1	1	1	1	1	1	1	1	1	1	1	1	1	1-	1	1	1	1	1	N	1	1	1	1	1	1	1	1	1	16	1	1	1	1	1	1	1	1	19	1	1	1	1	1	1	1	6	1	1	1	1	1	1	1	1	1	1	1	1	1	1	1	1	1	1	1	1	1	1	1	1	1	1	6	1	37	4	7	53	0?	20	62	12	13	N	86	N	15	14	14	1	25	17	56	N	1	1	1	1	1	1	1	1	1	1	1-	1	1	1	1	1	1	1	1	1	1	1	1	1	1	1	1	1	1	1	1	1	1	1	1	1	1	1	1	1	1	1	1	1	1	1	1	1	1	1	1	1	1	1	1	1	1	1	1	1	1	1	3	1	1	1	1	1	1	1	1	3	1	1	1	1	1	1	1	1	1	1	1	1	1	1	1	1	1	1	1	1	1	1	1	1	1	1	1	1	1	1	1	1	1	1	1	1	1	1	1	1	1	14	14	5	14	16	14	13	15	15	11	14	14	16	14	18	14	16	15	13	2	3	10	14	10	10	16	15	15	15	15	15	12	13	14	6	13	14	15	18	1	13	4	1	8	12	10	10	5	11	9	4	1	14	7	1	9	14	11	14	20	6	6	3	6	6	6	6	6	6	6	6	6	6	14	1	5	6	1	6	6	6	5	6	6	6	6	6	6	6	6	6	6	6	6	6	6	6	6	6	6	6	6	6	6	6	6	6	6	6	50	6	17	6	6	6	6	6-	16	3	3	3	3	3	3	3	3	3	3	6	16	3	15	3	68	16	6	6	12	N	6	4	6	6	6	6	6	6	6	5	5	6	6	6	13	6	6	6	5	1	6	6	6	6	3	5	6	6	6	6	15	9	N	12	11	11	10	12	13	17	10	1	12	10	11	13	1	11	1	11	12	2	12-	12	12	12	5	12	13	18	54	12	12-	11	11	7	1	12	12	11	1	3	11	12	12	11	12	12	12	12	11	10	16	12	12	12	20	11	10	12	12	11	12	11	10	7	8	10	12	11	12	10	2	11	7	12	9	1	13	12	12	12	12	11	11	11	N	5	12	12	11	12	12	11	11	11	11	10	N	3	10	10	12	12	12	6	12	12	12	12	11	0	0
GCA_000241665.2_ASM24166v2_genomic.fna	6	9	4	4	4	2	1	1	9	9	1	N	4	8	9	8	9	9	9	9	5	7	9	9	1	9	9	2	3	9	2	3	4	4	6	6	10	1	10	7	6	35	45	57	9	49	13	10	5	12	13	13	12	N	1	13	13	49	13	54	45	179	49	50	52	12	12	11	13	11	12	12	12	7	12	11	11	12	12	12	12	12	11	12	N	9	9	9	N	9	9	9	8	9	8	4	9	9	9	8	9	8	3	7	8	9	9	9	8	4	4	4	3	3	1	1	2	8	2	9	1	N	1	9	8	9	10	3	9	9	3	8	N	4-	9	9	7	9	9	10	9	2	8	8	9	43	8	9	7	9	9	9	9	9	8	4	1	3	9	8	9	8	9	3	8	N	9	8	8	8	9	7	8	9	9	9	3	8	8	N	8	9	1	8	3	8	40	8	8	7	8	8	8	8	8	9	1	5	7	8	8	7	8	8	1	1	2	2	1	1	9	9	1	8	6	9	N	4	6	8	8	38-	N	8	4	7	8	7	9	8	4	N	8	8	8	9	9	N	1	9	9	9	8	9	9	9	8	8	6	7	9	7	8	6	N	8	9	8	8	8	8	4	8	8	N	8	8	9	1	8	8	9	8	8	9	N	8	9	3	7	9	7	4	8	7	8	8	9	2	4	4	4	4	7	8	8	4	6	1	4	4	4	8	8	4	8	8	9	8-	8	8	8	1	8	8	1	8	2	8	1	8	8	N	N	9	8	9	8	N	8	4	8	1	8	N	5	N	8	7	9	7	7	6	2	8	1	1	8	8	7	8	4	8	8	8	3	8	8	8	8	5	1	N	6	8	6	8	8	8	8	8	8	8	8	8	8	8	7	8	7	49	8	8	8	8	8	8	N	3	1	N	7	8	8	N	9	7	2	5	8	8	8	N	8	8	8	8	8	8	8	8	4	8	8	N	8	9	9	9	38	7	N	8	7	9	8	1	8	6	8	N	8	4	N	N	4	4	8	8	2	2	26	1	8	8	8	1	4	N	8	1	1	8	8	48	5	8	1	8	8	N	8	8	8	6	N	7	8	6	9	9	8	N	1	8	8	8	8	N	9	5	6	6	N	6	8	9	9	6	8	6	9	9	10	9	9	N	9	7	9	8	8	8	N	8	8	8	8	8	1	8	3	8	14	6	8	2	1	9	7	7	8	8	4	8	6	8	6	9	7	7	8	8	1	8	1	8	8	7	N	8	8	8	8	8	8	7	8	8	8	N	8	8	8	8	N	9	8	3	8	8	8	N	8	9	8	8	3	3	4	4	1	1	4	4	3	3	N	8	9	8	8	7	7	1	6	4	3	4	4	4	8	9	8	8	6	3	8	8	9	9	8	8	8	8	8	4	8	39	3	N	N	8	8	8	8	8	9	8	6	2	N	27	8	8	6	8	7	8	9	7	8	9	8	1	6	N	1	8	9	8	8	9	8	8	9	6	8	8	8	8	8	8	9	7	9	9	9	8	8	8	8	8	9	9	8	7	5	8	8	8	1	8	N	6	8	8	7	8	8	9	8	9	8	7	9	7	7	8	9	8	N	6	22	9	8	10	N	N	8	8	8	8	8	8	8	6	4	8	N	7	4	1	3	8	6	4	37	6	8	9	N	8	34	8	2	8	6	3	8	8	10	9	8	8	9	8	9	9	9	9	9	8	8	8	8	4	4	8	9	5	7	8	8	8	7	7	N	8	9	8	151-	8	8	8	N	8	8	8	8	8	9	4	8	4	4	4	4	1	8	8	N	8	8	7	26	8	5	8	8	8	7	9	7	7	N	8	8	8	8	8	3	6	N	5	5	N	8	8	8	8	8	8	6	9	4	8	7	3	3	3	8	2	2	6	4	8	8-	6	N	56	8	8	8	8	8	2	8	8	9	8	8	7	8	2	32	9	9	7	8	4	7	7	8	4	4	8	8	8	8	9	8	8	8	8	8	8	8	8	9	9	9	8	8	8	9	8	8	8	13	8	8	9	7	8	8	N	7	8	8	8	8	8	8	8	8	8	N	8	8	3	N	8	2	N	9	8	N	5	8	8	7	8	9	4	3	4	9	8	8	4	N	8	8	7	7	8	8	8	8	8	9	8	8	8	8	9	N	8	7	9	8	1	7	7	8	8	8	8	8	8	7	8	8	8	8	1	6	8	8	8	9	9	3	29	9	8	7	8	8	8	9	8	2	7	6	8	8	7	1	7	5	8	N	7	8	8	N	8	6	8	6-	5-	8	8	8	9	7	23	8	40	8	8	7	8	8	8	8	4	1	9	3	9	N	9	10	3	3	7	40	6	10	3	9	9	8	9	7	5	N	8	9	9	8	8	9	34	3	6	9	N	8	1	8	8	9	10	9	9	9	8	9	9	4	9	9	N	9	9	8	6	6	9	8	9	7	9	9	1	9	2	N	9	1	9	2	8	N	3	5	8	9	1	8	N	1	N	2	9	52	9	8	8	9	9	19	47	43	9	8	N	9	2	8	9	8	9	9	8	10	8	N	8	8	8	7	5	2	4	7	4	4	7	1	4	6	6	8	5	4	7	6	8	9	9	9	8	8	8	9	9	9	9	9	9	9	9	9	9	N	9	9	9	9	9	9	8	8	9	34	3	3	8	2	N	9	8	N	8	8	8	8	7	8	8	8	8	8	N	8	3	9	7	9	8	8	8	8	7	8	N	8	8	8	8	1	7	N	4	4	9	7	8	8	8	8	9	7	8	8	8	8	8	N	N	8	8	8	38	8	9	9	8	8	8	8	8	8	8	9	8	8	8	8	8	8	8	N	8	3	9	8	6	7	7	7	8	8	8	8	8	8	7	8	N	8	N	8	8	N	9	6	8	8	9	8	7	8	8	8	8	8	8	2	8	2	8	8	3	4	8	7	7	5	4	1	2	8	8	1	8	9	8	8	8	2	7	9	9	6	5	8	5	8	8	8	9	9	8	7	7	2	N	8	7	N	7	7	3	N	8	8	8	7	7	4	8	8	4	7	2	8	8	8	3	8	8	6	8	8	9	3	10	8	8	8	7	9	9	8	5	7	8	4	4	1	8	2	8	8	N	N	N	9	8	8	7	8	8	8	8	9	1	8	8	8	8	5	9	4	8	4	4	3	7	3	7	8	8	1	7	N	N	8	7	6	7	8	8	115	7	8	9	7	9	8	8	8	8	8	9	8	8	8	4	8	7	3	13	8	2	7	4	N	8	8	1	8	1	8	8	6	N	9	9	8	7	8	8	N	8	4	9	9	8	3	4	8	8	7	8	8	8	8	14	N	4	9	1	4	4	4	2	1	1	1	4	4	9	8	8	8	8	8	5	9	8	1	8	8	8	8	8	8	2	8	9	8	8	8	8	8	7	6	6	7	N	8	6	8	7	9	N	8	8	8	8	1	N	9	9	8	8	8	4	4	4	4	1	4	1	1	8	1	1	4	7	2	8	4	6	4	8	2	N	8	8	8	1	8	8	7	8	8	4	9	8	8	8	9	8	4	4	N	8	8	8	8	8	8	7	4	8	8	1	7	N	8	7	8	6	4	8	N	4	4	8	9	8	8	8	5	8	8	8	8	8	9	7	N	1	8	8	45	9	9	4	45	44	40	2	N	11	36	56	40	36	N	8	8	8	8	40	9	N	N	8	8	N	N	8	9	9	8	9	3	N	13	1	9	7-	7	4	4	4	N	4	8	6	8	8	4	4	N	3	9	46	10	N	9	9	9	9	8	4	4	4	8	8	7	8	8	8	8	8	7	8	8	8	7	7	N	4	4	8	9	4	4	4	9	N	8	8	8	4	8	8	8	8	9	8	8	8	8	8	8	6	8	1	6	6	8	8	8	8	8	5	8	7	7	8	8	8	8	9	8	8	8	8	7	8	8	8	1	8	9	8	7	8	7	8	8	8	6	2	8	8	N	8	7	3	9	8	9	7	1	8	8	7	7	7	8	3	3	7	2	8	8	7	8	8	8	47	8	7	8	8	8	N	9	8	8	8	8	8	1	8	8	N	8	8	4	8	8	N	8	8	N	5	6	9	4	8	9	7	8	10	N	N	7	1	8	8	8	0?	8	8	8	8	7	1	8	N	1	1	8	8	9	7	7	8	6	8	4	8	4	4	8	4	4	4	4	4	8	1	2	2	3	8	8	1	8	4	8	7	8	8	1	8	4	4	3	7	4	2	1	8	9	8	9	4	4	4	4	4	4	N	4	4	8	55	8	7	8	7	8	4	4	4	8	8	8	8	8	9	6	6	9	3	9	9	9	9	1	9	9	9	9	9	9	8	8	5	4	4	4	4	8	N	4	3	8	1	4	8	8	8	N	3	4	N	N	9	8	2	5	8	7	8	7	8	8	7	9	8	7	N	8	8	7	8	7	1	N	4	N	4	4	4	4	3	4	8	8	8	40	8	8	8	8	8	9	8	9	8	8	8	8	8	N	8	8	7	8	7	9	8	7	4	8	8	0?	8	8	7	6	N	8	4	4	4	8	1	8	8	8	8	7	8	3	5	8	1	8	8	3	5	9	8	8	8	8	N	7	8	7	8	9	8	1	1	4	3	4	8	8	2	8	8	4	8	8	9	8	9	7	N	8	7	5	8	N	7	8	2	7	9	8	6	8	8	8	7	8	1	20	9	1	1	2	1	1	1	4	4	1	1	1	3	2	1	2	1	1	1	1	1	N	3	1	4	1	1	4	1	7	9	8	8	8	N	9	8	8	N	4	9	1	1	N	2	1	7	8	8	8	5	7	8	8	8	8	2	N	4	8	4	8	8	3	8	8	9	8	9	8	8	8	8	6	7	8	8	8	8	13	N	8	8	8	8	8	8	8	N	8	N	9	8	1	4	3	1	4	10	8	9	9	9	4	4	1	9	6	1	4	8	4	7	9	9	N	2	7	8	9	9	10	10	1	10	10	10	N	4	7	4	3	4	4	4	7	9	4	N	9	4	9	N	9	14	9	4	9	3	9	8	9	9	9	9	9	9	8	42	9	3	9	9	9	9	9	9	9	9	9	9	9	8	N	8	8	8	9	8	8	8	8	9	7	8	8	8	9	9	4	4	4	N	4	4	4	9	4	4	8	9	N	6	8	9	9	2	44	4	4	41	8	6	9	9	9	9	7	8	10	9	4	4	4	7	9	9	8	8	5	9	10	N	8	1	9	8	9	10	9	13	9	9	9	8	9	9	9	9	10	9	10	9	9	9	9	9	9	6	1	9	9	9	1	2	2	9	9	0?	56	9	9	9	8	7	N	9	9	9	9	8	N	9	9	8	66	40	4	31	2	2	40	46	40	17	2	12	6	N	7	1	N	9	9	9	80	N	4	9	4	1	9	9	9	9	9	4	4	4	N	4	4	3	4	8	9	9	9	6	9	9	9	9	9	0	0
GCA_000241685.2_ASM24168v2_genomic.fna	3	4	4	4	4	2	1	1	4	4	1	4	4	4	4	4	4	4	4	4	4	3	4	4	1	N	4	2	3	4	2	3	4	4	6	6	7	7	7	7	6	36	7	53	7	47	7	7	2	7	7	7	6	7	7	7	7	7	1	7	7	6	6	7	53	77	49	81	66	55	49	51	68	39	40	30	0?	67	4	4	4	4	4	4	71	4	4	4	4	4	4	4	1	4	1	4	4	4	4	4	4	4	4	4	4	4	4	4	3	4	4	4	3	3	1	1	1	3	3	4	3	4	4	4	4	4	7	4	4	4	3	4	49	11	4	4	4	4	4	7	58	4	4	4	N	4	3	4	3	4	45	6	6	6	5	6	1	3	4	4	4	4	4	3	4	4	1	1	1	1	4	1	4	6	6	4	2	4	4	4	4	6	2	4	N	4	4	4	4	3	4	4	4	4	4	4	3	2	3	4	5	4	4	4	1	1	2	2	1	1	6	6	4	6	2	6	4	4	6	4	4	4	N	4	4	3	4	4	4	4	4	4	4	4	4	6	6	6	5	6	6	6	6	6	N	6	N	4	4	4	4	4	4	3	4	4	6	4	4	6	4	4	4	N	N	4	4	4	1	N	4	6	4	4	4	N	4	4	3	1	6	4	3	4	4	4	4	6	1	4	4	4	4	4	4	4	4	6	1	4	4	4	4	4	30	4	4	6	N	4	4	4	1	4	4	1	4	1	4	1	4	4	4	4	6	4	4	4	4	4	4	4	1	4	4	2	4	4	4	6	15	4	3	2	4	1	1	4	4	4	4	2	4	4	4	N	4	4	4	N	1	1	N	4	4	1	4	4	4	4	4	4	4	4	4	4	4	4	4	3	4	4	4	4	4	4	4	4	2	3	N	3	4	4	4	4	4	2	3	38	4	4	N	4	48	4	4	4	4	4	4	4	1	1	N	1	10	59	4	4	4	N	4	4	6	4	1	4	3	N	4	4	4	37	4	4	4	4	4	4	4	3	2	4	4	4	1	4	4	4	1	2	4	32	4	2	4	1	4	4	4	4	4	4	4	N	6	6	3	6	6	4	3	1	4	4	4	4	4	6	5	6	6	N	6	2	6	6	6	6	4	6	6	7	6	6	6	6	4	6	4	4	4	4	4	4	4	4	4	1	4	1	4	4	4	4	2	1	6	4	2	4	4	3	3	2	4	4	4	29	4	4	4	4	4	3	4	4	4	N	4	4	4	4	4	4	4	4	4	4	N	N	4	4	4	N	4	4	3	4	4	4	4	4	4	4	4	3	3	4	4	1	1	4	4	1	3	4	4	4	4	4	3	1	2	4	4	3	4	4	4	N	4	4	4	4	1	4	38	6	4	45	4	4	4	4	1	4	6	1	N	4	4	4	4	4	5	6	3	1	2	N	4	4	4	4	4	3	4	6	2	4	6	4	1	1	4	4	4	54	4	39	4	5	4	6	4	4	4	5	54	5	5	5	4	6	6	6	4	4	45	5	5	5	5	5	5	3	5	5	5	1	5	38	4	5	5	5	5	4	4	39	58	4	2	6	4	3	4	51	4	6	4	4	N	4	4	N	4	4	4	4	4	4	4	4	6	4	4	4	1	4	1	5	4	6	4	4	4	4	N	4	4	4	4	3	4	1	4	4	4	7	4	4	6	6	6	6	6	6	6	6	4	4	4	4	4	4	4	4	3	4	4	4	4	4	4	3	4	6	4	4	4	4	4	4	N	4	36	N	4	6	4	4	4	4	4	4	1	37	4	3	4	4	3	4	4	2	4	4	4	1	4	3	3	4	4	4	N	4	4	18	3	4	4	1	4	4	42	5	4	4	4	4	57	4	4	3	3	3	3	4	2	2	4	4	4	N	5	N	53	4	4	4	4	4	4	4	4	4	4	4	4	4	2	3	6	4	N	4	N	3	N	4	4	4	4	4	4	4	6	4	4	4	4	4	4	4	4	N	6	4	4	4	4	6	4	4	4	N	4	4	4	3	N	4	4	4	4	4	4	4	4	4	4	4	4	4	4	5	3	3	N	N	4	4	4	N	1	4	4	3	4	79	4	3	4	6	4	4	4	N	4	4	3	3	43	4	N	4	4	4	4	4	N	4	6	6	4	4	6	4	1	4	4	N	4	4	4	4	4	37	4	4	4	4	N	4	4	4	4	4	6	4	4	6	4	1	4	60	4	6	4	4	4	4	N	4	3	4	4	4	4	N	3	4	4	4	4	4	4	4	4	4	4	4	6	64	3	4	4	N	4	4	4	4	4	4	20	1	4	6	6	5	6	7	1	6	6	6	4	7	2	6	6	5	6	5	4	6	6	6	6	6	5	6	35	3	6	6	6	5	4	6	6	6	7	6	6	6	4	6	6	3	6	6	6	6	6	6	6	6	N	N	6	5	6	6	1	6	6	6	6	4	62	4	3	6	5	3	6	6	2	5	5	3	6	5	N	6	6	22	7	6	6	6	N	6	6	5	4	N	6+	5	6-	4	4	6	4	7	4	N	4	4	4	4	2+	37	2	4	4	4	7	1	4	6	6	2	26	4	5	6	43	6	6	6	6	5	6	45	40	6	6	6	6	6	6	6	6	6	6	40	6	6	6	6	5	5	6	35	6	6	4	2	N	4	4	4	4	4	4	4	3	4	4	4	4	4	4	105	4	6	3	N	4	4	4	4	1	77	N	43	4	4	4	1	4	4	4	4	6	3	4	4	N	4	6	N	4	4	4	4	68	4	4	N	N	N	4	4	6	4	4	4	4	4	4	4	4	4	N	4	4	4	4	4	4	4	4	2	6	4	4	4	4	4	4	4	4	4	4	4	4	4	N	4	4	4	4	1	4	3	4	N	4	4	31	4	N	4	4	4	4	4	32	2	4	4	2	2	6	1	4	3	2	1	3	4	4	2	4	6	4	4	4	1	4	4	6	4	3	N	4	4	4	4	43	6	4	4	4	4	4	4	4	5	4	4	3	5	5	4	4	3	3	4	4	55	4	1	4	4	38	4	1	4	4	2	4	4	6	2	4	4	4	4	4	4	6	4	1	4	4	4	4	1	4	4	4	4	4	N	4	6	4	4	4	4	4	34	47	4	4	4	4	4	4	3	6	6	4	36	4	4	3	2	3	4	4+	4	N	4	1	N	4	4	41	4	4	4	4	4	6	4	N	4	4	4	4	4	4	4	4	4	4	N	5	3	N	4	2	3	3	N	4	4	1	4	4	4	4-	3	4	4	66	4	4	4	4	N	4	4	4	6	4	3	4	N	4	4	4	4	4	4	47	N	4	4	1	4	4	4	2	1	1	1	4	4	6	4	4	4	4	68	4	6	N	1	4	4	4	4	4	42	2	4	40	4	N	4	4	4	4	4	4	4	N	4	3	N	3	4	4	4	4	4	4	1	2	6	6	4	4	4	4	4	4	4	1	34	1	1	4	4	1	4	4	2	4	4	6	4	38	2	N	4	4	N	1	4	45	4	4	4	2	4	4	4	4	35	4	4	4	4	4	4	4	4	4	4	4	31	4	3	4	4	N	N	4	4	2	1	4	4	4	4	4	N	1	1	1	1	1	N	1	1	50	4	1	1	1	1	4	7	4	6	4	4	4	1	1	N	4	4	4	4	4	N	4	48	43	4	4	6	N	4	4	4	4	N	4	6	6	5	6	3	4	N	1	6	3	2	4	4	4	6	4	4	2	4	N	4	4	4	5	6	6	7	N	6	6	79	6	4	4	4	N	4	4	1	1	4	4	4	4	4	4	4	N	4	4	4	4	4	4	44	4	4	4	6	4	4	4	4	4	4	4	4	4	6	4	4	4	4	N	4	4	4	1	4	4	4	4	4	28	4	2	4	4	4	4	25	4	4	4	4	N	4	4	4	4	4	4	6	4	4	4	4	4	31	4	4	4	3	4	4	4	4	4	3	2	4	4	6	4	1	4	4	3	4	3	4	3	4	2	2	N	4	4	4	4	4	4	4	3	4	4	4	N	4	4	5	4	4	4	1	4	4	N	4	4	4	4	4	N	6	4	4	2	1	6	1	4	6	4	4	7	N	N	4	1	4	4	4	0?	4	4	4	4	4	4	40	4	1	3	4	4	4	4	4	23	4	N	4	4	N	4	4	4	4	4	4	4	4	1	2	4	4	4	4	7	4	5	4	N	4	N	4	4	4	4	3	3	1	1	3	4	6	4	6	6	4	4	4	4	4	7	37	4	4	N	4	N	4	4	4	4	4	4	4	4	4	4	N	6	N	6	6	2	6	6	6	6	4	6	N	6	6	6	6	4	4	3	N	4	N	4	4	4	4	3	4	1	6	4	4	4	2	2	4	4	4	N	4	3	4	4	4	4	4	4	N	4	4	4	4	4	5	4	N	4	4	3	N	4	4	4	4	4	4	3	4	4	4	4	6	0?	53	4	40	4	6	5	6	N	4	4	4	4	N	4	4	4	4	4	4	4	4	4	4	6	0?	6	50	5	6	N	4	4	4	4	4	1	4	4	4	4	4	4	5	2	4	1	4	4	3	18	40	4	4	4	4	N	4	4	4	4	6	4	1	1	4	3	4	4	N	3	4	4	4	33	4	4	4	6	4	4	4	4	3	4	N	4	4	2	4	4	4	3	4	4	4	4	4	4	4	6	1	1	2	1	1	1	4	4	1	1	1	3	2	1	2	1	1	1	1	1	1	1	1	4	1	3	1	1	4	6	4	4	6	4	6	4	4	N	4	4	3	3	4	3	3	4	4	4	40	4	4	4	N	44	4	4	4	4	N	39	4	4	3	4	4	6	4	6	4	4	4	4	3	4	4	6	4	4	N	4	4	4	4	4	39	4	4	4	4	4	4	4	2	4	3	1	4	N	4	4	4	4	4	4	1	N	1	1	4	4	4	4	4	N	4	2	4	4	4	4	7	7	7	7	7	7	62	1	29	4	3	4	4	4	3	4	4	4	4	4	4	7	4	4	4	4	4	4	4	4	4	4	4	4	4	4	4	4	4	4	4	4	4	4	4	38	4	4	4	4	4	4	4	4	4	4	6	4	4	4	4	4	4	4	4	4	4	4	4	4	4	N	4	4	4	4	4	4	4	4	4	3	3	4	4	4	4	4	4	4	3	3	4	4	4	4	4	4	7	4	4	4	4	1	4	4	4	5	3	4	7	4	4	1	4	3	4	4	4	4	4	4	4	4	4	4	4	4	7	4	7	4	4	4	4	4	4	N	1	4	4	4	1	4	4	4	4	4	4	4	4	6	4	4	N	4	4	51	4	4	4	4	4	N	4	4	4	4	3	4	4	3	4	4	2	4	4	N	4	1	7	4	4	4	4	4	4	N	4	1	4	4	4	4	4	4	4	4	4	4	4	3	4	6	4	54	35+	3	4	4	4	4	4	0	0
GCA_000241705.2_ASM24170v2_genomic.fna	2	2	46	2	2	2	1	1	2	2	1	2	2	2	2	2	2	2	2	17	2	2	2	2	2	2	2	2	2	2	2	2	2	2	2	2	2	2	2	2	2	2	47	59	56	51	58	3	21	41	75	54	40	35	15	53	48	2	1	2	2	2	2	2	2	45	2	2	2	2	2	2	35	14	2	2	2	2	2	2	2	2	2	2	2	2	2	57	2	2	2	2	2	2	2	2	2	2	2	2	12	2	2	2	2	2	2	2	4	2	2	2	1	2	1	1	2	2	2	2	1	2	2	2	2	2	2	2	47	2	2	2	2	N	2	2	2	2	2	2	2	2	2	2	2	2	2	2	2	2	2	16	2	2	2	2	2	2	2	2	2	2	2	2	2	2	2	16	2	2	2	2	2	2	2	2	2	2	2	2	2	2	2	2	2	40	2	2	2	2	2	2	2	2	2	2	1	1	1	2	1	2	2	2	1	1	1	2	2	1	2	2	2	2	2	2	2	15	2	2	2	90-	2	39	2	2	2	2	2	2	2	2	2	2	2	2	2	2	2	2	2	2	2	2	2	2	2	16	8	2	2	14	2	2	2	2	2	2	15	2	2	2	2	2	2	2	2	2	1	2	2	2	2	2	2	2	2	2	2	2	2	2	2	2	2	14	2	2	1	2	2	2	2	2	2	2	2	2	1	2	2	2	2	2	2	15	2	2	2	2	2	2	2	15	2	2	2	2	2	1	2	2	2	2	2	2	2	10	2	2	2	2	2	2	2	1	2	2	2	2	2	2	2	2	2	1	1	2	2	2	2	1	2	16	2	2	29	2	2	N	2	1	2	2	2	2	2	15	51	15	2	2	2	16	2	2	2	2	2	2	2	2	2	2	2	2	2	2	2	1	2	2	2	2	2	2	2	2	2	2	2	2	2	16	2	48	2	2	2	2	2	2	2	2	2	16	2	17	2	2	2	2	14	2	53	2	1	2	2	2	2	2	2	2	2	2	2	2	2	2	2	2	1	2	53	2	2	2	2	37	1	1	2	34	2	2	2	2	2	2	2	2	2	2	2	2	2	2	2	2	2	2	2	1	2	2	2	2	2	2	2	2	2	2	2	2	2	2	2	2	2	2	2	2	2	2	2	2	15	17	2	2	2	2	2	2	2	2	2	1	2	2	2	2	2	2	1	2	2	2	2	2	2	2	2	2	2	2	2	2	2	15	2	2	16	2	2	2	2	2	2	2	2	2	2	2	2	2	2	2	2	2	2	45	2	2	2	2	2	2	2	2	2	2	2	2	2	2	2	2	2	1	1	2	2	1	2	62	2	2	N	2	2	2	1	2	2	2	2	2	2	2	2	2	16	2	2	2	2	2	2	2	2	16	2	2	2	2	2	1	1	2	2	2	2	2	2	2	2	2	1	1	2	2	2	2	2	2	42	2	2	2	2	2	2	2	2	2	2	2	2	2	2	2	2	2	2	2	2	2	2	15	2	2	1	2	18	2	2	2	2	2	2	2	2	2	2	2	2	2	2	2	2	2	2	2	2	2	2	2	2	2	16	2	2	2	2	51	2	2	2	2	2	2	2	83	2	2	2	2	2	2	2	2	2	2	2	2	2	16	2	2	2	2	2	42	2	2	2	2	45	2	2	2	2	1	2	2	2	2	2	2	2	2	2	2	2	2	2	2	2	2	2	2	2	2	2	2	2	2	1	2	2	2	2	2	2	2	2	2	2	2	2	2	51	2	2	2	2	2	15	2	2	57	2	2	2	2	1	2	2	1	2	2	21	2	2	2	2	2	2	2	2	1	1	2	2	2	2	2	2	2	2	34	2	2	57	2	215+	2	2	2	2	2	2	2	2	2	2	2	2	2	2	2	2	2	2	2	2	1	2	2	2	2	2	2	2	2	2	2	2	2	2	16	1	N	2	2	2	2	2	2	2	2	2	2	2	2	2	2	2	2	16	2	2	2	2	2	2	2	2	2	2	34	2	2	2	2	2	16	2	2	17	2	2	2	2	2	2	2	15	2	2	2	2	2	2	2	2	N	2	1	2	2	2	2	2	2	2	2	16	2	2	16	2	2	36	2	2	2	2	2	2	2	364-	2	15	2	2	2	2	2	2	2	2	2	2	2	17	4	2	2	2	10	2	2	15	2	2	15	2	2	2	2	2	2	2	2	16	2	2	2	2	2	2	2	2	2	2	2	2	2	2	2	2	2	2	2	2	2	2	2	2	2	13	2	2	2	2	2	2	2	2	2	2	2	2	1	1	2	2	2	2	2	15	2	2	2	2	1	2	2	2	2	2	2	2	2	2	2	1	2	2	2	2	2	2	2	2	2	2	2	2	2	2	2	2	2	2	2	2	2	2	2	2	2	2	2	2	2	2	2	65	2	2	2	2	2	2	2	2	2	2	2	2	2	2	2	1	2	2	2	2	2	64	2	2	2	2	2	2	2	2	2	2	1	45	2	2	2	2	2	2	2	16	2	41	2	2	2	1	2	2	2	2	2	2	2	15	2	2	2	2	2	2	2	2+	2	2	2	2	2	2	2+	2	2	2	2	2	2	2	2	17	2	2	2	2	2	2	2	2	2	2	2	16	2	16	2	2	2	2	2	2	2	2	2	2	N	2	2	2	2	37	2	2	2	2	2	2	2	2	2	2	2	2	2	2	2	2	16+	2	2	2	2	2	N	2	2	25	2	N	2	2	2	2	2	2	2	2	13	2	2	16	16	2	2	2	2	2	10	2	2	59	95	2	2	2	2	2	2	2	2	2	2	2	2	2	2	2	2	2+	2	2	2	2	16	2	2	2	2	2	2	2	2	2	2	2	2	2	2	N	2	2	2	2	2	2	2	2	2	2	2	2	2	2	2	2	2	2	2	2	2	2	2	2	1	2	2	2	2	2	2	2	1	2	1	2	2	15	1	2	2	2	2	2	1	2	2	2	2	2	2	2	2	2-	2	2	2	2	2	2	2	2	31	2	2	2	2	2	2	1	2	2	2	1	2	2	2	2	2	2	2	2	2	1	2	2	2	2	2	2	2	17	2	2	2	2	65	46	2	1	2	2	2	2	1	2	2	2	2	2	2	2	2	2	2	2	2	2	2	2	2	2	2	2	2	2	2	2	2	2	2	2	2	2	2	2	2	2	2-	2	2	1	2	2	2	2	2	2	15	2	2	2	2	2	2	2	2	2	2	2	2	2	2	2	2	2	2	16	2	2	1	1	2+	2	2	1	2	2	2	2	2	2	2	17	2	2	2	2	2	2	2	2	43	2	N	2	2	2	2	2	35	2	2	N	2	13	2	2	2	2	2	2	1	1	2	2	2	2	2	2	6	2	15	2	2	2	1	2	2	2	2	15	2	2	2	2	2	2	2	2	2	2	2	22	2	2	2	2	2	2	2	2	2	2	2	2	1	2	2	2	2	2	2	2	2	42	2	13	2	1	1	2	2	12	2	2	2	15	2	2	2	2	2	2	2	2	16	1	2	2	2	2-	2	1	16	2	2	2	2	2	16	2	2	2	2	2	2	2	2	2	2	2	2	2	2	2	2	2	2	2	2	2	62	2	2	2	2	2	34	2	2	2	40	2	2	2	2	2	2	2	2	2	2	2	2	2	14	16	2	2	2	2	2	3	2	2	2	2	15	2	2	2	2	2	2	16	2	2	2	2	2	2	36	2	2	2	2	2	2	2	2	2	2	2	2	2	2	2	2	2	2	2	2	2	2	2	2	2	2	2	16	2	14	2	2	2	2	15	2	16	2	41	2	2	2	2	2	2	2	2	2	2	2	16	2	2	14	2	2	2	2	41	2	2	16	2	2	2	2	2	2	2	2	2	2	2	2	1	2	11	2	2	2	2	2	1	2	2	2	2	2	2	2	2	2	2	2	2	2	35	10	10	10	2	2	2	5	2	2	2	2	2	2	2	2	2	N	2	2	1	11	9	11	2	1	2	2	2	2	2	2	1	2	2	2	2	2	2	16	2	2	2	2	2	16	39	10	11-	57	25	10	10	10	10	2	10	10	N	10	10	8	10	64	2	2	15	2	N	2	2	2	2	2	2	2	2	2	2	2	1	2	2	2	0?	2	2	2	2	2	2	2	2	2	2	2	2	2	2	2	2	2	2	2	2	2	2	2	2	31	2	50	2	2	1	2	2	2	2	2	1	2	2	2	2	2	2	2	2	2	2	1	1	1	1	2	2	2	2	2	2	2	2	2	2	2	2	2	2	15	2	2	2	2	2	2	2	2	2	2	2	2	2	2	2	2	2	59	1	2	2	2	2	2	2	15	2	2	2	2	2	2	2	2	2	2	2	34	2	2	2	2	1	2	2	45	2	2	2	2	2	2	2	2	2	2	2	2	2	2	2	2	2	2	2	2	2	2	2	2	2	2	1	2	2	2	2	2	2	2	2	2	2	2	2	34	21	45	32	34	17	35	2	13	2	2	2	2	2	2	2	2	2	2	2	2	2	2	2	2	2	75-	2	2	N	2	2	2	2	2	2	2	1	2	2	2	2	2	2	2	2	38	1	2	2	2+	2	2	2	2	2	2	2	2	2	2	2	2	2	1	1	2	2	2	2	2	2	2	2	2	2	2	2	2	2	2	2	2	2	6	2	35	2	2	2	2	2	2	1	2	9	2	55	2	2	2	2	1	2	2	1	1	1	8	2	1	1	1	2	1	1	5	1	1	1	1	1	2	1	1	12	1	2	1	1	2	35	2	2	2	2	2	2	2	2	2	2	1	1	2	2	1	2	2	2	2	6	2	2	2	2	2	2	2	2	2	2	2	2	2	2	2	2	2	2	2	2	2	2	2	2	2	2	2	2	2	2	2	2	2	2	2	2	2	2	2	2	34	15	1	2	1	1	2	2	2	2	2	2	2	2	1	2	2	1	2	2	2	2	17	2	2	2	13	2	2	2	2	17	2	2	2	18	2	2	2	2	2	42	40	26	12	18	29	60	2	2	2	2	2	2	16	13	2	2	2	2	2	2	2	2	2	2	2	2	2	13	2	2	2	2	2	2	2	2	2	2	2	2	2	2	2	2	2	2	13	2	2	2	15	2	2	2	2	2	2	2	2	16	2	2	2	2	2	2	2	2	2	2	2	2	2	2	2	2	2	2	1	1	2	2	32	2	2	2	2	2	2	2	2	2	43	2	2	1-	1	2	2	2	2	1	2	2	2	2	2	2	2	2	2	2	N	2	2	2	2	2	2	2	2	2	10	2	2	2	2	2	2	2	1	2	2	2	2	1	2	2	2	84	2	2	2	2	2	2	2	2	2	2	2	2	2	2	2	2	2	2	2	2	2	2	2	2	2	2	28	1	2	2	2	2	53	2	2	2	2	1	16	2	2	2	2	2	2	36	2	2	2	2	2	2	2	2	2	2	2	2	2	2	2	0	0
GCA_000241725.2_ASM24172v2_genomic.fna	2	63	1	1	1	1	1	1	1	50	1	1	1	1	1	1	1	1	1	1	1	1	1	1	1	1	1	1	1	1	1	1	1	1	1	1	59	4	4	4	2	4	4	54	4	4	59	6	3	34	76	23	41	36	41	54	49	1	1	56	1	1	1	1	55	78	50	83	68	57	51	53	70	41	41	12	12	13	13	13	13	13	8	14	14	13	14	14	15	14	18	6	5	6	5	6	6	6	6	5	6	5	6	5	5	6	6	6	5	6	6	6	3	5	1	1	2	11	2	6	4	6	6	6	11	11	13	10	12	12	7	10	12	N	12	12	9	9	7	13	12	9	7	11	12	12	11	11	8	11	11	6	6	6	5	6	1	1	1	1	13	1	1	1	1	6	6	5	5	5	6	4	1	1	1	1	1	1	1	1	1	1	1	1	1	1	1	1	1	1	1	1	1	1	1	6	1	1	1	1	1	1	1	1	1	1	1	1	1	1	1	1	1	1	1	1	1	1	1	1	1	1-	1	1	1	1	1	1	6	1	1	1	1	1	1	1	1	1	1	1	1	1	1	1	1	1	1	1	1	1	1	1	1	1	1	1	1	1	1	1	1	1	1	1	1	1	1	1	1	1	1	1	1	1	1	6	1	1	1	1	1	1	1	1	1	1	1	1	1	1	1	1	1	1	1	1	1	1	1	1	1	1	1	1	1	1	1	1	1	1	1	1	1	1	1	1	1	1	1	1	1	1	1	1	1	1	1	1	1	1	1	1	1	1	1	1	1	1	1	1	1	1	1	1	1	11-	0?	1	1	1	1	1	1	1	1	1	1	1	1	1	1	1	1	1	1	1	1	1	1	1	1	1	1	55	1	1	1	1	1	1	1	1	1	1	1	1	1	1	1	1	1	1	1	1	1	6	1	1	1	1	1	1	1	1	1	1	1	1	63	1	1	1	1	1	1	1	1	6	13	40	1	1	1	1	1	47	1	1	1	1	1	1	1	1	1	1-	1	1	1	1	1	1	1	1	1	1	1	1	1	1	1	1	1	1	1	1	1	1	1	1	1	1	1	1	1	1	1	1	1	1	1	1	1	1	1	1	1	1	1	1	1	1	1	6	1	1	1	1	1	1	1	1	1	1	1	1	1	1	1	1	1	1	1	1	1	1	1	1	1	1	1	1	42	1	1	1	1	1	1	1	1	1	1	1	1	1	1	1	6	1	1	1	1	1	1	1	1	1	1	3	1	1	1	1	1	1	1	1	1	1	1	N	1	1	1	1	1	1	1	1	1	1	1	1	1	1	1	1	1	1	1	1	1	1	1	1	1	1	1	6	1	1	1	1	1	1	1	1	6	1	1	1	6	1	1	1	1	1	1	1	1	1	1	1	1	1	1	1	1	1	1	1	1	1	1	1	1	1	140-	1	1	1	1	1	1	1	1	1	1	1	1	1	1	1	1	1	1	1	1	1	1	1	1	1	1	44	6	1	1	1	12	11	11	12	10	12	107	67	11	12	11	11	11	13	13	1	1	1	1	1	1	1	1	1	1	1	1	1	1	1	1	1	1	1	1	1	1	1	1	1	1	1	1	N	1	1	6	1	6	1	1	1	1	1	1	1	1	1	1	1	1	1	1	1	1	1	1	1	1	1	1	1	1	1	1	1	1	1	1	1	1	1	1	1	1	1	1	1	1	1	1	1	1	1	1	1	1	1	1	6	1	1	1	1	1	1	1	1	33	1	1	1	1	1	1	1	1	1	1	1	0?	0?	1-	1	59	1	1	1	1	1	1	1	1	1	1	1	1	1	1	1	1	1	6	1	1	1	1	1	1	1	1	1	1	1	1	1	1	1	1	43	1	1	45	1	6	1	1	1	1	1	1	1	1	1	1	1	1	1	1	1	1	1	1	1	1	1	1	1	1	1	1	1	1	1	1	1	1	1	1	1	1	1	1	1	21	1	1	1	50	1	1	48	1	1	1	1	1	1	1	1	1	6	1	1	1	1	1	1	1	1	1	1	6	1	1	1	1	1	1	1	1	1	1	1	1	1	1	1	1	1	1	1	1	1	1	1	1	1	1	1	1	1	1	1	1	1	1	1	1	1	1	1	1	1	1	1	1	1	1	1	1	1	1	1	1	1	1	1	1	1	1	1	1	1	1	1	1	1	1	1	1	1	58	1	1	1	1	1	1	1	1	6	1	1	1	1	1	1	1	1	1	1	1	1	1	1	1	1	1	1	1	1	1	1	1	1	1	1	1	1	1	1	1	1	1	1	1	1	1	1	1	1	1	1	1	1	1	1	1	1	1	1	1	1	1	1	1	1	1	1	1	1	1	1	1	1	1	1	1	1	1	1	1	1	1	1	1	1	1	1	1	1	1	1	1	1	6	1	1	1	1	1	1	1	1	1	1	1	1	1	1	1	1	1	1	1	1	1	1	1	1	1	1	1	1	5	1	1	1	1	1	1	1	1	1	1	1	1	1	1	1	1	8	1	1	42	1	1	1	1	1	1	1	1	1	1	6	1	1	1	1	1	1	1	1	1	1	1	1	1	1	1	1	1	1	1	1	1	1	1	1	1	1	1	1	1	1	1	1	1	1	1	1	1	1	1	1	1	1	1	1	1	1	1	1	1	1	1	1	1	1	1	1	1	1	6	438+	6	1	1	1	1	1	1	1	1	1	43	46	1	1	1	1	1	1	1	1	1	1	1	1	1	1	1	1	1	1	1	1	1	1	1	1	1	1	1	1	1-	1	1	1	1	1	1	1	1	1	1	1	1	1	6	1	1	32	1	1	1	1	47	1	1	1	1	1	1	1	1	1	1	1	1	1	1	1	1	1	1	1	1	1	1	1	1	1	1	1	1	1	1	1	1	1	1	6	1	1	1	1	1	1	1	1	1	1	1	1	1	1	1	1	1	1	1	1	1	1	1	1	1	1	1	1	1	1	1	1	1	1	1	1	1	1	1	1	1	1	1	1	1	1	1	1	1	1	1	1	1	1	1	1	1	1	1	1	1	1	1	1	1	1	1	1	1	1	1	1	1	1	1	1	1	6	1	1	1	1	1	1	1	1	1	34	1	1	1	1	1	1	1	1	1	6	44	1	1	1	1	1	1	1	6	1	46	1	1	1	1	1	1	1	1	1	1	1	1	1	1	1	1	1	1	1	1	1	1	1	1	1	117	1	1	1	1	6	1	1	1	1	1	6	1	1	1	1	1	1	1	1	1	1	1	1	1	1	1	1	1	1	1	1	1	1	1	1	1	1	1	1	1	1	1	6	1	1	1	1	1	1	1	34	1	1	1	1	1	1	6	1	1	1	1	1	1	1	1	1	1	1	1	1	1	1	1	1	1	1	1	1	1	39	1	1	1	1	1	1	1	1	1	1	1	1+	1	1	1	N	45	1	1	1	6	1	1	1	1	1	1	1	1	1	13	1	1	1	1	1	1	1	1	1	1	1	1	1	1	1	1	1	1	1	1	1	1	1	1	1	1	1	1	1	1	1	1	1	6	1	1	1	6	1	1	1	1	1	1	N	1	1	1	1	1	1	1	1	1	1	1	1	37	1	1	1	1	1	1	1	53	30	5	5	6	5	5	5	5	5	6	5	4	5	5	1	6	6	1	1	6	6	42	5	5	19	1	1	1	1	1	1	1	1	1	1	1	1	1	59	40	41	45	56	1	42	1	1	1	1	1	1	1	1	36	1	1	1	1	1	1	1	1	1	1	1	1+	1	1	1	6	1	1	33	1	1	1	1	1	1	1	1	1	5	1	1	1	1	1	1	1	1	1	1	1	1	1	1	1	1	1	1	1	1	1	1	1	1	65	1	1	1	1	1	1	1	1	1	1	1	1	1	1	59	1	1	1	1	1	1	1	1	1	1	1	1	1	6	1	1	1	44	35	43	1	39	41	29	37	5	5	37	32	13	28	32	3	5	47	61	48	35	3	1	6	1	6	4	1	1	1	1	1	1	1	1	1	1	1	1	1	1	1	1	1	1	1	1	1	1	1	6	1	1	1	1	1	1	1	1	1	N	1	1	1	1	1	6	1	42	1	1	1	1	1	1	1	1	1	1	1	1	1	1	1	1	1	1	1	1	1	1	1	1	1	1	1	1	1	1	6	1	1	1-	1	1	1	1	1	1	1	1	1	1	1	1	1	1	1	1	1	1	1	1	1	1	1	1	1	1	1	1	1	1	1	1	1	1	1	1	1	1	1	1	1	1	1	1	1	6	1	1	1	1	1	1	1	1	1	1	1	1	1	1	1	1	1	1	1	1	1	1	1	1	1	1	1	1	1	1	1	1	1	1	1	1	53	1	1	1	1	1	1	1	1	1	1	1	1	1-	1	1	1	1	1	N	1	1	1	1	1	1	1	1	38	1	1	1	1	1	1	1	1	1	1	1	1	1	1	1	55	6	1	1	1	1	1	1	1	1	55	1	1	1	1	1	1	1	1	1	1	1	1	1	1	1	1	1	6	50	1	1	1	1	1	1	1	4	1	1	1	1	1	1	1	1	1	1	1	1	1	1	1	1	1	1	1	1	1	1-	1	1	1	1	1	1	1	1	1	1	1	1	1	1	1	1	1	1	1	1	1	1	1	1	1	1	1	1	1	1	1	1	1	1	1	1	1	1	1	1	1	1	1	1	1	1	1	1	1	1	1	1	3	1	1	1	1	1	1	1	1	3	1	1	1	1	1	1	1	1	1	1	1	1	1	1	1	1	1	1	1	1	1	1	1	1	1	1	1	1	1	1	1	1	1	1	1	1	1	1	1	1	39	1	1	1	1	1	1	1	1	1	1	1	1	1	1	71	1	1	1	1	1	3	1	1	1	1	1	1	1	1	1	1	1	1	1	1	1	1	6	1-	1	1	1	1	1	6	6	6	6	6	6	9	2	6	1	2	5	1	1	1	1	1	1	1	1	13	1	1	1	1	1	1	1	1	58	1	1	1	1	1	1	1	1	1	1	1	1	1	1	1	1	1	1	1	1	1	1	1	1	1	1	1	1	1	1	1	1	1	1	1	1	1	1-	1	1	1	1	1	1	1	1	1	12	1	43	1	1	1	1	1	1	1	1	1	13	1	1	1	1	1	1	1	1	1	1	1	1	1	1	1	1	1	1	1	14	1	1	1	1	1	1	1	1	1	1	1	1	1	1	1	1	1	1	1	1	1	1	1	1	1	1	1	55	1	1	1	1	1	1	1	13	1	1	1	13	1	1	1	1	1	1	1	1	1	1	1	1	1	1	1	1	1	1	1	1	1	1	1	1	1	1	1	1	1	1	1	1	1	1	1	1	1	13	1	1	1	1	1	1	1	1	1	1	1	1	1	1	1	1	1	1	1	1	12	1-	1	1	1	1	1	1	1	1	1	1	1	1	1	1	1	1-	1	1	1	1	1	1	1	1	1	1	0	0
GCA_000248195.2_ASM24819v2_genomic.fna	0?	0?	0?	0?	0?	24	0?	0?	0?	0?	0?	0?	0?	0?	0?	0?	0?	0?	0?	0?	0?	0?	0?	0?	0?	0?	0?	0?	0?	0?	0?	0?	0?	0?	0?	0?	0?	0?	0?	0?	0?	0?	0?	0?	0?	0?	0?	0?	0?	0?	0?	0?	0?	0?	0?	0?	0?	0?	68-	0?	0?	0?	0?	0?	0?	0?	0?	0?	0?	0?	0?	0?	0?	0?	0?	0?	0?	0?	0?	0?	0?	0?	0?	0?	0?	0?	0?	0?	0?	0?	0?	0?	0?	0?	0?	0?	0?	0?	0?	0?	0?	0?	0?	0?	0?	0?	0?	0?	0?	0?	0?	0?	0?	0?	N	N	0?	0?	0?	0?	0?	0?	0?	0?	0?	0?	0?	0?	0?	0?	0?	0?	0?	0?	0?	0?	0?	0?	0?	0?	0?	0?	0?	0?	0?	0?	0?	0?	0?	0?	0?	0?	0?	0?	0?	0?	0?	0?	0?	0?	0?	0?	0?	0?	0?	0?	0?	0?	0?	0?	0?	0?	0?	0?	0?	0?	0?	0?	0?	0?	0?	0?	0?	0?	0?	0?	0?	0?	0?	0?	0?	0?	0?	0?	0?	0?	0?	0?	0?	0?	0?	0?	0?	0?	0?	0?	N	0?	0?	101-	0?	0?	0?	0?	0?	0?	0?	0?	0?	0?	0?	0?	0?	0?	0?	0?	0?	0?	0?	0?	0?	0?	0?	0?	0?	0?	0?	0?	0?	0?	0?	0?	0?	0?	0?	0?	0?	0?	0?	0?	0?	0?	0?	0?	0?	0?	0?	0?	0?	0?	0?	0?	0?	0?	0?	0?	0?	0?	N	0?	0?	0?	0?	0?	0?	0?	0?	0?	0?	0?	0?	0?	0?	0?	0?	0?	0?	0?	68-	0?	0?	0?	0?	0?	0?	0?	0?	0?	0?	0?	0?	0?	0?	0?	0?	0?	0?	0?	0?	0?	0?	0?	0?	0?	0?	0?	0?	0?	0?	N	0?	0?	0?	0?	0?	0?	0?	0?	0?	0?	0?	0?	0?	0?	0?	0?	0?	0?	0?	0?	0?	68-	0?	0?	0?	N	21	0?	0?	0?	0?	0?	0?	0?	0?	0?	0?	0?	0?	0?	0?	0?	0?	0?	0?	0?	0?	0?	0?	0?	0?	0?	0?	0?	0?	0?	0?	0?	0?	0?	0?	0?	0?	0?	0?	0?	0?	0?	48-	0?	0?	0?	0?	0?	0?	0?	0?	0?	0?	0?	0?	0?	0?	0?	0?	0?	0?	0?	0?	0?	0?	0?	0?	0?	0?	0?	0?	0?	0?	0?	0?	0?	0?	0?	0?	0?	0?	0?	0?	0?	0?	0?	0?	0?	0?	0?	0?	0?	0?	0?	0?	0?	0?	0?	0?	0?	0?	0?	0?	0?	21	N	0?	0?	0?	0?	0?	0?	0?	0?	0?	0?	0?	0?	0?	0?	0?	0?	0?	0?	0?	0?	0?	0?	0?	0?	0?	0?	0?	0?	0?	0?	0?	0?	0?	0?	0?	0?	0?	0?	0?	0?	0?	0?	0?	0?	0?	0?	0?	0?	0?	0?	0?	0?	0?	0?	0?	0?	0?	18-	0?	16-	0?	0?	0?	0?	0?	0?	0?	0?	0?	0?	0?	0?	0?	89-	0?	0?	0?	0?	0?	0?	0?	0?	0?	68-	0?	0?	0?	1-	0?	0?	0?	0?	0?	0?	0?	0?	0?	0?	0?	0?	0?	0?	0?	0?	0?	0?	0?	0?	0?	0?	0?	0?	0?	0?	0?	0?	0?	0?	0?	0?	27	0?	0?	0?	0?	0?	0?	0?	0?	0?	0?	0?	0?	0?	0?	0?	0?	0?	0?	0?	0?	0?	0?	0?	0?	0?	0?	0?	0?	0?	0?	0?	0?	0?	0?	0?	0?	N	93	0?	0?	0?	0?	0?	0?	0?	0?	0?	63-	0?	0?	0?	0?	0?	0?	0?	0?	0?	0?	0?	0?	0?	0?	0?	0?	0?	0?	0?	0?	0?	0?	0?	0?	0?	0?	0?	0?	0?	0?	0?	0?	0?	0?	0?	0?	0?	0?	0?	0?	0?	0?	0?	0?	0?	0?	68-	0?	0?	0?	0?	0?	0?	0?	0?	0?	0?	0?	0?	0?	0?	0?	0?	0?	0?	0?	0?	0?	0?	0?	0?	0?	0?	0?	0?	0?	0?	0?	68-	0?	0?	0?	0?	0?	0?	0?	0?	0?	0?	0?	0?	N	0?	0?	0?	0?	0?	0?	0?	0?	0?	0?	0?	0?	0?	0?	0?	0?	0?	0?	0?	0?	0?	0?	0?	0?	0?	0?	0?	0?	0?	0?	0?	0?	0?	0?	0?	0?	0?	0?	0?	0?	0?	0?	0?	0?	0?	0?	0?	0?	0?	0?	0?	0?	0?	0?	0?	0?	0?	0?	0?	0?	0?	0?	0?	0?	0?	0?	0?	0?	0?	0?	0?	0?	0?	0?	0?	0?	0?	0?	0?	0?	0?	0?	0?	0?	0?	0?	0?	0?	0?	0?	0?	68-	0?	0?	0?	0?	0?	0?	0?	0?	11-	0?	0?	0?	0?	0?	0?	0?	0?	0?	0?	68-	0?	0?	0?	0?	0?	0?	0?	0?	0?	0?	0?	0?	0?	0?	0?	0?	0?	0?	0?	0?	0?	0?	0?	0?	0?	0?	0?	0?	0?	0?	0?	0?	0?	0?	0?	0?	0?	0?	0?	0?	0?	0?	0?	0?	0?	0?	0?	0?	0?	0?	0?	0?	0?	0?	0?	0?	0?	0?	0?	0?	0?	0?	0?	0?	0?	0?	0?	0?	0?	0?	0?	0?	0?	0?	0?	1-	0?	0?	0?	0?	0?	0?	0?	0?	0?	0?	0?	0?	0?	0?	0?	0?	0?	0?	0?	0?	0?	0?	0?	0?	0?	0?	0?	0?	0?	0?	0?	0?	0?	0?	0?	0?	0?	0?	11-	0?	0?	68-	0?	0?	0?	0?	0?	0?	0?	0?	0?	0?	0?	0?	0?	0?	0?	0?	0?	0?	0?	0?	0?	0?	0?	0?	0?	0?	0?	0?	0?	0?	0?	0?	0?	0?	0?	0?	0?	0?	0?	0?	0?	0?	0?	0?	0?	0?	68-	0?	0?	0?	68-	0?	0?	0?	0?	0?	0?	0?	0?	68-	0?	0?	0?	0?	0?	0?	0?	0?	0?	0?	0?	0?	0?	0?	0?	0?	0?	0?	0?	0?	0?	0?	0?	0?	0?	0?	0?	0?	0?	0?	0?	0?	0?	0?	0?	0?	0?	0?	0?	0?	0?	0?	0?	0?	0?	0?	0?	0?	0?	0?	0?	0?	0?	0?	0?	0?	0?	0?	0?	0?	0?	0?	0?	0?	0?	34-	0?	0?	0?	0?	0?	0?	0?	0?	0?	0?	0?	0?	0?	0?	0?	0?	35-	0?	0?	0?	0?	0?	0?	0?	0?	0?	0?	0?	0?	0?	0?	0?	0?	0?	0?	0?	0?	0?	0?	0?	0?	0?	0?	0?	0?	0?	0?	0?	0?	68-	0?	0?	0?	0?	0?	0?	0?	0?	0?	0?	68-	0?	0?	0?	0?	0?	0?	0?	0?	0?	0?	0?	0?	0?	0?	0?	0?	0?	0?	0?	0?	0?	0?	0?	0?	0?	0?	0?	0?	0?	0?	0?	0?	0?	1-	0?	0?	0?	0?	0?	0?	0?	0?	0?	0?	0?	0?	0?	0?	0?	0?	0?	0?	0?	0?	0?	0?	0?	0?	0?	0?	0?	0?	0?	0?	0?	68-	0?	0?	0?	0?	0?	0?	0?	0?	0?	0?	0?	0?	0?	0?	0?	0?	0?	0?	0?	0?	0?	0?	0?	0?	0?	0?	0?	0?	0?	0?	0?	0?	0?	0?	0?	0?	0?	0?	0?	0?	0?	0?	0?	0?	0?	0?	0?	0?	0?	0?	0?	0?	0?	0?	0?	0?	0?	0?	0?	0?	0?	0?	0?	0?	0?	0?	0?	0?	0?	0?	0?	0?	0?	0?	0?	0?	0?	0?	0?	68-	0?	0?	N	0?	0?	0?	0?	0?	0?	0?	0?	0?	0?	0?	0?	0?	0?	0?	0?	0?	0?	0?	0?	0?	68-	0?	0?	0?	0?	0?	0?	0?	0?	0?	0?	0?	0?	0?	0?	0?	0?	0?	0?	0?	0?	0?	0?	0?	0?	0?	0?	0?	0?	0?	0?	0?	0?	0?	0?	0?	0?	0?	0?	0?	0?	0?	0?	0?	0?	0?	0?	0?	0?	0?	0?	0?	0?	0?	0?	0?	0?	0?	0?	0?	0?	0?	0?	0?	0?	0?	0?	0?	0?	0?	0?	0?	0?	0?	0?	0?	0?	0?	0?	0?	0?	0?	0?	0?	0?	68-	0?	0?	0?	0?	0?	0?	0?	0?	0?	0?	0?	0?	0?	0?	0?	0?	0?	0?	0?	0?	0?	0?	0?	0?	0?	0?	0?	0?	0?	0?	0?	0?	0?	0?	0?	0?	0?	0?	0?	0?	0?	0?	0?	0?	0?	0?	0?	0?	0?	0?	0?	0?	0?	0?	0?	0?	0?	0?	0?	0?	0?	0?	0?	0?	0?	0?	0?	0?	0?	0?	0?	0?	0?	0?	0?	0?	0?	N	20	76-	0?	0?	0?	0?	0?	0?	0?	0?	0?	0?	0?	N	0?	0?	0?	0?	0?	0?	68-	0?	0?	0?	0?	0?	0?	0?	0?	0?	0?	0?	0?	0?	0?	0?	0?	0?	0?	0?	0?	0?	0?	36	0?	0?	0?	0?	0?	0?	0?	0?	0?	0?	0?	0?	N	0?	0?	0?	68-	0?	0?	0?	0?	0?	0?	0?	0?	0?	0?	0?	0?	0?	18-	0?	0?	0?	0?	0?	0?	0?	0?	0?	0?	0?	0?	0?	0?	0?	0?	0?	0?	0?	0?	0?	0?	0?	0?	0?	0?	0?	0?	0?	0?	0?	0?	0?	0?	0?	0?	0?	0?	0?	0?	0?	0?	0?	0?	0?	0?	0?	0?	0?	0?	68-	0?	0?	0?	0?	0?	0?	0?	0?	0?	0?	0?	0?	0?	0?	0?	0?	0?	0?	0?	0?	0?	0?	0?	0?	0?	0?	0?	0?	0?	0?	0?	0?	0?	0?	0?	0?	0?	0?	27-	0?	0?	0?	0?	0?	0?	0?	0?	0?	0?	0?	0?	0?	0?	0?	0?	0?	0?	0?	0?	0?	0?	0?	0?	0?	0?	0?	0?	0?	0?	0?	0?	0?	0?	0?	0?	0?	0?	0?	0?	0?	0?	0?	0?	0?	0?	0?	0?	0?	0?	0?	0?	0?	0?	0?	0?	0?	0?	0?	0?	0?	0?	0?	0?	0?	0?	0?	0?	0?	68-	0?	0?	0?	0?	0?	0?	0?	2-	0?	0?	0?	0?	0?	0?	0?	0?	0?	0?	0?	0?	0?	0?	0?	0?	0?	0?	0?	0?	0?	0?	0?	0?	0?	0?	0?	2-	0?	0?	0?	0?	0?	0?	0?	0?	0?	0?	68-	0?	0?	0?	0?	0?	0?	0?	0?	0?	0?	0?	0?	0?	0?	0?	0?	0?	0?	0?	0?	0?	0?	0?	0?	0?	0?	0?	0?	0?	68-	0?	0?	0?	0?	0?	0?	0?	0?	0?	0?	0?	0?	0?	0?	0?	0?	0?	0?	0?	0?	0?	0?	0?	0?	0?	0?	0?	0?	0?	0?	0?	0?	0?	0?	0?	0?	0?	0?	0?	0?	0?	0?	0?	0?	0?	0?	0?	0?	0?	0?	0?	0?	0?	0?	0?	0?	0?	0?	0?	0?	0?	0?	0?	0?	2-	0?	0?	0?	0?	0?	0?	0?	0?	0?	0?	0?	0?	N	26	0?	0?	0?	0?	0?	0?	0?	0?	0?	0?	0?	0?	0?	0?	0?	0?	0?	0?	0?	0?	0?	0?	0?	0?	0?	0?	0?	0?	0?	0?	0?	0?	0?	2-	0?	0?	0?	0?	0?	0?	0?	0?	0?	0?	0?	0?	0?	68-	0?	0?	0?	0?	0?	0?	0?	0?	0?	18-	0?	0?	0?	0?	0?	0?	0?	0?	0?	0?	0?	0?	0?	0?	0?	0?	0?	0?	0?	0?	0?	0?	0?	0?	0?	0?	0?	0?	0?	68-	0?	0?	0?	0?	0?	0?	0?	0?	0?	0?	0?	0?	0?	0?	0?	0?	0?	0?	0?	0?	0?	0?	0?	0?	0?	0?	0?	0?	0?	0?	0?	0?	0?	0?	0?	0?	0?	0?	0?	0?	0?	0?	0?	0?	0?	0?	0?	0?	0?	0?	0?	0?	0?	0?	0?	0?	0?	0?	0?	0?	0?	0?	0?	0?	0?	0?	0?	0?	0?	0?	0?	0?	0?	0?	0?	0?	0?	N	0?	0?	0?	0?	0?	0?	0?	0?	0?	0?	0?	0?	0?	0?	0?	0?	0?	0?	0?	0?	0?	0?	0?	0?	0?	0?	0?	68-	0?	0?	0?	0?	0?	0?	0?	0?	0?	0?	N	N	17-	2	0?	0?	N	N	N	N	50-	54-	N	N	42-	N	N	N	0?	70-	N	0?	0?	N	N	55-	0?	0?	0?	0?	0?	0?	0?	0?	0?	0?	0?	0?	0?	0?	0?	0?	0?	0?	0?	0?	0?	0?	0?	0?	0?	0?	0?	0?	0?	0?	0?	0?	0?	0?	0?	0?	0?	0?	0?	0?	0?	0?	0?	0?	0?	0?	0?	0?	0?	0?	0?	0?	0?	0?	0?	0?	0?	0?	0?	0?	0?	0?	0?	0?	48	0?	0?	52-	0?	0?	0?	0?	0?	0?	0?	0?	0?	0?	0?	68-	0?	0?	0?	0?	0?	0?	0?	0?	0?	0?	0?	0?	0?	0?	0?	0?	0?	0?	0?	0?	0?	0?	0?	0?	0?	0?	0?	0?	0?	0?	0?	0?	0?	0?	0?	0?	0?	0?	0?	0?	0?	0?	0?	0?	0?	0?	0?	0?	0?	0?	0?	0?	0?	0?	0?	0?	0?	0?	0?	0?	0?	0?	0?	0?	0?	0?	0?	0?	0?	0?	0?	0?	0?	0?	0?	0?	0?	0?	0?	0?	0?	0?	0?	0?	0?	0?	0?	0?	0?	0?	0?	0?	0?	0?	0?	0?	0?	0?	0?	0?	0?	0?	0?	0?	0?	0?	0?	0?	0?	0?	0?	0?	0?	0?	0?	68-	0?	0?	0?	0?	0?	0?	0?	0?	0?	0?	0?	0?	0?	0?	0?	0?	0?	0?	0?	0?	0?	0?	0?	0?	0?	0?	0?	0?	0?	0?	0?	0?	0?	0?	0?	0?	0?	0?	0?	0?	0?	0?	0?	0?	0?	0?	0?	0?	0?	0?	0?	0?	0?	0?	0?	0?	0?	0?	0?	0?	0?	0?	0?	0?	0?	68-	0?	0?	0?	0?	18-	0?	0?	0?	0?	0?	0?	0?	0?	0?	0?	0?	0?	0?	0?	0?	0?	0?	0?	0?	0?	0?	0?	0?	0?	0?	0?	18-	0?	0?	0?	0?	0?	0?	0?	0?	0?	0?	0?	0	0
GCA_000248255.2_ASM24825v2_genomic.fna	4	60	6	6	6	1	2	1	6	6	2	6	3	3	6	6	6	6	12	6	1	5	6+	6	3	0?	6	5	5	35	2	5	6	23	5	5	6	6	6	6	5	6	6	6	50	6	6-	6	3	34	6	6	5	32	35	45	41	43	1	46	40	167	28	44	43	69	43	79	64	47	40	42	66	36	36	5	23	60	N	32	42	6	6	6	56	63	21	52	6	6	6	16	13	8	13	12	15	18	5	13	15	14	12	11	13	17	16	N	17	15	16	13	3	5	1	1	6	31	12	41	19	39	28	37	43	6	6	6	6	6	5	6	6	N	6	6	4-	N	6	6	6	5	5	5	6	6	5	42	5	6	N	6	6	6	5	6	1	1	1	1	46	1	1	1	1	6	6	102	5	5	6	4	1	1	1	6	1	1	1	1	1	1	1	1	1	1	1	80	1	1	1	1	1	1	1	6	4	1	1	1	1	1	1	1	1	1	1	1	1	1	1	1	1	1	1	1	1	1	65	1	1	1	1	1	1-	1	1	1	6	1	1	1	1	1	1	1	1	N	1	1	1	1	1	1	1	1	N	1	1	1	1	1	1	1	1	1	1	1	256-	N	1	1	1-	1	1	1	1	1	1	1	1	N	1	1	1	54-	1	1	1	1	1	1	1	1	1	1	1	1	1	N	1	1	1	1	1	1	1	1	1	1	1	92	54	1	1	1	1	1	1	1	1	1	1	1	N	1	1	1	1	1	1	1	1	1	1	1	1	1	1	1	1	1	1	1	1	1	1	1	1	1	1	1	1	1	1	1	1	N	1	1	1	1	1	1	1	1	1	1	1	1-	1	1	41	1	1	1	1	1	N	1	1	230-	1	1	1	1	1	1	1	1	N	1	1	1	1	1	1	1	1	1	1	1	1	1	1	6	1	1	1	1	1	1	1	1	1	1	1	1	1	1	1	1	1	1	N	1	1	6	13	1	1	1	1	1	N	1	1	1	1	1	1-	1	1	1	1	1	1	1	1	1	1	1	1	1	1	1	1	1	1	1	1	1	1	1	1	1	1	1	1	1	1	1	153-	1	1	1	1	1	1	1	1	1	N	1	1	1	1	1	1-	1	1	1	1	6	0?	1	1	1	1	1	1	1	1	1	1	1	454-	1	1	1	1	1	1	1	1	1	1	1	1	1	1	1	1	92	1	1	1	1	1	1	1	1	43	1	1	1	1	1-	6	1	1	1	1	1	1	1	1-	1	1	3	1	1-	1	1	1	1	N	1	1	1	1	1	1	1	1	1	6	1-	1	1	1	1	N	1	1	1	1	1	1	1	1	1	1	1	1	1	1	1	1	6	N	1	1	1	1	1	1	1	6	1	1	1	6	1	1	1	1	1	1	1	1	1	1	1	1	1	1	1	70	1	1	1	1	1	1	1	1	549-	N	1	1	1	1	1	1	1	1	1	1	1	N	1	N	1	1	1	1	1	1	N	1	1	1	1	1	1	6	1	1	430-	4	4	4	6	4	6	6	6	4	4	4	4	4	6	4	4	4	3	4	4-	4	4	4-	6	3	4	4	4	4-	4	4	4-	57	1	1	1	N	1	1	1	318-	1-	1	1	1-	94-	6	1	6	1	N	1	1	1	1	1	1	1	1	1	1	1	1	1	1	1	1	1	1	1	1	1	1	N	1	1	1	1	N	53	1	1	1	1	1	1	1	1	1	1	N	1	1	1	1	1	1	N	1	6	1	1	1	165-	1	1	1	1	0?	1	1	1	N	1	49	1	1	1	1	N	1	1	1	1	1	50	1	1	1	1	270-	1	1	1	1	1	1	1	352-	1	1	1	6	1	1	11-	1	1	1	1	1	0?	1	1	1	1	1	1-	1	1	1	1	1	24	N	55-	1	1	1	1	1	1	1	33	1	1	1	1	1	1	1	1	66-	1	1	1	1	1	108	1	1	N	1	1	1	1	1	1	1	N	1	57-	1	1-	1	1	1-	1	1	1	1	1	1-	1	1	1	N	1	1-	1	1-	6	1-	1	1	1-	N	1	1	N	1	0?	0?	N	N	1	1	1	N	31-	1	1	0?	1	1	0?	1	1	1	67-	1	N	1	1	N	1	N	1	1	1-	1	1	1	0?	1	1	1	N	N	213-	1	0?	1	N	1	1	1	1	1	1	1	1	1	1	1	1-	N	0?	1	1	N	1	1	1	1	1	1	1	1	N	1	1	1	1	1	1	1	1	N	154-	0?	6	1	1	1	N	1-	0?	1	1	1	N	1	122-	1	1	N	1	1	1-	N	N	1	N	1	1	0?	160-	1	1	N	1	1	1	1	1	1	1	1	1	0?	1	1	1	1	1	1	57-	158-	1	1	1	1	N	1	1	1	285-	1	0?	1	1-	1	N	1	1-	N	1	0?	N	1	0?	1	1	1	1	1	1	1	162-	1	1	1	0?	1	1	6	1	1	1	1	1	1	1	1-	1	N	1	N	1	1	1	N	1	N	1-	1	1	1	1	1	1-	0?	1	1	5	1	1	1	N	1	1-	1	1	1	1	1	1	0?	1	1	1	8	41-	80-	192-	0?	1	1	0?	1	N	1	1	1-	1	6	1	1	1	1	1	1	1	1	1	1	N	1	1	1-	1	1-	1	1-	1-	1	1	1	1	1	1	44	1	1	1	1	1	184-	1	1	1	1	1	1	1	1	1	0?	39	1	1	88-	31-	0?	1	1	0?	1	65-	1	1	1	1	1	6	0?	6	1	1	143-	1	140-	1	1	1	1	1-	N	191-	N	515-	1-	1	1	0?	1	1	1	137-	N	1-	1	1	1	1	1	1	1	1	N	1	1	1	108-	N	N	N	1	1	1	1	N	1	1	1	1	1	1-	1	1	90-	1	N	353-	1	1	1	1	1	430-	1-	N	1	N	1	N	1	1-	1	246-	N	46	1	N	1	1	1	0?	1-	0?	1-	1	N	1	1	N	1	1-	0?	345-	1	288-	N	6	1	N	1	1	N	1	90-	1	1	1	N	1	1	1	1	1	1	1	1	1	1-	1	1-	1	1	1-	N	91-	1-	1	1	N	6	217-	1	N	N	1	1-	240-	0?	1-	1	1	1	1	1	1	1	1	0?	1	1	1	1	1	1	1	1	1	1	N	1	1	180-	155-	1	1	1	1	1	1	1	1	1	1	1	6	69	1	1	1	6	1-	1	33-	1	1	N	1	1	1	1	N	1	1	N	0?	1	1	150-	1	1	1-	1	1	258-	N	0?	0?	N	0?	1	N	1	102-	0?	1	1	1	1	1	0?	1	1	1	1-	1	1	N	1	N	N	N	1	1	1-	1	1	6-	1	1	1	N	1-	6	1-	1	1-	1	N	N	N	0?	1-	1	1	1	1	N	0?	N	46	1	1	1	1	1	1	N	361-	0?	1	1	1	1	1-	6	1	1	1-	1	N	1	1	1	69	1	1	1	N	1	6	169-	1	1	1	1	1	1	1	1	1	1	1	1	N	1	1-	1	N	1	1	1	1	1	1	231-	1	1	1	1	1	1	1	1	31-	N	1	1	1	1	N	1	N	1	6	N	1	1-	N	1	1	1	1	102-	1	1	1-	1	1	1	1	117-	N	1	1	1	29-	68-	1	1	1	1	1	1	N	1	1	1-	1	27	1	1	91-	1	1	1	1	1	6	1	1	1-	6	1	6	1	1	1	N	1	1	1	1	1	46	1	1	1	1	1	1	1	1	1	N	1	225-	1-	N	1	6	5	N	5	6	5	188-	5	5	5	240-	5	4	5	5	1	6	6	1	1	6	6	0?	5	N	1	N	1	1	1	1	1	1	1-	1	1	1	1-	1	1	1	1	1	1	1	1	1	1	1	1	N	N	1	1	1	1	1	1	1	1	1	1	1	1	1	N	1+	1	1	1	6	1	1	287-	1	1	201-	1	N	1	1	N	1	5-	1	1	32	1	1	1	1	1	1	1	1	1	1	1	1	1-	0?	1	1	1	N	1	1-	1	1	1	1	N	1	1	1	N	1	1	1	1	1-	1	1	1	1	1	N	1	N	1	1	1	1	1	1	1	1-	6	1	1	1	1	N	1	N	1	1	1	1	1	1	1	1	1	1	1	1	1	1	1	1	1	1	1	6	1	0?	1	1	1	1	1	1	1	1	1	1	1	1	1	1	1	1	1	N	1	39	1	1	1	1	6	1	1	1	1	1	1	1	1	1	N	1-	1	1	1	1	6	1	1	N	1	N	1	1	1	1	1	N	6	N	N	1	1	1-	1	1	1	1	1	1	1	1	1	56	98	1	1	1	1	6	1	1	1	1	0?	1	1	1	1	1	1	1	1	1	1	1	1	1	1	1	1	1	1	N	1	1	1-	1	1	1	1	1	1	1	1	1	1	1	1	1	1	1	1	1	1	1	1-	1	6	1	N	1	1	1	1	127-	1	1	1	1	N	1	1	1	1	1	N	1	1-	1	1	1	1-	1	1	1	1	1	1	1	1	1	1	1	1	1	1	1	1	1	1	1	1	N	1	1	1	1	N	1	1	1	53	1	1	1	1	1	1	1	1	1	1	1	1	1	1	1	1	1	1	N	1	66	1	1	1	1	1	1	6	1	1	66	1	1	1	1	1	1	1	1	1	1	1	1	1	1	1	1	1	1	1	1	1	1	1	6	1	1	1	33	N	1-	1	1	4	0?	N	1	122-	1	1	1	1	1	1	1-	1	1-	1	1	1	1	1	1	1	1	1	6	1	1	1	1	1	1	1	1	1	1	1	1	1	1	1	1-	1	1	1	1	1	1	1	1	1	1	1	1	1	1	N	1	1	N	1	1	1	1	1	1	1	1	1	1	1	1	1	1	N	1	1	3	1	1	1	1	1	1	1	1	3	1	1	1	1	1	1	1	1	1	1	1	1	1	1	1	1	1	1	N	1	1	1	1	1	1	1	1	1	1	N	1	1	1	1	1	1	1-	1	1	1	1	1	1	1	1	1	N	1	1	1	1	1	1	1	1	1	1	1	1	1	1	3	1	1	1	1	1	1	N	1	1	1	1	N	1	N	1	N	6	1	1	1	1	1	1	N	6	6	6	6	6	9	2	N	1	2	5	1	1	1	6	N	6	3	6	6	6	6	6	N	N	6	6	6	61	1	5	6	1	6	6	6	5	6	N	6	6	6	N	6	6	N	6	6	6	6	6	6	6	6	6	6	39	17	9	16	37	6	6	6	16	6	6	6	6	6	6	6	16	3	3	3	3	3	3	3	3	3	3	6	3	3	3	3	3	N	6	6	12	6	32	4	6	6	6-	N	6	54	6	5	5	6	6	35	13	6	6	34	5	1	6	6	2	34	14	41	12	37	17	17	16	3	44	6	6	4	5	6	6	6	5	3	6	5	6	6	6	6	6	6	6	6	6	6	6	6	6	6	6	6	6	46	56	6	6	2	1	6	6	6	3	3	80-	6	6-	6	86	6	6	5	46	3	3	3	39	3	3	3	3	3	31	41	17	3	3	3	3	3	3	2	35	3	2	3	3	3	3	1	3	3	208-	34	71	30	34	3	N	1	45	60	30	54	36	38	38	3	3	40	6	4	5	5	6	6	5	5	71	39	6	13	6-	0	0
GCA_000248275.2_ASM24827v2_genomic.fna	4	60	6	6	6	1	2	1	6	6	2	6	3	3	N	6	6	6	12	6	1	5	6+	6	3	6	6	5	5	35	2	5	6	23	5	N	6	6	6	6	5	6	6	6	50	6	6	6	3	34	6	6	5	32	35	45	41	43	1	46	40	167	28	44	43	69	43	79	64	47	40	42	66	36	36	5	23	60	38	32	42	6	6	6	56	63	21	52	6	6	6	16	13	8	13	12	15	18	5	13	15	14	12	11	13	17	16	16	17	15	16	13	3	5	1	1	6	31	12	41	19	39	28	37	43	6	6	6	6	6	5	6	6	N	6	6	4	6	6	6	6	5	5	5	6	6	5	42	5	6	6	6	6	6	5	6	1	1	1	1	46	1	1	1	1	6	6	102	5	5	6	4	1	1	1	6	1	1	1	1	1	1	1	1	1	1	1	80	1	1	1	1	1	1	1	6	4	1	1	1	1	1	1	1	1	1	1	1	1	1	1	1	1	1	1	1	1	1	65	1	1	1	1	1	1	1	1	1	6	1	1	1	1	1	1	1	1	1	1	1	1	1	1	1	1	1	1	1	1	1	1	1	1	1	1	1	1	1	1	1	1	1	1	1	1	1	1	1	1	1	1	1	1	1	1	54	1	1	1	1	1	1	1	1	1	1	1	1	1	N	1	1	1	1	1	1	1	1	1	1	1	92	54	1	1	1	1	1	1	1	1	1	1	1	1	1	1	1	1	1	1	1	1	1	1	1	1	1	1	1	1	1	1	1	1	1	1	1	1	1	1	1	1	1	1	1	1	1	1	1	1	1	1	1	1	1	1	1	1	1	1	1	41	1	1	1	1	1	1	1	1	1	1	1	1	1	1	1	1	1	1	1	1	1	1	1	1	1	1	1	1	1	1	1	1	6	1	1	1	1	1	1	1	1	1	1	1	1	1	1	1	1	1	1	1	1	1	6	13	1	1	1	1	1	1	1	1	1	1	1	1	1	1	1	1	1	1	1	1	1	1	1	1	1	1	1	1	1	1	1	1	1	1	1	1	1	N	1	1	1	1	1	1	1	1	N	1	1	1	1	1	1	1	1	1	1	1	1	1	1	1	1	1	6	1	1	1	1	1	1	1	1	1	1	N	1	1	1	1	1	1	1	1	1	1	1	1	1	1	1	1	1	1	92	1	N	1	1	1	1	1	1	43	1	1	1	1	1	6	1	1	1	1	1	1	1	1	1	1	3	1	1	1	1	1	1	1	1	1	1	1	1	1	1	1	1	6	1	1	1	1	1	1	1	1	1	1	1	1	1	1	1	1	1	1	1	1	1	1	6	N	1	1	1	1	1	1	1	6	1	1	1	6	1	1	1	1	1	1	1	1	1	1	1	1	1	1	1	70	1	1	1	1	1	1	1	1	N	1	1	1	1	1	1	1	1	1	1	1	1	1	1	1	1	1	1	1	1	1	1	1	1	1	1	1	1	6	1	1	4	4	4	4	6	4	6	6	6	4	4	4	4	4	6	4	4	4	3	4	4	4	4	4	6	3	4	4	4	4	4	4	4	57	1	1	1	1	1	1	1	1	1	1	1	1	1	6	N	6	1	1	1	1	1	1	1	1	1	1	1	1	1	1	1	1	1	1	1	1	1	N	1	1	1	1	1	1	1	1	53	1	1	1	1	1	1	1	1	1	1	1	1	1	N	1	1	1	1	1	6	1	1	1	1	1	1	1	1	1	1	1	1	1	1	49	1	1	1	1	N	1	1	1	1	1	50	1	1	1	1	1	1	1	1	1	1	1	1	1	1	1	1	6	N	1	1	1	1	1	1	1	1	1	1	1	1	1	1	1	1	1	1	N	24	6	1	1	1	1	1	1	1	1	33	1	1	1	1	1	N	1	1	1	1	1	1	1	1	108	1	1	1	1	1	1	1	1	1	1	1	1	N	1	N	1	1	1	1	1	1	1	1-	N	1	1	1	1	1	1	1	1	6	1	1	1	1	1	1	1	1	1	1	N	1	1	1	1	1	1	1	1	1	1	1	1	44	1	1	1	67	1	N	1	1-	N	1	1	1	1	1	1	1	1	1	1	1	1	1	1	1	1	N	1	1	1	1	1	1-	1	1	1	1	1	1	1	1	44	1	1	N	1	1	1	1	1	1	1	1	1	1	1	1	1	1	N	N	1	1	1	1	1	6	227-	1	1	1	1	1	1	1	1	1	1	6	1	1	1	1	1	1	1	1	1	N	1	1	1	1	1	1	1	1	1	1	N	1	1	1	1	1	1	1	1	1	1	1	1	1	1	1	1	1	217-	1	1	1	1	1-	1	1	70-	1	1	1	N	1	1	1	1	N	1	1	1	1	114-	1	1	1	1	1	1	N	1	1	N	1	6	1	1	1	1	1	1	1	1	1	N	1	1	1	1	1	N	1	1	1	1	1-	1	1	1	1	N	N	1-	N	1	N	1	1	1	1	1	1	1	1	N	N	1	1	1	1	8	1	80	1	0?	N	1	1	1	1	1	1	1	1	6	1	1	1	1	1	1	1	1	1	1	1	1	1	1	1	1	1	1	1	1	1	1	1	1	1	44	1	1	1	1	1	1	1	1	1	1	1	1	1	1	1	1	39-	1	1	1	1	1	1	1	1	1	1	1	1	1	1	1	6	N	6	1	1	1	1	1	1	1	1	1	1	1	1	1	N	1	1	1	N	1	1	1	1	N	1	1	1	1	1	1	1	1	1	N	1	1	1	1	1	1	N	1	N	1	1	1	1	1	1	1	1	1	1	1	6	1	1	1	1	1	1	1	1	1	1	1	N	N	1	1	1	1	1	1	41	46	1	1	1	1	1	1	1	1	1	1	1	N	1	80	1	1	1	1	1	N	1	6	1	1	1	1	1	1	90	1	1	1	1	1	1	1	1	1	1	1	1	1	1-	1	1	1	1	1	1	1	1	1	1	1	6	1	N	1	1	1	1	1-	1	1	1	1	1	1	1	1	1	1	1	N	1	1	1	1	1	1	1	1	1	1	1	1	1	1	1	1	1	1	1	1	1	1	1	1	1	6	69	1	1	1	6	1	1	1	1	1	N	1	1	1	1	1	1	1	1	6	1	1	1	1	1	1	1	1	6	1	1	N	1	1	1	1	1	1	1	1	1	1	1	1	1	1	1	1	1	1	1	1	1	1	1	1	1	1	1	1	1	6	1	1	1	1	1	6	1	1	1	1	1	1	N	1	1	1	1	1	1	1	1	1	46	1	1	1	1	1	1	N	1	1	1	1	1	1	1	6	1	1	1	1	1	1	1	1	69	1	1	1	1	1	6-	1	1	1	1	1	1	1	1	1	1	1	1	1	1	1	1	1	1	1	1	1	1	1	1	1	1	1	1	1	1	1	1	1	N	1+	1	1	1	N	1	1	N	224-	6	1	N	N	1	1	1	1	1	1	1	1	1	1	1	1	1	1	1	1	1	1	1	1	1	1	1	N	1	1	1	1	1	1	1-	N	1	1	1	1	1	1	1	1	6	1	1	1	N	1	6	1	1	1	0?	1	1	N	1	1	N	1	1	1	1	N	1	1	1	1	1	1	1	1	1	1	6	5	5	5	6	5	5	5	5-	5-	6	5	4	5	5	1	6	6	1	1	6	6	5	5	5	1	N	1	1-	1	N	1	1	1	1	1	1	1	1	1	1	1	N	1	1	1	1	1	1	1	0?	1	1	1	1	1	1	1	1	1	1	1	1	1	1	1	1+	1	1	1	6	1	1	1	1	1	1	1	1	1	1	1	1	5	1	1	32	N	1	1	1	1	1	1	1	1	1	1	1	1-	1	1	1	1	1	1	1	1	1	1	1	1	1	1	1	1	1	1	1	N	1	1	1	1	N	1	1	1	1	N	1	1	1	1	1	1	1	6	1	1	1	1	1	1	1	1	1	1	1	1	1	1	1	1	1	1	1	1	1	1	N	1	1	1	6	1	1	1	1	1	1	1	1	1	1	1	1	1	1	1	1	1	1	1	1	1	39	1	1	1	1	6	1	1	1	1	1	1	1	1	1	N	1	1	1	1	1	6	1	1	1	1	1	1	1	1	1	1	1	6	N	6	1	1	1	1	1	1	1	1	1	1	1	1	56	98	1	1	1	1	6	1	1	1	1	1	1	1	N	1	1	1	1	1	1	1	1	1	1	1	1	1	1	1	1	1	1	1	1	1	1	N	1	1	1	1	1	1	1	1	1	1	1	1	1	1	1	1	1	6	1	1	1	1	1	1	1	1	1	1	1	1	1	1	1	1	1	1	1	1	1	1	1	1	1	1	1	1	1	1	1	1	1	1	1	1	1	1	1	1	1	1	1	1	1	1	1	1	1	1	1	1	1	N	1	1	1	1	1	1	1	1	1	1	1	1	1	1	1	1	1	1	1	1	66	1	1	1	N	1	1	6	1	1	66	1	1	1	1	1	1	1	1	1	1	1	1	1	1	1	1	1	1	1	1	1	1	1	6	1	1	1	33	1	1	1	1	4	1	1	1	1	1	1	1	1	1	1	1	1	1	1	1	1	1	1	1	1	1	1	6	1	1	1	1	1	1	1	1	1	1	1	1	1	1	1	1	1	1	1	1	1	1	1	1	1	1	1	1	1	1	1	1	1	1	1	1	1	1	1	1	1	N	1	1	1	1	1	1	1	1	1	3	1	1	1	1	1	1	1	1	3	1	1	1	1	1	1	1	1	1	1	1	1	1	1	1	1	1	1	1	1	1	1	1	1	1	1	1	1	1	1	N	1	1	1	1	1	1	1	1	1	1	1	1	1	1	1	1	1	1	1	1	1	1	1	1	1	1	1	N	1	1	3	1	1	1	1	1	1	1	1	1	1	1	1	1	1	1	32	6	1	1	1	1	1	1	6	6	6	6	6	6	9	2	6	1	2	5	1	1	1	6	6	6	3	6	6	6	6	6	6	6	6	6	6	61	1	5	6	1	6	6	6	5	6	6	6	6	6	6	6	6	6	6	6	N	6	6	6	6	6	6	6	39	17	9	16	37	6	6	6	16	6	6	6	6	6	6	216-	16	3	3	3	3	3	3	3	3	3	3	6	3	3	3	3	3	16	6	6	12	N	32	4	6	6	6	6	6	54	6	5	5	6	6	35	13	6	6	34	5	1	6	6	2	34	14	41	12	37	17	17	16	3	44	6	6	4	5	6	6	6	5	3	6	5	6	6	6	6	6	6	6	6	6	6	6	6	6	6	6	6	6	46	56	6	6	2	1	6	6	6	3	3	6	6	6	6	86	6	6	5	46	3	3	3	39	3	3	3	3	3	31	41	17	3	3	3	3	3	3	2	35	3	2	3	3	N	3	1	3	3	3	34	71	30	34	3	38	1	45	60	30	54	36	38	38	3	3	40	6	4	5	5	6	6	5	5	71	39	6	13	6-	0	0
GCA_000282795.3_ASM28279v3_genomic.fna	4	6	6	6	6	1	2	1	6	6	2	6	3	3	6	6	6	6	6	6	1	5	6+	6	3	6	6	5	5	6	2	5	6	6	5	5	6	6	6	6	5	6	6	6	6	6	6	6	3	6	6	6	5	6	6	6	6	6	1	6	6	5	5	6	6	6	6	6	6	6	6	6	6	6	6	6	6	6	6	6	6	6	6	6	6	6	6	6	6	6	6	6	5	6	5	6	6	6	6	5	6	5	6	5	5	6	6	6	5	6	6	6	3	5	1	2	2	5	2	6	4	6	6	6	5	6	6	6	6	6	5	6	6	N	6	6	4	6	6	6	6	5	5	5	6	6	5	6	5	6	6	6	6	6	5	6	1	1	1	1	6	1	1	1	1	6	6	5	5	5	6	4	1	1	1	6	1	1	1	1	1	1	1	1	1	1	1	1	1	1	1	1	1	1	1	6	4	1	1	1	1	1	1	1	1	1	1	1	1	1	1	1	1	1	1	1	1	1	1	1	1	1	1	1	1	1	1	1	6	1	1	1	1	1	1	1	1	1	1	1	1	1	1	1	1	1	1	1	1	1	1	1	1	1	1	1	1	1	1	1	1	1	1	1	1	1	1	1	1	1	1	1	1	1	1	6	1	6	1	1	1	1	1	1	1	1	1	1	1	1	1	1	1	1	1	1	1	1	1	1	1	1	1	1	1	1	1	1	1	1	1	1	1	1	1	1	1	1	1	1	1	1	1	1	1	1	6	1	1	1	1	1	1	1	1	1	1	1	1	1	1	1	1	1	1	1	1	1	1	1	1	1	1	1	1	1	1	1	1	1	1	1	1	1	1	1	1	1	1	1	1	1	1	1	1	1	1	1	1	1	1	1	1	1	1	1	1	1	1	1	1	1	1	1	1	6	1	1	1	1	1	1	1	1	1	1	1	1	1	1	1	1	1	1	1	1	1	6	6	1	1	1	1	1	1	1	1	1	1	1	1	1	1	1	1	1	1	1	1	1	1	1	1	1	1	1	1	1	1	1	1	1	1	1	1	1	1	1	1	1	1	1	1	1	1	1	1	1	1	1	1	1	1	1	1	1	1	1	1	1	1	1	1	6	1	1	1	1	1	1	1	1	1	6	1	1	1	1	1	1	1	1	1	1	1	1	1	1	1	1	1	1	1	1	1	1	1	1	1	1	1	1	1	1	5	1	1	1	6	1	1	1	1	1	1	1	1	1	1	3	1	1	1	1	1	1	1	1	1	1	1	1	1	1	1	1	6	1	1	1	1	1	1	1	1	1	1	1	1	1	1	1	1	1	1	1	1	1	1	6	1	1	1	1	1	1	1	1	6	1	1	1	6	1	1	1	1	1	1	1	1	1	1	1	1	1	1	1	1	1	1	1	1	1	1	1	1	1	1	1	1	1	1	1	1	1	1	1	1	1	1	1	1	1	1	1	1	1	1	1	1	1	1	1	1	1	6	1	1	4	4	4	4	6	4	6	6	6	4	4	4	4	4	6	6	1	1	1	1	1	1	1	1	1	1	1	1	1	1	1	1	1	1	1	1	1	1	1	1	1	1	1	1	1	1	1	6	1	6	1	1	1	1	1	1	1	1	1	1	1	1	1	1	1	1	1	1	1	1	1	1	1	1	1	1	1	1	1	1	1	1	6	1	1	1	1	1	1	1	1	1	1	1	1	1	1	1	1	1	6	1	1	1	1	1	1	1	1	1	1	1	1	1	1	1	1	1	1	1	1	1	1	1	1	1	1	1	1	1	1	1	1	1	1	1	1	1	1	1	1	1	1	6	1	1	1	1	1	1	1	1	1	1	1	1	1	1	1	1	1	1	1	1	1	6	1	1	1	1	1	1	1	1	1	1	1	1	1	1	1	1	1	1	1	1	1	1	1	1	1	1	1	1	1	1	1	1	1	1	1	1	1	1	1	1	1	1	1	1	1	1	1	1	1	1	1	1	1	1	1	1	6	1	1	1	1	1	1	1	1	1	1	6	1	1	1	1	1	1	1	1	1	1	1	1	1	1	1	1	1	1	1	1	1	1	1	1	1	1	1	1	1	1	1	1	1	1	1	1	1	1	6	1	1	1	1	1	1	1	1	1	1	1	1	1	1	1	1	1	1	1	1	1	1	1	1	1	1	1	1	1	1	1	1	1	1	1	1	1	1	1	6	1	1	1	1	1	1	1	1	1	1	1	6	1	1	1	1	1	1	1	1	1	1	1	1	1	1	1	1	1	1	1	1	1	1	1	1	1	1	1	1	1	1	1	1	1	1	1	1	1	1	1	1	1	6	1	1	1	1	1	6	1	1	1	1	1	1	1	1	1	1	1	1	1	1	1	1	1	1	1	1	1	1	1	1	6	1	1	1	1	1	1	1	1	1	1	1	1	1	1	1	1	1	1	1	1	1	1	1	1	1	1	1	1	5	1	1	1	1	1	1	1	1	1	1	1	1	1	1	1	1	6	1	1	1	1	1	1	1	1	1	1	1	1	1	6	1	1	6	1	1	1	1	1	1	1	1	1	1	1	1	1	1	1	1	1	1	1	1	1	1	1	1	1	1	1	1	1	1	1	1	1	1	1	1	1	1	1	1	1	1	1	1	1	1	1	1	1	1	1	1	1	1	1	6	438+	6	1	1	1	1	1	1	1	1	1	1	1	1	1	1	1	1	1	1	1	1	1	1	1	1	1	1	1	1	1	1	1	1	1	1	1	1	1	1	1	1	1	1	1	1	1	1	1	1	1	1	1	1	1	6	1	1	1	1	1	1	1	6	1	1	1	1	1	1	1	1	1	1	1	1	1	1	1	1	1	1	1	1	1	1	1	1	1	1	1	1	1	1	1	1	1	1	6	1	1	1	1	1	1	1	1	1	1	1	1	1	1	1	1	1	1	1	1	1	1	1	1	1	1	1	1	1	1	1	1	6	1	1	1	1	1	1	1	1	1	1	1	1	1	1	1	1	1	1	1	1	1	1	1	1	1	1	1	1	1	1	1	1	1	1	1	41	1	1	1	1	1	1	1	1	6	1	1	1	1	6	1	1	1	1	1	1	1	1	1	1	1	1	1	1	6	1	1	1	1	1	1	1	1	6	1	1	1	1	1	1	1	1	1	1	1	1	1	1	1	1	1	1	1	1	1	1	1	1	1	1	1	1	1	1	1	1	6	1	1	1	1	1	6	1	1	1	1	1	1	1	1	1	1	1	1	1	1	1	1	1	1	1	1	1	1	1	1	1	1	1	1	1	1	1	6	1	1	1	1	1	1	1	1	1	1	1	1	1	1	6	1	1	1	1	1	1	1	1	1	1	1	1	1	1	1	1	1	1	1	1	1	1	1	1	1	1	1	1	1	1	1	1	1	1	1+	1	1	1	1	1	1	1	1	6	149-	1	1	1	1	1	1	1	1	1	1	1	1	1	1	1	1	1	1	1	1	1	1	1	1	1	1	1	1	1	1	1	1	1	1	1	1	1	1	1	1	1	1	6	1	1	1	6	1	6	1	1	1	1	1	1	1	1	1	1	1	5	1	1	1	1	1	1	1	1	1	1	1	1	1	6	5	5	5	6	5	5	5	5	5	6	5	4	5	5	1	6	6	1	1	6	6	5	5	5	1	1	1	1	1	1	1	1	1	1	1	1	1	1	1	1	1	1	1	1	1	1	1	1	1	1	1	1	1	1	1	1	1	1	1	1	1	1	1	1	1	1+	1	1	1	6	1	1	1	1	1	1	1	1	1	1	1	1	5	1	1	1	1	1	1	1	6	1	1	1	6	1	1	1	1	1	1	1	1	1	1	1	1	1	1	1	1	1	1	1	1	1	1	1	1	1	1	1	1	1	1	1	1	1	1	1	1	1	1	1	1	1	6	1	1	1	1	1	1	1	1	1	1	1	1	1	1	1	1	1	1	1	1	1	1	1	1	1	1	6	1	1	1	1	1	1	1	1	1	1	1	1	1	1	1	1	1	1	1	1	1	1	1	1	1	1	6	1	1	1	1	1	1	1	1	1	1	1	1	1	1	1	6	1	1	1	1	1	1	1	1	1	1	1	6	1	6	1	1	1	1	1	1	1	1	1	1	1	1	1	1	1	1	1	1	6	1	1	1	1	1	1	1	1	1	1	1	1	1	1	1	1	1	1	1	1	1	1	1	1	1	1	1	1	1	1	1	1	1	1	1	1	1	1	1	1	1	1	1	1	1	1	1	1	6	1	1	1	1	1	1	1	1	1	1	1	1	1	1	1	1	1	1	1	1	1	1	1	1	1	1	1	1	1	1	1	1	1	1	1	1	1	1	1	1	1	1	1	1	1	1	1	1	1	1	1	1	1	1	1	1	1	1	1	1	1	1	1	1	1	1	6	1	1	1	1	1	1	1	1	1	1	1	1	1	1	6	1	1	1	1	1	1	1	1	1	1	1	1	1	1	1	1	1	1	1	1	1	1	1	1	1	1	6	1	1	1	1	1	3	1	1	4	1	1	1	1	1	1	1	1	1	1	1	1	1	1	1	1	1	1	1	1	1	1	6	1	1	1	1	1	1	1	1	1	1	1	1	1	1	1	1	1	1	1	1	1	1	1	1	1	1	1	1	1	1	1	1	1	1	1	1	1	1	1	1	1	1	1	1	1	1	1	1	1	1	1	3	1	2	1	1	1	1	1	1	3	1	1	1	1	1	1	1	1	1	1	1	1	1	1	1	1	1	1	1	1	1	1	1	1	1	1	1	6	1	1	1	1	1	1	1	1	1	1	1	1	1	1	1	1	1	1	1	1	1	1	1	1	1	1	1	1	1	1	1	1	1	3	1	1	1	1	1	1	1	1	1	1	1	1	1	1	1	6	6	1	1	1	1	1	1	6	6	6	6	6	6	6	2	6	1	2	5	1	1	1	6	6	6	3	6	6	6	6	6	6	6	6	6	6	6	1	5	6	1	6	6	6	5	6	6	6	6	6	6	6	6	6	6	6	6	6	6	6	6	6	6	6	6	6	6	6	6	6	6	6	6	6	6	6	6	6	6	6	6	3	3	3	3	3	3	3	3	3	3	6	3	3	3	3	6	3	6	6	6	6	6	4	6	6	6	6	6	6	6	5	5	6	6	6	13	6	6	6	5	1	6	6	6	6	3	5	6	6	6	6	6	4	6	6	6	4	5	6	6	6	5	3	6	5	6	6	6	6	6	6	6	6	6	6	6	6	6	6	6	6	6	6	160+	6	6	2	1	6	6	6	3	3	6	6	6	6	6	6	6	5	5	5	5	13	6	6	6	6	6	6	6	6	6	5	5	5	4	6	6	5	6	5	2	5	6	6	6	2	6	6	6	6	6	6	6	6	6	3	6	6	6	6	6	6	6	6	6	6	6	4	5	5	6	6	5	5	6	6	6	6	6+	0	0
GCA_000307975.2_ASM30797v2_genomic.fna	4	6	6	6	6	1	2	1	6	6	2	6	3	3	6	6	6	6	6	6	1	5	6+	6	3	6	6	5	5	6	2	5	6	6	5	5	6	6	6	6	5	6	6	6	6	6	6	6	3	6	6	6	5	6	6	6	6	6	1	6	6	5	5	6	6	6	6	6	6	6	6	6	6	6	6	6	6	6	6	6	6	6	6	6	6	6	6	6	6	6	6	6	5	6	5	6	6	6	6	5	6	5	6	5	5	6	6	6	5	6	6	6	3	5	1	2	2	5	2	6	4	6	6	6	5	6	6	6	6	6	5	6	6	N	6	6	4	6	6	6	6	5	5	5	6	6	5	6	5	6	6	6	6	6	5	6	1	1	1	1	6	1	1	1	1	6	6	5	5	5	6	4	1	1	1	6	1	1	1	1	1	1	1	1	1	1	1	1	1	1	1	1	1	1	1	6	4	1	1	1	1	1	1	1	1	1	1	1	1	1	1	1	1	1	1	1	1	1	1	1	1	1	1	1	1	1	1	1	6	1	1	1	1	1	1	1	1	1	1	1	1	1	1	1	1	1	1	1	1	1	1	1	1	1	1	1	1	1	1	1	1	1	1	1	1	1	1	1	1	1	1	1	1	1	1	6	1	6	1	1	1	1	1	1	1	1	1	1	1	1	1	1	1	1	1	1	1	1	1	1	1	1	1	1	1	1	1	1	1	1	1	1	1	1	1	1	1	1	1	1	1	1	1	1	1	1	6	1	1	1	1	1	1	1	1	1	1	1	1	1	1	1	1	1	1	1	1	1	1	1	1	1	1	1	1	1	1	1	1	1	1	1	1	1	1	1	1	1	1	1	1	1	1	1	1	1	1	1	1	1	1	1	1	1	1	1	1	1	1	1	1	1	1	1	1	6	1	1	1	1	1	1	1	1	1	1	1	1	1	1	1	1	1	1	1	1	1	6	6	1	1	1	1	1	1	1	1	1	1	1	1	1	1	1	1	1	1	1	1	1	1	1	1	1	1	1	1	1	1	1	1	1	1	1	1	1	1	1	1	1	1	1	1	1	1	1	1	1	1	1	1	1	1	1	1	1	1	1	1	1	1	1	1	6	1	1	1	1	1	1	1	1	1	6	1	1	1	1	1	1	1	1	1	1	1	1	1	1	1	1	1	1	1	1	1	1	1	1	1	1	1	1	1	1	5	1	1	1	6	1	1	1	1	1	1	1	1	1	1	3	1	1	1	1	1	1	1	1	1	1	1	1	1	1	1	1	6	1	1	1	1	1	1	1	1	1	1	1	1	1	1	1	1	1	1	1	1	1	1	6	1	1	1	1	1	1	1	1	6	1	1	1	6	1	1	1	1	1	1	1	1	1	1	1	1	1	1	1	1	1	1	1	1	1	1	1	1	1	1	1	1	1	1	1	1	1	1	1	1	1	1	1	1	1	1	1	1	1	1	1	1	1	1	1	1	1	6	1	1	4	4	4	4	6	4	6	6	6	4	4	4	4	4	6	6	1	1	1	1	1	1	1	1	1	1	1	1	1	1	1	1	1	1	1	1	1	1	1	1	1	1	1	1	1	1	1	6	1	6	1	1	1	1	1	1	1	1	1	1	1	1	1	1	1	1	1	1	1	1	1	1	1	1	1	1	1	1	1	1	1	1	6	1	1	1	1	1	1	1	1	1	1	1	1	1	1	1	1	1	6	1	1	1	1	1	1	1	1	1	1	1	1	1	1	1	1	1	1	1	1	1	1	1	1	1	1	1	1	1	1	1	1	1	1	1	1	1	1	1	1	1	1	6	1	1	1	1	1	1	1	1	1	1	1	1	1	1	1	1	1	1	1	1	1	6	1	1	1	1	1	1	1	1	1	1	1	1	1	1	1	1	1	1	1	1	1	1	1	1	1	1	1	1	1	1	1	1	1	1	1	1	1	1	1	1	1	1	1	1	1	1	1	1	1	1	1	1	1	1	1	1	6	1	1	1	1	1	1	1	1	1	1	6	1	1	1	1	1	1	1	1	1	1	1	1	1	1	1	1	1	1	1	1	1	1	1	1	1	1	1	1	1	1	1	1	1	1	1	1	1	1	6	1	1	1	1	1	1	1	1	1	1	1	1	1	1	1	1	1	1	1	1	1	1	1	1	1	1	1	1	1	1	1	1	1	1	1	1	1	1	1	6	1	1	1	1	1	1	1	1	1	1	1	6	1	1	1	1	1	1	1	1	1	1	1	1	1	1	1	1	1	1	1	1	1	1	1	1	1	1	1	1	1	1	1	1	1	1	1	1	1	1	1	1	1	6	1	1	1	1	1	6	1	1	1	1	1	1	1	1	1	1	1	1	1	1	1	1	1	1	1	1	1	1	1	1	6	1	1	1	1	1	1	1	1	1	1	1	1	1	1	1	1	1	1	1	1	1	1	1	1	1	1	1	1	5	1	1	1	1	1	1	1	1	1	1	1	1	1	1	1	1	6	1	1	1	1	1	1	1	1	1	1	1	1	1	6	1	1	6	1	1	1	1	1	1	1	1	1	1	1	1	6	1	1	1	1	1	1	1	1	1	1	1	1	1	1	1	1	1	1	1	1	1	1	1	1	1	1	1	1	1	1	1	1	1	1	1	1	1	1	1	1	1	1	6	438+	6	1	1	1	1	1	1	1	1	1	1	1	1	1	1	1	1	1	1	1	1	1	1	1	1	1	1	1	1	1	1	1	1	1	1	1	1	1	1	1	1	1	1	1	1	1	1	1	1	1	1	1	1	1	6	1	1	1	1	1	1	1	6	1	1	1	1	1	1	1	1	1	1	1	1	1	1	1	1	1	1	1	1	1	1	1	1	1	1	1	1	1	1	1	1	1	1	6	1	1	1	1	1	1	1	1	1	1	1	1	1	1	1	1	1	1	1	1	1	1	1	1	1	1	1	1	1	1	1	1	6	1	1	1	1	1	1	1	1	1	1	1	1	1	1	1	1	1	1	1	1	1	1	1	1	1	1	1	1	1	1	1	1	1	1	1	1	1	1	1	1	1	1	1	1	6	1	1	1	1	6	1	1	1	1	1	1	1	1	1	1	1	1	1	1	6	1	1	1	1	1	1	1	1	6	1	1	1	1	1	1	1	1	1	1	1	1	1	1	1	1	1	1	1	1	1	1	1	1	1	1	1	1	1	1	1	1	6	1	1	1	1	1	6	1	1	1	1	1	1	1	1	1	1	1	1	1	1	1	1	1	1	1	1	1	1	1	1	1	1	1	1	1	1	1	6	1	1	1	1	1	1	1	1	1	1	1	1	1	1	6	1	1	1	1	1	1	1	1	1	1	1	1	1	1	1	1	1	1	1	1	1	1	1	1	1	1	1	1	1	1	1	1	1	1	1+	1	1	1	1	1	1	1	1	6	1	1	1	1	1	1	1	1	1	1	1	1	1	1	1	1	1	1	1	1	1	1	1	1	1	1	1	1	1	1	1	1	1	1	1	1	1	1	1	1	1	1	1	6	1	1	1	6	1	6	1	1	1	1	1	1	1	1	1	1	1	5	1	1	1	1	1	1	1	1	1	1	1	1	1	6	5	5	5	6	5	5	5	5	5	6	5	4	5	5	1	6	6	1	1	6	6	5	5	5	1	1	1	1	1	1	1	1	1	1	1	1	1	1	1	1	1	1	1	1	1	1	1	1	1	1	1	1	1	1	1	1	1	1	1	1	1	1	1	1	1	1+	1	1	1	6	1	1	1	1	1	1	1	1	1	1	1	1	5	1	1	1	1	1	1	1	6	1	1	1	6	1	1	1	1	1	1	1	1	1	1	1	1	1	1	1	1	1	1	1	1	1	1	1	1	1	1	1	1	1	1	1	1	1	1	1	1	1	1	1	1	1	6	1	1	1	1	1	1	1	1	1	1	1	1	1	1	1	1	1	1	1	1	1	1	1	1	1	1	6	1	1	1	1	1	1	1	1	1	1	1	1	1	1	1	1	1	1	1	1	1	1	1	1	1	1	6	1	1	1	1	1	1	1	1	1	1	1	1	1	1	1	6	1	1	1	1	1	1	1	1	1	1	1	6	1	6	1	1	1	1	1	1	1	1	1	1	1	1	1	1	1	1	1	1	6	1	1	1	1	1	1	1	1	1	1	1	1	1	1	1	1	1	1	1	1	1	1	1	1	1	1	1	1	1	1	1	1	1	1	1	1	1	1	1	1	1	1	1	1	1	1	1	1	6	1	1	1	1	1	1	1	1	1	1	1	1	1	1	1	1	1	1	1	1	1	1	1	1	1	1	1	1	1	1	1	1	1	1	1	1	1	1	1	1	1	1	1	1	1	1	1	1	1	1	1	1	1	1	1	1	1	1	1	1	1	1	1	1	1	1	6	1	1	1	1	1	1	1	1	1	1	1	1	1	1	6	1	1	1	1	1	1	1	1	1	1	1	1	1	1	1	1	1	1	1	1	1	1	1	1	1	1	6	1	1	1	1	1	3	1	1	4	1	1	1	1	1	1	1	1	1	1	1	1	1	1	1	1	1	1	1	1	1	1	6	1	1	1	1	1	1	1	1	1	1	1	1	1	1	1	1	1	1	1	1	1	1	1	1	1	1	1	1	1	1	1	1	1	1	1	1	1	1	1	1	1	1	1	1	1	1	1	1	1	1	1	3	1	2	1	1	1	1	1	1	3	1	1	1	1	1	1	1	1	1	1	1	1	1	1	1	1	1	1	1	1	1	1	1	1	1	1	1	6	1	1	1	1	1	1	1	1	1	1	1	1	1	1	1	1	1	1	1	1	1	1	1	1	1	1	1	1	1	1	1	1	1	3	1	1	1	1	1	1	1	1	1	1	1	1	1	1	1	6	6	1	1	1	1	1	1	6	6	6	6	6	6	6	2	6	1	2	5	1	1	1	6	6	6	3	6	6	6	6	6	6	6	6	6	6	6	1	5	6	1	6	6	6	5	6	6	6	6	6	6	6	6	6	6	6	6	6	6	6	6	6	6	6	6	6	6	6	6	6	6	6	6	6	6	6	6	6	6	6	6	3	3	3	3	3	3	3	3	3	3	6	3	3	3	3	6	3	6	6	6	6	6	4	6	6	6	6	6	6	6	5	5	6	6	6	6	6	6	6	5	1	6	6	6	6	3	5	6	6	6	6	6	4	6	6	6	4	5	6	6	6	5	3	6	5	6	6	6	6	6	6	6	6	6	6	6	6	6	6	6	6	6	6	160+	6	6	2	1	6	6	6	3	3	6	6	6	6	6	6	6	5	5	5	5	6	6	6	6	6	6	6	6	6	6	5	5	5	4	6	6	5	6	5	2	5	6	6	6	2	6	6	6	6	6	6	6	6	6	3	6	6	6	6	6	6	6	6	6	6	6	4	5	5	6	6	5	5	6	6	6	6	6+	0	0
GCA_000353935.1_ABNIH5_1_genomic.fna	2	18	11	11	11	1	1	1	12	12	1	11	2	10	12	11	12	12	11	12	10	8	12+	12	6	N	19	10	16	17	2	13	16	14	6	8	19	17	19	16	14	17	20	20	19	19	22	9	5	5	12	12	11	5	11	12	12	N	8	25	21	72	10	10	21	27	24	27	26	20	22	22	23	16	17	16	16	19	13	13	18	18	8	14	19	13	14	14	15	14	18	16	13	8	13	12	15	18	5-	13	15	14	12	11	13	17	16	16	17	15	N	13	3	5	1	1	1	1	1	1	1	1	1	1	1	1	1	1	1	1	1	1	1	10	15	1	1	1	1	1	1	1	1	1	1	1	2	1	1	1	1	N	1	1	1	1	1	1	1	1	13	1	1	1	1	6	N	5	5	5	6	4	1	1	1	32	1	1	1	1	1	1	1	1	1	1	1	1	1	1	1	1	1	1	1	6	1	1	1	1	1	1	1	1	1	1	1	1	1	1	1	1	1	1	1	1	1	20	1	1	1	1	1	1-	1	1	1	1	6	1	1	1	1	1	1	1	1	1	1	1	1	1	1	1	1	1	1	1	1	1	1	1	1	1	1	1	1	1	1	1	1	1	1	1	1	1	1	1	1	1	1	1	1	1	1	6	41	1	1	1	1	1	1	1	1	1	1	1	1	1	1	1	1	1	1	1	1	15	1	1	1	1	1	1	1	1	1	1	1	1	1	1	1	1	1	1	1	1	1	1	1	1	1	1	1	1	1	1	N	1	13	N	1	1	1	1	N	1	1	1	1	1	1	1	1	1	1	1	1	1	1	1	1	1	1	1	1	1	1	1-	1	1	1	10	1	1	1	1	1	1	1	1	1	1	1	1	1	1	1	1	41	1	1	1	1	1	1	1	1	1	1	1	1	1	1	6	1	1	1	1	1	1	N	17	1	1	1	1	1	1	1	1	1	1	1	1	1	6	13	1	1	1	1	1	1	1	1	1	1	1	1	1	1	1	1	1	1	1	1	1	1	1	1	1	1	1	1	1	1	1	1	1	1	1	1	1	1	1	1	1	1	1	1	1	1	1	1	1	1	1	1	1	1	1	1	1	1	1	0?	1	1	1	1	N	1	1	1	1	1	1	1	15	N	1	N	1	N	1	1	1	1	1	1	1	1	1	1	1	15	1	1	1	1	1	1	N	1	1	1	1	1	1	1	1	1	1	1	1	1	1	1	1	1	1	1	1	1	1	1	3	1	1	1	1	1	1	1	1	1	1	1	N	1	1	1	1	1	1	1	1	1	1	1	1	1	1	1	1	1	1	1	1	1	1	1	1	1	1	1	6	1	1	1	1	1	1	1	1	N	1	1	1	6	1	1	1	1	1	1	1	16	1	1	1	1	1	1	1	1	N	1	49	1	1	1	1	1	1	1	1	1	1	1	1	1	1	1	1	1	N	1	N	1	1	1	1	1	1	1	1	1	1	1	N	1	1	6	1	1	1	16	25	15	16	1	16	20	17	15	17	15	15	16	16	18	15	14	1	15	16	2	10	1	1	1	1	1	30	N	1	1	1	N	1	1	1	1	1	1	1	1	1	1	N	1	1	6	N	6	1	1	1	1	1	1	1	1	1	56	1	1	1	1	N	1	1	1	1	1	1	1	1	1	1	N	1	1	1	1	1	1	1	1	1	1	1	1	1	1	N	N	1	1	1	1	1	1	1	1	6	1	1	1	1	32	1	1	1	1	1	1	1	1	1	1	1	1	1	1	1	1	1	1	16	1	1	1	1	1	1	1	1	1	1	1	1	1	1	1	1	1	1	6	1	46	1	1	1	1	N	1	1	1	1	1	1	1	1	1	1	1	1	1	1	6-	1	1	1	13+	1	1	1	1	1	N	1	1	1	1	1	1	1	1	1	1	1	1	1	1	1	1	1	1	1	1	1	1	1	1	1	1	1	N	1	1	1	1	1	1	1	1	1	1	1	1	1	1	1	1	1	1	6	1	N	1	1	1	1	1	1	1	1	6	1	1	1	1	1	1	1	1	1	1	1	1	1	1	1	1	1	1	1	1	1	1	1	1	95-	1	1	N	1	1	1	N	1	1	1	1	1	1	1	1	1	1	1	1	1	1	1	1	1	1	1	1	1	1	N	1	1	1	1	1	1	1	1	1	1	1	1	1	1	1	1	1	1	1	1	1	1	1	6	1	1	1	N	1	1	1	1	1	1	1	N	1	1	1	1	1	1	1	1	34	1-	1	1	1	N	1	1	1	1	1	1	1	1	1	1	1	1	13	1	1	1	1	1	1	1	1	1	1	1	1	1	1	35	1	1	1	1	1	1	1	1	1	1	1	1	1	1	1	1	1	1	1	1	1	1	1	1	1	1	1	1	1	1	6	1	1	N	1	1	1	1	1	1	N	1	1	1	1	1	N	1	1	1	1	1	1	1	1	1	1	10	1	24	1	1	1	1	1	1	1	1	1	1	1	1	1	1	1	1	8	1	1	N	1	1	1	1	1	1	1	1	1	1	6	1	1	1	1	1	1	1	1	1	1	1	1	1	1	1	N	1	1	1	1	1	1	1	1	1	1	1	1	1	1	1	1	1	1-	1	1	1	1	1	1	1	1	1	1	1	1	1	1	1	1	1	1	1	1	1	1	1	1	1	438+	6	1	1	1	1	1	1	1	1	1	1	N	1	1	1	1	1	1	1	1	1	1	1	1	1	1	1	16	1	1	1	1	14	73	1	N	1	1	1	1	1	1	1	1	1	1	1	N	N	1	1	N	1	1	6	1	1	1	1	N	1	1	1	N	1	1	N	1	1	1	1	1	1	1	N	1	1	N	1	1	1	1	1	1	N	1	1	1	1	1	31	16	40	1	1	1	N	6	1	N	1	1	1	1	16	1	1	N	1	1	1	1	1	1	1	N	1	1	1	1	1	1	1	1	1	1	1	1	4	1	1	1	1	N	1	1	1	1	1	1	1	1	1	1	1	1	1	1	1	1	1	1	1	1	1	1	1	1	1	1	1	1	1	1	1	1	1	1	1	1	1	1	1	1	1	6	1	1	16	1	1	1	N	1	1	1	1	1	1	1	1	1	1	14	1	6	1	1	1	1	1	1	1	1	6	1	1	1	1	1	1	1	1	1	N	1	1	1	1	1	1	1	1	1	1	1	1	N	1	1	1	1	1	1	1	1	1	6	1	1	1	1	1	6	1	1-	1	1	N	1	1	N	1	1	1	1	1	N	1	1	1	N	1	1	1	N	1	1	1	15	1	1	N	1	1	N	1	1	1	1	1	1	1	1	1	1	1	1	N	1	6	1	1	1	1	1	1	1	1	1	1	1	1	1	1	1	1	1	1	N	1	1	1	1	1	1	1	1	1	53	N	1	44	1	1	1+	1	1	1	1	1	1	1	1	6	1	1	1	1	1	1	1	1	1	1	1	1	1	N	1	1	154-	1	1	1	1	1	1	1	1	1	1	1	1	1	1	1	1	1	1	1	1	1	1	1	1	1	1	1	1	1	1	6	1	1	1	1	1	1	1	1	15	1	1	1	1	1	1	1	1	1	1	1	1	1	1	1	1	N	1	6	5	5	5	6	5	5	5	5	5	6	5	4	5	5	N	6	6	1	1	6	6	5	5	5	1	1	1	1	N	1	1	1	1	1	1	1	1	1	1	1	1	1	1	1	1	15	19	1	1	1	1	1	1	1	14	1	1	1	1	1	1	1	1	1	1	1+	33	1	1	6	1	1	1	1	1	1	1	1	1	1	1	1	1	1	1	1	1	1	1	1	1	1	1	1	1	N	N	1	1-	1	1	15	1	1	1	1	1	1	1	1	1	1	1	1	1	1	1	1	1	1	1	1	1	1	1	N	1	1	1	1	1	1	1	1	1	1	6	1	1	1	1	1	1	1	N	1	1	1	1	1	1	1	1	1	1	1	1	1	1	N	1	1	1	6	1	17	1	1	1	1	1	1	1	1	1	1	1	1	1	1	1	1	1	1	1	1	1	1	1	1	N	1	1	1	1	1	1	1	1	1	N	1	1	1	1	16	6	1	1	1	1	1	1-	1	1	1	1	1	1	N	1	1	1	1	1	N	1	1	1	1	1	1	1	1	1	1	1	1	1	6	1	1	1	1	1	1	1	1	1	1	1	1	1	1	1	1	3	1	11	1	1	1	1	1	1	1	1	N	1	1	1	1	1	1	1	1	1	1	1	1	1	59	1	1	1	1	1	N	6	1	1	1	1	1	1	1	1	1	1	1	1	N	1	1	1	14	17	15	14	15	4	17	1	1	1	1	1	1	1	1	1	1	1	1	1	1	1	1	1	1	1	1	1	1	1	1	1	1	1	1	1	1	1	1	1	1	1	1	1	1	1	1	1	16	1	1	1	1	1	1	1	N	19	1	1	1	1	1	1	1	6	1	1	1	1	1	1	1	1	1	1	1	1	1	1	1	1	1	1	1	14	14	14	15	13	15	14	17	15+	13	12	14	15	0?	15	16-	12	13	18	17	14	15	14	14	1	15	1	1	1	1	1	1	1	1	1	1	1	1	1	1-	1	1	1	1	1	1	1	1	1	1	1	1	1	1	1	1	1	1	1	1	1	1	1	1	1	1	1	1	1	1	1	1	1	N	1	1	1	1	1	1	1	1	1	1	1	1	1	1	1	1	1	3	1	1	1	1	1	1	1	1	3	1	1	1	1	1	1	1	1	1	1	1	1	1	1	1	1	1	1	1	1	1	1	1	1	1	1	1	1	1	1	1	1	1	1	1	1	1	1	1	1	1	14	14	5	14	16	14	13	15	15	11	27	14	16	14	18	14	16	N	13	2	3	10	14	10	10	16	15	15	15	15	15	12	13	14	6	N	14	15	18	1	13	4	1	8	12	10	10	12	11	9	4	1	14	7	1	9	14	11	14	20	6	6	3	6	6	6	6	6	6	6	6	6	6	14	1	5	6	1	6	6	6	5	6	6	6	6	6	6	6	6	6	6	6	6	6	6	6	6	6	6	6	6	6	6	N	6	6	6	6	16	6	17	6	6	6	6	6-	16	3	3	3	3	3	3	3	3	3	3	6	16	3	15	3	3	16	6	6	12	N	6	4	6	6	6	6	6	6	6	5	5	6	N	6	13	6	6	6	5	1	6	6	6	6	3	5	6	6	6	6	15	9	N	12	11	11-	10	12	13	17	10	1	12	10	11	13	N	N	1	11	12	2	12-	12	12	12	5	12	13	12	12	12	N	11	11	7	1	12	12	11	1	3	11	12	12	11	12	12	12	N	11	10	16	12	12	12	20	11	10	12	12	11	12	11	10	7	8	10	12	11	12	10	2	11	7	12	9	1	13	12	12	12	12	11	11	11	N	5	12	12	11	12	12	11	11	11	11	10	16	3	10	10	12	12	12	6	12	12	12	12	11	0	0
GCA_000353955.1_ABNIH6_1_genomic.fna	3	4	4	4	4	2	1	1	4	4	1	4	4	4	4	4	4	4	4	4	4	3	4	4	1	4	4	2	3	41	2	3	4	4	6	6	7	7	7	7	6	7	7	53	7	7	7	7	2	7	7	7	6	7	7	7	7	N	1	7	7	6	6	7	129-	7	7	7	7	4	4	4	4	49	4	4	7	4	4	4	4	4	4	4	4	4	4	4	4	4	N	4	1	4	1	4	4	4	4	4	4	4	4	4	43	4	4	4	3	4	4	4	3	3	1	1	1	3	3	4	3	4	4	4	4	4	7	4	4	4	3	4	57	11	4	4	4	4	4	7	4	4	4	4	4	4	3	4	3	4	N	77	4	4	4	4	1	3	4	24	4	4	4	3	4	4	1	1	1	1	4	1	4	6	6	4	2	4	4	N	4	6	2	4	4	4	4	4	4	3	4	4	4	4	4-	4	3	2	3	4	5	4	4	4	1	1	2	2	1	1	6	6	4	6	2	6	N	4	6	4	4	4	N	4	4	3	4	4	4	4	4	N	4	4	4	6	6	N	5	6	6	6	6	6	6	6	4	4	4	4	4	4	4	3	4	4	6	4	4	6	4	4	4	4	6	4	4	4	1	4	4	N	4	4	4	7	4	4	3	1	6	4	3	4	4	4	4	6	1	4	4	4	4	4	4	4	4	6	1	4	4	4	4	4	4	4	4	6	4	4	4	4	1	4	4	1	4	1	4	1	4	4	4	4	6	4	4	4	4	4	4	4	1	4	4	2	4	4	4	6	4	4	3	2	4	1	1	4	4	4	4	2	4	4	4	4	4	4	4	4	1	1	N	4	4	1	4	4	4	4	4	4	4	4	4	4	4	4	4	3	4	4	4	4	4	4	4	4	2	3	4	3	4	4	4	4	4	2	3	4	4	4	4	4	4	4	4	4	4	4	4	4	4	4	4	4	46	4	4	4	4	N	4	4	6	4	1	4	3	4	4	4	4	4	4	4	4	4	4	4	4	3	2	4	4	4	1	4	N	4	1	2	4	4	N	2	4	1	4	4	4	4	4	4	4	4	6	6	3	6	6	4	3	1	4	4	4	4	N	6	5	6	6	10	6	2	6	N	6	6	4	6	6	7	6	6	6	6	4	6	4	4	4	4	4	4	4	4	4	1	4	1	4	4-	46-	4	2	1	54	4	2	4	4	18	3	2	4	4	4	4	4	4	4	4	4	3	41	4	4	3	4	4	4	4	4	4	4	4	4	4	4	4	4	4	4	58	4	55	3	4	4	4	4	4	4	4	4	3	3	4	4	1	1	4	30	1	3	4	4	4	4	4	3	1	2	4	4	3	4	4	4	4	4	4	4	4	1	4	4	6	4	4	4	4	4	4	1	4	6	1	1	4	4	4	4	4	5	6	3	1	2	1	4	4	4	4	4	3	49	6	2	4	6	4	1	1	4-	4	4	4	4	4	4	5	4	6	4	4	495-	4	4	4	4	6	4	6	6	6	4	4	4	4	4	65	4	4	4	3	4	4	4	4	4	6	3	4	4	4	4-	4	4	4	N	4	2	6	4	3	4	6	4	6	4	4	6	4	4	N	4	4	4	4	4	4	46	4	6	4	4	4	1	4	1	5	4	6	4	4	4	4	4	4	4	4	4	3	4	1	4	4	4	7	4	4	6	6	6	6	6	6	6-	6	4	4	4	4	4	4	4	4	3	4	4	4	4	4	4	3	4	6	4	4	4	4	N	4	4	4	4	4	4-	6	4	4	63	4	4	4	1	4	4-	32	N	4	N	4	4	2	4	4	4	1	4	3	3	50	4	4	4	4	4	4	3	4	4	1	N	4	42	5	4	4	4	4	N	4	4	3	3	3	3	4	2	2	4	4	4	4	5	2	4	4	4	4	4	4	4	4	4	4	4	4	N	4	2	3	6	4	N	4	N	3	3	4	4	4	N	4	4	4	4-	4	4	4	4	4	4	4	4	6	6	4	4	4	N	6	4	4	4	4	4	4	4	3	4	4	4	4	4	4	4	4	4	4	4	4	4	4	4	5	3	3	N	4	4	4	42	4	1	4	4	3	4	79	4	3	4	6	N	N	4	4	4	4	3	3	4	4	4	4	4	4	4	4	4	4	6	6	4	4	6	4	1	4	4	4	4	4	4	4	4	N	4	4	4	4	4	4	4	4	4	4	6-	4	4	6	4	1	4	4	4	6	4	4	4	4	4	N	3	4	4	4	4	4	3	4	4	4	4	4	N	4	4	4	4	4	6	4	3	4	4	N	4	4	4	4	4	4	4	1	41	6	6-	5	6	7	1	6	6	6	4	7	2	6	6	5	6	5	4	6	6	6	6	6	5	6	6	3	6	6	6	5	4	47	6	6	7	6	6	54	4	6	6	3	6	6	N	6	6	6	6	6	6	6	6	5	6	6	1	N	6	N	39	4	N	4	3	6	5	3	6	6	2	5	5	3	6	5	6	6	6	22	7	23	6	N	6	6	6	5	4	6	6+	5	6	44	4	6	4	7	4	4	4	4	4	4	2+	6	2	4	4	4	7	1	4	37	6	2	5	4	5	6	43	6	6	6	6	5	6	6	6	6	6	6	6	6	6	6	6	6	6	40	6	6	6	6	5	5	6	5	6	6	4	2	3	4	4	4	4	4	N	4	397-	4	4	4	4	4	4	4	4	6	3	6-	4	4	4	4	1	4-	4	4	4	4	4	1	4	4	4	4	6	3	4	4	4	4	6	4	4	4	53	4	4	N	4	4	4	4	4	4	6	4	4	N	4	4	4	4	4	4	5	4	4	4	4	4	N	4	4	2	6	4	4	4	4	4	4	4	4	4	4	4	4	4	N	4	4	4	4	1	4	3	4	4	4	41	N	4	4	4	4	4	4	4	4	2	4	4	2	2	6	1	4	3	2	1	3	4	4	2	4	6	N	4	4	1	4	4	6	N	3	4	4	4	4	4	4	6	4	4	4	4	4	4	4	5	44	4	3	5	5	4	4	3	3	4	4	4	4	1	4	4	4	4	1	4	4	2	4	4	6	2	4	4	4	4	4	4	6	4	1	4	4	4	4	1	4	4	4	4	173-	4	N	6	4	4	4	4	4	4	4	4	4	4	4	4	4	3	6	6	4	4	25	4	3	2	3	4	4+	4	4	4	1	4	N	4	4	4	4	4	4	4	6	4	53	4	4	4	4	4	N	4	4	4	4	4	5	3	4	4	2	3	3	4-	4	4	1	N	4	N	4-	3	4	4	6	4	4	4	4	4	4	4	4	6	4	3	4	4	4	4	4	4	4	N	6	4	4	4	N	4	4	4	2	1	1	1	4	4	6	4	4	4	4	68	4	6	4	1	4	4	4	4	4	4	2	4	6	4	4	4	4	4	4	N	4	4	N	4	3	N	3-	4	4	4	4	4	4	1	2	6	6	4	40	34	4	4	4	4	1	4	1	1	4	4	1	4	4	2	4	4	6	4	4	2	4	4	4	4	1	4	4	4	4	4	2	4	4	4	4	4	4	4	4	4	4	4	280-	4	4	4	4	N	4	3	4	4	4	4	4	4	N	1	4	4	4	4	4	4	1	1	1	1	1	54	1	1	1-	4	1	1	1	1	4	7	4	6	N	4	4	1	1	1	4	4	4	4	4	4	4	4	4	4	4	6	4	4	4	4	4	4	4	6	6	5	6	3	4	4	1	6	3	2	4	4	4	6	4	4	2	55	4	4	4	4	5	6	6	7	6	6	6	79	6	4	4	4	4	4	85	1	1	4	4	4	4	4	4	4	4	4	4	4	4	4	4	4	4	4	4	6	4	4	4	4	4	N	4	4	4	6	4	4	4	4	4	4	4	4	1	4	4	4	4	4	4	4	2	4	4	4	4	3	4	4	4	4	4	4	4	4	4	4	N	6	4	4	4	4	4	4	4	4	4	3	4	4	71	4	4	3	2	4	4	6	4	1	4	4	3	4	3	4	3	4	2	2	4	4	4	4	4	4	4	4	3	4	4	4	4	4	4	5	4	4	4	1	4	4	N	4	4	4	4	4	4	6	4	80	2	1	6	1	4	6	4	N	7	4	N	4	1	4	N	4	0?	4	4	4	4	4	4	4	4	1	3	4	48	4	4	4	4	4	4	4	4	4	4	4	43	4	4	4	4	4	1	2	4	4	4	4	1	4	5	4	4	4	4	4	4	4	4	N	3	1	1	3	4	6	4	6	6	4	4	4	4	4	7	4	4	4	4	4	4	4	4	4	4	4	4	4	4	4	4	4	6	6	6	6	2	6	6	6	6	4	6	6	6	6	6	6	4	4	3	4	N	4	4	N	4	4	3	4	1	N	4	4	4	2	2	4	N	4	4	4	3	4	4	4	4	4	4	4	4	4	4	4	4	5	4	3	4	4	3	4	43	4	4	4	4	4	3	4	4	4	4	6	4	4	4	4	4	6	5	6	4	4	4	4	4	4	4	4	4	4	4	4	4	4	4	4	6	0?	6	N	5	6	N	4	4	4	4	4	1	69	4	4	4	4	4	5	2	4	1	4	4	3	4	N	4	4	4	4	4	4	4	4	4	6	4	1	1	4	3	4	4	N	3	4	4	4	4	4	4	4	6	4	4	4	4	3-	4	4	45	4	2	4	4	4	3	4	4	4	4	4	4	4	6	1	1	2	1	1	1	4	4	1	1	1	3	2	1	2	1	1	1	1	1	1	1	1	4	1	3	1	1	4	48	4	4	6	N	6	4	4	N	4	4	3	3	4	3	3	4	4	4	40	4	4	4	4-	4	4	4	4	4	4	4	4	4	3	4	4	6	4	6	4	4	4	4	3	4	4	6	4	4	4	4	4	4	4	4	4	4	4	4	4	4	4	4	2	4	3	1	4	7	4	4	4	4	4	4	1	4	1	1	4	4	4	4	4	4	61	2	4	4	4	54	7	7-	7	7	7	7	69	1	4	4	3	4	4	4	3	N	4	4	4	4	4	7	4	N	4	4	4	4	4	4	4	4	4	4	4	4	4	49	4	4	4	4	4	4	4	4	4	4	4	4	4	4	4	4	4	4	6	4	4	4	4	4	4	4	4	4	4	4	4	4	4	4	4	4	4	4	101	4	4	4	4	3	3	4	4	4	4	4	4	4	3	3	4	4	4	4	4	4	7	4	55	4	4	1	4	4	4	5	3	4	7	4	4	1	4	3	4	4	4	N	4	4	71	4	4	4	4	4	7	4	7	4	4	4	4	4	4	4	1	4	4	4	1	4	4	4	4	4	4	4	4	6-	4	4	4	4	4	4	4	4	4	4	4	4	4	4	4	4	3	4	4	3	4	4	2	4	4	4	4	1	7	4	4	4	4	4	4	4	N	1	4	4	4	4	4	4	4	4	N	4	4	3	4	N	4	4	6	3	4	4	4	4	4	0	0
GCA_000353995.1_ABNIH10_1_genomic.fna	3	4	4	4	4	2	1	1	4	4	1	4	4	4	4	4	251-	4	4	4	4	3	4	N	1	4-	4	2	3	41	2	3	4	4	6	6	7-	7	7-	7	6	7	7	53	7	7-	7	7	2	7	7	7	6	7	7	7	7	7	1	7	7	6	6	N	129-	7	7	7	7	4	4	4	4	49-	4	4	7	4	4	4	4	4	4	4	4	4	4	4	4	N	4	4	1	4	N	4	4	4	4	4	4	4	4	0?	43	4	4	4	3	4	4	4-	3	122-	1	1	1	3	3	4	N	4	4	4	4	4	289-	4	4	4	3	4	57	11	4	4	4	4	4	N	4	4	4	4	N	4	3	4	3	4	4	77	4	4	4	109	1	3-	4	24	4	4	4	3	4	4	1	1	1	1	4	1	4	6	6-	4	2	4	4	4	4	6	2	4	4	198	4	4	4	3	4	4	4	4	4	4	3	2	3	4-	5	4	N	4	1	1	2	2	1	1	N	6	4	6	2	6	46	4	N	4	4	4	N	4	4	3	4	4	4	4	4	4	4	4	4	6	6	33-	5	6-	6	6	6	6-	6	6	4	4	4	4	4	4	N	3	4	4	6	4	4	6	4	4	4	4	6-	4-	4-	4-	1	4	4	6	4	4	4	N	4-	4	3	1	6-	4	3	4	4	99-	4	6	1	4	4	4	4	4	4	4	4	6	1	4	4	4	4	4	4	4	4	6	4	4	N	4	1	4	4	1	4	1	4	1	4	4	4	4	6	4	4	4	4	4	4	4	1	4	4	2	4	4	4	6-	4	4	3	2	4	1	1	4	4	4	4	2	4	4-	4	14-	4	4	4	4	1	1	116	4	4	1	4	4	4-	0?	4	4	N	4	4	4	4	4	4	3	4-	4	4	4	4	4	4	4	2	3	4	3	4	4	4	4	4	2	3	4	4	4	4	4	4	4	4	4	N	4	4	4	4	4-	4-	4	46	N	4	4	4	4	4-	4	336-	4	1	4	3	4	4	4	4	N	4	4	4	4	N	4	4	217-	2	4	4-	0?	1	4	4	4	1	2	4	4	4-	2	4	1	4	4	4	4	4	4-	4	4	6	6	3	6	6	4	3	1	N	4	4-	4	4-	6	5	6	6	N	197	2	6	N	6	253-	4	6	6	7	6	6	6	6-	4	6	4	4	4	4-	4	4	4	4	4	1	4	1	4	4-	4	4-	2	1	54	4	2-	4	4	18	3	2	4	4	4	4	4	4	4	4	4	3	41-	4	4	3	0?	4-	4	N	4	4	4	4	4	4-	4	4	4	4	4	58-	4	55	3	4-	4	4	4-	4	4	N	4	3	3	4	4	1	1	4	30	1	20-	177-	0?	4	4	4	3	N	2	4	4	3	N	4-	4-	4	4	4-	4	4	1	4	4	N	4	4	4-	4	4	4	0?	4-	6	1	1	4	4	4	4	4	5-	6-	3	1	2	1	4	4	4	4	4	3	49-	6	2	4	6	4	1	1	4-	153-	4	4	4	4	4	5	4	N	4	4	4	4	205-	4	4-	6	4	6	6	N	4	4	4	4	4	65	4	4	4	3	4	4-	4	4	N	6	3	4	0?	4	4-	4	4	4	6	4	288-	6	4	3	4	N	4	0?	4	4	6	4	4	4	4	4	4	4-	4	4	283-	4	6	4	4	N	N	4	1	5	4	6	4	4-	4	4-	4	4	4	4	4	3	4	1	4	4	4	7	4	4	6	6	6	6	6	252-	N	6	4	4	4	4	4	4	4	4	3	4	4	4	4	4	4-	3	4	6	4	4	4-	4	4	4	4	4	4-	N	4-	6	4	4	63	4-	4	4	1	4	4	32-	4	4	3	4	265-	2	4	4	4	1	4	3-	3	50	159-	4-	4	4	4	95-	3	4	4	1	4	4	42	5-	4	4	4	4	65	4	4	3	3	3	3	4	2	N	4	4	4-	4	0?	2	4	4	4-	4-	4	4	4	4	4	4	4	4	4	4	2	3	6-	4	N	4-	N	3	3	0?	4	26-	N	4	4	4	6	4	4	4	4-	4	4	4	4	486-	6	4-	N	4	4	6	4	4	4	4	4	4	4	3	4-	4	4-	4	4-	4-	4	4-	4-	N	4-	0?	4-	4	4-	5	3	121-	4	4	183-	0?	42	4-	1	4	4	3	4	79	4-	N	4	6	4	4	4	4-	4	4	3	3-	4	4	0?	4	4	4-	4	4	4-	4	6	6	4	4	6	4-	1	4	4	4	4	4-	4	4-	4	4	4	N	4	44-	4	4	4-	4	4	4	6	4	4-	6	4	1	280-	4	4-	6	4	29-	4-	4	4	4-	3	4-	0?	122	4-	0?	3	4	4	4-	183-	39-	0?	4-	4	4	4	4	6-	4	3	4	4	4	4	4	4	4	4-	4	4-	1	41	6	6-	5	6	7-	1	6	6	6-	4	7	2	6-	6	5	185-	1-	4	N	6-	6-	6	6	5	N	6	3	6	6	6-	5	4	47	N	6	7	6	6	54-	4	6	6	3	6	6	6	6	6-	6	6	6	6-	6	230-	18-	6	12-	1	6	6	6	39	4	6	4	3	6-	5	3	6	6	2	5	5	3	6-	5	N	6	227-	22-	7	126-	6	6-	6-	6	6	5-	4	6	6+	5	224-	44	4	6	4	7	4	4-	4	4	4	4	2+	6	2	4	4	0?	7-	1	4	37	6-	2	5	4	5	17-	43	6	6	6	6	5	6	6	6	6	6	6-	6	6	N	6	6	257-	188-	40	29-	6	6-	6-	5-	N	6	5	6	6-	0?	2	3	4	4	4	4	4	4	4	0?	0?	4	254	4	4	4	4	4	6	N	6-	4	4	4	4	95	0?	4	4	4	4	4	1	0?	93-	4	N	6	3	4	4-	4	4	6	4-	4	4	53	4	4	4	4	4	4-	4	4	4	6-	4	4	N	4	4	4	4-	4	4	0?	4	N	4	4	4	4	N	4	2	0?	4-	4	4	4	4	4	4	4-	4	4-	4	4	4	3	4	4	4	4-	N	4-	3	4	4	4-	41-	3	4	4-	N	4-	4-	0?	4	N	2	4	4-	2	2	6	1	0?	3	2	1	3	4	4	2	4	6	4	N	4	1	4	4	6	4	3	235	4	0?	4	4	80-	6-	4-	4	4	4	4	4-	4	5	44	4	3	5	5-	4	4	3	3	4	4	4-	4-	1	4	4	4-	4	1	4	4	2	4	4	6	49-	4	4	4	4	4	4-	6	4	1	4	4	4	114-	1	4	4	4	4	0?	0?	4	6	4	125-	4	4-	4	N	0?	4-	4	4	4	4	4	3	6	6	4	4	25	4	3	2	3	4-	4+	4	4	4	1	4-	4	4	77-	140-	4	4	4	4	170-	4	192-	4	4	4-	4	4-	4	4-	4-	160-	4-	4	5	3	4	4	2	3	N	4-	N	N	1-	4	4-	4-	4	3-	4	4	N	4	4	4-	4	N	4	N	4	6	4	3	4	4	4	4	4	4	4	4	6	4-	4-	4	0?	4	4	4	2	1	1	1	0?	4	6	4-	4	4	N	68	4	6	4	1	4	4	4	4	4	123-	2	4	6	4	N	4	4-	4	4	4	4	4	74-	4	3	4	3	4	4	4	4	4	4	1	2	0?	6-	4	40	34-	4	0?	4	4-	1	4	1	1	4	4	1	0?	4	2	4	4	6	4	0?	11-	4-	4-	4	4	1	4	4	4	N	4	117	284-	4-	4	4	4-	4	4	N	4	4	N	283-	4	4	4	4	35	4	3	N	4-	4	4	4	4	2	1	4-	4-	4	4-	4	4	1	1	1	1	1	0?	1	1	1-	4	1	1	1	1-	4	7-	0?	6	N	4-	4	1	1	1	4	4	4-	4-	4	0?	4	4-	4	N	4	0?	4	4	4	4	4	4-	4-	6	6-	5	6	3	4	4	1	6	3	N	4	4	180-	6	4	4	2	55-	4	4	4	4	5-	6	N	7-	6	6	6	79	0?	4	4	4	4	4	85-	1	1	4	N	4	4	4	0?	4-	4	4	4	N	4	N	4	4	4	4	89	N	4	4	4	4	4	4	4	4-	4	6	4	4	4	4	4	N	4	4-	1	4	4	4	4	4	4	4	2	120-	4	4	4	3	4-	4	4	4	4	4	4-	N	4	N	4	6	4	4	4	4	4	4	4	4	4	3	4	4	0?	4	4	3	2	4	4	N	4	1	4-	4	3	N	3	4	3	4	2-	100-	4	4	4	4	4	4	4	4-	3	4	4	4	4	4	4	5	4	4	4	1	4	0?	N	4-	4	4	4	4	4	6	4	80-	2	1	6	1	4	6-	4	N	7-	4	7-	4	1	4-	4	4	0?	4	4	4	4	4	N	4	4	N	3	4	48	4	4	4	4	4	4	4	4	4	N	4	43	4	4	4-	4	4-	1	2	4	4	4	4	1	4	5	4	4	4-	4	4	91-	4-	4	3	3	1	1	3	4	6	4	6	6	4	4	4	4	4	7-	4	N	4	4	4	4	4	4	4	4	N	4	4	4	4	4-	4	N	6-	6	6	2	6	6	6-	6	4	6	6-	6	6	6	6-	4	4	3	4-	4	4-	4	49	4-	4	3	4	1	6-	4	0?	4	2	2	4	4	4	0?	4-	3-	4	4	4	4	4	4	4	4	4	4	4	4	N	4	N	4	4	3	4	43-	4	4	4	4	4	3	4	4	4	4	6	4	N	4	N	4	6	5	6	4	4	4	4	4	4	4	4	4	4	4-	4	4	4	4	4	6	0?	6	6	5	6	0?	4-	4	4	4	4	1	69-	4	4-	4	N	4	5	2	4	1	4	4	3	4	4	4	4	4	4	4	4	4	4	4	6	4	1	1	4	3	4	4	4	3	4	4	N	4	4	4-	4	6	4	4-	4	4	35-	4	N	N	4	2	4	4	4-	3	4	4-	4	4-	4	4	4	6	1	1	2	1	1	1	4	4	1	1	1	3	2	1	2	1	1	1	1	1	154-	1	1	4	1	3	1	1	4	48	4	4	6	4	6-	4	4	4-	4	N	3	3	4	3	3	4	4	4	40	4	4	4	4-	4	4	4	4-	4	4	4	0?	4	3	4	4	6	4	6	4	4	4-	4	3	4	N	6	4	N	4	4	4	4	4	4	4	4	4	4	4	4-	4	4	2	4-	3	1	4	7	4	4	4	4	4	4	1	4	1	1	4	4	4	4	4	N	61-	2	4	88-	N	54	7-	N	7	7	7	7	69	1	4	4	3	4	4	4	3	4	4	4	4	4	4-	7	4	4	4	4	0?	4	4	4	4	4	4	4	4	4	4	4	N	4-	N	4-	4-	4	N	4	4	4	4	4-	4-	4	4	4	4	4	6	4	4	4	4	4	4	4	4	4	4	4	4	4	N	0?	4	4	4	4	101-	4	4	4	4	3	3	4	4-	4	4	4	4	4	241-	3	4	4	4	4	4	4-	7	4	55	4	4	1	N	4	4	5	N	N	7	4	4	1	4	3	4	4	4	4	4	4	71	4	4	4	4	4	7	4	7	4	4	4	4	4	4	4	1	4	4	4	1	4	4	4	4-	4	4	4	4	6	4	N	4	4	4	4	4	4	0?	4	4	4	4	4	4	4	3	4	4	3	N	4	2	4	N	4	N	1	7	4	4	4	4	4-	4	4	N	1	4-	4	N	4-	4-	4	4	4	4	4	N	3	4	6	4	4	6	3	4	4	4	4	4	0	0
GCA_000464705.1_ASM46470v1_genomic.fna	4	6	6	6	6	1	2	1	6	6	2	N	3	3	6	6	6	6	12	6	1	5	6+	6	3	6	N	5	5	6	2	5	6	6	5	5	6	6	N	6	N	6	6	6	6	6	6	6	3	6	6	6	5	6	12	14	14	14	1	1	13	13	13	12	13	6	6	N	6	6	N	6	6	6	6	6	6	6	6	6	6	6	6	6	6	6	6	6	6	6	N	6	5	6	N	6	6	6	6	5	6	5	6	5	5	6	6	6	5	6	6	6	3	5	1	1	2	5	2	6	4	6	6	6	5	6	6	6	6	6	5	6	6	N	6	6	4	6	6	6	6	5	5	5	6	6	5	6	5	6	6	86	6	6	5	N	1	1	1	1	13	1	1	1	1	N	6	5	5	5	N	4	1	1	1	6	1	1	N	1	N	1	1	1	1	1	1	1	1	1	N	1	1	1	1	6	4	N	1	1	1	1	1	1	1	1	1	1	1	1	1	1	1	1	1	1	N	1	1	1	N	1	1	1	1	1	1	1	6	1	1	1	1	1	1	1	1	N	1	1	N	1	1	1	1	1	1	1	1	1	1	1	1	1	1	1	1	1	1	1	1	1	1	1	N	1	1	1	1	1	1	1	1	1	1	6	1	1	1	1	1	1	1	1	1	1	1	1	1	1	1	1	1	1	1	1	1	1	1	1	1	N	1	1	1	1	1	1	1	1	33-	1	1	1	1	1	1	1	1	1	1	1	N	1-	1	1	1	1	1	N	1	1	1	1	1	1	1	1	1	1	1	1	1	1	1	N	1	1	1	1	1	1	1	1	1	N	1	1	1	N	1	1	1	1	1	1	1	1	1	1	N	1	1	1	1	1	1	1	1	1	1	1	1	1	1	1	1	1	1	1	1	1	1	1	1	6	1	1	N	1	1	1	1	1	1	1	1	1	1	1	1	1	1	1	1	1	1	6	13	1	1	1	1	1	1	1	1	1	1	1	1	1	1	N	1	1	1	1	1	1	1	1	1	1	1	1	1	1	1	1	1	1	N	1	1	1	1	1	1	1	1	1	1	N	1	1	1	1-	1	1	1	1	N	1	1	1	1	1	N	1	1	13	1	6	1	1	1	N	1	1	1	1	17	N	N	1	1	1	1	1	1	1	1	1-	1	1	1	1	1	1	1	1	N	1	1	N	20-	1	1	1	1	1	1	1	1	1	1	1	6	1	1	1	1	1	1	1	1	1	1	3	1	1	1	1	1	1	N	1	1	1	N	1	1	1	1	1	1	1	1	1	1	1	1	1	1	1	1	1	1	1	1	1	1	1	1	1	1	1	1	6	N	1	N	1	1	1	1	1	6	1	1	1	6	N	1	1	1	1-	N	1	N	1	1	1	1	1	1	1	1	1	N	1	1	1	1	N	1	1	1	N	1	N	1	1	N	1	1	1	N	N	1	1	1	N	1	1	1	1	1	1	1	1	1	1	1	1	6	1	19	1	12	11	11	12	N	12	13	13	11	12	11	11	11	N	13	1	1	1	1	1	1	1	1	1	N	1	1	N	1-	1	1	1	1	1	1	1	1	N	1	1	1	N	1	1	0?	1	N	1	6	1	N	1	1	1	N	1	1	N	1	N	1	1	1	1	1	0?	1	1	1	N	1	1	N	N	1	0?	1	1	1	1	1	1	1	1	1	1	1	1	1	240-	N	1	1	1	N	1	1	1	1	6	1	1	N	1	N	1	1	1	1	1	1	1	1	20-	N	1	1	1	N	1	N	1	1	1	1	1	1	N	1	1	N	1	1	1	1	1	1	1	1	1	1	1	6	0?	1	1-	1	1	1	N	1	109-	1	1	1	1	1	1	1	0?	1	213-	1	1	N	N	1	1	1	1	1	1	1	172-	1	1	1	1	1	N	1	1	N	N	N	1	1	1-	N	1	1	N	1	N	1	1	1	1	1	1	1	1	1	1	1	1	N	1	N	1	N	1	1	1	1	1	1	1	1	N	1	6	1	1	1	1	N	1	1	1	N	33-	6	1	69-	1	1	N	1	1	N	1	N	N	1	17	N	1	1	1	1	1	1	1	1	1	1-	N	1	1	N	1	1	1	N	1	1	1	N	N	1	1	N	1-	1-	1	1	N	1	1	1	N	1	1	1	1	1	1	N	1	1	0?	1	1	1	1	1	1	1	1	256-	N	285-	1	148-	1	1	N	110-	1	1	6	1-	1	1	N	1	N	1	1	N	179	N	6	1	1	1	1	1-	1	1	1	1	1	1	1	1	1	1	N	1	N	1	1	N	N	1	1	1	1	1	125-	1-	1	1	0?	1	1-	158-	1	1	N	N	1	1	1	N	N	1	1	1	184-	1	1	1	1	N	1	49-	N	1	N	1	1	1	1	1	1	1	331-	1-	1	N	1	1	1	6	1	1	1	1	1	1	1	1	1	N	1	1	1	N	1	N	1	1	1	N	1	N	1	1	182-	N	1	1-	5	1	1	1	1	1	160-	1	1	1	1	1	1	238-	1	1	1	8	N	269-	1	N	1	1	N	1	1	N	N	1-	1	6	1	1	1	1	1	N	1	1	1	1	1	1	1	1	N	1	1	1	1	1	1	1	1	1	1	N	N	1	1	1	1	1	1	1	1	N	1	1	1	1	0?	1	1	N	0?	105-	1	68-	1	1	N	1	1	1	1	1	1	1	N	438+	441-	1	1	N	1	1	1	1	1	1	N	119-	N	N	1	1	1	1	N	N	N	N	102-	1-	N	1	1	1	1	1	1	1	1-	1	1	N	1	0?	N	1	N	1	1	1	1	1	66-	1	1	N	N	1	1	1	6	1	1	175-	1	N	1	1	N	N	1	1	1	N	N	1	1	1	1	1	1	N	1	1	1	1	1	268-	1	1	1	N	N	N	N	1	N	1	1	1	1	1-	N	6	1	1	1	1	1	1-	N	47-	1	N	1	N	1	1	20-	1	1	14	1	1	1	1	1	1	N	1	1	1	1	N	1	N	6	1	1	1	1	1	1	N	N	114-	1	1	1	1	1	N	1	1-	1	1	1	1	1	1	1	1	158-	1	1	1	1	1	1	1	1	1	1	1	1	1	1-	1	1	N	N	6	1	1	0?	1	1	N	1	1	1	0?	1	1	1	1	1	1	1	N	214-	6	1	N	1	N	1-	1	1	1	N	1	1	1	1	1	1	29-	205-	1	1	1	1	144-	1	1	1	1	N	68-	1	1	1	N	1	0?	N	179	1	N	1	1	1	N	1	1	N	N	1	6	1	N	N	1	1	1	1	N	N	1	N	1	N	1	1	1	1	1	1-	1	1	1	1	1	1	1	1	N	N	N	1	6	1	1	1	1	1	N	1	1	N	1	1	103-	1	1	6	1	1	1	1	1	1	1	1	1	1	1	1	1	N	148-	N	1	33-	1	1	1	1	1	1	1	1	1	1	1	302-	1	1	1	1	1+	1	1	1	N	1	1	17	1	6	N	1	1	413-	1	3	1	N	N	1	1	1	N	1	1	200-	1	N	1	1	N	1	1	1	1	29-	1	1	1	1	1-	1	N	1	1	1	1	1	N	1	1	1	1	N	1	1	1	6	1	1	1	1	1	1	1	N	1	1	1	1	1	1	1	N	1	1	1	1	N	N	1	1	N	1	N	6	5	5	N	6	N	5	5	5	5-	6	5	4	N	5	1	N	6	1	N	6	N	N	5	5	1	N	1	1	1	1	1	N	131-	1	1	1	N	1	1	1	1	1	1	1	1	424-	1	1	1	N	1	1	1	1	1	1	1	1	1	1	1	N	1	1	1	1+	1	1	1	18	22	1	1	1	N	1	1	1	1-	1	1	1	5	N	1	1	1	1	1	1	1	1	1	1	1-	1	N	1	1	1	0?	1	1	1	1	1	1	1	1	N	N	N	1	1	N	1	1	1	1	1	1	1	1	1	1	1	N	N	1	1	1	1	1	1	1	1	6	1	1	1	1	1	1	1	1	1	1	1	1	1	N	1	1	1	1	1	1	1	1	1	1	1	1	6	1	1	1	1	1	1	1	1	1	1	1	1	N	1	1	N	1	1	1	1	1	N	1	1	1	N	N	1	1	1	1	1	1	1	1	1	N	0?	1	N	1	N	6	1	1	119-	1	1	1	1	1	1	1	N	N	159-	N	1	1	1	1	N	27	1	1	1	1	1	1	220-	1-	1	1	1	1	6-	1	1	1	1	N	1	1	N	1	1	1	1	1	1	1	1	1	1	1	1	1	1	1	1	1	1	1	1	1	1	1	1	1	1	1	1	1	1	1	1	141-	1	1	1	1	1	1	N	6	1	1	1	N	1	1	1	1	1	1	N	1	N	1	1	1	N	1	N	1	1	1	1	1	1	1	1	1	N	1	1	1	1	1	1	1	1	1	1	1	N	N	1	1	1	1	1	N	N	1	1	1	1	N	N	N	1	1	1	1	1	1	1	1	N	1	1	1	1	1	1	1	1	1	1	1	N	1	1	1	1	6	1	1	1	1	1	1	1	1	1	1	1	1	1	1	1	1	N	1	1	1	1	1	1	1	1	1	6	1-	1	1	1	1	1	1	1	4	1	N	1	N	N	1	1	1	1	1	1	1	1	1	1	1	1	1	1	1	1	1	6	1	1	1	1	N	1	1	1	1	1	1	1	1	1	1	1	1	N	1	1	1	1	1	1	1	N	1	1	1	1	1	1	1	N	N	1	1	1	1	1	1	1	1	1	1	N	1	1	1	1	1	3	1	1	1	1	1	1	1	1	3	1	1	1	1	1	1	1	1	1	1	1	1	1	1	1	1	1	1	1	1	1	1	1	1	1	1	1	1	1	1	1	1	1	1	1	1	1	1	1	1	1	1	1	1	1	1	1	1	1	1	1	1	1	1	1	1	1	1	1	1	1	3	1	1	1	1	1	1	1	1	1	1	1	1	1	1	1	N	6	1	9	1	1	1	1	6	6	6	6	6	6	9	2	6	1	2	5	1	1	1	6	N	N	3	N	6	N	6-	6	N	6	6	6	6	14	1	5	6	1	6	6	6	5	6	6	6	6	6	6	6	6	21	6	6	6	6	6	N	6	6	6	6	6	6	6	6	6	6	6	6	6	6	N	6	6	6	6	6	6	3	3	3	3	3-	3	3	3	3	3	6	3	3	3	3	6	3	6	6	12	6	6	N	6	6	6	N	6	6	6	5	5	6	6-	6	13	6	6	6	5	1	N	6	6	6	3	5	6	6	6	6	6	4	6	6	6	4	5	6	6	N	5	3	6	5	6	6	N	6	N	N	6	6	N	6	6	6	6	6	6	6	6	6	160-	6	6	2	1	6	6	6	3	3	6	6	6	N	N	6	N	5	5	5	5	13	6	6	6	6	6	6	6	N	N	5	5	5	4	6	6	5	6	5	2	N	6	N	6	2	6	6	6	6	6	6	6	6	N	3	6	13	6	6	6	6	6	N	6	6	6	4	5	5	6	6	5	5	6	6	6	13	6+	0	0
GCA_000505685.2_ASM50568v2_genomic.fna	39	115	74	62	69	1	1	1	69	89	1	59	3	41	82	81	79	57	5	144	1	32	24	80	2	59	82	14	20	61	20	28	71	51	5	49	95	59	69	51	53	19	76	95	88	90	100	1	2	75	111	53	28	9	29	39	35	34	12	93	37	227	88	90	95	135	74	124	116	101	89	91	121	72	65	29	50	111	77	57	80	121	35	83	108	107	90	92	97	80	74	17	13	23	2	2	5	78	49	54	22	48	9	48	58	77	82	74	105	72	16	22	3	27	1	1	1	22	5	61	3	7	52	74	92	7	66	51	80	75	10	12	82	N	52	6	34	56	47	69	112	39	36	9	49	77	13	82	42	54	82	126	72	21	20	26	1	3	77	27	76	73	58	3	27	65	75	103	73	61	75	8	61	74	53	61	12	100	31	79	77	66	1	60	56	70	13	81	62	21	70	58	60	50	65	71	23	2	53	58	89	47	47	77	11	N	1	11	1	1	61	102	34	17	1	44	67	125	66	66	20	5	4	31	23	58	77	62	56	63	49	3	3	3	3	3	68	74	3	57	64	57	59	63	72	45	58	111	4	44	23	45	85	25	93	69	76	89	87	50	66	26	59	1	109	101	81	98	1	77	47	47	51	59	126	90	77	60	23	39	68	44	3	63	18	83	62	36	2	84	15	0?	43	36	73	84	73	74	34	70	68	74	96	63	49	75	58	44	52	19	77	90	1	103	63	1	84	3	75	1	42	28	44	66	69	55	66	68	85	67	64	85	3	68	25	3	104	70	26	95	4	4	1	2	83	1	1	57	3	54	59	1	9	1	57	42	45	41	80	69	8	1	N	50	5	1	74	109	10	10	73	66	55	92	93	71	84	58	27	38	82	74	72	66	69	80	68	44	10	6	66	6	64	72	25	65	51	1	1	67	37	43	1	78	82	81	64	40	98	70	106	23	63	86	66	82	69	94	71	65	42	59	38	2	85	80	1	67	66	49	91	64	52	66	76	59	7	65	32	8	51	3	1	30	90	79	1	36	16	70	1	1	62	55	81	16	80	1	69	57	3	87	52	63	27	41	1	49	3	51	28	63	4	1	51	45	69	86	71	46	9	49	50	58	72	36	68	48	65	55	8	11	68	65	70	69	68	80	N	81	96	77	70	84	74	79	83	70	75	1	117	12	64	94	13	85	1	1	80	4	2	81	44	19	21	5	98	57	29	34	24	63	66	11	99	7	63	8	7	19	84	34	73	62	36	70	41	49	84	62	52	81	21	8	51	94	61	78	3	83	72	84	74	80	64	50	59	3	41	8	47	20	1	24	2	1	28	95	55	58	93	45	15	44	1	4	43	24	12	65	76	60	62	59	76	6	24	101	16	78	72	6	11	12	50	64	6	68	73	1	2	71	68	40	43	18	53	92	4	3	2	3	40	61	22	39	43	21	68	30	57	22	73	19	1	5	67	57	10	98	78	68	57	66	80	75	67	72	84	76	92	114	84	90	36	69	158	10	9	55	80	89	80	97	115	62	52	6	86	85	45	30	91	68	39	67	56	43	60	27	75	70	92	72	54	70	64	65	89	86	69	74	55	21	76	129	78	70	81	9	72	84	28	31	74	47	48	65	85	56	52	11	2	32	1	71	51	71	26	2	104	68	60	10	43	16	58	38	39	55	37	70	57	84	46	64	32	62	59	N	62	76	53	95	17	41	5	15	73	73	26	42	54	53	60	44	57	5	53	60	6	66	64	97	88	33	34	36	37	43	59	33	6	97	83	51	3	56	1	61	86	47	57	16	15	104	74	4	74	98	26	14	89	39	88	79	67	60	56	N	54	2	15	30	28	1	143	74	80	56	62	55	58	9	104	44	53	22	38	48	5	82	2	56	1	43	73	51	N	48	89	40	62	73	62	20	18	20	110	76	53	19	4	52	11	54	102	66	71	69	59	75	54	73	18	30	70	73	77	62	29	84	99	69	64	64	67	73	59	75	75	70	7	66	67	58	58	73	75	76	1	68	82	62	69	52	64	42	83	66	135	69	17	61	68	79	75	9	46	30	1	N	13	10	79	85	65	58	2	41	50	33	87	125	75	4	65	68	17	18	16	91	73	11	27	27	30	27	31	57	57	115	73	64	60	49	73	70	131	4	79	76	1	48	34	74	63	59	50	111	57	46	86	58	72	65	18	26	69	59	67	126	72	44	39	62	55	60	77	84	60	82	71	50	57	40	55	53	70	34	57	38	69	66	64	18	72	60	60	10	66	7	45	9	80	67	70	7	19	41	63	40	9	4	73	80	2	48	38	5	60	49	95	16	71	64	1	52	3	74	31	70	2	63	58	40	60	1	2	70	77	63	56	1	55	50	55	28	80	66	52	43	3	61	46	50	75	47	45	77	1	44	34	1	22	24	60	9	86	43	5	70	75	80	15	13	61	4	1	47	47	63	67	2	107	32	7	81	5	2	6	13	13	45	39	1	86	71	103	15	73	77	10	57	82	70	85	81	63	77	23	N	2	46	87	65	84	92	69	70	71	91	23	27	27	3	3	52	19	33	11	70	105	2+	2	2	68	28	4	3	4	44	76	73	56	77	37	67	38	56	75	76	60	71	68	85	64	89	7	72	66	76	37	69	81	89	40	118	69	28	72	59	68	15	3	66	33	80	62	22	99	97	67	31	77	67	59	64	78	137	9	76	52	67	62	63	68	18	15	116	89	74	68	44	86	6	26	60	64	73	116	268-	87	104	94	69	97	87	73	88	79	70	106	146	10	68	76	101	68	76	77	75	64	81	60	6	96	80	48	81	68	75	71	90	70	23	68	2	55	4	84	71	35	60	53	37	74	64	71	63	58	58	54	62	1	69	83	63	91	55	76	35	84	18	58	70	55	52	34	3	3	93	76	22	58	2	78	72	3	18	75	9	67	2-	2	3	27	8	93	13	33	61	37	14	3	2	49	63	92	34	10	80	4	74	59	78	76	72	44	24	32	6	23	28	55	16	32	13	8	58	11	30	69	35	1	47	9	88	65	48	38	55	69	49	25	25	20	2	33	7	33	34	118	72	6	96	68	108	79	104	29	4	65	70	4	1	80	2	64	57	57	65	80	67	65	60	35	84	89	13	85	92	64	76	65	77	72	2	31	49	78	30	35	3	40	2	81	97	29	37	6	2	1	67	46	51	64	68	9	160	8	43	84	40	79	87	71	16	82	83	82	66	57	71	14	34	47	44	92	76	1	60	4	67	65	69	25	85	24	99	5	25	30	71	110	63	116	116	52	69	66	56	76	79	70	N	65	65	69	23	55	71	57	51	78	86	81	87	37	28	84	34	2	1	1	1	57	68	22	51	59	117	63	104	23	67	1	1	77	74	63	3	56	36	2	54	81	100	26	30	78	6	55	3	9	46	68	80	6	85	82	37	67	66	64	63	78	1	2	76	70	42	63	11	14	47	88	47	24	53	2	1	48	2	1	67	15	18	97	59	70	82	69	1	54	77	1	90	3	65	70	6	N	76	1	156	72	143-	37	60	59	73	52	97	89	119	84	12	57	12	11	10	91	76	7	48	38	60	58	56	33	1	58	129	74	66	7	89	21	24	71	51	32	89	78	64	80	72	9	1	53	68	63	87	92	76	55	76	95	79	45	83	30	68	86	80	72	71	74	83	89	77	76	93	88	82	89	70	76	89	95	79	73	82	102	3	66	83	1	64	1	56	13	1	44	8	69	59	36	76	50	61	31	73	66	81	67	59	83	101	23	112	77	71	31	65	77	58	115	43	99	70	71	17	67	5	60	6	31	79	50	16	77	38	162	77	86	96	23	39	25	38	67	38	18	99	68	65	69	65	60	56	66	56	39	78	54	12	1	56	7	39	64	62	54	67	1	75	15	18	44	16	25	75	49	39	65	35	41	53	59	66	66	32	28	47	131	11	68	19	52	41	1	34	4	79	104	80	46	80	1	55	29	75	12	1	60	15	44	38	18	63	1	46	47	56	77	56	48	1	54	75	2	2	76	39	69	15	N	115	7	7	8	62	73	4	64	74	80	76	77	39	74	123	86	40	33	118	48	44	80	2	69	83	1	1	109	79	76	38	1	75	22	90	0?	75	6	64	4	42	2	0?	99	1	3	1	69	117	4	36	1	1	80	74	78	59	122	57	61	10	10	87	5	81	12	2	61	30	16	9	1	70	10	38	13	70	15	54	46	71	75	46	1	1	1	3	50	91	34	99	75	62	57	42	6	6	103	26	30	36	33	74	1	63	7	67	46	105	71	71	78	70	64	63	79	77	66	97	2	85	56	63	63	1	87	82	62	60	87	69	60	98	3	70	74	93	8	81	18	46	N	68	1	67	23	103	101	2	14	4	55	22	89	43	7	27	58	2	59	53	59	66	42	65	9	6	9	71	96	61	N	69	6	25	31	22	13	88	94	14	56	69	66	54	42	74	39	94	56	67	1	74	39	49	65	41	24	65	68	49	20	80	29	80	45	82	94	4	39	55	90	40	68	41	N	42	102	125	65	67	39	62	1	24	62	64	59	70	67	46	2	84	1	3	11	34	6	7	6	62	72	51	71	11	58	34	59	57	66	1	16	39	2	47	60	1	41	55	43	12	52	38	44	28	26	46	64	30	3	5	39	68	64	57	11	49	82	90	13	34	102	38	83	48	4	74	96	1	1	3	1	1	1	70	14	1	14	1	15	1	1	1	1	1	1	1	1	1	1	1	25	1	1	1	1	53	72	82	46	33	54	64	76	43	86	63	77	5	18	29	5	21	2	62	57	68	21	64	75	76	76	57	22	72	63	72	10	83	59	38	10	4	68	65	102	55	70	10	10	2	8	10	51	10	10	78	3	11	11	11	11	9	57	10	8	9	10	67	101	1	45	25	2	9	90	40	45	1	1	1	42	1	1	30	1	1	11	45	89	150	25	88	1	86	6	6	76	112	67	28	63	33	84	116	8	53	75	6	82	71	60	1	63	36	93	67	65	87	98	62	86	81	64	63	66	71	61	58	72	75	80	80	77	43	75	75	60	85	81	75	76	83	68	79	43	72	81	74	18	82	82	76	82	83	4	48	84	73	65	11	83	71	57	101	82	100	39	84	196	65	50	61	86	137	45	42	90	73	4	70	58	88	64	75	87	10	73	52	2	86	89	61	67	1	65	37	26	70	21	74	5	96	22	53	9	4	64	95	59	4	1	88	15	44	91	60	68	107	71	109	35	73	50	75	52	14	64	78	58	76	93	84	60	76	2	1	7	84	71	6	4	76	69	85	250-	88	83	92	186	93	4	76	87	76	88	96	48	65	31	58	77	98	71	4	12	9	12	16	82	71	2	2	57	9	17	2	1	18	85	83	71	5	64	5	5	69	1	96	102	60	109	70	5	5	5	97	5	5	1	3	5	67	87	65	1	4	4	4	96	2	0	0
GCA_000509305.1_ASM50930v1_genomic.fna	4	60	6	6	6	1	2	1	6	6	2	6	3	3	6	6	6	6	12	6	1	5	6+	6	3	6	6	5	5	6	2	5	6	6	5	84-	6	6	6	6	5	6	6	N	6	6	6	6	3	6	N	6	5	6	12	78	14	14	1	1	13	13	13	12	13	6	6	6	6	6	6	6	6	6	6	6	6	6	6	6	6	6	6	6	6	6	6	6	548-	6	182-	6	5	6	5	6	45	6	6	5	6	5	6	N	5	6	6	6	5	6	6	6	3	5	1	1	2	5	2	6	4	6	6	6	5	6	6	6	6	6	5	6	6	N	6	6	4	6	6	6	6	5	5	N	6	6	5	6	5	6	6	6	6	6	5	6	1	1	1	1	13	1	1	1	1	6	6	5	5	5	6	4	1	1	1	6	1	N	1	1	1	1	1	1	1	1	1	1	1	1	1	1	1	1	N	6	4	1	1	1	1	1	1	1	1	1	1	1	1	1	1	1	1	1	1	1	N	1	1	1	1	1	1	1	1	1	1	N	6	1	1	1	1	1	1	1	1	1	1	1	1	1	1	N	1	1	1	1	1	N	1	1	1	1	1	1	N	1	1	1	1	1	1	N	1	1	1	1	1	1	1	1	1	1	1	6	1	1	1	1	N	1	1	1	1	1	1	1	1	1	1	1	1	1	1	1	1	61	1	1	1	1	1	1	1	1	1	1	N	1	1	1	1	1	1	1	1	1	1	1	1	1	1	1	N	1	1	1	1	1	1	1	1	1	1	1	1	1	1	1	1	1	1	1	1	1	1	1	1	1	1	1	1	1	1	1	1	1	1	1	1	1	1	1	1	1	1	1	1	1	1	1	1	1	1	1	1	1	1	1	1	1	1	1	1	1	1	1	1	1	53	1	1	1	1	6	1	1	1	1	N	1	N	1	1	1	1	1	1	1	1	1	1	1	1	1	1	6	13	1	1	1	1	1	1	1	1	1	1	1	1	1	1	1	1	1	1	1	1	1	1	1	1	1	1	1	1	1	N	1	1	1	1	1	1	1	1	1	1	1	1	1	1	1	1	1	1	1	1	1	1	1	1	1	1	1	1	1	1-	1	1	1	1	6	1	1	N	1	1	1	1	1	1	N	1	1	1	1	1	1	1	1	1	67	1	1	1	1	1	1	1	1	63	1	1	1	1	1	1	1	1	1	1	1	1	1	1	1	6	1	1	1	1	1	1	1	1	1	1	3	1	1	1	1	1	1	1	1	1	1	1	1	1	1	1	1	1	1	1	1	1	1	1	1	1	1	1	1	1	1	1	1	1	1	1	1	1	1	1	6	1	1	1	1	1	1	1	1	6	1	1	1	6	1	1	1	1	1	1	1	1	1	1	1	1	1	1	1	1	1	1	1	N	1	1	1	1	1	N	1	1	1	1	1	1	1	1	1	1	1	1	1	1	1	1	1	1	1	1	1	1	1	1	1	1	1	6	1	1	1	12	11	11	12	10	12	13	13	11	12	11	11	11	13	13	1	1	1	1	1	1	1	N	1	1	1	1	1	1	1	1	1	1	1	1	1	1	1	1	1	1	1	1	N	1	1	6	1	6	1	1	1	1	1	1	1	1	1	1	N	1	1	1	1	1	1	1	1	1	1	1	1	1	1	1	1	1	1	1	1	1	1	1	N	1	1	1	1	1	1	1	1	1	1	1	1	1	1	1	6	1	1	1	1	1	N	1	1	1	1	1	1	1	1	N	1	1	1	1	1	1	1	1	1	1	N	1	1	1	1	1	1	N	1	1	1	1	1	N	1	1	1	N	1	1	1	1	1	1	1	1	1	1	1	1	1	123	1	1	1	1	1	1	1	6	1	1	1	1	1	1	1	1	1	1	1	1	1	1	1	1	1	1	1	1	1	1	1	1	1	1	1	1	1	1	1	1	1	1	1-	1	1	N	56	1	1	N	1	1	1	1	1	1	1	1	1	1	1	1	1	1	6	1	1	N	1	1	1	1	1	1	1	6	1	N	1	1	N	1	1	1	1	1	1	1	1	1	1	1	1	1	N	1	1	1	1	1	49	1	1	N	1	1	1	1	1	1	N	1	1	1	1	1	1	1	1	1	1	1	1	1	N	1	1	1	1	1	1	1	1	1	1	1	1	1	1	1	1	1	1	1	1	N	1	59	N	N	1	1	1	1	6	1	1	1	1	1	1	1	1	1	1	N	6	1	1	1	1	1	1	1	1	1	51	1	1	1	1	1	55-	N	1	1	1	1	1	1	1	1	1	13	1	1	1	1	N	1	1	1	1	1	N	1	1	1	1	1	1	1	1	1	1	1	1	1	N	1	1	1	N	1	1	1	1	1	1	1	1	1	1	1	1	1	1	1	1	6	1	1	1	1	1	1	1	1	1	N	1	1	1	1	1	N	N	1	1	1	1	1	1	1	1	N	1	N	5	1	1	1	1	1	1	1	1	1	1	1	1	N	1	N	1	8	1	1	1	1	1	1	1	1	1	1	1	1	1	6	1	1	N	1	1	1	1	1	1	N	1	1	1	1-	1	1	1	1	1	1	1	1	1	1	1	1	1	1	1	1	1	1	1	1	1	1	1	1	1	1	1	1	1	1	1	1	1	1	1	1	1	1	1	1	1	1	1	N	6	438+	6	1	1	1	N	1	1	1	1	1	1	1	1	1	1	1	1	1	1	1	1	1	1	1	1	1	1	1	1	1	1	1	N	1	1	1	1	1	1	1	1	1	1	1	1	1	1	1	1	1	1	1	1	1	6	1	1	1	1	1	1	1	1	1	1	1	314-	1	12	1	1	1	1	1	1	1	1	1	1	1	1	1	1	1	1	1	1	N	1	1	1	1	1	1	1	1	1	6	1	1	1	1	1	1	1	1	1	1	1	N	1	1	22	1	1	1	1	1	1	1	1	1	1	1	1	1	1	1	1	1	6	1	1	1	1	1	1	1	1	1	1	1	1	1	1	1	1	1	1	1	1	N	48	1	1	1	1	N	1	1	1	1	1	1	1	N	1	1	1	1	1	1	1	1	1	6	1	1	1	1	6	N	1	1	1	1	1	1	1	1	1	1	235-	134-	1	6	1	1	1	1	N	1	1	1	6	1	1	1	1	1	1	1	1	1	1	1	1	1	1	1	1	1	N	N	N	1	1	1	1	1	1	1	1	1	N	1	1	6	1	1	56	1	1	6	1	1	1	1	1	1	1	1	1	1	1	1	1	1	1	N	1	1	1	1	1	1	1	1	1	1	1	1	N	1	1	6	1	1	1	1	1	1	1	1	1	1	N	1	1	1	6	N	1	1	1	1	1	1	1	1	1	1	1	1	1	1	1	1	1	1	1	1	1	1	1	1	1	1	1	1	1	1	1	1	1	1+	1	1	39	1	1	N	N	1	6	1	1	1	1	1	1	1	1	1	1	1	1	1	N	1	1	N	1	1	1	1	1	1	1	1	1	1	1	1	1	1	1	1	1	1	1	1	N	N	1	1	1	1	6	1	1	1	6	1	1	1	1	1	1	1	1	1	1	1	1	1	1	1	1	1	1	47	1	1	1	1	1	1	1	1	6	5	5	5	6	5	5	5	5	5	6	5	4	N	5	1	6	6	1	1	6	6	5	5	5	1	1	74	1	1	1	1	1	1	1	1	1	1	1	N	1	1	1	1	1	1	1	1	1	1	1	1	1	1	1	1	1	1	1	1	1	1	1	1	1	1	1+	1	1	1	6	1	1	1	1	1	1	1	N	1	1	1	1	5	1	1	1	1	1	1	1	1	1	1	1	1	1	1	1	1	1	1	1	1	1	1	1	1	1	1-	N	1	1	1	1	1	1	1	N	1	1	1	1	1	1	1	1	1	1	1	1	1	1	1	1	1	1	6	1	1	1	1	1	1	1	1	1	1	1	1	1	1	1	1	1	1	1	1	1	1	1	1	1	1	6	1	1	1	1	1	1	1	1	1	1	1	1	1	1	1	1	1	1	1	1	1	1	N	1	1	1	N	1	N	1	1	1	1	1	1	1	N	N	1	1	1	1	6	1	1	1	1	1	1	1	1	1	1	N	6	1	N	1	1	1	1	1	1	1	1	1	1	1	1	1	1	1	1	1	N	6	1	1	1	1	N	1	1	1	1	1	1	1	1	1	1	1	1	1	1	1	1	1	1	1	1	1	1	1	1	1	1	1	1	1	1	1	1	1	1	1	1	1	1	1	1	1	1	1	6	1	1	1	1	1	1	1	1	1	1	1	1	1	1	1	1	N	1	1	1	1	1	1	1	1	1	1	1	1	1	1	1	1	1	1	1	1	1	1	1	1	1	1	1	1	1	1	1	1	1	1	1	1	1	N	1	1	1	1	1	1	1	1-	1	1	1	1	1	1	1	1	1	N	1	1	1	1	1	1	1	1	6	1	1	1	1	1	1	1	1	1	1	1	1	1	1	1	1	1	1	1	1	N	1	1	1	1	1	6	N	1	1	1	1	1	N	1	4	1	1	1	1	1	1	1	1	1	1	1	1	1	1	1	1	1	1	1	1	1	1	6	N	1	1	1	1	1	1	1	1	1	1	1	1	1	1	1	1	1	1	1	1	1	1	1	1	1	1	1	1	1	1	1	1	1	1	1	1	1	1	1	1	1	1	1	1	1	1	1	N	1	1	3	1	1	1	1	1	1	1	1	3	1	1	1	1	1	1	1	1	1	1	1	1	1	1	1	1	1	1	1	1	1	1	1	1	1	1	1	1	1	1	1	1	1	1	1	1	1	1	1	1	1	1	1	1	1	1	1	1	1	1	1	1	1	1	1	1	1	1	1	1	1	3	1	1	1	1	1	1	1	1	1	1	1	1	1	1	N	1	6	1	1	1	1	1	N	6	6	6	6	6	6	9	2	6	1	2	5	1	1	1	6	N	6	3	6	6	N	6	6	6	6	6	6	6	14	1	5	6	1	6	6	6	5	6	6	6	6	6	6	6	6	6	6	6	6	6	6	6	6	N	6	6	6	6	6	6	6	6	N	6	6	6	6	6	6	6	6	6	6	3	3	3	3	3	3	3	3	3	3	N	3	3	3	3	6	3	6	6	12	6	6	4	6	6	6	6	6	6	6	5	5	6	6	6	13	6	6	6	5	1	6	6	6	6	3	5	6	6	6	6	6	4	6	6	6	4	5	6	6	6	5	3	6	5	6	6	6	N	6	6	6	6	6	6	6	6	6	6	6	6	6	6	160+	6	6	2	1	6	6	6	3	3	6	6	6	6	N	N	6	5	5	5	5	13	6	6	6	6	6	6	6	6	6	5	5	5	4	6	6	5	6	5	2	5	6	N	6	2	N	6	6	6	6	6	6	6	N	3	6	13	6	6	6	6	6	6	6	6	6	4	5	5	6	6	5	5	6	6	6	13	6+	0	0
GCA_000509325.1_ASM50932v1_genomic.fna	4	6	6	6	N	1	2	1	6	6	2	6	3	3	6	6	6	6	12	6	1	5	6+	6	3	6	6	5	5	6	2	25	53	6	5	5	6	6	6	6	5	6	60	6	6	6	6	6	3	6	6	6	5	6	12	14	14	14	1	1	13	13	13	12	13	6	6	6	6	6	6	6	6	6	6	6	6	6	6	6	6	6	6	6	6	6	6	6	548-	6	182-	6	5	6	5	6	6	6	6	5	6	5	6	5	5	6	6	6	5	6	56	6	3	5	1	1	2	5	2	6	4	6	6	6	5	6	6	6	6	6	5	6	6	N	6	6	4	6	6	6	6	5	5	5	6	6	5	6	5	6	6	6	6	6	5	6	1	1	1	1	13	1	1	1	1	6	6	5	5	5	6	4	1	1	1	6	1	1	1	1	1	1	1	1	1	1	1	1	1	1	1	1	1	1	1	6	4	1	1	1	1	1	1	1	1	1	1	1	1	1	1	1	1	1	1	1	1	1	1	1	1	1	1	1	1	1	1	1	6	1	1	1	1	1	1	1	1	1	1	1	1	1	1	1	1	1	1	1	1	1	1	1	1	1	1	1	1	1	1	1	1	1	1	1	1	N	1	1	1	1	1	1	1	1	1	6	1	1	1	1	1	1	1	1	1	1	1	1	1	1	1	1	1	1	1	1	1	1	1	1	1	1	1	1	1	1	1	1	1	1	1	1	1	1	1	1	1	1	1	1	1	1	1	1	1	1	1	1	1	1	1	1	1	1	1	1	1	1	1	1	1	1	1	1	1	1	1	1	1	1	1	1	1	1	1	1	1	1	1	1	1	1	1	1	1	1	1	1	1	1	1	1	1	1	1	1	1	1	1	1	1	1	1	1	1	1	1	1	1	1	1	1	1	1	1	6	1	1	1	1	1	1	1	1	1	1	1	1	1	1	1	1	1	1	1	72	1	6	13	1	1	N	1	1	1	1	1	1	1	1	1	1	1	1	1	1	1	1	1	1	1	1	1	1	1	1	1	1	1	1	1	1	1	1	N	1	N	1	1	1	1	1	1	1	1	1	1	1	1	1	1	1	1	1	1	1	1	1	1	1	1	1	1	6	1	1	1	1	1	1	1	1	1	1	1	1	N	1	1	N	1	1	1	1	1	1	1	1	1	1	1	1	1	1	1	1	1	1	1	1	1	1	1	1	1	1	1	1	6	1	1	1	1	1	1	1	1	N	1	3	1	1	1	1	1	1	1	1	1	1	1	N	1	1	1	1	6	1	1	1	1	1	1	1	1	1	1	1	1	1	1	1	1	1	1	1	1	1	1	6	1	1	1	1	1	1	1	1	6	1	1	1	6	1	1	1	N	1	1	1	1	1	1	1	1	1	1	1	1	1	1	1	1	1	1	1	1	1	1	1	1	1	1	1	1	1	1	1	1	1	1	1	1	1	1	1	1	1	1	1	N	1	1	1	1	1	6	1	N	1	12	96	11	12	10	12	133	13	11	12	11	11	11	13	13	1	1	1	1	1	1	1	1	1	1	1	1	N	1	1	1	1	1	1	1	1	1	1	1	1	1	1	1	1	1	1	6	1	6	1	56	1	1	1	1	1	1	1	1	1	1	1	1	1	1	1	1	1	1	1	1	1	1	1	1	1	1	1	1	46	48	1	1	1	1	1	1	1	1	1	1	1	1	1	1	1	1	1	1	6	1	1	1	1	1	1	1	1	1	1	1	1	1	1	1	1	1	1	53	1	0?	1	1	1	1	1	1	1	1	1	1	1	38	1	1	1	1	1	1	1	1	1	6	1	1	1	1	1	1	N	1	1	1	1	1	1	1	1	1	1	1	1	1	1	6	1	1	1	1	1	1	1	1	1	1	1	1	1	1	1	1	1	1	1	1	1	1	1	1	1	1	1	1	1	1	1	1	1	1	1-	1	1	1	1	1	1	1	1	1	1	1	1	1	1	1	1	1	1	1	1	1	6	1	1	1	1	1	1	1	1	1	1	6	1	1	1	1	1	1	1	1	1	1	1	1	1	1	1	1	1	1	1	1	1	1	1	1	1	1	1	1	1	1	N	62	1	1	1	1	1	1	1	1	1	1	1	1	1	1	1	1	1	1	1	1	1	1	1	1	1	1	1	1	1	1	1	1	1	1	1	1	1	1	1	1	1	1	1	1	1	1	6	1	1	1	1	1	1	1	1	1	1	1	6	N	1	1	1	1	1	1	1	1	1	1	1	1	1	1	1	1	1	1	1	76	1	1	1	1	1	62	1	1	1	1	1	1	1	1	1	1	1	1	1	1	1	1	1	1	1	1	1	1	1	1	1	1	1	1	N	1	1	1	1	1	1	1	1	1	1	1	1	1	1	1	1	6	38	1	1	1	1	1	1	1	1	1	1	1	1	1	1	1	1	1	1	1	1	1	1	1	N	1	1	1	5	1	1	1	1	1	1	1	1	34	1	1	1	1	71	1	1	8	1	1	1	1	1	1	1	1	1	1	1	1	1	6	1	1	1	1	1	1	1	1	1	1	1	1	1	1	1	1	1	1	1	1	1	1	1	1	1	1	1	1	1	1	1	1	1	1	1	1	1	1	1	1	1	1	1	1	1	1	1	1	1	1	1	1	1	1	1	1	1	1	6	438+	6	1	1	1	1	1	1	1	1	1	1	1	1	1	1	1	1	1	1	1	1	1	1	N	1	1	1	1	1	1	1	1	1	1	1	1	1	1	1	82	1	1	1	1	1	1	1	1	1	1	1	1	1	1	6	1	1	1	1	1	1	1	1	N	1	1	1	1	1	1	1	1	1	1	1	1	1	1	1	1	1	1	1	1	1	1	1	1	1	1	1	1	1	1	1	1	1	6	1	1	1	1	1	1	1	1	1	1	1	1	1	1	1	1	1	1	1	1	1	1	1	1	1	1	1	1	1	1	1	1	6	1	1	1	1	1	1	1	1	1	1	1	1	1	1	1	N	1	1	1	1	1	1	1	1	1	1	1	39	1	1	1	1	1	1	N	1	1	1	1	1	1	1	1	1	6	1	1	1	1	6	1	1	1	1	1	1	1	1	1	1	1	1	1	1	6	1	1	1	1	1	1	1	1	6	1	1	1	1	1	1	1	1	1	1	N	1	1	1	1	1	1	1	1	1	1	1	1	1	1	1	1	1	1	1	1	1	6	1	N	1	1	1	6	1	1	1	1	1	1	1	1	1	1	1	1	1	1	1	1	1	1	1	1	1	1	1	1	1	1	1	1	1	1	1	6	1	1	1	1	1	1	1	1	1	1	1	1	1	1	6	1	1	65	1	1	1	1	1	1	1	1	1	51	1	1	1	1	1	1	5	1	1	1	1	1	1	1	1	1	1	1	1	1	1	1+	1	1	1	1	1	1	1	1	6	N	1	1	1	1	1	1	1	1	1	1	1	1	1	1	1	1	1	1	1	1	1	1	1	1	1	1	1	1	70	1	1	1	1	1	1	1	1	1	1	65	1	1	6	N	1	1	6	1	6	1	84	1	1	N	1	1	1	1	1	1	N	1	1	1	1	1	N	1	1	1	1	1	1	1	6	5	5	5	6	5	5	5	5	5	6	5	4	5	5	1	6	6	1	1	6	79	5	5	5	1	1	1	1	1	1	1	1	N	1	1	1	1	1	1	1	1	1	1	1	1	1	1	1	1	1	1	1	1	1	1	1	1	1	1	1	1	1	1	1	1	1+	1	1	1	6	1	N	1	1	1	1	1	1	1	1	1	1	5	1	1	1	1	1	1	1	1	1	1	1	1	1	1	1	1	N	1	1	1	1	1	1	1	1	1	1	1	1	1	1	1	N	1	1	1	1	1	1	1	1	1	1	1	1	1	1	1	N	1	1	1	1	6	1	1	1	1	1	1	1	1	1	1	1	1	1	1	1	1	1	1	1	1	1	1	1	1	1	1	6	1	1	1	1	1	1	1	1	1	1	49	1	1	1	1	1	1	1	1	1	1	57	1	1	1	1	6	1	1	1	1	1	1	1	1	1	N	1	1	1	1	1	6	1	1	1	1	1	1	1	1	1	1	1	6	1	6	N	1	1	1	1	1	1	1	1	1	1	1	1	1	1	1	1	1	6	1	1	1	1	N	1	1	1	1	1	1	1	1	1	1	1	1	1	1	1	1	1	1	1	1	1	1	1	1	1	1	1	1	1	1	1	1	1	1	1	1	1	1	1	1	1	1	N	6	1	1	1	1	1	1	1	1	1	1	1	1	1	1	1	1	1	1	1	1	1	1	1	1	1	1	1	1	1	1	1	1	1	1	1	1	1	1	1	1	1	1	1	1	1	1	1	1	87	1	1	1	1	1	1	1	1	1	1	1	1	1	1	N	1	1	1	1	1	1	1	1	1	1	1	1	1	1	1	1	1	6	1	1	1	1	1	1	N	1	1	1	1	1	1	1	1	1	1	1	1	1	N	N	1	1	1	1	6	1	1	1	1	1	N	1	1	4	1	1	1	1	1	1	1	1	1	1	1	1	1	1	1	1	1	1	1	1	1	1	6	1	1	1	1	1	1	1	1	1	1	1	1	1	1	1	1	1	1	1	1	1	1	1	1	1	1	1	1	1	1	1	1	1	1	1	1	1	1	1	1	1	1	1	1	1	1	1	1	1	1	1	3	1	1	1	1	1	1	1	1	3	1	1	1	1	1	1	1	1	1	1	1	1	1	1	1	1	1	1	1	1	1	1	1	1	1	72	1	1	1	1	1	1	1	1	1	1	1	1	1	1	1	1	1	1	1	1	1	1	1	1	1	1	1	1	1	1	1	1	1	1	1	3	1	1	1	1	N	1	1	1	1	1	1	1	1	1	1	1	6	1	1	1	1	1	1	6	6	6	6	6	6	9	2	6	1	2	5	1	1	1	6	6	6	3	6	6	6	6	N	N	6	51	6	6	14	1	5	6	1	6	6	6	5	6	6	6	6	6	6	6	6	6	6	6	6	6	6	6	6	6	6	6	6	6	6	6	6	6	6	6	6	6	6	6	6	6	6	6	6	3	3	3	N	3	3	3	3	3	3	6	3	3	3	3	6	3	6	6	12	6	6	4	6	6	6	6	6	6	6	5	5	6	6	6	13	6	6	N	5	1	6	6	6	6	3	5	6	6	6	6	6	4	6	6	6	4	5	6	6	6	5	3	6	5	6	6	6	6	6	6	6	6	6	41	6	6	6	6	6	6	6	6	160+	6	6	31	1	6	6	6	3	3	6	6	6	6	6	6	6	5	5	5	5	13	6	6	6	6	6	6	6	6	6	5	5	5	4	6	6	5	6	5	2	5	6	6	N	2	6	6	66	6	6	N	6	6	6	3	6	13	6	6	6	6	6	6	6	6	6	4	5	5	6	6	5	5	6	6	6	13	6+	0	0
GCA_000509345.1_ASM50934v1_genomic.fna	4	6	6	6	6	1	2	1	6	6	2	6	3	3	6	6	6	6	12	6	1	5	6+	6	3	6	6	5	5	6	2	5	6	N	5	42	6	6	6	6	5	6	6	6	6	6	6	6	3	6	6	6	5	6	12	14	14	14	1	1	13	13	13	12	13	N	6	6	6	6	6	6	6	6	6	6	6	6	6	6	6	6	6	6	6	6	6	6	548-	6	182-	6	5	6	5	6	6	6	6	5	6	5	6	5	5	6	6	6	N	6	6	6	3	5	1	1	2	5	2	6	4	6	6	6	66	6	6	6	6	6	5	6	6	N	6	6	4	6	6	6	6	5	5	5	6	6	5	6	5	6	6	N	6	6	5	6	1	1	1	1	13	1	1	1	1	6	6	5	5	5	6	4	1	1	1	6	1	1	1	1	1	1	1	1	1	1	1	1	1	1	1	1	1	1	1	6	4	1	1	1	1	1	1	1	1	1	1	1	1	1	1	1	1	1	1	1	N	1	1	1	1	1	1	1	1	1	1	1	6	1	1	1	1	1	1	1	1	1	N	1	1	1	1	N	1	1	1	1	1	1	1	1	1	1	N	1	1	1	1	1	1	1	1	N	1	1	1	1	1	1	1	1	1	1	1	6	1	1	1	1	1	10	1	1	1	1	1	1	1	1	1	1	1	1	1	1	1	1	1	1	1	1	1	1	1	1	1	1	1	1	1	1	1	1	1	1	1	1	1	1	1	1	1	1	N	1	1	1	1	1	1	1	1	1	1	1	1	1	1	1	1	1	1	1	1	1	1	1	1	1	1	1	1	1	1	1	1	1	1	1	1	1	1	1	1	1	1	1	1	1	1	1	1	1	1	1	1	1	1	1	1	1	1	1	1	1	1	1	1	1	1	1	1	1	1	6	1	1	1	1	N	1	1	1	1	1	1	1	1	1	1	1	1	1	1	1	1	79	13	1	1	1	N	1	1	1	1	1	N	1	1	1	1	1	1	1	1	N	1	1	1	1	1	1	1	1	1	1	1	1	1	1	1	1	1	1	68	1	1	1	1	58	1	1	1	1	1	1	1	1	1	1	1	1	1	1	1	1	1	1	1	1	1	6	1	1	1	1	1	1	1	1	1	1	1	1	N	1	1	1	1	1	1	1	1	1	1	1	1	1	1	1	1	1	1	1	1	1	1	1	1	1	1	1	1	1	1	1	6	1	1	1	1	1	1	1	1	1	1	3	1	1	1	1	1	1	N	1	1	1	N	1	1	1	1	77	6	1	1	1	1	N	1	1	1	1	1	1	1	1	1	1	1	1	1	1	1	1	1	6	1	1	1	1	1	1	1	1	6	1	1	1	6	1	1	1	1	1	1	1	1	1	1	1	1	1	1	1	1	1	1	1	1	1	1	1	1	1	1	1	1	1	1	1	1	1	1	1	1	1	1	1	1	1	1	1	1	1	1	1	1	1	1	1	1	1	6	1	N	4	4	4	4	6	4	6	6	N	4	11	11	11	11	13	N	1	1	1	1	1	1	1	N	1	1	1	1	30	111-	1	1	1	1	1	1	1	1	1	1	1	1	1	1	1	1	1	6	1	6	1	1	1	1	1	N	1	1	1	1	1	1	1	1	1	1	1	1	1	1	1	N	1	1	N	1	1	1	1	1	1	1	1	1	1	1	1	1	1	1	N	1	1	1	1	1	1	1	1	1	6	1	1	1	1	1	1	1	1	1	1	1	1	1	1	1	1	1	1	1	1	1	1	1	1	1	1	1	1	1	1	1	1	1	1	1	1	1	1	1	1	1	1	6	1	1	N	1	1	1	1	1	1	1	1	1	1	1	1	1	1	1	1	1	1	6	1	1	1	1	1	N	1	1	1	1	1	1	1	1	1	1	1	1	1	N	1	1	1	1	1	1	1	1	1	1	1	1	N	1	1-	1	1	1	1	1	1	1	1	1	1	1	1	1	1	1	1	1	1	1	1	1	6	1	1	1	1	1	1	1	1	1	1	6	1	1	1	1	1	1	1	1	1	1	1	1	1	1	1	1	1	1	1	1	1	N	1	1	N	1	1	N	1	1	1	1	1	1	1	1	1	1	1	1	1	1	1	1	N	1	1	1	1	1	1	1	1	1	N	1	1	1	1	1	1	1	1	1	1	1	1	1	1	1	1	1	1	1	1	1	1	1	6	1	1	1	1	1	1	1	1	1	1	1	6	1	1	1	1	1	1	1	1	1	1	1	1	1	1	1	N	1	1	1	1	1	1	1	1	1	1	1	1	1	1	1	1	1	1	1	1	N	1	1	1	N	1	1	1	1	1	1	1	1	1	1	1	1	1	1	1	N	1	1	1	1	1	N	1	1	N	N	1	1	1	1	1	6	1	1	1	1	1	1	1	1	1	1	1	1	1	1	1	1	1	1	1	1	1	1	1	1	N	1	1	1	5	N	1	1	1	1	1	11	1	1	1	1	1	1	1	1	1	8	1	1	1	1	1	1	1	1	61	N	1	1	1	6	1	1	1	1	1	1	1	1	1	1	1	1	1	1	1	1	1	1	1	1	1	1	1	1	1	12	1	1	1	1	1	1	N	1	1	1	1	1	1	1	67	1	1	1	1	1	1	68	1	1	1	1	1	1	1	1	1	1	6	438+	6	1	1	1	1	1	1	1	1	1	1	1	1	1	1	1	1	1	1	1	1	N	1	1	1	1	1	1	1	1	46	1	1	1	1	1	1	1	1	1	N	N	1	1	1	1	1	1	1	1	1	1	1	1	6	1	1	1	1	1	N	1	1	1	1	1	1	1	1	1	1	1	1	N	1	1	1	1	1	1	1	1	1	1	1	1	1	1	1	1	N	1	1	1	1	1	N	6	1	1	1	1	1	N	1	1	1	1	N	1	1	1	1	1	1	1	1	1	1	1	1	1	1	1	1	1	1	1	1	1	6	1	1	1	1	1	1	1	1	1	1	1	1	1	1	1	1	1	1	1	1	1	1	1	1	N	1	1	1	1	1	1	1	1	1	1	1	1	1	1	1	1	1	1	1	6	1	1	1	1	6	1	1	1	1	1	1	1	1	1	1	1	1	1	1	6	1	1	1	1	1	1	1	1	6	1	1	1	1	1	1	1	1	1	1	1	1	1	1	1	1	1	1	1	1	1	1	1	1	1	1	1	1	N	1	1	1	6	1	1	1	1	1	6	1	1	1	1	1	1	1	1	1	1	1	1	1	1	1	1	1	1	85	1	1	1	1	1	1	1	1	1	1	1	1	6	1	1	1	1	1	1	1	1	1	1	N	1	1	1	6	1	1	1	1	1	1	1	1	N	1	1	1	1	N	1	1	1	1	1	1	1	1	1	1	1	1	1	N	1	1	1	1	59	1	1+	1	26	1	N	56	1	64	N	6	1	1	1	1	1	1	1	1	1	1	1	1	65	1	1	1	1	1	1	1	1	1	1	1	1	1	1	1	1	1	1	1	1	1	1	1	1	1	1	1	1	1	1	6	1	1	1	6	1	6	1	1	1	1	1	1	1	1	1	1	1	1	1	1	N	1	1	1	1	1	1	1	1	1	1	6	5	5	5	6	N	69	5	5	N	N	5	4	N	5	1	6	6	N	1	6	6	5	5	5	1	1	1	1	1	N	1	1	1	1	1	1	1	1	1	1	1	1	1	1	1	1	1	N	1	1	1	1	1	1	1	1	1	1	1	1	1	1	1	1	1	1+	1	1	1	6	1	1	1	1	62	1	1	1	1	1	1	1	5	1	1	1	1	1	49	1	1	1	1	1	1	1	1	1	1	1	1	1	1	1	1	1	1	1	1	N	1	1	1	42	1	1	1	1	1	1	1	1	1	1	1	1	1	1	1	1	1	1	1	1	1	1	6	1	N	1	1	1	1	1	1	1	1	1	1	1	1	1	1	1	1	1	1	1	1	1	1	1	1	6	1	1	1	1	1	1	1	1	1	1	1	1	1	1	1	1	1	1	1	1	1	1	1	1	1	1	6	1	1	1	1	1	1	1	1	1	N	1	N	1	1	1	6	1	1	1	N	1	1	1	1	1	1	1	6	1	6	1	1	0?	1	1	1	1	1	1	1	1	1	1	N	1	1	1	1	6	1	1	1	1	1	1	1	1	1	1	1	1	1	1	1	1	1	1	1	1	1	1	N	1	1	1	1	1	1	N	1	1	1	1	1	1	1	1	1	1	1	1	1	1	1	1	1	1	6	1	1	1	N	1	1	1	1	1	1	1	1	1	1	1	1	1	1	1	1	1	1	1	1	1	1	1	1	1	1	1	1	1	1	1	1	1	1	1	1	1	1	1	1	1	1	1	1	1	1	1	1	1	1	1	1	1	1	1	1	1	1	1	1	N	1	1	1	1	1	1	1	1	1	1	1	1	1	1	1	1	6	1	1	1	1	1	1	1	1	1	1	1	1	1	1	1	1	1	1	1	1	1	1	1	1	N	1	6	67	1	1	1	1	1	N	1	4	1	1	1	1	N	1	1	1	1	1	1	1	1	1	1	1	1	1	1	1	1	1	6	1	1	1	N	1	1	1	1	1	N	1	1	1	1	1	1	1	1	1	1	1	1	1	1	1	1	1	1	1	1	1	1	1	1	1	1	1	1	1	1	1	1	1	1	1	1	1	1	1	1	1	3	1	1	1	1	1	1	1	1	3	1	1	1	1	1	1	1	1	1	1	1	1	1	1	1	1	1	1	1	1	1	1	1	1	1	1	1	1	1	1	1	1	1	1	1	1	N	1	1	1	1	1	1	1	1	1	1	1	1	1	1	1	1	1	1	1	1	1	1	1	1	3	1	1	1	1	N	1	1	1	1	1	1	1	1	1	1	1	6	1	1	1	1	1	1	6	6	6	6	6	6	9	2	6	1	2	5	1	1	1	6	6	6	3	6	6	6	6	6	6	6	6	6	6	N	1	5	6	1	6	6	6	5	6	6	6	6	6	6	6	6	6	6	6	6	6	6	6	6	6	6	6	6	6	6	6	6	6	6	6	6	6	6	6	6	6	6	6	6	3	3	3	3	3	3	3	3	3	3	6	3	3	3	3	N	N	6	6	12	6	6	4	6	6	6	6	6	6	6	5	5	6	6	6	13	6	6	6	5	1	6	6	6	6	3	5	6	6	6	6	6	4	N	6	6	4	5	6	6	6	5	3	6	5	6	69	6	6	6	6	6	6	6	6	6	6	6	6	6	6	6	6	160+	6	6	2	1	6	6	6	3	3	6	6	6	6	6	6	6	5	5	5	5	13	6	6	6	6	6	6	6	6	6	5	5	5	4	6	6	5	N	5	2	5	6	N	6	2	6	6	6	6	6	6	6	6	6	3	6	13	6	6	6	6	6	6	6	6	6	4	5	5	6	6	5	5	6	6	6	13	6+	0	0
GCA_000515795.2_gabuh19608_v01_genomic.fna	7	11	10	10	10	1	1	1	11	11	1	10	1	9	11	10	11	11	10	11-	9	6	11	11	5	11	11	6	8	10	2	8	9	9	10	8	12	10	12	10	10	10	12	11	10	11	12	9	5	20	104	6	5	6	12	14	14	14	1	1	13	13	13	12	13	126	11	10	12	10	11	11	11	11	11	10	3	11	11	11	11	11	10	11	11	11	11	11	11	11	11	10	9	11	6	9	10	11	7	9	11	9	8	8	9	11	11	11	10	10	10	10	3	8	1	1	1	10	2	27	1	10	10	11	10	11	12	3	11	11	3	9	11	N	11	11	8	11	11	12	11	8	1	10	11	11	10	2	2	2	2	11	11	2	2	2	1	3	11	10	11	10	11	3	10	11	11	10	10	10	11	8	10	11	11	11	2	10	9	10	10	11	3	10	9	10	10	10	10	3	10	9	10	10	10	11	3	2	9	10	10	9	10	10	1	1	1	6	5	3	11	11	1	1	1	1	9	9	10	10	8	2	N	10	9	9	10	9	11	9	9	9	10	10	10	11	11	N	3	11	11	11	10	11	11	11	10	10	8	9	11	3	10	8	10	10	11	10	10	5	10	9	10	10	11	10	56	11	1	10	36	25	10	9	11	12	10	1	1	1	11	1	1	1	1	1	28	11	1	9	9	9	5	1	10	10	9	10	6	9	9	9	10	10	9	10	10	11	10	10	10	10	1	10	10	6	10	3	10	1	10	10	10	10	11	10	11	10	11	10	8	10	1	28	1	1	10	10	9	11	6	8	7	4	10	1	1	10	1	9	3	5	9	10	10	8	10	10	10	10	8	1	6	212-	10	7	10	10	10	10	10	10	10	10	10	10	10	9	10	9	10	10	10	10	10	10	10	10	3	8	10	9	10	10	9	11	9	4	6	10	10	10	10	10	10	10	10	10	10	9	9	4	9	10	10	10	11	11	11	46	8	10	10	8	11	10	4	10	8	10	10	10	8	9	9	9	9	10	10	8	9	7	3	2	10	10	1	9	9	10	1	1	10	6	10	2	10	1	10	10	3	10	10	10	8	10	1	10	7	11	11	10	4	1	10	10	10	10	10	11	9	3	10	12	26	10	11	11	10	10	8	11	11	12	11	11	11	11	9	11	10	10	10	10	10	10	10	10	10	1	41	1	10	10	4	10	1	1	11	9	9	10	2	4	4	8	10	9	11	8	9	10	1	1	10	6	60	1	9	3	1	1	10	9	9	10	9	10-	10	10	11	10	10	59	10	10	1	10	3	10	68	10	10	10	11	10	4	3	6	10	4	3	1	8	4	1	8	9	10	11	10	10	9	8	10	1	9	7	10	9	9	10	11	10	10	6	3	74	10	11	11	10	2	10	10	10	7	10	11	1	1	1	10	10	1	10	10	11	10	1	2	2	10	10	10	8	10	9	10	11	9	10	11	4	1	5	10	9	10	11	10	10	11	10	10	11	10	10	10	4	4	4	4	6	4	6	6	11	10	10	10	10	10	11	11	10	9	6	10	10	9	7	10	11-	8	10	10	5	10	4	11	10	11	10	2	11	27	9	10	11	10	11	9	10	11	10	12	10	12	8	10	10	10	10	10	10	10	9	10	10	9	9	1	3	4	9	6	6	6	6	11	9	9	9	10	7	10	5	9	10	10	12	11	10	10	11	9	11	11	11	11	11	10	10	10	6	5	8	10	11	6	9	10	10	38	9	9	5	10	11	2	9	10	10	10	10	10	10	10	10	10	11	2	10	62	9	1	9	1	10	10	6	6	10	9	10	10	3	10	10	2	9	11	9	9	10	10	10	10	10	10	2	8	7	7	1	10	10	10	10	10	10	10	8	11	9	10	9	8	8	8	10	2	7	1	7	10	10	1	7	10	10	10	10	10	10	8	10	10	11	10	10	4	10	2	8	11	11	9	10	89+	9	9	10	6	9	10	10	10	10	11	10	10	10	10	10	10	10	3	11	11	11	10	10	10	11	10	10	10	10	6	10	11	9	10	10	10	2	10	10	9	10	10	10	10	52	10	10	10	10	6	3	5-	7	10	11	10	9	1	10	10	9	10	11	8	36+	9	11	10	10	9	11	9	10	73	9	10	10	10	9	10	11	28	10	10	10	11	11	10	1	11	10	6	9	9	10	10	10	9	10	10	9	10	10	10	10	1	5	10	10	10	11	11	9	10	11	10	9	10	10	10	11	10	4	9	7	4	10	9	1	9	9	7	10	9	9	10	10	10	8	10	7	2	9	10	10	11	9	7	10	10	9	9	6	1	10	10	10	9	1	11	10	11	10	11	12	6	10	8	11	7	8	2	11	10	6	11	9	7	11	10	11	11	10	10	11	11	7	10	7	11	3	3	9	10	11	12	45	11	11	10	10	11	3	11	11	11	11	11	5	5	10	11	10	11	5	11	11	1	11	10	11	11	36	11	2	8	11	4	2	10	11	2	10	9	1	11	8	97	11	10	9	8	11	52	11	11	11	2	28	22	11	10	9	11	10	11	11	10	12	3	58	10	10	10	3	3	10	6	9	7	9	11	3	7	10	10	9	9	6	9	9	10	11	11	11	10	10	9	11	11	11	11	11	11	11	11	11	11	11	11	11	10	11	11	11	9	10	11	9	10	27	10	2	2	11	10	11	10	10	0?	0?	0?	0?	0?	0?	0?	0?	0?	0?	0?	0?	0?	0?	0?	0?	0?	0?	0?	0?	0?	0?	0?	0?	0?	68-	0?	0?	0?	0?	105	9	10	10	10	10	11	9	9	10	10	10	10	10	10	10	72	10	36	10	11	11	9	44	10	6	10	10	10	11	10	10	10	10	10	10	10	10	10	6	11	10	9	9	9	9	10	10	46	10	10	10	9	10	1	10	10	10	10	8	11	2	10	10	11	10	9	10	10	10	10	10	10	2	10	5	10	10	2	2	10	5	9	3	2	4	5	10	10	1	10	10	10	10	10	1	9	11	11	8	6	10	2	10	10	10	11	11	7	9	8	6-	8	10	9	10	9	9	3	10	10	10	49	1	9	10	10	10	9	9	4	10	10	6	1	61	10	7	10	7	11	2	12	10	10	10	9	11	11	10	1	38	10	9	8	1	10	8	10	10	10	10	11	11	10	10	8	10	10	10	10	11	9	10	10	10	10	7	11	9	10	9	7	3	8	2	9	10	10+	8	8	2	1	10	9	7	9	10	10	10	8	9	10	9	11	10	10	10	10	10	11	10	10	10	7	10	9	48	10	4	2	9	5	10	10	10	1	10	7	10	10	8	10	11	11	10	9	10	10	9	10	9	73	11	10	N	9	10	10	5	10	10	10	12	11	10	9	11	19	8	9	1	2	1	1	1	9	9	10	10	10	10	10	10	7	11	10	1	10	10	10	7	10	10	3	10	11	10	0?	0?	0?	0?	0?	0?	0?	0?	0?	0?	N	10	9	11	10	10	28	10	10	1	5	11	11	10	10	10	9	9	9	8	8	9	1	1	10	2	5	8	8	1	1	1	1	1	1	1	1	10	1	10	1	1	1	1	1	1	6	10	10	10	2	11	10	10	9	N	10	10	10	10	10	10	9	8	10	2	1	9	10	10	9	10	7	1	10	11	9	9	10	11	3	10	10	10	10	10-	10	10	6	11	9	5	9	10	10	11	11	11	9	10	59	46	9	19	3	19	25	22	49	19	20	22	52	18	49	64	22	56	10	10	10	10	10	11	11	10	11	4	9	10	2	11	9	8	9	9	8	8	9	10	8	10	6	9	8	9	62	11	10	11	11	38	11	11	11	10	9	9	8	6	10	9	10	10	10	9	41	8	10	10	10	9	9	9	10	9	10	11	9-	10	8	N	10	5	10	10	9	10	10	10	9	11	N	10	10	10	9	10	9	10	1	8	8	3	9	10	10	10	1	10	9	8	10	10	10	10	11	10	10	3	10	9	10	10	10	10	7	5	5	9	5	4	5	9	9	8	4	10	10	10	25	9	1	11	9	11	9	1	10	10	9	1	9	10	8	9	9	7	51	10	9	10	10	10	10	47	9	10	10	10	11	11	10	10	10	10	10	2	10	10	10	10	10	8	10	10	N	10	10	10	7	8	11	2	10	11	9	10	12	10	12	9	1	10	10	10	0?	10	1	10	24	9	7	10	9	1	5	1	10	11	8	9	10	7	10	9	10	9	9	10	8	9	9	9	5	10	1	3	7	7	10	9	1	10	1	10	9	10	10	9	1	9	9	8	2	1	1	3	10	11	10	57	10	9	4	8	9	9	12	9	9	10	9	10	9	10	9	10	5	9	8	9	10	10	26	10	11	28	10	11	1	55	2	2	11	2	11	11	11	11	11	11	10	64	3	9	9	9	5	9	9	6	4	10	1	10	10	10	10	5	3	4	9	10	11	10	6	5	74-	9	8	9	10	10	9	11	1	1	1	10	10	8	10	9	4	7	9	2	7	8	10	9	4	9	10	10	10	11	9	10	10	10	10	11	10	9	9	9	6	9	9	8	1	10	9	10	9	11	10	9	9	9	10	0?	10	10	8	9	11	36-	9	9	9	9	1	10	10	10	10	9	10	8	5	10	1	3	10	6	8	11-	10	10	10	10	10	8	10	9	10	11	10	1	3	9	6	5	9	9	8	9	9	8	10	10	11	10	24	9	10	9	9	1	9	10	8	9	4	8	10	9	1	8	N	9	8	10	4	10	11	1	1	4	1	1	1	9	6	1	1	1	4	3	2	1	1	1	1	1	1	1	1	1	3	1	2	1	1	9	11	10	9	10	10	11	10	3	10	9	11	7	6	10	7	7	5	9	3	9	11	8	9	9	9	9	6	9	9	9	8	10	10	8	10	9	10	9	10	9	10	9	9	7	2	9	3	9	9	10	10	10	10	10	10	4	9	9	4	4	4	10	10	3	8	4	1	8	12	10	10	5	11	9	4	1	14	7	1	9	10	5	9	11	11	10	5	9	4	11	10	12	12	4	12	12	12	12	1	9	10	7	10	6	6	5	6	6	6	6	6	6	6	6	11	6	6	6	6	6	6	6	6	11	11	11	10	9	12	11	10	11	11	11+	11	11	11	11	11	11	11-	11	10	10	10	10	10	11	10	9	10	10	11	9	10	10	10	11	11	10	8	10	11	37	2	10	11	10	10	10	11	11	3	10	11	11	10	11	10	9	10	9	7	11	11	11	11	9	6	5	11	4	10	10	6	11	11	10	10	9	11	12	11	9	1	11	9	10	12	11	10	11	10	11	10	11	11	11	11	12	11	74	11	11	11	11	10	10	6	3	11	11	69	3	5	10	11	11	10	11	11	11	11	10	9	10	11	11	11	11	10	9	11	11	10	11	10	9	3	5	9	11	10	11	9	2	10	5	11	8	1	12	11	11	11	11	10	10	10	10	1	11	11	10	11	11	10	10	10	10	9	9+	2	9	9	11	11	11	5	11	11	11	11	5	0	0
GCA_000516095.2_gabuh99pb_v01_genomic.fna	4	6	6	6	6	1	2	1	6	6	2	6	3	3	6	6	6	6	12	6	1	5	6+	6	3	6	6	5	5	6	2	5	6	6	5	5	6	6	6	6	5	6	6	6	6	6	6	6	3	6	6	6	5	6	12	14	14	14	1	1	13	13	13	12	13	6	6	6	6	6	6	6	6	6	6	6	6	75	6	6	6	6	6	6	6	6	6	6	6	6	6	6	5	6	5	6	6	6	6	5	6	5	6	5	5	6	6	6	5	6	6	6	3	5	1	1	2	5	2	6	4	6	6	6	5	6	6	6	6	6	5	6	6	N	6	6	4	6	6	6	6	5	5	5	6	6	5	6	5	6	6	6	6	6	5	6	1	1	1	1	13	1	1	1	1	6	6	5	5	5	6	4	1	1	1	6	1	1	1	1	1	1	1	1	1	1	1	1	1	1	1	1	1	1	1	6	4	1	1	1	1	1	1	1	1	1	1	1	1	1	110	1	1	1	1	1	1	1	1	1	1	1	1	1	1	1	1	1	6	1	1	1	1	1	1	1	1	1	1	1	1	1	1	1	1	1	1	1	1	1	1	1	12	1	1	1	1	1	1	1	1	1	1	1	1	1	1	1	1	1	1	1	1	1	1	6	1	1	1	1	1	1	1	1	1	1	1	1	1	1	1	1	1	1	1	1	1	1	1	1	1	1	1	1	1	1	1	1	1	1	1	1	1	1	1	1	1	1	1	1	1	1	1	1	1	1	1	1	1	1	1	1	1	1	1	1	1	1	1	1	1	1	1	1	1	1	1	1	1	1	1	1	1	1	1	1	1	1	1	1	1	1	1	1	1	1	1	1	1	1	1	1	1	1	1	1	1	1	1	1	1	1	1	1	1	1	1	1	1	1	1	1	1	1	1	6	1	1	1	1	1	1	1	1	78	1	1	1	1	1	1	1	1	1	1	1	1	6	13	1	1	1	1	1	1	1	1	1	1	1	1	1	1	1	1	1	1	1	1	1	1	1	1	1	1	1	1	1	1	1	1	1	1	1	1	1	1	1	1	1	1	1	1	1	1	1	1	1	1	1	1	1	1	1	1	1	1	1	1	1	1	1	1	6	1	1	1	1	1	1	1	1	1	1	1	1	1	1	1	1	1	1	1	1	1	1	1	1	1	1	1	1	70	1	1	1	1	1	1	1	1	1	1	1	1	1	1	1	6	1	1	1	1	1	1	1	1	1	1	3	1	1	1	1	1	1	1	1	1	1	1	1	1	1	1	1	1	1	1	1	1	1	1	1	1	1	1	1	1	1	1	1	1	1	1	1	1	1	1	6	1	1	1	1	1	1	1	1	6	1	1	1	6	1	1	1	1	1	1	1	1	1	1	1	1	1	1	1	1	1	1	1	1	1	1	1	1	1	1	1	1	1	1	1	1	1	1	1	1	1	1	1	1	1	1	1	1	1	1	1	1	1	1	1	1	1	6	1	1	1	12	11	11	12	10	12	13	13	11	12	11	11	11	13	13	1	1	1	1	1	1	1	1	1	1	1	1	1	1	1	1	1	1	1	1	1	1	1	1	1	1	1	1	1	1	1	6	1	6	1	1	1	1	1	1	1	1	1	1	1	1	1	1	1	1	1	1	1	1	1	1	1	1	1	1	1	1	1	1	1	1	1	1	1	1	1	1	1	1	1	1	1	1	1	1	1	1	1	1	6	1	1	1	1	1	1	1	1	1	1	1	1	1	1	1	1	1	1	1	1	1	1	1	1	1	1	1	1	1	1	1	1	1	1	1	1	1	1	1	1	1	1	6	1	1	1	1	1	1	1	1	1	1	1	1	1	1	1	1	1	1	1	1	1	6	1	1	1	1	1	1	1	1	1	1	1	1	63-	1	N	1	1	1	1	1	1	1	1	1	1	1	1	1	1	1	1	1	1	1	1	1	1	1	1	1	1	1	1	1	1	1	1	1	1	1	1	1	1	1	1	1	6	1	1	1	1	1	1	1	1	1	1	6	1	1	1	1	1	1	1	1	1	1	1	1	1	1	1	1	1	1	1	1	1	1	1	1	1	1	1	1	1	1	1	1	1	1	1	1	1	1	1	1	1	1	1	1	1	1	1	1	1	1	1	1	1	1	1	1	1	1	1	1	1	1	70	1	1	1	1	1	1	1	1	1	1	1	1	1	1	1	6	1	1	1	1	1	1	1	1	1	1	1	6	1	1	1	1	1	1	1	1	1	1	1	1	1	1	1	1	1	1	1	1	1	1	1	1	1	1	1	1	1	1	1	1	1	1	1	1	1	1	1	1	1	1	1	1	1	1	1	1	1	1	1	1	1	1	1	1	1	1	1	1	1	1	1	1	1	1	1	1	1	1	1	1	6	1	1	1	1	1	1	1	1	1	1	1	1	1	1	1	1	1	1	1	1	1	1	1	1	1	1	1	1	5	1	1	1	1	1	1	1	1	1	1	1	67	1	1	1	1	8	1	1	1	1	1	1	1	1	1	1	1	1	1	6	1	1	1	1	1	1	1	1	1	1	1	1	1	1	1	1	1	1	1	1	1	1	1	1	1	1	1	1	1	1	1	1	1	1	1	1	1	1	1	1	1	1	1	1	1	1	1	1	1	1	1	1	1	1	1	1	1	1	6	438+	6	1	1	1	1	1	1	1	1	1	1	1	1	1	1	1	1	1	1	1	1	1	1	1	1	1	1	1	1	1	1	1	1	1	1	1	1	1	1	1	1	1	1	1	1	1	1	1	1	1	1	1	1	1	6	1	1	1	1	1	1	1	1	1	1	1	1	1	12	1	1	1	1	1	1	1	1	1	1	1	1	1	1	1	1	1	1	1	1	1	1	1	1	1	1	1	1	6	1	1	1	1	1	1	1	1	1	1	1	1	1	1	1	1	1	1	1	1	1	1	1	1	1	1	1	1	1	1	1	1	6	1	1	1	1	1	1	1	0?	0?	1	1	1	1	1	1	1	1	1	1	1	1	1	1	1	1	1	1	1	1	1	1	1	1	1	1	1	1	1	1	1	1	1	1	1	6	1	1	1	1	6	1	97	1	1	1	1	1	1	1	1	1	1	1	1	6	1	1	1	1	1	1	1	1	6	1	1	1	1	1	1	1	1	1	1	1	1	1	1	1	1	1	1	1	1	1	1	1	1	1	1	1	1	1	1	1	1	6	1	1	1	1	1	6	1	1	1	1	1	1	1	1	1	1	1	1	1	1	1	1	1	1	1	1	1	1	1	1	1	1	1	1	1	1	1	6	1	1	1	1	1	1	1	1	1	1	1	1	58	1	6	1	1	1	1	1	1	1	1	1	1	1	1	1	1	1	1	1	1	1	1	1	1	1	1	1	1	1	1	1	1	1	1	1	1	1+	1	1	1	1	1	1	1	1	6	1	1	1	1	1	1	1	1	1	1	1	1	1	1	1	1	1	1	1	1	1	1	1	1	1	1	1	1	1	1	1	1	1	1	1	1	1	1	1	1	1	1	1	6	1	1	1	6	1	1	1	1	1	1	1	1	1	1	1	1	1	1	1	1	1	1	1	1	1	N	1	1	1	1	1	6	5	5	5	6	5	5	5	5	5	6	5	4	5	5	1	6	6	1	1	6	6	5	5	5	1	1	1	1	1	1	1	1	1	1	1	1	1	1	1	1	1	1	1	1	1	1	1	1	1	1	1	1	1	1	1	1	1	1	1	1	1	1	1	1	1	1+	1	1	1	6	1	1	1	1	1	1	1	1	1	1	1	1	5	1	1	1	1	1	1	1	1	1	1	1	1	1	1	1	N	1	1	1	1	1	1	1	1	1	1	1	1	1	1	1	1	1	1	1	1	1	1	1	1	1	1	1	1	1	1	1	1	1	1	1	1	1	6	1	1	1	1	1	1	1	1	1	1	1	1	1	1	1	1	1	1	1	1	1	1	1	1	1	1	6	1	1	1	1	1	1	1	1	1	1	1	1	1	1	1	1	1	1	1	1	1	1	1	1	1	1	6	1	1	1	1	1	1	1	1	1	1	1	1	1	51	1	6	1	1	1	1	1	1	1	1	1	1	1	6	1	1	1	1	1	1	1	1	1	1	1	1	1	1	12	1	1	1	1	1	6	1	1	1	1	1	1	1	1	1	1	1	1	1	1	1	1	1	1	1	1	1	1	1	1	1	1	1	1	1	1	1	1	1	1	1	1	1	1	1	1	1	1	1	1	1	1	1	1	6	1	1	1	1	1	1	1	1	1	1	1	1	1	1	1	1	1	1	1	1	1	1	1	1	1	1	1	1	1	1	1	1	1	1	1	1	1	1	1	1	1	1	1	1	1	1	1	1	1	1	1	1	15	1	1	13	1	1	1	1	1	1	1	1	1	1	1	1	1	1	1	1	1	1	1	1	1	1	1	1	1	6	1	1	1	1	1	1	1	1	1	1	1	1	1	1	1	1	1	1	1	1	1	1	1	1	1	1	6	1	1	1	1	1	1	1	1	4	1	1	1	1	1	1	1	1	1	1	1	1	1	1	1	1	1	1	1	1	1	1	6	1	1	1	1	1	1	1	1	1	1	1	1	1	1	1	1	1	1	1	1	1	1	1	1	1	1	1	1	1	1	1	1	1	1	1	1	1	1	1	1	1	1	1	1	1	1	1	1	12	1	1	3	1	1	1	1	1	1	1	1	3	1	1	1	1	1	1	1	1	1	1	1	1	1	1	1	1	1	1	1	1	1	1	1	1	1	1	1	1	1	1	1	1	1	1	1	1	1	1	1	1	1	1	1	1	1	1	1	1	1	1	1	1	1	1	1	1	1	1	1	1	1	3	1	1	1	1	1	1	1	1	1	1	1	1	1	1	1	1	6	1	1	1	1	1	1	6	6	6	6	6	6	9	2	6	1	2	5	1	1	1	6	6	6	3	6	6	6	6	6	6	6	6	6	6	14	1	5	6	1	6	6	6	5	6	6	6	6	6	6	6	6	6	6	6	6	6	6	6	6	6	6	6	6	6	6	6	6	6	6	6	6	6	6	6	6	6	6	6	6	3	3	3	3	3	3	3	3	3	3	6	3	3	3	3	6	3	6	6	12	6	6	4	6	6	6	6	6	6	6	5	5	6	6	6	13	6	6	6	5	1	6	6	6	6	3	5	6	6	6	6	6	4	6	6	6	4	5	6	6	6	5	3	6	5	6	6	6	6	6	6	6	27	6	6	6	6	6	6	6	6	6	6	160+	6	6	2	1	6	6	6	3	3	6	6	6	6	6	6	6	5	5	5	5	13	6	6	6	6	6	6	6	6	6	5	5	5	4	6	6	5	6	5	2	5	6	6	6	2	6	6	6	6	6	6	6	6	6	3	6	13	6	6	6	6	6	6	6	6	6	4	5	5	6	6	5	5	6	6	6	13	6+	0	0
GCA_000522525.1_AB-MDR-MMC4_genomic.fna	2	307	11	149	11	1	1	1	12	12	1	11	2	10	12	11	12	12	11	12	10	8	12+	189	6	19	19	10	16	17	2	13	16	N	6	8	284	17	19	16	14	17	20	20	19	19	22	9	5	5	12	12	11	5	11	12	12	12	N	25	21-	N	10	10	21	27	24	27	26	20	22	22	23	16	17	16	16	19	13	13	18	18	8	242	19	13	14	14	15	14	18	16	13	8	13	12	15	18	5	13	15	14	12-	11	13	17	16	N	17	15	16	13	3	5	1	1	1	1	1	138	1	1	1	1	1	1	1	1	1	1	1	1	1	10	15	1	1	1	1	1	1	1	1	1	1	1	2	1	1	1	205	21	1	1-	1	1	1	1	1	1	13	1	1	1	1	6	6	5	5	5	6-	4	1	1	1	1	1	1	1	1	1	1	1	1	1	1	1	1	1	1	1	1	1	1	1	6	1	1	N	1	1	1	1	1	1	1	1	1	1	1	N	1	1	1	1	1	1	20	1	1	1	1	1	1	1	1	1	1	6	1	1	1	1	1	1	1	1	1	1	1	1	1	1	1	1	1	1	1	1-	N	1	1	1	1	1	1	1	1	1	1	1	1	1	1	1	1	1-	1	1	1	1	1	1	1	1	6	1	1	1	1	1	1	1	1	1	1	1	1	1	1	1	1	1	1	1	1	1	15	1	1	1	38-	1	1	1	1	1	1	1	N	1	1	1	1	1	1	1	1	1	1	1	1	1	1	1	1	1	1	1	1	13	1	1	1	1	1	1	1	188-	1	1	1	1	44	1	1	1	1	113	1	1	1	1	N	1	1	1	1	1	1	1	1	1	10	1	1	N	1	1	1	1	1	1	1	1-	1	1	1	1	1	1	1	1	1	1	1	1	1	1	1	1	1	1	1	1	6	1	1	1	1	1	1	1	17	1	1	1	1	1	1	1	1	1	1	1	1	1	6	13	1	1	1	1	1	1	1	1	1	1	1	1	1	1	1	1	1	1	1	1	1	1	1	1	1	N	1	1	1	1	1	1	1	1	1	1	1	1	1	1	1	1	1	1	1	1	1	1	1	1	1	1	1	1	1	1	1	1	1	1	1	1	1	1	6	1	1	1	1	1	1	1	1	1	1	N	1	1	1	1	1	1-	1	1	1	1	1	1	1	15	1	1	1	1	1	1	1	1	1	1	1	1	1	1	1	1	1	1	1	1	1	1	1	1	1	N	1	N	1	1	3	1	1	1-	1	1	1	1	1	1	1	1	1	1	1	125	1	1	1	1	1	1	N	1	1	1	1	148	1	1	1	1	1	1	1	1	1	1	1	1	6	1	N	1	1	1	1	1	1	6	1	1	1	142	1	1	1	1	1	1	1	16	1	1	1	1	1	1	1	1	1	1	1	1	1	1	1	1	1-	1	1	1	N	1	1	N	1	1	1	1	1	1	1	1	1	1	1	1	1	1	1	1	1	1	1-	1	219	6	1	1	N	N	11	11	12	10	12	13	13	11	12	11	11	116	13	13	1	1	1	1	1	1	1	1	1	1	1	1	1	1	1	1	1	1	1	1	1	N	1	1	1	1	1	1	1	1	1	6	1	N	1	1	N	1	1	1	1	1	1	1	1	1	164	1	1	1	N	1	1	N	1-	1	1	1	1	N	1	1	1	1	1	1	1	1	N	1	1	1	1	1	1	1	1-	1	1	1	1	1	1	1	6	1	1	1	1-	1	1	1	1	1	N	1	1	1	1	1	1	1	1	1	1	1	1	1	16-	1	1	1	1	1	1	1	1	1	1	1	1	1	1	1	1	1	1	6	1	1	1	1	1	1	1	1	1	1	1	1	1	1-	1	1	1	1	1	1	1	282	1	1	1	1	1	1	1-	1	1	1	1	1-	1	1	1	1-	1	1-	1	1	1	1	1	1	1	1	1	1	1	1	1	1	N	1-	1-	1	1-	1	1	1	1	1	1	1-	1	1	N	1	1	1	1	1	1	1	1-	1-	6	1	1-	1	1	1	1	1	1	1	1	6	1-	N	1	1	1	1-	1	1	1	1-	1	1	1	1	1	1	1-	1	1	1	1	1	1	1	N	1	1	N	1	1	1	1	1	1	1	1	1	1	1-	1	1	1	1	1	1	1	1	1	1	1	1	1	1	1	N	1	1	1	N	1	1	1	N	163	N	1	1	1	N	1	1	1	1-	N	1	1	1	1	6	1	1	1	1	1	1	1	1	1	1	1	1	1	1-	1	1	1	1	1-	1	1	N	1-	1	1-	N	1	1	N	1	1	1	N	1	1-	1	1	1	N	1	N	1	1	1	1	N	1	1	1	N	N	1	1	1	1-	1	1	N	1	1	1	1	1	1	1	N	1	N	1-	1	1	1	1	1	1	1	1	1	1	N	1	1	1	1	6	1	1	181	1	1	1	1	1	1	1	1	N	1	1	N	1-	1	1-	1	1	1	N	1	N	1	1	1	1	N	1	1	1	1	1	1	1	1	1	1	1	1	1-	1	1	N	8	236-	1-	1	1	1	1	1	1	1	1	1	N	1	6	1	1	N	1	1	1	1	1	1	1	1	1	1	1	1	1	1	1	1	N	1	1	1-	1	1	1	1	1	1	1	1	1	1	N	1	1	1	1	255	1	1	1	1	1	1	1	1	1	1	1	1-	1	1	1	1	1	1	1	N	438-	6	1	1	1-	1	1	1	1	1	1	1	1	1-	1	1	1	1	1	N	1	1	1	1	N	1	1	13-	16	1	N	1	1-	1	1-	N	1	N	1-	1	1	235	1	1	1	1-	N	1	1	1-	1-	1-	1	1	1	6	1	1	N	N	1	1	1	1	1	1	1	1	1	N	1	1-	1	1	1-	1	1	1	1	1	1-	1	1	N	1	N	1	N	1	1	1	1	1	1	1	1	1	1	6	1	N	1	1	N	1	N	1-	1	1-	1	N	1-	1	1-	1	N	N	1	1-	1	1	1	1	1	83	145	1	171	1	1	1	1	N	1	1	439-	1	1	1-	1	1	1	N	1	1	1	1	1	1	1	1-	1	1	N	N	1	1	1	1	104-	1	1	1	1	1	1	N	1	1	1	1	1	1	1	1	1	6-	1	1	N	1	1-	1	1	1	1	1	1	1	1	N	1	N	1	1	1-	6	1	1	1-	1	1	1	N	1	6	1	1-	1-	1	1-	1	1	1	1	1	1	1	1	1	1	1	N	N	1	1-	1	1	N	1-	1	1	1	1	1	1	1	1	6	1	1	1	1	1	6	1	1	1	1	1	1	1	1	1	1	1	1	1	1-	1	1	N	1	1-	1	1	1	N	1	1	15	1-	1	1-	1	1	6-	1	1	1	1	1	1	1	1	1	1	N	N	1	1	6	1	1	1	1	1-	1	1	1	1	1	1	1	1	1	1	1-	1	1	1	1	1	1	1	1	1	1	1	1	N	N	1	1	1	1	1+	1	1	1	1	1	1	N	1	6	1	1-	1	1	1	8-	1	1	1	1	1	1	1	1	1	1	1	1	1	1	1	1	1	1	1	1	1-	1	1	1	1	1	1	1	1	1-	1	1	1	1	1	N	1	1	1	1	1	6	N	1	1	1-	1	N	1	N	15	1	1	1	1	1	1	1	1	1	1	1	1	1	1	1	1	1	1	6	5	5	N	6	5	5	5	5	5	6	5	4	5	5	1	6	6	1	1	6	6	N	5	5-	1	1	194	N	1	1	1	1	1	1	1	1	1-	1	1	1	1	1	1	1	1-	1	1	1	1	1	1	1-	1	1	14	1	1	1	1	1	1	1	1	1	1	1+	1	1	1	6	1	1	1	1	1	1	1	1	1-	1	1	1	1	1	1	1	1	1	1	1	1	1	1	1	1	1-	1	1	1	1	1	15	1	1	1	1	1	1	1	1	1	1	1	1	N	1	1	1	1	N	1	1	1	1	1	1	1	1	1	1	1	1	1	1	1	1	6	1	1	1	1	1	1	15-	160	1-	1	1	1	1	1	1	1	1	1	1	1	1	1	1	1	1	1	6	1	1	1	1	1	1	1	1	1	1	1	1	1	1	1	1	1	1	N	1	1	1	1	1	1	1	6	1	1	1	1	1	1	1	1-	1	1	1	1	209-	1	16	6	1	1	N	1	1	1	1	1	1	1	1-	1	1	N	1	1	1	1	1	1	1	1	1	1	1	N	1	1	1	1	1	1	6	1	1	1	1	1	1	1	1	1	1	1	1	1	1	1	1	1	1	11	1	N	1	1	1	1	1	1	1	1	1	1	1-	1	1	1	1	1	1	1	N	1	1	1	1	1	1	1	1	6	1	N	1	1	1	1	1	1	1	1	1	1	1	1	1	1	N	17	15	14	15	4	17	1	1	1	1	1	1	1	1	1	1	1	1	45	1	1	1-	1	1	1	1	1	1	1	1	115	N	1	1	1	1	1	1	1	1	1	1	1	1	1-	1	1	16	1	1	1	1	1	1	1	1	19	1	1	1	1	1	1	1	6	1	1	1	1	1	1	1	1	1-	1	1	1	1	1	1-	1	1	1	1	1	1	1	1	1	1	1	6	1	37	4	7	220	0?	69	93	N	9	103	1	1	N	1	1	1	1	1	1	1	1	1	1	1	1	1	1	1	1	1	1-	1	1	1	1	1	1	1	1	1	1	1	1	1	1	1	1	1	1	1	1	1	1	1	1	1	1	1	1	1	1	1	1-	1	1	1	1	1	1	1	1	1	N	1	1-	1	1	1	99-	1	1	1	3	1	1	1	1	1	1	1	1	3	1	1	1	1	1	1	1	1	1	1	1	1	1	1	1	1	1	187	1	1	1	1	1	1	1	1	1	1	1	1	1	1	1	1	1	1	1	1	1	1	1	14	14	5	14	16	14	13	15	15-	11	14	14	N	14	18	14	16	N	13	2	3	10	14	10	10	16	15	15	15	15	15	12	13	14	6	13	N	166	18	1	N	4	1	56	12	10	10	5	11	9	4	1	14	7	1	9	14	11	14	20	6	6	3	6	6	6	6	6	6	6	6	6	6	14	1	5	6	1	6	6	6	5	6	N	6-	6	6	6	6	6	6	6	6	6	6	6	6	6	N	6	6	6	6-	6	6	6	6	6	6	16	6	17	6	6	6	6	6-	16	3	3	3	3	3	3	3	3	3	3	6	16	3	3	3	3	16	6-	6	12	6	6	4	6	6	6	6	6	6	6	5	5	6	6	6	13	6	6	6	5	1	6	6	6	6	3	5	6	6	N	6	15	9	12	12	11	11	10	12	13	17	10	1	12	10	11	13	1	11	1	11	12	2	12-	12	12	12	5	12	13	12	12	12	N	11	11	7	1	12	N	11	1	3	11	12	12	11	12	12	12	12	11	10	16	12	12	12	20	N	10-	12	12	11	12	11	10	7	8	10	12	11	12	10	2	11	7	12	9	1	13	17-	12	12	12	11	11	11	11	5	12	12	11	280	12	11	11	11	11	10	16	3	10	10	12	12	12	6	12	12	12	12	11	0	0
GCA_000580355.2_ASM58035v2_genomic.fna	6	9	4	4	4	2	1	1	9	9	1	4	4	16	9	8	9	9	9	9	5	7	9	14	1	9	9	2	3	9	2	3	4	4	6	6	10	1	10	7	6	7	10	10	7	9	10	7	2	10	10	10	9	7	7	10	10	10	1	10	9	9	6	7	284-	7	7	7	10	9	9	9	9	9	9	4	10	9	9	9	9	9	9	9	9	9	9	9	9	9	9	9	8	9	8	4	9	9	9	8	9	8	3	7	8	9	9	9	8	4	4	4	3	3	1	1	3	8	2	9	1	8	1	9	8	9	10	3	9	9	3	8	9	4-	9	9	7	9	9	10	9	2	8	8	9	9	8	9	7	9	9	9	9	9	8	4	1	3	13	12	27	13	14	1	13	14	14	23	18	13	14	14	13	14	14	14	1	13	12	13	12	14	4	13	3	13	13	13	13	10	13	17	13	13	13	14	8	7	11	13	22	12	13	13	1	1	1	1	1	1	38	26	1	4	2	12	12	4	6	13	11	8	54-	22	12	7	8	7	9	8	4	8	8	8	8	9	9	9	1	9	9	9	8	14	9	9	12	8	6	7	9	7	8	6	8	8	9	28	8	8	8	4	8	8	9	8	8	9	1	8	8	9	8	8	31	10	8	9	3	7	9	7	4	8	7	8	8	9	2	4	4	4	4	7	8	4	4	6	1	4	4	12	13	8	4	8	8	9	8	4	8	8	1	8	20	7	8	2	8	1	8	8	8	8	9	8	N	8	9	8	4	8	1	8	N	5	8	8	7	9	7	7	6	2	21	1	1	8	8	7	23	4	8	8	8	3	8	8	8	24	5	1	N	6	8	6	8	8	20	17	16	13	13	19	13	13	13	12	18	12	13	13	13	13	13	13	13	11	3	10	12	11	16	13	12	10	20	5	5	13	13	7	12	13	13	13	16	12	13	12	18	9	12	8	8	8	9	9	9	8	7	13	8	7	9	8	1	8	6	8	8	8	4	4	4	4	4	8	8	2	2	2	1	8	8	8	1	4	4	13	1	1	8	8	8	5	8	1	8	8	7	8	8	13	6	8	7	8	6	9	9	8	4	1	8	8	8	8	8	9	5	6	6	10	6	8	9	9	6	8	6	9	9	10	9	9	9	9	7	9	8	8	8	8	8	8	8	8	8	1	8	3	8	14	6	8	2	1	9	7	7	8	8	4	8	6	8	6	9	7	7	8	8	1	8	1	8	8	7	5	8	8	8	8	8	8	7	8	8	8	9	8	13	8	8	8	9	13	3	8	8	8	8	8	9	8	8	3	3	4	4	1	1	4	4	3	3	4	8	14	8	8	7	7	1	6	4	3	4	4	4	8	9	8	8	6	3	8	8	9	9	8	8	8	8	8	4	8	9	3	1	8	8	8	8	8	13	9	8	6	2	1	8	8	8	6	8	7	8	9	7	8	9	8	1	6	8	12	8	9	8	8	9	8	8	9	6	8	8	8	8	8	13	14	12	9	9	N	8	8	8	8	8	9	9	8	7	5	8	8	8	1	13	13	6	8	8	7	8	8	9	8	9	8	7	9	7	7	8	9	8	9	6	22	9	8	10	8	10	8	8	8	8	8	8	8	6	4	8	8	7	4	1	3	8	6	4	8	6	N	9	8	8	4	8	2	8	6	3	8	8	10	9	13	8	9	8	9	9	9	9	24	8	24	8	8	4	4	8	9	5	7	8	8	8	7	7	3	8	9	8	151-	8	8	8	8	8	8	8	8	0?	1	4	8	4	4	4	4	1	8	8	N	8	8	7	26	8	5	8	8	12	7	9	7	7	8	8	8	8	8-	8	3	6	8	5	9	34	13	8	8	8	8	8	6	14	4	8	7	3	3	3	8	2	2	6	4	8	8	6	5	8	8	8	8	8	8	2	8	8	14	8	8	7	8	2	5	9	9	7	8	4	7	7-	8	4	4	12	8	8	8	9	8	8	8	8	8	8	8	12	9	9	9	8	8	13	9	8	8	8	13	8	8	9	7	8	8	8	7	8	8	8	8	8	22	8	8	8	8	8	8	3	3	8	2	8	9	8	7	5	8	8	7	8	9	4	3	12	9	8	8	4	9	8	8	7	7	8	8	8	8	8	9	8	8	8	8	9	9	8	7	9	8	1	7	7	8	8	8	8	8	19	7	8	8	13	8	1	6	8	8	8	9	13	3	13	9	8	7	8	13	8	9	8	2	11	6	8	8	7	1	7	5	8	8-	7	8	8	8	8	6	8	6	5	8	8	8	9	7	4	8	8	8	8	7	8	13	8	13	4	1	9	3	14	3	14	13	8	11	9	13	9	18	2	14	13	11	14	9	3	14	17	14	14	10	13	14	13	3	13	13	16	12	6	17	13	11	15	4	14	21	8	9	9	4	9	9	9	9	6	8	6	6	9	8	9	7	9	9	1	9	2	9	9	1	9	2	8	9	3	5	8	9	1	8	11	1	14	2	9	14	9	8	8	9	9	9	9	9	13	12	1	13	6+	12	14	13	14	N	12	15	12	16	12	12	13	3	3	13	2	10	2	16	18	8	2	13	13	12	12	3	11	11	14	22	14	9	8	13	12	14	9	9	9	9	9	9	9	9	9	9	9	14	9	9	9	9	8	29	9	5	3	3	8	2	3	9	8	9	8	8	8	8	7	8	8	8	8	8	13	8	3	9	7	9	8	8	8	8	7	8	13	8	8	8	8	1	7	13	4	4	9	7	8	8	8	8	9	7	8	8	8	8	8	8	8	8	8	8	13	8	9	9	8	8	8	8	8	8	13	9	8	8	8	8	8	8	8	8	8	3	9	8	6	7	7	7	8	8	8	8	12	8	7	8	5	13	8	8	8	6	7	4	6	6	7	6	11	6	6	6	6	13	6	5	6	2	6	6	3	3	2	3	3	3	2	1	5	6	6	1	6	7	6	6	6	1	6	7	7	4	4	6	1	6	6	6	7	7	6	6	6	2	6	6	5	6	5	4	3	6	6	13	13	5	6	6	6	6	12	7	2	8	8	8	3	8	8	10	8	8	9	3	10	8	8	13	11	9	9	8	5	7	8	4	4	1	8	2	8	8	8	8	9	9	8	8	7	8	8	8	8	9	1	13	8	8	8	8	14	4	8	4	4	3	7	3	7	8	8	1	7	5	1	12	7	6	7	8	8	12	7	8	9	7	9	8	8	17	8	13	9	8	8	8	4	8	7	3	13	8	2	7	4	8	8	8	1	8	10	8	8	6	8	9	9	8	12	8	8	7	8	4	9	9	8	3	4	8	8	7	8	13	8	8	14	8	4	9	1	4	4	4	2	1	1	1	4	4	9	8	8	8	8	8	5	9	8	1	8	8	8	12	8	8	2	N	9	8	8	13	8	8	7	6	6	7	9	13	6	8	7	9	8	8	8	8	8	1	1	9	9	8	13	13	4	4	4	4	1	4	1	1	8	1	1	4	7	2	8	4	6	4	8	2	8	8	8	13	1	8	8	7	12	12	4	9	8	8	8	9	13	4	4	4	8	8	8	8	8	8	7	4	8	8	1	7	8	8	7	8	9	4	8	9	4	4	8	9	8	8	13	5	8	8	8	8	8	9	7	1	1	8	8	N	9	9	4	4	9	8	5	11	6	8	8	8	4	12	8	8	8	8	13	9	8	8+	8	8	8	8	8	9	9	8	9	3	8	13	1	9	1	7	4	4	4	4	4	8	6	8	8	4	4	4	3	9	4	4	9	9	9	9	9	8	4	4	4	8	8	7	8	8	8	8	8	7	8	8	8	12	7	6	4	4	8	9	4	4	4	9	8	8	8	8	4	8	8	8	12	9	8	8	8	8	8	8	6	8	1	6	6	8	8	8	8	8	5	13	11	11	21	1	1	1	6	1	1	1	1	1	1	1	1	1	1	13	25	12	12	11	12	12	12	3	1	N	13	13	13	23	6	14	10	28	11	5	13	12	12	11	11	8	3	3	7	2	8	8-	7	8	8	13	13	12	12	8	8	8	9	9	8	8	26	8	8	1	8	8	8	8	8	4	8	8	9	8	8	29	5	6	13	4	8	9	7	8	10	8	10	7	1	8	8	8	0?	8	8	8	8	7	1	8	1	1	1	8	8	9	7	7	8	6	8	4	8	4	4	8	4	4	4	4	4	8	1	2	2	3	8	8	1	8	4	8	7	8	8	1	8	4	4	3	7	5	2	1	8	9	8	9	4	4	4	4	4	4	10	4	4	8	4	8	7	13	7	8	4	4	4	12	8	8	8	8	9	6	6	9	3	9	9	9	9	1	9	9	9	9	24	9	8	8	6	12	4	4	7	11	8	4	3	8	1	4	8	29	8	5	3	4	8	8	15	8	2	5	8	7	8	7	13	13	11	13	10	10	11	8	8	7	8	7	1	4	4	4	4	4	4	4	3	4	8	8	8	9	8	8	8	8	8	14	8	9	8	8	8	8	8	4	8	8	7	8	7	9	8	7	4	8	19	0?	8	8	7	6	9	8	4	4	4	8	1	8	8	8	8	7	8	3	5	8	1	8	8	3	5	9	8	8	8	8	8	7	8	7	8	9	8	1	1	4	3	4	8	1	2	8	8	4	8	8	9	8	7	5	6	6	5	1	6	6	6	6	3	6	13	12	7	11	13	6	14	9	6	13	14	1	1	3	1	1	1	5	3	1	1	1	6	1	1	1	3	1	1	1	5	1	1	1	9	1	1	10	1	12	14	13	12	2	6	7-	22	8	13	4	9	1	1	8	2	1	7	8	8	8	5	7	8	8	8	8	2	8	4	8	4	8	8	3	8	8	9	8	9	8	8	8	8	6	7	8	8	8	8	13	8	8	8	8	8	8	8	8	6	8	9	9	8	1	4	3	1	4	10	12	9	9	9	4	4	1	9	6	1	4	8	4	7	37	9	4	2	7	8	9	9	10	10	1	10	10	15	16	4	11	4	3	4	4	4	7	9	4	9	9	4	9	10	9	14	9	4	9	3	9	8	9	9	9	9	9	9	8	10	9	3	9	9	9	9	9	9-	9	9	9	9	9	8	8	8	8	8	9	8	8	8	8	14	7	8	8	8	15	9	4	4	4	9	4	4	4	9	4	4	8	9	9	6	12	9	9	2	9	4	4	4	8	6	9	9	9	9	11	8	10	9	4	4	4	7	9	9	8	8	5	6	25	14	8	1	9	8	9	10	9	13	9	9	9	13	9	9	9	9	10	9	10	9	9	9	9	9	9	6	1	9	9	9	1	2	2	9	9	0?	9	9	9	9	13	12	13	9	9	9	9	8	2	9	9	8	9	8	7	6	3	6	9	8	9	2	2	12	6	9	7	1	10	9	9	9	9	9	4	9	4	1	9	9	9	9	9	4	4	4	4	4	4	3	4	8	9	9	9	6	9	9	9	9	9	0	0
GCA_000580435.2_ASM58043v2_genomic.fna	11	19	17	16	15	1	1	1	18	18	5	16	2	10	18	0?	14	14	5	32	5	9	14	15	2	14	13	7	11	12	2	9	17	10	14	14	20	1	20	18	18	18	23	22	21	20	26	14	2	5	12	23	18	17	19	24	22	21	7	22	19	36	22	20	19	23	22	24	20	18	20	20	21	17	18	3	17	26	19	18	20	29	4	18	25	22	21	25	24	19	19	17	13	17	2	8	16	20	0?	15	0?	17	13	7	12	18	18	17	3	4	4	4	3	3	1	1	1	3	3	4	9	4	14	17	4	2	16	2	17	2	2	2	2	N	6	6	4	14	14	17	17	2	2	2	2	2	2	15	3	4	4	4	4	4	4	4	1	3	13	12	21	19	14	1	13	14	14	23	18	16	14	14	13	14	14	14	1	13	12	13	12	16	4	13	3	16	2	2	16	2	2	2	2	2	2	2	1	1	1	2	1	2	2	2	1	1	1	2	2	1	26	2	2	2	2	2	2	15	15	16	11	8	54-	22	18	14	16	15	15	14	14	1	16	16	14	6	6	6	5	6	6	15	6	6	6	15	16	27	2	15	9	18	16	11	16	17	16	20	20	10	12	13	15	12	17	18	17	20	3	16	15	16	15	14	21	21	16	13	10	9	16	13	3	15	4	20	17	16	1	18	14	14	11	9	17	15	14	16	6	14	16	20	19	15	13	23	14	16	12	18	16	17	1	22	15	1	15	5	15	1	16	15	16	15	16	13	17	17	18	17	15	15	1	15	6	9	22	16	14	18	9	10	3	2	16	1	1	14	12	12	18	1	14	25	15	12	15	16	15	19	1	1	7	11	5	1	15	22	20	17	16	13	13	13	13	13	13	12	18	12	13	13	13	13	13	13	13	11	3	10	12	11	16	13	12	10	20	5	5	13	13	7	12	13	13	13	16	12	13	12	18	9	12	14	16	22	16	21	19	16	14	17	16	3	17	17	1	15	14	15	17	16	13	15	16	14	16	16	4	4	14	6	1	14	21	16	1	14	13	17	1	7	15	15	16	2	17	3	16	11	12	16	15	18	2	15	1	3	3	16	17	17	1	1	16	13	16	20	14	13	4	2	13	16	13	3	18	5	17	15	14	17	15	16	17	2	16	17	20	20	17	15	19	16	17	16	19	15	16	1	17	1	15	19	4	15	1	1	19	7	14	17	13	8	2	5	19	15	17	3	6	7	14	1	21	8	15	13	15	3	15	13	15	14	12	17	7	15	16	16	4	19	9	17	15	18	14	16	3	N	14	21	14	17	16	15	14	2	2	13	2	1	1	14	12	1	4	5	15	5	19	15	6	11	1	9	16	9	16	4	14	16	17	13	25	10	6	20	16	17	18	6	15	22	15	16	6	15	16	1	1	1	16	1	12	14	17	17	15	10	9	2	15	15	14	5	21	14	15	19	12	13	14	11	1	9	13	15	15	18	8	8	9	8	8	9	6	8	13	8	8	8	8	14	13	9	28	9	8	8	16	16	19	17	9	16	15	2	17	17	12	1	16	16	6	15	10	5	5	11	17	18	22	17	13	17	13	16	16	18	16	17	14	17	17	23	18	16	17	6	12	17	16	14	15	10	15	14	17	18	13	14	2	14	13	14	12	14	13	12	24	15	15	11	14	10	15	12	14	15	17	17	16	18	15	14	14	16	15	18	16	19	15	18	15	13	7	11	16	17	8	13	15	15	15	N	14	1	15	16	4	15	15	21	16	15	15	15	14	18	17	17	8	20	17	14	11	4	1	16	15	10	2	15	1	20	4	4	15	16	15	14	17	13	17	17	16	15	14	16	13	9	6	8	5	5	23	16	14	15	16	15	15	12	18	13	12	5	5	5	5	17	2	12	N	11	18	14	10	11	6	6	14	15	14	14	5	14	17	16	14	15	13	20	2	11	21	16	14	16	12	16	14	15	11	15	15	15	19	16	19	17	24	21	14	17	15	16	15	17	15	16	19	16	16	16	15	19	16	17	13	17	21	13	17	15	15	11	18	15	25	15	15	16	15	15	15	17	22-	15	1	7	5	7	16	18	15	18	2	16	22	15	17	23	15	10	15	16	15	15	14	18	15	15	14	267-	332-	15	17	15	16	24	15	15	16	9	16	16	25	14	17	15	1	4	12	17	16	15	13	20	14	14	18	7	16	13	6	10	14	13	13	14	14	12	3	14	13	12	13	14	12	14	12	11	12	3	12	13	11	9	16	13	13	13	7	12	15	15	15	11	15	10	12	6	18	14	17	17	11	14	17	13	10	10	21	17	14	3	3	1	4	3	19	4	12	13	8	11	9	13	9	18	2	14	13	11	14	9	3	14	17	14	14	10	13	14	13	3	13	13	16	12	6	17	13	11	15	4	14	16	14	1	20	6	2	15	16	18	18	5	13	17	16	14	15	9	17	16	1	8	15	15	15	11	18	9	11	16	11	2	1	14	1	14	14	1	17	15	21	18	16	14	3	15	19	18	18	16	16	12	1	13	6+	12	14	13	14	N	12	15	12	16	12	12	13	3	3	13	2	10	2	18	18	8	2	13	13	12	12	3	11	11	18	18	17	16	12	16	12	14	17	17	17	17	18	20	17	19	18	16	5	18	15	15	18	22	6	20	16	14	16	15	15	1	2	16	17	16	16	1	18	17	14	20	16	15	15	15	17	29	3	16	1	16	15	16	14	15	13	21	17	20	16	9	17	1	11	16	14	15	19	N	20	20	17	18	17	18	15	17	16	14	21	24	16	16	13	20	17	17	17	17	16	16	15	6	18	18	16	18	14	15	15	15	17	19	15	15-	15	9	18	16	16	9	13	14	19	15	15	16	14	15	4	13	1	17	22	15	19	6	18	2	15	15	15	15	10	11	15	5	15	17	14	9	13	2	15	15	5	8	18	3	3	3	2	1	1	16	21	1	13	13	13	13	13	1	12	14	15	12	7	17	8	16	16	16	19	14	5	5	5	1	5	5	12	12	16	11	3	15	12	14	2	2	1	13	13	13	15	13	10	15	15	12	1	16	16	1	15	5	5	2	26	15	5	17	14	18	N	20	8	13	14	15	2	3	19	7	17	15	17	15	18	15	17	13	9	15	63-	14	15	17	13	19	15	16	15	10	17	7	17	14	10	6	12	2	15	17	17	4	12	2	1	15	5	5	6	6	14	27	3	14	16	14	17	20	15	14	17	17	16	13	15	15	11	16	N	13	18	17	1	14	6	15	14	17	6	16	13	17	16	13-	15	13	21	16	21	24	14	16	16	14	16	16	5	188-	15	14	16	5	14	16	15	15	17	16	17	21	12-	9	14	10	4	1	1	1	14	13	14	16	15	20	15	20	8	16	11	1	15	16	15	15	23	16	1	15	16	19	16	17	16	16	15	7	11	4	18	19	6	18	18	21	16	17	17	18	22	1	1	17	17	6	6	16	15	6	22	13	9	16	1	4	16	10	1	N	12	7	21	14	14	16	13	2	14	16	12	19	3	14	12	10	17	15	10	27	15	14	6	0?	0?	0?	0?	16	16	18	16	15	16	16	16	13	13	13	1	4	8	18	14	15	11	3	15	27	16	14	15	17	13	16	16	15	17	19	15	16	16	16	4	8	4	16	16	17	17	9	4	4	9	8	5	11	6	8	8	8	4	4	8	8	8	8	13	9	15	18	21	15	15	15	15	16	15	16	22	8	14	16	1	16	1	13	13	15	13	12	16	14	12	20	14	16	12	14	14	18	16	17	20	19	15	25	17	19	6	6	4	6	21	14	21	13	16	13	14	11	16	16	16	16	13	13	15	10	31	16	23-	22	13	16	14	14	15	13	14	25	11	12	17	16	14	11	15	17	13	17	6	16	1	13	9	12	12	16	15	18	1	18	11	15	16	13	18	16	4	17	16	4	16	4	4	4	16	13	12	13	25	12	12	11	12	15	12	13	6	17	17	17	16	17	1	16	13	19	12	1	16	14	13	13	12	16	13	14	15	13	15	15	14	21	15	17	13	12	17	20	16	1	16	1	1	1	1	1	1	1	15	1	20	17	15	12	16	19	18	15	16	20	N	12	18	2	16	19	14	15	22	16	17	1	1	17	15	17	0?	17	6	15	15	13	7	19	20	1	5	13	17	20	9+	N	12	1	16	14	17	14	19	14	13	13	14	14	9	16	1	2	12	11	15	11	1	15	4	15	13	15	14	12	13	14	14	12	6	6	1	5	15	20	14	20	15	13	13	13	13	14	19	14	15	20	16	15	1	17	12	15	14	18	14	15	16	15	14	15	20	17	15	16	2	19	15	13	17	1	15	16	16	16	18	16	15	19	3	16	14	16	7	14	15	11	2	16	1	16	15	18	19	9	2	8	14	16	19	14	9	2	15	14	13	15	13	13	11	13	10	9	13	15	16	12	17	15	1	12	14	12	11	13	18	14	12	14	15	14	14	17	4	17	16	15	15	18	10	22	14	14	13	16	15	6	16	17	15	17	16	19	16	14	9	7	16	8	16	17	13	15	20	20	15	16	15	15	1	21	1	18	17	16	16	1	9	16	1	13	14	10	4	17	2	15	16	14	16	6	15	14	15	15	15	1	4	15	3	13	15	14	14	14	14	1	14	15	16	15	16	12	16	14	8	10	18	15	14	15	8	6	13	12	7	11	13	6	14	9	6	13	14	1	1	3	1	1	1	11	3	1	1	1	6	1	1	1	3	1	1	1	5	1	1	1	9	1	1	10	1	12	14	13	12	2	6	7-	16	14	18	15	16	12	2	15	5	3	6	14	3	3	3	14	16	15	15	15	11	15	14	16	14	16	16	12	15	15	17	15	26	15	18	16	14	11	10	13	15	14	16	17	16	16	14	14	16	14	14	16	3	15	12	13	22	1	4	3	1	4	17	12	9	9	9	4	4	1	9	6	1	4	20	9	18	27	17	17	2	17	14	9	9	23	18	2	2	18	21	22	1	14	18	10	18	15	4	12	16	13	20	16	15	17	17	16	19	17	14	14	12	17	14	15	16	16	18	18	17	9	19	7	17	16	16	18	17	23	17	22	14	19	18	17	15	17	17	16	15	17	3	15	17	16	4	20	4	17	2	20	21	15	13	18	31	14	13	15	19	24	15	16	19	16	8	15	6	20	15	18	20	14	16	13	10	19	17	16	17	15	15	16	17	17	17	16	3	17	17	15	14	4	17	20	18	4	1	20	12	15	62-	15	16	23	17	20	16	18	16	18	16	16	17	17	11	17	19	22	14	15	2	1	18	17	16	1	9	18	17	17	16	17	19	19	35	17	15	18	19	17	17	23	14	13	15	15	15	19	15	13	12	9	12	16	16	14	12	2	13	9	17	2	1	17	14	14	14	22	11	13	5	13	1	14	15	7	14	14	13	13	13	19	12	19	1	12	14	17	19	16	5	17	18	7	20	16	0	0
GCA_000580495.2_ASM58049v2_genomic.fna	14	25	20	19	18	1	1	1	21	23	1	19	3	15	21	18	21	21	19	41	1	10	21	24	3	23	26	6	19	21	2	15	20	13	2	15	24	19	23	19	20	20	25	24	25	22	29	15	2	21	29	28	8	21	22	28	26	26	3	29	24	57	26	27	23	31	26	32	28	22	23	24	24	19	20	3	3	29	21	19	24	35	4	23	33	28	25	30	27	24	23	19	3	19	16	10	20	24	15	17	18	20	16	13	19	20	25	20	15	20	19	17	1	11	1	1	1	12	2	9	11	18	17	20	20	16	19	6	22	24	9	17	22	N	18	19	13	18	17	20	22	3	13	22	17	22	17	18	14	21	19	32	18	13	13	15	1	3	22	13	26	15	19	9	18	20	21	32	21	19	20	16	17	21	20	20	1	22	14	22	18	22	6	18	16	20	20	21	19	14	20	19	19	19	18	22	3	2	5	6	23	18	20	23	1	6	5	11	8	1	36	27	14	13	13	17	18	32	19	24	18	11	N	26	20	17	21	19	10	19	7	16	19	19	18	18	17	20	8	20	23	18	12	18	20	17	18	35	8	18	13	20	23	8	20	21	21	26	28	15	17	8	18	4	26	22	21	27	1	19	19	19	18	17	29	25	20	9	3	15	19	3	8	18	14	22	20	20	1	22	16	17	13	13	20	19	18	20	11	19	20	25	23	18	16	6	18	19	17	23	20	21	4	31	18	1	18	6	11	1	19	19	19	20	19	16	22	20	23	21	19	20	1	20	9	1	28	20	17	23	3	11	3	3	20	1	1	18	15	14	22	7	17	31	18	13	16	18	22	23	14	1	N	13	20	1	18	26	23	20	20	19	19	23	29	6	20	18	24	15	19	20	20	18	20	20	20	11	3	13	17	14	20	19	16	19	23	2	1	20	2	20	18	21	21	19	19	16	21	20	25	14	15	19	18	24	19	27	23	20	17	20	19	2	23	22	1	19	17	19	22	20	17	11	20	17	19	18	14	13	17	13	1	16	25	23	6	17	16	20	1	1	19	18	21	8	22	7	21	16	4	20	17	23	11	17	11	1	3	19	20	21	1	1	22	15	21	29	18	17	18	15	16	19	18	2	2	7	19	19	16	8	19	19	21	18	20	22	31	25	23	19	22	20	22	22	23	18	19	1	24	5	20	25	8	19	1	2	23	17	18	21	16	9	10	2	25	17	21	3	17	4	19	10	28	7	18	16	18	5	21	17	18	19	15	21	14	19	20	21	18	24	18	21	9	23	16	20	8	22	17	27	17	23	19	19	17	3	12	16	2	1	1	16	9	1	14	26	18	16	26	14	1	14	1	4	18	2	20	18	18	19	23	18	30	12	1	29	19	22	21	18	18	26	20	20	1	19	18	1	1	1	9	16	15	16	21	23	21	13	2	1	18	19	18	10	28	16	19	21	17	17	23	4	1	1	19	18	18	21	18	16	13	17	20	22	17	17	23	17	16	25	15	16	1	16	37	17	19	17	15	15	16	16	29	15	14	1	15	16	2	10	20	19	6	19	18	13	17	9	22	21	25	21	16	20	17	22	21	24	20	22	18	21	22	31	22	19	20	8	16	21	19	17	18	20	0?	17	22	22	16	20	2	17	13	19	15	17	6	13	31	19	17	3	15	6	18	14	5	19	20	22	20	23	16	17	8	18	18	22	20	23	18	23	18	16	9	12	20	21	4	16	5	17	18	15	17	1	16	18	2	18	19	25	24	18	20	20	17	22	8	20	7	26	24	3	3	16	1	19	18	2-	15	6	5	10	20	3	19	21	17	17	23	17	21	21	20	18	17	21	17	2	2	15	3	1	32	21	19	20	22	1	20	14	24	8	19	12	16	16	16	26	2	17	11	17	22	6	12	15	22	14	14	19	17	16	13	8	25	21	6	4	16	24	2	14	26	20	17	21	17	20	17	18	1	18	19	20	22	21	23	23	30	24	19	21	18	19	18	23	19	21	0?	0?	0?	0?	0?	0?	0?	0?	0?	0?	0?	0?	0?	0?	0?	0?	0?	18	37	18	18	21	19	20	19	21	23	19	4	14	5	3	19	21	19	20	8	18	25	19	22	28	18	4	19	20	19	19	18	25	19	18	19	18	21	18	22	19	19	29	19	17	19	21	19	16	34	9	19	20	11	16	9	24	20	18	16	24	18	18	24	18	21	18	1	11	21	18	17	30	20	16	17	19	17	17	17	24	17	21	17	14	17	11	17	14	17	3	18	15	17	16	17	3	19	17	18	3	20	12	16	13	23	17	21	21	8	17	22	16	5	5	24	21	15	17	4	1	17	13	25	17	19	21	1	19	3	20	1	23	5	20	15	15	19	1	22	20	21	19	8	1	19	20	18	9	18	18	18	9	1	21	17	17	22	5	18	20	15	1	25	7	17	18	19	22	23	16	16	20	19	N	18	5	15	19	1	11	20	14	11	12	23	11	12	18	10	2	6	16	5	15	16	1	21	2	24	22	21	1	8	18	24	21	21	21	20	19	9	20	15	17	21	6	25	20	9	19	19	24	16	17	18	11	6	17	2	9	11	21	31	2+	2	2	20	14	3	1	2	2	13	21	20	19	19	19	20	19	N	22	22	21	22	23	20	24	23	19	18	21	3	19	22	25	4	1	19	16	13	19	0?	1-	0?	19	21	20	12	17	25	24	18	23	19	19	17	19	20	41	16	19	16	19	6	19	19	19	16	28	21	23	20	6	21	1	13	19	17	18	25	15	27	27	21	20	22	22	18	22	21	18	27	34	20	19	17	24	19	21	21	20	19	19	18	12	22	23	19	21	18	19	19	22	22	23	19	2	18	4	22	20	20	18	15	4	23	18	19	19	18	18	10	16	1	22	12	17	23	15	23	2	22	17	18	19	15	16	19	5	20	22	18	7	15	2	20	19	5	10	23	12	18	1	6	3	10	21	30	1	17	16	11	17	16	1	15	18	N	N	9	22	4	19	20	20	22	20	12	15	13	10	N	17	17	16	19	15	3	19	14	18	20	14	13	7	17	25	6	5	12	17	19	16	10	19	19	2	18	13	14	13	34	17	18	21	21	25	20	26	7	5	16	18	4	1	22	15	20	19	19	19	24	20	20	17	11	21	23	17	19	22	16	21	18	21	19	4	16	15	22	17	12	3	13	1	21	23	22	13	2	8	5	18	16	14	19	19	19	37	15	18	22	17	20	28	19	16	22	24	22	17	18	18	14	20	14	16	21	22	7	18	2	18	17	22	7	23	13	22	18	17	20	18	26	21	27	30	16	20	19	16	19	20	21	6	18	18	19	16	17	19	18	17	21	19	24	27	13	1	17	14	2	1	1	5	18	16	18	21	19	30	19	25	1	20	17	1	20	21	19	7	28	20	2	18	18	24	18	21	19	18	17	4	8	0?	20	23	6	21	21	23	18	19	19	21	26	1	1	19	19	16	18	19	19	14	26	16	16	18	1	1	18	11	7	19	15	1	27	16	5	21	15	1	17	19	14	24	1	17	17	5	21	20	12	38	18	16	6	17	18	28	16	20	20	26	19	20	21	20	21	11	13	2	9	14	10	10	18	18	1	1	20	40	19	17	18	20	16	19	19	18	20	N	18	19	22	19	12	1	15	21	19	21	23	20	15	20	21	11	13	18	5	18	22	20	18	18	19	21	19	17	19	21	20	22	26	18	19	18	19	20	18	20	28	7	18	19	1	19	1	17	18	18	15	15	21	17	2	24	17	19	16	18	17	21	21	20	25	24	19	30	20	18	18	19	19	16	30	17	30	18	10	16	18	14	19	19	20	20	9	16	22	16	42	21	18	25	18	0?	0?	0?	0?	0?	18	30	16	18	21	19	17	11	18	2	15	20	15	20	1	N	7	13	14	19	18	21	9	21	14	17	19	N	23	20	18	20	19	5	21	18	20	19	19	18	15	15	36	5	18	17	18	18	17	9	5	20	22	24	4	22	2	19	13	26	14	1	18	1	1	14	14	19	16	17	13	15	21	22	8	26	18	21	21	17	22	16	21	16	20	25	17	2	24	4	20	9	18	19	26	21	19	15	19	27	24	18	20	28+	14	1	22	2	19	24	16	17	26	19	21	1	1	20	19	23	0?	20	8	19	18	16	3	22	27	1	3	16	7	25	10	8	15	14	20	17	22	17	30	16	17	17	19	19	12	20	1	2	16	16	18	12	1	20	1	18	15	19	17	4	19	17	18	15	13	3	1	1	17	24	18	25	18	17	15	15	16	16	23	17	20	25	32-	19	15	20	15	20	17	24	17	18	19	18	18	19	23	20	19	20	1	24	3	17	21	1	20	19	7	19	23	20	17	24	3	23	19	20	11	17	18	13	11	19	1	20	19	28	25	2	2	3	17	21	24	17	6	12	18	16	18	18	19	21	16	19	3	13	15	21	24	14	26	18	8	2	18	2	14	19	25	18	14	17	20	17	16	20	12	21	18	19	17	22	17	9	18	16	17	19	18	14	14	15	13	15	14	17	15+	13	12	14	15	0?	20	16	12	9	18	26	14	15	14	14	1	25	17	22	19	20	19	14	10	19	1	3	11	3	5	20	15	18	20	18	19	13	18	6	19	18	18	3	3	17	2	17	18	16	16	17	17	8	17	18	19	19	19	16	18	16	17	5	19	19	17	18	10	15	19	23	1	14	25	11	21	14	12	19	29	1	1	3	1	1	1	20	3	1	1	1	3	8	1	1	1	1	1	1	2	7	1	1	4	1	1	11	1	18	19	0?	17	15	19	20	20	16	23	5	20	15	9	18	5	10	12	9	14	18	18	18	21	18	20	18	12	19	18	18	17	22	19	4	6	17	20	18	33	18	20	20	17	14	13	14	18	17	18	21	3	20	20	17	21	17	16	19	6	19	17	20	27	1	16	9	1	0?	0?	0?	0?	0?	0?	14	13	1	20	2	1	15	26	15	21	34	21	23	1	24	18	19	22	28	22	3	19	21	26	28	6	3	21	4	23	19	16	12	19	16	28	18	20	22	21	19	25	21	18	18	16	20	18	8	19	19	22	21	21	1	22	20	22	20	20	21	20	0?	174-	24	18	23	23	22	18	22	21	20	19	21	15	16	21	22	19	1	27	20	18	25	24	22	15	23	47	16	15	18	25	30	18	20	26	20	5	20	20	23	18	21	28	18	20	15	1	24	21	19	20	3	18	18	22	24	21	19	15	20	20	21	17	11	5	24	22	13	1	25	15	17	23	18	14	32	20	28	9	24	88-	24	20	18	20	21	18	23	22	28	17	20	2	1	24	20	20	6	10	23	21	21	0?	22	22	24	50	21	19	21	22	6	20	29	16	17	18	18	18	24	8	15	14	3	N	19	20	0?	15	2	2	5	21	13	1	19	21	20	20	30	15	5	3	10	1	21	28	17	25	19	19	22	18	25	23	23	1	18	15	20	29	18	11	21	22	21	26	19	0	0
GCA_000582965.2_ASM58296v2_genomic.fna	3	3	3	3	3	1	1	1	3	3	1	3	3	3	3	3	3	3	3	34	3	2	3	3	2	3	3	3	1	3	2	3	3	3	3	3	3	3	3	3	3	3	3	3	3	3	3	3	2	3	3	3	2	3	3	3	3	3	2	3	3	40	3	3	3	3	3	19	23	3	3	3	3	3	3	3	3	3	3	3	3	3	3	3	3	3	3	3	3	3	3	3	3	3	3	3	3	3	3	3	3	3	3	3	3	3	3	3	2	3	3	3	1	2	1	1	2	3	2	16	2	3	3	3	3	3	3	3	3	3	3	3	3	N	3	3	3	3	3	3	3	3	3	3	3	3	3	3	2	3	3	25	3	3	3	3	3	3	3	3	3	3	3	3	3	3	3	28	3	3	3	3	3	3	3	3	1	3	3	3	3	3	1	3	3	3	3	3	3	3	3	3	3	3	3	3	3	2	2	3	2	3	3	3	1	2	1	1	3	1	3	3	1	3	3	3	3	3	3	3	3	3	N	3	3	2	3	3	3	3	3	3	3	3	3	3	3	3	3	3	3	3	3	3	3	3	3	33	4	3	3	3	18	3	3	3	3	3	22	3	3	3	3	3	3	3	3	3	1	3	3	3	3	3	3	3	3	3	3	3	3	3	3	3	3	3	3	3	2	3	3	3	3	3	3	3	3	3	1	34	3	3	3	3	3	16	3	3	3	3	3	3	1	3	3	3	3	3	3	2	3	3	3	3	3	3	3	15	3	3	3	3	3	3	3	1	16	3	3	20	3	3	3	3	3	1	1	3	3	3	3	1	3	3	3	3	3	3	3	16	3	1	3	3	3	3	3	68	17	19	3	3	3	3	3	3	3	3	3	1	3	3	3	3	3	3	3	3	3	2	3	2	3	3	3	3	3	2	3	3	3	3	3	3	3	3	3	3	3	3	3	3	3	3	3	17	3	3	3	3	3	3	3	3	3	3	1	3	1	3	3	3	3	3	3	3	3	3	3	3	3	1	1	3	3	3	1	3	3	3	1	1	3	3	3	3	3	3	3	3	3	3	3	3	3	3	3	3	3	3	3	3	2	1	3	3	3	3	3	3	3	3	3	3	3	3	3	3	3	3	3	3	3	3	36	3	3	3	2	3	3	3	3	3	3	3	3	3	3	1	3	1	3	3	3	3	1	1	3	3	3	3	3	2	2	2	3	3	3	3	3	3	3	3	24	1	3	3	3	3	3	3	3	3	3	3	3	17	0?	18	3	3	3	3	3	3	3	3	3	3	3	3	3	3	3	3	3	3	1	3	3	1	1	3	3	1	1	20	3	3	46	3	1	3	1	3	3	2	3	3	3	3	3	3	4	3	3	3	3	3	3	3	3	3	3	3	3	3	3	1	2	3	3	3	3	3	3	3	N	1	2	2	3	3	3	3	3	1	3	3	3	3	3	3	1	3	3	3	3	3	3	3	3	3	3	3	3	3	3	3	3	16	3	3	2	3	95	3	3	3	3	3	3	3	3	3	3	2	3	3	3	3	3	3	1	3	3	3	3	3	3	3	3	3	3	3	3	2	3	3	3	3	3	19	3	74	3	3	3	3	3	3	3	3	3	3	3	3	3	3	3	3	1	3	3	3	3	3	3	3	3	3	3	3	3	2	3	1	3	3	3	3	3	3	3	3	3	3	3	3	3	3	3	48	3	3	3	3	3	3	2	3	3	3	3	3	3	3	3	3	3	3	3	3	3	3	3	3	3	3	3	3	3	23	3	3	3	3	1	3	3	2	3	3	3	15	3	3	3	3	3	3	3	2	2	3	3	3	3	3	3	3	2	3	3	3	25	3	16	17	18	17	17	13	20	15	16	13	1	12	14	19	2	14	10	13	20	16	4	12	20	6	3	3	3	3	3	3	3	3	3	3	3	21	2	2	16	3	3	3-	N	0?	N	3	3	3	3	3	3	3	3	3	3	3	3	3	3	3	3	3	3	3	21	3	3	3	3	3	3	3	3	3	3	15	3	3	3	3	20	3	17	3	3	3	3	3	3	3	3	3	1	1	3	3	3	3	3	3	3	3	3	2	3	24	3	1	3	3	3	3	3	3	3	3	2	N	3	3	3	3	3	3	3	3	3	3	3	3	3	3	3	3	3	3	3	3	3	3	3	21	3	3	3	3	3	3	3	3	22	3	3	3	3	3	3	3	3	3	3	16	3	3	3	3	3	3	3	3	0?	3	3	3	3	3	1	3	3	3	3	3	3	3	3	3	3	3	3	3	2	3	3	3	3	3	16	3	3	3	3	1	3	3	3	3	3	3	3	3	3	3	2	3	2	3	3	3	3	1	3	3	3	3	3	3	3	3	3	3	3	3	3	3	3	3	3	3	3	3	3	3	3	3	3	3	3	3	3	3	3	3	3	3	3	3	3	1	3	3	1	3	3	3	3	3	3	3	3	3	3	2	3	3	3	1	3	2	3	1	18	3	3	3	3	3	3	3	3	37	3	N	1	3	3	3	3	3	3	3	3	3	3	3	3	3	3	3	3	3	2	3	3	3	24	3	3	3	3	3	3	1	3	3	3	3	3	3	3	N	3	3	3	3	3	3	3	3	3	3	3	3	3	3	3	3	3	3	1	2	3	3	3	3	3	2	2	3	3	3	3	3	3	3	3	3	3	3	3	3	3	32	3	35	1	3	3	3	3	3	3	3	3	3	3	3	3	15	3	3	3	3	3	N	25	22	3	3	56	3	3	50	3	3	15	3	3	3	3	3	3	3	3	3	3	3	3	3	3	3	3	3	3	3	3	3	3	3	3	3	3	3	3	3	3	3	3	3	3	3	3	3	3	3	3	3	1	3	3	3	3	3	3	2	3	3	3	3	3	3	3	3	3	3	3	3	3	2	3	3	3	1	3	3	3	2	3	1	2	3	3	1	3	3	3	3	3	2	3	3	3	3	3	3	3	3	3	3	3	3-	3	3	3	2	3	3	3	3	3	3	3	3	2	3	3	1	2	3	3	3	3	3	3	3	3	3	1	3	3	3	3	3	3	3	18	3	3	3	3	3	3	3	2	3	3	3	3	1	3	3	3	3	3	3	3	3	3	3	3	3	3	3	3	3	3	3	3	3	3	2	3	3	3	3	3	3	3	2	17	3	3	3	3	3	1	3	3	3	3	3	16	30	3	3	3	3	3	3	3	3	3	3	3	3	185+	3	3	3	3	1	3	3	2	2	2	3	3	3	2	3	3	3	3	1	3	3	18	3	3	3	3	3	3	3	3	3	3	2	3	3	3	3	3	3	3	3	3	3	3	3	3	3	3	3	2	2	1	2	3	3	3	3	3	3	3	3	3	3	3	1	3	3	3	3	3	3	1	3	3	3	34	3	3	3	3	3	3	3	3	3	2	3	2	3	3	3	37	3	17	1	1	3	3	3	3	3	3	3	25	3	3	3	2	1	3	3	2	3	3	3	3	3	3	3	3	2	3	3	3	3	1	3	3	3	3	3	2	3	3	3	3	3	3	17	3	3	3	3	3	3	3	3	3	3	52	1	3	3	3	3	3	3	1	1	3	9	3	3	3	3	3	3	3	3	3	3	3	3	3	3	3	3	3	3	3	3	3	3	3	3	3	3	3	3	3	3	3	3	3	3	3	3	3	3	3	3	3	3	3	3	3	3	3	3	3	3	3	3	3	3	1	3	1	3	3	3	3	3	3	3	3	3	3	3	3	38	2	3	3	3	3	3	3	3	3	16	3	3	3	3	26	3	18	3	3	3	3	3	3	3	3	3	3	3	3	3	107	18	3	49	3	3	3	3	3	3	3	17	3	3	3	3	3	3	3	3	3	3	3	3	1	3	3	3	3	3	3	15	1	3	3	3	3	N	3	3	3	3	3	3	3	3	3	3	3	3	3	3	3	14	3	3	3	3	3	3	3	3	3	3	3	2	1	3	3	3	3	2	3	3	3	3	1	3	2	3	3	3	3	3	3	3	3	3	3	3	2	3	3	3	3	3	3	2	3	3	3	2	3	3	3	3	3	3	3	3	3	3	3	3	N	3	3	2	3	3	3	3	3	3	3	3	1	3	3	3	0?	3	3	3	3	3	3	3	3	1	2	3	3	3	3	3	3	3	3	3	3	3	3	3	3	3	3	3	3	3	1	2	3	3	3	3	1	3	1	3	3	3	3	3	3	3	3	2	2	2	1	1	3	3	3	3	3	3	3	3	3	3	3	3	3	3	3	3	3	3	3	3	3	3	3	3	3	3	3	3	3	3	3	3	2	3	3	3	3	1	3	3	3	3	3	3	3	3	3	3	3	3	3	3	3	3	2	3	1	3	3	3	3	3	1	3	3	3	3	3	3	3	3	3	3	3	3	3	3	3	3	3	3	2	3	1	3	3	2	3	3	3	3	3	20	3	2	3	3	3	3	3	3	3	3	3	3	3	3	15	3	3	3	3	3	3	3	3	3	3	3	3	3	3	3	3	3	2	3	3	N	3	3	3	3	3	3	3	1	3	3	3	3	3	3	3	3	3	1	3	3	2+	3	3	3	3	3	3	3	3	3	3	3	3	3	1	1	3	1	3	3	3	1	3	3	3	3	3	3	3	3	3	3	3	3	1	3	3	3	3	2	3	3	3	2	3	3	3	3	3	3	3	3	1	3	2	1	1	1	14	3	1	1	2	2	1	1	1	1	1	1	1	2	3	2	1	3	1	1	2	1	3	3	3	3	3	3	3	3	3	3	3	3	2	2	3	1	2	3	3	3	3	4	3	3	3	3	3	3	3	3	3	3	3	3	3	3	3	3	3	27	3	3	3	3	2	3	3	3	3	3	3	3	3	3	3	3	3	3	3	3	3	3	3	3	1	3	2	1	3	3	3	3	3	3	3	4	1	3	3	1	3	3	3	3	18	3	3	2	3	3	3	3	3	3	3	3	3	3	3	3	3	3	1	3	3	3	1	3	3	3	3	17	3	3	3	3	40	3	3	3	3	3	3	3	3	3	3	3	3	3	3	3	3	3	3	3	3	3	3	3	3	3	3	3	3	3	3	3	3	3	3	3	3	3	3	3	3	3	3	3	50	3	3	34	3	3	3	3	3	3	3	3	3	1	1	3	3	3	3	3	3	3	2	2	3	3	3	3	3	3	3	3	3	3	3	1	3	3	3	2	2	3	3	3	3	2	3	3	3	3	3	3	69	3	22	3	44	3	3	3	3	3	3	3	3	3	3	3	3	3	1	3	3	3	1	3	3	3	3	3	3	3	3	18	3	3	3	3	3	3	3	3	3	3	3	3	17	3	3	3	3	3	3	2	3	3	2	3	3	3	3	1	3	3	3	3	3	3	3	3	3	1	3	3	3	3	3	3	3	3	3	3	3	1	3	3	3	3	3	2	3	3	3	3	3	0	0
GCA_000584375.2_ASM58437v2_genomic.fna	2	18	11	11	N	1	1	1	12	12	1	11	2	10	12	11	12	12	11	12	10	8	12+	12	6	19	19	10	16	17	2	13	N	N	6	8	19	17	19	16	14	17	20	20	N	20	N	14	2	5	12	23	73	7	7	24	22	21	7	22	9	319	6	101	21	27	24	27	26	20	22	22	23	16	17	16	16	19	N	13	18	18	8	14	19	13	14	14	15	14	18	16	13	8	13	N	15	18	5-	13	15	14	12	11	13	17	16	16	17	N	16	N	3	5	1	1	1	1	1	1	1	1	1	1	N	1	1	1	1	1	1	1	1	10	15	1	1	1	1	N	1	1	1	1	1	1	2	1	1	1	1	21	1	1	1	1	1	1	1	1	13	1	1	1	1	6	6	5	5	5	6	4	1	1	1	32	1	1	1	1	1	1	1	1	1	1	1	1	1	N	1	1	1	1	1	6	1	1	1	1	1	1	1	1	N	1	1	1	1	1	1	N	1	1	1	1	1	20	N	1	1	1	1	1	1	N	N	N	6	1	1	1	N	1	1	1	N	N	1	1	1	1	1	1	1	1	1	1	1	1	1	1	1	1	1	1	1	1	1	1	1	1	1	1	1	N	1	1	1	1	1	1	1	1	1	N	41	1	N	1	1	1	1	1	1	1	1	1	1	1	1	1	1	1	1	1	1	85	1	1	1	1	1	1	1	1	1	1	1	1	1	1	1	1	1	1	1	1	1	1	1	1	1	1	1	1	1	1	1	1	13	1	1	1	1	1	1	1	1	1	1	1	1	1	1	1	1	1	1	1	1	1	1	1	1	1	N	1	1	1	1	1	1	10	1	N	1	1	1	1	1	N	1	1	1	1	1	1	1	1	41	1	1	1	1	1	N	1	1	1	1	1	1	1	1	6	1	1	N	1	1	1	1	17	N	1	1	1	1	1	1	1	1	N	1	1	1	N	13	76	1	1	1	1	1	1	1	1	1	1	1	1	1	1	N	N	1	1	N	1	1	1	1	1	1	1	1	1	N	1	1	1	1	1	1	1	1	1	1	1	1	1	1	1	1	N	1	1	1	1	1	1	N	1	1	1	1	1	N	1	1	1	1	6	1	1	1	1	1	1	1	15	1	1	1	1	1	1	1	1	N	1	1	1	1	N	1	1	15	1	1	1	1	N	1	1	N	1	1	1	1	1	1	1	1	1	1	N	1	1	1	1	1	1	1	1	1	1	1	3	1	1	1	1	1	1	1	1	1	1	1	1	1	1	1	1	1	1	1	1	1	1	1	1	1	1	1	1	1	1	1	1	1	1	1	1	1	1	1	6	N	1	1	1	1	1	1	N	6	1	1	1	6	1	N	1	1	1	1	1	16	1	1	1	1	1	1	1	N	1	1	1	1	1	1	1	1	N	1	1	1	1	1	1	N	1	1	1	1	1	1	1	N	1	1	1	1	1	1	N	1	1	1	1	1	1	6	1	1	1	16	25	15	16	1	N	20	17	15	17	15	15	16	N	18	15	14	1	15	16-	2	10	1	1	1	1	1	1	1	1	1	1	1	1	1	1	1	1	1	1	1	1	1	1	1	1	6	1	N	1	1	1	1	1	1	1	1	1	1	1	1	1	1	1	1	1	1	1	1	1	1	1	1	1	1	1	1	1	1	1	1	1	1	1	1	1	1	1	1	1	1	1	1	1	1	1	1	1	1	N	1	1	1	N	32	N	1	1	1	N	1	1	1	1	1	1	1	1	1	1	N	1	1	16	1	1	1	1	1	1	N	1	1	1	1	1	1	1	1	1	1	1	6	1	46	1	1	1	1	1	1	1	1	1	1	1	1	1	1	1	1	1	N	1	6	1	1	1	13+	1	1	1	1	1	1	N	1	1	1-	N	1	1	1	1	1	1	1	1	1	1	1	1	1	1	1	1	1	1	1	1	1	1	1	1	1	1	N	1	1	1	1	1	N	1	N	1	1	1	1	1	1	N	N	1	1	1	1	1	N	1	1	1	6	1	1	1	1	1	1	1	1	1	1	1	1	1	N	1	1	1	1	N	1	1	1	1	1	1	1	N	1	1	1	1	1	1	1	1	1	1	N	1	1	1	1	1	1	1	1	1	1	1	1	1	1	1	1	1	1	1	1	1	1	1	1	1	1	1	1	1	1	1	1	1	1	1	1	N	1	1	1	6	1	1	1	1	1	1	1	1	1	1	1	1	1	1	1	1	N	N	1	1	34	1-	N	1	1	1	N	N	1	1	1	1	1	1	N	1	1	1	13	1	1	1	1	1	1	1	1	1	1	1	1	1	1	35	1	1	1	1	1	1	1	1	1	N	1	1	1	1	1	1	1	1	1	1	1	1	1	1	1	N	1	1	1	1	6	1	1	1	1	1	1	1	1	1	N	1	1	1	N	1	N	N	1	1	1	N	1	1	1	1	1	10	1	24	1	1	1	1	1	1	1	1	1	1	N	1	1	N	1	1	8	1	1	1	1	1	1	1	N	1	N	N	1	1	6	1	N	1	1	1	1	1	1	1	1	1	1	1	1	1	N	1	1	1	N	1	1	1	1	1	1	1	1	1	1	1	1	1	1	1	1	1	1	1	1	1	1	1	1	1	1	1	1	1	1	1	N	1	1	1	1	1	1	1	438+	6	1	1	1	1	1	1	1	1	1	1	N	1	1	1	1	N	1	1	1	1	1	1	1	1	1	1	16	1	N	1	1	14	17	1	1	1	1	N	N	1	1	1	1	1	N	1	1	N	1	1	1	1	1	6	1	1	1	1	1	1	1	1	1	1	1	1	1	1	1	1	1	1	1	1	1	1	N	1	1	1	1	1	1	1	1	1	1	1	1	31	16	1	1	1	1	1	6	1	1	1	1	1	1	N	1	1	N	1	1	N	1	1	1	1	1	1	1	1	1	1	1	1	1	1	1	1	1	4	1	1	N	1	1	1	1	1	1	1	N	1	1	N	N	1	N	1	1	N	1	1	1	1	1	1	1	1	1	1	1	1	1	1	1	1	1	N	1	1	1	1	1	1	1	1	6	1	1	16	1	1	1	1	1	1	1	1	1	1	1	1	82	1	14	1	6	1	N	1	1	1	1	1	1	N	1	1	N	1	1	1	1	1	N	1	1	N	1	1	1	N	1	1	1	1	1	1	1	1	1	1	1	1	1	1	1	1	6	1	1	1	N	1	6	1	1-	1	1	1	1	1	1	1	1	1	1	1	N	1	1	1	1	1	1	1	1	1	N	1	15	1	1	1	1	1	N	1	1	1	1	1	1	1	1	1	1	1	1	1	1	6	1	1	1	1	1	1	1	1	1	1	1	1	1	1	1	N	1	1	1	1	1	1	1	1	N	1	1	1	1	1	1	44	1	1	1+	N	1	1	1	1	1	1	1	6	N	1	1	1	1	1	1	1	1	1	1	1	1	1	1	1	1	1	1	1	1	1	1	1	1	1	1	1	1	1	1	1	1	N	1	1	1	1	1	1	N	1	1	1	1	1	1	6	1	1	1	1	1	1	1	1	15	1	1	1	1	1	1	N	1	1	1	1	1	1	1	1	1	1	1	6	5	5	5	6	5	5	5	5	5	6	5	4	5	5	1	6	6	1	1	6	N	5	5	5	1	N	1	1	1	1	1	1	1	1	1	1	1	1	1	1	1	N	1	1	1	15	19	1	1	1	1	1	1	1	14	1	1	1	1	1	1	N	1	1	1	1+	33	1	1	6	1	1	1	1	1	1	1	1	1	1	1	1	1	1	1	1	1	1	1	1	N	1	N	1	1	1	1	1	1-	N	1	15	1	1	1	1	1	1	1	1	1	1	1	1	1	N	1	1	1	1	1	N	1	1	1	1	1	1	1	1	1	1	1	1	1	1	6	1	1	1	1	1	N	1	1	1	1	1	1	1	1	1	1	1	1	1	1	1	1	1	1	N	1	6	1	N	1	1	1	1	1	1	1	1	1	1	1	N	1	1	1	1	1	1	1	1	N	1	1	1	6	1	1	1	1	1	1	1	1	1	1	1	1	1	1	16	6	1	1	1	1	1	1	1	1	1	1	1	126	1	1	1	1	1	1	N	1	1	1	1	1	1	1	N	1	1	1	N	1	6	1	1	1	1	1	N	1	1	1	1	1	1	1	1	1	1	3	1	70	1	1	1	1	1	1	1	1	N	N	1	1	1	1	1	1	1	1	1	1	1	1	1	1	1	1	1	1	1	6	1	1	1	N	N	1	1	1	1	1	1	1	1	1	1	1	N	17	15	81	N	4	17	1	1	1	1	1	1	1	1	1	N	1	1	1	N	1	1	1	1	1	1	1	1	1	1	1	N	1	1	1	1	1	N	1	1	1	1	1	1	1	1	1	16	1	1	1	1	1	1	1	1	19	1	1	1	1	1	1	1	6	1	1	1	1	1	1	1	1	1	68	1	N	1	62	1	1	N	1	1	14	14	14	15	13	N	14	17	15+	13	12	14	15	0?	15	16	12	13	N	17	N	15	14	14	1	N	1	1	1	N	1	1	1	1	1	1	1	1	1	1-	1	1	1	1	1	1	1	1	1	1	1	1	1	1	1	1	1	1	1	1	1	1	1	1	1	1	1	1	1	1	1	1	1	1	1	1	1	1	1	1	1	1	1	1	1	1	1	N	1	1	1	3	1	1	1	1	1	1	1	1	N	1	1	1	1	1	1	1	1	1	1	1	1	1	1	10	1	N	14	N	12	2	6	0?	16	14	N	15	16	12	2	64	5	3	6	14	1	1	1	76	16	90	15	72	11	15	16	87	N	15	15	11	27	14	16	14	18	14	16	15	13	2	3	10	14	10	10	16-	15	15	15	15	15	12	13	14	N	13	14	15	18	1	13	4	1	8	12	N	N	12	11	9	4	1	14	7	1	9	N	11	14	20	6	6	3	6	6	6	6	N	6	6	6	6	6	134	1	5	6	1	6	6	6	5	6	6	6	6	6	6	6	6	6	6	6	6	6	6	6	6	6	6	6	6	6	6	6	6	6	6	6	16	6	17	N	6	6	6	6-	16	3	3	3	3	3	3	3	3	3	3	6	16	3	15	3	3	16	6	6	12	6	6	4	6	6	N	6	6	6	6	5	5	N	6	6	13	6	6	6	5	1	6	6	6	6	3	5	6	6	6	N	15	9	N	12	11	11	10	12	13	17	10	1	12	10	11	13	1	11	1	11	12	2	12-	12	17	12	58	12	13	12	N	12	12	11	11	7	N	12	12	11	1	3	11	12	12	11	12	12	12	12	11	10	16	12	12	12	20	11	10	12	12	11	12-	11	10	7	8	10	12	11	N	10	2	11	7	12	9	1	13	12	12	12	12	11	11	11	11	5	N	12	11	N	14	13	13	13	13	12	19	1	74	56	12	12	12	6	N	12	12	12	11	0	0
GCA_000584515.2_ASM58451v2_genomic.fna	14	25	20	19	18	1	1	1	21	23	1	19	3	15	21	18	21	21	19	41	1	10	21	24	3	23	26	6	19	21	2	15	20	13	16	15	24	19	23	19	20	20	25	26	25	22	29	15	2	21	29	28	8	21	22	28	26	26	3	29	24	57	26	27	23	31	26	32	28	22	23	24	24	19	20	3	3	29	21	19	24	35	4	23	33	28	25	30	27	24	23	19	3	19	16	10	20	24	15	17	18	20	16	13	19	20	25	20	15	20	19	17	1	11	1	1	1	12	2	9	11	18	17	20	20	16	19	6	22	24	9	17	22	N	18	19	13	18	17	20	22	3	13	22	17	22	17	18	14	21	19	32	18	13	13	15	1	3	22	13	26	15	19	9	18	20	21	32	21	19	20	16	19	21	20	20	1	22	14	22	18	22	6	19	16	20	20	23	19	14	20	19	19	19	18	22	3	2	5	6	23	5	20	23	1	6	5	11	8	1	36	27	14	13	13	17	18	32	19	24	18	11	N	26	20	17	21	19	10	19	7	16	19	19	18	18	17	20	8	20	23	18	12	18	20	17	18	35	8	18	13	20	23	8	20	21	21	29	30	15	17	8	18	4	26	22	21	27	1	19	19	19	18	17	29	25	20	9	3	15	19	3	8	18	14	22	20	20	1	22	16	17	13	13	20	19	18	20	11	19	20	25	23	20	16	6	18	19	17	23	20	21	4	31	18	1	18	6	11	1	19	19	19	20	19	16	22	20	23	21	19	20	1	21	9	1	28	20	17	23	3	11	3	3	20	1	1	18	15	14	22	7	17	31	18	13	16	18	22	25	14	1	N	13	20	1	18	26	23	20	20	19	19	23	29	6	20	18	24	15	19	20	20	18	20	20	20	11	3	13	17	14	20	19	16	19	23	2	1	20	2	20	18	21	21	19	19	16	21	20	25	14	15	19	18	24	19	27	23	20	17	20	20	2	23	22	1	19	17	19	22	20	17	11	20	17	19	18	14	13	17	13	1	16	30	23	6	17	16	20	1	1	19	18	21	8	22	7	21	16	4	20	17	23	11	17	11	1	3	19	20	21	1	1	22	15	21	29	18	17	18	15	16	19	18	2	2	7	19	19	16	8	19	19	21	18	20	22	31	25	23	19	22	20	22	22	23	18	19	1	24	5	20	25	8	19	1	2	23	17	18	21	16	9	10	2	25	17	21	3	17	4	19	10	28	7	18	16	18	5	21	17	18	19	15	21	14	19	20	21	18	25	18	21	9	23	16	20	8	22	17	27	17	23	19	19	17	3	12	16	2	1	1	16	9	1	14	26	18	16	26	14	1	14	1	4	18	2	20	18	18	19	23	18	30	12	1	29	19	22	22	18	18	26	20	20	1	19	18	1	1	1	9	16	15	16	21	23	21	13	2	1	18	19	18	10	28	16	19	21	17	17	23	4	1	1	19	18	18	22	18	16	13	17	20	22	17	17	23	17	16	25	15	16	1	16	37	17	19	17	15	15	16	16	29	15	14	1	15	16	2	10	20	19	6	19	18	13	17	9	22	21	25	21	16	20	17	22	21	24	20	22	18	21	22	31	22	19	20	8	16	21	19	17	18	20	0?	17	22	22	16	20	2	17	13	19	15	17	6	13	31	19	17	3	15	6	18	14	5	19	20	22	20	23	16	17	8	18	20	22	20	23	18	23	18	16	9	12	21	21	4	16	5	17	18	15	17	1	16	18	2	18	19	25	24	18	20	20	19	22	8	20	7	26	24	3	3	16	1	19	18	2-	15	6	5	10	20	3	19	21	17	17	23	17	21	21	20	18	19	21	17	2	2	15	3	1	32	21	19	20	22	1	20	15	24	8	19	12	16	16	16	26	2	17	11	17	22	6	12	15	22	14	14	19	17	16	13	8	25	21	6	4	16	24	2	14	26	20	17	21	17	20	17	18	1	19	19	20	22	21	24	23	0?	24	19	21	18	19	18	23	19	21	0?	0?	0?	0?	0?	0?	0?	0?	0?	0?	0?	0?	0?	0?	0?	0?	0?	18	37	18	18	23	19	20	19	21	23	19	4	14	5	3	19	21	19	20	8	18	25	19	22	30	21	4	19	20	19	19	18	26	19	18	19	18	21	18	23	1	1	1	1	1	1	1	1	1	1	1	1	1	1	1	1	1	1	1	1	1	1	1	1	1	1	1	1	1	1	1	1	6	1	1	1	19	17	17	17	24	17	21	17	14	17	11	17	14	17	3	18	15	17	16	17	3	19	17	18	3	20	12	16	13	23	17	22	21	8	17	22	16	5	5	24	21	15	17	4	1	17	13	26	17	19	21	1	19	3	20	1	23	5	20	15	15	19	1	22	20	21	19	8	1	19	20	18	9	18	18	18	9	1	21	17	17	22	5	18	20	15	1	25	7	17	18	19	22	23	16	16	20	19	18	18	5	15	19	1	11	20	14	11	12	23	11	12	18	10	2	6	16	5	15	16	1	21	2	24	22	21	1	8	18	24	21	21	21	0?	19	9	20	15	17	21	6	25	20	9	19	19	24	16	17	18	11	6	17	2	9	11	21	33	2+	2	2	20	14	3	1	2	2	13	21	20	19	19	19	20	22	21	22	22	21	22	23	20	25	23	19	18	21	3	19	22	25	4	1	19	16	13	19	18	2	2	19	21	20	12	17	25	24	18	23	19	19	17	19	20	41	16	19	16	19	6	19	19	19	16	28	21	23	20	6	21	1	13	19	17	18	25	15	27	27	21	20	22	22	18	22	21	18	27	34	20	19	17	24	19	21	21	20	19	19	18	12	22	23	19	21	18	19	19	24	22	23	19	2	18	4	22	20	20	18	15	4	23	18	19	19	18	18	10	16	1	22	12	17	23	15	23	2	22	17	18	19	15	16	19	5	20	22	18	7	15	2	20	19	5	10	23	12	19	1	6	3	10	21	30	1	17	16	11	17	16	1	15	18	21	N	9	24	4	19	20	20	22	20	12	15	13	10	N	17	17	16	19	15	3	19	14	18	20	14	13	7	17	25	6	5	12	17	19	16	10	19	19	2	18	13	14	13	34	17	18	22	21	25	20	26	7	5	16	18	4	1	22	15	20	19	19	19	24	20	20	17	11	21	23	17	21	22	16	21	18	21	19	4	16	15	22	17	12	3	13	1	21	24	22	13	2	8	5	18	16	14	19	19	19	37	15	18	22	17	20	28	19	16	22	24	22	17	18	18	14	20	14	16	21	22	7	18	2	18	17	22	7	23	13	22	18	17	20	18	26	21	27	30	16	20	19	16	19	20	21	6	18	19	19	16	17	19	18	17	21	19	24	27	13	1	17	14	2	1	1	5	18	16	18	21	19	30	19	31	1	20	17	1	20	21	19	7	28	20	2	18	18	24	18	21	19	18	17	4	8	0?	20	23	6	21	21	23	18	19	19	21	26	1	1	20	19	16	18	19	19	14	26	16	16	18	1	1	18	11	7	19	15	1	27	16	5	21	15	1	18	19	15	27	1	17	17	5	21	20	12	38	18	16	6	19	18	28	16	20	20	26	19	20	21	20	21	11	13	2	9	14	10	10	18	18	1	1	20	40	19	17	18	20	16	19	19	18	20	24	18	19	22	19	12	1	15	21	19	21	23	20	15	20	21	11	13	18	5	18	22	20	18	18	19	21	19	17	19	21	20	22	26	18	19	18	19	20	18	20	28	7	18	19	1	19	1	17	18	18	15	15	21	17	2	24	17	19	16	18	17	21	21	20	27	24	19	30	20	18	18	19	19	16	30	17	30	18	10	16	18	14	19	19	20	20	9	16	22	17	42	21	18	25	18	0?	0?	0?	0?	0?	18	30	16	19	21	19	17	11	18	2	15	20	15	20	1	N	7	13	14	19	18	21	9	21	14	17	19	N	23	20	18	20	6	5	21	18	20	19	19	18	15	15	36	5	18	17	18	18	17	9	5	20	22	24	4	22	2	19	13	26	14	1	18	1	1	14	14	19	16	17	13	15	21	22	8	26	18	21	21	17	22	16	21	16	20	27	17	2	24	4	20	9	18	19	26	21	19	15	19	28	24	18	20	28+	14	1	22	2	21	24-	16	17	26	19	21	1	1	20	19	23	0?	20	8	19	18	16	3	22	27	1	3	16	7	25	4	8	15	14	20	17	22	17	30	16	17	17	19	19	12	20	1	2	16	16	18	12	1	20	1	18	15	19	17	4	19	17	18	15	13	3	1	1	17	24	18	25	18	17	15	15	16	16	23	17	20	25	32-	19	15	20	15	20	17	24	17	18	19	18	18	19	23	20	19	20	1	24	3	17	21	1	20	19	7	19	23	20	17	24	3	23	19	20	11	17	18	13	11	19	1	20	19	28	25	2	2	3	17	21	24	17	6	12	18	16	18	18	19	21	16	19	3	13	15	21	24	15	26	18	8	2	18	2	14	19	25	18	14	17	20	17	16	20	12	21	18	19	17	22	17	9	18	16	17	19	18	14	14	15	13	15	14	22	15+	13	12	14	15	0?	20	16	12	9	18	26	14	15	14	14	1	25	17	22	19	20	19	14	10	19	1	3	11	3	5	22	15	18	20	18	19	13	18	6	19	18	18	3	3	17	2	17	18	16	16	17	17	8	17	18	19	19	19	16	18	16	17	5	19	19	17	18	10	15	9	8	6	8	8	8	7	8	1	20	9	1	10	3	1	1	1	20	3	1	1	1	3	8	1	1	1	1	1	1	2	7	1	1	4	1	1	11	1	18	19	0?	17	15	19	20	20	16	23	5	20	15	9	18	5	10	12	9	14	18	18	18	21	18	20	18	12	19	18	18	17	22	19	4	6	17	20	18	33	18	20	20	17	14	13	14	18	17	18	21	3	20	20	17	21	17	16	19	6	19	17	20	27	1	16	9	1	0?	0?	0?	0?	0?	0?	14	13	1	20	2	1	15	26	15	21	34	21	23	1	24	18	19	22	28	22	3	19	21	26	28	6	3	21	4	23	19	16	12	19	16	28	18	20	22	21	19	25	21	18	18	16	20	18	8	19	19	22	21	21	1	22	20	22	20	20	21	20	0?	174-	24	18	23	23	22	18	22	21	20	19	21	15	16	21	22	19	1	27	20	18	25	24	23	15	23	47	16	15	18	25	34	18	20	26	20	5	20	6	23	18	21	28	18	20	15	1	24	21	19	20	3	18	18	22	24	21	19	15	20	20	21	17	11	5	24	22	13	1	25	15	17	23	18	14	32	20	28	9	24	88-	24	20	18	20	21	18	26	22	28	17	20	2	1	24	20	20	6	10	23	21	21	0?	22	22	24	50	21	19	21	22	6	20	29	16	17	18	18	18	24	8	15	14	3	N	20	20	0?	15	2	2	5	21	13	1	19	21	20	20	30	15	5	3	10	1	21	28	17	25	19	19	22	18	25	23	23	1	18	15	20	29	18	11	21	22	21	26	19	0	0
GCA_000588575.2_ASM58857v2_genomic.fna	4	6	6	6	6	1	2	1	6	6	2	6	3	3	6	6	6	6	12	6	1	5	6+	6	3	6	6	5	5	6	2	5	6	6	5	5	6	6	6	6	5	6	6	6	6	6	6	6	3	6	6	6	5	6	12	14	14	14	1	1	13	13	13	12	13	6	6	6	6	6	6	6	6	6	6	6	6	6	6	6	6	6	6	6	6	6	6	6	6	6	6	6	5	6	5	6	6	6	6	5	6	5	6	5	5	6	6	6	5	6	6	6	3	5	1	1	2	5	2	6	4	6	6	6	5	6	6	6	6	6	5	6	6	N	6	6	4	6	6	6	6	5	5	5	6	6	5	6	5	6	6	6	6	6	5	6	1	1	1	1	13	1	1	1	1	6	6	5	5	5	6	4	1	1	21	6	1	1	1	1	1	1	1	1	1	1	1	1	1	1	1	1	1	1	1	6	4	1	1	1	1	1	1	1	1	1	1	31	1	1	1	1	1	1	1-	1	1	1	1	1	1	1	1	1	1	1	1	1	6	1	1	1	1	1	1	1	1	1	1	1	1	1	1	1	1	1	1	1	1	1	1	1	1	1	1	1	1	1	1	1	1	1	1	1	1	1	N	1	1	1	1	1	1	1	1	6	1	1	1-	1	1	1	1	1	1	1	0?	1	1	1	1	1	1	1	1	1	1	1	1	1	1	1	1	1	1	1	1	1	1	1	1	1	1	1	1	1	1	1	1	1	1	1	1	1	1	1	1	1	1	1	1	1	1	1	1	1	1	1	1	1	1	1	1	1	1	1	1	1	1	1	1	1	1	1	1	1	1	1	1	1	1	1	1	1	1	1	1	1	1	1	1	1	1	1	1	1	1	1	1	1	1	1	1	1	1	1	1	1	1	1	1	1	1	1	1	6	1	1	1	1	1	1	1	1	1	1	1	1	1	1	1	1	1	1	1	1	1	6	13	18	1	1	1	1	1	1	1	1	1-	20	1	1	1	1	1	1	1	1	1	1	1	1	1	1	1	1	1	1	1	1	1	1	1	1	1	1	1	1	1	1	1	1	1	1	1	1	1	1	1	1	1	1	1	1	1	1	1	1	1	1	1	1	1	6	1	1	1	1	1	1	1	1	1	1	1	1	1	1	1	1	1	1	1	1	1	0?	1	1	1	1	1	1	1	1	1	1	1	1	1	1	1	1	1	1	1	1	1	1	6	1	1	1	1	1	1	1	1	1	1	3	1	1	1	1	1	1	1	1	1	1	1	1	1	1	1	1	1	1	1	1	1	1	1	1	1	1	1	1	1	1	1	1	1	1	1	1	1	1	1	6	1	1	1	1	1	1	1	1	6	1	1	1	6	1	1	1	1	1	1	1	1	1	1	1	1	1	1	1	1	1	1	1	1	1	1	1	1	1	1	1	1	1	1	1	N	1	1	1	1	1	1	1	1	1	1	1	1	1	1	1	1	1	1	1	1	1	6	1	19	1	12	11	11	12	10	12	13	13	11	12	11	11	11	13	13	1	1	1	1	1	1	1	1	1	1	1	1	1	1	1	1	1	1	1	1	1	1	1	1	1	1	1	1	1	1	1	6	1	6	1	1	1	1	1	1	1	1	1	1	1	1	1	1	1	1	1	1	1	1	1	1	1	1	1	1	1	1	1	1	1	1	1	1	1	1	1	1	1	1	1	1	1	1	1	1	1	1	1	1	6	1	1	1	1	1	1	1	1	1	1	1	1	1	20	1	1	1	1	1	15	1	1	1	1	1	1	1	1	1	1	1	1	1	1	1	1	1	1	1	1	1	1	6	1	1	1	1	1	1	1	1	1	1	1	1	1	1	1	1	1	1	1	1	1	6	1	1	0?	0?	1-	1	1	1	1	1	1	1	1	1	1	1	1	1	1	1	1	1	1	1	1	1	1	1	1	1	1	1	1	0?	1	1	1	1	1	1	1	1	1	1	1	1	1	1	1	1	1	1	1	1	1	1	6	1	1	1	1	1	1	1	1	1	22	6	1	1	1	1	1	1	1	1	1	1	1	77	1	1	1	1	1	1	1	1	1	1	1	1	1	1	1	1	1	1	1	1	1	1	1	1	1	1	1	1	1	1	1	1	1	1	1	1	1	1	1	1	1	1	1	1	1	1	17	1	1	1	1	1	1	1	1	1	1	1	1	1	1	1	1	1	1	1	6	1	1	1	1	1	1	1	1	1	1	1	6	74-	1	1	1	1	1	1	1	1	1	1	1	128-	1	1	1	0?	1	1	1	1	1	1	1	1	1	1	1	1	1	1	1	1	1	1	1	1	1	1	1	1	1	20	1	1	1	1	1	1	1	1	1	1	1	1	1	1	1	1	1	1	1	1	1	1-	1	1	1	1	1	1	1	6	1	1	1	1	1	107	1	1	1	1	1	1	1	1	1	0?	1	1	1	1	1	1	1	1	1	1	1	1	5	1	1	1	1	1	1	1	1	1	1	1	1	1	1	1	1	8	1	1	1	1	1	1	1	1	1	1	1	1	1	6	0?	0?	1	1	1	1	1	1	1	1	1	1	1	1	1	0?	0?	0?	0?	0?	1	1	1	1	1	1	1	1	1	1	1	1	1	1	1	1	1	1	1	1	1	1	1	1	1	1	1	1	1	1	1	1	1	1	1	1	1	1	6	438+	6	1	102-	1	1	1	1	1	1	1	0?	0?	1	1	1	1	1	1	1	1	1	1	1	1	1	1	1	1	1	1	1	1-	1	1	1	1	1	1	1	1	1	1	1	1	1	1	1	1	1	1	1	1	19	1	6	1	1	1	1	1	1	1	1	1	1	1	1	1	1	1	1	1	1	1	1	1	1	1	1	1	1	1	1	1	1	1	1	1	1	0?	0?	0?	1	1	1	1	1	6	1	1	1	1	1	1	1	1	1	1	1	1	1	1	1	1	1	1	1	1	1	1	1	1	1	1	1	1	1	1	1	1	6	1	1	1	1	1	1	1	1	1	1	1	1	1	1	1	1	1	1	1	1	1	1	1	1	1	1	1	1	1	1	1	1	1	1	1	1	1	1	1	1	1	1	1	1	6	1	1	1	1	1	1	1	1	1	1	1	1	7	1	1	1	1	1	1	6	1	1	1	1	1	1	1	1	6	1	1	1	1	1	1	1	1	1	1	1	1	1	1	1	1	0?	0?	1	1	1	1	1	1	1	1	1	1	1	1	1	1	6	1	1	1	1	1	6	1	1	1	1	1	1	1	1	1	1	1	1	1	1	1	1	1	1	1	1	1	1	1	1	1	1	1	1	1	1	1	6	1	1	1	1	1	1	1	1	1	1	1	1	1	1	6	1	1	1	1	1	1	1	1	1	1	1	1	1	1	1	1	1	1	1	1	1	1	1	1	1	0?	68-	0?	0?	114	1	1	1	1	1+	1	1	1	1	1	1	1	1	6	1	1	1	1	1	3	1	1	1	1	1	1	1	1	1	1	1	1	1	1	1	1	1	1	1	1	23	N	1	1	1	1	1	1	1	1	1	1	1	1	1	1	1	6	1	1	1	6	1	1	1	1	1	1	1	1	1	1	1	1	1	1	1	1	1	1	1	1	1	1	1	1	1	1	1	6	5	5	5	6	5	5	5	5	5	6	5	4	5	5	1	6-	24	1	1	6	6-	5	5	5	1	1	1	1	1	1	1	1	1	1	1	1	1	1	1	1	1	1	1	1	1	1	25	1	1	1	1	1	1	1	1	1	1	1	1	1	1	1	1	1	1	0?	1	1	1	6	1	1	1	1	1	1	1	1	1	1	1	1	5	1	1	1	1	1	1	1	1	1	1	1	18	1	1	1	1	1	1	1	1	1	1	1	1	1	1	1	1	1	1	1	1	1	1	1	1	1	1	1	1	1	1	1	1	1	1	1	1	1	1	1	1	1	6	1	1	1	1	1	1	1	0?	1-	1	1	1	1	1	1	1	1	1	1	1	1	1	1	1	1	1	6	1	1	1	1	1	1	1	1	1	1	1	1	1	1	1	1	1	1	1	1	1	1	1	1	1	1	6	1	1	1	1	1	1	1	1	1	1	1	1	1	1	1	6	1	1	1	1	1	1	1	1	1	1	1	6	1	1	1	1	1	1	1	1	1	1	1	1	1	1	1	1	1	1	1	1	6	1	1	1	1	1	1	1	1	1	1	1	1	1	1	1	1	1	1	1	1	1	1	1	1	1	1	1	1	1	1	1	1	1	1	1	1	1	1	1	1	1	1	1	1	1	1	1	1	6	1	1	1	1	1	1	1	1	1	1	1	1	1	1	1	1	1	1	1	1	1	1	1	1	1	1	1	1	1	1	1	1	1	1	117	1	1	1	21	1	0?	1	1	1	1	1	1	1	1	1	1	1	1	1-	1	1	1	1	1	1	1	1	1	1	1	1	1	1	1	1	1	1	1	1	1	1	1	1	1	1	1	6	1	1	1	1	1	1	1	1	1	1	1	1	1	1	1	1	1	1	1	1	1	1	1	1	1	1	6	1	1	1	1	1	1	1	1	4	1	0?	1	1	1	1	1	1	1	1	1	1	1	1	1	1	1	1	1	1	1	1	6	1	1	1	1	1	1	1	1-	1	1	1	1	1	1	1	1	1	1	1	1	169-	1	1	1	1	1	1	1-	1	0?	0?	0?	1	1	1	1	1	1	1	1	1	1	1	1	1	1	1	1	1	1	1	3	1	1	1	1	1	1	1	1	3	1	1	1	1	1	1	1	1	1	1	1	1	1	1	1	1	1	1	95	12	2	6	0?	90	1	1	1	1	1	1	1	1	1	1	1	1	1	1	1	1	1	1	1	1	1	1	1	1	1	1	1	1	1	1	1	1	1	1	1	1	1	3	1	1	1	1	1	1	1	1	1	1	1	1	1	1	0?	1	6	1	1	1	1	1	1	6	6	6	6	6	6	9	2	6	1	2	5	1	1	1	6	19	6	3	6	6	6	6	6	6	6	6	6	6	71	1	5	6	1	6	6	23	5	6	6	6	6	6	6	6	6	21	6	6	6	6	6	6	6	6	6	6	6	6	6	6	6	6	6	6	6	6	98	6	6	6	6	6	6	3	3	3	3	3	3	3	3	3	3	6	3	3	3	3	6	3	6	6	12	6	6	4	6	6	6	6	6	6	6	5	5	6	6	6	13	6	6	6	5	1	6	6	6	6	3	5	6	6	6	6	6	4	6	6	6	4	5	6	6	6	5	3	6	5	6	6	6	6-	6	6	6	6	6	6	6	6	6	6	6	6	6	6	160+	6	6	2	1	6	6	6	3	3	6	6	6	6	6	6	6	5	5	5	5	13	6	6	6	6	6	6	6	6	6	5	5	5	4	6	6	5	6	5	2	5	6	6	6	2	6	6	6	6	6	6	6	6	6	3	6	13	6	6	6	6	6	6	6	6	6	4	5	5	6	6	5	5	6	6	6	13	6+	0	0
GCA_000614705.1_ASM61470v1_genomic.fna	28	N	54	42	51	1	8	1	48	N	11	42	5	28	N	54	52	40	33	348	2	2	N	57	4	45	63	2	1	44	2	9	45	32	31	37	N	42	48	37	7	45	52	67	66	N	68	28	25	8	85	64	15	N	15	N	1	1	1	1	1	1	1	1	1	97	1	1	81	72	1	1	N	1	1	1	N	1	1	1	1	N	1	1	1	1	56	66	64	54	46	42	36	38	35	4	2	N	36	42	11	10	9	14	N	57	58	N	N	51	49	18	3	N	1	15	11	10	2	49	3	48	40	49	64	6	12	36	57	N	5	28	61	N	38	N	4	42	33	47	75	10	9	57	43	N	N	57	39	58	N	N	N	4	8	22	1	3	N	10	56	52	45	2	N	46	55	80	N	42	52	N	46	55	39	45	6	70	5	55	3	N	1	40	41	49	49	56	3	3	50	3	44	37	43	N	N	2	15	44	66	N	N	54	1	1	9	22	1	1	121	N	26	30	28	N	50	98	46	47	36	10	N	65	50	N	57	45	11	N	34	32	N	49	35	33	45	50	3	8	N	41	2	N	48	N	45	88	4	28	5	5	62	N	69	47	56	N	68	33	N	38	N	5	N	72	62	N	6	56	38	40	38	44	104	N	60	46	6	33	46	31	14	N	26	N	46	15	N	63	9	42	5	1	10	64	52	N	6	17	50	69	67	43	37	58	8	39	8	55	55	66	1	83	47	1	64	1	N	1	42	28	44	45	50	42	49	51	61	50	2	N	8	49	18	17	79	47	39	71	11	3	1	3	N	1	1	41	37	38	51	13	40	N	44	22	N	47	58	N	16	1	26	17	N	1	57	87	60	7	50	N	40	62	N	48	60	45	60	17	61	56	53	48	48	N	66	37	3	1	34	23	45	51	9	N	44	4	10	48	5	24	43	58	61	61	47	32	76	51	N	26	45	N	20	61	N	68	24	49	34	43	26	15	N	59	1	47	48	50	65	48	35	49	48	20	43	46	N	34	41	N	1	30	69	57	1	36	35	54	N	15	42	39	59	13	18	3	N	20	N	55	N	56	22	37	1	42	24	38	45	14	22	3	50	34	49	67	48	N	42	38	38	44	48	12	52	35	48	9	7	43	N	46	49	50	47	61	92	61	73	N	33	57	52	N	61	52	56	1	90	1	56	66	21	56	N	2	58	4	55	59	1	2	1	6	77	49	57	N	34	7	24	1	72	1	45	40	39	3	N	35	44	45	36	46	3	38	56	47	15	58	43	64	37	63	47	59	1	N	51	66	56	61	48	N	40	23	33	50	35	1	1	30	25	1	28	80	52	N	65	38	20	N	1	6	13	8	53	N	53	43	25	42	76	9	3	77	48	53	51	57	39	59	20	48	1	50	23	1	2	53	48	37	36	33	49	64	48	24	2	13	1	44	N	3	73	30	25	N	23	42	54	29	1	5	48	N	32	72	57	N	42	46	N	54	47	50	63	55	67	N	58	66	5	48	120	77	51	40	N	59	55	69	82	45	37	2	N	N	35	1	246	33	29	49	44	16	44	4	55	49	68	54	40	51	44	61	62	63	51	N	40	57	N	N	58	49	56	8	44	56	35	31	43	36	N	N	60	48	37	55	1	27	27	49	35	48	36	31	N	48	N	44	N	7	43	31	N	21	5	N	46	62	35	N	11	48	N	59	45	58	42	68	37	33	10	15	54	53	18	33	39	40	43	32	N	3	38	44	26	N	46	70	N	45	56-	N	44	58	N	44	9	N	68	38	28	41	1	N	50	28	N	N	3	83	55	9	49	74	14	35	N	47	66	N	50	43	43	N	40	2	2	24	2	1	110	51	56	55	61	38	56	1	N	36	43	29	1	12	15	59	3	40	22	34	55	38	2	N	66	29	35	52	N	33	33	40	N	55	40	N	4	24	2	37	N	47	51	50	N	54	40	49	N	43	53	55	58	55	61	60	N	52	42	42	N	49	42	58	55	49	65	47	48	N	N	56	56	55	41	52	64	N	N	39	47	30	62	47	107	48	52	63	50	58	54	44	N	49	1	36	5	5	54	N	47	42	5	41	50	33	N	N	52	25	51	47	49	52	50	61	N	45	51	52	52	N	55	6	177	N	54	46	N	27	53	51	N	61	38	N	9	13	11	52	N	N	12	79	43	46	71	43	N	48	18	17	52	42	44	97	49	36	33	45	39	44	54	67	42	N	48	4	40	6	8	41	48	10	40	37	19-	44	N	4	204	2	42	2	45	N	33	23	66	45	63	68	33	38	55	15	3	4	65	55	36	34	N	1	44	N	N	N	N	45	1	45	10	53	N	53	2	44	45	5	46	28	56	53	N	45	N	1	43	39	13	6	N	44	36	43	3	7	33	36	52	4	N	57	27	35	73	3	3	24	43	46	65	33	5	51	51	54	40	5	43	44	1	34	18	44	N	3	78	10	27+	56	3	2	13	N	2	32	4	1	57	24	75	64	52	52	22	43	57	N	62	N	46	53	2	52	7	35	61	47	60	61	52	52	54	65	40	47	N	22	4	2	2	13	4	N	80	16	2	23	0?	0?	0?	68-	0?	0?	0?	0?	N	54	48	45	N	56	55	59	49	57	52	58	45	64	N	53	27	55	7	49	60	N	13	98	51	44	53	49	46	2	10	N	60	58	47	46	74	77	N	62	58	59	45	50	55	116	37	54	37	48	50	46	48	24	33	N	62	N	N	22	61	1	9	40	46	52	81	45	67	N	66	N	74	66	13	66	57	50	N	117	48	49	54	75	50	N	57	53	21	57	43	4	68	59	37	57	44	50	52	N	53	59	52	42	15	32	63	50	58	14	N	31	54	45	51	17	41	13	39	46	1	N	15	6	15	42	56	30	62	19	43	46	41	37	50	1	49	64	53	3	43	2	58	173	2	15	60	9	N	3	15	10	22	45	94	1	34	51	42	N	29	7	36	N	69	4	3	14	4	51	42	N	55	5	5	38	5	1	5	43	42	33	48	30	3	5	28	46	52	6	27	36	23	67	47	35	5	2	46	42	1	N	47	13	40	15	14	27	94	N	15	N	53	N	58	73	20	40	44	50	32	19	55	2	N	30	37	44	N	51	N	43	N	62	68	21	58	68	42	54	46	53	53	25	48	37	N	46	4	12	3	2	N	70	58	28	23	6	1	48	35	N	47	49	50	N	11	N	62	N	23	75	51	197	N	66	61	46	40	52	31	47	N	38	66	58	2	46	4	47	43	50	15	58	25	N	16	43	N	49	83	48	N	94	41	14	14	13	53	54	50	N	47	44	47	3	3	49	N	40	61	N	65	64	31	19	N	N	N	2	1	2	46	50	37	53	44	96	N	82	1	2	8	1	56	8	N	11	7	18	2	17	N	N	51	63	57	48	39	4	7	36	51	54	N	62	58	73	N	N	42	44	57	1	1	56	N	18	45	6	54	33	N	34	31	41	1	5	N	2	1	51	37	1	N	45	5	60	47	10	6	6	34	65	2	45	54	14	56	52	31	N	48	3	3	44	45	59	37	8	66	N	59	50	45	31	33	2	68	59	23	N	9	15	N	14	1	1	14	108	55	48	49	N	35	39	N	43	59	58	14	N	60	51	23	1	12	32	9	N	62	57	22	58	68	N	33	N	N	49	69	62	51	50	31	59	58	53	53	69	N	60	68	40	41	45	66	54	51	55	N	1	6	58	1	47	9	41	13	1	30	26	49	41	29	59	5	39	10	52	47	61	N	20	63	78	41	89	54	56	36	32	52	41	89	33	76	49	48	41	7	24	47	55	44	N	36	33	38	36	N	55	43	69	1	56	19	49	15	49	19	32	17	48	56	51	23	32	47	56	4	N	N	52	1	N	9	17	43	45	38	48	18	N	32	6	54	29	N	52	20	46	49	40	7	3	N	50	48	N	4	42	108	24	46	10	22	17	25	1	1	30	74	34	6	36	2	39	23	57	31	6	48	42	3	4	1	N	22	22	23	38	N	50	3	64	N	55	60	51	55	69	53	36	N	83	48	28	N	47	N	2	49	55	65	54	55	12	N	N	62	48	56	85	N	4	56	11+	51	60	48	46	N	57	51	30	5	49	59	63	0?	N	6	46	17	31	2	N	78	1	3	1	50	84	4	8	17	30	55	52	58	43	97	42	46	22	9	60	24	211	1	9	44	10	47	25	1	199	1	44	8	46	18	10	34	50	55	34	N	5	2	1	39	68	6	65	53	41	41	9	43	13	71	N	63	61	N	N	1	47	7	50	34	N	48	N	56	N	45	45	56	53	44	N	2	59	43	44	43	1	N	N	46	24	N	48	45	75	15	60	49	N	2	55	47	33	N	50	1	47	41	75	74	N	1	3	34	10	N	46	19	4	42	34	43	39	43	47	29	48	1	1	1	54	78	172	77	47	4	13	46	2	14	65	64	N	38	N	N	39	2	54	28	N	41	48	37	51	5	6	27	42	2	22	46	37	N	57	43	54	1	N	64	41	34	40	57	28	47	N	38	43	71	89	25	26	24	25	1	40	27	31	N	53	46	7	4	58	1	12	11	N	13	51	38	47	51	10	48	N	43	29	44	N	47	7	1	15	20	2	44	31	35	37	5	5	5	46	56	53	47	17	43	22	41	25	48	49	46	42	2	35	N	64	1	29	78	N	63	N	2	N	73	1	7	N	3	1	1	N	6	1	1	1	5	4	3	1	1	1	1	1	6	N	1	1	N	1	N	1	1	2	52	56	35	27	N	44	55	3	59	3	53	17	18	40	1	4	27	46	42	47	35	44	52	49	54	37	4	N	44	N	27	61	42	27	10	33	50	N	82	42	50	53	50	32	29	36	40	11	41	54	34	N	33	31	48	48	41	45	N	48	42	51	3	1	N	1	2	8	66	29	33	N	27	N	31	1	58	20	1	36	0?	3	61	N	N	64	20	70	35	36	57	75	49	3	N	59	61	77	1	19	53	17	29	N	38	27	N	38	N	37	46	59	71	45	66	N	12	44	46	50	44	44	50	N	13	54	55	32	52	52	12	61	57	54	N	62	47	N	42	50	54	52	23	N	54	50	52	53	39	28	57	5	5	5	5	5	5	73	57	71	12	60	N	45	37	42	59	105	N	3	N	N	1	1	3	58	3	3	68	36	51	35	21	N	58	44	50	43	6	43	43	60	47	N	23	N	44	N	27	8	46	65	44	4	N	62	3	3	N	42	46	84	50	78	N	60	19	55	39	42	56	54	41	57	66	65	22	5	15	N	70	55	49	1	7	N	6	58	39	64	57	68	N	67	45	54	62	52	N	67	N	47	10	41	0?	N	N	11	3	2	18	52	56	48	35	2	41	20	56	N	1	50	63	56	48	N	N	47	34	49	18	N	77	43	75	14	51	50	N	73	57	57	1	46	43	52	N	42	6	50	51	9	N	32	0	0
GCA_000671455.1_ASM67145v1_genomic.fna	12	21	19	17	17	1	1	1	20	17	2	18	3	2	20	16	19	5	18	48	1	2	19+	21	2	21	24	12	18	19	2	5	19	9	6	8	22	10	12	10	19	10	12	11	10	11	12	9	5	20	28	26	20	19	21	26	24	23	1	24	20	160	24	22	14	28	14	26	12	12	13	13	11	11	11	10	3	11	11	11	22	28	4	20	28	61	6	6	6	6	6	6	5	6	5	6	6	6	6	5	6	5	6	5	5	6	6	6	25	6	6	6	3	5	1	1	2	5	2	6	4	6	6	6	5	6	6	6	6	6	5	6	6	N	6	6	4	6	6	6	6	5	5	5	6	6	5	6	5	6	6	6	6	6	5	6	1	1	1	1	13	1	1	1	1	6	6	5	5	5	6	4	1	1	1	6	1	1	1	1	1	1	1	1	1	1	1	1	1	1	1	1	1	1	1	6	4	1	1	1	1	1	1	1	1	1	1	1	1	1	1	1	1	1	1-	1	1	1	1	1	1	1	1	19	1	1	1	1	6	1-	1	1	1	1	1	1	1	1	1	1	1	1	1	1	1	1	1	1	21	1	1	15	1	1	1	1	1	1	23	1	1	1	1	1	1	1	1	1	1	1	1	1	1	1	1	6	1	1	1	1	1	1	1	1	1	17	1	1	1	1	1	1	1	1	1	1	1	1	1	1	1	1	1	1	1	17	1	1	1	1	1	1	1	16	1	1	1	1	1	1	1	1	1	1	1	1	1	16	1	1	1	1	1	1	1	1	1	1	1	1	1	1	1	1	1	1	1	1	1	1	1	1	1	1	1	1	1	1	1	1	1	1	1	1	1	1	1	18	1	1	1	1	1	1	1	1	1	1	1	1	1	1	1	1	1	1	1	1	1	1	1	1	1	1	1	6	1	1	1	1	1	1	1	1	1	1	1	1	1	1	1	1	1	1	1	18	1	6	13	1	1	1	1	1	1	20	1	1	1	1	1	1	1	1	1	1	1	1	1	1	1	1	1	1	1	1	1	1	1	1	1	1	1	1	1	1	1	1	1	1	1	1	1	1	1	1	1	1	1	1	1	1	1	1	1	1	1	1	1	1	1	13	1	6	1	1	1	1	1	1	1	1	17	1	1	1	1	1	1	1	1	1	1	1	1	1	1	1	1	1	1	1	1	1	1	1	1	1	1	1	1	1	1	1	1	1	1	1	6	1	1	16	1	1	18	1	1	1	1	3	1	1	1	1	1	1	1	1	1	1	1	1	1	15	1-	1	1	1	1	1	1	1	1	1	1	1	1	1	1	1	1	1	1	1	1	1	1	1	1	6	17	1	1	1	1	1	1	1	6	1	1	1	6	1	22	1	1	1	1	1	1	1	1	1	1	1	1	1	1	1	1	1	1	1	1	1	1	1	1	1	1	1	1	1	1	1	1	1	1	1	1	1	1	1	1	1	1	1	1	1	1	1	1	1	1	1	6	1	19	1	12	27	11	12	10	12	33	13	11	12	11	11	11	19	13	1	1	1	1	1	1	1	1	1	1	1	1	1	1	1	1	1	1	1	1	1	1	1	1	1	1	1	1	1	1	1	6	1	6	1	1	1	1	1	1	1	1	1	1	17	1	1	1	1	1	1	1	1	1	1	20	1	1	1	1	1	1	1	1	1	1	1	1	1	1	1	1	1	1	1	1	1	1	1	1	1	1	1	1	6	1	1	1	1	1	1	1	1	1	1	1	1	1	22	1	1	1	1	1	1	1	1	1	1	1	1	1	14	1	1	1	1	1	1	1	1	1	1	1	1	1	1	6	1	1	1	1	1	1	1	1	1	1	1	1	1	18	1	1	1	1	1	1	1	6	1	1	1	1	1	1	1	1	1	1	1	1	1	1	1	15	1	1	1	1	1	1	1	1	1	1	1	1	17	1	1	1	1	1	1	1	1	1	1	1	1	1	1	1	1	1	1	1	1	1	1	1	1	1	1	1	6	1	1	1	1	1-	187	1	1	1	1	6	1	23	1	1	1	1	1	1	1	1	1	1	17	1	1	1	1	1	12	1	1	1	1	1	1	1	1	1	1	1	1	1	1	1	1	1	1	1	1	1	1	1	1	1	1	1	1	1	1	1	1	1	1	1	1	1	15	1	1	1	1	1	1	1	1	1	16	1	1	1	1	1	16	1	1	17	1	1	6	1	1	1	1	1	1	1	1	1	1	1	6	1	1	1	15	1	1	1	1	1	1	1	1	1	1	1	1	1	1	1	1	201	1	1	1	1	1	1	1	1	1	17	1	1	1	1	1	1	1	1	1	1	1	1	16	1	1	1	1	1	1	1	1	1	1	1	1	1	1	1	1	1	1	1	1	1	1	1	1	1	1	1	1	6	1	1	1	1	1	1	1	1	1	1	1	1	1	1	1	1	1	1	1	1	1	1	1	1	1	1	1	1	5	1	1	1	1	1	1	1	1	1	1	1	1	1	1	1	1	8	1	1	1	1	1	1	1	1	1	1	1	1	1	6	1	1	1	1	1	1	1	1	1	1	1	1	1	1	1	17	1	1	1	1	1	1	1	1	1	1	1	1	1	1	1	1	1	1	1	19	1	1	1	1	1	1	1	1	1	1	1	1	1	1	1	1	1	1	1	1	1	1	6	438+	6	1	1	20	1	1	1	1	1	1	1	1	24	1	1	1	1	1	1	1	1	1	1	1	1	1	1	1	1	1	1	1	1	1	1	1	101	1	1	1	1	1	1	1	1	281	1	1	1	15	1	1	1	1	6	1	1	1	1	1	1	1	17	1	1	1	251	1	1	1	1	1	1	1	1	1	1	1	1	1	1	1	1	1	1	1	1	1	1	1	1	1	12	1	1	1	1	6	1	1	1	1	1	1	1	1	1	1	1	1	1	1	1	1	1	14	1	1	1	1	1	1	1	1	1	1	1	1	1	1	6	1	1	1	1	1	1	1	1	1	1	1	1	1	1	1	1	1	1	1	1	1	1	1	1	1	1	1	1	1	1	1	1	1	1	1	1	1	1	1	1	1	1	1	1	46	1	1	1	1	1	1	1	1	1	1	1	1	1	1	1	1	1	1	1	6	1	1	1	1	1	1	1	1	258	1	1	1	1	1	1	1	1	1	1	11	1	1	1	1	1	1	1	1	1	1	1	1	1	1	1	1	19	1	1	1	1	6	1	1	1	1	1	6	1	1	1	1	1	1	1	1	1	1	1	1	1	1	1	1	1	1	1	1	1	1	1	1	1	1	1	1	1	1	1	6	1	1	1	1	1	1	1	1	1	1	1	1	1	15	6	1	1	1	1	1	1	1	1	1	1	1	1	1	1	1	1	1	1	1	1	1	1	1	1	1	1	1	1	1	1	1	1	1	1	1+	1	1	1	1	1	1	17	1	6	1	1	1	17	1	3	1	1	1	1	1	1	1	1	1	1	1	1	1	1	1	1	1	1	1	1	22	1	1	1	1	1	1	1	1	17	1	1	1	1	1	1	1	6	1	1	1	6	1	1	1	1	1	1	1	1	1	1	1	14	1	1	1	1	1	1	1	1	1	1	1	18	1	1	1	6	5	5	5	6	5	5	5	5	5	6	5	4	5	5	1	6	6	1	1	15	6	5	5	5	1	1	1	1	1	1-	1	1	1	1	1	1	1	1	1	1	1	1	1	1	1	1	1	1	1	1	1	1	1	1	1	1	1	1	1	1	1	1	1	1	1	1+	1	1	1	18	22	17	1	19	1	1	1	1	1	1	18	1	23	1	1	1	1	1	1	1	1	1	1	1	1	1	30	1	1-	1	1	1	1	1	1	1	1	24	1	1	1	1	1	1	1	1	1	1	1	1	1	1	1	1	1	1	1	1	1	1	1	1	1	1	1	1	6	1	1	1	1	1	1	1	1	1	1	1	19	1	1	1	1	1	1	1	1	1	1	1	1	1	1	6	1	1	1	1	1	1	1	1	1	1	1	1	1	1	1	1	1	1	1	1	1	1	1	1	1	1	6	1	1	1	1	1	1	1	1	1	1	1	1	1	1	1	6	1	1	1	1	1	1	1	1	1	1	1	6	1	1	1	1	1	1	1	1	1	1	1	1	1	1	1	1	1	1	1	1	6	1	1	1	1	1	1	1	1	22	1	1	1	1	1	1	1	1	1	1	1	1	1	1	1	1	1	1	1	1	1	1	1	1	1	1	1	1	1	1	1	1	1	1	1	1	1	1	1	6	1	1	1	15	1	1	1	1	1	1	1	1	1	1	1	1	1	1	1	1	1	1	1	1	1	1	1	1	1	1	1	1	1	1	1	1	1	1	1	1	1	1	1	1	1	1	1	1	1	16	1	1	1	1	1	1	1	1	1	1	1	1	1	1	19	1	1	1	1	1	1	1	1	1	1	1	1	1	1	1	1	6	1	1	1	1	1	1	1	1	1	1	1	1	1	1	16	1	1	1	1	1	1	1	1	1	1	1	6	1	1	1	1	1	1	1	1	4	1	1	1	1	1	1	1	1	1	1	17	1	1	1	1	1	1	1	1	1	1	1	6	1	1	1	1	1	1	1	1	1	1	1	1	1	1	1	1	1	1	1	1	1	1	1	1	1	1	1	1	1	1	1	1	1	1	1	1	1	1	1	1	1	1	1	1	1	1	1	1	1	1	1	3	1	1	1	1	1	1	1	1	3	1	1	1	1	1	1	1	1	1	1	1	1	1	1	1	1	1	1	1	1	1	1	1	1	1	1	1	1	1	1	1	1	1	1	1	1	1	1	1	1	1	1	1	1	1	1	1	1	1	1	1	1	1	1	1	1	1	1	1	1	1	3	1	1	1	1	1	1	1	1	1	1	1	1	1	1	1	1	6	28	9	1	1	1	1	6	6	6	6	6	6	9	2	6	1	2	5	1	1	1	26	6	6	3	6	6	6	6	6	6	6	6	6	6	14	1	5	6	1	6	6	6	5	6	6	6	6	6	6	6	6	21	6	6	6	6	6	6	6	6	6	6	6	6	6	6	6	14	6	6	6	6	22	6	6	6	6	6	6	3	3	3	3	3	3	3	3	3	3	6	3	3	3	3	6	3	6	6	12	6	6	4	6	6	28	6	6	17	6	5	5	6	6	6	13	6	6	6	5	1	6	6	6	6	3	5	6	6	6	6	6	4	6	6	6	4	5	6	6	6	5	3	6	5	6	6	6	6	22	6	24	6	20	6	6	6	6	6	6	6	6	6	160+	6	6	2	1	6	6	6	3	3	6	6	6	17	6	6	6	40	5	5	5	255	6	6	6	6	6	6	6	6	6	5	5	5	4	6	6	5	6	5	2	5	6	6	6	2	6	6	6	6	6	6	6	6	6	3	6	13	6	22	18	17	4	4	21	19	21	6	17	5	19	21	17-	9	19	18	19	22	18	0	0
GCA_000671695.1_ASM67169v1_genomic.fna	2	18	11	11	11	1	1	1	12	12	1	11	2	10	12	11	12	12	11	12	10	8	12+	12	6	19	19	10	16	17	2	13	16	14	6	8	19	17	19	16	14	17	20	20	19	19	22	9	5	5	12	12	11	5	11	12	12	12	6	20	6	22	20	18	4	21	20	4	19	11	19	19	19	16	17	16	16	19	13	13	18	18	8	14	19	13	14	14	15	14	18	16	13	8	13	12	15	18	5-	13	15	14	12	11	13	17	16	16	17	15	16	13	3	5	1	1	1	1	1	1	1	1	1	1	1	1	1	1	1	1	1	1	1	10	15	1	1	1	1	1	1	1	1	1	1	1	2	1	1	1	1	21	1	1	1	1	1	1	1	1	13	1	1	1	1	6	6	5	5	5	6	4	1	1	1	1	1	1	1	1	1	1	1	1	1	1	1	1	1	1	1	1	1	1	1	6	1	1	1	1	110	1	1	1	1	1	1	1	1	1	1	1	1	1	1	1	1	20	1	1	1	1	1	1	1	1	1	1	6	1	1	1	1	1	1	1	1	1	1	1	1	1	1	1	1	1	1	1	1	1	1	1	1	1	1	1	1	1	1	1	1	1	1	1	1	1	1	1	1	1	1	1	1	1	1	6	1	1	1	1	1	1	1	1	1	1	1	1	1	1	1	1	1	1	1	1	1	15	1	1	1	1	148	1	1	1	1	1	1	1	1	1	1	1	1	1	1	1	1	1	1	1	1	1	1	1	1	1	1	1	13	1	1	1	1	1	1	1	1	1	1	1	1	1	1	1	1	1	1	1	1	1	1	1	1	1	1	1	1	1	1	1	1	10	1	1	1	1	1	1	1	1	1	18	1	1	1	1	1	1	1	1	1	1	1	1	1	1	1	1	1	1	1	1	1	6	1	1	1	1	1	1	1	17	1	1	1	1	1	1	1	1	1	1	1	N	1	6	13	1	1	1-	1	1	1	1	1	1	1	1	15	1	1	1	15	1	1	15	1	1	1	1	1	1	17	1	1	1	1	1	1	1	1	1	1	1	1	1	1	1	1	1	1	1	1	1	1	1	1	1	1	1	1	1	1	1	1	1	1	1	1	1	1	6	1	1	1	1	1	1	1	15	1	1	1	1	1	1	1	1	1	1	1	1	1	1	1	1	15	1	1	1	1	1	1	1	1	1	1	1	1	1	1	1	1	1	1	1	1	1	1	1	1	1	1	1	1	1	1	3	1	1	1	1	1	1	1	1	1	1	1	1	1	1	1	1	1	1	1	1	1	1	1	1	1	1	1	1	1	1	1	1	1	1	1	1	1	1	1	6	1	1	1	1	1	1	1	1	6	1	1	1	6	1	1	1	1	1	1	1	16	1	1	17	1	1	1	1	1	1	1	1	1	1	1	1	1	1	1	1	1	1	1	1	1	1	1	1	1	1	1	1	1	1	1	1	1	1	1	1	1	1	1	1	1	1	6	1	1	1	16	25	15	16	1	16	20	17	15	17	15	15	16	16	18	15	14	1	15	16	2	10	1	1	1	1	1	1	1	1	1	1	1	1	1	1	1	1	1	1	1	1	1	1	1	1	17	1	6	1	1	1	1	1	1	1	1	1	1	1	1	1	1	1	1	1	1	1	1	1	1	1	1	1	1	1	1	1	1	1	1	1	1	1	1	1	1	1	1	1	1	1	1	1	1	1	1	1	1	6	1	1	1	1	1	1	1	1	1	1	1	1	1	15	1	1	1	1	1	1	0?	0?	0?	0?	1	1	1	1	1	1	1	1	1	1	1	1	1	1	1	1	1	1	6	1	1	1	1	1	1	1	1	1	1	1	1	1	1	1	1	1	1	1	1	1	6	1	1	1	13+	1	1	1	1	1	1	1	1	1	1	1	1	1	1	1	1	1	1	1	1	1	1	1	1	1	1	1	1	1	1	1	1	1	1	1	1	1	1	1	1	1	1	1	1	1	1	1	1	1	1	1	1	6	1	1	1	1	1	1	1	1	1	1	6	1	1	1	1	1	1	1	1	1	1	1	1	1	1	15	1	1	1	12	1	1	1	1	1	1	1	1	1	1	1	1	1	1	1	1	1	1	1	1	1	1	1	1	1	1	1	1	1	1	1	1	1	1	1	1	1	1	1	1	1	1	1	1	1	1	1	1	1	1	1	1	1	1	1	1	1	1	1	6	1	1	1	1	1	1	1	1	1	1	1	1	1	1	1	1	1	1	13	1	1	1-	1	1	1	1	14	1	1	1	1	1	1	1	1	1	1	1	13	1	1	1	1	1	1	1	1	1	1	1	1	1	1	1	1	1	1	1	1	1	1	1	1	1	1	1	1	1	1	1	1	1	N	1	1	1	1	1	1	1	1	1	1	1	6	1	1	1	1	1	1	1	1	14	1	1	1	1	1	1	N	1	1	1	1	1	1	1	1	1	1	10	1	1	1	1	1	1	1	1	1	1	1	1	1	1	1	1	1	1	8	1	1	1	1	1	1	1	1	1	1	1	1	1	6	1	1	1	1	1	1	1	1	1	1	1	1	1	1	1	1	1	1	1	1	1	1	1	1	1	1	1	1	1	1	1-	1	1	1	1	1	1	1	1	1	1	1	1	1	1	1	1	1	1	1	1	1	1	1	1	1	1	1	1	438+	6	1	1	1	1	1	1	1	1	1	1	N	1	1	1	1	1	1	1	1	1	1	1	1	1	1	1	16	1	1	1	1	14	17	1	1	1	1	1	1	1	1	1	1	1	1	1	1	N	1	1	1	1	1	6	1	1	1	1	1	1	1	1	1	1	1	1	1	1	1	1	1	1	1	1	1	1	1	1	1	1	1	1	1	1	1	1	1	1	1	1	16	1	1	1	1	1	6	1	1	1	1	1	1	16	1	1	1	1	1	1	1	1	1	1	1	1	1	1	1	1	1	1	1	1	1	1	1	1	1	1	1	1	1	1	1	1	1	1	1	16	1	1	1	1	1	1	1	1	1	1	1	1	1	1	1	1	1	1	1	1	1	1	1	1	1	1	1	1	1	1	1	1	1	1	6	1	1	16	1	1	1	1	1	1	1	1	1	1	1	1	1	1	14	1	6	1	1	1	1	1	1	1	1	6	1	1	1	1	1	1	1	1	1	1	1	1	1	1	1	1	1	1	1	1	1	1	1	1	1	1	1	1	1	1	1	1	6	1	1	1	1	1	6	1	1-	1	1	1	1	1	1	1	1	1	1	1	1	1	1	1	1	1	1	1	1	1	1	1	15	1	1	1	1	1	6	1	1	1	1	1	1	1	1	1	1	1	1	1	1	6	1	1	1	1	1	1	1	1	1	1	1	1	1	1	1	1	1	1	1	1	1	1	1	1	1	1	1	1	1	1	1	1	1	1	1+	1	1	1	1	1	1	1	1	6	1	1	1	1	1	1	1	1	1	1	1	1	1	1	23	1	1	1	1	1	1	1	1	1	1	1	1	1	1	1	1	1	1	1	1	1	1	1	1	1	1	1	1	1	1	1	1	6	1	1	1	1	1	1	1	1	15	1	1	1	1	1	1	1	1	1	1	1	1	1	1	18	1	1	1	6	5	5	5	6	5	5	5	5	5	6	5	4	5	5	1	6	6	1	1	6	6	5	5	5	1	1	1	1	1	1	1	1	1	1	1	1	1	1	1	1	1	1	1	1	1	15	19	1	1	1	1	1	1	1	14	1	1	1	1	1	1	1	1	1	1	1+	1	1	1	6	1	1	1	1	1	13	1	1	1	1	1	1	1	1	1	1	1	1	1	1	1	1	1	1	1	1	1	1	1	1	1	15	1	1	1	1	1	1	1	1	1	1	1	1	1	1	1	1	1	1	1	1	1	1	1	1	1	16	1	1	1	1	1	1	1	1	6	1	1	1	1	1	1	1	1	1	1	1	1	1	1	1	1	1	1	1	1	1	1	1	1	1	1	6	1	17	1	1	1	1	1	1	1	1	1	1	1	1	1	1	1	1	1	1	1	1	1	1	1	1	6	1	1	1	1	1	1	1	1	1	1	1	1	1	1	16	6	1	1	1	1	1	1	1	1	1	1	1	1	1	1	1	1	1	1	1	1	1	1	1	1	1	1	1	19	1	1	1	1	6	1	1	1	1	1	1	1	1	1	1	1	1	1	1	1	1	3	1	11	1	1	1	1	1	1	1	1	1	1	1	1	1	1	1	1	1	1	1	1	1	1	1	1	1	1	1	1	1	6	1	1	1	1	1	1	1	1	1	1	1	1	1	1	1	1	14	17	15	14	15	4	17	1	1	1	1	1	1	1	1	1	1	N	1	1	1	1	14	1	1	1	1	1	1	1	1	1	1	1	1	1	1	1	1	1	1	1	1	1	1	1	1	1	16	11	13	10	9	13	15	16	12	16	1	1	1	1	1	1	1	6	1	1	1	1	1	1	1	1	1	1	1	1	1	1	1	1	1	1	1	14	14	14	15	13	15	14	17	15+	13	12	14	15	0?	15	16	12	13	18	17	14	15	14	14	1	15	1	1	1	1	1	1	1	1	1	1	1	1	0?	0?	1	1	1	1	1	1	1	1	1	1	1	1	1	1	1	1	1	1	1	1	1	1	1	1	1	1	1	1	1	1	1	1	1	1	1-	1	1	1	1	1	1	1	1	1	1	1	9	1	1	1	1	3	1	1	1	1	1	1	1	1	3	1	1	1	1	1	1	1	1	1	1	1	1	1	1	1	1	1	1	1	1	1	1	1	1	1	1	14	1	1	1	1	1	1	1	1	1	1	1	1	1	1	14	14	5	14	16-	14	13	15	15	11	14	14	16	14	18	14	16	15	13	2	3	10	14	10	10	16	15	15	15	15	15	12	13	14	6	13	14	15	18	1	13	4	1	8	12	10	10	12	11	9	4	1	14	7	1	9	14	11	14	20	6	6	3	6	69	6	6	6	6	6	6	6	6	14	1	5	6	1	6	6	6	5	6	6	6	6	6	6	6	6	6	6	6	6	6	6	6	6	6	6	6	6	6	6	6	6	6	6	6	16	6	17	6	6	6	6	6-	16	3	3	3	3	3	3	3	3	3	3	6	16	3	15	3	3	16	6	6	12	93	6	4	6	6	6	6	6	6	6	5	5	6	6	6	13	6	6	6	5	1	6	6	6	6	3	5	6	6	6	6	15	9	N	12	11	11	10	12	13	17	10	1	12	10	11	13	1	11	1	11	12	2	12-	12	17	12	5	12	13	12	12	12	12	11	11	7	1	12	12	11	1	3	11	12	12	11	12	12	12	12	11	10	16	12	12	12	20	11	10	12	12	11	12	11	10	7	8	10	12	11	12	10	2	11	7	12	9	1	13	12	12	12	12	11	11	11	11	5	12	12	11	12	12	11	11	11	11	10	16	3	10	10	0?	0?	0?	126-	0?	0?	0?	0?	11-	0	0
GCA_000681715.1_ASM68171v1_genomic.fna	2	18	11	11	11	1	29+	1+	157+	12	1	11+	2	10+	198+	172	14+	31+	117+	293+	10	8	182+	12	6	19	188+	64+	11	12	30+	9	17	10	N	0?	236	122	0?	0?	104	0?	0?	222	0?	0?	0?	0?	0?	0?	N	0?	127	0?	148	226+	12+	169+	8+	212+	176+	72	10	10	239+	392	260	341	377	305	219	22	0?	16	17	16	16	285+	212+	13+	191+	240+	71+	14+	20	18	14	186+	225+	14+	155+	0?	101	0?	0?	87	0?	173	116	0?	0?	0?	0?	0?	0?	189	16	148+	18	14	16	13	3+	5	1	29	0?	164	49	108	47	0?	0?	0?	0?	1	1	1	1	1	1+	1	183+	10	0?	0?	0?	109	93	160	0?	0?	0?	0?	0?	0?	0?	0?	111	0?	0?	0?	175	0?	0?	114	1	1+	1	1+	13	1	1	1+	1	6	6	21	5	5	6	4	1	165+	131+	1	1+	224+	1	1	1+	1	1+	1	1+	1	1	1	130+	55+	1+	1	1	1	1	6	1	1+	1	1	1	1	1	1	29	34	20	58	34	23	445	243-	0?	1	1	1	1	20	1	1	1	1	1	19+	180+	1+	1	1	6	1	1	1	1	23	1	1+	1	1+	1	1	1	1	1	1	1	1	192	310	0?	0?	0?	0?	0?	0?	0?	0?	189	N	0?	N	159	104+	1	1	1	1	1	1	33+	1	1	1	1	1	46	6	1	1	0?	109	231	0?	0?	172	73	0?	155	0?	27	0?	91	0?	83	60	0?	0?	0?	0?	60	171	0?	0?	0?	0?	1	155+	1	1	1	16	204+	15	36+	193	0?	0?	192	N	N	14+	1	1	1+	1	1	118+	1	1	1	1	13	1	1+	1	1	1+	25	1	1	16	1	1	1	1	1	1	1	0?	88	0?	111	31	0?	0?	0?	0?	0?	0?	0?	0?	0?	2-	0?	107	0?	37	0?	236+	1	16	1	1	1	1+	28	1	1	1	1	1+	191+	163+	1	1	1+	1	1	1	1+	30+	1	1	143	0?	75	185	1	1+	1	1	1+	135+	117+	17	1	1	1	1	26+	1	1	57+	1	1	1	18	1	6	13	1	1	0?	131	33	182	0?	39	0?	0?	0?	0?	0?	0?	0?	0?	0?	0?	0?	0?	74	0?	N	13	0?	0?	172	20	100	0?	0?	8	28	0?	1	1	1+	1	1	1	1	1	1	0?	1	1+	1	1	1	1+	1	1	1	1	1+	1	1	1	17	1	110+	1	1	1	6	1	1	1	1	1	1	13	15	1	205	217	171	172	181	235	204	224	183	0?	0?	0?	1+	207+	1+	15+	1	277+	1	1	1	1	1	46	42	175	70	156	0?	102	1	40	30	203	144	179+	0?	0?	0?	0?	0?	0?	68-	152	119	0?	52-	190	0?	0?	0?	0?	1	1+	1	1	140+	1	237	121+	15	105	0?	0?	0?	64	0?	0?	0?	182	0?	0?	0?	115	56	0?	0?	0?	69	1+	26	1+	1	1	N	1	121+	17	1	1+	1+	1+	1+	1	1	6	1	1	1	6+	1	0?	57	85-	0?	162	193	170	189	0?	171	0?	0?	1+	1	21	27	24	173	1	1	1	1	1	1	1	68-	65	40	0?	0?	0?	79	22	71+	1+	1	1	1	1	1	1+	1+	1	1+	1	258+	1+	158+	139+	146+	1+	1+	6	1+	21+	167	225	262	N	231	14-	0?	0?	237	169	0?	201	214	189	0?	0?	0?	0?	23	0?	0?	0?	0?	0?	156	0?	161	0?	0?	0?	50	168	163	198	168	103	150	144	171	211	221	1+	1+	1	231	1+	1	17+	0?	0?	37	0?	0?	0?	0?	171	102	0?	134	0?	17	1	1	1+	41	1	152+	114	0?	114-	83-	0?	1	1+	192	0?	0?	0?	0?	0?	0?	119	0?	0?	0?	0?	138	1	1	157	183	N	1+	120	0?	1	1	1	1	165+	6	1	1	1	1	1	1	1	1	102+	1	1	1	20	16	1	1	1	1	1	172	1	1	0?	0?	195	0?	62-	0?	27	1+	1+	1	1	133+	1	1	1	1	1	224+	1	1	262	1	15	1	1	1	1+	1	110+	1+	1+	1	1	55+	24	1	1	1	194	160	175	65	237	91	1+	0?	0?	1	1	1	1+	1	1	1	1	1	1	1	1	1	1	167	0?	0?	78	0?	0?	0?	0?	0?	0?	0?	23-	0?	0?	0?	0?	0?	0?	184	0?	0?	0?	0?	0?	0?	173	156-	168	200	272	0?	214	1	1	238+	144	110	216+	450+	1+	1	96+	80+	1+	103	244-	105	189	139	163	88	102	72	97	57	118	157-	371	156	181	213	165	196	166-	167	217	0?	1-	0?	0?	41	1	1	1	1	1	125	153	129	263	294	173	72	156	155	153	157	158	230	170	123	170	0?	0?	151	209	113	128	245	149	136-	136	221	169	170	0?	101	0?	190	1	121	0?	0?	0?	122	98	0?	0?	0?	0?	143	1	1	1+	1	17	1	170+	273	1+	1	1	1	1	31+	15+	231+	191	1	1	1	1	1	1	1	1	1	13	1	1	1-	1	1	1	1	14	1	1	1	1	1-	161	0?	0?	0?	0?	0?	0?	9+	1	1	1	21+	15	17+	4	13+	17	13	246+	17-	0?	21	1	19	3	94	1	16	1	80	1	1	1	1	1	1	1	1+	1+	1+	1	1	1	1+	1	1	1	1	1	1	1	1	6	1	1	1	1	1	184+	1	1	14	1	0?	197	79	82	0?	192+	1	1	1	1	1	1+	1	N	0?	0?	0?	0?	N	0?	0?	0?	28	53	114	32	0?	0?	39-	0?	0?	0?	0?	0?	0?	0?	0?	1	1	1	1	1	1	1	1	1	1	1	1	6	203+	1	143+	1	0?	132	125	0?	0?	11-	1	1	1	1	1	1	1	1+	1	16	1	1	1	1	1	1+	1	130	0?	1	0?	141	160	192-	190-	145	183	159	217	153	214	167	167	167	1+	1	175	0?	0?	0?	0?	0?	0?	0?	109-	0?	1-	0?	0?	179-	169	121	129-	205	195	159	189	172	194	128	163	190	261	114	189	94	154	151	145-	154	235-	1	0?	0?	0?	0?	0?	0?	1	1	1	1	153+	0?	143	200	239	218	0?	224	198-	176	173	179	173+	225+	300	143	0?	192	237	154-	167+	169+	157+	129+	1+	1+	1+	1+	1	1	195+	1	147+	148+	1+	1	1+	148+	15+	135+	103	N	1	1	1	1	1	1	1	1	1	1	1	1	1	1	0?	0?	0?	0?	0?	0?	0?	0?	0?	139	0?	0?	0?	0?	0?	0?	0?	0?	68-	0?	68-	0?	0?	12	0?	19	1+	1	1	1	1+	1	1	1	17+	1	1	1	1	1	18+	1	1	1	1	1	1	1	1	1	1	1	16	1	1	1	1	1	1	1	1	1	1	1+	1	1	1	15	1	1	1	19	1	1	1	1	1+	1	1	1	1	1	1	1	1	1	1	38	1	130+	16	1	238+	195+	31	53+	99+	18	20	70+	45+	8	2	22	1	14	0?	0?	0?	0?	0?	0?	0?	0?	0?	0?	6	1+	1	1	1	1	1	1+	1	1	1	1	1	1	1	1	1	1	1	1	1	1	1	1	1	168	1	1	0?	0?	0?	0?	133-	0?	219	0?	0?	189	221	188	0?	171-	1	1+	1	1	0?	0?	0?	34	0?	0?	0?	0?	0?	0?	0?	0?	0?	90+	1+	1	152+	1	136	307	19+	1+	1	1	1	0?	183	135	62	143	0?	0?	0?	0?	0?	0?	0?	0?	0?	1	6	1	72	206	71+	1	0?	0?	25-	0?	0?	0?	0?	0?	0?	0?	0?	40	131	0?	13	159	0?	1	100+	1	1	1	1	1	0?	1	180+	1	1	1+	1	1	1	1	1	1	1	195+	213+	1	1	130	162	0?	1+	70+	0?	0?	0?	0?	0?	0?	0?	0?	0?	0?	128	14	0?	0?	57	23	146	110	115-	291	136	0?	0?	151	1+	0?	0?	0?	0?	18-	0?	148	0?	0?	0?	83	305	181	134-	73	133	131	155	120	245	0?	274	0?	153	125	100-	110	0?	0?	0?	63	0?	0?	0?	0?	0?	67	69	1	1	1	1+	132+	6	5+	5	5	6	5+	5	5	5	5	150+	5+	4+	5	5	172	287	277	165+	1	183+	236	188	73	5	1+	1	1	0?	0?	1	1+	207	211	186-	179	224	310	248+	N	1	184+	231+	229+	1+	1	15	0?	35	0?	0?	7	0?	39	0?	0?	0?	0?	0?	157	0?	0?	0?	0?	142	0?	0?	0?	0?	0?	170	1	212+	0?	235	165	151	0?	0?	0?	0?	0?	0?	0?	167	143	174-	0?	104-	133	0?	0?	0?	0?	0?	0?	0?	304	0?	0?	0?	66	0?	0?	0?	0?	0?	0?	0?	0?	158	0?	0?	0?	0?	156	1	1	15	1	1	1+	102+	0?	0?	0?	0?	0?	0?	N	193	0?	0?	0?	0?	0?	0?	0?	121	0?	0?	0?	0?	N	0?	0?	0?	105	125	262	85	0?	0?	0?	0?	135	0?	N	0?	260	0?	0?	0?	6	0?	N	0?	0?	16	0?	0?	N	0?	0?	0?	107	0?	0?	0?	0?	0?	0?	0?	0?	0?	0?	0?	0?	0?	0?	0?	0?	258	126	62	0?	0?	0?	23	0?	0?	0?	0?	0?	84	165	270	6	1	1	1	0?	0?	0?	29	0?	0?	112	0?	0?	0?	0?	0?	11	1	1	1	0?	0?	52	0?	130	0?	51	0?	204	49	41	0?	128	241	44	0?	0?	0?	0?	1	0?	0?	245	146	130	125	130	195	1	1+	26+	1+	125	0?	0?	0?	13	153-	0?	0?	0?	0?	0?	0?	0?	0?	155	0?	36-	10	13	1	1	18	1	1	1+	110+	1	1	1	1	0?	173	189	195	0?	1	1	1	1	1	1	1	0?	0?	0?	0?	0?	0?	0?	0?	0?	0?	2-	0?	0?	0?	127	25+	1+	33+	141+	1	1	1	N	1	35+	1	0?	0?	0?	0?	19	0?	0?	0?	18-	0?	0?	0?	0?	60	N	27	0?	0?	0?	169	0?	64	0?	0?	0?	0?	0?	0?	0?	149	57	0?	0?	171-	0?	157-	0?	0?	27	1	0?	0?	0?	196	220	139	122	0?	0?	0?	0?	0?	0?	0?	0?	0?	0?	0?	112	N	0?	0?	107	209	14	14	14	100	13	15	14	17+	15+	13	12	14+	204+	0?	15	191+	0?	113	18	17	14	15	14	14+	1	213+	141+	1	1	1	1	1	1	1	18+	1+	1	1	1	1-	0?	0?	0?	0?	0?	0?	0?	0?	0?	0?	0?	0?	27	0?	0?	0?	0?	1	1	1	1	1	31+	1	1	1+	1+	1	1	1	1	55+	1	1	1-	1	1	1	1	1	35+	1	1	1	15	1	1	1	1	20+	172+	3+	1	1+	1	132	30	4	29	7	3	1	1+	64+	1	1	1	1+	1	1	1	1+	94	1+	1	1	1+	1	1	N	1	1	1	1	21	1	1	14	N	1	1	1	1	1	1	1	1+	1	0?	0?	0?	0?	202	0?	0?	0?	157	181	155+	204+	15	11	14	14	0?	164	0?	137	16	14	13	2	3	10	14+	10	10	16	15	15	93+	15	15+	147	0?	0?	81-	129	0?	0?	0?	25	0?	58	13	0?	0?	0?	0?	0?	0?	0?	0?	18	14	7	1+	9	42	11	187	314	6	16	3	0?	0?	0?	0?	0?	0?	57	0?	0?	0?	0?	26	0?	0?	1	179+	6	6	5	142+	6	200+	6	6	6	289+	114	0?	183	6	6	6	6	6	6	6	210	218	0?	173+	17+	6	6	123+	215+	212+	189	0?	207	180	0?	0?	0?	0?	172	113	197	258	244	15+	17+	0?	101	250	177-	144	144	156	180	146	295	0?	0?	0?	0?	0?	145	101	0?	201	343	6	6	6	6	36+	154+	111+	6	6	13	17	6	6	0?	0?	0?	209	0?	0?	150	0?	119	0?	0?	0?	0?	52	N	132+	163	0?	65	0?	0?	0?	0?	21	0?	0?	165-	205	134	170	0?	0?	231	82	0?	12	12	12	5	12	13	120+	16+	12	20	11+	11	7	8+	12	12	11+	1+	3	11	12	0?	0?	212	185	201	0?	201	132	191	199	0?	0?	195	136	0?	0?	0?	193	0?	0?	76	7	51	67-	0?	182	0?	0?	9	115	N	172	117	27	131	173	0?	154	0?	0?	133	0?	142	42	0?	0?	0?	228	0?	0?	156	177	275	207	210	3	211	10	153+	180+	12	50+	12	130+	12	18	11	0	0
GCA_000682195.1_ASM68219v1_genomic.fna	2	18	11	11	11	1	1	1	12	N	1	11	2	10	12	11	12	12	11	27	10	8	12+	12	6	19	19	10	16	17	2	13	16	14	6	8	19	17	19	16	14	17	20	20	19	19	22	9	5	5	12	12	11	5	11	12	12	12	8	25	21	72	10	10	21	29	24	27	26	20	22	22	23	16	17	16	16	19	13	13	18	18	8	14	19	13	14	14	15	14	18	16	13	8	13	12	15	18	5-	13	15	14	12	11	13	17	16	16	17	15	16	13	3	5	1	8	1	1	1	1	1	1	1	1	1	1	1	1	1	1	1	1	1	10	15	1	1	1	1	1	1	1	1	1	1	1	2	1	1	1	1	21	1	1	1	1	1	1	1	1	13	1	1	1	1	6	6	5	5	5	6	4	1	1	1	1	1	1	1	1	1	1	1	1	1	1	1	1	1	1	1	1	1	1	1	6	1	1	1	1	1	1	1	1	1	1	1	1	1	1	1	1	1	1	1	1	1	20	1	1	1	1	1	1	1	1	1	1	6	1	1	1	1	1	1	1	1	1	1	1	1	1	1	1	1	1	1	1	13	1	1	15	1	1	1	1	1	1	1	1	1	1	1	1	306	1	1	1	1	1	1	1	1	1	1	6	1	1	1	1	1	1	1	1	1	17	1	1	1	1	1	1	1	1	1	1	1	15	1	1	1	1	1	1	1	1	1	1	1	1	1	1	1	1	1	1	1	1	1	1	1	1	1	1	1	1	1	1	1	1	13	1	1	1	1	1	1	1	1	1	1	1	1	1	1	1	1	1	1	1	1	1	1	1	1	1	1	1	1	1	1	1	1	10	1	1	1	18	1	1	1	1	1	1	1	1	1	1	1	1	1	1	1	1	1	1	1	1	1	1	1	1	1	1	1	6	1	1	1	1	1	1	1	17	1	1	1	1	1	1	1	1	1	1	1	1	1	6	13	1	1	1-	1	1	1	1	1	1	1	1	1	164	1	1	1	1	1	1	1	1	1	1	1	1	1	1	1	1	1	1	1	1	1	1	1	1	1	1	1	1	1	1	1	1	1	1	1	1	1	1	1	1	13	1	1	1	1	1	1	1	1	1	1	6	1	1	1	1	1	1	1	15	1	1	1	1	1	1	1	1	1	1	1	1	1	1	1	1	15	1	1	1	1	1	1	1	1	1	1	1	1	1	1	1	1	1	1	1	1	1	1	1	1	1	1	1	1	1	1	3	1	1	1	1	1	1	1	1	1	1	1	1	1	15	1	1	1	1	1	1	1	17	1	1	1	1	1	1	1	1	1	1	1	1	1	1	1	1	1	6	1	1	1	1	1	1	1	1	6	1	1	1	6	1	22-	1	1	1	1	1	16	1	1	1	1	1	1	1	1	1	1	1	1	1	1	1	1	1	1	1	1	1	1	1	1	1	1	1	1	1	1	1	1	1	1	1	1	1	1	1	1	1	1	1	1	1	6	1	1	1	17	25	15	16	1	16	21	17	15	17	15	15	16	16	18	15	14	1	15	16	2	10	1	1	1	1	1	1	1	1	1	1	1	1	1	1	1	1	1	1	1	1	1	1	1	1	17	1	6	1	1	1	1	1	1	1	1	1	1	1	1	1	1	1	1	1	1	1	1	1	1	1	1	1	1	1	1	1	1	1	1	1	1	1	1	1	1	1	1	1	1	31	1	1	1	1	1	1	1	6	1	1	1	1	1	1	1	1	1	1	1	1	1	15	1	1	1	1	1	1	0?	0?	1	16	1	1	1	1	1	1	1	1	1	1	1	16	1	1	1	1	1	1	6	1	1	1	1	1	1	1	1	1	1	1	1	1	1	1	1	1	1	1	1	1	6	1	1	1	13+	1	1	1	1	1	1	1	1	1	1	1	17	1	1	1	1	1	1	1	57	1	1	1	1	1	1	1	1	1	1	1	1	1	1	1	1	1	1	1	1	1	16	1	1	1	1	1	1	1	1	1	1	6	1	1	1	1	1	1	1	1	1	1	31	1	1	1	1	1	1	1	1	1	1	1	1	1	1	1	1	1	1	1	1	1	1	1	1	1	1	1	1	1	1	1	1	1	0?	0?	0?	0?	0?	0?	0?	0?	0?	0?	0?	0?	0?	0?	0?	0?	0?	0?	0?	0?	0?	0?	0?	11-	0?	0?	1	1	1	1	1	1	1	1	1	1	1	1	1	1	1	1	1	1	1	6	1	1	1	1	1	1	1	1	1	1	1	1	1	1	1	1	1	1	13	1	1	0?	0?	0?	0?	0?	0?	68-	0?	0?	0?	1	1	1	1	1	1	1	13	1	1	1	1	1	1	1	1	1	1	1	1	1	1	1	1	1	1	1	1	1	1	1	1	1	1	1	1	1	1	1	1	1	1	1	1	1	1	1	1	1	1	1	1	1	6	1	1	1	1	1	1	1	1	14	1	1	1	1	1	1	N	1	1	1	1	1	1	1	1	1	1	10	1	1	1	1	1	1	1	1	1	1	1	1	1	1	1	1	1	1	8	1	1	1	1	1	1	1	1	1	1	1	1	1	6	1	1	1	1	1	1	1	1	1	1	1	1	1	1	1	1	1	1	1	16	1	1	1	1	1	1	1	1	1	1	1-	1	1	1	1	1	1	1	1	1	1	1	1	1	1	1	1	1	1	1	1	1	1	1	1	1	1	1	1	438+	6	1	1	1	1	1	1	1	1	1	1	N	25	1	1	1	1	1	1	1	1	1	1	1	1	1	1	16	1	1	1	1	21	17	1	1	1	1	1	1	1	1	0?	0?	1	1	361	1	N	1	1	1	1	1	6	1	1	1	1	1	1	1	1	1	1	1	1	1	1	1	1	1	1	1-	1	1	1	1	1	1	1	1	1	1	1	1	1	1	1	1	1	16	1	1	1	1	1	6	1	1	1	1	1	1	16	1	1	1	1	1	1	1	1	1	1	1	1	1	1	1	1	1	1	1	1	1	1	1	1	1	1	1	1	1	1	1	1	1	1	1	16	1	1	1	1	1	1	1	1	1	1	1	1	1	1	1	1	1	1	19	1	1	1	1	1	1	1	1	1	1	1	1	1	1	1	6	1	1	16	1	1	1	31	5	7	18	20	4	1	8	2	22	1	14	1	6	1	1	1	1	1	1	1	1	6	1	1	1	1	230	1	1	1	1	1	1	1	1	1	1	1	1	1	1	1	1	1	1	1	1	1	1	1	1	1	1	1	6	17	1	1	1	1	6	1	1-	1	1	1	1	1	1	1	1	1	1	1	1	1	1	1	1	1	1	1	1	1	1	1	15	1	1	1	1	1	6	1	1	1	1	1	1	1	1	1	1	1	1	1	1	6	1	1	28	1	1	1	1	1	1	1	1	1	1	1	1	1	1	1	1	1	1	1	1	1	1	1	1	1	1	250	1	1	1	1	1+	1	1	1	1	1	1	1	1	6	1	1	1	1	1	1	1	1	1	1	1	1	1	1	17	1	1	1	1	1	1	1	1	1	1	1	1	1	1	1	1	1	1	1	1	1	1	1	1	1	1	1	1	1	1	1	1	6	1	1	1	1	1	1	1	1	15	1	1	1	1	1	1	1	15	1	1	1	1	1	1	1	1	1	1	6	5	5	5	6	5	5	5	5	5	180	5	4	5	5	1	6	6	1	1	6	6	5	5	5	1	1	1	1	1	1	1	1	1	1	1	1	1	1	1	1	1	1	1	1	1	15	19	1	1	1	1	1	1	1	14	1	1	1	1	1	1	1	1	1	1	1+	1	1	1	6	1	1	1	19	1	1	1	1	1	1	1	1	1	1	1	1	1	1	1	1	1	1	1	1	1	1	30	1	1	1	1	15	1	1	1	1	1	24	1	1	1	1	1	1	1	1	1	1	1	1	1	1	1	1	1	1	1	1	1	1	1	1	1	1	1	1	6	1	1	1	1	1	1	1	1	1	1	1	1	15	1	1	1	1	1	1	1	1	1	1	1	1	1	6	1	17	1	1	1	1	1	1	1	1	1	1	1	1	1	1	1	1	1	1	1	1	1	1	1	1	6	1	1	1	1	1	1	1	1	1	1	1	1	1	1	16	6	1	1	1	1	1	1	1	1	1	1	1	1	1	1	1	1	1	1	1	1	1	1	1	1	1	1	1	19	1	1	1	16	6	1	1	1	1	1	1	1	1	1	1	1	1	1	1	1	1	3	1	11	1	1	1	1	1	1	1	1	1	1	16	1	1	1	1	1	1	1	1	1	1	1	1	1	1	1	1	1	1	6	1	1	1	1	1	1	1	1	1	1	1	1	1	1	1	1	14	17	15	14	15	4	17	1	1	1	1	1	1	1	1	1	1	N	1	1	1	1	1	1	1	19	4	1	1	1	1	1	1	16	1	1	1	1	1	1	1	1	1	1	1	1	1	1	16	11	13	10	9	13	15	16	12	16	1	1	1	1	1	1	1	6	1	1	1	1	1	1	1	1	1	1	1	1	1	1	16	1	1	1	1	14	14	14	15	13	15	14	17	15+	13	12	14	15	0?	15	16	12	13	18	17	14	15	14	14	1	15	1	1	1	1	1	1	1	1	1	1	1	1	1	1-	1	1	1	1	1	1	1	1	1	1	1	1	7	1	1	1	1	1	1	1	1	1	1	1	1	1	1	1	1	1	1	1	1	1	1-	1	1	1	1	1	1	1	1	1	1	1	1	1	1	1	1	3	1	1	1	1	1	1	1	1	3	1	1	1	1	1	1	1	1	1	1	1	1	1	1	1	1	1	1	1	1	1	1	1	1	1	1	14	1	1	1	1	1	1	1	1	1	1	12	1	1	1	14	14	5	14	16-	14	13	15	15	11	14	14	16	14	18	14	16	15	13	2	3	10	14	10	10	16	15	15	15	15	15	12	13	174	6	13	14	15	18	1	13	4	1	8	12	10	10	12	11	9	4	1	14	7	1	9	42	11	14-	20	6	6	3	6	6	6	6	19	6	6	6	6	6	14	1	5	6	1	6	6	6	5	6	6	6	6	6	6	6	6	6	6	6	6	6	6	6	6	6	6	6	6	6	6	6	6	14	6	6	16	6	16	6	6	6	6	284-	17	15	17	17	16	15	17	3	3	3	3	21	16	3	15	3	297	16	6	6	12	6	6	4	6	6	6	6	6	17	6	5	5	6	6	6	13	6	6	6	5	1	6	265	3	3	3	3	3	3	3	3	3	1	3	12	11	11	10	12	13	17	10	1	12	10	11	13	1	11	1	11	12	2	12-	12	12	12	5	12	13	12	12	12	12	11	11	7	1	12	12	11	1	3	11	12	12	11	12	12	12	24	11	10	16	12	12	12	20	11	10	12	12	11	12	11	10	7	8	10	12	11	12	10	2	11	7	12	9	1	13	12	12	12	12	11	11	11	11	5	12	12	11	12	12	11	11	11	16	10	16	3	10	10	12	12	12	6	12	12	12	12	11	0	0
GCA_000682315.1_ASM68231v1_genomic.fna	2	18	11	11	11	1	1	1	12	12	1	11	2	0?	0?	0?	0?	0?	0?	0?	0?	0?	0?	0?	0?	0?	0?	10	16	17	2	13	16	14	6	8	19	17	19	16	14	17	20	20	19	19	28	9	5	5	12	12	11	5	11	12	12	12	8	25	21	72	10	10	21	27	24	27	26	20	22	22	23	16	17	16	16	19	13	13	18	18	8	14	19	13	14	14	15	14	18	16	13	8	13	12	15	18	5-	13	15	14	12	11	13	17	16	16	17	15	16	13	3	5	1	1	1	1	1	1	1	1	1	1	1	1	1	1	1	1	1	1	1	10	15	1	1	1	1	1	1	1	1	1	1	1	2	1	1	1	1	30	1	1	1	1	1	1	1	1	13	1	1	1	1	6	6	5	5	5	6	4	1	1	1	1	1	1	1	1	1	1	1	1	1	1	1	1	1	1	1	1	1	1	1	6	1	1	1	1	1	1	1	1	1	1	1	1	1	1	1	1	1	1	1	1	1	20	1	1	1	1	1	1	1	1	1	1	6	1	1	1	1	1	1	1	1	1	1	1	1	1	1	1	1	1	1	1	1	1	1	1	1	1	1	1	1	21	1	1	1	1	1	1	1	1	1	1	1	1	1	1	1	1	1	6	1	1	1	1	1	1	1	1	1	1	1	1	1	1	1	1	1	1	1	1	1	103	1	1	1	1	1	1	1	1	1	1	1	1	1	1	1	21	1	1	1	1	1	1	1	1	1	1	1	1	1	1	1	1	13	1	1	1	1	1	1	1	1	1	1	1	1	1	1	1	1	1	1	1	1	1	1	1	1	1	1	1	1	1	1	1	1	10	1	1	1	1	1	1	1	1	1	1	1	1	1	1	1	1	1	1	1	1	1	1	1	1	1	1	1	1	1	1	1	6	1	1	1	1	1	1	1	17	1	1	1	1	1	1	1	1	1	1	1	1	1	6	13	1	1	1-	1	1	1	1	1	1	1	1	1	1	1	1	1	1	1	1	1	1	1	1	1	1	1	1	1	1	1	1	1	1	1	1	1	1	1	1	91	1	1	1	1	1-	1	1	1	1	1	1	1	1	1	1	1	1	1	1	1	1	1	1	1	6	15	1	1	1	1	1	1	15	1	1	1	1	1	1	25	1	1	1	1	1	1	1	1	1	15	1	1	1	1	1	1	1	1	1	1	1	1	1	1	1	1	1	1	1	1	1	1	1	1	1	1	1	1	1	1	3	1	1	1	1	1	1	1	1	1	1	1	1	1	1	1	1	1	1	1	1	1	1	1	1	1	1	1	1	1	1	1	1	1	1	1	1	1	1	1	6	1	1	1	1	1	1	1	1	6	1	1	1	6	1	22	1	1	1	1	1	16	1	1	1	1	1	1	1	1	1	1	1	1	1	1	1	1	1	1	1	1	1	1	1	1	1	1	1	1	1	1	1	1	1	1	1	1	1	1	1	1	1	1	1	1	101	6	1	1	1	16	25	15	16	1	16	20	17	15	17	15	15	16	16-	18	15	14	1	15	16	2	10	1	1	1	1	1	1	1	1	1	1	1	1	1	1	1	1	1	1	1	1	1	1	1	1	6	1	6	1	1	1	1	1	1	1	1	1	1	1	1	1	1	1	1	1	1	1	1	1	1	1	1	1	1	1	1	1	1	1	1	1	1	1	1	1	1	1	1	1	1	1	1	1	1	1	1	1	1	6	1	1	1	1	1	1	1	1	1	1	1	1	1	15	1	1	1	1	1	1	1	1	1	16	1	1	1	1	1	1	1	1	1	1	1	1	1	1	1	1	1	1	6	1	1	1	1	1	1	1	1	1	1	1	1	1	1	1	1	1	1	1	1	1	6	1	1	1	13+	0?	0?	0?	1	1	1	1	1	1	1	1	1	1	1	1	1	1	1	1	1	1	1	1	1	1	1	1	1	1	1	1	1	1	1	1	1	1	1	1	1	1	1	1	1	1	1	1	1	1	1	1	1	18	1	1	1	1	1	1	1	1	1	1	6	1	1	1	1	1	1	1	1	1	1	1	1	1	1	1	1	1	1	9	1	1	1	1	1	1	1	1	1	1	1	1	1	1	1	1	1	1	1	1	1	1	1	1	1	1	1	1	1	1	1	1	1	1	1	1	1	1	1	1	1	1	1	1	1	1	1	1	1	19	1	1	1	1	1	1	1	1	1	6	1	1	1	1	1	1	1	1	1	1	1	1	1	1	1	1	1	1	1	1	1	1-	1	1	1	1	1	1	1	1	1	1	1	1	1	1	1	1	13	1	1	1	1	1	1	1	1	1	1	1	1	1	1	1	1	1	1	1	1	1	1	1	1	1	1	1	1	1	1	1	1	1	1	1	1	1	1	1	1	1	1	1	1	1	6	1	1	1	1	1	1	1	1	14	1	1	1	1	1	1	N	1	1	1	1	1	1	1	1	1	1	10	1	1	1	1	1	1	1	1	1	1	1	1	1	1	1	1	1	1	8	1	1	1	1	1	18	1	1	1	1	1	1	1	24	1	1	1	1	1	1	1	1	1	1	1	1	1	1	1	1	1	1	1	1	1	1	1	1	1	1	1	1	1	1	1	1	1	1	1	1	1	1	1	1	1	1	1	1	1	1	1	1	1	1	1	1	1	1	1	1	1	1	1	438+	6	1	1	1	1	1	1	1	1	1	1	N	1	1	1	1	1	1	1	1	1	1	1	1	1	1	1	16	1	1	1	1	14	17-	1	1	N	1	1	1	1	1	1	1	1	1	1	1	N	1	1	1	1	1	6	1	1	1	1	1	1	1	1	1	1	1	1	1	1	1	1	1	1	1	1	1	1	1	1	1	1	1	1	1	1	1	1	1	1	1	1	16	1	1	1	1	1	6	1	1	1	1	1	1	16	1	1	1	1	1	1	1	1	1	1	1	1	1	1	1	1	1	1	1	1	1	1	1	1	1	1	1	1	1	1	1	1	1	1	1	16	1	1	1	1	1	1	1	1	1	1	1	1	1	1	1	1	1	1	1	1	1	1	1	1	1	1	1	1	1	1	1	1	1	1	6	1	1	16	1	1	19	28	1	4-	10	9	8	1	10	8	10	235+	14	1	6	1	1	1	1	1	1	1	1	6	1	1	1	1	1	1	1	1	1	1	1	1	1	1	1	1	1	1	1	1	1	1	1	1	1	1	1	1	1	1	1	1	6	1	1	1	1	1	6	1	1-	1	1	1	1	1	1	1	1	1	1	1-	1	1	1	1	1	1	1	1	1	1	1	1	15	1	1	1	1	1	6	1	1	1	1	1	1	1	1	1	1	1	1	1	1	6	1	1	1	1	1	1	1	1	1	1	1	1	1	1	1	1	1	1	1	1	1	1	1	1	1	172-	1	1	1	1	1	1	1	1	1+	1	1	1	1	1	1	1	1	6	1	1	1	1	1	1	1	1	1	1	1	1	1	1	1	1	1	1	1	1	1	1	1	1	1	1	1	1	1	1	1	1	1	1	1	1	1	1	1	1	1	1	1	1	1	1	1	6	1	1	1	1	1	1	1	1	15	1	1	1	1	1	1	1	1	1	1	1	1	1	1	1	1	1	1	6	5	5	5	6	5	5	5	5	5	6	5	4	5	5	1	6	6	1	1	6	6	5	5	5	1	1	1	1	1	94	1	116	1	1	1	1	1	1	1	1	1	1	1	1	1	15	19	1	1	1	1	1	1	1	14	1	1	1	1	1	1	1	1	1	17	1+	1	1	1	6	1	1	1	19	1	1	1	1	1	1	17	1	1	1	1	1	1	1	1	1	1	1	1	1	1	1	1	1	1	1	1	15	1	1	1	1	1	24	1	1	1	1	1	1	1	1	1	1	1	1	1	1	1	1	1	1	1	1	1	1	1	1	97	1	1	1	6	1	1	1	1	1	1	1	1	1	1	1	1	1	1	1	1	1	1	1	1	1	1	1	1	1	1	6	1	17	1	1	1	1	1	1	1	1	1	1	1	1	1	1	1	1	1	1	1	1	1	1	1	1	6	1	1	1	1	1	93	1	1	1	1	1	1	1	1	16	6	1	1	1	1	1	1	1	22	1	1	1	1	1	1	1	1	1	1	1	1	1	1	1	1	1	1	1	19	1	1	1	16	6	1	1	1	1	1	97	1	1	1	1	1	1	1	1	1	1	3	1	11	1	1	1	1	1	1	1	1	1	1	1	1	1	1	1	1	1	1	1	1	1	1	24	1	1	1	1	1	1	138	1	1	1	1	1	1	1	1	1	1	1	1	1	1	1	1	14	17	15	14	15	4	17	1	1	1	1	1	1	1	1	1	1	1	1	1	1	1	1	1	1	1	1	1	1	1	1	1	1	1	1	1	1	1	1	1	1	1	1	1	1	1	1	1	16	1	1	1	1	1	1	1	1	19	1	1	1	1	1	1	1	6	1	1	1	1	1	1	1	1	1	1	1	1	1	1	1	1	1	1	1	14	14	14	15	13	15	14	17	15+	13	12	14	15	0?	15	16	12	13	18	17	14	15	14	14	1	15	1	1	1	1	1	1	1	1	1	1	1	1	1	1-	1	1	1	1	1	1	1	1	1	1	1	1	1	1	1	1	1	1	15	1	1	1	1	1	1	1	1	1	1	1	1	1	1	1	1	1	1	1	1	1	1	1	1	1	1	1	1	1	1	1	1	3	1	1	1	1	1	1	1	1	3	1	1	1	1	1	1	1	1	1	1	1	1	1	1	1	1	1	1	1	1	1	1	1	1	1	1	1	1	1	1	1	1	1	1	1	1	1	1	1	1	1	14	14	5	14	16	14	13	15	15	11	14	14	16	14	18	14	16	15	13	2	3	10	14	10	10	16	15	15	15	15	15	12	13	14	6	13	14	15	18	1	13	4	1	8	12	10	10	12	11	9	4	1	14	7	1	9	14	11	14	20	6	6	3	6	6	6	6	6	6	6	6	6	6	14	1	5	6	1	6	6	6	5	6	6	6	6	6	6-	6	6	6	6	6	6	6	6	6	6	6	6	6	6	6	6	6	6	6	6	6	16	6	17	6	6	6	6	6-	16	3	3	3	3	3	3	3	3	3	3	6	16	3	15	3	3	116	6	6	12	6	6	4	6	6	6	6	6	6	6	5	5	6	6	6	13	6	6	6	5	1	6	6	6	6	3	88	6	6	6	6	15	9	N	12	11	11	10	12	13	17	10	1	12	10	11	13	1	11	1	11	12	2	12-	12	12	12	5	12	13	12	12	12	12	11	11	7	1	12	12	11	1	3	11	12	12	11	12	12	12	12	11	10	16	12	12	12	20	11	10	12	12	N	12	11	10	7	8	10	12	11	12	10	2	11	7	12	9	1	13	12	12	12	12	11	11	11	11	5	12	12	11	12	12	11	11	11	11	10	16	3	10	10	12	12	12	6	12	12	12	12	11	0	0
GCA_000682635.1_ASM68263v1_genomic.fna	10	56	42	15	40	1	1	1	16	17	2	15	1	13	16	39	16	16	15	18	11	2	16	45	10	17	16	2	14	15	2	3	14	5	1	26	16	14	16	14	7	14	42	17	N	45	52	13	6	16	18	38	16	12	13	15	15	47	3	5	5	4	14	5	45	14	14	13	12	50	13+	46	11	11	11	12	12	13	13	13	13	13	8	25	14	66	14	21	15	14	18	6	5	6	5	26	6	6	6	5	6	5	6	5	5	6	6	6+	5	6	6	6	3	5	1	1	2	11	2	6	4	6	31	6	11	27	13	10	43	12	7	10	12	N	12	12	9	9	1+	33	54	9	29+	11	12	203+	11	40	8	11	11	6	6	6	5	6	1	1	1	1	13	1	1	1	1	6	6	68	5	5	6	4	1	1	1	1	1	43	1	1	1	1	1	1	1	1	1	1	1	1	1	1	1	1	1	6	1	1	1	1	1	1	1	1	1	1	1	1	1	1	1	28	1	1	1	1	1	20	1	1	1	1	1	1	1	1	1	1	6	21	1	1	1	1	1	1	1	38	1	1	1	1	1	1	1	1	1	36	1	1	1	16	1	1	40	1	1	1	1	1	1	1	1	1	1	1	1	1	1	1	1	1	1	1	1	6	1	1	1	1	1	1	1	1	1	1	1	1	1	14	1	1	1	1	1	1	1	1	1	1	1	1	1	1	1	1	1	1	1	1	1	1	1	1	1	1	1	1	18	1	1	1	1	1	1	1	1	16	1	1	1	1	1	1	1	1	18	1	1	44	1	1	1	1	1	1	1	1	1	1	16	1	1	38	1	1	1	1	1	1	1	2	1	1	1	1	1	18	18	16	1	1	1	18	16	1	1	1	1	1	1	1	1	1	1	1	1	1	1	1	1	1	1	1	1	6	16	1	1	1	1	1	1	1	1	1	1	1	1	1	1	1	1	1	1	18	1	6	13	1	1	1	1	1	1	1	1	1	1	1	1	15	1	1	1	1	1	1	1	1	1	1	1	1	1	1	1	1	1	1	1	1	1	1	1	1	1	1	1	34	1	1	1	1	1	1	1	1	1	1	1	15	1	1	1	1	1	61	1	1	37	1	1	6	15	1	1	1	15	1	13	1	1	1	1	1	1	1	N	1	1	1	1	1	1	1	1	1	1	1	1	1	1	1	1	1	1	1	1	14	1	1	1	1	1	1	1	14	6	1	1	1	1	1	58	1	1	1	13	3	1	1	1	1	1	1	1	1	1	1	1	26	1	1	1	1	1	1	1	1	1	25	1	16	1	1	1	1	1	1	1	4	1	1	1	1	1	67	1	6	1	1	1	1	1	1	1	1	6	1	1	1	6	1	18	1	1	23	1	1	16	1	1	1	1	1	1	1	1	1	1	1	1	1	1	1	1	1	1	1	1	1	1	1	1	1	1	1	1	17	1	1	1	1	1	1	1	1	1	1	43	1	1	1	1	1	6	1	1	8	8	13	41	14	13+	9	41	9	8	8	39	16	19	17	9	16	15	2	17	42	12	1	45	16	6	15	10+	5+	5	11	17	18	19	1	1	1	1	1	1	1	1	1	1	15	1	17	6	1	6	1	1	1	1	1	1	1	1	1	1	1	1	21	1	1	1	1	1	1	1	1	20	1	1	1	1	1	1	1	1	1	1	1	1	1	1	1	1	1	1	1	1	1	1	1	1	1	1	1	1	6	1	1	1	1	1	1	1	1	1	1	1	1	1	1	1	1	1	1	1	45	1+	1	1	22	1	1	1	14	1	1	1	1	1	1	1	1	1	1	1	1	1	1	6	1	1	1	1	1	1	1	1	1	1	1	11	1	18	1	1	1	1	1	1	1	6	1	1	30	1	1	1	1	1	1	1	1	36	1	1	1	1	1	1	1	1	1	1	1	1	1-	1	1	1	17	1	1	1	1	1	1	1	1	1	1	1	1	1	27	46	1	36	1	64	16	1	1	1	1	1	1	1	6	1	1	1	1	1	15	1	1	1	1	19	1	1	1	1	1	15	1	21	1	1	1	1	1	1	1	16	1	1	1	1	1	1	1	1	1	1	1	1	1	1	1	13	1	1	1	1	1	1	1	1	1	1	1	1	1	1	1	1	1	1	1	1	1	1	1	86	23	1	1	1	1	1	1	1	1	1	1	1	1	1	1	1	1	1	1	1	1	1	138-	1	1	1	16	1	1	1	1	1	1	15	1	1	1	1	1	1	1	1	1	1	1-	1	1	N	1	1	1	1	1	10	1	1	1	1	32	1	1	13	1	1	1	1	1	1	1	1	1	1	1	1	1	31	1	1	1	1	1	1	1	1	1	16	1	1	1	1	1	1	1	1	1	1	1	1	1	47	1	1	1	1	1	1	1	6	1	1	1	1	1	1	1	1	1	1	1	1	1	1	1	1	1	1	1	1	1	1	1	1	1	1	1	1	5	1	1	1	1	1	1	1	1	1	1	1	13	1	1	1	1	8	1	1	1	1	1	1	15	1	1	1	1	1	1	6	1	1	1	1	22	1	29	1	1	1	1	1	1	1	1	1	12	1	1	1	1	1	1	1	1	1	1	1	1	1	1	1	1	1	1	1	1	1	16	1	1	1	1	1	1	1	1	1	1	1	85	1	1	1	1	1	1	1	1	438+	6	1	1	1	1	1	1	1	1	1	1	N	30	1	1	1	1	1	1	1	1	1	1	1	1	1	1	1	1	1	1	1	1	1	1	1	1	1	1	1	1	1	15	43	1	1	1	1	35	1	1	1	1	1	6	1	1	1	1	1	1	1	1	1	1	1	1	1	1	1	1	1	1	1	1	1	1	1	1	16	1	1	23	1	1	1	1	1	1	1	1	1	1	1	1	1	1	6	1	1	1	1	13	1	1	1	1	1	1	1	1	1	1	1	1	1	1	1	1	1	1	17	1	1	1	1	1	1	1	1	1	1	1	1	1	1	1	1	1	1	1	1	1	1	1	1	1	31	1	1	1	1	1	1	1	15	1	1	1	1	1	1	1	1	1	1	34	1	1	36	1	1	1	1	1	6	1	1	1	1	60	1	15	1	1	1	1	12	2	1	1	1	1	1	1	6	1	1	1	1	1	1	1	1	6	1	24	1	1	1	1	1	1	1	1	1	1	1	1	1	1	35	1	1	1	1	1	1	1	1	1	1	22	1	1	1	1	6	1	1	1	1	1	6	1	1	1	1	1	1	1	17	1	1	1	1	1	1	1	1	1	1	1	1	1	1	1	1	1	73	1	29	1	1	1	6	1	1	1	1	1	1	1	1	1	1	1	1	1	1	17	1	1	1	1	5	1	1	1	1	1	1	1	1	77	1	1	1	1	1	1	1	15	1	1	1	1	1	1	1	1	1	1	1	1	1+	1	1	1	1	1	1	1	1	6	1	1	1	1	1	1	1	1	1	13	1	1	1	1	17	1	1	1	1	1	1	1	1	32	1	1	31	1	1	1	1	1	1	1	1	1	1	34	1	1	1	1	1	6	1	1	1	6	1	18	1-	1	1	1	1	1	1	1	1	1	1	1	1	1	1	1	1	1	1	1	1	20	1	1	1	6	5	5	5	6	46	5	5	5	5	6	5	4	5	5	1	6	6	1	1	6	24	5	5	5	1	15	1	1	1	1	15	1	1	1	1	1	1	1	54	1	1	1	1	1	1	1	1	1	1	1	1	1	1	1	1	1	1	1	1	1	1	1	1	1	1	1+	1	17	1	6	1	1	1	19	1	1	1	1	1	1	18	1	17	1	1	1	1	1	1	1	1	1	1	1	1	1	56	1	1	1	1	1	1	1	1	1	1	1	1	1	1	15	1	1	1	1	1	1	1	1	1	1	21	1	1	1	1	1	1	1	1	1	1	1	16	1	6	1	1	1	1	1	1	15	1	1	1	1	1	1	1	1	1	1	1	1	1	1	1	1	1	1	1	6	1	1	1	1	1	1	1	1	1	1	1	1	1	1	1	1	1	17	1	1	1	1	16	1	1	1	6	1	1	1	1	1	1	1	1	1	16	1	1	1	1	32	6	1	1	1	1	1	1	1	1	1	1	1	1	1	1	1	1	1	1	1	1	1	1	1	1	1	1	1	1	1	1	1	16	6	1	1	1	1	1	1	1	1	1	1	1	1	1	1	1	1	1	1	1	1	1	1	1	1	1	1	1	1	1	1	1	1	1	1	1	1	1	1	1	18	1	1	1	1	1	1	1	1	6	1	1	1	53	1	1	1	1	1	1	1	1	1	1	1	1	1	41	1	1	1	1	1	1	1	1	1	1	1	1	1	1	1	1	1	1	1	1	1	1	1	1	1	1	1	1	1	1	1	49	1	1	1	1	1	1	1	1	1	1	1	1	1	1	1	1	1	1	1	1	1	1	1	1	1	1	1	1	1	1	1	6	1	1	1	1	1	1	1	1	1	1	1	1	1	1	16	1	1	1	1	1	1	1	1	1	42	1	6	1	1	1	1+	1	1	1	45	4	1	1	1	29+	1	1	1	1	1	1	1	1	1	1	1	1	1	1	1	1	1	1	1	1	1	1	1	1	1	1	1	1	28	1	1	1	1	1	1	1	1	1	1	1	1	1	1	1	1	1	1	1	1	1	1	1	1	1	24	1	1	1	16	1	1	1	1	15	1	1	1	1	1	1	3	1	1	1	1	1	1	1	1	3	1	1	1	1	1	1	1	1	1	1	1	13	1	1	1	1	1	1	1	1	1	1	1	1	1	1	1	1	1	10	1	1	1	1	1	1	1	12	1	1	1	1	1	1	1	1	1	1	1	32	1	1	1	1	37	1	1	1	1	1	27	3	29	1	1	1	1	1	1	1	1	1	1	33	1	1	39	1	6	72	1	1	1	1	29	47	6	6	6	6	6	9	2	6	1	2	5	1	1	1	1	1	1	1	1	13	1	1	58	65+	1	3	44	1	58	1	1	1	1	1	1	1	1	1	1	1	1	1	1	1	1	1	1	1	33	1	1	1	1	1	1	1	236+	1	1	1	1	1	1	1	1	1	1	1	1	1	1	1	1	1	1	1	41	41	1	1	1	1	1	1	1	1	1	1	13	1	1	1	1	1	1	1	1	1	1	1	38	1	1	1	1	1	1	1	14	1	1	38	1	1	1	1	1	1	37	1	1	41	1	1	41	1	48	1+	1	1	30	1	1	1	1	1	1	1	1	1	1	N	18	1	58	1	1	1	13	1	1	1	41	1	1	50	54	15+	1	1	1	59	45	1	1	1	1	1	1	1+	51	1	1+	144	1	1	1	1	1	48	1	11+	1+	1	1	1	13	37	1	1	1	1	1	43	1	10	1	30	1	44	1	1	1	1	1	37	1	12	1	1	1	1	50	1	1	59	1	1	1	1	60	1	43	3+	24	13	40	17	15	5	16	16	40	17	15	0	0
GCA_000784715.1_ASM78471v1_genomic.fna	0?	0?	0?	0?	0?	2-	0?	2-	0?	0?	2-	0?	1-	0?	0?	0?	0?	0?	0?	0?	0?	0?	0?	0?	0?	0?	0?	0?	0?	0?	54-	0?	0?	0?	0?	0?	0?	0?	0?	0?	0?	0?	0?	0?	0?	0?	0?	0?	0?	0?	0?	0?	0?	0?	0?	0?	0?	0?	11-	0?	0?	0?	0?	0?	0?	0?	0?	0?	0?	0?	0?	0?	0?	0?	0?	0?	0?	0?	0?	0?	0?	0?	0?	0?	0?	0?	0?	0?	0?	0?	0?	0?	0?	0?	0?	0?	0?	0?	0?	0?	0?	0?	0?	0?	0?	0?	0?	0?	0?	0?	0?	0?	0?	0?	12-	0?	0?	0?	0?	0?	0?	0?	0?	0?	0?	0?	0?	0?	0?	0?	0?	0?	0?	0?	0?	0?	0?	0?	0?	0?	0?	0?	0?	0?	0?	0?	0?	0?	0?	0?	0?	0?	0?	0?	0?	0?	1-	4-	0?	0?	0?	0?	0?	68-	0?	0?	0?	0?	0?	0?	0?	0?	0?	0?	0?	0?	0?	0?	0?	0?	0?	0?	0?	0?	0?	0?	0?	0?	0?	165-	0?	0?	0?	0?	0?	0?	0?	124-	0?	0?	0?	0?	0?	0?	0?	0?	0?	0?	0?	0?	0?	0?	0?	0?	0?	0?	0?	0?	0?	0?	0?	0?	0?	0?	0?	0?	0?	0?	0?	0?	0?	0?	0?	0?	0?	0?	0?	0?	1-	0?	0?	0?	0?	0?	0?	0?	0?	0?	0?	0?	0?	0?	0?	0?	0?	0?	0?	0?	0?	0?	0?	0?	0?	0?	0?	0?	0?	0?	47-	0?	0?	0?	0?	0?	0?	0?	0?	0?	0?	0?	0?	0?	0?	0?	0?	0?	0?	0?	79-	0?	0?	0?	87-	134-	0?	0?	0?	0?	0?	0?	0?	0?	0?	0?	0?	0?	0?	0?	0?	0?	0?	0?	0?	0?	0?	48-	0?	0?	0?	14-	0?	0?	0?	0?	0?	0?	0?	0?	0?	0?	0?	0?	11-	0?	0?	0?	0?	0?	0?	0?	75-	76-	0?	1-	0?	7-	11-	0?	0?	0?	0?	0?	0?	0?	0?	0?	0?	0?	0?	0?	0?	49-	0?	0?	0?	0?	0?	0?	0?	0?	0?	0?	0?	0?	0?	0?	0?	0?	0?	0?	0?	0?	0?	0?	0?	0?	0?	0?	52-	0?	0?	0?	0?	0?	0?	0?	0?	20-	0?	0?	0?	0?	0?	0?	0?	0?	0?	0?	0?	0?	0?	0?	0?	0?	0?	0?	0?	0?	0?	0?	0?	0?	0?	78-	0?	0?	0?	0?	0?	0?	0?	0?	0?	0?	0?	0?	0?	0?	0?	0?	0?	0?	21-	0?	0?	0?	0?	0?	0?	0?	46-	0?	0?	0?	0?	68-	0?	52-	0?	0?	0?	0?	0?	0?	0?	0?	0?	0?	0?	0?	0?	0?	97-	33-	0?	0?	0?	0?	0?	0?	0?	0?	0?	0?	0?	89-	0?	0?	0?	0?	173-	0?	0?	0?	0?	0?	0?	0?	0?	0?	0?	0?	0?	0?	0?	0?	0?	0?	0?	18-	0?	38-	0?	0?	68-	0?	0?	0?	0?	0?	0?	0?	0?	0?	0?	102-	0?	0?	0?	0?	0?	0?	0?	0?	0?	46-	0?	0?	0?	1-	0?	0?	0?	0?	0?	0?	0?	0?	0?	0?	0?	0?	0?	0?	0?	0?	0?	0?	0?	0?	0?	0?	0?	0?	0?	0?	0?	0?	0?	0?	0?	0?	1-	0?	0?	2-	0?	0?	0?	0?	0?	0?	0?	0?	55-	0?	0?	0?	0?	0?	0?	0?	0?	0?	0?	0?	14-	0?	0?	0?	0?	0?	0?	0?	0?	0?	0?	0?	0?	0?	0?	0?	0?	0?	0?	0?	0?	0?	0?	66-	68-	0?	0?	0?	0?	0?	0?	0?	0?	0?	0?	0?	0?	0?	0?	0?	0?	0?	0?	0?	0?	0?	0?	0?	0?	0?	0?	0?	0?	0?	0?	0?	0?	0?	0?	0?	0?	0?	0?	0?	0?	0?	0?	0?	0?	0?	0?	68-	0?	0?	0?	68-	0?	0?	0?	0?	0?	0?	0?	147-	0?	0?	0?	0?	0?	0?	0?	0?	0?	0?	0?	0?	0?	0?	0?	0?	0?	0?	0?	68-	0?	0?	0?	0?	0?	0?	0?	0?	0?	0?	0?	0?	30-	0?	0?	0?	0?	0?	0?	0?	0?	0?	0?	0?	0?	0?	0?	110-	0?	0?	0?	0?	0?	0?	0?	0?	0?	0?	0?	0?	0?	0?	0?	0?	0?	0?	0?	0?	0?	0?	39-	0?	0?	0?	0?	0?	0?	0?	0?	0?	0?	0?	0?	0?	0?	0?	0?	0?	0?	0?	0?	0?	0?	0?	0?	0?	0?	0?	11-	0?	0?	0?	0?	0?	0?	0?	0?	0?	0?	0?	0?	0?	0?	0?	0?	0?	0?	0?	0?	0?	0?	0?	68-	0?	68-	0?	0?	0?	0?	0?	0?	0?	0?	11-	0?	0?	0?	0?	0?	0?	0?	0?	32-	0?	68-	0?	0?	0?	0?	0?	0?	0?	0?	0?	0?	0?	0?	0?	0?	0?	0?	0?	0?	0?	68-	0?	0?	0?	0?	0?	0?	0?	0?	0?	0?	0?	0?	0?	0?	0?	0?	0?	0?	0?	0?	0?	0?	0?	0?	0?	0?	0?	0?	0?	0?	0?	0?	0?	0?	0?	0?	0?	0?	0?	0?	0?	0?	0?	0?	0?	0?	0?	0?	0?	0?	0?	0?	0?	0?	0?	1-	0?	0?	68-	0?	0?	0?	0?	0?	0?	0?	0?	0?	0?	0?	173-	0?	0?	0?	0?	0?	0?	0?	0?	0?	0?	0?	0?	0?	0?	0?	0?	0?	0?	0?	0?	0?	0?	0?	11-	0?	0?	100-	0?	0?	0?	0?	0?	0?	0?	0?	0?	0?	0?	0?	0?	0?	0?	0?	0?	0?	0?	0?	0?	0?	0?	0?	0?	0?	0?	0?	0?	0?	0?	0?	0?	0?	0?	0?	0?	0?	0?	0?	0?	0?	0?	0?	0?	0?	68-	0?	0?	0?	42-	0?	0?	0?	0?	0?	0?	0?	0?	44-	0?	0?	0?	0?	0?	0?	31-	0?	0?	0?	0?	0?	0?	0?	0?	0?	0?	0?	0?	1-	0?	0?	0?	0?	68-	0?	0?	0?	0?	0?	0?	0?	0?	0?	0?	0?	0?	0?	0?	0?	0?	0?	0?	0?	0?	0?	0?	0?	0?	0?	36-	0?	0?	0?	0?	0?	0?	0?	0?	0?	0?	0?	0?	0?	0?	37-	0?	0?	0?	0?	0?	0?	0?	0?	0?	0?	52-	0?	0?	0?	0?	0?	63-	0?	0?	0?	0?	0?	0?	89-	0?	0?	0?	0?	0?	0?	0?	0?	0?	0?	0?	0?	0?	0?	0?	0?	0?	0?	0?	0?	0?	0?	0?	32-	0?	68-	0?	0?	0?	0?	0?	45-	0?	0?	0?	0?	46-	0?	0?	0?	0?	0?	0?	0?	0?	0?	0?	0?	0?	0?	0?	0?	0?	0?	0?	0?	0?	0?	0?	0?	0?	0?	0?	0?	0?	0?	0?	0?	0?	0?	1-	1-	0?	0?	0?	0?	0?	0?	0?	0?	0?	0?	0?	0?	0?	0?	0?	0?	0?	0?	0?	0?	0?	0?	0?	0?	0?	0?	0?	0?	79-	0?	68-	0?	0?	0?	0?	0?	0?	0?	0?	0?	0?	0?	0?	0?	0?	0?	0?	0?	0?	0?	0?	0?	0?	0?	0?	0?	0?	0?	0?	0?	0?	0?	0?	0?	0?	0?	0?	0?	0?	0?	0?	0?	0?	0?	0?	0?	0?	0?	0?	0?	0?	0?	0?	0?	0?	0?	0?	0?	0?	0?	0?	0?	0?	0?	0?	0?	0?	0?	0?	0?	0?	0?	0?	0?	0?	0?	0?	0?	51-	0?	68-	0?	0?	1-	42-	0?	0?	0?	89-	0?	2-	0?	0?	0?	0?	0?	0?	0?	0?	0?	2-	0?	0?	0?	0?	11-	0?	0?	0?	0?	0?	0?	0?	0?	0?	75-	0?	0?	0?	0?	0?	0?	0?	0?	0?	0?	0?	0?	0?	0?	0?	0?	0?	0?	0?	0?	0?	0?	0?	0?	0?	0?	0?	0?	68-	75-	0?	0?	0?	0?	0?	0?	0?	0?	0?	0?	0?	0?	0?	0?	0?	0?	0?	0?	0?	0?	0?	0?	0?	0?	0?	0?	0?	0?	0?	0?	0?	0?	0?	0?	0?	0?	0?	0?	0?	0?	0?	0?	0?	0?	68-	0?	0?	0?	0?	0?	0?	68-	0?	0?	0?	0?	0?	0?	0?	46-	0?	0?	0?	0?	0?	0?	0?	0?	0?	0?	0?	0?	0?	0?	0?	0?	0?	0?	0?	70-	0?	0?	0?	0?	0?	0?	0?	0?	0?	0?	0?	0?	0?	0?	0?	0?	0?	0?	0?	0?	0?	0?	0?	0?	0?	0?	0?	0?	0?	0?	0?	0?	0?	0?	0?	0?	0?	0?	0?	0?	0?	85-	0?	2-	0?	0?	0?	0?	0?	0?	0?	0?	0?	0?	0?	0?	47-	0?	0?	0?	0?	0?	0?	85-	0?	0?	0?	0?	0?	0?	0?	0?	0?	0?	0?	0?	0?	0?	0?	0?	0?	0?	0?	0?	0?	0?	68-	0?	0?	0?	0?	0?	0?	0?	0?	0?	0?	0?	0?	11-	0?	0?	0?	33-	0?	0?	0?	0?	0?	0?	0?	0?	34-	0?	0?	0?	0?	16-	0?	0?	0?	0?	0?	0?	0?	0?	0?	132-	0?	0?	0?	0?	0?	0?	0?	0?	0?	0?	0?	0?	0?	0?	0?	0?	0?	0?	0?	0?	0?	0?	0?	0?	0?	0?	0?	0?	0?	0?	0?	0?	0?	0?	0?	0?	0?	0?	0?	0?	124-	0?	0?	0?	0?	0?	0?	0?	0?	0?	0?	0?	0?	0?	0?	0?	0?	0?	0?	0?	0?	0?	0?	0?	0?	0?	0?	0?	0?	0?	0?	0?	0?	0?	0?	0?	0?	0?	0?	28-	0?	0?	0?	0?	0?	0?	0?	0?	0?	0?	0?	0?	0?	0?	0?	0?	0?	0?	0?	0?	0?	0?	0?	0?	0?	0?	0?	0?	0?	0?	0?	0?	0?	0?	0?	0?	0?	0?	0?	0?	0?	0?	0?	0?	0?	0?	0?	0?	0?	0?	0?	0?	0?	0?	0?	0?	0?	0?	0?	0?	0?	0?	0?	0?	0?	0?	0?	0?	0?	31-	0?	0?	0?	0?	0?	0?	0?	50-	0?	0?	0?	0?	0?	0?	0?	0?	0?	0?	0?	0?	0?	0?	0?	0?	0?	0?	0?	0?	0?	0?	0?	0?	0?	0?	0?	2-	0?	0?	0?	0?	0?	0?	0?	0?	0?	0?	65-	0?	0?	0?	0?	0?	0?	0?	0?	0?	0?	0?	0?	0?	0?	0?	0?	0?	0?	0?	0?	0?	0?	0?	0?	0?	0?	0?	0?	0?	2-	0?	0?	0?	0?	0?	0?	0?	0?	0?	0?	0?	0?	0?	0?	0?	0?	0?	0?	0?	0?	0?	0?	0?	0?	14-	0?	0?	0?	0?	0?	0?	0?	0?	0?	137-	0?	0?	0?	2-	0?	0?	0?	0?	0?	0?	0?	0?	0?	0?	0?	0?	0?	0?	0?	0?	0?	0?	0?	0?	0?	0?	0?	0?	0?	3-	0?	20-	0?	0?	0?	0?	0?	0?	0?	0?	0?	0?	23-	44-	46-	0?	0?	0?	0?	0?	0?	0?	0?	0?	0?	0?	0?	0?	0?	0?	0?	0?	0?	0?	0?	0?	0?	0?	0?	0?	0?	0?	0?	0?	0?	0?	0?	57-	0?	0?	0?	0?	63-	0?	0?	0?	0?	0?	0?	0?	0?	68-	0?	0?	0?	0?	0?	0?	0?	0?	0?	18-	0?	0?	0?	0?	0?	0?	0?	0?	0?	0?	0?	29-	0?	0?	0?	0?	0?	0?	0?	0?	0?	62-	0?	0?	0?	0?	0?	0?	0?	8-	0?	0?	0?	0?	0?	0?	0?	0?	0?	0?	0?	0?	0?	0?	0?	0?	0?	0?	0?	0?	0?	0?	0?	0?	0?	0?	0?	0?	0?	0?	0?	0?	0?	0?	0?	0?	0?	0?	0?	0?	0?	0?	0?	0?	0?	0?	0?	0?	0?	11-	0?	0?	0?	0?	0?	0?	0?	2-	0?	11-	0?	0?	68-	0?	0?	0?	0?	0?	0?	0?	0?	0?	0?	0?	0?	0?	0?	0?	0?	0?	0?	0?	0?	0?	0?	0?	0?	0?	0?	0?	0?	0?	0?	0?	0?	0?	0?	0?	0?	0?	0?	0?	0?	0?	0?	37-	0?	0?	0?	0?	0?	2-	0?	0?	0?	0?	0?	0?	0?	4-	0?	0?	42-	0?	0?	0?	0?	8-	0?	26-	0?	46-	8-	0?	0?	20-	2-	0?	57-	0?	0?	31-	0?	0?	0?	0?	0?	0?	0?	0?	0?	0?	0?	0?	0?	0?	0?	0?	0?	0?	0?	0?	0?	0?	0?	0?	0?	0?	0?	68-	0?	0?	0?	0?	0?	0?	0?	0?	0?	0?	0?	0?	0?	0?	0?	0?	0?	0?	0?	0?	0?	0?	0?	0?	0?	0?	0?	0?	0?	0?	0?	0?	0?	0?	0?	0?	0?	0?	0?	40-	0?	0?	0?	0?	0?	0?	0?	0?	31-	0?	0?	35-	0?	0?	0?	0?	0?	0?	0?	0?	0?	0?	0?	0?	0?	0?	0?	0?	0?	0?	0?	49-	0?	0?	0?	0?	0?	0?	0?	0?	0?	0?	0?	0?	0?	0?	0?	0?	0?	0?	0?	0?	0?	0?	0?	0?	0?	0?	0?	0?	156-	0?	0?	0?	0?	0?	0?	0?	0?	0?	0?	0?	0?	0?	0?	0?	0?	0?	0?	0?	0?	90-	0?	0?	0?	0?	0?	0?	0?	0?	0?	0?	0?	0?	0?	0?	0?	0?	0?	0?	0?	0?	0?	0?	0?	111-	0?	0?	0?	0?	0?	0?	0?	0?	0?	0?	0?	0?	0?	0?	0?	0?	0?	0?	0?	0?	0?	68-	0?	0?	0?	0?	0?	0?	0?	0?	0?	0?	0?	0?	0?	0?	0?	0?	0?	0?	0?	0?	0?	0?	0?	0?	0?	0?	0?	0?	0?	0?	0?	0?	0?	0?	0?	0?	0?	0?	0?	0?	0?	0?	0?	0?	0?	0?	0?	0?	0?	0?	0?	0?	0?	0?	0?	0?	0?	0?	0?	0?	0?	0?	0?	0?	0?	68-	0?	0?	0?	0?	18-	0?	0?	0?	0?	11-	0?	0?	0?	0?	0?	0?	0?	0?	0?	0?	0?	0?	0?	0?	0?	0?	0?	0?	0?	0?	0?	36-	0?	0?	0?	0?	0?	0?	0?	0?	0?	0?	0?	0	0
GCA_000808765.3_Velvet_assembly_of_Acinetobacter_baumannii_ABUH42783_genomic.fna	4	6	6	6	6	1	2	1	6	6	2	6	3	3	6	6-	6	6	12	6-	1	5	6+	6	3	125-	490-	5	5	6	2	5	6	6	5	5	6	6	6	6	5	6	6	6	6	6	6	6	3	6	6	6	5	6	12	14	14	14	1	1	13	13	13	12	13	6	6	6	6	6	6	6	6	6	6	6	6	75	6	6	6	6	6	6	495-	6	6	6	6	6	6	6	5	6	5	6	6	6	6	5	6	5	6	5	5	6-	6	6	5	6	6	6	3	5	1	1	2	5	2	6	4	6	6	6	5	6	6	6	6	6	5	6	6	N	6	6	4	6	6	430-	6	5	5	5	6	6	5	6	5	6	6	6	6	6	5	6	1	1	1	1	13	1	1	1	1	6	6	5	5	5	6	4	1	1	1	6	1	1	1	1	1	0?	1	1	1	1	0?	1-	1	1	1	1	1	1	1	6	4	1	1	1	1	1	1	1	1	1	1	1	1	1	110	1	1	1	1	1	1	1	1	1	1	1	1	1	1	1	1	1	6	1	1	1	1	1	1	1	1	1	1	1	1	1	1	1	1	1	1	1	1	1	1	1	12	1	1	1	1	1	1	1	1	1	1	1	1	1	1	1	1	1	1	1	1	70-	1	6	1	1	1	1	1	1	1	1	1	1	1	1	1	1	1	1	1	1	1	1	1	1	1	1	1	49-	1	1	1	1	1	1	1	52	1	1	1	1	1	1	1	1	1	1	1	1	1	17-	1	1	1	1	230-	1	1	1	1	1	1	1	1	1	1	1	1	1	1	1	1	1	1	1	1	1	1	1	1	1	1	1	1	1	1	1	1	1	1	1	1	1	1	1	1	1	1	1	1	1	1	1	1	1	1	1	1	1	1	1	1	1	1	1	1	1	1	1	1	1	1	6	1	1	1	1	1	1	1	1	1	1	1	1	1	1	1	1	1	1	1	1	1	6	13-	1	1	1	1	1	1	1	1	1	1	1	1	1	1	1	1	1	1	1	1	1	1	1	1	1	1	1	1	1	1	1	1	1	1	1	1	1	1	1	1	1	1	446-	1	1	1	1	1	1	1	1	1	1	1	1	1	1	1	1	1	1	1	1	1	6	1	1	1	1	1	1	1	1	1	1	N	1	1	1	1-	1	1	1	1	1	1	1	1	1	1	1	1	1	1	1	1	1	1	1	1	1	1	1	1	1	1	1	1	1	6	1	1	1	1	1	1	1	1	1	13-	3	1	1	1	1	1	1	1	1	1	1	1	1	1	1	1	1	1	1	1	1	1	1	1	1	1	1	1	1	1	1	1	1	1	1	1	1	62-	1-	1	6	1	1-	1	1	1	1	1	1	6	1	1	1	6	1	1	1	1	1	1	1	1	1	1	1	1	1	1	1	1	1	1	1	1	1	1	1	1	1	1	1	1	1	1	1	1	1	1	1	1	1	1	1	1	1	1	1	1	1	1	1	1	1	1	1	1	1	6	1	1	224-	0?	0?	0?	0?	0?	0?	0?	0?	0?	37	53	N	0?	13-	0?	N	1	1	0?	0?	1	1	1	1	1	1	1	1	1	1	1	1	1	1	1	1	1	1	1	1	1	1	1	1	1	1	6	1	6	1	1	1	1	1	1	1	1	1	1	1	1	1	1	1	1	1	1	1	1	1	1-	1-	1	1	1	1	1	1	1	1	1	1	1	1	1	1	1	1	1	50-	176-	1	1	1	1	93-	1	1	1	6	1	1	1	1	1	1	1	1	1	1	1	1	1	1	1	1	0?	1	1	1	1-	1	1	1	1	1	1	1	1	1	1	1	1	1	1	1	1	1	1	1	1	1	6	1	1	1	1	1	1	1	1	1	1	1	1-	1	1	1	1	1	1	1	1	1	6	1	1	1	N	1	1	1	1	1	1	1	1	0?	0?	0?	1	1	0?	1	1	1	1	1	1	1	1	1	1	1	1	1	1	1	1	1	1	1	1	1	1	1	1	155-	1	1	1	1	96-	1	1	1	1	1	1	1	1	6	1	1	1	1	1	1	1	1	1	1	6	1	1	1	1	1	1	1	1	1	1	1	1	1	1	1	1	1	1-	0?	1-	1	1	1	0?	0?	1	1	1	1	1	1	1	122-	1	1	1	1	1	1	1	1	1	1	1	1	1	1	1	1	1	1	1	1	1	1	1	1	1	1	1	1	1	1	1	1	1	1	1	1	1	1	1	1	1	1	1	1	1	6	1	1	1	1	1	1	1	1	1	1	1-	6	1	1	1	1	224-	1	1	1	1-	0?	33-	1	1	1	1	1	1	1	1	1	1	1	1	1	1	1	1	1	16	1	1	1	1	214-	1	1	1	31-	1	1	1	117-	1	1	1	1	1	1	1	1	1	1	1	1	1	1	1	1	1	1	1	1	1	1	1	1	1	1	1	1	1	1	6	1	1	1	1	1	1	1	1	1	276-	1-	1	30	1	1	1	1	1	1	1	1	1	1	1	1	1	1	1	5	1	1	1	1	1	1	1	1	1	1	1	1	1	1	1	1	8	1	1	1	1	1	1	1	1	1	1	1	1	1	6	1	1	1	1	210-	1	1	1	1	1	1	1	0?	0?	1	1	1	1	1	175-	1	1	1	1	1	1	1	1	1	1	1	1	1	1	1	1	1	1	54	1	1	1	1	1	1	1	1	1	1	1	1-	1	1	1	1	1	1	1	6	438+	6	1	1	1	1	1	1	1	1	1	1-	1	1	1	1	1	1	1	1	1	1	1	1	1	1	1	1	1	1	1	1	1	1	1	1	1	1	296-	1	1	1	1	1	1	1	1	1-	1	1	1	1	1	1	1	6	1	1	1	1	1	1	1-	1	1	1	1	1	1	12	1	1	1	0?	1	1	1	1	1	1	1	1	1	111-	1	1	1	1	1	1	1	1	1	1	1	1	1	1	6	1	1	1	1	1	1	1	1	1	76-	1	1	1	1	1	1	1	1	1	1	1	1	1	1	1	1	1	1	1	1	1	1	6	1	1	1	1	1	1	1	1	1	1	1	1	1	1	1	1	1	1	1	1	1	1	1	1	1	1	1	1	1	1	1	1	1	1	1	0?	1	1	1	1	1	1	1	1	6	1	1	1	1	6	1	1	1	1	1	1	1	1	1-	1	1	1	134-	1	6	1	1	1	1	1	1	1	1	6	1	1	1	1	1	1	1	88-	1	1	1	0?	84-	1	1	1	1	1	1	1	1	1-	1	1	1	1	1	1	1	1	1	1	6	1	1	1	1	1	6	1	1	1	1	1	1	1	1	1	1	1	1	1	1	1	1	1	1	1	1	143-	1-	1	1	1	1-	1	1	1	1	1	6	1	1	1	1	1	1	1	1	1	1	1	1	58	1	6	1	1	1	1	1	1	1	1	1	1	1	1	1	1	1	1	1	1	1	1	1	1	1	1	1	180-	68-	1	1	1	1	1	1	1	1+	0?	165-	1	1	0?	0?	1	1	55-	1	1	1	1	1	1	1	1	1	1	1	1	1	1	1	1	1	1	1	1	1	1	1	1	1	1	1	1	1	1	1	1	1	1	1	1	1	1	1	1	1	1	1	6	1	1	1	6	1	1	1	1	1	1	1-	0?	1	1	1	1	1	1	1	1	1	1	1	1	1	1	1	1	1	1	1	6	5	5	5	6	5	5	5	5	5	6	5	4	5	5	1	6	6	1	1	6	6	5	5	5	1	1	1	1	1	1	1	1	1	1	1	1	1-	1	1	1	1	1	1	485-	1	1	1	1	1	1	1	1	1	1	1	1	1	1	1	1	1	1	1	1	1	1+	1	1	1	6	1	1	1	1	1	1	1	1	1	1	1	1	5	1	1	1	154-	1	0?	1	1	1	1	1	1	1	1-	1	1	1	1	1	1	1	1	1	1	1	1	1	1	1	1	1	1	44-	1	1	1	1	1	1	1	1	1	1	1	1	1	1	1	1	1	1	1	1	6	1	1	1	1	1	1	1	1	1	1	1	1	1	1	1	1	1	1	1	1	1	1	1	1	1	1	6	1	1	1	1	1	1	1	1	1	1	1	1	46	1	1	1	1	1	1	1	1	1	1	1	1	1	6-	1	1	1	1	1	1	1	1	1	1	1-	1	1	51	1	6	1	1	1-	1	1	1	1	1	1	1	1	6	1-	1-	1	1	1	1	1	1	1	1	1	1	96-	1	12	1	1	1	1	1	6	1	1	1	1	1	1	1	1	1	1	1	1	1	1	1	1	1	1	1	1	1-	1	1	1	1	1	1	1	1	1	1	1	1	1	1	1	1	1	1	1	1	1	1	1	1	1	1	1	6	1	1	1	1	1	1	1	1	1	1	1	1	1	1	1	1	1	1	1	1	1	1	1	1	1	1	1	1	1-	1	1	1	1	1	1	1	1	1	1	1	1	1	1	1	1	1	1	1	1	1	1	1	1	1	1	13	1	1	1	1	1	1	1	1	1	1	1	1	1	1	1	1	1	1-	1	1	1	1	1	1	1	6	1	1	1	1	1	1	1	1	1	1	1	1	1	1	1	1	1	1	1	1	1	1	1	1	1	1	6	1	1-	1	1	1	1	1	1	4	1	1	1	230-	1	157-	1	1	1	1-	1-	1	1	1	1	1	1	1	1	1	89-	1	6	1	1	1	1	1	1	1	1	1	1	1	1	1	1	1	1	40	1	1	1	1	1	1	1	52	1	1	1	1	1	1	1	1	1	1	1	1	1	1	1	1	1	1	1	1	1	1	1	12	1	1	3	1	1	1	1	1	1	1	1	3	1	1	1	1	1	1	1	1	1	1	1	1	1	1	1	1	1	1	1	1	1	1	1	1	1	1	1	1	1	1	1	1	1	1	1	1	1	1	1	1	217-	1	1	1	1	1	1	1	1	1	1	1	1	1	1	1	1	1	0?	1	1	3	1	1	1	1	1	1	1	1	1	1	1	1	1	1	1	1	6	1	1	1	1	1	1	6	6	6	6	6	6	9	2	6	1	2	5	1	1	1	6	6	6	3	6	6	6	6	6	6	6	6	6	6	14	1	5	160-	1	6	6	6	5	6	6	6	6	6	6	6	6	6	6	6	6	6	6	6	6	6	6	6	6	6	6	6	6	6	6	0?	6	6	6	6	6	6	6	6	6	3	3	3	3	3	3	3-	3	3	3	6	3	3	3	3	6	3	6	6	12	71-	6	4	6	6	6	6	6	6	6	5	5	6	6	6	13	6	6	6	5	1	6	6	6	6	3	5	6	6	6	6	6	4	6	6	6	4	5	6	6	6	5	3	6	5	6	6	6	6	6	6	6	27	6	6	6	6	6	6	6	6	6	6	160+	6	6	2	1	6	6	6	3	3	6	6	6	6	0?	6-	6	5	5	5	5	13	6	6-	6	6	6	6	6	6	6	5	5	5	4	6	6	5	6	5	2	5	6	6	6	2	6	6	6	6	175-	6	6	6	6	3	6	13	6	6	6	6	6	6	6	6	6	4	5	5	6	6	5	5	6	6	6	13	6+	0	0
GCA_000809885.3_ASM80988v3_genomic.fna	4	6	6	6	6	1	2	1	6	6	2	6	3	3	6	6	6	6	12	6	1	5	6+	6	3	6	6	5	5	6	2	5	6	6	5	5	6	6	6	6	5	6	6	6	6	6	6	6	3	6	6	6	5	6	12	14	14	14	1	1	13	13	13	12	13	6	6	6	6	6	6	6	6	6	6	6	6	75	6	6	6	6	6	6	6	6	6	6	6	6	6	6	5	6	5	6	6	6	6	5	6	5	6	5	5	6	6	6	5	6	6	6	3	5	1	1	2	5	2	6	4	6	6	6	5	6	6	6	6	6	5	6	6	N	6	6	4	6	6	6	6	5	5	5	6	6	5	6	5	6	6	6	6	6	5	6	1	1	1	1	13	1	1	1	1	6	6	5	5	5	6	4	1	1	1	6	1	1	1	1	1	1	1	1	1	1	1	1	1	1	1	1	1	1	1	6	4	1	1	1	1	1	1	1	1	1	1	1	1	1	110	1	1	1	1	1	1	1	1	1	1	1	1	1	1	1	1	1	6	1	1	1	1	1	1	1	1	1	1	1	1	1	1	1	1	1	1	1	1	1	1	1	12	1	1	1	1	1	1	1	1	1	1	1	1	1	1	1	1	1	1	1	1	1	1	6	1	1	1	1	1	1	1	1	1	1	1	1	1	1	1	1	1	1	1	1	1	1	1	1	1	1	1	1	1	1	1	1	1	1	1	1	1	1	1	1	1	1	1	1	1	1	1	1	1	1	1	1	1	1	1	1	1	1	1	1	1	1	1	1	1	1	1	1	1	1	1	1	1	1	1	1	1	1	1	1	1	1	1	1	1	1	1	1	1	1	1	1	1	1	1	1	1	1	1	1	1	1	1	1	1	1	1	1	1	1	61	1	1	1	1	1	1	1	1	6	1	1	1	1	1	1	1	1	1	1	1	1	1	1	1	1	1	1	1	1	1	6	13	1	1	1	1	1	1	1	1	1	1	1	1	1	1	1	1	1	1	1	1	1	1	1	1	1	1	1	1	1	1	1	1	1	1	1	1	1	1	1	1	1	1	1	1	1	1	1	1	1	1	1	1	1	1	1	1	1	1	1	1	1	1	1	1	6	1	1	1	1	1	1	1	1	1	1	1	1	1	1	1	1	1	1	1	1	1	1	1	1	1	1	1	1	1	1	1	1	1	1	1	1	1	1	1	1	1	1	1	1	6	1	1	1	1	1	1	1	1	1	1	3	1	1	1	1	1	1	1	1	1	1	1	1	1	1	1	1	1	1	1	1	1	80	1	1	1	1	58	1	1	1	1	1	1	1	1	1	1	1	1	6	1	1	1	1	1	1	1	1	6	1	1	1	6	1	1	1	1	1	1	1	1	1	1	1	1	1	1	1	1	1	1	1	1	1	1	1	1	1	1	1	1	1	1	1	1	1	1	1	1	1	1	1	1	1	1	1	1	1	1	1	1	1	1	1	1	1	6	1	1	4	4	4	4	6	4	6	6	6	4	4	4	4	4	6	4	4	4	3	4	4	1	1	1	1	1	1	1	1	1	1	1	1	1	1	1	1	1	1	1	1	1	1	1	1	1	1	6	1	6	1	1	1	1	1	1	1	1	1	1	1	1	1	1	1	1	1	1	1	1	1	1	1	1	1	1	1	1	1	1	1	1	1	1	1	1	1	1	1	1	1	1	1	1	1	1	1	1	1	1	6	1	1	1	1	1	1	1	1	1	1	1	1	1	1	1	1	1	1	1	1	1	1	1	1	1	1	1	1	1	1	1	1	1	1	1	1	1	1	1	94	1	1	6	1	1	1	1	1	1	1	1	1	1	1	1	1	1	1	1	1-	1	1	1	1	6	1	1	1	1	1	1	1	1	1	1	1	1	1	1	N	1	1	1	1	1	1	1	1	1	1	1	1	1	1	1	1	1	1	1	1	1	1	1	1	1	1	1	1	1	1	1	1	1	1	1	1	1	1	1	1	1	6	1	1	1	1	1	1	1	1	1	1	6	1	1	1	1	1	1	1	1	1	1	1	1	1	1	1	1	1	1	1	1	1	1	1	1	1	1	1	1	1	1	1	1	1	1	1	1	1	1	1	1	1	1	1	1	1	1	1	1	1	1	1	1	1	1	1	1	1	1	1	1	1	1	1	1	1	1	1	1	1	1	1	1	1	1	1	1	1	1	6	1	1	1	1	1	1	1	1	1	1	1	6	1	1	1	1	1	1	1	1	1	1	1	1	1	1	1	1	1	1	1	1	1	1	1	1	1	1	1	1	1	1	1	1	1	1	1	1	1	1	1	1	1	1	1	1	1	1	1	1	1	1	1	1	1	1	1	1	1	1	1	1	1	1	1	1	1	1	1	1	1	1	1	1	6	1	1	1	1	1	1	1	1	1	1	1	1	30	1	1	1	1	1	1	1	1	1	1	1	1	1	1	1	5	1	1	1	1	1	1	1	1	1	1	1	1	1	1	1	1	8	1	1	1	1	1	1	1	1	1	1	1	1	1	6	1	1	1	1	1	1	1	1	1	1	1	1	1	1	1	1	1	1	1	1	1	1	1	1	1	1	1	1	1	1	1	1	1	1	1	1	1	1	1	1	1	1	1	1	1	1	1	1	1	1	1	1	1	1	1	1	1	1	6	438+	6	1	1	1	1	1	1	1	1	1	1	1	1	35	1	1	1	1	1	1	1	1	1	1	1	1	1	1	1	1	1	1	1	1	1	1	1	1	1	1	1	1	1	1	1	1	1	1	1	1	1	1	1	1	6	1	1	1	1	1	1	1	1	1	1	1	1	1	12	1	1	1	1	1	1	1	1	1	1	1	1	1	1	1	1	1	1	1	1	1	1	1	1	1	1	1	1	6	1	1	1	1	1	1	1	1	1	1	1	1	1	1	1	1	1	1	1	1	1	1	1	1	1	1	1	1	1	1	1	1	6	1	1	1	1	1	1	1	1	1	1	1	1	1	1	1	1	1	1	1	1	1	1	1	1	1	1	1	1	1	1	1	1	1	1	1	1	1	1	1	1	1	1	1	1	6	1	1	1	1	6	1	1	1	1	1	67	1	1	1	1	1	1	1	1	6	1	1	1	1	1	1	1	1	6	1	1	1	1	1	1	1	1	1	1	1	1	1	1	1	1	1	1	1	1	1	1	1	1	1	1	1	1	1	1	1	1	6	1	1	1	1	1	6	1	1	1	1	1	1	1	1	1	1	1	1	1	1	1	1	1	1	1	1	1	1	1	1	1	1	1	1	1	1	1	6	1	1	1	1	1	1	1	1	1	1	1	1	58	1	6	1	1	1	1	1	1	1	1	1	1	1	1	1	1	1	1	1	1	1	1	1	1	1	1	1	1	1	1	1	0?	1	1	1	1	1+	1	1	1	1	1	1	1	1	6	1	1	1	1	1	1	1	1	1	1	1	1	1	1	1	1	1	1	1	1	1	1	1	1	1	1	1	1	1	1	1	1	1	1	1	1	1	1	1	1	1	1	1	6	1	1	1	6	1	1	1	1	1	1	1	67	1	1	1	1	1	1	1	1	1	1	1	1	1	1	1	1	1	1	1	6	5	5	5	6	5	5	5	5	5	6	5	4	5	5	1	6	6	1	1	6	6	5	5	5	1	1	1	1	1	1	1	1	1	1	1	1	1	1	1	1	1	1	1	1	1	1	1	1	1	1	1	1	1	1	1	1	1	1	1	1	1	1	1	1	1	1+	1	1	1	6	1	1	1	1	1	1	1	1	1	1	1	1	5	1	1	1	1	1	1	1	1	1	1	1	1	1	1	1	1	1	1	1	1	1	1	1	1	1	1	1	1	1	1	1	1	1	1	1	1	1	1	1	1	1	1	1	1	1	1	1	1	1	1	1	1	1	6	1	1	1	1	1	1	1	1	1	1	1	1	1	1	1	1	1	1	1	1	1	1	1	1	1	1	6	1	1	1	1	1	1	1	1	1	1	1	1	1	1	1	1	1	1	1	1	1	1	1	1	1	1	6	1	1	1	1	1	1	1	1	1	1	1	1	1	51	1	6	1	1	1	1	1	1	1	1	1	1	1	6	1	1	1	1	1	1	1	1	1	1	1	1	1	1	12	1	1	1	1	1	6	1	1	1	1	1	1	1	1	118	1	1	1	1	1	1	1	1	1	1	1	1	1	1	1	1	1	1	1	1	1	1	1	1	1	1	1	1	1	1	1	1	1	1	1	1	1	1	1	6	1	1	1	1	1	1	1	1	1	1	1	1	1	1	1	1	1	1	1	1	1	1	1	1	1	1	1	1	1	1	1	1	1	1	1	1	1	1	1	1	1	1	1	1	1	1	1	1	1	1	1	1	1	1	1	13	1	1	1	1	1	1	1	1	1	1	1	1	1	1	1	1	1	1	1	1	1	1	1	1	1	6	1	1	1	1	1	1	1	1	1	1	1	1	1	1	1	1	1	1	1	1	1	1	1	1	1	1	6	1	1	1	1	1	1	1	1	4	1	1	1	1	1	1	1	1	1	1	1	1	1	1	1	1	1	1	1	1	1	1	6	1	1	1	1	1	1	1	1	1	1	1	1	1	1	1	1	1	1	1	1	1	1	1	1	1	1	1	1	1	1	1	1	1	1	1	1	1	1	1	1	1	1	1	1	1	1	1	1	68	1	1	3	1	1	1	1	1	1	1	1	3	1	1	1	1	1	1	1	1	1	1	1	1	1	1	1	1	1	1	1	1	1	1	1	1	1	1	1	1	1	1	1	1	1	1	1	1	1	1	1	1	1	1	1	1	1	1	1	1	1	1	1	1	1	1	1	1	1	1	1	1	1	3	1	1	1	1	1	1	1	1	1	1	1	1	1	1	1	1	6	1	1	1	1	1	1	6	6	6	6	6	6	9	2	6	1	2	5	1	1	1	6	6	6	3	6	6	6	6	6	6	6	6	6	6	14	1	5	6	1	6	6	6	5	6	6	6	6	6	6	6	6	6	6	6	6	6	6	6	6	6	6	6	6	6	6	6	6	6	6	6	6	6	79	6	6	6	6	6	6	3	3	77	3	3	3	3	3	3	3	6	3	3	3	3	6	3	6	6	12	6	6	4	6	6	6	6	6	6	6	5	5	6	6	6	13	6	6	6	5	1	6	6	6	6	3	5	6	6	6	6	6	4	6	6	6	4	5	6	6	6	5	3	6	5	42	6	6	6	6	6	6	27	6	6	6	6	6	6	6	6	6	6	160+	6	6	37	1	6	6	6	3	3	6	6	6	6	6	6	6	5	5	5	5	13	6	6	6	6	6	6	6	6	6	5	5	5	4	6	6	5	6	5	2	5	6	6	6	2	6	6	6	6	6	6	6	6	6	3	6	13	6	6	6	6	6	6	6	6	6	4	5	5	6	6	5	5	6	6	6	13	6+	0	0
GCA_000809945.3_ASM80994v3_genomic.fna	2	1	1	58	1	1	1	1	1	50	1	1	1	1	1	1	1	1	1	1	1	1	1	1	1	1	1	1	1	1	1	1	1	46	1	1	4	4	4	4	6	4	4	54	4	4	4	4	2	4	4	4	8	9	2	84	81	60	3	60	52	211	56	56	55	78	50	83	68	57	51	53	70	41	41	12	12	103	13	13	13	13	8	14	14	99	77	14	89	14	18	61	5	6	5	41	6	6	6	5	6	5	6	5	5	6	6	6	5	6	6	6	3	5	1	1	2	11	2	6	4	6	6	6	11	11	13	10	12	12	7	34	12	N	12	12	9	9	7	13	12	9	7	11	12	12	11	11	8	75	51	6	6	6	5	6	1	1	1	1	13	1	1	1	1	6	6	5	5	5	6	4	1	1	1	1	1	1	1	1	1	1	1	1	1	1	1	1	1	1	1	1	1	1	1	6	1	1	1	1	1	1	1	1	1	1	1	1	1	1	1	1	1	1	1	1	1	1	1	1	1	1	1	1	1	1	1	1	6	1	1	1	1	1	1	1	1	1	1	1	1	1	1	1	1	1	1	1	1	1	1	1	1	1	1	65	1	85	1	1	1	1	1	1	104	1	1	1	1	1	1	1	1	1	1	6	1	1	21	1	1	1	1	1	1	1	1	1	1	N	1	1	1	1	1	1	1	1	1	1	1	1	1	1	1	1	1	1	1	1	1	1	1	100	1	1	1	1	1	1	1	1	1	1	1	1	1	1	1	1	1	1	1	1	1	1	1	1	1	1	1	1	1	1	1	1	1	1	1	1	1	1	1	1	1	1	1	1	1	1	1	1	1	1	1	1	1	1	1	1	1	1	1	87	1	1	1	1	79	1	1	1	1	1	1	1	1	1	1	1	1	1	1	1	1	6	1	1	1	1	1	1	1	1	1	1-	1	1	1	1	1	1	1	1	1	1	64	6	13	1	1	1	1	1	1	1	1	1	1	1	1	1	1	1	1	1	1	1	1	1	1	1	1	1	1	1	1	1	1	1	1	1	1	1	1	1	1	1	1	1	1	1	1	1	1	1	1	1	1	1	1	1	1	1	1	1	1	1	1	1	1	1	1	6	1	1	1	1	1	1	1	1	1	1	1	1	1	1	1	1	1	1	1	1	1	1	1	1	1	1	1	1	1	86	1	80	1	1	1	1	1	1	1	1	1	1	1	1	6	47	1	1	1	1	1	1	1	1	1	3	1	1	1	1	1	1	1	1	1	1	1	1	1	1	1	1	1	1	1	1	1	81	1	1	1	1	1	1	1	1	1	1	1	1	1	1	1	1	1	6	1	1	1	1	1	1	1	1	6	1	74	1	6	1	1	1	1	1	1	1	1	1	1	1	1	1	1	1	1	1	1	1	1	1	1	1	1	1	1	1	1	1	1	1	1	1	1	1	1	1	1	1	1	1	1	1	1	1	1	1	1	1	1	1	1	1	6	1	1	224-	0?	108	51	62	1	44	113	72	42	34	51	53	51	63	75	20	15	2	47	52	1	1	1	1	1	1	1	1	1	1	1	1	1	1	1	1	1	1	1	1	1	1	1	1	1	123	6	1	6	1	1	1	1	1	1	1	1	1	1	1	1	1	1	1	1	68	1	1	49	1	0?	17-	1	1	1	1	1	1	37	1	1	1	1	1	1	1	1	1	1	1	1	1	1	1	1	1	1	1	1	6	1	1	1	1	1	1	1	1	1	1	1	1	1	1	1	1	1	1	1	1	0?	0?	1	1	1	1	1	1	1	1	1	1	1	1	1	1	1	1	1	1	1	1	6	1	1	1	1	1	1	1	1	1	1	1	1	1	1	1	1	1	1	1	1	1	6	1	1	1	1	1	1	1	1	1	1	1	1	1	1	1	1	1	1	1	1	1	1	1	1	1	1	1	1	1	1	1	1	1	1	1	1	73-	1	1	1	1	1	1	1	1	1	1	1	1	1	1	1	1	1	1	1	6	1	1	1	1	1	1	1	1	57	1	6	1	1	1	1	1	1	1	1	1	1	1	1	1	1	1	1	1	1	1	1	1	1	1	1	1	1	1	1	1	1	1	1	1	1	1	1	1	1	1	1	1	1	1	1	1	1	1	1	1	1	1	1	1	1	1	1	1	1	1	1	1	1	1	59	1	1	1	1	1	1	1	1	1	1	1	1	1	1	6	1	1	1	1	273-	1	1	1	1	1	N	1	1	1	1	1	1	1	1	1	1	1	1	1	1	1-	1	1	1	1	1	1	1	1	1	1	1	1	1	1	1	1	1	1	1	1	1	1	1	1	1	1	1	1	1	1	1	1	1	1	1	1	1	1	1	1	1	1	1	1	1	1	1	1	1	1	1	1	1	1	1	1	1	1	6	1	1	1	1	1	1	1	1	1	1	1	1	221-	1	1	71	1	1	1	1	1	1	1	1	1	1	1	1	5	1	1	1	1	1	1	1	1	1	1	1	1	1	1	1	1	8	1	1	1	1	1	1	73	1	1	1	1	1	1	6	1	1	1	1	1	1	1	1	1	1	1	17	1	1	1	1	1	1	1	1	1	1	1	1	1	1	69	1	1	1	1	1	1	1	1	1-	1	1	1	1	1	1	1	1	1	1	1	1	1	1	1	1	1	1	1	1	1	1	6	438+	75	1	1	1	1	1	1	1	1	1	1	1	1	1	1	1	1	1	1	1	1	1	1	1	1	1	1	1	1	1	1	1	1	1	1	1	1	1	1	1	1	1	0?	0?	0?	0?	0?	0?	0?	1	1	1	1	1	6	1	1	1	1	1	1	1	1	1	1	1	1	1	1	1	1	1	1	1	1	1	1	1	1	1	1	1	1	1	1	1	1	1	1	1	1	1	1	1	42	1	1	6	1	1	1	1	1	1	85	1	1	55	1	1	1	1	1	1	1	1	1	1	1	1	1	1	1	1	1	1	1	1	1	1	1	1	1	1	1	1	1	1	1	1	1	1	1	1	1	1	1	1	38	1	1	1	1	1	61	1	1	1	1	1	1	1	1	1	1	1	1	1	1	1	1	1	1	1	1	6	1	1	1	1	1	1	1	1	1	1	1	1	1	1	1	1	1	1	1	6	1	1	1	33	1	1	1	1	6	1	1	1	1	1	1	1	1	1	1	1	1	0?	68-	0?	0?	0?	0?	0?	1	1	1	1	1	1	1	1	1	1	1	1	1	6	1	1	1	1	1	6	1	1	1	1	1	1	1	1	1	1	1	1	1	61	1	1	1	1	1	1	1	1	1	1	1	112	1	1	1	1	1	6	1	1	1	1	1	1	1	1	1	1	1	1	1	1	6	1	1	1	1	1	1	1	1	1	1	1	1	1	1	1	1	1	1	1	1	1	1	1	1	1	1	1	1	1	1	1	56	1	1	1+	1	1	1	1	1	1	1	1	6	1	1	1	1	1	1	1	1	1	1	1	1	1	1	1	1	1	1	1	1	1	1	1	1	1	1	1	1	1	1	1	1	1	1	1	1	1	1	1	1	1	1	1	150	1	1	1	6	1	1	1	1	1	1	1	1	1	1	1	1	1	1	1	1	1	1	1	1	1	1	1	1	1	1	1	6	5	5	5	6	5	5	5	5	5	6	5	4	5	5	1	6	6	75	34	52	58	5	5	5	5	45	62	1	1	1	1	1	1	1	1	1	1	1	1	1	1	1	1	1	1	1	1	1	1	1	1	1	1	53	1	1	1	1	1	1	1	1	1	1	1	1+	1	1	1	6	1	1	1	1	1	1	1	1	1	1	1	1	5	1	1	1	1	1	1	1	1	1	1	1	1	1	1	1	1	1	1	1	1	1	1	1	1	1	1	1	1	1	1	1	1	1	1	1	1	1	1	1	1	1	1-	1	1	1	1	1	1	1	1	1	1	72	6	1	1	1	1	1	1	1	1	1	1	1	1	1	1	1	1	1	1	1	1	1	1	1	1	1	1	6	1	1	1	1	1	1	1	1	1	1	1	1	1	1	1	1	1	1	1	1	1	1	1	1	1	1	6	1	1	1	1	1	1	1	1	1	1	1	1	1	1	1	6	1	1	116	1	1	1	1	66	1	1	1	1	1	1	1	1	1	1	1	1	1	1	1	1	1	1	1	1	1	1	1	1	6	1	1	1	1	76	1	1	1	1	1	1	1	1	1	1	1	1	1	1	1	1	1	1	1	1	1	1	1	1	1	1	1	1	1	1	1	1	1	1	63	1	1	1	1	1	1	1	1	6	1	1	1	1	1	1	1	1	1	1	1	1	1	1	1	1	59	1	1	1	91	1	1	1	1	1	1	1	1	1	1	1	1	1	1	1	1	1	1	1	1	1	1	1	1	1	1	1	1	94	1	1	1	1	1	1	1	1	1	1	1	1	1	1	1	1	1	1	1	1	1	95	1	1	1	1	1	1	1	1	1	6	1	1	1	1	1	1	1	1	1	1	1	1	1	1	1	1	1	1	1	1	1	1	1	1	1	1	6	1	1	1	1	1	1	1-	1	4	1	1	1	1	1	1	1	1	1-	1	1	1	1	1	1	1	1	1	1	1	1	1	1-	1	1	1	1	69	1	1	1	1	1	1	1	1	1	1	1	1	1	1	1	1	1	1	1	1	1	1	1	1	1	1	1	1	64	1	1	1	1	1	1	1	1	1	1	1	1	1	1	1	1	1	3	1	1	1	1	1	1	1	1	3	1	1	1	7	1	1	1	1	1	1	1	1	1	1	1	1	50	1	1	1	1	1	1	1	1	1	1	1	1	1	1	1	1	1	1	1	1	1	1	1	1	1	1	1	1	1	1	1	1	1	1	1	1	1	1	1	1	1	74	1	1	3	1	1	1	1	1	1	1	1	1	1	1	1	1	1	1	1	6	1	1	1	1	1	1	6	6	6	6	6	6	9	2	6	1	2	5	1	1	84	141	1	1	1	1	13	1	1	1	1	1	1	1	1	58	1	1	1	1	1	1	1	1	1	1	90	1	1	1	1	1	1	1	1	1	63	1	1	1-	68	1	1	1	1	1	1	1	1	1	1	1	71	1	1	1	1	1	1	1	1	1	1	12	1	78	1	1	79	1	1	1	1	1	1	13	N	1	N	1	1	1	1	1	1	1	1	1	1	1	1	1	1	1	1	14	1	1	1	49	1	1	85	1	1	1	1	53	1	1	1	1	1	1-	1	1	1	1	1	90	1	1	1	1	1	1	88	1	1	1	1	13	1	1	1	13	1	1	1	1	1	1	1	1	1	1	1	1	1	1	1	1	1	73	1	1	1	1	1	1	1	1	1	N	1	1	1	1	1	1	1	1	1	13	66	1	1	1	1	1	1	1	1	1	1	1	1	1	1	1	1	1	1	1	12	1	1	1	1	1	1	1	1	1	1	1	1	92	73	1	1	1	1	1	1	1	1	1	1	1	1	1	0	0
GCA_000810625.3_ASM81062v3_genomic.fna	4	6	6	6	6	1	2	1	6	6	2	6	3	3	6	6	6	6	12	6	1	5	6+	6	3	6	6	5	5	6	11	5	6	6	5	5	6	6	6	6	5	6	6	6	6	6	6	6	3	6	6	6	5	6	12	14	14	14	1	1	13	13	13	12	13	6	6	89	6	93	6	6	6	6	6	6	6	6	6	6	6	6	6	6	6	6	6	6	6	6	6	6	45	6	5	6	6	6	6	5	6	5	6	5	5	6	6	6	5	6	6	6	3	5	1	1	2	5	2	6	4	6	6	6	5	6	6	6	6	6	5	6	6	N	6	6	4	6	6	6	6	5	5	5	6	6	5	6	5	6	6	6	6	6	5	6	1	1	1	1	13	1	1	1	1	6	6	99	5	5	6	4	1	1	1	6	1	1	1	1	1	1	1	1	1	1	1	1	1	1	1	1	1	1	1	6-	4	1	1	1	1	1	1	1	1	1	1	1	1	1	1	1	1	1	1-	1	1	1	1	1	1	1	1	1	71	1	1	1	6	1	1	1	1	1	1	1	1	1	1	1	1	1	1	1	1	1	1	1	1	1	1	1	1	1	1	1	1	1	1	1	1	1	1	1	1	1	1	1	1	1	1	1	1	1	1	6	1	1	1	1	1	1	1	1	1	1	1	1	1	1	1	1	1	1	1	1	1	1	1	1	1	1	1	1	1	1	1	1	1	1	1	1	1	1	1	1	1	1	1	1	1	1	1	1	1	1	1	1	1	1	1	1	1	1	1	1	1	1	1	1	1	1	1	1	1	1	1	1	1	1	1	1	1	1	1	1	1	1	1	1	1	1	1	1	1	1	1	1	1	1	1	1	54	1	1	1	1	1	1	1	1	1	1	1	1	1	1	1	1	1	1	1	1	1	1	6	1	1	1	1	1	1	1	1	1	1	1	1	1	1	1	1	1	1	1	1	1	6	13	1	1	1	1	1	1	1	1	1	1	1	1	1	1	1	1	1	1	1	1	1	1	1	1	1	1	1	1	1	1	1	1	1	1	1	1	1	1	1	1	1	1	1	1	1	1	1	1-	1	1	1	1	1	1	1	1	1	1	1	1	1	1	1	1	6	N	1	1	1	1	1	1	1	1	1	1	1	1	1	1	1	1	1	1	1	1	1	1	1	1	1	1	1	1	1	1	1	1	1	1	1	1	1	1	1	1	1	1	1	6	1	1	1	1	1	1	1	1	1	1	3	1	1	1	1	1	1	1	1	1	1	1	1	1	1	1	1	1	1	1	1	1	1	1	1	1	1	1	1	1	1	1	1	1	1	1	1	1	1	1	6	1	1	1	1	1	1	1	1	6	1	1	1	6	1	1	1	1	1	1	1	1	1	1	1	1	1	1	1	1	1	1	1	1	34	1	1	1	1	1	1	1	1	1	1	1	1	1	1	1	1	1	1	1	1	1	1	1	1	1	1	1	1	1	1	1	1	6	1	19	1	12	11	11	N	10	12	147	13	11	12	11	11	50	13	13	1	1	1	1	1	1	1	1	1	1	1	1	1	1	1	1	1	1	1	1	1	1	1	1	1	1	1	1	1	1	1	6	1	6	1	1	1	1	1	1	1	1	1	1	1	1	1	1	1	1	1	49	1	1	1	1	1	1	1	1	1	1	1	1	1	1	1	1	1	1	1	1	1	1	1	1	1	1	1	1	1	1	1	1	6	1	1	52	1	1	1	1	1	1	1	1	1	1	20	1	1	1	45	1	1	1	1	1	1	1	1	1	1	1	1	82	1	1	1	1	1	1	1	1	1	1	1	6	1	1	1	1	1	1	1	1	1	1	1	1	1	1	1	1	1	1	1	1	1	6	1	1	1	1	1	1	1	1	1	1	1	1	1	1	1	1	1	1	1	1	1	1	1	1	1	1	1	1	1	1	1	1	1	1	1	1	1	1	1	1	1	1	1	1	1	1	1	1	1	1	1	1	1	1	1	1	6	1	1	1	1	1	1	1	1	1	1	6	1	1	1	1	1	1	1	1	1	1	1	1	1	1	1	1	1	1	1	1	1	1	1	1	1	1	1	1	1	1	1	1	1	1	1	1	1	1	1	1	1	1	69	1	1	1	1	1	1	1	1	1	54	1-	1	1	1	1	1	1	1	1	1	1	1	1	1	1	1	1	1	1	1	1	1	1	1	1	6	1	1	1	1	1	1	1	1	1	1	1-	6	1	1	1	1	1	1	1	1	1	1-	1	1	1	1	1	1	1	1	1	1	1	1	1	1	1	1	1	102-	1	1	1	1	1	1	1	1	1	1	1	1	1	1	1	1	1	1	1	1	1	1	1	1	1	1	1	1	1	1	1	1	1	1	1	1	1	1	1	1	1	1	1	1	6	1	1	1	1	1	1	1	1	1	1-	1	1	1	1	1	1	1	1	1	1	1	1	1	1	1	1	1	1	5	1	1	1	1	1	1	1	1	1	1	1	1	98	1	69	1	8	1	1	1	1	1	1	1	1	1	1	1	1	41	6	1	1	1	1	1	1	1	1	1	1	1	1	1	1	1	1-	1	1	1	1	1	1	1	1	1	1	1	1	1	1	1	1	1	1	1	1	1	1	1	1	1	1	1	1	1	1	1	1	1	1	1	1	1	1	1	1	1	1	6	438+	51	1	1	1	1	1	1	1	78	1	1	74	1	1	1	1	1	1	1	1	1	1	1	1	1	1	1	1	1	25	1	1	1	106	1	1	75	1	1-	1	1	1	1	1	1	1	1	1	1	1	1	1	1	1	6	1	1	1	1	1	1	1	1	1	1	1	1	1	1	1	1	1	1	1	1	1	1	1	1	1	1	1	1	1	1	1	1	1	43	1	40	1	1	1	1	1	1	6	1	1	1	1	1	1	1	1	1	1	1	1	1	1	1	1	1	1	1	1	1	1	1	1	1	1	1	1	1	1	1	1	6	1	1	1	1	1	1	1	1	1	1	1	1	1	1	1	1	1	1	1	1	1	1	1	1	1	1	1	1	1	1	1	1	1	1	1	1	1	1	1	1	1	1	1	1	6	1	1	1	1-	1	1	1	1	1	1	1	1	1	1	1	1	1	1	1	6	1	1	1	1	1	1	1	1	6	1	1	1	1	1	1	1	48	1	1	1	1	1	1	1	1	1-	1	1	1	1	1	1	1	1	1	1	1	1	1	1	1	6	1	1	1	1	1	6	1	1	1	1	1	1	1	1	1	1	1	1	1	1	1	23	1	1	1	1	1	1	1	1	1	1	1	1	1	1	1	6	1	1	1	1	1	66	1	1	1	1	1	1	1	1	6	1	1	1	1	1	1	1	1	1	1	1	1	1	1	1	1	1	1	1	1	1	1	1	1	1	1	1	1	1	1	1	1	1-	1	1+	1	1	1	1	1	1	1	1	6	1	1	1	1	73	3	1	1	1	1	1	1	1	1	1	1	1	1	1	1	1	1	1	1	1	1	1	1	1	1	1	1	1	1	1	1	1	1	1	1	1	1	1	6	1	1	1	6	1	1	1	1	1	1	1	1	1	1	1	1	1	1	1	1	1	1	1	55	1	1	1	1	1	1	1	6	5	5	5	6	78	5	5	5	5	6	5	4	5	5	1	6	6	1	1	6	6	5	5	5	1	1	1	1	1	1	1	1	84	1	1	1	1	1	1	1	1	1	1	1	1	1	1	1	1	1	1	1	1	1	1	1	1	1	1-	1	1	1	1	1	1	1+	1	1	1	6	1	1	1	1	1	1	1	1	1	1	1	1	5	1	1	1	1	1	1	1	1	1	1	1	1	1	1	1	1-	1	1	1	1	1	1	1	1	1	1	1	1	1	1	1	1	1	1	1	1	1-	1	1	1	1	1	1	1	1	1	1	1	1	1	1	1	1	6	1	1	1	1	52	1	1	1	1	1	1	1	1	1	1	1	1	1	1	1	1	1	1	1	1-	1	6	1	1	1	1	1	56	1	1	1	1	1	1	1	1	1	1	1	1	1	1	1	1	1	1	1	1	6	1	44	1	1	1	1	1	1	1	1	1	1	1	1-	1	80	1	1	1	1	1	1	1	1	1	1	1	6	1	1	1	1	1	1	1	1	1	1	1	1	1	1	1	1	1	1	1	1-	111	1	1	1	1	1	71	1	1	1	1	1	1	1	1	1	1	1	1	1	1	1	1	1	1	1	1	1	1	1	1	1	1	1	1	1	1	1	1	1	1	1	1	1	1	1	1	1	1	6	1	1	1	1	1	1	1	1	1	1	1	1	1	1	1	1	1	1	1	1	1	1	1	1	1	1	1	1	1	1	1	1	1	1	1	1	1	1	1	1	1	1	1	1	1	1	1	1	1	1	1	1	1	1	1	1	1	1	1	1	1	1	1	1	1	1	1	1	1	1	68	1	1	1	1	1	1	1	1	1	1	6	1	1	1	1	1	1	1	1	1	1	1	1	1	1	1	1	1	1	1	1	1	1	1	1	1	1	6	1	1	1	1	1	1	1	88	4	1	1	1	1	1	1	1	1	89	1	1	1	1	1	1	1	1	1	1	1	1	34	6	1	1	1	1	1	1	1	1	1	1	1	1	1	1	1	1	1	1	1	1	1	1	1	1	1	1	1	1	1	1	1	1	1	1	63	1	1	1	1	1	1	1	1	1	1	1	1	1	1	1	27	3	1	1	1	1	1	1	1	1-	3	1	1	1	1	1	1	1	1	1	1	1	1	1	1	1	1	1	1	1	1	1	1	1	1	1	1	1	1	1	1	1	1	1	1	1	1	1	1	1	1	1	1	1	1	1	1	1	1	80	1	1	1	1	1	1	1	1	1	1	1	1	3	1	1	1	1	1	1	1	1	1	1	1	1	1	1	1	1	6	1	1	1	1	1	1	6	6	6	33	6	6	9	2	6	1	2	5	1	1	1	6	6	6	3	6	6	6	6	6	6	6	6	6	6	67	1	5	6	1	6	6	6	5	6	6	6	6	6	6	6	6	21	6	6	6	6	6	6	6	6	6	6	6	6	6	6	6	57	6	6	6	6	6	6	6	6	6	6	6	3	3	3	3	3	3	3	3	3	3	6	3	3	3	3	6	3	92	6	12	6	6	4	6	6	6	6	6	6	6	5	5	6	6	6	13	6	6	6	5	1	6	6	6	6	3	5	6	6	6	6	6	4	6	6	6	4	5	6	6	6	5	3	6	5	6	6	6	6	6	6	6	6	6	6	6	6	6	6	6	6	6	6	160+	6	6	2	1	6	6	6	3	3	6	6	6	6	6	6	6	5	5	5	5	13	6	6	6	6	42	6	6	6	6	5	5	5	4	6	6	5	6	5	2	5	6	6	6	2	6	6	6	6	6	6	6	6	6	3	6	13	6	6	6	6	6	6	6	6	6	4	5	5	6	6	5	5	6	6	6	13	6+	0	0
GCA_000968965.1_ASM96896v1_genomic.fna	3	46	N	2	N	2	9	1	N	N	1	N	2	N	49	N	N	N	39	326	2	57	50	64	2	2	70	24	43	50	2	24	52	38	36	2	94	2	68	20	34	2	43	2	2	10	64	3	20	2	8	2	2	23	2	98	101	2	1	92	77	226	87	89	94	134	65	123	56	73	81	10	120	58	38	29	30	91	58	45	62	99	26	40	102	95	88	68	86	47	47	2	N	N	N	31	N	N	2	2	N	2	2	2	2	N	N	2	192	N	66	N	1	N	N	1	2	140	N	60	4	6	6	6	5	6	N	N	6	N	5	6	6	N	51	N	4	N	6	N	N	95	5	5	6	N	5	6	5	N	N	6	N	10	9	9	1	1	1	1	13	1	1	1	1	6	6	5	5	5	6	60	1	1	1	6	1	1	1	1	1	1	1	1	1	1	1	1	1	1	1	1	1	1	1	1	4	1	1	1	1	1	1	1	1	1	1	1	1	1	1	1	1	1	1	1	1	1	1	1	1	1	1	1	1	1	1	1	6	1	1	1	1	1	1	1	1	1	1	1	1	1	1	1	1	1	1	1	1	1	1	1	1	1	1	1	1	1	1	1	1	1	1	1	1	1	1	1	1	1	1	1	1	1	1	6	1	1	1	1	1	10	1	1	1	1	1	1	1	1	1	1	1	1	1	1	1	1	1	1	1	1	1	1	1	1	1	1	1	1	1	1	1	1	1	1	1	1	1	1	1	1	1	1	1	1	1	1	1	1	1	1	1	1	1	1	1	1	1	1	1	1	1	1	1	1	1	1	1	1	1	1	1	1	1	1	1	1	1	1	1	1	1	1	1	1	1	1	1	1	1	1	1	1	1	1	1	1	1	1	1	1	1	1	1	1	1	1	1	1	1	1	1	1	1	6	1	1	1	1	1	1	1	1	1	1	1	1	1	1	1	1	1	1	1	1	1	6	13	1	1	1	1	1	1	1	1	1	1	1	1	1	1	1	1	1	1	1	1	1	1	1	1	1	1	1	1	1	1	1	1	1	1	1	1	1	1	1	1	1	1	1	1	1	1	1	1	1	1	1	1	1	1	1	1	1	1	1	1	1	1	1	1	6	1	1	64	1	1	1	1	1	1	1	1	1	1	1	1	1	1	1	1	1	1	1	1	1	1	1	N	1	1	N	1	N	1	59	N	N	N	N	N	N	1	N	N	N	N	N	1	N	1	1	224	1	1	1	N	3	N	N	1	N	1	N	1	1	211	1	N	210	1	N	1	240	N	1	N	N	N	1	1	1	1	1	1	1	N	1	1	1	1	N	1	N	N	N	N	N	N	1	N	N	1	91	N	1	6	1	1	1	N	1	1	N	1	N	N	1	1	N	1	N	1	1	1	1	1	N	1	207	N	1	N	1	1	N	162	1	1	63	N	N	N	1	1	N	N	N	1	N	N	1	1	1	1	1	1	N	1	1	1	N	1	1	6	N	N	0?	N	N	4	N	N	6	N	97-	4	11	N	N	11	13	N	1	1	1	1	N	N	N	N	N	1	182	N	1	1	1	N	N	N	N	1	1	1	N	N	1	N	1	1	207	1	N	N	1	6	1	N	1	1	1	1	1	N	1	N	N	1	N	1	1	1	1	N	N	N	N	235	1	1	N	1	1	N	1	N	1	1	1	1	N	N	N	1	1	1	N	1	1	N	1	1	1	1	29	N	6	1	1	134	1	1	N	1	1	1	N	N	N	1	N	1	N	215	N	1	1	0?	0?	1	N	N	1	1	1	1	1	N	1	1	N	1	1	1	N	1	N	1	1	6	1	N	1	1	1	1	N	1	1	1	1	1	1	N	1	N	1	1	1	N	1	6	N	1	1	N	1	1	N	1	1	1	N	N	115	N	1	211	1	N	1	1	1	1	1	N	N	1	1	1	1	1	1	N	1	1	1	1	N	1	1	1	N	1	19-	1	1	1	N	N	N	1	1	1	1	1	1	237	64	N	1	1	1	1	1	1	N	N	1	N	1	1	1	N	1	1	1	N	1	N	N	1	1	1	1	N	1	1	N	1	1	N	1	1	1	1	N	N	1	1	1	1	1	1	1	1	1	N	N	1	N	1	1	N	1	1	1	1	N	1	1	1	1	1	1	1	109	N	1	1	1	1	N	N	N	1	243	1	1	N	1	1	N	N	1	1	1	60	N	N	N	N	N	1	1	N	1	1	1	N	6	1	1	1	N	1	1	N	1	N	N	N	1	1	1	1	1	1	N	N	1	N	1	N	1	1	1	1	1	1	1	N	N	1	1	1	N	1	N	1	1	1	1	1	1	64	1	1	N	N	1	N	1	N	1	1	N	1	1	N	N	1	1	N	1	183	N	N	1	1	1	1	1	153	1	1	1	1	N	N	1	1	1	N	1	N	1	N	N	1	1	1	1	1	N	1	1	1	1	1	1	1	5	N	1	1	1	1	1	1	1	N	1	1	1	1	205	1	N	8	1	N	1	220	N	1	220	1	1	N	1	1	1	N	1	161	N	162	1	1	N	1	N	1	1	1	1	1	N	220	1	N	1	1	1	1	1	N	1	12	N	1	1	1	N	1	N	N	1	1	N	N	1	1	1	1	N	1	1	1	1	N	237	1	1	1	N	1	N	1	1	1	6	1	N	N	1	N	1	1	1	N	229	1	1	1	1	1	N	1	1	N	1	N	1	1	N	N	N	161	1	N	N	1	1	1	1	1	1	1	N	N	N	N	N	1	N	1	1	1	1	1	1	50-	N	1	1	1	6	1	1	1	N	N	1	N	230	1	N	1	N	1	N	N	1	N	1	251	N	N	1	1	1	209	N	N	1	1	1	1	1	1	N	N	1	N	115	1	1	N	1	N	N	1	1	1	126	1	N	1	N	N	1	N	1	1	1	1	1	1	1	N	1	1	1	240	1	N	N	1	N	1	1	1	6	N	N	1	N	1	1	1	N	N	N	1	1	N	1	1	1	1	1	1	1	1	N	N	N	N	N	N	1	N	1	1	1	1	1	N	1	1	1	1	1	N	1	N	N	255	1	1	251	1	N	N	N	67	N	1	188	1	1	1	1	1	1	1	N	N	N	1	1	N	N	1	N	242	236	N	1	1	N	N	1	N	N	N	1	1	1	N	N	63	N	1	1	N	N	N	1	1	1	N	N	1	N	N	1	N	1	6	1	1	1	N	N	6	1	1	N	1	1	1	N	N	1	1	1	1	1	N	1	1	N	1	1	1	1	1	1	302	1	N	1	1	N	163	1	208	N	N	1	1	N	1	1	1	1	1	1	N	N	N	6	1	1	N	1	1	1	1	1	N	1	1	1	1	1	148	1	1	1	N	1	1	1	N	1	N	N	1	N	N	0?	N	N	N	1	1+	N	N	N	1	N	1	211	1	N	1	185	N	N	N	N	N	1	1	1	1	1	N	1	1	1	1	1	1	1	1	1	1	N	1	1	N	1	1	N	1	1	1	1	1	N	1	1	1	1	N	N	1	N	1	1	1	N	1	6	1	N	N	1	N	N	1	1	1	N	1	N	1	1	1	1	1	1	1	N	1	1	N	N	1	N	5	5	N	6	5	5	N	5	N	6	5	4	N	N	N	N	N	N	1	N	N	5	5	N	1	N	N	N	N	N	N	N	1	1	N	N	N	1	N	1	1	N	1	1	1	202	N	1	N	N	1	1	N	1	N	1	1	1	1	N	1	N	1	N	1	N	1	N	179	6	N	N	1	N	N	176	N	1	N	1	1	N	N	1	1	1	1	1	1	N	1	N	1	1	190	N	N	1	N	1	1	1	1	1	N	1	1	1	N	N	1	N	N	N	N	N	1	1	1	N	1	1	N	1	1	1	1	N	1	1	1	1	N	1	16	N	6	1	1	1	1	1	N	N	N	1	1	1	1	1	1	1	1	1	1	1	1	1	301	N	N	N	1	6	1	1	1	1	1	N	1	1	1	N	1	1	N	1	N	1	N	N	1	N	1	N	N	1	1	1	N	1	1	1	N	N	1	1	N	N	1	1	1	1	1	N	6	1	1	309	N	1	N	N	1	1	N	1	N	N	162	70	1	40	N	N	0?	2	2	60	N	2	2	2	2	2	2	42	N	108	2	2	2	2	N	69	N	55	230	N	2	N	N	N	5	N	1	2	32	26	31	5	1	N	23	N	25	N	N	27	N	34	N	N	35	1	1	1	N	N	69	N	N	58	2	2	2	52	67	50-	N	N	10	N	N	60	44	N	N	N	N	66	73	65	60	57	75	N	N	57	2	N	3	N	32	N	81	N	166	44	78	2	2	70	3	2	30	86	2	75	63	2	2	2	1	2	2	45	62	21	2	8	51	9	2	2	2	20	19	8	33	30	33	35	8	60	15	21	19	38	9	6	9	8	4	2	8	2	2	2	9	8	7	8	9	9	37	10	2	9	54	9	9	10	9	10	2	156	2	2	2	2	2	9	8	9	8	10	9	8	8	1	N	37-	N	86	N	N	N	9	N	N	8	N	N	N	N	9	9	154	N	N	1	77	N	9	6	3	3	73	N	14	56	N	52	N	N	N	9	N	N	1	3	N	5	N	2	N	7	2	2	2	9	N	N	46	10	8	9	2	N	6	2	N	2	2	N	2	N	2	1	N	N	7	2	N	4	N	10	N	2	2	1	1	1	8	2	N	1	N	N	1	1	1	1	1	1	1	4	1	1	1	6	1	2	56	1	8	10	9	8	9	N	10	N	9	N	8	10	N	1	9	2	6	8	5	54	2	N	2	2	N	N	2	2	2	8	N	2	9	9	7	9	2	2	2	2	155	9	2	2	2	2	106	9	N	N	195	30	46	N	38	N	N	N	160	N	N	2	N	221	1	2	1	1	2	202	9	2	52	N	2	2	1	2	1	1	23	N	1	N	N	10	9	4	156	N	N	N	258	N	10	11	N	N	N	5	N	N	4	N	0?	0?	32	0?	51	78	10	9	10	11	10	10	10	9	10	9	10	9	10	10	10	73	10	N	1	11	10	9	10	10	70	201	77	10	N	10	10	60	10	9	9	N	N	N	N	7	32	N	N	46	N	9	9	N	N	N	9	2	51	N	N	8	9	61	N	39	N	N	N	2	9	1	240	58	N	9	8	9	N	1	229	79	10	N	2	5	N	16	198	166	9	8	35	10	9	N	8	N	N	N	N	1	10	N	2	N	N	N	2	2	N	2	77	N	N	48	N	71	199	55	N	88	10	2	186	2	2	10	2	2	1	3	15	2	2	1	81-	2	83	84	83	58	69	55	69	81	63	34	62	65	18	228	2	2	2	2	4	13	25	67	60	2	2	56	6	63	41	4	26	68	82	N	53	50	35	25	25	1	16	2	2	70	10	58	44	56	81	2	2	2	65	2	2	2	2	2	2	2	2	2	13	0	0
GCA_001420305.1_ASM142030v1_genomic.fna	N	8	N	N	N	2	N	1	17	N	2	N	1	7	N	7	8	8	N	N	7	6	N	8	2	8	8	2	7	N	3	7	N	N	N	7	9	N	N	9	8	N	N	N	9	N	234	8	4	79	N	N	N	120	9	260	9	9	3	9	8	N	221	19	8	9	9	9	338	N	8	8	N	200	N	N	N	330	N	N	N	276	8	N	N	8	N	N	8	N	8	8	7	N	N	8	N	N	8	N	8	N	N	116	N	8	N	8	N	8	N	54	3	N	1	N	1	10	N	27	1	10	10	N	N	N	N	3	N	N	N	9	N	N	11	11	8	N	11	192	11	N	1	176	11	11	10	N	11	22	N	78	206	10-	16	N	29	3	N	N	N	N	11	3	N	11	11	10	N	N	N	8	10	11	N	N	2	N	N	N	10	170	3	10	9	N	10	30	10	N	N	9	10	N	N	181	3	2	N	10	10	27	10	10	1	1	1	6	5	N	N	276	N	1	N	1	N	N	10	10	N	N	N	10	N	N	N	N	11	N	9	N	10	10	10	11	N	195	N	11	N	11	10	N	N	N	N	113	8	N	11	3	N	8	N	N	11-	N	N	135	10	9	N	N	N	276	N	N	1	27	24	N	N	24	51	N	187	N	1	1	11	N	1	N	1	N	28	N	N	N	9	9	5	1	10	10	N	179	N	9	158	N	N	N	9	N	N	N	N	10	N	10	1	N	10	N	10	3	184	1	144	10	N	N	N	N	N	10-	N	N	8	10	1	28	1	1	N	10	N	N	6	N	7	4	N	N	1	N	N	N	3	5	9	225	N	N	10	N	10	N	8	N	103	212-	N	7	N	N	N	10	N	10	10	10	215	N	N	9	N	25	10	10	10	10	10	N	N	10	3	8	N	N	10	N	9	11	9	4	6	10	10	10	10	10	214	10	10	85	N	9	220	4	9	10	N	10	N	250	11	10	8	147	10	8	N	10	4	10	N	151	96	N	8	N	44	9	9	N	10	8	9	7	3	2	10	N	1	9	97	N	16	1	N	N	202	N	10	N	N	N	3	N	10	189	8	N	N	N	7	11	11	10	4	1	N	10	10	195	136	N	N	3	10	12	26	10	N	11	N	N	8	11	11	N	N	N	11	N	9	11	N	10	N	45	N	83	N	10	10	N	41	1	10	252	4	211	58	1	11	9	9-	N	2	4	4	8	10	23	11	N	9	N	N	1	225	N	10	N	1	3	N	1	N	9	N	10	N	10	212	N	11	N	N	N	N	241	N	10	3	N	188	N	N	196	11	N	4	3	6	10	4	3	1	8	4	N	N	N	10	11	226	N	9	N	1	1	N	7	10	9-	N	N	11	10	10	N	3	237	10	N	11	210	2	N	10	10	N	10	N	1	N	N	11	11	9	N	N	67	N	3	2	3	87	11	N	N	11	10	N	N	10	44	56	9	N	5	N	10	11	289	N	54	12	11	209	N	N	N	11	11	52	N	1	N	1	1	330	N	N	N	N	0?	N	232	N	N	40	1	11	11	N	1	N	N	N	N	11	9	N	3	N	11	N	N	9	N	N	N	N	N	N	N	10	N	N	135	205	10	N	8	N	N	10	N	10	10	10	9	215	N	9	N	1	3	4	9	6	N	N	6-	11	172	9	N	N	7	N	5	9	10	10	12	N	N	N	N	9	N	11	N	N	11	112	249	10	6	N	N	196	N	6	N	N	10	N	9	N	5	10	N	N	9	N	N	10	N	218	N	N	198	N	N	2	N	9	9	1	9	1	N	N	N	6	N	N	10	N	3	N	251	N	9	245	N	9	10	10	10	10	N	10	2	8	7-	7	1	N	10	N	N	N	10	10	8	276	9	N	9	8	N	N	10	2	7	1	N	10	117	N	7	N	10	N	200	10	10	8	10	N	11	10	10	N	10	2	N	267	N	N	N	N	N	9	N	N	9	186	10	81	N	N	10	N	N	10	180	10	212	3	11	N	11	198	10	N	61	10	10	N	N	6	N	11	N	10	N	N	2	N	10	9	N	10	239	N	N	N	10	10	158	6	N	N	7	N	N	N	N	1	10	N	9	N	340	N	36+	9	11	10	10	N	280	N	10	N	N	N	N	10	N	10	11	28	10	63	N	11	N	N	N	11	219	6	9	9	10	N	10	9	246	N	N	10	N	10	10	1	5	159	N	10	N	11	9	N	11	N	N	10	N	10	219	10	4	9-	N	4	N	182	1	9	N	N	N	9	9	41	N	N	8	N	N	N	9	10	155	N	N	7	10	N	N	9	6	1	N	10	N	N	1	N	N	N	10	N	12	6	146	8	N	N	N	2	N	N	6	11	N	N	N	N	11	147	N	10	11	113	7	N	N	11	N	3	N	10	N	N	11	N	11	10	10	N	3	N	11	N	N	N	N	N	N	N	10	11	5	N	N	N	N	10	N	11	N	N	34	8	N	4	2	10	N	2	N	9	N	11	N	11-	92	N	N	N	123	11	N	N	11	2	N	N	194	N	N	11	N	11	N	27	12	3	N	10	10	10	3	3	10	6	9	7	N	11	3	N	10	10	N	9	N	9	9	N	11	N	11	10	N	N	11	11	N	N	11	11	N	181	11	N	N	N	N	10	71	N	11	9	277	11	N	N	208	10	2	24	N	N	202	N	N	N	5	N	N	N	10	4	N	N	10	N	11	9	N	N	10	N	10	9	N	221	10	10	10	10	6	N	N	N	8	305	N	N	N	N	10	11	N	N	10	N	10	304-	N	10	N	N	N	N	10	11	N	9	44	10	6	233	N	10	N	190	10	10	N	N	10	N	N	10	6	N	10	9	9	9	9	10	69	N	N	10	10	N	10	N	N	N	10	10	N	11	2	10	N	11	N	N	10	N	N	10	N	10	2	N	5	10	N	2	2	N	5	N	3	2	4	N	10	10	1	10	N	N	10	10	1	N	155	N	N	6	N	2	N	10	200	N	N	N	28	64	6	8	N	N	N	N	9	56	N	N	N	N	1	9	10	N	N	N	9	4	N	10	6	1	N	10	18	N	7	11	2	257	N	10	N	155	N	N	10	1	N	10	9	N	1	N	N	N	10	N	N	188	N	N	10	N	N	10	10	N	11	9	10	N	N	N	7	11	9	N	N	7	3	8	2	9	223	N	8	8	N	1	10	N	N	N	10	10	10	N	N	10	9	N	N	N	181	10	N	11	10	10	10	N	10	9	7	N	N	N	N	4-	10	10	10	1	N	N	N	10	N	N	177	N	10	9	N	10	N	N	9	11	11	10	N	9	10	N	N	10	N	N	12	N	N	9	N	N	N	N	N	N	1	1	1	146	N	10	10	10	262	N	10	N	N	10	1	10	N	N	N	10	10	N	N	N	N	10	10	N	N	N	4	8	N	N	N	N	N	9	98-	N	N	N	10	10	1	5	N	11	10	33	N	178	9	N	8	N	N	1	N	N	2	5	N	8	1	N	N	N	1-	N	1	N	10	N	10	1	1	N	N	206	1	N	N	N	10	2	N	10	10	N	N	N	10	N	N	10	10	9	N	N	2	1	9	N	N	N	N	N	1	10	N	N	N	10	223	3	10	N	N	N	N	218	10	6	11	N	N	9	10	N	263	N	11	N	N	281	N	2	N	N	N	10	10	198	N	N	N	235	N	N	N	N	N	229	10	N	263	259	11	11	10	N	N	149	N	2	11	9	8	9	9	N	8	9	10	8	N	6	9	8	9	9	N	N	155	210	245	N	N	N	N	9	N	8	N	N	9	10	10	N	N	10	N	10	10	10	195	9	N	193	N	N	N	N	N	8	N	N	N	25	N	N	N	10	N	N	11	20	N	10	N	N	10	N	185	1	N	N	N	9	N	10	N	1	10	N	33	N	N	10	10	11	10	N	N	10	N	40	N	N	N	7	5	5	N	5	N	110	76	N	8	4	10	N	194	25	9	1	N	9	N	9	1	N	N	9	N	9	N	8	9	9	7	N	10	9	N	10	185	N	N	165	N	N	N	N	57	N	10	N	N	N	2	N	10	191	40	10	8	N	N	N	10	38	N	7	N	N	N	10	N	9	10	N	N	N	N	1	N	10	N	0?	N	1	N	24	19	7	N	N	N	5	N	10	N	8	82	10	N	207	9-	N	9	N	N	N	9	9	N	N	N	N	3	7	7	N	N	1	N	1	10	N	10	N	9	N	N	N	8	N	N	1	N	10	N	10	N	10	9	N	8	N	N	N	N	N	N	N	N	N	10	N	10	5	239	N	9-	10	10	26	N	11	N	N	233	1	N	N	2	N	2	N	N	11	64	N	169	N	N	3	160	N	N	5	N	9	6	N	N	11	N	10	N	N	5	3	4	113	N	N	N	6	5	10	9	N	N	N	175	9	N	N	1	1	10	N	160	N	9	4	N	9	N	7	N	N	N	154	9	10	10	10	169	81	N	10	10	10	11	10	9	9-	N	6	N	152	8	N	N	9	83	9	N	10	9	9	9	217	0?	150	10	N	9	N	N	N	N	9	N	1	10	10	196	10	155	N	8	5	213	1	3	N	6	8	N	10	N	N	N	179	N	10	N	N	136	10	1	3	N	6	N	N	N	8	9	9	N	10	10	N	N	N	N	N	N	N	1	9	153	N	9	N	N	220	9	1	8	N	9	8	10	4	N	218	1	82	4	N	1	1	N	N	1	1	1	4	3	N	1	1	N	1	1	1	N	N	1	N	1	2	1	1	N	11	N	109	10	N	11	10	3	N	N	11	7	6	55	7	7	5	9	N	N	11	N	9	205	9	9	N	178	192	9	8	N	N	N	N	9	10	N	N	N	N	9	9	N	2	9	3	N	9	N	N	N	10	10	10	4	133	9	N	N	N	N	10	3	N	N	N	30	N	22	N	22	N	38	27	1	224	16	8	17	82	5	212	N	154	10	5	N	4	N	N	N	N	4	12	N	12	N	1	N	10	7	N	N	N	1	N	N	229	N	N	N	N	11	54	45	38	145	3	42	36	34	N	41	N	N	10	N	N	N	10	N	86	11+	N	N	N	227	11	11	11-	N	10	217	10	10	N	N	N	9	N	201	N	9	10	N	10	N	N	N	N	10	N	N	2	N	11	N	N	N	N	N	3	10	N	11	N	N	N	9	10	9	7	11	N	11	N	9	6	5	11	4	168	184	6	N	11	10	N	N	11	12	N	9	N	N	N	10	N	31	N	11	N	N	10	11	112	N	115	N	11	83	11	N	N	N	10	N	N	3	11	N	10	N	5	10	N	N	N	N	11	11	N	10	N	N	11	N	N	11	N	9	N	N	N	11-	N	9	3	N	9	N	N	179	9	2	10	5	N	N	1	12	11	11	11	11	10	39	104	10	N	N	66	N	N	16	N	N	N	8	N	N	1	N	7	N	8	N	5	8	8	8	N	N	0	0
GCA_001420325.1_ASM142032v1_genomic.fna	41	302	N	20-	19	N	1	1	23	N	1	20	3	42	89-	86	83-	58	49	N	14	33	N	206-	10	127	87	13	5-	22	2	11	N	54	N	5	98-	63	75	54	54	62	N	98-	92	94	104	8	2	80-	116	87	28-	48	N	103	N	27-	3	N	50-	N	55	54	56	142	90	126-	N	277	N	95-	0?	74	67	3	N	N	81	60-	84-	124-	32	10-	110	N	95-	93	N	82-	N	66	1	53	N	N	55-	81-	51	56	18	68	6	N	N	79	87-	76	107	15	16	22	3	5	1	N	1	53-	23	27-	25	67	N	76	95	N	69	N	86	78	10	12	N	0?	19	21	3	19	49	72	N	2	34	N	65	24	18	86-	59-	77-	87	133-	21-	4	15	42	1	12	80-	28	N	N	21	2	19	179	46	36	78-	N	79	49-	65	77	57	66	1	108-	15	83	N	N	1	64	57	74	N	86-	65-	3	73	20	12	20	19	23	1	13	15	20	26-	20-	21	80	1	1	N	1	1	1	448-	0?	20	31	4	N	70	34	39	25	19	12	11	28-	N	61-	82-	64	58	65-	17	40	0?	67	43	N	71	N	1	15	8	39	283-	67	79	N	89-	N	N	43	34	63	N	13	0?	23	0?	N	31-	5	N	8	N	1	0?	N	N	101	1	81-	49	12	53	60	133-	26	N	17	3	1	20-	5	3	N	15	87	21	12	N	11	9	18	N	13	77	87	N	76	36	75	72	N	N	68	52	77	60	55	100	78	81	232	1	106-	66	N	N	1	78	1	20	65	N	21	20-	N	44	70	81	22	20	88-	1	70	27	3	N	21	55	99	2	3	1	N	214	1	29-	19	N	15	3-	5	18	106-	59	33	47	0?	84-	N	5-	1	9	6	N	1	N	113	120	N	76	N	57	95-	96	27	N	39	87	40	0?	47	45	38	42	83	88-	134-	3	7	68	39	67-	0?	7	78-	N	5-	5	71	109	62	11	N	88-	N	69	8	N	126	N	17	1	89	69	86	73	99-	76	69	46	61	66	29-	N	60	4	70	68	70	N	N	44	69	81-	63	13	0?	43	5	53-	0?	1	N	97-	N	1	23	2	N	22-	8-	N	58	N	3	3	3	22	213-	14	N	9	24-	7	9	8	58	7	20	65-	22	4	1	23	17	22	89	43	48	18	52	53	61	65	3	18	49	22	22	6	20	20-	N	26	N	71	N	N	85-	N	80-	74	N	N	84	88-	0?	0?	1	120-	N	77-	N	25	N	19-	17	0?	26	75	86-	47	2	24	20-	67	0?	77	27	6	31-	68	18	0?	68-	66	N	15	3	88-	18	19	20	16	23	15	20	N	N	24	N	N	21	52	24-	17-	N	N	23	19	86	18	84-	68	51	62-	0?	43	67	N	23	1	53	29	1	38	98	65	N	98	60	14	N	1	0?	7-	29	77	N	80	N	23	61	N	2	3	107-	12	N	N	29	64	N	46-	65	1	71-	76	1	1	0?	N	2	54	7	145-	95	N	12	11-	20-	17-	65	66	43	101	3	73	N	44	28	25	19	1	5	N	61	47	107	83	71	65	165	83-	79	71	76	N	191	96	117-	87-	94-	N	73	N	N	76	59	88-	0?	83-	103-	0?	65	31	2	44	89	1	N	223	0?	21	71	N	23	63	12	N	0?	97	75	289-	75	68-	83	N	N	N	N	57	514-	15-	N	84-	77-	87	22	77	87	N	N	78	50	63	67	88	69	54	77	6	36	35-	74	N	73-	32	8	N	72-	9	16	45	13	63	15	N	20	21	73	N	24-	N	N	11	19	21	24	84	26	55	278-	19	29	N	31	N	77-	10	17	57	58	62	27	34	1	55	47	8	71	68	27-	25	19	217	N	N	82-	39	21	2	N	32	19	13	N	1	4	245	50	0?	N	3	19	17	33	N	22-	12	44	N	66	93-	84-	71	64	59	N	N	7	2	15-	15	1-	35	45	84	219	91	75	84	1	28-	17	62	16	39	49	34	N	2	59	5	5	103	116	12	138	93-	2	2	N	64-	48	7	46	0?	80-	N	54-	10-	53	1	N	N	150	74	N	N	100	18	77	13	21	20-	76	82	N	82-	86-	104	72	68	68	70	77	62-	78	7	74	90-	70	72-	62	61	75	78-	81	67	71	86-	20	0?	19	19-	46	N	422-	0?	0?	20	92-	N	N	197	64	250	70	3	19	4	12	N	89	161	120	39	20	185	60	N	134-	34	5	0?	0?	69	76	71	0?	77-	67	80	N	81	N	30	N	N	N	76	12	21	22	75-	73	337-	1	85-	6	3	87	24	44	42	N	29	116	60	N	107-	61	76	68	24	11	71	28	71	132-	77-	N	39	162	N	22	47	N	64	0?	74	4-	18	12-	18	57	N	11	98-	5	60	86	14	40	N	64-	63	25	70	65-	7	31	N	73-	N	191-	0?	26	5-	49	5	2	N	83-	31	9	N	1	N	14	102-	N	20-	22	1	20-	32	21-	11	24	7	N	20	16-	20	14	N	21	0?	38	20	N	20	N	7	10	295-	19	19	64	3	23	N	18	154	N	49-	0?	12	17	N	3	18	19	63	61	90-	22	10	73	81	213	N	25	50	59-	1	50-	0?	65	N	12	0?	7	31	N	31	2	31	58-	N	110-	11	1	90	0?	0?	0?	0?	0?	0?	0?	0?	0?	0?	0?	0?	0?	0?	0?	0?	0?	0?	0?	0?	0?	0?	0?	0?	0?	0?	0?	0?	0?	0?	0?	68-	0?	0?	0?	0?	0?	0?	0?	0?	5	80	3	4	47	82	N	0?	0?	0?	0?	0?	0?	0?	0?	0?	0?	0?	0?	0?	0?	0?	0?	0?	80	19	20	85	94	92	122	72	70	77	79	74	2	3	N	83	83	63	153	241	100	192	0?	78	170-	62	72	42	140	26-	N	53	N	73	69-	0?	72	43	262	95	78	71	20	0?	18	7	131	67	75	0?	66-	N	111-	0?	21	100-	N	79-	92	85	74	N	149-	69	73	84-	0?	51	81	81	79	N	86	33	25	101-	205	53	87	70	80-	N	94-	N	79-	73	53	0?	92	N	N	21	19	N	13	81	0?	0?	21	213-	20-	N	17-	7	23	N	18	96	16	25	12	0?	18	19-	190	29-	1	75	1	21-	24	20	2	16-	2	N	N	3	12	77	11	12	22	7	1	11	3-	118	1-	43	42	0?	67	3	13-	16	20	N	19	2	214	4	0?	20	0?	175	N	20	50	9	1	33	61-	18-	17	20-	17	18	20	N	N	28	29	0?	50-	18	93	69	53	4	18	20	17	N	67	20	19-	19	5	10	14	N	21-	19-	104-	24	0?	N	109-	5	16	69	76	3	1	N	43	N	30	125	20-	N	117-	N	N	2	0?	93	35	89-	99-	64	N	57	N	58	7	70	54	83	66	76	3	3	N	87	N	23	10	2	9	6	19-	18	16	20	20	70	43-	9	19-	N	18-	21	N	74	18-	23	N	N	71	36	19-	N	41	55	3	94-	N	8	10	4	19	18	23	1	N	1	N	44	63	43	74	120	66	124	123	26	N	72	60	N	86	73-	28	70-	N	71	3	59	75	N	33	N	89	59	28-	40	1	31-	2	N	2	1-	0?	59-	N	1	N	12	N	60	110-	5	67	1	1	83-	78	20	19	29	21	16	119	86	106	N	N	319-	67	132	2	35	68	17-	80	6	90	88	99	173	N	67	67	7	1	1	N	176	N	N	20	N	15	58	49	43	N	1	1	15	10	1	21	16	6	N	66	20	87	N	6-	58	N	16	94	1	70	N	44	83-	N	N	336	19-	87-	12	0?	0?	0?	0?	131	218-	0?	87-	72	60	N	N	16	28	20	1	17-	16	23	N	21	1	N	5	N	27-	70	64-	94-	10	4	74-	51	83	240	21-	N	N	76	32	1	57	72-	N	0?	0?	11	155	10	0?	N	2	9	N	19	N	188	197	174	181	0?	98-	82-	81-	254	95-	88	228	74	79	262	258	81-	75	84	32-	N	19	N	1	69	25	9	62	40	5	36	N	42	N	25	N	N	18	6	71	24	23-	21-	87	0?	53	117	81	72	N	20-	175	17	121	18	N	20-	20	17	19	15	62	75	61	84	31	7	N	10	167-	83-	N	N	37	N	N	6	71	87	65	218	161	71-	N	128-	140	61	71	77	N	0?	125	N	12	N	4	40	66	64-	5	74	23	36	N	53	79-	6	82-	80-	53	29	2	12	71	59	44-	41-	69	75	7	65-	133	45	72	57	8	5	N	2	2	21	111-	193	59	84-	9	59	31	79	42	6	30	24	46	19	44	66	N	N	67	60	N	161	50-	83	N	80	81	154	164	29	74	54	N	122-	21-	N	97	64	78	2	N	77	84-	0?	81	41	N	128	92	N	80	127-	N	4	85	12	150	N	0?	45-	114-	81	80	40	1	41	86-	N	0?	N	27	67	69	12	N	58	104	1	5	N	75	121-	4	37	41	7	137	19	24	62-	N	18-	18	18	21	0?	N	21-	1	1	0?	17	N	N	1	21-	4	19	5	21	18	15	1	76	78	N	N	1	1	N	N	95-	77-	0?	N	7	59	44	N	61-	0?	N	87	N	21	N	3	3	N	3	18	66-	N	N	82	N	67	N	83	N	68	N	2	N	60	67-	66	1	N	N	95	9	0?	73	63-	N	24	72	77-	97	8	N	N	N	33	72	1	70	23	0?	N	80	7	8	58	N	N	70-	7	2	22	8	42	55	61	174	N	67	2	6	7	75-	100	159	104-	N	18	38	67	28	35	92	0?	N	N	N	69	9	11	N	25-	242	61	69-	N	N	58	9	27-	10	52	68	72	50	N	N	60-	84-	3	84	96-	54	118-	27	48	N	41	57	N	N	N	3	N	69	58	63	1	N	64	85	N	71	69	48	2	87	1	13-	11	N	11	80	23	N	186	N	72	N	123	27	40	N	70	11-	10	39	3	50	64	47-	N	60	47	10	54	41	84-	77	63	N	69	28	43	N	47	N	67	123	2	53	N	96-	1	N	106	N	N	31	2	78	N	1	1	N	1	9	1	N	6	1	1	1	16	N	1	1	N	1	1	1	1	0?	1	58-	164-	1	1-	0?	1	56	76-	88	12	2	57	N	N	44	94	33	N	44	9	56	1	8	5	N	40	0?	41	145	78	204	80	62-	3	75	87	76	0?	87-	61	40	N	N	22-	N	35	18	74	102	18	2	3	7	55	N	54	22	18	N	21	28	0?	70	17	64	49	N	18	60	N	1	0?	0?	1	16	N	3	5-	5	N	63	7	1	21	N	1	16	N	5	N	158-	N	91-	1	N	2	12	11-	259	70-	20	N	86	89-	124-	1	55	79	19	84-	74	N	12	18	19	N	19	21	94	23	N	90	68-	19	19	17	5-	63	59	49	50	55	217	N	9	N	78	12-	89	87	N	79	87	74	226	61	24	24	78	19	N	23	80	85-	85	3	N	N	76	93	81-	38	75-	61	106	90	105	16	26	0?	68	53	65	90	0?	23-	70	93-	76-	2	72	62	92-	19	22	N	131-	203-	18	2	91-	N	65-	72-	66	68-	59	76-	86	N	183	N	N	61	56-	2	5	N	N	23	5	1	92-	42	15	N	24	73	7	N	117	40	86-	54	78	54	N	80	22	0?	N	N	87	N	80	2	1	95	N	73	1	3	78	74	87	55	94	87	97-	55-	97-	4	81	94	N	N	100	N	N	68	10	59-	N	N	41-	N	2	6	77	87-	74	10	2	62-	1	N	N	1-	50	87	85	74	124	65	3-	N	72	3	101-	209	19	113	0?	20	24-	76	0?	N	80-	1	69	51	N	N	68	2	3	25	71	100-	70	0	0
GCA_001420335.1_ASM142033v1_genomic.fna	3	N	8	8	8	2	1	N	17	8	2	9	1	7	8	7	8	8	8	N	7	6	217+	8	2	8	8	2	7	8	3	7	8	8	8	7	9	9	191	9	8	9	N	9	9	8	9	8	4	79	9	21	8	9	9	9	9	9	3	N	8	158	8	19	8	9	9	9	9	8	8	8	8	8	8	8	N	8	8	8	8	8	8	8	8	8	N	N	N	8	8	8	7	8	7	N	8	8	8	7	8	7	7	4	61	8	8	8	7	8	8	54	3	N	1	N	1	10	2	27	1	10	10	11	10	11	68	3	11	11	3	9	11	N	11	11	8	11	11	12	11	8	1	10	11	11	10	N	11	22	N	78	N	10-	16	23	1	3	11	N	N	10	11	3	10	11	11	N	N	10	11	8	10	11	11	11	2	107	9	10	10	11	3	N	9	10	10	30	10	38	10	9	10	10	10	N	3	2	9	10	10	27	10	10	1	1	1	6	5	3	166	11	1	1	1	1	9	9	10	10	8	N	N	10	79	9	10	9	11	N	9	9	N	10	10	11	11	194	3	N	11	11	10	11	78	11	10	113	8	9	11	3	10	8	10	10	11	N	10	5	10	9	N	10	11	35	N	41	1	27	24	28	25	24	51	34	10	1	1	1	11	1	1	N	1	1	28	11	N	9	9	9	N	1	10	10	9	10	6	N	9	9	N	10	9	10	10	11	N	10	N	10	1	10	10	6	10	3	N	1	10	10	10	10	11	10	11	10-	11	10	8	10	1	28	1	1	10	10	9	11	6	8	7	4	10	1	1	10	1	9	3	5	9	10	10	8	10	10	10	10	8	1	N	212-	N	7	10	10	10	10	N	10	10	10	10	10	N	9	10	25	10	10	10	10	10	10	10	10	3	8	10	9	10	10	9	11	9	4	6	10	10	10	10	10	87	N	10	10	36	9	9	4	9	10	10	10	11	11	11	10	8	N	10	8	N	10	4	10	8	10	96	10	8	9	44	9	9	10	10	8	N	7	3	2	N	N	1	9	9	10	1	1	10	6	N	N	10	N	10	10	3	10	N	10	8	10	1	10	7	11	11	10	4	1	10	10	10	62	10	N	9	3	10	12	N	10	11	11	10	10	8	11	11	12	11	11	11	N	9	11	N	10	10	45	10	83	10	10	N	1	41	N	10	10	4	10	N	1	11	9	9	10	2	4	4	8	10	23	11	8	9	10	1	1	10	6	10	1	1	3	42	1	10	9	9	10	9	10	N	10	11	10	10	9	10	10	1	10	3	10	10	10	10	N	11	10	4	3	6	10	4	3	1	8	4	1	8	9	10	11	10	10	9	8	1	1	9	7	10	N	28	10	11	10	10	6	3	10	10	11	11	83	2	N	10	10	7	10	11	1	1	N	11	11	9	11	N	67	11	3	2	3	11	11	3	3	N	10	11	12	10	44	56	9	1	5	11	10	11	12	11	54	12	11	61	12	2	11	N	11	52	1	1	1	1	1	N	N	1	1	N	1	1	102	N	11	40	1	11	11	2	1	67	3	4	11	11	9	11	3	12	11	12	11	9	54	N	10	11	N	11	12	10	11	12	135	N	N	12	8	76	10	10	N	10	10	10	9	10	10	9	9	1	3	4	9	N	6	6	6	11	9	9	9	10	7	10	5	N	10	10	12	34	N	10	N	9	11	11	11	11	11	10	10	10	6	N	8	10	N	6	9	10	10	10	9	9	5	10	11	2	9	10	10	N	10	N	10	N	10	10	11	2	10	9	9	1	9	1	10	30	6	6	10	9	10	10	3	10	N	2	9	N	9	9	10	10	10	10	10	10	2	8	7	7	1	10	10	10	10	10	10	10	8	N	9	10	9	8	8	8	10	2	7	1	7	10	10	1	7	10	10	10	199	10	10	8	10	N	11	10	10	4	10	2	8	N	11	9	10	6	9	9	10	6	9	N	10	81	10	11	10	N	10	10	10	10	N	3	11	11	11	10	10	10	61	10	10	10	10	6	10	11	N	10	10	10	2	N	N	9	10	10	10	10	N	N	10	10	37	6	3	N	7	N	11	10	9	1	10	10	9	10	11	8	36+	9	11	10	10	9	11	N	10	9	9	10	38	10	9	10	N	28	10	63	N	11	11	N	1	11	10	6	9	9	10	10	10	9	10	10	9	10	10	10	10	1	5	10	10	10	N	11	9	10	11	10	9	10	10	10	11	10	4	9-	N	4	56	9	1	9	9	7	10	9	9	41	10	10	8	10	7	2	9	10	10	33	N	7	10	N	9	9	6	1	10	10	10	N	1	N	10	101	10	11	12	6	10	8	11	1	8	2	N	10	6	11	9	7	11	N	11	11	10	10	11	N	7	10	7	11	3	3	9	10	11	12	11	N	11	10	10	11	3	11	11	N	11	N	5	5	10	11	10	N	5	11	58	1	11	10	11	11	7	11	2	8	11	4	2	10	11	2	10	9	1	11	8	11-	92	40	9	8	11	11	11	11	11	2	28	4	N	10	9	11	10	11	11	27	12	3	10	10	10	10	3	3	10	6	9	7	9	11	3	7	10	10	9	9	6	9	9	10	11	11	11	10	10	9	11	11	11	11	11	11	93	11	11	11	11	N	N	10	71	11	11	9	10	11	N	N	78	10	2	2	11	10	11	10	10	N	5	9	31	10	10	4	10	10	10	9	11	9	11	10	10	10	10	9	10	10	10	10	10	10	6	9	10	9	8	59	9	10	10	10	10	11	9	78	10	10	10	10	10	N	10	83	10	36	N	11	11	9	44	10	6	N	10	10	11	10	10	10	10	10	10	N	10	10	6	11	10	9	9	9	9	10	69	10	10	10	10	9	10	1	10	10	10	10	8	11	2	10	10	11	10	9	10	10	10	N	10	10	2	10	5	10	N	2	2	10	5	9	3	2	4	N	10	10	1	10	10	10	10	N	1	9	11	11	8	6	215	2	10	10	N	11	42	7	N	N	6	8	60	N	10	9	9	3	10	10	10	10	1	9	10	10	10	9	9	4	10	10	6	1	10	10	7	10	7	11	2	12	N	10	10	9	11	11	N	1	4	N	9	8	1	10	8	10	10	10	10	11	11	10	10	8	10	10	10	10	11	9	N	10	N	28	7	11	9	10	N	7	3	8	2	9	10	10+	8	8	2	1	10	9	N	9	10	10	10	8	9	10	9	84	10	10	10	10	10	11	10	10	10	7	10	9	7	32	4	2	9	5	10	N	10	1	10	7	10	10	8	10	11	119	10	9	10	10	9	10	9	11	11	10	80	9	10	10	5	10	10	10	12	11	10	9	11	19	8	9	1	N	1	1	1	9	9	10	10	10	N	10	N	7	71	10	1	10	10	10	7	10	10	3	10	39	10	10	10	10	10	9	4	8	4	11	43	6	48	9	98	10	10	28	10	10	1	5	11	11	10	33	10	9	9	9	8	8	9	1	1	10	N	5	8	8	1	1	1	1	1	1	1	1	10	1	10	1	1	1	1	1	1	6	10	10	10	2	11	10	10	9	N	93	10	10	10	10	10	9	8	10	2	1	9	10	10	N	10	7	1	10	11	9	9	10	N	3	10	N	10	10	10	10	N	6	11	9	5	9	10	10	11	32	11	N	10	N	10	2	9	N	10	10	10	9	9	10	10	28	10	28	N	31	34	10	10	10	10	10	11	11	10	N	4	9	91	2	11	9	8	9	9	8	8	9	10	8	10	6	9	8	9	9	11	32	11	11	38	11	48	44	10	9	9	N	6	N	9	10	10	10	9	10	8	10	N	10	9	9	9	N	9	N	N	N	10	8	11	10	N	25	10	9	10	10	10	9	11	20	10	10	10	N	10	9	N	1	8	8	3	9	10	10	10	1	10	9	33	10	10	10	10	11	10	10	3	10	9	40	10	10	10	7	5	5	9	5	4	5	9	9	8	4	10	N	10	25	9	1	11	9	11	9	1	10	10	9	1	9	N	8	9	9	7	N	N	9	10	10	79	10	10	9	10	N	10	11	57	25	10	10	10	10	2	10	10	N	40	10	8	10	10	N	10	38	126	7	8	11	2	10	11	9	10	58	10	12	N	1	10	10	10	0?	10	1	35	24	19	7	10	9	1	5	1	10	11	8	9	10	7	10	9-	10	9	9	10	N	9	9	9	5	N	1	3	7	7	10	N	1	N	1	10	9	10	10	9	1	N	9	8	2	1	1	3	10	11	10	N	N	9	4	8	9	9	12	0?	0?	0?	0?	N	9	10	9	10	5	9	8	N	10	10	26	10	11	28	10	N	1	11	N	2	11	2	N	11	11	64	11	N	10	64	3	N	9	N	5	9	9	6	N	10	1	10	10	N	10	5	3	4	9	10	N	10	6	5	10	9	8	24	10	10	N	11	1	1	1	10	10	N	10	9	4	7	9	2	7	8	10	9	N	9	10	10	10	11	N	N	10	N	10	11	10	9	9	9	6	9	71	8	1	N	9	83	9	N	10	9	N	9	N	0?	10	10	8	9	55	N	9	9	9	9	1	10	10	10	10	9	10	8	5	10	1	3	10	6	8	N	10	10	10	10	10	8	10	9	10	11	10	1	3	9	6	5	9	46	8	9	9	8	10	10	11	10	N	9	10	9	9	N	9	10	8	9	4	8	10	9	1	8	10	9	8	10	4	10	11	1	1	4	1	1	1	N	6	1	1	1	4	N	2	1	1	1	1	1	1	N	1	1	3	1	N	1	1	9	11	10	9	10	10	11	10	3	10	9	11	7	6	55	7	7	5	9	32	9	11	8	9	9	9	9	6	9	9	9	8	10	10	22	10	9	10	N	10	9	10	9	9	7	2	9	3	9	N	10	10	10	10	10	10	4	9	9	4	4	N	10	10	3	N	6	2	30	N	22	24	22	24	38	27	1	N	16	8	17	82	5	9	N	11	10	5	9	4	11	10	N	12	4	12	12	12	12	1	9	10	7	10	42	29	1	39	32	N	38	38	93	59	11	54	N	38	17	3	42	36	34	1	41	11	N	10	9	12	11	10	11	86	11+	11	11	36	N	11	11	11-	11	10	N	10	10	10	N	10	9	N	10	11	9	10	10	10	11	11	10	8	10	11	37	2	10	11	10	10	10	11	N	3	10	11	11	10	11	10	9	10	9	7	11	11	11	11	9	6	5	11	N	10	10	6	N	11	10	10	9	11	12	11	9	N	11	9	10	12	31	10	11	N	116	10	11	11	11	11	12	11	83	11	11	11	11	N	10	6	3	11	11	10	3	5	10	41	11	10	11	11	11	11	10	9	10	11	11	N	11	10	9	11	11	10	11-	N	9	3	5	9	76	10	N	9	2	10	5	11	N	1	N	11	11	11	11	10	39	10	10	1	N	66	14	8	16	15	N	8	8	8	8	1	68	7	N	8	8	5	8	8	8	N	8	0	0
GCA_001420385.1_ASM142038v1_genomic.fna	3	N	8	8	8	2	1	1	17	8	2	9	1	7	8	7	8	8	8	8	7	6	217+	8	2	8	8	2	7	8	3	7	8	8	8	7	9	9	N	9	8	9	N	9	9	8	9	8	4	9	9	21	8	9	9	N	9	N	3	60	52	211	56	56	8	9	9	9	9	8	8	8	8	N	8	8	N	8	8	8	8	8	8	8	8	8	8	8	8	8	8	8	7	8	7	8	8	8	8	N	8	7	7	4	61	8	8	8	7	8	8	54	3	N	1	1	1	10	2	27	1	10	10	11	10	11	68	3	11	11	3	9	11	N	11	N	8	11	11	12	11	8	1	10	11	11	N	N	11	22	28	78	24	10-	16	23	1	3	11	10	11	10	11	3	10	11	11	N	N	10	11	8	10	11	11	11	2	10	9	N	10	11	3	10	9	10	10	30	10	38	10	9	10	10	10	11	3	2	9	10	10	27	10	10	1	1	1	6	5	3	166	N	1	1	1	1	9	9	10	10	8	2	N	10	79	9	10	9	11	N	9	9	10	10	10	11	11	N	3	11	11	11	10	11	78	11	10	113	8	9	11	3	N	8	N	10	11	54	10	5	10	9	10	10	11	35	30	N	1	27	24	75	25-	24	171	34	N	1	1	1	11	1	1	N	1	1	28	11	1	9	9	9	5	1	10	10	9	10	6	9	9	9	10	10	9	10	10	11	N	10	10	10	1	10	10	N	10	3	N	1	10	N	10	10	11	10	11	10-	11	10	8	10	1	28	1	1	10	10	9	11	6	8	7	4	N	1	1	10	1	9	3	5	9	10	10	8	10	10	10	10	8	1	6	212-	N	7	10	10	10	10	10	10	10	10	10	10	10	9	10	25	10	10	10	10	10	N	10	10	3	8	10	9	10	10	9	11	9	4	6	10	10	10	10	10	87	N	10	10	36	9	9	4	9	10	10	10	N	11	11	10	8	N	10	8	N	10	4	10	8	10	96	10	8	9	44	9	9	10	10	8	9	7	3	N	10	10	1	9	9	10	N	N	10	6	10	2	10	1	N	10	3	10	10	10	8	10	1	10	7	11	11	10	4	1	10	10	10	62	10	11	9	3	10	12	26	10	11	11	10	10	8	11	11	12	11	N	11	11	9	11	N	10	10	45	10	83	10	10	10	1	41	1	10	10	4	10	1	1	11	9	9	N	2	4	4	8	10	23	11	8	9	10	1	1	10	6	10	1	1	3	42	1	10	9	9	10	9	10	10	10	11	10	10	9	10	10	1	10	3	10	10	10	10	10	11	10	4	3	6	10	4	3	1	8	4	1	8	9	10	72	10	N	9	N	1	1	9	7	10	84	28	10	11	10	N	6	3	10	10	11	11	83	2	10	10	10	7	10	11	1	1	1	11	11	9	N	11	67	11	3	2	3	11	11	N	3	11	10	11	12	10	44	56	9	1	5	11	10	11	12	11	54	12	11	61	12	2	11	11	11	52	1	1	1	1	1	12	12	N	1	1	1	1	73	12	11	40	1	11	11	2	1	N	3	4	11	11	9	11	3	12	11	12	N	9	54	10	10	11	N	11	12	10	11	12	135	12	10	12	8	76	10	10	10	10	10	10	9	10	10-	9	9	1	3	4	9	6	6	6	6	11	9	9	9	10	7	10	5	N	10	10	12	34	10	10	N	9	11	11	11	11	11	10	10	10	6	5	8	10	N	6	9	10	10	10	9	9	5	10	11	2	9	10	10	10	10	N	10	10	10	10	11	2	N	9	9	1	9	1	10	N	6	6	10	9	10	10	3	10	N	2	9	N	9	9	10	10	10	10	10	10	2	8	7	7	1	10	10	10	10	10	10	10	8	11	9	10	9	8	8	8	10	2	7	1	7	10	10	1	7	N	10	10	10	10	10	8	10	10	11	10	10	4	10	2	8	11	11	9	10	89+	9	9	10	6	9	N	10	10	10	11	10	10-	10	10	10	10	10	3	11	11	11	10	10	10	11	10	10	10	10	6	10	11	N	10	10	10	2	10	10	9	10	10	10	10	10	10	10	10	37	6	3	5	7	10	11	N	9	1	10	10	9	10	N	8	36+	9	11	10	10	9	11	N	10	9	9	10	38	10	N	N	11	28	80	63	10	11	11	N	1	11	10	6	9	9	10	10	10	9	10	10	9	10	10	10	10	1	5	N	10	10	N	11	9	10	11	10	9	10	10	10	11	10	4	9	7	4	56	9	1	9	9	7	10	9	9	93	10	10	8	10	7	2	9	10	10	33	9	7	10	N	9	9	6	1	10	10	10	9	1	11	10	52	10	N	N	6	10	8	11	1	8	2	11	10	6	11	9	7	11	N	11	11	10	10	11	N	7	10	7	11	3	3	9	N	11	12	11	11	11	10	10	11	3	11	11	11	11	11	5	5	10	11	10	11	5	11	58	1	11	10	11	11	7	11	2	8	11	4	2	10	11	2	10	9	1	11-	8	11	11	40	9	8	11	11	11	N	11	2	28	4	N	10	9	11	10	11	11	27	12	3	N	10	10	10	3	3	10	6	9	7	9	11	3	7	10	10	9	9	6	9	9	10	11	11	11	10	10	9	11	11	11	11	11	11	11	11	11	N	11	11	N	10	71	11	N	9	10	11	N	N	78	10	2	2	N	10	11	10	10	10	5	9	31	10	10	4	10	10	10	9	11	9	11	10	10	10	10	9	10	10	10	10	10	10	6	9	10	9	8	N	9	10	10	10	10	11	9	9	10	10	10	304-	10	10	10	83	10	36	10	11	N	9	44	10	6	10	10	10	N	10	10	10	10	10	10	N	10	10	6	11	10	9	9	70	9	10	10	N	10	10	10	9	10	N	10	10	10	10	8	11	2	10	10	11	10	9	10	10	10	10	10	10	2	N	5	10	10	2	2	10	5	9	3	2	4	N	10	10	1	10	10	10	83	10	1	9	11	11	8	6	47	2	10	10	10	11	N	7	28	N	6	8	60	9	10	9	9	3	10	N	10	10	1	9	10	10	10	N	9	4	10	10	6	1	10	10	7	10	7	11	2	12	77	10	10	9	11	103	10	1	4	10	9	8	1	10	8	10	10	10	10	N	11	10	10	8	10	10	10	10	125	9	10	10	10	28	7	11	9	10	N	7	3	8	2	9	126	10+	8	8	2	1	10	9	N	9	10	10	10	8	9	10	9	N	10	10	10	10	10	11	10	10	10	7	10	9	7	32	4	2	9	5	10	10	10	1	10	7	10	10	8	10	11	11	10	N	10	10	9	10	9	11	11	10	N	9	10	10	5	10	10	N	12	11	10	9	11	19	8	9	N	N	1	1	1	9	9	10	10	10	10	10	10	7	11	10	1	10	10	10	7	10	10	3	10	N	10	10	10	10	10	9	4	8	4	88	43	6	48	N	98	N	10	28	10	10	1	5	11	11	10	33	10	9	9	N	8	8	9	1	1	10	2	5	8	8	1	1	1	N	1	1	1	1	10	1	10	1	1	1	1	104	1	6	10	N	10	2	11	10	10	9	N	93	10	10	10	10	N	9	8	10	2	1	9	10	10	N	10	7	1	10	11	9	9	10	11	3	10	N	10	10	10	10	10	6	11	9	5	9	10	10	11	32	11	N	10	101	10	2	9	7	10	10	10	9	9	10	N	28	10	28	36	31	34	10	10	10	10	10	11	11	10	N	N	9	91	2	11	9	8	9	9	8	8	9	10	8	10	6	9	8	9	9	11	N	11	11	38	11	48	44	10	9	9	N	6	158	9	10	10	10	9	10	8	10	10	10	9	9	N	10	9	N	N	N	10	8	11	10	5	25	10	9	10	10	10	9	11	20	10	10	10	9	10	9	N	1	8	8	3	9	10	10	10	1	10	9	33	10	10	N	10	11	10	10	3	10	9	40	10	10	10	7	5	5	9	5	4	5	9	9	8	4	10	56	10	68	9	1	N	9	11	9	1	10	10	9	1	9	N	8	9	9	7	51	10	9	10	10	79	10	10	N	10	10	10	11	57	25	10	10	10	10	2	10	10	N	40	10	8	10	10	N	10	38	126	N	8	N	2	10	11	9	10	58	10	12	N	1	N	10	10	0?	10	1	35	24	19	7	10	9	1	5	1	10	11	8	9	10	7	N	9-	10	9	9	10	8	9	9	111	N	10	1	3	7	7	10	N	1	N	1	10	9	10	10	9	1	9	9	8	2	1	1	3	10	11	10	N	10	9	4	8	9	9	12	9	9	10	9	10	9	10	N	10	5	9	8	9	10	10	26	N	11	28	10	11	1	11	2	2	11	2	N	11	11	11	11	N	10	64	3	9	9	N	5	9	9	6	N	10	1	88	10	10	10-	5	3	4	9	10	124	10	6	5	10	9	8	24	10	10	9	11	1	1	1	10	10	N	10	9	4	7	9	2	7	8	10	9	4	9	10	10	50	11	N	10	10	10	10	11	10	9	9	9	6	9	71	8	1	10	9	10	9	11	10	9	9	9	41	0?	10	N	8	9	55	36	9	9-	70	9	1	10	10	N	10	9	10	8	5	10	1	3	10	6	8	N	10	10	10	N	10	8	10	9	10	N	10	1	3	9	6	5	9	46	8	9	9	8	10	10	11	10	24	9	10	9	9	1	9	10	8	9	4	8	10	9	1	8	10	9	8	10	4	10	122	1	1	4	1	1	1	9	6	1	1	1	4	3	2	1	1	1	1	1	1	N	1	1	N	1	2	1	1	9	11	10	9	10	10	11	10	3	10	9	11	7	6	55	7	7	5	N	32	9	11	8	9	9	9	9	6	9	9	9	8	10	10	22	10	9	10	N	10	9	10	9	9	N	2	9	3	9	9	10	10	10	10	10	10	4	N	9	4	4	4	10	10	3	33	6	2	30	N	22	24	22	24	38	27	1	42	16	8	17	82	5	9	95	11	10	5	9	4	11	10	12	12	4	12	12	12	12	1	9	10	7	10	N	29	1	39	32	N	38	38	93	59-	11	54	45	38	17	3	42	36	34	1	41	11	11	10	9	12	11	10	11	86	11+	11	11	36	11	11	11	11	11	10	10	10	10	10	11	10	9	10	10	83	81	38	99-	78	133	61	11	9	53	N	11	9	11	12	11	11	11	12	N	7	11	12	12	11	12	11	45	203-	9	7	11	11	11	11	9	6	5	11	4	10	N	6	N	11	10	10	9	11	12	11	9	1	N	9	10	N	31	N	11	N	11	N	11	11	11	11	12	11	83	11	11	11	11	N	10	6	3	11	11	10	3	5	10	41	11	10	11	104	11	11	10	9	10	11	11	11	11	10	9	11	11	10	11	N	9	3	5	9	76	10	11	9	2	10	5	11	N	1	12	11	11	11	11	10	39	10	10	1	11	66	14	N	16	15	N	8	8	8	8	1	68	7	N	8	8	5	8	8	8	8	8	0	0
[truncated: 94,324,074 more chars]
