# Supplementary material for: International Clones of High Risk of Acinetobacter Baumannii—Definitions, History, Properties and Perspectives
Source: Microorganisms. 2023 Aug 19;11(8):2115. doi: 10.3390/microorganisms11082115 (PMC10459012; doi:10.3390/microorganisms11082115)
Supplement: Supplementary file 1 [file microorganisms-11-02115-s001.zip › tableS3.xlsx]

## Sheet: TableS3
Table S3: Summary of antimicrobial resistance genes revealed in A. baumannii isolates from Genbank using ResFinder 4.3.0
Assembly name	NUM_FOUND	ARR-2_1	ARR-3_4	OqxA_1	OqxB_1	aac(2')-Ia_1	aac(3)-IIa_1	aac(3)-IIa_2	aac(3)-IIa_6	aac(3)-IIb_1	aac(3)-IId_1	aac(3)-Ia_1	aac(3)-Id_1	aac(6')-IIc_1	aac(6')-Iaf_1	aac(6')-Ian_1	aac(6')-Ib-cr_1	aac(6')-Ib_1	aac(6')-Ij_1	aac(6')-Il_1	aac(6')-Ir_1	aac(6')-Iz_1	aadA11_1	aadA16_1	aadA17_1	aadA1_2	aadA1_3	aadA1_4	aadA2_1	aadA2_2	aadA5_1	ant(2'')-Ia_1	ant(2'')-Ia_13	ant(2'')-Ia_2	ant(2'')-Ia_20	ant(2'')-Ia_6	ant(3'')-Ia_1	ant(6)-Ia_1	ant(9)-Ia_1	aph(3'')-Ib_2	aph(3'')-Ib_5	aph(3')-III_1	aph(3')-IIa_2	aph(3')-IIb_2	aph(3')-IIc_1	aph(3')-Ia_1	aph(3')-Ia_10	aph(3')-Ia_3	aph(3')-Ia_7
GCA_000015425.1_ASM1542v1	3	.	.	.	.	.	.	.	.	.	.	.	.	.	.	.	.	.	.	.	.	.	.	.	.	.	.	.	.	.	.	.	.	.	.	.	.	.	.	.	.	.	.	.	.	.	.	.	.
GCA_000069205.1_ASM6920v1	1	.	.	.	.	.	.	.	.	.	.	.	.	.	.	.	.	.	.	.	.	.	.	.	.	.	.	.	.	.	.	.	.	.	.	.	.	.	.	.	.	.	.	.	.	.	.	.	.
GCA_000184475.2_ASM18447v2	11	.	.	.	.	.	.	.	.	.	.	100.00	.	.	.	.	.	.	.	.	.	.	.	.	.	.	.	.	.	.	.	.	.	.	.	.	82.51	.	.	.	.	.	.	.	.	.	.	.	.
GCA_000184495.2_ASM18449v2	3	.	.	.	.	.	.	.	.	.	.	.	.	.	.	.	.	.	.	.	.	.	.	.	.	.	.	.	.	.	.	.	.	.	.	.	.	.	.	.	.	.	.	.	.	.	.	.	.
GCA_000184515.2_ASM18451v2	14	.	.	.	.	.	.	.	.	.	.	.	.	.	.	.	.	.	.	.	.	.	.	.	.	.	.	.	97.92	.	.	100.00	.	.	.	.	.	.	.	.	.	.	.	.	.	.	.	.	.
GCA_000186565.1_ASM18656v1	3	.	.	.	.	.	.	.	.	.	.	.	.	.	.	.	.	.	.	.	.	.	.	.	.	.	.	.	.	.	.	.	.	.	.	.	.	.	.	.	.	.	.	.	.	.	.	.	.
GCA_000186645.2_ASM18664v2	13	.	.	.	.	.	.	.	.	.	.	100.00	.	.	.	.	.	.	.	.	.	.	.	.	.	.	.	.	.	.	.	.	.	.	.	.	82.51	.	.	99.88	.	.	.	.	.	.	.	.	.
GCA_000186665.4_ASM18666v4	3	.	.	.	.	.	.	.	.	.	.	.	.	.	.	.	.	.	.	.	.	.	.	.	.	.	.	.	.	.	.	.	.	.	.	.	.	.	.	.	.	.	.	.	.	.	.	.	.
GCA_000187205.4_ASM18720v4	16	.	.	.	.	.	.	.	.	.	.	100.00	.	.	.	.	.	.	.	.	.	.	.	.	.	.	.	.	.	.	.	.	.	.	.	.	82.51;82.51	.	.	99.75	.	.	.	.	.	.	.	.	.
GCA_000189655.2_ASM18965v2	15	.	.	.	.	.	.	.	.	.	.	.	.	.	.	.	.	.	.	.	.	.	.	.	.	.	.	.	.	.	.	.	.	.	.	.	82.51	.	.	99.88	.	.	.	.	.	.	.	.	100.00
GCA_000189675.2_ASM18967v2	8	.	.	.	.	.	.	.	.	.	.	.	.	.	.	.	.	.	.	.	.	.	.	.	.	.	.	.	.	.	.	.	.	.	.	.	.	.	.	.	.	.	.	.	.	.	.	.	.
GCA_000189695.2_ASM18969v2	8	.	.	.	.	.	.	.	.	.	.	.	.	.	.	.	.	.	.	.	.	.	.	.	.	.	.	.	.	.	.	100.00	.	.	.	.	.	.	.	.	.	.	.	.	.	.	.	.	100.00
GCA_000189715.2_ASM18971v2	7	.	.	.	.	.	.	.	.	.	.	.	.	.	.	.	.	.	.	.	.	.	.	.	.	.	.	.	.	.	.	.	.	.	.	.	82.30	.	.	.	.	.	.	.	.	.	.	.	.
GCA_000189735.2_ASM18973v2	16	.	.	.	.	.	.	.	.	.	.	100.00	.	.	.	.	.	96.86	.	.	.	.	.	.	.	.	.	.	.	.	.	.	.	.	.	.	82.51;82.51	.	.	99.88	.	.	.	.	.	.	.	.	100.00;100.00
GCA_000214965.2_gacin09v1.0	11	.	.	.	.	.	.	.	.	.	.	.	.	.	.	.	.	.	.	.	.	.	.	.	.	.	.	.	.	.	.	.	100.00	.	.	.	.	.	.	99.75	.	.	.	.	.	.	.	.	100.00
GCA_000214985.2_gacin10v1.0	8	.	.	.	.	.	.	.	.	.	.	.	.	.	.	.	.	.	.	.	.	.	.	.	.	.	.	.	.	.	.	.	100.00	.	.	.	.	.	.	.	.	.	.	.	.	.	.	.	.
GCA_000215005.2_AcbauOIFC032v1.0	3	.	.	.	.	.	.	.	.	.	.	.	.	.	.	.	.	.	.	.	.	.	.	.	.	.	.	.	.	.	.	.	.	.	.	.	.	.	.	.	.	.	.	.	.	.	.	.	.
GCA_000222225.2_ASM22222v2	6	.	.	.	.	.	.	.	.	.	.	97.38	.	.	.	.	.	.	.	.	.	.	.	.	.	.	.	.	.	.	.	.	.	.	.	.	.	.	.	.	.	.	.	.	.	.	.	.	.
GCA_000222245.2_ASM22224v2	10	.	.	.	.	.	.	.	.	.	.	89.51	.	.	100.00	.	.	.	.	.	.	.	.	.	.	.	.	.	.	.	.	.	.	.	.	.	.	.	.	99.88	.	.	.	.	.	.	.	.	.
GCA_000222265.2_ASM22226v2	11	.	.	.	.	.	.	.	.	.	.	97.38	.	.	100.00	.	.	.	.	.	.	.	.	.	.	.	.	.	.	.	.	.	.	.	.	.	.	.	.	99.88	.	.	.	.	.	.	.	.	.
GCA_000222285.2_ASM22228v2	3	.	.	.	.	.	.	.	.	.	.	.	.	.	.	.	.	.	.	.	.	.	.	.	.	.	.	.	.	.	.	.	.	.	.	.	.	.	.	.	.	.	.	.	.	.	.	.	.
GCA_000241665.2_ASM24166v2	8	.	.	.	.	.	.	.	.	.	.	.	.	.	.	.	.	.	.	.	.	.	.	.	.	.	.	.	.	.	.	.	100.00	.	.	.	.	.	.	.	.	.	.	.	.	.	.	.	.
GCA_000241685.2_ASM24168v2	15	.	.	.	.	.	.	.	.	.	.	.	.	.	.	.	.	95.71	.	.	.	.	.	.	.	.	.	.	97.92	.	.	100.00	.	.	.	.	.	.	.	.	100.00	.	.	.	.	.	.	.	.
GCA_000241705.2_ASM24170v2	9	.	.	.	.	.	100.00	.	.	.	.	.	.	.	.	100.00	.	.	.	.	.	.	.	.	.	.	.	.	.	.	.	.	.	.	.	.	.	.	.	99.88	.	.	.	.	.	.	.	.	.
GCA_000241725.2_ASM24172v2	10	.	.	.	.	.	.	.	.	.	.	100.00	.	.	.	.	.	.	.	.	.	.	.	.	.	.	.	.	.	.	.	.	.	.	.	.	.	.	.	99.88;99.88	.	.	.	.	.	.	.	.	.
GCA_000248195.2_ASM24819v2	4	.	.	.	.	.	.	.	.	.	.	.	.	.	.	.	.	.	100.00	.	.	.	.	.	.	.	.	.	.	.	.	.	.	.	.	.	.	.	.	.	.	.	.	.	.	.	.	.	.
GCA_000248255.2_ASM24825v2	12	.	.	.	.	.	.	.	.	.	.	.	.	.	.	.	.	.	.	.	.	.	.	.	.	.	.	.	.	.	.	.	.	.	.	.	82.51	.	.	99.88	.	.	.	.	.	.	.	.	100.00
GCA_000248275.2_ASM24827v2	15	.	.	.	.	.	.	.	.	.	.	.	.	.	.	.	.	.	.	.	.	.	.	.	.	.	.	.	.	.	.	.	.	.	.	.	82.51	.	.	99.88	.	.	.	.	.	.	.	.	100.00
GCA_000282795.3_ASM28279v3	12	.	.	.	.	.	.	.	.	.	.	.	.	.	.	.	.	.	.	.	.	.	.	.	.	.	.	.	.	.	.	.	.	.	.	.	.	.	.	99.88	.	.	.	.	.	.	.	.	100.00
GCA_000307975.2_ASM30797v2	12	.	.	.	.	.	.	.	.	.	.	.	.	.	.	.	.	.	.	.	.	.	.	.	.	.	.	.	.	.	.	.	.	.	.	.	.	.	.	99.88	.	.	.	.	.	.	.	.	100.00
GCA_000353935.1_ABNIH5_1	6	.	.	.	.	.	.	.	.	.	.	100.00	.	.	.	.	.	.	.	.	.	.	.	.	.	.	.	.	.	.	.	.	.	.	.	.	.	.	.	.	.	.	.	.	.	.	.	.	.
GCA_000353955.1_ABNIH6_1	14	.	.	.	.	.	.	.	.	.	.	100.00	.	.	.	.	.	.	.	.	.	.	.	.	.	.	.	100.00	.	.	.	.	.	.	.	.	.	.	.	.	.	.	.	.	.	.	.	.	100.00
GCA_000353995.1_ABNIH10_1	14	.	.	.	.	.	.	.	.	.	.	97.94	.	.	.	.	.	.	.	.	.	.	.	.	.	.	84.60	.	.	.	.	.	.	.	.	.	.	.	.	.	.	.	.	.	.	.	.	.	100.00
GCA_000464705.1_ASM46470v1	2	.	.	.	.	.	.	.	.	.	.	.	.	.	.	.	.	.	.	.	.	.	.	.	.	.	.	.	.	.	.	.	.	.	.	.	.	.	.	.	.	.	.	.	.	.	.	.	.
GCA_000505685.2_ASM50568v2	7	.	.	.	.	.	.	.	.	.	.	.	.	.	.	.	.	.	.	.	.	.	.	.	.	.	.	.	.	.	.	.	.	.	.	.	.	.	.	.	.	.	.	.	.	.	.	.	.
GCA_000509305.1_ASM50930v1	10	.	.	.	.	.	.	.	.	.	.	.	.	.	.	.	.	.	.	.	.	.	.	.	.	.	.	.	.	.	.	.	.	.	.	.	82.51	.	.	99.88	.	.	.	.	.	.	.	.	.
GCA_000509325.1_ASM50932v1	12	.	.	.	.	.	.	.	.	.	.	.	.	.	.	.	.	.	.	.	.	.	.	.	.	.	.	.	.	.	.	.	.	.	.	.	82.51	.	.	99.88	.	.	.	.	.	.	.	.	.
GCA_000509345.1_ASM50934v1	13	.	.	.	.	.	.	.	.	.	.	100.00	.	.	.	.	.	.	.	.	.	.	.	.	.	.	.	.	.	.	.	.	.	.	.	.	82.51;82.51	.	.	99.75	.	.	.	.	.	.	.	.	.
GCA_000515795.2_gabuh19608_v01	16	.	.	.	.	.	100.00	.	.	.	.	.	.	.	.	100.00	.	.	.	.	.	.	.	.	.	.	.	.	.	.	.	100.00	.	.	.	.	.	.	.	99.88	.	.	.	.	.	.	.	.	.
GCA_000516095.2_gabuh99pb_v01	18	.	.	.	.	.	.	.	.	.	.	.	.	.	.	.	.	.	.	.	.	.	.	.	.	.	.	.	.	.	.	.	.	.	.	.	82.51	.	.	99.88	.	.	.	.	.	.	.	.	100.00;100.00
GCA_000522525.1_AB-MDR-MMC4	11	.	.	.	.	.	.	.	.	.	.	.	.	.	.	.	.	.	.	.	.	.	.	.	.	.	.	.	.	.	.	100.00	.	.	.	.	.	.	.	.	.	.	.	.	.	.	.	.	.
GCA_000580355.2_ASM58035v2	5	.	.	.	.	.	.	100.00	.	.	.	.	.	.	.	.	.	.	.	.	.	.	.	.	.	.	.	.	.	.	.	.	.	.	.	.	.	.	.	.	.	.	.	.	.	.	.	.	.
GCA_000580435.2_ASM58043v2	6	.	.	.	.	.	.	.	.	.	.	.	.	.	.	.	.	.	.	.	.	.	.	.	.	.	.	.	.	.	.	.	.	.	.	.	.	.	.	.	.	.	.	.	.	.	.	.	.
GCA_000580495.2_ASM58049v2	5	.	.	.	.	.	.	.	.	.	.	.	.	.	.	.	.	.	.	.	.	.	.	.	.	.	.	.	.	.	.	.	.	.	.	.	.	.	.	.	.	.	.	.	.	.	.	.	.
GCA_000582965.2_ASM58296v2	4	.	.	.	.	.	.	.	.	.	.	.	.	.	.	.	.	.	.	.	.	.	.	.	.	.	.	.	.	.	.	.	.	.	.	.	.	.	.	.	.	.	.	.	.	.	.	.	.
GCA_000584375.2_ASM58437v2	13	.	.	.	.	.	.	.	.	.	.	.	.	.	100.00	.	.	.	.	.	.	.	.	.	.	.	.	.	.	.	.	100.00	.	.	.	.	.	.	.	.	.	.	.	.	.	.	.	.	.
GCA_000584515.2_ASM58451v2	3	.	.	.	.	.	.	.	.	.	.	.	.	.	.	.	.	.	.	.	.	.	.	.	.	.	.	.	.	.	.	.	.	.	.	.	.	.	.	.	.	.	.	.	.	.	.	.	.
GCA_000588575.2_ASM58857v2	17	.	.	.	.	.	.	.	.	.	.	100.00	.	.	.	.	.	.	.	.	.	.	.	.	.	.	.	.	.	.	.	100.00;100.00	.	.	.	.	82.51	.	.	99.75	.	.	.	.	.	.	.	.	100.00
GCA_000614705.1_ASM61470v1	4	.	.	.	.	.	.	.	.	.	.	.	.	.	.	.	.	.	.	.	.	.	.	.	.	.	.	.	.	.	.	.	.	.	.	.	.	.	.	.	.	.	.	.	.	.	.	.	.
GCA_000671455.1_ASM67145v1	9	.	.	.	.	.	.	.	.	.	.	100.00	.	.	100.00	.	.	.	.	.	.	.	.	.	.	.	.	.	.	.	.	.	.	.	.	.	.	.	.	99.88	.	.	.	.	.	.	.	.	.
GCA_000671695.1_ASM67169v1	12	.	.	.	.	.	.	.	.	.	.	100.00	.	.	.	.	.	.	.	.	.	.	.	.	.	.	.	.	.	.	.	.	.	.	.	.	82.51	.	.	.	.	.	.	.	.	.	.	.	.
GCA_000681715.1_ASM68171v1	6	.	.	.	.	.	.	.	.	.	.	.	.	.	.	.	.	.	.	.	.	.	.	.	.	.	.	.	.	.	.	.	.	.	.	.	.	.	.	.	.	.	.	.	.	.	.	.	.
GCA_000682195.1_ASM68219v1	7	.	.	.	.	.	.	.	.	.	.	.	.	.	.	.	.	.	.	.	.	.	.	.	.	.	.	.	.	.	.	.	.	.	.	.	.	.	.	.	.	.	.	.	.	.	.	.	.
GCA_000682315.1_ASM68231v1	12	.	.	.	.	.	.	.	.	.	.	100.00	.	.	.	.	.	.	.	.	.	.	.	.	.	.	.	.	.	.	.	.	.	.	.	.	82.51	.	.	.	.	.	.	.	.	.	.	.	.
GCA_000682635.1_ASM68263v1	13	.	.	.	.	.	.	.	.	.	.	100.00	.	.	100.00	.	.	.	.	.	.	.	.	.	.	.	.	.	.	.	.	.	.	.	.	.	.	.	.	99.88	.	.	.	.	.	.	.	.	100.00;100.00;100.00
GCA_000784715.1_ASM78471v1	2	.	.	.	.	.	.	.	.	.	.	.	.	.	.	.	.	.	.	.	.	.	.	.	.	.	.	.	.	.	.	.	.	.	.	.	.	.	.	.	.	.	.	.	.	.	.	.	.
GCA_000794125.2_ASM79412v2	9	.	.	.	.	.	.	.	.	.	.	100.00	.	.	.	.	.	.	.	.	.	.	.	.	.	.	.	.	.	.	.	.	.	.	.	.	82.51	.	.	.	.	.	.	.	.	.	.	.	100.00
GCA_000808765.3_Velvet_assembly_of_Acinetobacter_baumannii_ABUH42783	17	.	.	.	.	.	.	.	.	.	.	.	.	.	.	.	.	.	.	.	.	.	.	.	.	.	.	.	.	.	.	.	.	.	.	.	82.51	.	.	99.88	.	.	.	.	.	.	.	.	100.00
GCA_000809885.3_ASM80988v3	17	.	.	.	.	.	.	.	.	.	.	.	.	.	.	.	.	.	.	.	.	.	.	.	.	.	.	.	.	.	.	.	.	.	.	.	82.51	.	.	99.88	.	.	.	.	.	.	.	.	100.00
GCA_000809945.3_ASM80994v3	12	.	.	.	.	.	.	100.00	.	.	.	.	.	.	.	.	.	.	.	.	.	.	.	.	.	.	.	.	.	.	.	.	.	.	.	.	.	.	.	99.88	.	.	.	.	.	71.57	.	.	.
GCA_000810625.3_ASM81062v3	13	.	.	.	.	.	.	.	.	.	.	100.00	.	.	.	.	.	.	.	.	.	.	.	.	.	.	.	.	.	.	.	.	.	.	.	.	82.51	.	.	99.88	.	.	.	.	.	.	.	.	100.00
GCA_000968965.1_ASM96896v1	3	.	.	.	.	.	.	.	.	.	.	.	.	.	.	.	.	.	.	.	.	.	.	.	.	.	.	.	.	.	.	.	.	.	.	.	.	.	.	.	.	.	.	.	.	.	.	.	.
GCA_001420305.1_ASM142030v1	12	.	.	.	.	.	.	.	.	.	.	.	.	.	.	.	.	.	.	.	.	.	.	.	.	.	.	.	.	.	.	.	.	.	.	.	82.30	.	.	99.88	.	.	.	.	.	.	.	.	.
GCA_001420325.1_ASM142032v1	4	.	.	.	.	.	.	.	.	.	.	.	.	.	.	.	.	.	.	.	.	.	.	.	.	.	.	.	.	.	.	.	.	.	.	.	.	.	.	.	.	.	.	.	.	.	.	.	.
GCA_001420335.1_ASM142033v1	12	.	.	.	.	.	.	.	.	.	.	.	.	.	.	.	.	.	.	.	.	.	.	.	.	.	.	.	.	.	.	.	.	.	.	.	82.30	.	.	99.75	.	.	.	.	.	.	.	.	.
GCA_001420385.1_ASM142038v1	15	.	.	.	.	.	.	.	.	.	.	.	.	.	.	.	.	.	.	.	.	.	.	.	.	.	.	.	.	.	.	.	.	.	.	.	82.30	.	.	99.88	.	.	.	.	.	.	.	.	.
GCA_001420405.1_ASM142040v1	10	.	.	.	.	.	.	.	.	.	.	.	.	.	.	.	.	.	.	.	.	.	.	.	.	.	.	.	.	.	.	.	.	.	.	.	82.82	.	.	.	.	.	.	.	.	.	.	.	.
GCA_001432865.1_ASM143286v1	8	.	.	.	.	.	.	.	.	.	.	.	.	.	.	.	.	.	.	.	.	.	.	.	.	.	.	.	97.92	.	.	100.00	.	.	.	.	.	.	.	.	.	.	.	.	.	.	.	.	.
GCA_001511955.1_7521_8_45	12	.	.	.	.	.	.	.	.	.	.	100.00	.	.	.	.	.	.	.	.	.	.	.	.	.	.	.	.	.	.	.	.	.	.	.	.	82.51	.	.	99.88	.	.	.	.	.	.	.	.	100.00
GCA_001535665.1_ASM153566v1	18	.	.	.	.	.	.	.	.	.	.	99.44	.	.	.	.	.	.	.	.	.	.	.	.	.	.	.	.	.	.	.	.	.	.	.	.	.	.	.	99.88;99.88	.	.	.	.	.	.	.	.	.
GCA_001535685.1_ASM153568v1	18	.	.	.	.	.	.	.	.	.	.	99.44	.	.	.	.	.	.	.	.	.	.	.	.	.	.	.	.	.	.	.	.	.	.	.	.	.	.	.	99.88	.	.	.	.	.	.	.	.	.
GCA_001584465.1_ASM158446v1	9	.	.	.	.	.	.	.	.	.	.	100.00	.	.	.	.	.	.	.	.	.	.	.	.	.	.	.	.	.	.	.	.	.	.	.	.	82.51	.	.	.	.	.	.	.	.	.	.	.	.
GCA_001584475.1_ASM158447v1	10	.	.	.	.	.	.	.	.	.	.	.	.	.	.	.	.	.	.	.	.	.	.	.	.	.	.	.	.	.	.	.	.	.	.	.	.	.	.	99.88	.	.	.	.	.	.	.	.	.
GCA_001584485.1_ASM158448v1	10	.	.	.	.	.	.	.	.	.	.	.	.	.	.	.	.	.	.	.	.	.	.	.	.	.	.	.	.	.	.	.	.	.	.	.	.	.	.	99.88	.	.	.	.	.	.	.	.	.
GCA_001628795.1_ASM162879v1	3	.	.	.	.	.	.	.	.	.	.	.	.	.	.	.	.	.	.	.	.	.	.	.	.	.	.	.	.	.	.	.	.	.	.	.	.	.	.	.	.	.	.	.	.	.	.	.	.
GCA_001649695.1_ASM164969v1	12	.	.	.	.	.	.	.	.	.	.	.	.	.	.	.	.	.	.	.	.	.	.	.	.	.	.	.	.	.	.	.	.	.	.	.	82.30	.	.	99.88	.	.	.	.	.	.	.	.	.
GCA_001649735.1_ASM164973v1	9	.	.	.	.	.	.	.	.	.	.	.	.	.	.	.	.	.	.	.	.	.	.	.	.	.	.	.	.	.	.	.	.	.	.	.	82.30	.	.	99.88	.	.	.	.	.	.	.	.	.
GCA_001649885.1_ASM164988v1	10	.	.	.	.	.	.	.	.	.	.	.	.	.	.	.	.	.	.	.	.	.	.	.	.	.	.	.	.	.	.	.	.	.	.	.	82.30	.	.	99.88	.	.	.	.	.	.	.	.	.
GCA_001649915.1_ASM164991v1	11	.	.	.	.	.	.	.	.	.	.	.	.	.	.	.	.	.	.	.	.	.	.	.	.	.	.	.	.	.	.	.	.	.	.	.	82.30	.	.	99.88	.	.	.	.	.	.	.	.	.
GCA_001758155.1_ASM175815v1	4	.	.	.	.	.	.	.	.	.	.	.	.	.	.	.	.	.	.	.	.	.	.	.	.	.	.	.	.	.	.	.	.	.	.	.	.	.	.	.	.	.	.	.	.	.	.	.	.
GCA_001861455.1_ASM186145v1	12	.	.	.	.	.	.	.	.	.	.	.	.	.	.	.	.	.	.	.	.	.	.	.	.	.	.	.	.	.	.	.	.	.	.	.	.	.	.	99.88	.	.	.	.	.	.	.	.	.
GCA_001861565.1_ASM186156v1	5	.	.	.	.	.	.	.	.	.	.	.	.	.	.	.	.	.	.	.	.	.	.	.	.	.	.	.	.	.	.	.	.	.	.	.	.	.	.	.	.	.	.	.	.	.	.	.	.
GCA_001861795.1_ASM186179v1	12	.	.	.	.	.	.	.	.	.	.	.	.	.	.	.	.	.	.	.	.	.	.	.	.	.	.	.	.	.	.	.	.	.	.	.	.	.	.	99.88	.	.	.	.	.	.	.	.	100.00
GCA_001862145.1_ASM186214v1	13	.	.	.	.	.	.	.	.	.	.	.	.	.	.	.	.	.	.	.	.	.	.	.	.	.	.	.	.	.	.	.	.	.	.	.	.	.	.	99.88	.	.	.	.	.	.	.	.	100.00
GCA_001862185.1_ASM186218v1	13	.	.	.	.	.	.	.	.	.	.	.	.	.	.	.	.	.	.	.	.	.	.	.	.	.	.	.	.	.	.	.	.	.	.	.	.	.	.	99.88	.	.	.	.	.	.	.	.	100.00
GCA_001862635.1_ASM186263v1	13	.	.	.	.	.	.	.	.	.	.	100.00	.	.	.	.	.	.	.	.	.	.	.	.	.	.	.	.	.	.	.	.	.	.	.	.	82.51	.	.	99.88	.	.	.	.	.	.	.	.	.
GCA_001862925.1_ASM186292v1	14	.	.	.	.	.	.	.	.	.	.	.	.	.	.	.	.	.	.	.	.	.	.	.	.	.	.	.	.	.	.	.	.	.	.	.	82.51	.	.	.	.	.	.	.	.	.	.	.	100.00
GCA_001863195.1_ASM186319v1	11	.	.	.	.	.	.	.	.	.	.	.	.	.	.	.	.	.	.	.	.	.	.	.	.	.	.	.	.	.	.	.	.	.	.	.	.	.	.	99.88	.	.	.	.	.	.	.	.	.
GCA_001863235.1_ASM186323v1	11	.	.	.	.	.	.	.	.	.	.	.	.	.	.	.	.	.	.	.	.	.	.	.	.	.	.	.	.	.	.	.	.	.	.	.	.	.	.	99.88	.	.	.	.	.	.	.	.	.
GCA_001864275.1_ASM186427v1	12	.	.	.	.	.	.	.	.	.	.	.	.	.	.	.	.	.	.	.	.	.	.	.	.	.	.	.	.	.	.	.	.	.	.	.	.	.	.	99.88	.	.	.	.	.	.	.	.	.
GCA_001864505.1_ASM186450v1	13	.	.	.	.	.	.	.	.	.	.	.	.	.	.	.	.	.	.	.	.	.	.	.	.	.	.	.	.	.	.	.	.	.	.	.	.	.	.	99.88	.	.	.	.	.	.	.	.	92.16
GCA_001864735.1_ASM186473v1	4	.	.	.	.	.	.	.	.	.	.	.	.	.	.	.	.	.	.	.	.	.	.	.	.	.	.	.	.	.	.	.	.	.	.	.	.	.	.	.	.	.	.	.	.	.	.	.	.
GCA_002009115.1_ASM200911v1	11	.	.	.	.	.	.	.	.	.	.	.	.	.	.	.	.	.	.	.	.	.	.	.	.	.	.	.	.	.	.	.	.	.	.	.	.	.	.	99.88	.	.	.	.	.	.	.	.	100.00
GCA_002136865.1_ASM213686v1	14	.	.	.	.	.	.	.	.	.	.	100.00	.	.	100.00	.	.	.	.	.	.	.	.	.	.	.	.	.	.	.	.	.	100.00	.	.	.	.	.	.	99.88	.	.	.	.	.	.	.	.	100.00
GCA_002212205.1_ASM221220v1	9	.	.	.	.	.	.	.	.	.	.	.	.	.	.	.	.	.	.	.	.	.	.	.	.	.	.	.	.	.	.	.	.	.	.	.	.	.	.	99.88	.	.	.	.	.	.	.	.	98.77
GCA_002212395.1_ASM221239v1	8	.	.	.	.	.	.	.	.	.	.	.	.	.	.	.	.	.	.	.	.	.	.	.	.	.	.	.	.	.	.	.	.	.	.	.	.	.	.	99.88	.	.	.	.	.	.	.	.	.
GCA_002212475.1_ASM221247v1	6	.	.	.	.	.	.	.	.	.	.	.	.	.	.	.	.	.	.	.	.	.	.	.	.	.	.	.	.	.	.	.	.	.	.	.	.	.	.	.	.	.	.	.	.	.	.	.	.
GCA_002212545.1_ASM221254v1	10	.	.	.	.	.	.	.	.	.	.	.	.	.	.	.	.	.	.	.	.	.	.	.	.	.	.	.	.	.	.	.	.	.	.	.	.	.	.	99.88	.	.	.	.	.	.	.	.	93.63
GCA_002277455.1_ASM227745v1	18	.	.	.	.	.	.	.	.	.	.	.	.	.	.	.	.	.	.	.	.	.	.	.	.	.	.	.	.	.	.	.	.	.	.	.	82.51	.	.	99.88	.	.	.	.	.	.	.	.	100.00
GCA_002277575.1_ASM227757v1	15	.	.	.	.	.	.	.	.	.	.	100.00	.	.	.	.	.	.	.	.	.	.	.	.	.	.	.	.	.	.	.	.	.	.	.	.	82.51	.	.	99.88	.	.	.	.	.	.	.	.	100.00
GCA_002277645.1_ASM227764v1	16	.	.	.	.	.	.	.	.	.	.	.	.	.	.	.	.	.	.	.	.	.	.	.	.	.	.	.	.	.	.	.	.	.	.	.	82.51	.	.	99.88	.	.	.	.	.	.	.	.	.
GCA_002321775.1_ASM232177v1	2	.	.	.	.	.	.	.	.	.	.	.	.	.	.	.	.	.	.	.	.	.	.	.	.	.	.	.	.	.	.	.	.	.	.	.	.	.	.	.	.	.	.	.	.	.	.	.	.
GCA_002332605.1_ASM233260v1	5	.	.	.	.	.	.	.	.	.	.	.	.	.	.	.	.	.	.	.	.	.	.	.	.	.	.	.	.	.	.	.	.	.	.	.	.	.	.	.	.	.	.	.	.	.	.	.	.
GCA_002341705.1_ASM234170v1	2	.	.	.	.	.	.	.	.	.	.	.	.	.	.	.	.	.	.	.	.	.	.	.	.	.	.	.	.	.	.	.	.	.	.	.	.	.	.	.	.	.	.	.	.	.	.	.	.
GCA_002341785.1_ASM234178v1	2	.	.	.	.	.	.	.	.	.	.	.	.	.	.	.	.	.	.	.	.	.	.	.	.	.	.	.	.	.	.	.	.	.	.	.	.	.	.	.	.	.	.	.	.	.	.	.	.
GCA_002364895.1_ASM236489v1	2	.	.	.	.	.	.	.	.	.	.	.	.	.	.	.	.	.	.	.	.	.	.	.	.	.	.	.	.	.	.	.	.	.	.	.	.	.	.	.	.	.	.	.	.	.	.	.	.
GCA_002386695.1_ASM238669v1	3	.	.	.	.	.	.	.	.	.	.	.	.	.	.	.	.	.	.	.	.	.	.	.	.	.	.	.	.	.	.	.	.	.	.	.	.	.	.	.	.	.	.	.	.	.	.	.	.
GCA_002389145.1_ASM238914v1	3	.	.	.	.	.	.	.	.	.	.	.	.	.	.	.	.	.	.	.	.	.	.	.	.	.	.	.	.	.	.	.	.	.	.	.	.	.	.	.	.	.	.	.	.	.	.	.	.
GCA_002439345.1_ASM243934v1	2	.	.	.	.	.	.	.	.	.	.	.	.	.	.	.	.	.	.	.	.	.	.	.	.	.	.	.	.	.	.	.	.	.	.	.	.	.	.	.	.	.	.	.	.	.	.	.	.
GCA_002500525.1_ASM250052v1	3	.	.	.	.	.	.	.	.	.	.	.	.	.	.	.	.	.	.	.	.	.	.	.	.	.	.	.	.	.	.	.	.	.	.	.	.	.	.	.	.	.	.	.	.	.	.	.	.
GCA_002762545.2_ASM276254v2	20	.	100.00	.	.	.	.	.	.	.	.	.	.	.	.	.	.	.	.	.	.	.	.	.	.	.	.	.	.	.	.	.	.	.	.	.	82.51	.	.	99.88	.	.	.	.	.	.	.	.	100.00
GCA_002837885.3_ASM283788v3	13	.	.	.	.	.	.	.	.	.	.	.	.	.	.	.	.	.	.	.	.	.	.	.	.	.	.	.	.	.	.	.	.	.	72.28	.	.	.	.	.	.	.	.	.	.	.	.	.	.
GCA_003007195.1_ASM300719v1	9	.	.	.	.	.	.	.	.	.	.	.	.	.	.	.	.	.	.	.	.	.	.	.	.	.	.	.	.	.	.	.	.	.	.	.	.	.	.	99.88	.	.	.	.	.	.	.	.	100.00
GCA_003007285.1_ASM300728v1	12	.	.	.	.	.	.	.	.	.	.	.	.	.	.	.	.	.	.	.	.	.	.	.	.	.	.	.	.	.	.	.	.	.	.	.	.	.	.	99.88	.	.	.	.	.	.	.	.	.
GCA_003007315.1_ASM300731v1	11	.	.	.	.	.	.	.	.	.	.	.	.	.	.	.	.	.	.	.	.	.	.	.	.	.	.	.	.	.	.	.	.	.	.	.	.	.	.	99.88	.	.	.	.	.	.	.	.	100.00
GCA_003012895.3_ASM301289v3	3	.	.	.	.	.	.	.	.	.	.	.	.	.	.	.	.	.	.	.	.	.	.	.	.	.	.	.	.	.	.	.	.	.	.	.	.	.	.	.	.	.	.	.	.	.	.	.	.
GCA_003039095.1_ASM303909v1	9	.	.	.	.	.	.	.	.	.	.	100.00	.	.	.	.	.	.	.	.	.	.	.	.	.	.	.	.	.	.	.	.	.	.	.	.	82.51	.	.	.	.	.	.	.	.	.	.	.	.
GCA_003039235.1_ASM303923v1	16	.	.	.	.	.	.	.	.	.	.	100.00	.	.	.	.	.	.	.	.	.	.	.	.	.	.	.	.	.	.	.	.	.	.	.	.	82.51	.	.	99.88	.	.	.	.	.	.	.	.	.
GCA_003185745.1_ASM318574v1	16	.	.	.	.	.	.	.	.	.	.	100.00	.	.	.	.	.	.	.	.	.	.	.	.	.	.	.	.	.	.	.	.	.	.	.	.	82.51;82.30	.	.	99.88	.	.	.	.	.	.	.	.	100.00
GCA_003185755.1_ASM318575v1	9	.	.	.	.	.	.	.	.	.	.	91.39	.	.	.	.	.	.	.	.	.	.	.	.	.	.	.	.	.	.	.	.	.	.	.	.	82.51	.	.	.	.	.	.	.	.	.	.	.	.
GCA_003335925.1_ASM333592v1	13	.	.	.	.	.	.	.	.	.	.	.	.	.	.	.	.	.	.	.	.	.	.	.	.	.	.	.	.	.	.	.	.	.	.	.	.	.	.	99.88	.	.	.	.	.	.	.	.	100.00
GCA_003335995.1_ASM333599v1	11	.	.	.	.	.	.	.	.	.	.	100.00	.	.	.	.	.	.	.	.	.	.	.	.	.	.	.	.	.	.	.	.	.	.	.	.	82.51	.	.	99.88	.	.	.	.	.	.	.	.	.
GCA_003336115.1_ASM333611v1	5	.	.	.	.	.	.	.	.	.	.	.	.	.	.	.	.	.	.	.	.	.	.	.	.	.	.	.	.	.	.	.	.	.	.	.	.	.	.	.	.	.	.	.	.	.	.	.	.
GCA_003336135.1_ASM333613v1	7	.	.	.	.	.	.	.	.	.	.	.	.	.	.	.	.	.	.	.	.	.	.	.	.	.	.	.	.	.	.	.	.	.	.	.	.	.	.	.	.	.	.	.	.	.	.	.	.
GCA_003352565.1_ASM335256v1	18	.	.	.	.	.	.	.	.	.	.	.	.	.	.	.	.	.	.	.	.	.	.	.	.	.	.	.	.	.	.	.	.	.	.	.	82.51	.	.	99.88	.	.	.	.	.	.	.	.	100.00
GCA_003359255.2_ASM335925v2	17	.	.	.	.	.	.	.	.	.	.	.	.	.	.	.	.	.	.	.	.	.	.	.	.	.	.	.	.	.	.	.	.	.	.	.	82.51	.	.	99.88	.	.	.	.	.	.	.	.	99.88;100.00
GCA_003540785.1_ASM354078v1	1	.	.	.	.	.	.	.	.	.	.	.	.	.	.	.	.	.	.	.	.	.	.	.	.	.	.	.	.	.	.	.	.	.	.	.	.	.	.	.	.	.	.	.	.	.	.	.	.
GCA_003577545.1_ASM357754v1	3	.	.	.	.	.	.	.	.	.	.	.	.	.	.	.	.	.	.	.	.	.	.	.	.	.	.	.	.	.	.	.	.	.	.	.	.	.	.	.	.	.	.	.	.	.	.	.	.
GCA_003627485.2_ASM362748v2	22	.	100.00	.	.	.	.	.	.	.	.	.	.	.	.	.	.	.	.	.	.	.	.	.	.	.	.	.	.	.	.	.	.	.	.	.	82.51	.	.	99.88	.	.	.	.	.	.	.	.	100.00
GCA_003711905.1_ASM371190v1	15	.	.	.	.	.	.	.	.	.	.	100.00	.	.	.	.	.	.	.	.	.	.	.	.	.	.	.	.	.	.	.	.	.	.	.	.	82.20	.	.	99.88	.	.	.	.	.	.	.	.	100.00
GCA_003843625.1_ASM384362v1	5	.	.	.	.	.	.	.	.	.	.	.	.	.	.	.	.	.	.	.	.	.	.	.	.	.	.	.	.	.	.	.	.	.	.	.	.	.	.	.	.	.	.	.	.	.	.	.	.
GCA_003843645.1_ASM384364v1	14	.	.	.	.	.	.	.	.	.	.	100.00	.	.	.	.	.	.	.	.	.	.	.	.	.	79.17	.	.	.	.	.	.	.	.	.	.	82.51	.	.	.	.	.	.	.	.	.	.	.	.
GCA_003843655.1_ASM384365v1	12	.	.	.	.	.	.	.	.	.	.	100.00	.	.	.	.	.	.	.	.	.	.	.	.	.	.	.	.	.	.	.	.	.	.	.	.	82.51;82.51	.	.	.	.	.	.	.	.	.	.	.	.
GCA_003843665.1_ASM384366v1	18	.	.	.	.	.	.	.	.	.	.	.	94.13;94.13	.	.	.	.	.	.	.	.	.	.	.	.	.	.	.	.	.	.	.	.	.	.	.	82.51	.	.	99.88	.	.	.	.	.	.	.	.	100.00
GCA_003843735.1_ASM384373v1	13	.	.	.	.	.	.	.	.	.	.	100.00	.	.	100.00	.	.	.	.	.	.	.	.	.	.	.	.	.	.	.	.	.	.	.	.	.	.	.	.	99.88	.	.	.	.	.	.	.	.	100.00
GCA_003843775.1_ASM384377v1	8	.	.	.	.	.	.	.	.	.	.	.	.	.	.	100.00	.	.	.	.	.	.	.	.	.	.	.	.	.	.	.	.	.	.	.	.	.	.	.	99.75	.	.	.	.	.	.	.	.	.
GCA_003949475.1_ASM394947v1	11	.	.	.	.	.	.	.	.	.	.	.	.	.	.	.	.	.	.	.	.	.	.	.	.	.	.	.	97.92	.	.	.	100.00	.	.	.	.	.	.	.	.	.	.	.	.	.	100.00	.	.
GCA_003949675.1_ASM394967v1	6	.	.	.	.	.	.	.	.	.	.	.	.	.	.	.	.	.	.	.	.	.	.	.	.	.	.	.	.	.	.	.	.	.	.	.	.	.	.	.	.	.	.	.	.	.	.	.	78.06
GCA_004101965.1_ASM410196v1	15	.	.	.	.	.	.	.	.	.	.	.	.	.	.	.	.	.	.	.	.	.	.	.	.	.	.	.	.	.	.	.	.	.	.	.	82.51	.	.	99.88	.	.	.	.	.	.	.	.	100.00
GCA_004101985.1_ASM410198v1	17	.	.	.	.	.	.	.	.	.	.	.	.	.	.	.	.	.	.	.	.	.	.	.	.	.	.	.	.	.	.	.	.	.	.	.	82.51	.	.	99.88	.	.	.	.	.	.	.	.	100.00
GCA_004357215.1_ASM435721v1	14	.	.	.	.	.	.	.	.	.	.	100.00	.	.	.	.	.	.	.	.	.	.	.	.	.	.	.	.	.	.	.	.	100.00	.	.	.	.	.	.	99.88	.	.	.	.	.	.	.	.	.
GCA_004794165.2_ASM479416v2	18	.	100.00	.	.	.	.	.	.	.	.	.	.	.	.	.	.	.	.	.	.	.	.	.	.	.	.	.	.	.	.	.	.	.	.	.	.	.	.	99.88	.	.	.	.	.	.	.	.	.
GCA_005280355.1_ASM528035v1	13	.	.	.	.	.	.	.	.	.	.	.	.	.	.	.	.	.	.	.	.	.	.	.	.	.	.	.	.	.	.	.	.	.	.	.	.	.	.	99.88;99.88	.	.	.	.	.	.	.	.	76.72
GCA_005280395.1_ASM528039v1	16	.	100.00	.	.	.	.	.	.	.	.	.	.	.	.	.	.	.	.	.	.	.	.	.	.	.	.	.	.	.	.	.	.	.	.	.	.	.	.	99.88	.	.	.	.	.	.	.	.	.
GCA_005280415.1_ASM528041v1	9	.	.	.	.	.	.	.	.	.	.	.	.	.	.	.	.	.	.	.	.	.	.	.	.	.	.	.	.	.	.	.	.	.	.	.	.	.	.	.	.	.	.	.	.	.	.	.	.
GCA_006937685.1_ASM693768v1	13	.	.	.	.	.	.	.	.	.	.	.	.	.	.	.	.	.	.	.	.	.	.	.	.	.	.	.	.	.	.	.	.	.	.	.	.	.	.	99.88	.	.	.	.	.	.	.	.	100.00
GCA_007113735.1_ASM711373v1	13	.	.	.	.	.	.	.	.	.	.	.	.	.	.	.	.	.	.	.	.	.	.	.	.	.	.	.	.	.	.	.	.	.	.	.	.	.	.	99.88	.	.	.	.	.	.	.	.	100.00
GCA_007115075.1_ASM711507v1	13	.	.	.	.	.	.	.	.	.	.	.	.	.	.	.	.	.	.	.	.	.	.	.	.	.	.	.	.	.	.	.	.	.	.	.	.	.	.	99.88	.	.	.	.	.	.	.	.	100.00
GCA_007999245.1_ASM799924v1	13	.	.	.	.	.	.	.	.	.	.	.	.	.	.	.	.	.	.	.	.	.	.	.	.	.	.	.	.	.	.	.	.	.	.	.	.	.	.	99.88	.	.	.	.	.	.	.	.	.
GCA_007999275.1_ASM799927v1	12	.	.	.	.	.	.	.	.	.	.	.	.	.	.	.	.	.	.	.	.	.	.	.	.	.	.	.	.	.	.	.	.	.	.	.	.	.	.	99.88	.	.	.	.	.	.	.	.	.
GCA_007999295.1_ASM799929v1	12	.	.	.	.	.	.	.	.	.	.	.	.	.	.	.	.	.	.	.	.	.	.	.	.	.	.	.	.	.	.	.	.	.	.	.	.	.	.	99.88	.	.	.	.	.	.	.	.	.
GCA_007999375.1_ASM799937v1	14	.	.	.	.	.	.	.	.	.	.	.	.	.	.	.	.	.	.	.	.	.	.	.	.	.	.	.	.	.	.	.	.	.	.	.	.	.	.	99.88	.	.	.	.	.	.	.	.	74.39
GCA_007999395.1_ASM799939v1	12	.	.	.	.	.	.	.	.	.	.	.	.	.	.	.	.	.	.	.	.	.	.	.	.	.	.	.	.	.	.	.	.	.	.	.	.	.	.	99.88	.	.	.	.	.	.	.	.	.
GCA_007999505.1_ASM799950v1	11	.	.	.	.	.	.	.	.	.	.	.	.	.	.	.	.	.	.	.	.	.	.	.	.	.	.	.	.	.	.	.	.	.	.	.	.	.	.	99.88	.	.	.	.	.	.	.	.	.
GCA_007999845.1_ASM799984v1	13	.	.	.	.	.	.	.	.	.	.	.	.	.	.	.	.	.	.	.	.	.	.	.	.	.	.	.	.	.	.	.	.	.	.	.	.	.	.	99.88	.	.	.	.	.	.	.	.	100.00
GCA_007999965.1_ASM799996v1	16	.	.	.	.	.	.	.	.	.	.	.	.	.	.	.	.	.	.	.	.	.	.	.	.	.	.	.	.	.	.	.	.	.	.	.	82.51	.	.	99.88	.	.	.	.	.	.	.	.	.
GCA_008000165.1_ASM800016v1	11	.	.	.	.	.	.	.	.	.	.	.	.	.	.	.	.	.	.	.	.	.	.	.	.	.	.	.	.	.	.	.	.	.	.	.	.	.	.	99.88	.	.	.	.	.	.	.	.	100.00
GCA_008000185.1_ASM800018v1	10	.	.	.	.	.	.	.	.	.	.	.	.	.	.	.	.	.	.	.	.	.	.	.	.	.	.	.	.	.	.	.	.	.	.	.	.	.	.	99.88	.	.	.	.	.	.	.	.	.
GCA_008000225.1_ASM800022v1	13	.	.	.	.	.	.	.	.	.	.	.	.	.	.	.	.	.	.	.	.	.	.	.	.	.	.	.	.	.	.	.	.	.	.	.	.	.	.	99.88	.	.	.	.	.	.	.	.	100.00
GCA_008365335.2_ASM836533v2	7	.	.	.	.	.	.	.	.	.	.	.	.	.	.	.	.	.	.	.	.	.	.	.	.	.	.	.	.	.	.	.	.	.	.	.	.	.	.	.	.	.	.	.	.	.	.	.	.
GCA_008630265.1_ASM863026v1	13	.	.	.	.	.	.	.	.	.	.	.	.	.	.	.	.	.	.	.	.	.	.	.	.	.	.	.	.	.	.	.	.	.	.	.	.	.	.	99.88	.	.	.	.	.	.	.	.	100.00
GCA_008630275.1_ASM863027v1	12	.	.	.	.	.	.	.	.	.	.	.	.	.	.	.	.	.	.	.	.	.	.	.	.	.	.	.	.	.	.	.	.	.	.	.	82.51	.	.	.	.	.	.	.	.	.	.	.	100.00
GCA_008709595.1_AB_5326	14	.	100.00	.	.	.	.	.	.	.	.	.	.	.	.	.	.	.	.	.	.	.	.	.	.	.	.	.	.	.	.	.	.	.	.	.	.	.	.	.	.	.	.	.	.	.	.	.	.
GCA_008709655.1_AB2992	19	.	100.00	.	.	.	100.00	.	.	.	.	.	.	.	.	100.00	.	.	.	.	.	.	.	.	.	.	.	.	.	.	.	.	.	.	.	.	.	.	.	99.88	.	.	.	.	.	.	.	.	.
GCA_008975425.1_ASM897542v1	14	.	.	.	.	.	.	.	.	.	.	.	.	.	.	.	.	.	.	.	.	.	.	.	.	.	.	.	.	.	.	.	.	.	.	.	82.51	.	.	99.88	.	.	.	.	.	.	.	.	.
GCA_008975545.1_ASM897554v1	3	.	.	.	.	.	.	.	.	.	.	.	.	.	.	.	.	.	.	.	.	.	.	.	.	.	.	.	.	.	.	.	.	.	.	.	.	.	.	.	.	.	.	.	.	.	.	.	.
GCA_008975665.1_ASM897566v1	2	.	.	.	.	.	.	.	.	.	.	.	.	.	.	.	.	.	.	.	.	.	.	.	.	.	.	.	.	.	.	.	.	.	.	.	.	.	.	.	.	.	.	.	.	.	.	.	.
GCA_008975885.1_ASM897588v1	14	.	.	.	.	.	.	.	.	.	.	.	.	.	.	.	.	.	.	.	.	.	.	.	.	.	.	.	.	.	.	.	.	.	.	.	82.51	.	.	99.88	.	.	.	.	.	.	.	.	.
GCA_008976005.1_ASM897600v1	14	.	.	.	.	.	.	.	.	.	.	.	.	.	.	.	.	.	.	.	.	.	.	.	.	.	.	.	.	.	.	.	.	.	.	.	82.51	.	.	99.88	.	.	.	.	.	.	.	.	.
GCA_008976125.1_ASM897612v1	14	.	.	.	.	.	.	.	.	.	.	.	.	.	.	.	.	.	.	.	.	.	.	.	.	.	.	.	.	.	.	.	.	.	.	.	82.51	.	.	99.88	.	.	.	.	.	.	.	.	.
GCA_008976225.1_ASM897622v1	3	.	.	.	.	.	.	.	.	.	.	.	.	.	.	.	.	.	.	.	.	.	.	.	.	.	.	.	.	.	.	.	.	.	.	.	.	.	.	.	.	.	.	.	.	.	.	.	.
GCA_008976305.1_ASM897630v1	3	.	.	.	.	.	.	.	.	.	.	.	.	.	.	.	.	.	.	.	.	.	.	.	.	.	.	.	.	.	.	.	.	.	.	.	.	.	.	.	.	.	.	.	.	.	.	.	.
GCA_008976435.1_ASM897643v1	14	.	.	.	.	.	.	.	.	.	.	.	.	.	.	.	.	.	.	.	.	.	.	.	.	.	.	.	.	.	.	.	.	.	.	.	82.51	.	.	99.88	.	.	.	.	.	.	.	.	.
GCA_008976525.1_ASM897652v1	3	.	.	.	.	.	.	.	.	.	.	.	.	.	.	.	.	.	.	.	.	.	.	.	.	.	.	.	.	.	.	.	.	.	.	.	.	.	.	.	.	.	.	.	.	.	.	.	.
GCA_008976645.1_ASM897664v1	3	.	.	.	.	.	.	.	.	.	.	.	.	.	.	.	.	.	.	.	.	.	.	.	.	.	.	.	.	.	.	.	.	.	.	.	.	.	.	.	.	.	.	.	.	.	.	.	.
GCA_008976715.1_ASM897671v1	3	.	.	.	.	.	.	.	.	.	.	.	.	.	.	.	.	.	.	.	.	.	.	.	.	.	.	.	.	.	.	.	.	.	.	.	.	.	.	.	.	.	.	.	.	.	.	.	.
GCA_008976805.1_ASM897680v1	3	.	.	.	.	.	.	.	.	.	.	.	.	.	.	.	.	.	.	.	.	.	.	.	.	.	.	.	.	.	.	.	.	.	.	.	.	.	.	.	.	.	.	.	.	.	.	.	.
GCA_008976925.1_ASM897692v1	3	.	.	.	.	.	.	.	.	.	.	.	.	.	.	.	.	.	.	.	.	.	.	.	.	.	.	.	.	.	.	.	.	.	.	.	.	.	.	.	.	.	.	.	.	.	.	.	.
GCA_008977145.1_ASM897714v1	3	.	.	.	.	.	.	.	.	.	.	.	.	.	.	.	.	.	.	.	.	.	.	.	.	.	.	.	.	.	.	.	.	.	.	.	.	.	.	.	.	.	.	.	.	.	.	.	.
GCA_008977265.1_ASM897726v1	4	.	.	.	.	.	.	.	.	.	.	.	.	.	.	.	.	80.86	.	.	.	.	.	.	.	.	.	.	.	.	.	.	.	.	.	.	.	.	.	.	.	.	.	.	.	.	.	.	.
GCA_008977405.1_ASM897740v1	3	.	.	.	.	.	.	.	.	.	.	.	.	.	.	.	.	.	.	.	.	.	.	.	.	.	.	.	.	.	.	.	.	.	.	.	.	.	.	.	.	.	.	.	.	.	.	.	.
GCA_008977785.1_ASM897778v1	3	.	.	.	.	.	.	.	.	.	.	.	.	.	.	.	.	.	.	.	.	.	.	.	.	.	.	.	.	.	.	.	.	.	.	.	.	.	.	.	.	.	.	.	.	.	.	.	.
GCA_008977905.1_ASM897790v1	3	.	.	.	.	.	.	.	.	.	.	.	.	.	.	.	.	.	.	.	.	.	.	.	.	.	.	.	.	.	.	.	.	.	.	.	.	.	.	.	.	.	.	.	.	.	.	.	.
GCA_008978025.1_ASM897802v1	3	.	.	.	.	.	.	.	.	.	.	.	.	.	.	.	.	.	.	.	.	.	.	.	.	.	.	.	.	.	.	.	.	.	.	.	.	.	.	.	.	.	.	.	.	.	.	.	.
GCA_008978265.1_ASM897826v1	2	.	.	.	.	.	.	.	.	.	.	.	.	.	.	.	.	.	.	.	.	.	.	.	.	.	.	.	.	.	.	.	.	.	.	.	.	.	.	.	.	.	.	.	.	.	.	.	.
GCA_008978365.1_ASM897836v1	3	.	.	.	.	.	.	.	.	.	.	.	.	.	.	.	.	.	.	.	.	.	.	.	.	.	.	.	.	.	.	.	.	.	.	.	.	.	.	.	.	.	.	.	.	.	.	.	.
GCA_008978385.1_ASM897838v1	2	.	.	.	.	.	.	.	.	.	.	.	.	.	.	.	.	.	.	.	.	.	.	.	.	.	.	.	.	.	.	.	.	.	.	.	.	.	.	.	.	.	.	.	.	.	.	.	.
GCA_008978405.1_ASM897840v1	3	.	.	.	.	.	.	.	.	.	.	.	.	.	.	.	.	.	.	.	.	.	.	.	.	.	.	.	.	.	.	.	.	.	.	.	.	.	.	.	.	.	.	.	.	.	.	.	.
GCA_008978445.1_ASM897844v1	3	.	.	.	.	.	.	.	.	.	.	.	.	.	.	.	.	.	.	.	.	.	.	.	.	.	.	.	.	.	.	.	.	.	.	.	.	.	.	.	.	.	.	.	.	.	.	.	.
GCA_008978465.1_ASM897846v1	3	.	.	.	.	.	.	.	.	.	.	.	.	.	.	.	.	.	.	.	.	.	.	.	.	.	.	.	.	.	.	.	.	.	.	.	.	.	.	.	.	.	.	.	.	.	.	.	.
GCA_008978625.1_ASM897862v1	3	.	.	.	.	.	.	.	.	.	.	.	.	.	.	.	.	.	.	.	.	.	.	.	.	.	.	.	.	.	.	.	.	.	.	.	.	.	.	.	.	.	.	.	.	.	.	.	.
GCA_008978745.1_ASM897874v1	9	.	.	.	.	.	.	.	.	.	.	.	.	.	.	.	.	.	.	.	.	.	.	.	.	.	.	.	.	.	.	.	.	.	.	.	82.51	.	.	99.88	.	.	.	.	.	.	.	.	.
GCA_008978835.1_ASM897883v1	9	.	.	.	.	.	.	.	.	.	.	.	.	.	.	.	.	.	.	.	.	.	.	.	.	.	.	.	.	.	.	.	.	.	.	.	82.51	.	.	99.88	.	.	.	.	.	.	.	.	.
GCA_008978925.1_ASM897892v1	9	.	.	.	.	.	.	.	.	.	.	.	.	.	.	.	.	.	.	.	.	.	.	.	.	.	.	.	.	.	.	.	.	.	.	.	82.51	.	.	99.88	.	.	.	.	.	.	.	.	.
GCA_008979045.1_ASM897904v1	9	.	.	.	.	.	.	.	.	.	.	.	.	.	.	.	.	.	.	.	.	.	.	.	.	.	.	.	.	.	.	.	.	.	.	.	82.51	.	.	99.88	.	.	.	.	.	.	.	.	.
GCA_008979145.1_ASM897914v1	9	.	.	.	.	.	.	.	.	.	.	.	.	.	.	.	.	.	.	.	.	.	.	.	.	.	.	.	.	.	.	.	.	.	.	.	82.51	.	.	99.88	.	.	.	.	.	.	.	.	.
GCA_008979265.1_ASM897926v1	9	.	.	.	.	.	.	.	.	.	.	.	.	.	.	.	.	.	.	.	.	.	.	.	.	.	.	.	.	.	.	.	.	.	.	.	82.51	.	.	99.88	.	.	.	.	.	.	.	.	.
GCA_008979525.1_ASM897952v1	3	.	.	.	.	.	.	.	.	.	.	.	.	.	.	.	.	.	.	.	.	.	.	.	.	.	.	.	.	.	.	.	.	.	.	.	.	.	.	.	.	.	.	.	.	.	.	.	.
GCA_008980025.1_ASM898002v1	3	.	.	.	.	.	.	.	.	.	.	.	.	.	.	.	.	.	.	.	.	.	.	.	.	.	.	.	.	.	.	.	.	.	.	.	.	.	.	.	.	.	.	.	.	.	.	.	.
GCA_008981025.1_ASM898102v1	3	.	.	.	.	.	.	.	.	.	.	.	.	.	.	.	.	.	.	.	.	.	.	.	.	.	.	.	.	.	.	.	.	.	.	.	.	.	.	.	.	.	.	.	.	.	.	.	.
GCA_008981345.1_ASM898134v1	3	.	.	.	.	.	.	.	.	.	.	.	.	.	.	.	.	.	.	.	.	.	.	.	.	.	.	.	.	.	.	.	.	.	.	.	.	.	.	.	.	.	.	.	.	.	.	.	.
GCA_008981885.1_ASM898188v1	10	.	.	.	.	.	.	.	.	.	.	.	.	.	.	.	.	.	.	.	.	.	.	.	.	.	.	.	.	.	.	.	.	.	.	.	.	.	.	.	.	.	.	.	.	.	.	.	.
GCA_008981985.1_ASM898198v1	3	.	.	.	.	.	.	.	.	.	.	.	.	.	.	.	.	.	.	.	.	.	.	.	.	.	.	.	.	.	.	.	.	.	.	.	.	.	.	.	.	.	.	.	.	.	.	.	.
GCA_008982025.1_ASM898202v1	3	.	.	.	.	.	.	.	.	.	.	.	.	.	.	.	.	.	.	.	.	.	.	.	.	.	.	.	.	.	.	.	.	.	.	.	.	.	.	.	.	.	.	.	.	.	.	.	.
GCA_008982225.1_ASM898222v1	3	.	.	.	.	.	.	.	.	.	.	.	.	.	.	.	.	.	.	.	.	.	.	.	.	.	.	.	.	.	.	.	.	.	.	.	.	.	.	.	.	.	.	.	.	.	.	.	.
GCA_008982245.1_ASM898224v1	3	.	.	.	.	.	.	.	.	.	.	.	.	.	.	.	.	.	.	.	.	.	.	.	.	.	.	.	.	.	.	.	.	.	.	.	.	.	.	.	.	.	.	.	.	.	.	.	.
GCA_008982265.1_ASM898226v1	5	.	.	.	.	.	.	.	.	.	.	.	.	.	.	.	.	.	.	.	.	.	.	.	.	.	.	.	.	.	.	.	.	.	.	.	.	.	.	.	.	.	.	.	.	.	.	.	.
GCA_008982305.1_ASM898230v1	3	.	.	.	.	.	.	.	.	.	.	.	.	.	.	.	.	.	.	.	.	.	.	.	.	.	.	.	.	.	.	.	.	.	.	.	.	.	.	.	.	.	.	.	.	.	.	.	.
GCA_008983395.1_ASM898339v1	3	.	.	.	.	.	.	.	.	.	.	.	.	.	.	.	.	.	.	.	.	.	.	.	.	.	.	.	.	.	.	.	.	.	.	.	.	.	.	.	.	.	.	.	.	.	.	.	.
GCA_008984025.1_ASM898402v1	3	.	.	.	.	.	.	.	.	.	.	.	.	.	.	.	.	.	.	.	.	.	.	.	.	.	.	.	.	.	.	.	.	.	.	.	.	.	.	.	.	.	.	.	.	.	.	.	.
GCA_008984085.1_ASM898408v1	3	.	.	.	.	.	.	.	.	.	.	.	.	.	.	.	.	.	.	.	.	.	.	.	.	.	.	.	.	.	.	.	.	.	.	.	.	.	.	.	.	.	.	.	.	.	.	.	.
GCA_008984285.1_ASM898428v1	3	.	.	.	.	.	.	.	.	.	.	.	.	.	.	.	.	.	.	.	.	.	.	.	.	.	.	.	.	.	.	.	.	.	.	.	.	.	.	.	.	.	.	.	.	.	.	.	.
GCA_008984505.1_ASM898450v1	3	.	.	.	.	.	.	.	.	.	.	.	.	.	.	.	.	.	.	.	.	.	.	.	.	.	.	.	.	.	.	.	.	.	.	.	.	.	.	.	.	.	.	.	.	.	.	.	.
GCA_008984715.1_ASM898471v1	9	.	.	.	.	.	.	.	.	.	.	.	.	.	.	.	.	.	.	.	.	.	.	.	.	.	.	.	.	.	.	.	.	.	.	.	.	.	.	99.88	.	.	.	.	.	.	.	.	.
GCA_008984805.1_ASM898480v1	3	.	.	.	.	.	.	.	.	.	.	.	.	.	.	.	.	.	.	.	.	.	.	.	.	.	.	.	.	.	.	.	.	.	.	.	.	.	.	.	.	.	.	.	.	.	.	.	.
GCA_008984905.1_ASM898490v1	3	.	.	.	.	.	.	.	.	.	.	.	.	.	.	.	.	.	.	.	.	.	.	.	.	.	.	.	.	.	.	.	.	.	.	.	.	.	.	.	.	.	.	.	.	.	.	.	.
GCA_008985025.1_ASM898502v1	14	.	.	.	.	.	.	.	.	.	.	.	.	.	.	.	.	.	.	.	.	.	.	.	.	.	.	.	.	.	.	.	.	.	.	.	82.51	.	.	99.88	.	.	.	.	.	.	.	.	.
GCA_008985065.1_ASM898506v1	3	.	.	.	.	.	.	.	.	.	.	.	.	.	.	.	.	.	.	.	.	.	.	.	.	.	.	.	.	.	.	.	.	.	.	.	.	.	.	.	.	.	.	.	.	.	.	.	.
GCA_008985085.1_ASM898508v1	16	.	.	.	.	.	.	.	.	.	.	100.00	.	.	.	.	.	.	.	.	.	.	.	.	.	.	.	.	.	.	.	.	.	.	.	.	82.51	.	.	99.88	.	.	.	.	.	.	.	.	100.00
GCA_008985145.1_ASM898514v1	3	.	.	.	.	.	.	.	.	.	.	.	.	.	.	.	.	.	.	.	.	.	.	.	.	.	.	.	.	.	.	.	.	.	.	.	.	.	.	.	.	.	.	.	.	.	.	.	.
GCA_008985165.1_ASM898516v1	3	.	.	.	.	.	.	.	.	.	.	.	.	.	.	.	.	.	.	.	.	.	.	.	.	.	.	.	.	.	.	.	.	.	.	.	.	.	.	.	.	.	.	.	.	.	.	.	.
GCA_008985245.1_ASM898524v1	3	.	.	.	.	.	.	.	.	.	.	.	.	.	.	.	.	.	.	.	.	.	.	.	.	.	.	.	.	.	.	.	.	.	.	.	.	.	.	.	.	.	.	.	.	.	.	.	.
GCA_008985285.1_ASM898528v1	3	.	.	.	.	.	.	.	.	.	.	.	.	.	.	.	.	.	.	.	.	.	.	.	.	.	.	.	.	.	.	.	.	.	.	.	.	.	.	.	.	.	.	.	.	.	.	.	.
GCA_008985405.1_ASM898540v1	3	.	.	.	.	.	.	.	.	.	.	.	.	.	.	.	.	.	.	.	.	.	.	.	.	.	.	.	.	.	.	.	.	.	.	.	.	.	.	.	.	.	.	.	.	.	.	.	.
GCA_008985715.1_ASM898571v1	15	.	.	.	.	.	.	.	.	.	.	100.00	.	.	.	.	.	.	.	.	.	.	.	.	.	.	.	.	.	.	.	.	.	.	.	.	82.51	.	.	99.88	.	.	.	.	.	.	.	.	.
GCA_008985845.1_ASM898584v1	12	.	.	.	.	.	.	.	.	.	.	100.00	.	.	.	.	.	.	.	.	.	.	.	.	.	.	.	.	.	.	.	.	.	.	.	.	82.51	.	.	99.88	.	.	.	.	.	.	.	.	.
GCA_008985945.1_ASM898594v1	3	.	.	.	.	.	.	.	.	.	.	.	.	.	.	.	.	.	.	.	.	.	.	.	.	.	.	.	.	.	.	.	.	.	.	.	.	.	.	.	.	.	.	.	.	.	.	.	.
GCA_008986405.1_ASM898640v1	3	.	.	.	.	.	.	.	.	.	.	.	.	.	.	.	.	.	.	.	.	.	.	.	.	.	.	.	.	.	.	.	.	.	.	.	.	.	.	.	.	.	.	.	.	.	.	.	.
GCA_008986865.1_ASM898686v1	3	.	.	.	.	.	.	.	.	.	.	.	.	.	.	.	.	.	.	.	.	.	.	.	.	.	.	.	.	.	.	.	.	.	.	.	.	.	.	.	.	.	.	.	.	.	.	.	.
GCA_008986945.1_ASM898694v1	2	.	.	.	.	.	.	.	.	.	.	.	.	.	.	.	.	.	.	.	.	.	.	.	.	.	.	.	.	.	.	.	.	.	.	.	.	.	.	.	.	.	.	.	.	.	.	.	.
GCA_008986965.1_ASM898696v1	3	.	.	.	.	.	.	.	.	.	.	.	.	.	.	.	.	.	.	.	.	.	.	.	.	.	.	.	.	.	.	.	.	.	.	.	.	.	.	.	.	.	.	.	.	.	.	.	.
GCA_008987025.1_ASM898702v1	5	.	.	.	.	.	.	.	.	.	.	.	.	.	.	.	.	.	.	.	.	.	.	.	.	.	.	.	.	.	.	.	.	.	.	.	.	.	.	99.88	.	.	.	.	.	.	.	.	.
GCA_008987045.1_ASM898704v1	8	.	.	.	.	.	.	.	.	.	.	.	.	.	.	.	.	.	.	.	.	.	.	.	.	.	.	.	.	.	.	.	.	.	.	.	.	.	.	99.88	.	.	.	.	.	.	.	.	100.00
GCA_008987065.1_ASM898706v1	7	.	.	.	.	.	.	.	.	.	.	.	.	.	.	.	.	.	.	.	.	.	.	.	.	.	.	.	.	.	.	.	.	.	.	.	.	.	.	99.88	.	.	.	.	.	.	.	.	.
GCA_008987085.1_ASM898708v1	3	.	.	.	.	.	.	.	.	.	.	.	.	.	.	.	.	.	.	.	.	.	.	.	.	.	.	.	.	.	.	.	.	.	.	.	.	.	.	.	.	.	.	.	.	.	.	.	.
GCA_008987245.1_ASM898724v1	3	.	.	.	.	.	.	.	.	.	.	.	.	.	.	.	.	.	.	.	.	.	.	.	.	.	.	.	.	.	.	.	.	.	.	.	.	.	.	.	.	.	.	.	.	.	.	.	.
GCA_008987485.1_ASM898748v1	3	.	.	.	.	.	.	.	.	.	.	.	.	.	.	.	.	.	.	.	.	.	.	.	.	.	.	.	.	.	.	.	.	.	.	.	.	.	.	.	.	.	.	.	.	.	.	.	.
GCA_008987605.1_ASM898760v1	3	.	.	.	.	.	.	.	.	.	.	.	.	.	.	.	.	.	.	.	.	.	.	.	.	.	.	.	.	.	.	.	.	.	.	.	.	.	.	.	.	.	.	.	.	.	.	.	.
GCA_008987725.1_ASM898772v1	3	.	.	.	.	.	.	.	.	.	.	.	.	.	.	.	.	.	.	.	.	.	.	.	.	.	.	.	.	.	.	.	.	.	.	.	.	.	.	.	.	.	.	.	.	.	.	.	.
GCA_008988105.1_ASM898810v1	3	.	.	.	.	.	.	.	.	.	.	.	.	.	.	.	.	.	.	.	.	.	.	.	.	.	.	.	.	.	.	.	.	.	.	.	.	.	.	.	.	.	.	.	.	.	.	.	.
GCA_008988225.1_ASM898822v1	3	.	.	.	.	.	.	.	.	.	.	.	.	.	.	.	.	.	.	.	.	.	.	.	.	.	.	.	.	.	.	.	.	.	.	.	.	.	.	.	.	.	.	.	.	.	.	.	.
GCA_008988265.1_ASM898826v1	3	.	.	.	.	.	.	.	.	.	.	.	.	.	.	.	.	.	.	.	.	.	.	.	.	.	.	.	.	.	.	.	.	.	.	.	.	.	.	.	.	.	.	.	.	.	.	.	.
GCA_008988465.1_ASM898846v1	3	.	.	.	.	.	.	.	.	.	.	.	.	.	.	.	.	.	.	.	.	.	.	.	.	.	.	.	.	.	.	.	.	.	.	.	.	.	.	.	.	.	.	.	.	.	.	.	.
GCA_008988665.1_ASM898866v1	7	.	.	.	.	.	.	.	.	.	.	.	.	.	.	.	.	.	.	.	.	.	.	.	.	.	.	.	.	.	.	.	.	.	.	.	.	.	.	99.88	.	.	.	.	.	.	.	.	.
GCA_008988685.1_ASM898868v1	3	.	.	.	.	.	.	.	.	.	.	.	.	.	.	.	.	.	.	.	.	.	.	.	.	.	.	.	.	.	.	.	.	.	.	.	.	.	.	.	.	.	.	.	.	.	.	.	.
GCA_008988785.1_ASM898878v1	3	.	.	.	.	.	.	.	.	.	.	.	.	.	.	.	.	.	.	.	.	.	.	.	.	.	.	.	.	.	.	.	.	.	.	.	.	.	.	.	.	.	.	.	.	.	.	.	.
GCA_008988805.1_ASM898880v1	7	.	.	.	.	.	.	.	.	.	.	.	.	.	.	.	.	.	.	.	.	.	.	.	.	.	.	.	.	.	.	.	.	.	.	.	.	.	.	99.88	.	.	.	.	.	.	.	.	.
GCA_008988825.1_ASM898882v1	3	.	.	.	.	.	.	.	.	.	.	.	.	.	.	.	.	.	.	.	.	.	.	.	.	.	.	.	.	.	.	.	.	.	.	.	.	.	.	.	.	.	.	.	.	.	.	.	.
GCA_008988845.1_ASM898884v1	3	.	.	.	.	.	.	.	.	.	.	.	.	.	.	.	.	.	.	.	.	.	.	.	.	.	.	.	.	.	.	.	.	.	.	.	.	.	.	.	.	.	.	.	.	.	.	.	.
GCA_008988965.1_ASM898896v1	6	.	.	.	.	.	.	.	.	.	.	.	.	.	.	.	.	.	.	.	.	.	.	.	.	.	.	.	.	.	.	.	.	.	.	.	.	.	.	99.88	.	.	.	.	.	.	.	.	.
GCA_008989165.1_ASM898916v1	3	.	.	.	.	.	.	.	.	.	.	.	.	.	.	.	.	.	.	.	.	.	.	.	.	.	.	.	.	.	.	.	.	.	.	.	.	.	.	.	.	.	.	.	.	.	.	.	.
GCA_008989245.1_ASM898924v1	3	.	.	.	.	.	.	.	.	.	.	.	.	.	.	.	.	.	.	.	.	.	.	.	.	.	.	.	.	.	.	.	.	.	.	.	.	.	.	.	.	.	.	.	.	.	.	.	.
GCA_008989325.1_ASM898932v1	3	.	.	.	.	.	.	.	.	.	.	.	.	.	.	.	.	.	.	.	.	.	.	.	.	.	.	.	.	.	.	.	.	.	.	.	.	.	.	.	.	.	.	.	.	.	.	.	.
GCA_008989665.1_ASM898966v1	3	.	.	.	.	.	.	.	.	.	.	.	.	.	.	.	.	.	.	.	.	.	.	.	.	.	.	.	.	.	.	.	.	.	.	.	.	.	.	.	.	.	.	.	.	.	.	.	.
GCA_008989805.1_ASM898980v1	3	.	.	.	.	.	.	.	.	.	.	.	.	.	.	.	.	.	.	.	.	.	.	.	.	.	.	.	.	.	.	.	.	.	.	.	.	.	.	.	.	.	.	.	.	.	.	.	.
GCA_008989925.1_ASM898992v1	3	.	.	.	.	.	.	.	.	.	.	.	.	.	.	.	.	.	.	.	.	.	.	.	.	.	.	.	.	.	.	.	.	.	.	.	.	.	.	.	.	.	.	.	.	.	.	.	.
GCA_008990245.1_ASM899024v1	3	.	.	.	.	.	.	.	.	.	.	.	.	.	.	.	.	.	.	.	.	.	.	.	.	.	.	.	.	.	.	.	.	.	.	.	.	.	.	.	.	.	.	.	.	.	.	.	.
GCA_008990745.1_ASM899074v1	3	.	.	.	.	.	.	.	.	.	.	.	.	.	.	.	.	.	.	.	.	.	.	.	.	.	.	.	.	.	.	.	.	.	.	.	.	.	.	.	.	.	.	.	.	.	.	.	.
GCA_008990805.1_ASM899080v1	3	.	.	.	.	.	.	.	.	.	.	.	.	.	.	.	.	.	.	.	.	.	.	.	.	.	.	.	.	.	.	.	.	.	.	.	.	.	.	.	.	.	.	.	.	.	.	.	.
GCA_008990945.1_ASM899094v1	3	.	.	.	.	.	.	.	.	.	.	.	.	.	.	.	.	.	.	.	.	.	.	.	.	.	.	.	.	.	.	.	.	.	.	.	.	.	.	.	.	.	.	.	.	.	.	.	.
GCA_008991365.1_ASM899136v1	3	.	.	.	.	.	.	.	.	.	.	.	.	.	.	.	.	.	.	.	.	.	.	.	.	.	.	.	.	.	.	.	.	.	.	.	.	.	.	.	.	.	.	.	.	.	.	.	.
GCA_008991545.1_ASM899154v1	3	.	.	.	.	.	.	.	.	.	.	.	.	.	.	.	.	.	.	.	.	.	.	.	.	.	.	.	.	.	.	.	.	.	.	.	.	.	.	.	.	.	.	.	.	.	.	.	.
GCA_008991665.1_ASM899166v1	3	.	.	.	.	.	.	.	.	.	.	.	.	.	.	.	.	.	.	.	.	.	.	.	.	.	.	.	.	.	.	.	.	.	.	.	.	.	.	.	.	.	.	.	.	.	.	.	.
GCA_008991985.1_ASM899198v1	3	.	.	.	.	.	.	.	.	.	.	.	.	.	.	.	.	.	.	.	.	.	.	.	.	.	.	.	.	.	.	.	.	.	.	.	.	.	.	.	.	.	.	.	.	.	.	.	.
GCA_008992085.1_ASM899208v1	3	.	.	.	.	.	.	.	.	.	.	.	.	.	.	.	.	.	.	.	.	.	.	.	.	.	.	.	.	.	.	.	.	.	.	.	.	.	.	.	.	.	.	.	.	.	.	.	.
GCA_008992185.1_ASM899218v1	3	.	.	.	.	.	.	.	.	.	.	.	.	.	.	.	.	.	.	.	.	.	.	.	.	.	.	.	.	.	.	.	.	.	.	.	.	.	.	.	.	.	.	.	.	.	.	.	.
GCA_008992285.1_ASM899228v1	3	.	.	.	.	.	.	.	.	.	.	.	.	.	.	.	.	.	.	.	.	.	.	.	.	.	.	.	.	.	.	.	.	.	.	.	.	.	.	.	.	.	.	.	.	.	.	.	.
GCA_008992695.1_ASM899269v1	3	.	.	.	.	.	.	.	.	.	.	.	.	.	.	.	.	.	.	.	.	.	.	.	.	.	.	.	.	.	.	.	.	.	.	.	.	.	.	.	.	.	.	.	.	.	.	.	.
GCA_008992795.1_ASM899279v1	3	.	.	.	.	.	.	.	.	.	.	.	.	.	.	.	.	.	.	.	.	.	.	.	.	.	.	.	.	.	.	.	.	.	.	.	.	.	.	.	.	.	.	.	.	.	.	.	.
GCA_008992905.1_ASM899290v1	3	.	.	.	.	.	.	.	.	.	.	.	.	.	.	.	.	.	.	.	.	.	.	.	.	.	.	.	.	.	.	.	.	.	.	.	.	.	.	.	.	.	.	.	.	.	.	.	.
GCA_008993055.1_ASM899305v1	7	.	.	.	.	.	.	.	.	.	.	.	.	.	.	.	.	.	.	.	.	.	.	.	.	.	.	.	.	.	.	.	.	.	.	.	.	.	.	99.88	.	.	.	.	.	.	.	.	.
GCA_008993295.1_ASM899329v1	3	.	.	.	.	.	.	.	.	.	.	.	.	.	.	.	.	.	.	.	.	.	.	.	.	.	.	.	.	.	.	.	.	.	.	.	.	.	.	.	.	.	.	.	.	.	.	.	.
GCA_008993535.1_ASM899353v1	3	.	.	.	.	.	.	.	.	.	.	.	.	.	.	.	.	.	.	.	.	.	.	.	.	.	.	.	.	.	.	.	.	.	.	.	.	.	.	.	.	.	.	.	.	.	.	.	.
GCA_008994075.1_ASM899407v1	3	.	.	.	.	.	.	.	.	.	.	.	.	.	.	.	.	.	.	.	.	.	.	.	.	.	.	.	.	.	.	.	.	.	.	.	.	.	.	.	.	.	.	.	.	.	.	.	.
GCA_008994695.1_ASM899469v1	3	.	.	.	.	.	.	.	.	.	.	.	.	.	.	.	.	.	.	.	.	.	.	.	.	.	.	.	.	.	.	.	.	.	.	.	.	.	.	.	.	.	.	.	.	.	.	.	.
GCA_008994815.1_ASM899481v1	3	.	.	.	.	.	.	.	.	.	.	.	.	.	.	.	.	.	.	.	.	.	.	.	.	.	.	.	.	.	.	.	.	.	.	.	.	.	.	.	.	.	.	.	.	.	.	.	.
GCA_008995055.1_ASM899505v1	3	.	.	.	.	.	.	.	.	.	.	.	.	.	.	.	.	.	.	.	.	.	.	.	.	.	.	.	.	.	.	.	.	.	.	.	.	.	.	.	.	.	.	.	.	.	.	.	.
GCA_008995125.1_ASM899512v1	3	.	.	.	.	.	.	.	.	.	.	.	.	.	.	.	.	.	.	.	.	.	.	.	.	.	.	.	.	.	.	.	.	.	.	.	.	.	.	.	.	.	.	.	.	.	.	.	.
GCA_008995235.1_ASM899523v1	3	.	.	.	.	.	.	.	.	.	.	.	.	.	.	.	.	.	.	.	.	.	.	.	.	.	.	.	.	.	.	.	.	.	.	.	.	.	.	.	.	.	.	.	.	.	.	.	.
GCA_008995335.1_ASM899533v1	3	.	.	.	.	.	.	.	.	.	.	.	.	.	.	.	.	.	.	.	.	.	.	.	.	.	.	.	.	.	.	.	.	.	.	.	.	.	.	.	.	.	.	.	.	.	.	.	.
GCA_008995515.1_ASM899551v1	3	.	.	.	.	.	.	.	.	.	.	.	.	.	.	.	.	.	.	.	.	.	.	.	.	.	.	.	.	.	.	.	.	.	.	.	.	.	.	.	.	.	.	.	.	.	.	.	.
GCA_008995875.1_ASM899587v1	3	.	.	.	.	.	.	.	.	.	.	.	.	.	.	.	.	.	.	.	.	.	.	.	.	.	.	.	.	.	.	.	.	.	.	.	.	.	.	.	.	.	.	.	.	.	.	.	.
GCA_008995895.1_ASM899589v1	3	.	.	.	.	.	.	.	.	.	.	.	.	.	.	.	.	.	.	.	.	.	.	.	.	.	.	.	.	.	.	.	.	.	.	.	.	.	.	.	.	.	.	.	.	.	.	.	.
GCA_008995915.1_ASM899591v1	9	.	.	.	.	.	.	.	.	.	.	.	.	.	.	.	.	.	.	.	.	.	.	.	.	.	.	.	.	.	.	.	.	.	.	.	.	.	.	99.88	.	.	.	.	.	.	.	.	100.00
GCA_008995955.1_ASM899595v1	3	.	.	.	.	.	.	.	.	.	.	.	.	.	.	.	.	.	.	.	.	.	.	.	.	.	.	.	.	.	.	.	.	.	.	.	.	.	.	.	.	.	.	.	.	.	.	.	.
GCA_008995975.1_ASM899597v1	3	.	.	.	.	.	.	.	.	.	.	.	.	.	.	.	.	.	.	.	.	.	.	.	.	.	.	.	.	.	.	.	.	.	.	.	.	.	.	.	.	.	.	.	.	.	.	.	.
GCA_008995995.1_ASM899599v1	5	.	.	.	.	.	.	.	.	.	.	.	.	.	.	.	.	.	.	.	.	.	.	.	.	.	.	.	.	.	.	.	.	.	.	.	.	.	.	.	.	.	.	.	.	.	.	.	.
GCA_008996035.1_ASM899603v1	3	.	.	.	.	.	.	.	.	.	.	.	.	.	.	.	.	.	.	.	.	.	.	.	.	.	.	.	.	.	.	.	.	.	.	.	.	.	.	.	.	.	.	.	.	.	.	.	.
GCA_008996055.1_ASM899605v1	3	.	.	.	.	.	.	.	.	.	.	.	.	.	.	.	.	.	.	.	.	.	.	.	.	.	.	.	.	.	.	.	.	.	.	.	.	.	.	.	.	.	.	.	.	.	.	.	.
GCA_008996075.1_ASM899607v1	3	.	.	.	.	.	.	.	.	.	.	.	.	.	.	.	.	.	.	.	.	.	.	.	.	.	.	.	.	.	.	.	.	.	.	.	.	.	.	.	.	.	.	.	.	.	.	.	.
GCA_008996095.1_ASM899609v1	3	.	.	.	.	.	.	.	.	.	.	.	.	.	.	.	.	.	.	.	.	.	.	.	.	.	.	.	.	.	.	.	.	.	.	.	.	.	.	.	.	.	.	.	.	.	.	.	.
GCA_008996955.1_ASM899695v1	3	.	.	.	.	.	.	.	.	.	.	.	.	.	.	.	.	.	.	.	.	.	.	.	.	.	.	.	.	.	.	.	.	.	.	.	.	.	.	.	.	.	.	.	.	.	.	.	.
GCA_008997465.1_ASM899746v1	13	.	.	.	.	.	.	.	.	.	.	.	.	.	.	.	.	.	.	.	.	.	.	.	.	.	.	.	.	.	.	.	.	.	.	.	82.51	.	.	99.88	.	.	.	.	.	.	.	.	.
GCA_008997955.1_ASM899795v1	3	.	.	.	.	.	.	.	.	.	.	.	.	.	.	.	.	.	.	.	.	.	.	.	.	.	.	.	.	.	.	.	.	.	.	.	.	.	.	.	.	.	.	.	.	.	.	.	.
GCA_008998215.1_ASM899821v1	3	.	.	.	.	.	.	.	.	.	.	.	.	.	.	.	.	.	.	.	.	.	.	.	.	.	.	.	.	.	.	.	.	.	.	.	.	.	.	.	.	.	.	.	.	.	.	.	.
GCA_008998435.1_ASM899843v1	3	.	.	.	.	.	.	.	.	.	.	.	.	.	.	.	.	.	.	.	.	.	.	.	.	.	.	.	.	.	.	.	.	.	.	.	.	.	.	.	.	.	.	.	.	.	.	.	.
GCA_008998555.1_ASM899855v1	3	.	.	.	.	.	.	.	.	.	.	.	.	.	.	.	.	.	.	.	.	.	.	.	.	.	.	.	.	.	.	.	.	.	.	.	.	.	.	.	.	.	.	.	.	.	.	.	.
GCA_008998795.1_ASM899879v1	3	.	.	.	.	.	.	.	.	.	.	.	.	.	.	.	.	.	.	.	.	.	.	.	.	.	.	.	.	.	.	.	.	.	.	.	.	.	.	.	.	.	.	.	.	.	.	.	.
GCA_008999165.1_ASM899916v1	3	.	.	.	.	.	.	.	.	.	.	.	.	.	.	.	.	.	.	.	.	.	.	.	.	.	.	.	.	.	.	.	.	.	.	.	.	.	.	.	.	.	.	.	.	.	.	.	.
GCA_008999275.1_ASM899927v1	3	.	.	.	.	.	.	.	.	.	.	.	.	.	.	.	.	.	.	.	.	.	.	.	.	.	.	.	.	.	.	.	.	.	.	.	.	.	.	.	.	.	.	.	.	.	.	.	.
GCA_008999515.1_ASM899951v1	3	.	.	.	.	.	.	.	.	.	.	.	.	.	.	.	.	.	.	.	.	.	.	.	.	.	.	.	.	.	.	.	.	.	.	.	.	.	.	.	.	.	.	.	.	.	.	.	.
GCA_008999635.1_ASM899963v1	3	.	.	.	.	.	.	.	.	.	.	.	.	.	.	.	.	.	.	.	.	.	.	.	.	.	.	.	.	.	.	.	.	.	.	.	.	.	.	.	.	.	.	.	.	.	.	.	.
GCA_008999695.1_ASM899969v1	3	.	.	.	.	.	.	.	.	.	.	.	.	.	.	.	.	.	.	.	.	.	.	.	.	.	.	.	.	.	.	.	.	.	.	.	.	.	.	.	.	.	.	.	.	.	.	.	.
GCA_008999715.1_ASM899971v1	3	.	.	.	.	.	.	.	.	.	.	.	.	.	.	.	.	.	.	.	.	.	.	.	.	.	.	.	.	.	.	.	.	.	.	.	.	.	.	.	.	.	.	.	.	.	.	.	.
GCA_008999955.1_ASM899995v1	3	.	.	.	.	.	.	.	.	.	.	.	.	.	.	.	.	.	.	.	.	.	.	.	.	.	.	.	.	.	.	.	.	.	.	.	.	.	.	.	.	.	.	.	.	.	.	.	.
GCA_009000435.1_ASM900043v1	3	.	.	.	.	.	.	.	.	.	.	.	.	.	.	.	.	.	.	.	.	.	.	.	.	.	.	.	.	.	.	.	.	.	.	.	.	.	.	.	.	.	.	.	.	.	.	.	.
GCA_009000495.1_ASM900049v1	3	.	.	.	.	.	.	.	.	.	.	.	.	.	.	.	.	.	.	.	.	.	.	.	.	.	.	.	.	.	.	.	.	.	.	.	.	.	.	.	.	.	.	.	.	.	.	.	.
GCA_009000555.1_ASM900055v1	3	.	.	.	.	.	.	.	.	.	.	.	.	.	.	.	.	.	.	.	.	.	.	.	.	.	.	.	.	.	.	.	.	.	.	.	.	.	.	.	.	.	.	.	.	.	.	.	.
GCA_009000575.1_ASM900057v1	3	.	.	.	.	.	.	.	.	.	.	.	.	.	.	.	.	.	.	.	.	.	.	.	.	.	.	.	.	.	.	.	.	.	.	.	.	.	.	.	.	.	.	.	.	.	.	.	.
GCA_009000655.1_ASM900065v1	3	.	.	.	.	.	.	.	.	.	.	.	.	.	.	.	.	.	.	.	.	.	.	.	.	.	.	.	.	.	.	.	.	.	.	.	.	.	.	.	.	.	.	.	.	.	.	.	.
GCA_009000755.1_ASM900075v1	2	.	.	.	.	.	.	.	.	.	.	.	.	.	.	.	.	.	.	.	.	.	.	.	.	.	.	.	.	.	.	.	.	.	.	.	.	.	.	.	.	.	.	.	.	.	.	.	.
GCA_009001075.1_ASM900107v1	2	.	.	.	.	.	.	.	.	.	.	.	.	.	.	.	.	.	.	.	.	.	.	.	.	.	.	.	.	.	.	.	.	.	.	.	.	.	.	.	.	.	.	.	.	.	.	.	.
GCA_009001915.1_ASM900191v1	3	.	.	.	.	.	.	.	.	.	.	.	.	.	.	.	.	.	.	.	.	.	.	.	.	.	.	.	.	.	.	.	.	.	.	.	.	.	.	.	.	.	.	.	.	.	.	.	.
GCA_009002035.1_ASM900203v1	2	.	.	.	.	.	.	.	.	.	.	.	.	.	.	.	.	.	.	.	.	.	.	.	.	.	.	.	.	.	.	.	.	.	.	.	.	.	.	.	.	.	.	.	.	.	.	.	.
GCA_009002255.1_ASM900225v1	3	.	.	.	.	.	.	.	.	.	.	.	.	.	.	.	.	.	.	.	.	.	.	.	.	.	.	.	.	.	.	.	.	.	.	.	.	.	.	.	.	.	.	.	.	.	.	.	.
GCA_009003295.1_ASM900329v1	3	.	.	.	.	.	.	.	.	.	.	.	.	.	.	.	.	.	.	.	.	.	.	.	.	.	.	.	.	.	.	.	.	.	.	.	.	.	.	.	.	.	.	.	.	.	.	.	.
GCA_009004355.1_ASM900435v1	3	.	.	.	.	.	.	.	.	.	.	.	.	.	.	.	.	.	.	.	.	.	.	.	.	.	.	.	.	.	.	.	.	.	.	.	.	.	.	.	.	.	.	.	.	.	.	.	.
GCA_009004455.1_ASM900445v1	3	.	.	.	.	.	.	.	.	.	.	.	.	.	.	.	.	.	.	.	.	.	.	.	.	.	.	.	.	.	.	.	.	.	.	.	.	.	.	.	.	.	.	.	.	.	.	.	.
GCA_009005095.1_ASM900509v1	3	.	.	.	.	.	.	.	.	.	.	.	.	.	.	.	.	.	.	.	.	.	.	.	.	.	.	.	.	.	.	.	.	.	.	.	.	.	.	.	.	.	.	.	.	.	.	.	.
GCA_009005205.1_ASM900520v1	3	.	.	.	.	.	.	.	.	.	.	.	.	.	.	.	.	.	.	.	.	.	.	.	.	.	.	.	.	.	.	.	.	.	.	.	.	.	.	.	.	.	.	.	.	.	.	.	.
GCA_009005395.1_ASM900539v1	3	.	.	.	.	.	.	.	.	.	.	.	.	.	.	.	.	.	.	.	.	.	.	.	.	.	.	.	.	.	.	.	.	.	.	.	.	.	.	.	.	.	.	.	.	.	.	.	.
GCA_009006055.1_ASM900605v1	3	.	.	.	.	.	.	.	.	.	.	.	.	.	.	.	.	.	.	.	.	.	.	.	.	.	.	.	.	.	.	.	.	.	.	.	.	.	.	.	.	.	.	.	.	.	.	.	.
GCA_009006115.1_ASM900611v1	3	.	.	.	.	.	.	.	.	.	.	.	.	.	.	.	.	.	.	.	.	.	.	.	.	.	.	.	.	.	.	.	.	.	.	.	.	.	.	.	.	.	.	.	.	.	.	.	.
GCA_009006475.1_ASM900647v1	3	.	.	.	.	.	.	.	.	.	.	.	.	.	.	.	.	.	.	.	.	.	.	.	.	.	.	.	.	.	.	.	.	.	.	.	.	.	.	.	.	.	.	.	.	.	.	.	.
GCA_009006655.1_ASM900665v1	3	.	.	.	.	.	.	.	.	.	.	.	.	.	.	.	.	.	.	.	.	.	.	.	.	.	.	.	.	.	.	.	.	.	.	.	.	.	.	.	.	.	.	.	.	.	.	.	.
GCA_009007095.1_ASM900709v1	3	.	.	.	.	.	.	.	.	.	.	.	.	.	.	.	.	.	.	.	.	.	.	.	.	.	.	.	.	.	.	.	.	.	.	.	.	.	.	.	.	.	.	.	.	.	.	.	.
GCA_009008375.1_ASM900837v1	15	.	.	.	.	.	.	.	100.00	.	.	.	.	.	.	.	100.00	.	.	.	.	.	.	.	.	.	.	.	.	.	.	.	.	.	.	.	.	.	.	99.88	.	.	.	.	.	.	.	.	100.00
GCA_009008455.1_ASM900845v1	15	.	.	.	.	.	.	.	100.00	.	.	.	.	.	.	.	100.00	.	.	.	.	.	.	.	.	.	.	.	.	.	.	.	.	.	.	.	.	.	.	99.88	.	.	.	.	.	.	.	.	100.00
GCA_009008595.1_ASM900859v1	3	.	.	.	.	.	.	.	.	.	.	.	.	.	.	.	.	.	.	.	100.00	.	.	.	.	.	.	.	.	.	.	.	.	.	.	.	.	.	.	.	.	.	.	.	.	.	.	.	.
GCA_009008875.1_ASM900887v1	14	.	.	.	.	.	.	.	100.00	.	.	.	.	.	.	.	100.00	.	.	.	.	.	.	.	.	.	.	.	.	.	.	.	.	.	.	.	.	.	.	99.88	.	.	.	.	.	.	.	.	100.00
GCA_009008995.1_ASM900899v1	14	.	.	.	.	.	.	.	100.00	.	.	.	.	.	.	.	100.00	.	.	.	.	.	.	.	.	.	.	.	.	.	.	.	.	.	.	.	.	.	.	99.88	.	.	.	.	.	.	.	.	100.00
GCA_009009115.1_ASM900911v1	3	.	.	.	.	.	.	.	.	.	.	.	.	.	.	.	.	.	.	.	.	.	.	.	.	.	.	.	.	.	.	.	.	.	.	.	.	.	.	.	.	.	.	.	.	.	.	.	.
GCA_009009235.1_ASM900923v1	15	.	.	.	.	.	.	.	100.00	.	.	.	.	.	.	.	100.00	.	.	.	.	.	.	.	.	.	.	.	.	.	.	.	.	.	.	.	.	.	.	99.88	.	.	.	.	.	.	.	.	100.00
GCA_009009435.1_ASM900943v1	15	.	.	.	.	.	.	.	100.00	.	.	.	.	.	.	.	100.00	.	.	.	.	.	.	.	.	.	.	.	.	.	.	.	.	.	.	.	.	.	.	99.88	.	.	.	.	.	.	.	.	100.00
GCA_009009555.1_ASM900955v1	3	.	.	.	.	.	.	.	.	.	.	.	.	.	.	.	.	.	.	.	.	.	.	.	.	.	.	.	.	.	.	.	.	.	.	.	.	.	.	.	.	.	.	.	.	.	.	.	.
GCA_009009675.1_ASM900967v1	14	.	.	.	.	.	.	.	100.00	.	.	.	.	.	.	.	100.00	.	.	.	.	.	.	.	.	.	.	.	.	.	.	.	.	.	.	.	.	.	.	99.88	.	.	.	.	.	.	.	.	100.00
GCA_009010035.1_ASM901003v1	15	.	.	.	.	.	.	.	100.00	.	.	.	.	.	.	.	100.00	.	.	.	.	.	.	.	.	.	.	.	.	.	.	.	.	.	.	.	.	.	.	99.88	.	.	.	.	.	.	.	.	100.00
GCA_009010135.1_ASM901013v1	15	.	.	.	.	.	.	.	100.00	.	.	.	.	.	.	.	100.00	.	.	.	.	.	.	.	.	.	.	.	.	.	.	.	.	.	.	.	.	.	.	99.88	.	.	.	.	.	.	.	.	100.00
GCA_009010395.1_ASM901039v1	3	.	.	.	.	.	.	.	.	.	.	.	.	.	.	.	.	.	.	.	.	.	.	.	.	.	.	.	.	.	.	.	.	.	.	.	.	.	.	.	.	.	.	.	.	.	.	.	.
GCA_009010815.1_ASM901081v1	3	.	.	.	.	.	.	.	.	.	.	.	.	.	.	.	.	.	.	.	.	.	.	.	.	.	.	.	.	.	.	.	.	.	.	.	.	.	.	.	.	.	.	.	.	.	.	.	.
GCA_009012995.1_ASM901299v1	3	.	.	.	.	.	.	.	.	.	.	.	.	.	.	.	.	.	.	.	.	.	.	.	.	.	.	.	.	.	.	.	.	.	.	.	.	.	.	.	.	.	.	.	.	.	.	.	.
GCA_009013035.1_ASM901303v1	2	.	.	.	.	.	.	.	.	.	.	.	.	.	.	.	.	.	.	.	.	.	.	.	.	.	.	.	.	.	.	.	.	.	.	.	.	.	.	.	.	.	.	.	.	.	.	.	.
GCA_009013075.1_ASM901307v1	3	.	.	.	.	.	.	.	.	.	.	.	.	.	.	.	.	.	.	.	.	.	.	.	.	.	.	.	.	.	.	.	.	.	.	.	.	.	.	.	.	.	.	.	.	.	.	.	.
GCA_009013095.1_ASM901309v1	3	.	.	.	.	.	.	.	.	.	.	.	.	.	.	.	.	.	.	.	.	.	.	.	.	.	.	.	.	.	.	.	.	.	.	.	.	.	.	.	.	.	.	.	.	.	.	.	.
GCA_009013135.1_ASM901313v1	3	.	.	.	.	.	.	.	.	.	.	.	.	.	.	.	.	.	.	.	.	.	.	.	.	.	.	.	.	.	.	.	.	.	.	.	.	.	.	.	.	.	.	.	.	.	.	.	.
GCA_009013355.1_ASM901335v1	3	.	.	.	.	.	.	.	.	.	.	.	.	.	.	.	.	.	.	.	.	.	.	.	.	.	.	.	.	.	.	.	.	.	.	.	.	.	.	.	.	.	.	.	.	.	.	.	.
GCA_009013475.1_ASM901347v1	3	.	.	.	.	.	.	.	.	.	.	.	.	.	.	.	.	.	.	.	.	.	.	.	.	.	.	.	.	.	.	.	.	.	.	.	.	.	.	.	.	.	.	.	.	.	.	.	.
GCA_009013495.1_ASM901349v1	3	.	.	.	.	.	.	.	.	.	.	.	.	.	.	.	.	.	.	.	.	.	.	.	.	.	.	.	.	.	.	.	.	.	.	.	.	.	.	.	.	.	.	.	.	.	.	.	.
GCA_009013575.1_ASM901357v1	2	.	.	.	.	.	.	.	.	.	.	.	.	.	.	.	.	.	.	.	.	.	.	.	.	.	.	.	.	.	.	.	.	.	.	.	.	.	.	.	.	.	.	.	.	.	.	.	.
GCA_009013615.1_ASM901361v1	3	.	.	.	.	.	.	.	.	.	.	.	.	.	.	.	.	.	.	.	.	.	.	.	.	.	.	.	.	.	.	.	.	.	.	.	.	.	.	.	.	.	.	.	.	.	.	.	.
GCA_009013655.1_ASM901365v1	3	.	.	.	.	.	.	.	.	.	.	.	.	.	.	.	.	.	.	.	.	.	.	.	.	.	.	.	.	.	.	.	.	.	.	.	.	.	.	.	.	.	.	.	.	.	.	.	.
GCA_009013735.1_ASM901373v1	3	.	.	.	.	.	.	.	.	.	.	.	.	.	.	.	.	.	.	.	.	.	.	.	.	.	.	.	.	.	.	.	.	.	.	.	.	.	.	.	.	.	.	.	.	.	.	.	.
GCA_009013915.1_ASM901391v1	3	.	.	.	.	.	.	.	.	.	.	.	.	.	.	.	.	.	.	.	.	.	.	.	.	.	.	.	.	.	.	.	.	.	.	.	.	.	.	.	.	.	.	.	.	.	.	.	.
GCA_009014055.1_ASM901405v1	3	.	.	.	.	.	.	.	.	.	.	.	.	.	.	.	.	.	.	.	.	.	.	.	.	.	.	.	.	.	.	.	.	.	.	.	.	.	.	.	.	.	.	.	.	.	.	.	.
GCA_009014075.1_ASM901407v1	17	.	.	.	.	.	.	.	.	.	.	100.00	.	.	.	.	.	.	.	.	.	.	.	.	.	.	.	.	.	.	.	.	.	.	.	.	82.51	.	.	99.88	.	.	.	.	.	.	.	.	100.00
GCA_009014235.1_ASM901423v1	3	.	.	.	.	.	.	.	.	.	.	.	.	.	.	.	.	.	.	.	.	.	.	.	.	.	.	.	.	.	.	.	.	.	.	.	.	.	.	.	.	.	.	.	.	.	.	.	.
GCA_009014275.1_ASM901427v1	3	.	.	.	.	.	.	.	.	.	.	.	.	.	.	.	.	.	.	.	.	.	.	.	.	.	.	.	.	.	.	.	.	.	.	.	.	.	.	.	.	.	.	.	.	.	.	.	.
GCA_009014315.1_ASM901431v1	2	.	.	.	.	.	.	.	.	.	.	.	.	.	.	.	.	.	.	.	.	.	.	.	.	.	.	.	.	.	.	.	.	.	.	.	.	.	.	.	.	.	.	.	.	.	.	.	.
GCA_009014395.1_ASM901439v1	3	.	.	.	.	.	.	.	.	.	.	.	.	.	.	.	.	.	.	.	.	.	.	.	.	.	.	.	.	.	.	.	.	.	.	.	.	.	.	.	.	.	.	.	.	.	.	.	.
GCA_009014415.1_ASM901441v1	3	.	.	.	.	.	.	.	.	.	.	.	.	.	.	.	.	.	.	.	.	.	.	.	.	.	.	.	.	.	.	.	.	.	.	.	.	.	.	.	.	.	.	.	.	.	.	.	.
GCA_009014475.1_ASM901447v1	3	.	.	.	.	.	.	.	.	.	.	.	.	.	.	.	.	.	.	.	.	.	.	.	.	.	.	.	.	.	.	.	.	.	.	.	.	.	.	.	.	.	.	.	.	.	.	.	.
GCA_009014595.1_ASM901459v1	7	.	.	.	.	.	.	.	.	.	.	.	.	.	.	.	.	.	.	.	.	.	.	.	.	.	.	.	.	.	.	.	.	.	.	.	.	.	.	99.88	.	.	.	.	.	.	.	.	.
GCA_009014615.1_ASM901461v1	3	.	.	.	.	.	.	.	.	.	.	.	.	.	.	.	.	.	.	.	.	.	.	.	.	.	.	.	.	.	.	.	.	.	.	.	.	.	.	.	.	.	.	.	.	.	.	.	.
GCA_011398515.1_ASM1139851v1	4	.	.	.	.	.	.	.	.	.	.	.	.	.	.	.	.	.	.	.	.	.	.	.	.	.	.	.	.	.	.	.	.	.	.	.	.	.	.	.	.	.	.	.	.	.	.	.	.
GCA_013403085.1_ASM1340308v1	2	.	.	.	.	.	.	.	.	.	.	.	.	.	.	.	.	.	.	.	.	.	.	.	.	.	.	.	.	.	.	.	.	.	.	.	.	.	.	.	.	.	.	.	.	.	.	.	.
GCA_013403505.1_ASM1340350v1	13	.	.	.	.	.	.	.	.	.	.	100.00	.	.	.	.	.	.	.	.	.	.	.	.	.	.	.	.	.	.	.	.	.	.	.	.	82.51	.	.	.	.	.	.	.	.	.	.	.	100.00
GCA_013423345.1_ASM1342334v1	12	.	.	.	.	.	.	.	.	.	.	.	.	.	.	.	.	.	.	.	.	.	.	.	.	.	.	.	.	.	.	.	.	.	.	.	.	.	.	99.88	.	.	.	.	.	.	.	.	.
GCA_014334925.1_ASM1433492v1	11	.	.	.	.	.	.	.	.	.	100.00	.	.	.	.	.	.	.	.	.	.	.	.	.	.	.	.	.	.	.	.	.	.	.	.	.	.	.	.	.	.	.	.	.	.	.	.	.	.
GCA_014531425.1_ASM1453142v1	15	.	.	.	.	.	.	.	.	.	.	100.00	.	.	.	.	.	95.71	.	.	.	.	.	.	.	.	.	.	97.92	.	.	77.34	.	.	.	.	.	.	.	97.01	.	.	.	.	.	.	.	.	.
GCA_014705985.1_ASM1470598v1	5	.	.	.	.	.	.	.	.	.	.	.	.	.	.	.	.	.	.	.	.	.	.	.	.	.	.	.	.	.	.	.	.	.	.	.	.	.	.	.	.	.	.	.	.	.	.	.	.
GCA_014880105.1_ASM1488010v1	16	.	.	.	.	.	.	.	.	.	.	.	.	.	.	.	.	.	.	.	.	.	.	.	.	.	.	.	.	.	.	.	.	.	.	.	82.51	.	.	99.88	.	.	.	.	.	.	.	.	87.25
GCA_014880115.1_ASM1488011v1	9	.	.	.	.	.	.	.	.	.	.	.	.	.	.	.	.	.	.	.	.	.	.	.	.	.	.	.	97.92	.	.	100.00	.	.	.	.	.	.	.	.	.	.	.	.	.	.	.	.	.
GCA_014880165.1_ASM1488016v1	16	.	.	.	.	.	.	.	.	.	.	.	.	.	.	.	.	.	.	.	.	.	.	.	.	.	.	.	.	.	.	.	.	.	.	.	82.51	.	.	99.88	.	.	.	.	.	.	.	.	100.00
GCA_014880195.1_ASM1488019v1	8	.	.	.	.	.	.	.	.	.	.	.	.	.	.	.	.	.	.	.	.	.	.	.	.	.	.	.	97.92	.	.	100.00	.	.	.	.	.	.	.	.	.	.	.	.	.	.	.	.	.
GCA_014880205.1_ASM1488020v1	9	.	.	.	.	.	.	.	.	.	.	.	.	.	.	.	.	.	.	.	.	.	.	.	.	.	.	.	97.92	.	.	100.00	.	.	.	.	.	.	.	.	.	.	.	.	.	.	.	.	.
GCA_014880215.2_ASM1488021v2	10	.	.	.	.	.	.	.	.	.	.	.	.	.	.	100.00	.	.	.	.	.	.	.	.	.	.	.	.	.	.	.	.	.	.	.	.	.	.	.	99.88	.	.	.	.	.	.	.	.	.
GCA_014880235.1_ASM1488023v1	4	.	.	.	.	.	.	.	.	.	.	.	.	.	.	.	.	.	.	.	.	.	.	.	.	.	.	.	.	.	.	.	.	.	.	.	.	.	.	.	.	.	.	.	.	.	.	.	.
GCA_014880275.1_ASM1488027v1	7	.	.	.	.	.	.	.	.	.	.	.	.	.	.	.	.	.	.	.	.	.	.	.	.	.	.	.	.	.	.	.	.	.	.	.	.	.	.	99.88	.	.	.	.	.	.	.	.	.
GCA_014880285.1_ASM1488028v1	7	.	.	.	.	.	.	.	.	.	.	.	.	.	.	.	.	.	.	.	.	.	.	.	.	.	.	.	.	.	.	.	.	.	.	.	.	.	.	99.88	.	.	.	.	.	.	.	.	.
GCA_014880315.1_ASM1488031v1	3	.	.	.	.	.	.	.	.	.	.	.	.	.	.	.	.	.	.	.	.	.	.	.	.	.	.	.	.	.	.	.	.	.	.	.	.	.	.	.	.	.	.	.	.	.	.	.	.
GCA_014880325.1_ASM1488032v1	14	.	.	.	.	.	.	.	.	.	.	.	.	.	.	.	.	.	.	.	.	.	.	.	.	.	.	.	97.92	.	.	100.00	.	.	.	.	.	.	.	.	.	.	.	.	.	.	.	.	.
GCA_014880345.1_ASM1488034v1	4	.	.	.	.	.	.	.	.	.	.	.	.	.	.	.	.	.	.	.	.	.	.	.	.	.	.	.	.	.	.	.	.	.	.	.	.	.	.	.	.	.	.	.	.	.	.	.	.
GCA_014880365.1_ASM1488036v1	6	.	.	.	.	.	.	.	.	.	.	.	.	.	.	.	.	.	.	.	.	.	.	.	.	.	.	.	.	.	.	.	.	.	.	.	.	.	.	.	.	.	.	.	.	.	.	.	.
GCA_014880385.1_ASM1488038v1	16	.	.	.	.	.	.	.	.	.	.	.	.	.	.	.	.	.	.	.	.	.	.	.	.	.	.	.	.	.	.	.	.	.	.	.	82.51	.	.	99.88	.	.	.	.	.	.	.	.	87.25
GCA_014880415.1_ASM1488041v1	9	.	.	.	.	.	.	.	.	.	.	.	.	.	.	.	.	.	.	.	.	.	.	.	.	.	.	.	.	.	.	.	.	.	.	.	.	.	.	99.88	.	.	.	.	.	.	.	.	100.00
GCA_014880435.1_ASM1488043v1	9	.	.	.	.	.	.	.	.	.	.	.	.	.	.	.	.	.	.	.	.	.	.	.	.	.	.	.	97.92	.	.	100.00	.	.	.	.	.	.	.	.	.	.	.	.	.	.	.	.	.
GCA_014880445.1_ASM1488044v1	4	.	.	.	.	.	.	.	.	.	.	.	.	.	.	.	.	.	.	.	.	.	.	.	.	.	.	.	.	.	.	.	.	.	.	.	.	.	.	.	.	.	.	.	.	.	.	.	.
GCA_014880465.1_ASM1488046v1	8	.	.	.	.	.	.	.	.	.	.	.	.	.	.	.	.	.	.	.	.	.	.	.	.	.	.	.	97.92	.	.	100.00	.	.	.	.	.	.	.	.	.	.	.	.	.	.	.	.	.
GCA_014880475.1_ASM1488047v1	9	.	.	.	.	.	.	.	.	.	.	.	.	.	.	.	.	.	.	.	.	.	.	.	.	.	.	.	97.92	.	.	100.00	.	.	.	.	.	.	.	.	.	.	.	.	.	.	.	.	.
GCA_014880515.1_ASM1488051v1	7	.	.	.	.	.	.	.	.	.	.	.	.	.	.	.	.	.	.	.	.	.	.	.	.	.	.	.	.	.	.	.	.	.	.	.	.	.	.	99.88	.	.	.	.	.	.	.	.	.
GCA_014880525.1_ASM1488052v1	15	.	.	.	.	.	.	.	.	.	.	.	.	.	.	.	.	.	.	.	.	.	.	.	.	.	.	.	.	.	.	.	.	.	.	.	82.51	.	.	99.88	.	.	.	.	.	.	.	.	100.00
GCA_014880555.1_ASM1488055v1	2	.	.	.	.	.	.	.	.	.	.	.	.	.	.	.	.	.	.	.	.	.	.	.	.	.	.	.	.	.	.	.	.	.	.	.	.	.	.	.	.	.	.	.	.	.	.	.	.
GCA_014880565.1_ASM1488056v1	13	.	.	.	.	.	.	.	.	.	.	.	.	.	.	.	.	.	.	.	.	.	.	.	.	.	.	.	.	.	.	.	.	.	.	.	82.51	.	.	99.88	.	.	.	.	.	.	.	.	100.00
GCA_014880595.1_ASM1488059v1	17	.	.	.	.	.	.	.	.	.	.	89.51	.	.	100.00	.	.	.	.	.	.	.	.	.	.	.	.	.	.	.	100.00	.	.	.	.	.	.	.	.	99.88	.	.	.	.	.	.	.	.	.
GCA_014880605.1_ASM1488060v1	15	.	.	.	.	.	.	.	.	.	.	.	.	.	.	.	.	.	.	.	.	.	.	.	.	.	.	.	.	.	.	.	.	.	.	.	82.51	.	.	99.88	.	.	.	.	.	.	.	.	100.00
GCA_014880635.1_ASM1488063v1	8	.	.	.	.	.	.	.	.	.	.	100.00	.	.	.	.	.	.	.	.	.	.	.	.	.	.	.	.	.	.	.	.	.	.	.	.	82.51	.	.	.	.	.	.	.	.	.	.	.	.
GCA_014880655.1_ASM1488065v1	16	.	.	.	.	.	.	.	.	.	.	.	.	.	.	.	.	.	.	.	.	.	.	.	.	.	.	.	.	.	.	.	.	.	.	.	82.51	.	.	99.88	.	.	.	.	.	.	.	.	87.25
GCA_014880665.1_ASM1488066v1	9	.	.	.	.	.	.	.	.	.	.	.	.	.	.	.	.	.	.	.	.	.	.	.	.	.	.	.	.	.	.	.	.	.	.	.	.	.	.	99.88	.	.	.	.	.	.	.	.	100.00
GCA_014880675.1_ASM1488067v1	17	.	.	.	.	.	.	.	.	.	.	89.51	.	.	100.00	.	.	.	.	.	.	.	.	.	.	.	.	.	.	.	100.00	.	.	.	.	.	.	.	.	99.88	.	.	.	.	.	.	.	.	.
GCA_014880685.1_ASM1488068v1	9	.	.	.	.	.	.	.	.	.	.	.	.	.	.	.	.	.	.	.	.	.	.	.	.	.	.	.	97.92	.	.	100.00	.	.	.	.	.	.	.	.	.	.	.	.	.	.	.	.	.
GCA_014880735.1_ASM1488073v1	9	.	.	.	.	.	.	.	.	.	.	.	.	.	.	95.81	.	.	.	.	.	.	.	.	.	.	.	.	.	.	.	.	.	.	.	.	.	.	.	99.88	.	.	.	.	.	.	.	.	.
GCA_014880745.1_ASM1488074v1	8	.	.	.	.	.	.	.	.	.	.	.	.	.	.	.	.	.	.	.	.	.	.	.	.	.	.	.	.	.	.	.	.	.	.	.	.	.	.	.	.	.	.	.	.	.	.	.	.
GCA_014880755.1_ASM1488075v1	16	.	.	.	.	.	.	.	.	.	.	.	.	.	.	.	.	.	.	.	.	.	.	.	.	.	.	.	.	.	.	.	.	.	.	.	82.51	.	.	99.88	.	.	.	.	.	.	.	.	100.00
GCA_014880785.1_ASM1488078v1	9	.	.	.	.	.	.	.	.	.	.	.	.	.	.	.	.	.	.	.	.	.	.	.	.	.	.	.	97.92	.	.	100.00	.	.	.	.	.	.	.	.	.	.	.	.	.	.	.	.	.
GCA_014880815.1_ASM1488081v1	9	.	.	.	.	.	.	.	.	.	.	.	.	.	.	.	.	.	.	.	.	.	.	.	.	.	.	.	97.92	.	.	100.00	.	.	.	.	.	.	.	.	.	.	.	.	.	.	.	.	.
GCA_014880835.1_ASM1488083v1	9	.	.	.	.	.	.	.	.	.	.	.	.	.	.	.	.	.	.	.	.	.	.	.	.	.	.	.	97.92	.	.	100.00	.	.	.	.	.	.	.	.	.	.	.	.	.	.	.	.	.
GCA_014880845.1_ASM1488084v1	5	.	.	.	.	.	.	.	.	.	.	.	.	.	.	.	.	.	.	.	.	.	.	.	.	.	.	.	.	.	.	.	.	.	.	.	.	.	.	.	.	.	.	.	.	.	.	.	.
GCA_014880855.1_ASM1488085v1	5	.	.	.	.	.	.	.	.	.	.	.	.	.	.	.	.	.	.	.	.	.	.	.	.	.	.	.	.	.	.	.	.	.	.	.	.	.	.	.	.	.	.	.	.	.	.	.	.
GCA_014880865.1_ASM1488086v1	10	.	.	.	.	.	.	.	.	.	.	.	.	.	.	100.00	.	.	.	.	.	.	.	.	.	.	.	.	.	.	.	.	.	.	.	.	.	.	.	99.88	.	.	.	.	.	.	.	.	.
GCA_014880915.1_ASM1488091v1	8	.	.	.	.	.	.	.	.	.	.	.	.	.	.	.	.	.	.	.	.	.	.	.	.	.	.	.	97.92	.	.	100.00	.	.	.	.	.	.	.	.	.	.	.	.	.	.	.	.	.
GCA_014880935.1_ASM1488093v1	10	.	.	.	.	.	.	.	.	.	.	88.95	.	.	.	.	.	.	.	.	.	.	.	.	.	.	.	.	97.92	.	.	100.00	.	.	.	.	82.51	.	.	.	.	.	.	.	.	.	.	.	.
GCA_014880945.1_ASM1488094v1	8	.	.	.	.	.	.	.	.	.	.	.	.	.	.	.	.	.	.	.	.	.	.	.	.	.	.	.	.	.	.	.	.	.	.	.	.	.	.	99.88	.	.	.	.	.	.	.	.	.
GCA_014880955.1_ASM1488095v1	10	.	.	.	.	.	.	.	.	.	.	88.95	.	.	.	.	.	.	.	.	.	.	.	.	.	.	.	.	97.92	.	.	100.00	.	.	.	.	82.51	.	.	.	.	.	.	.	.	.	.	.	.
GCA_014880975.1_ASM1488097v1	7	.	.	.	.	.	.	.	.	.	.	.	.	.	.	.	.	.	.	.	.	.	.	.	.	.	.	.	.	.	.	.	.	.	.	.	.	.	.	99.88	.	.	.	.	.	.	.	.	.
GCA_014881005.1_ASM1488100v1	14	.	.	.	.	.	.	.	.	.	.	.	.	.	.	100.00	.	.	.	.	.	.	.	.	.	.	.	.	97.92	.	.	100.00	.	.	.	.	.	.	.	99.88	.	.	.	.	.	.	.	.	.
GCA_014881035.1_ASM1488103v1	10	.	.	.	.	.	.	.	.	.	.	.	.	.	.	.	.	.	.	.	.	.	.	.	.	.	.	.	.	.	.	.	.	.	.	.	.	.	.	99.88	.	.	.	.	.	.	.	.	100.00
GCA_014881045.1_ASM1488104v1	5	.	.	.	.	.	.	.	.	.	.	.	.	.	.	.	.	.	.	.	.	.	.	.	.	.	.	.	.	.	.	.	.	.	.	.	.	.	.	.	.	.	.	.	.	.	.	.	.
GCA_014881055.2_ASM1488105v2	9	.	.	.	.	.	.	.	.	.	.	.	.	.	.	.	.	.	.	.	.	.	.	.	.	.	.	.	97.92	.	.	100.00	.	.	.	.	.	.	.	.	.	.	.	.	.	.	.	.	.
GCA_014881085.1_ASM1488108v1	9	.	.	.	.	.	.	.	.	.	.	.	.	.	.	.	.	.	.	.	.	.	.	.	.	.	.	.	97.92	.	.	100.00	.	.	.	.	.	.	.	.	.	.	.	.	.	.	.	.	.
GCA_014881115.1_ASM1488111v1	6	.	.	.	.	.	.	.	.	.	.	.	.	.	.	.	.	.	.	.	.	.	.	.	.	.	.	.	.	.	.	.	.	.	.	.	.	.	.	99.88	.	.	.	.	.	.	.	.	.
GCA_014881125.1_ASM1488112v1	8	.	.	.	.	.	.	.	.	.	.	.	.	.	.	.	.	.	.	.	.	.	.	.	.	.	.	.	.	.	.	.	.	.	.	.	.	.	.	99.88	.	.	.	.	.	100.00	.	.	.
GCA_014881155.1_ASM1488115v1	11	.	.	.	.	.	.	.	.	.	.	.	.	.	.	.	.	.	.	.	.	.	.	.	.	.	.	.	97.92	.	.	100.00	.	.	.	.	.	.	.	.	.	.	.	.	.	.	.	.	.
GCA_014881165.1_ASM1488116v1	14	.	.	.	.	.	.	.	.	.	.	.	.	.	.	.	.	.	.	.	.	.	.	.	.	.	.	.	97.92	.	.	100.00	.	.	.	.	.	.	.	.	.	.	.	.	.	.	.	.	.
GCA_014881195.1_ASM1488119v1	9	.	.	.	.	.	.	.	.	.	.	.	.	.	.	.	.	.	.	.	.	.	.	.	.	.	.	.	97.92	.	.	100.00	.	.	.	.	.	.	.	.	.	.	.	.	.	.	.	.	.
GCA_014881205.1_ASM1488120v1	4	.	.	.	.	.	.	.	.	.	.	.	.	.	.	.	.	.	.	.	.	.	.	.	.	.	.	.	.	.	.	.	.	.	.	.	.	.	.	.	.	.	.	.	.	.	.	.	.
GCA_014881235.1_ASM1488123v1	16	.	.	.	.	.	.	.	.	.	.	.	.	.	.	.	.	.	.	.	.	.	.	.	.	.	.	.	.	.	.	.	.	.	.	.	82.51	.	.	99.88	.	.	.	.	.	.	.	.	85.17
GCA_014881245.1_ASM1488124v1	4	.	.	.	.	.	.	.	.	.	.	.	.	.	.	.	.	.	.	.	.	.	.	.	.	.	.	.	.	.	.	.	.	.	.	.	.	.	.	.	.	.	.	.	.	.	.	.	.
GCA_014881275.1_ASM1488127v1	14	.	.	.	.	.	.	.	.	.	.	.	.	.	.	100.00	.	.	.	.	.	.	.	.	.	.	.	.	97.92	.	.	100.00	.	.	.	.	.	.	.	99.88	.	.	.	.	.	.	.	.	.
GCA_014881295.1_ASM1488129v1	14	.	.	.	.	.	.	.	.	.	.	.	.	.	.	.	.	.	.	.	.	.	.	.	.	.	.	.	.	.	.	.	.	.	.	.	82.51	.	.	99.88	.	.	.	.	.	.	.	.	100.00
GCA_014881305.1_ASM1488130v1	15	.	100.00	.	.	.	.	.	.	.	.	.	.	.	.	.	.	.	.	.	.	.	.	.	.	.	.	.	.	.	.	.	.	.	.	.	.	.	.	99.88	.	.	.	.	.	.	.	.	.
GCA_014881315.1_ASM1488131v1	16	.	.	.	.	.	.	.	.	.	.	.	.	.	.	.	.	.	.	.	.	.	.	.	.	.	.	.	.	.	.	.	.	.	.	.	82.51	.	.	99.88	.	.	.	.	.	.	.	.	100.00
GCA_014881325.1_ASM1488132v1	16	.	100.00	.	.	.	.	.	.	.	.	.	.	.	.	.	.	.	.	.	.	.	.	.	.	.	.	.	.	.	.	.	.	.	.	.	.	.	.	99.88	.	.	.	.	.	.	.	.	100.00
GCA_014881375.1_ASM1488137v1	16	.	100.00	.	.	.	.	.	.	.	.	.	.	.	.	.	.	.	.	.	.	.	.	.	.	.	.	.	.	.	.	.	.	.	.	.	.	.	.	99.88	.	.	.	.	.	.	.	.	100.00
GCA_014881395.1_ASM1488139v1	15	.	.	.	.	.	.	.	.	.	.	.	.	.	.	.	.	.	.	.	.	.	.	.	.	.	.	.	.	.	.	.	.	.	.	.	82.51	.	.	99.88	.	.	.	.	.	.	.	.	100.00
GCA_014881405.1_ASM1488140v1	16	.	100.00	.	.	.	.	.	.	.	.	.	.	.	.	.	.	.	.	.	.	.	.	.	.	.	.	.	.	.	.	.	.	.	.	.	.	.	.	99.88	.	.	.	.	.	.	.	.	100.00
GCA_014881415.1_ASM1488141v1	16	.	100.00	.	.	.	.	.	.	.	.	.	.	.	.	.	.	.	.	.	.	.	.	.	.	.	.	.	.	.	.	.	.	.	.	.	.	.	.	99.88	.	.	.	.	.	.	.	.	100.00
GCA_014881445.1_ASM1488144v1	14	.	100.00	.	.	.	.	.	.	.	.	.	.	.	.	.	.	.	.	.	.	.	.	.	.	.	.	.	.	.	.	.	.	.	.	.	.	.	.	99.88	.	.	.	.	.	.	.	.	.
GCA_014881465.1_ASM1488146v1	4	.	.	.	.	.	.	.	.	.	.	.	.	.	.	.	.	.	.	.	.	.	.	.	.	.	.	.	.	.	.	.	.	.	.	.	.	.	.	.	.	.	.	.	.	.	.	.	.
GCA_014881495.1_ASM1488149v1	11	.	.	.	.	.	.	.	.	.	.	.	.	.	.	.	.	.	.	.	.	.	.	.	.	.	.	.	.	.	.	.	.	.	.	.	.	.	.	99.88	.	.	.	.	.	.	.	.	100.00
GCA_014881505.1_ASM1488150v1	14	.	100.00	.	.	.	.	.	.	.	.	.	.	.	.	.	.	.	.	.	.	.	.	.	.	.	.	.	.	.	.	.	.	.	.	.	.	.	.	99.88	.	.	.	.	.	.	.	.	.
GCA_014881525.1_ASM1488152v1	7	.	.	.	.	.	.	.	.	.	.	.	.	.	.	.	.	.	.	.	.	.	.	.	.	.	.	.	.	.	.	.	.	.	.	.	.	.	.	99.88	.	.	.	.	.	.	.	.	.
GCA_014881545.1_ASM1488154v1	8	.	.	.	.	.	.	.	.	.	.	.	.	.	.	.	.	.	.	.	.	.	.	.	.	.	.	.	.	.	.	.	.	.	.	.	.	.	.	99.88	.	.	.	.	.	.	.	.	.
GCA_014881575.1_ASM1488157v1	8	.	.	.	.	.	.	.	.	.	.	.	.	.	.	.	.	.	.	.	.	.	.	.	.	.	.	.	.	.	.	.	.	.	.	.	.	.	.	99.88	.	.	.	.	.	.	.	.	.
GCA_014881595.1_ASM1488159v1	5	.	.	.	.	.	.	.	.	.	.	.	.	.	.	.	.	.	.	.	.	.	.	.	.	.	.	.	.	.	.	.	.	.	.	.	.	.	.	.	.	.	.	.	.	.	.	.	.
GCA_014881615.1_ASM1488161v1	11	.	.	.	.	.	.	.	.	.	.	.	.	.	100.00	.	.	.	.	.	.	.	.	.	.	.	.	.	.	.	.	.	.	.	.	.	.	.	.	99.88	.	.	.	.	.	.	.	.	.
GCA_014881625.1_ASM1488162v1	10	.	.	.	.	.	.	.	.	.	.	.	.	.	.	100.00	.	.	.	.	.	.	.	.	.	.	.	.	.	.	.	.	.	.	.	.	.	.	.	99.88	.	.	.	.	.	.	.	.	.
GCA_014881635.1_ASM1488163v1	11	.	.	.	.	.	.	.	.	.	.	.	.	.	.	100.00	.	.	.	.	.	.	.	.	.	.	.	.	.	.	.	.	.	.	.	.	.	.	.	99.88	.	.	.	.	.	.	.	.	.
GCA_014881675.1_ASM1488167v1	10	.	.	.	.	.	.	.	.	.	.	.	.	.	.	100.00	.	.	.	.	.	.	.	.	.	.	.	.	.	.	.	.	.	.	.	.	.	.	.	99.88	.	.	.	.	.	.	.	.	.
GCA_014881695.1_ASM1488169v1	10	.	.	.	.	.	.	.	.	.	.	.	.	.	.	100.00	.	.	.	.	.	.	.	.	.	.	.	.	.	.	.	.	.	.	.	.	.	.	.	99.88	.	.	.	.	.	.	.	.	.
GCA_014881705.1_ASM1488170v1	11	.	.	.	.	.	.	.	.	.	.	.	.	.	.	100.00	.	.	.	.	.	.	.	.	.	.	.	.	.	.	.	.	.	.	.	.	.	.	.	99.88	.	.	.	.	.	.	.	.	.
GCA_014881715.1_ASM1488171v1	14	.	.	.	.	.	.	.	.	.	.	.	.	.	.	.	.	.	.	.	.	.	.	.	.	.	.	.	.	.	.	100.00	.	.	.	.	.	.	.	99.88	.	.	.	.	.	.	.	.	.
GCA_014881755.1_ASM1488175v1	10	.	.	.	.	.	.	.	.	.	.	.	.	.	.	100.00	.	.	.	.	.	.	.	.	.	.	.	.	.	.	.	.	.	.	.	.	.	.	.	99.88	.	.	.	.	.	.	.	.	.
GCA_014881775.1_ASM1488177v1	14	.	.	.	.	.	.	.	.	.	.	.	.	.	.	.	.	.	.	.	.	.	.	.	.	.	.	.	97.92	.	.	100.00	.	.	.	.	.	.	.	.	.	.	.	.	.	.	.	.	.
GCA_014881795.1_ASM1488179v1	11	.	.	.	.	.	.	.	.	.	.	.	.	.	.	100.00	.	.	.	.	.	.	.	.	.	.	.	.	.	.	.	.	.	.	.	.	.	.	.	99.88	.	.	.	.	.	.	.	.	.
GCA_014881805.1_ASM1488180v1	14	.	.	.	.	.	.	.	.	.	.	.	.	.	.	100.00	.	.	.	.	.	.	.	.	.	.	.	.	97.92	.	.	100.00	.	.	.	.	.	.	.	99.88	.	.	.	.	.	.	.	.	.
GCA_014881835.1_ASM1488183v1	8	.	.	.	.	.	.	.	.	.	.	.	.	.	.	.	.	.	.	.	.	.	.	.	.	.	.	.	.	.	.	.	.	.	.	.	.	.	.	99.88	.	.	.	.	.	.	.	.	.
GCA_014881855.1_ASM1488185v1	9	.	.	.	.	.	.	.	.	.	.	.	.	.	.	.	.	.	.	.	.	.	.	.	.	.	.	.	97.92	.	.	100.00	.	.	.	.	.	.	.	.	.	.	.	.	.	.	.	.	.
GCA_014881865.1_ASM1488186v1	5	.	.	.	.	.	.	.	.	.	.	.	.	.	.	.	.	.	.	.	.	.	.	.	.	.	.	.	.	.	.	.	.	.	.	.	.	.	.	.	.	.	.	.	.	.	.	.	.
GCA_014881895.1_ASM1488189v1	12	.	.	.	.	.	.	.	.	.	.	.	.	.	.	.	.	.	.	.	.	.	.	.	.	.	.	.	97.92	.	.	100.00	.	.	.	.	.	.	.	.	.	.	.	.	.	74.14	.	.	.
GCA_014881905.1_ASM1488190v1	16	.	.	.	.	.	.	.	.	.	.	.	.	.	.	.	.	.	.	.	.	.	.	.	.	.	.	.	97.92	.	100.00	100.00	.	.	.	.	.	.	.	.	100.00	.	.	.	.	.	.	.	.
GCA_014881935.1_ASM1488193v1	4	.	.	.	.	.	.	.	.	.	.	.	.	.	.	.	.	.	.	.	.	.	.	.	.	.	.	.	.	.	.	.	.	.	.	.	.	.	.	.	.	.	.	.	.	.	.	.	.
GCA_014881945.1_ASM1488194v1	9	.	.	.	.	.	.	.	.	.	.	.	.	.	.	.	.	.	.	.	.	.	.	.	.	.	.	.	97.92	.	.	100.00	.	.	.	.	.	.	.	.	.	.	.	.	.	.	.	.	.
GCA_014881975.1_ASM1488197v1	4	.	.	.	.	.	.	.	.	.	.	.	.	.	.	.	.	.	.	.	.	.	.	.	.	.	.	.	.	.	.	.	.	.	.	.	.	.	.	.	.	.	.	.	.	.	.	.	.
GCA_014881985.1_ASM1488198v1	9	.	.	.	.	.	.	.	.	.	.	.	.	.	.	.	.	.	.	.	.	.	.	.	.	.	.	.	97.92	.	.	100.00	.	.	.	.	.	.	.	.	.	.	.	.	.	.	.	.	.
GCA_014882015.1_ASM1488201v1	9	.	.	.	.	.	.	.	.	.	.	.	.	.	.	.	.	.	.	.	.	.	.	.	.	.	.	.	97.92	.	.	100.00	.	.	.	.	.	.	.	.	.	.	.	.	.	.	.	.	.
GCA_014882025.1_ASM1488202v1	5	.	.	.	.	.	.	.	.	.	.	.	.	.	.	.	.	.	.	.	.	.	.	.	.	.	.	.	.	.	.	.	.	.	.	.	.	.	.	.	.	.	.	.	.	.	.	.	.
GCA_014882035.1_ASM1488203v1	7	.	.	.	.	.	.	.	.	.	.	100.00	.	.	.	.	.	.	.	.	.	.	.	.	.	.	.	.	.	.	.	.	.	.	.	.	82.51	.	.	.	.	.	.	.	.	.	.	.	.
GCA_014882075.1_ASM1488207v1	9	.	.	.	.	.	.	.	.	.	.	.	.	.	.	.	.	.	.	.	.	.	.	.	.	.	.	.	97.92	.	.	100.00	.	.	.	.	.	.	.	.	.	.	.	.	.	.	.	.	.
GCA_014882095.1_ASM1488209v1	9	.	.	.	.	.	.	.	.	.	.	.	.	.	.	.	.	.	.	.	.	.	.	.	.	.	.	.	97.92	.	.	100.00	.	.	.	.	.	.	.	.	.	.	.	.	.	.	.	.	.
GCA_014882115.1_ASM1488211v1	8	.	.	.	.	.	.	.	.	.	.	.	.	.	.	.	.	.	.	.	.	.	.	.	.	.	.	.	.	.	.	.	.	.	.	.	.	.	.	99.88	.	.	.	.	.	.	.	.	.
GCA_014882125.1_ASM1488212v1	3	.	.	.	.	.	.	.	.	.	.	.	.	.	.	.	.	.	.	.	.	.	.	.	.	.	.	.	.	.	.	.	.	.	.	.	.	.	.	.	.	.	.	.	.	.	.	.	.
GCA_014882135.1_ASM1488213v1	8	.	.	.	.	.	.	.	.	.	.	.	.	.	.	.	.	.	.	.	.	.	.	.	.	.	.	.	.	.	.	.	.	.	.	.	.	.	.	99.88	.	.	.	.	.	.	.	.	.
GCA_014882145.1_ASM1488214v1	5	.	.	.	.	.	.	.	.	.	.	.	.	.	.	.	.	.	.	.	.	.	.	.	.	.	.	.	.	.	.	.	.	.	.	.	.	.	.	.	.	.	.	.	.	.	.	.	.
GCA_014882195.1_ASM1488219v1	9	.	.	.	.	.	.	.	.	.	.	.	.	.	.	.	.	.	.	.	.	.	.	.	.	.	.	.	97.92	.	.	100.00	.	.	.	.	.	.	.	.	.	.	.	.	.	.	.	.	.
GCA_014882215.1_ASM1488221v1	4	.	.	.	.	.	.	.	.	.	.	.	.	.	.	.	.	.	.	.	.	.	.	.	.	.	.	.	.	.	.	.	.	.	.	.	.	.	.	.	.	.	.	.	.	.	.	.	.
GCA_014882235.1_ASM1488223v1	9	.	.	.	.	.	.	.	.	.	.	.	.	.	.	.	.	.	.	.	.	.	.	.	.	.	.	.	97.92	.	.	100.00	.	.	.	.	.	.	.	.	.	.	.	.	.	.	.	.	.
GCA_014882245.1_ASM1488224v1	9	.	.	.	.	.	.	.	.	.	.	.	.	.	.	.	.	.	.	.	.	.	.	.	.	.	.	.	97.92	.	.	100.00	.	.	.	.	.	.	.	.	.	.	.	.	.	.	.	.	.
GCA_014882275.1_ASM1488227v1	7	.	.	.	.	.	.	.	.	.	.	.	.	.	.	.	.	.	.	.	.	.	.	.	.	.	.	.	97.92	.	.	100.00	.	.	.	.	.	.	.	.	.	.	.	.	.	.	.	.	.
GCA_014882285.1_ASM1488228v1	9	.	.	.	.	.	.	.	.	.	.	.	.	.	.	.	.	.	.	.	.	.	.	.	.	.	.	.	97.92	.	.	100.00	.	.	.	.	.	.	.	.	.	.	.	.	.	.	.	.	.
GCA_014882295.1_ASM1488229v1	9	.	.	.	.	.	.	.	.	.	.	.	.	.	.	.	.	.	.	.	.	.	.	.	.	.	.	.	97.92	.	.	100.00	.	.	.	.	.	.	.	.	.	.	.	.	.	.	.	.	.
GCA_014882325.1_ASM1488232v1	9	.	.	.	.	.	.	.	.	.	.	.	.	.	.	.	.	.	.	.	.	.	.	.	.	.	.	.	97.92	.	.	100.00	.	.	.	.	.	.	.	.	.	.	.	.	.	.	.	.	.
GCA_014882355.1_ASM1488235v1	9	.	.	.	.	.	100.00	.	.	.	.	.	.	.	.	100.00	.	.	.	.	.	.	.	.	.	.	.	.	.	.	.	.	.	.	.	.	.	.	.	99.88	.	.	.	.	.	.	.	.	.
GCA_014882365.1_ASM1488236v1	9	.	.	.	.	.	.	.	.	.	.	.	.	.	.	.	.	.	.	.	.	.	.	.	.	.	.	.	97.92	.	.	100.00	.	.	.	.	.	.	.	.	.	.	.	.	.	.	.	.	.
GCA_014882395.1_ASM1488239v1	5	.	.	.	.	.	.	.	.	.	.	.	.	.	.	.	.	.	.	.	.	.	.	.	.	.	.	.	.	.	.	.	.	.	.	.	.	.	.	.	.	.	.	.	.	.	.	.	.
GCA_014882405.1_ASM1488240v1	10	.	.	.	.	.	.	100.00	.	.	.	.	.	.	.	.	.	100.00	.	.	.	.	100.00	.	.	.	.	.	.	.	.	.	.	.	.	.	.	.	.	.	.	.	.	.	.	.	100.00	.	.
GCA_014882435.1_ASM1488243v1	9	.	.	.	.	.	.	.	.	.	.	.	.	.	.	.	.	.	.	.	.	.	.	.	.	.	.	.	97.92	.	.	100.00	.	.	.	.	.	.	.	.	.	.	.	.	.	.	.	.	.
GCA_014882455.1_ASM1488245v1	16	.	100.00	.	.	.	.	.	.	.	.	.	.	.	.	.	.	.	.	.	.	.	.	.	.	.	.	.	.	.	.	.	.	.	.	.	.	.	.	99.88	.	.	.	.	.	.	.	.	100.00
GCA_014882475.1_ASM1488247v1	8	.	.	.	.	.	.	.	.	.	.	.	.	.	.	.	.	.	.	.	.	.	.	.	.	.	.	.	97.92	.	.	100.00	.	.	.	.	.	.	.	.	.	.	.	.	.	.	.	.	.
GCA_014882485.1_ASM1488248v1	9	.	.	.	.	.	.	.	.	.	.	.	.	.	.	.	.	.	.	.	.	.	.	.	.	.	.	.	97.92	.	.	100.00	.	.	.	.	.	.	.	.	.	.	.	.	.	.	.	.	.
GCA_014882515.1_ASM1488251v1	5	.	.	.	.	.	.	.	.	.	.	.	.	.	.	.	.	.	.	.	.	.	.	.	.	.	.	.	.	.	.	.	.	.	.	.	.	.	.	.	.	.	.	.	.	.	.	.	.
GCA_014882555.1_ASM1488255v1	12	.	.	.	.	.	.	.	.	.	.	.	.	.	.	.	.	.	.	.	.	.	.	.	.	.	.	.	97.92	.	.	100.00	.	.	.	.	.	.	.	.	.	.	.	.	.	74.14	.	.	.
GCA_014882575.1_ASM1488257v1	9	.	.	.	.	.	.	.	.	.	.	.	.	.	.	.	.	.	.	.	.	.	.	.	.	.	.	.	97.92	.	.	100.00	.	.	.	.	.	.	.	.	.	.	.	.	.	.	.	.	.
GCA_014882605.1_ASM1488260v1	11	.	.	.	.	.	.	.	.	.	.	.	.	.	.	.	.	.	.	.	.	.	.	.	.	.	.	.	97.92	.	.	100.00	.	.	.	.	.	.	.	.	.	.	.	.	.	.	.	.	.
GCA_014882625.1_ASM1488262v1	11	.	.	.	.	.	.	.	.	.	.	.	.	.	.	.	.	.	.	.	.	.	.	.	.	.	.	.	97.92	.	.	100.00	.	.	.	.	.	.	.	.	.	.	.	.	.	.	.	.	.
GCA_014882655.1_ASM1488265v1	9	.	.	.	.	.	.	.	.	.	.	.	.	.	.	.	.	.	.	.	.	.	.	.	.	.	.	.	97.92	.	.	100.00	.	.	.	.	.	.	.	.	.	.	.	.	.	.	.	.	.
GCA_014882665.1_ASM1488266v1	9	.	.	.	.	.	.	.	.	.	.	.	.	.	.	.	.	.	.	.	.	.	.	.	.	.	.	.	97.92	.	.	100.00	.	.	.	.	.	.	.	.	.	.	.	.	.	.	.	.	.
GCA_014882685.1_ASM1488268v1	9	.	.	.	.	.	.	.	.	.	.	.	.	.	.	.	.	.	.	.	.	.	.	.	.	.	.	.	97.92	.	.	100.00	.	.	.	.	.	.	.	.	.	.	.	.	.	.	.	.	.
GCA_014882705.1_ASM1488270v1	9	.	.	.	.	.	.	.	.	.	.	.	.	.	.	.	.	.	.	.	.	.	.	.	.	.	.	.	97.92	.	.	100.00	.	.	.	.	.	.	.	.	.	.	.	.	.	.	.	.	.
GCA_014882735.1_ASM1488273v1	11	.	.	.	.	.	.	.	.	.	.	.	.	.	.	.	.	.	.	.	.	.	.	.	.	.	.	.	97.92	.	.	100.00	.	.	.	.	.	.	.	.	.	.	.	.	.	.	.	.	.
GCA_014882755.1_ASM1488275v1	9	.	.	.	.	.	.	.	.	.	.	.	.	.	.	.	.	.	.	.	.	.	.	.	.	.	.	.	97.92	.	.	100.00	.	.	.	.	.	.	.	.	.	.	.	.	.	.	.	.	.
GCA_014882765.1_ASM1488276v1	9	.	.	.	.	.	.	.	.	.	.	.	.	.	.	.	.	.	.	.	.	.	.	.	.	.	.	.	97.92	.	.	100.00	.	.	.	.	.	.	.	.	.	.	.	.	.	.	.	.	.
GCA_014882795.1_ASM1488279v1	9	.	.	.	.	.	.	.	.	.	.	.	.	.	.	.	.	.	.	.	.	.	.	.	.	.	.	.	97.92	.	.	100.00	.	.	.	.	.	.	.	.	.	.	.	.	.	.	.	.	.
GCA_014882805.2_ASM1488280v2	5	.	.	.	.	.	.	.	.	.	.	.	.	.	.	.	.	.	.	.	.	.	.	.	.	.	.	.	.	.	.	.	.	.	.	.	.	.	.	.	.	.	.	.	.	.	.	.	.
GCA_014882835.1_ASM1488283v1	11	.	.	.	.	.	.	.	.	.	.	.	.	.	.	.	.	.	.	.	.	.	.	.	.	.	.	.	97.92	.	.	100.00	.	.	.	.	.	.	.	.	.	.	.	.	.	.	.	.	.
GCA_014882855.1_ASM1488285v1	5	.	.	.	.	.	.	.	.	.	.	.	.	.	.	.	.	.	.	.	.	.	.	.	.	.	.	.	.	.	.	.	.	.	.	.	.	.	.	.	.	.	.	.	.	.	.	.	.
GCA_014882865.1_ASM1488286v1	8	.	.	.	.	.	.	.	.	.	.	.	.	.	.	.	.	.	.	.	.	.	.	.	.	.	.	.	.	.	.	.	.	.	.	.	.	.	.	99.88	.	.	.	.	.	.	.	.	.
GCA_014882875.1_ASM1488287v1	6	.	.	.	.	.	.	.	.	.	.	.	.	.	.	.	.	.	.	.	.	.	.	.	.	.	.	.	.	.	.	.	.	.	.	.	.	.	.	.	.	.	.	.	.	.	.	.	.
GCA_014882895.1_ASM1488289v1	11	.	.	.	.	.	.	.	.	.	.	.	.	.	.	.	.	.	.	.	.	.	.	.	.	.	.	.	97.92	.	.	100.00	.	.	.	.	.	.	.	.	.	.	.	.	.	.	.	.	.
GCA_014882925.1_ASM1488292v1	11	.	.	.	.	.	.	.	.	.	.	.	.	.	.	.	.	.	.	.	.	.	.	.	.	.	.	.	97.92	.	.	100.00	.	.	.	.	.	.	.	.	.	.	.	.	.	.	.	.	.
GCA_014882955.1_ASM1488295v1	10	.	.	.	.	.	.	.	.	.	.	.	.	.	.	.	.	.	.	.	.	.	.	.	.	.	.	.	97.92	.	.	100.00	.	.	.	.	.	.	.	.	.	.	.	.	.	.	.	.	.
GCA_014882965.1_ASM1488296v1	11	.	.	.	.	.	.	.	.	.	.	.	.	.	.	.	.	.	.	.	.	.	.	.	.	.	.	.	97.92	.	.	100.00	.	.	.	.	.	.	.	.	.	.	.	.	.	.	.	.	.
GCA_014882975.1_ASM1488297v1	5	.	.	.	.	.	.	.	.	.	.	.	.	.	.	.	.	.	.	.	.	.	.	.	.	.	.	.	.	.	.	.	.	.	.	.	.	.	.	.	.	.	.	.	.	.	.	.	.
GCA_014882995.1_ASM1488299v1	13	.	.	.	.	.	.	.	.	.	.	.	.	.	.	.	.	.	.	.	.	.	.	.	.	.	.	.	.	.	.	.	.	.	.	.	.	.	.	99.88	.	.	.	.	.	.	.	.	100.00
GCA_014883035.1_ASM1488303v1	4	.	.	.	.	.	.	.	.	.	.	.	.	.	.	.	.	.	.	.	.	.	.	.	.	.	.	.	.	.	.	.	.	.	.	.	.	.	.	.	.	.	.	.	.	.	.	.	.
GCA_014883045.1_ASM1488304v1	11	.	.	.	.	.	.	.	.	.	.	.	.	.	.	.	.	.	.	.	.	.	.	.	.	.	.	.	97.92	.	.	100.00	.	.	.	.	.	.	.	.	.	.	.	.	.	.	.	.	.
GCA_014883075.1_ASM1488307v1	15	.	100.00	.	.	.	.	.	.	.	.	.	.	.	.	.	.	.	.	.	.	.	.	.	.	.	.	.	.	.	.	.	.	.	.	.	.	.	.	99.88	.	.	.	.	.	.	.	.	.
GCA_014883095.1_ASM1488309v1	8	.	.	.	.	.	.	.	.	.	.	.	.	.	.	.	.	.	.	.	.	.	.	.	.	.	.	.	97.92	.	.	100.00	.	.	.	.	.	.	.	.	.	.	.	.	.	.	.	.	.
GCA_014883115.1_ASM1488311v1	12	.	.	.	.	.	.	.	.	.	.	.	.	.	.	.	.	.	.	.	.	.	.	.	.	.	.	.	.	.	.	.	.	.	.	.	.	.	.	99.88	.	.	.	.	.	.	.	.	100.00
GCA_014883155.1_ASM1488315v1	9	.	.	.	.	.	.	.	.	.	.	.	.	.	.	.	.	.	.	.	.	.	.	.	.	.	.	.	97.92	.	.	100.00	.	.	.	.	.	.	.	.	.	.	.	.	.	.	.	.	.
GCA_015356075.1_ASM1535607v1	9	.	.	.	.	.	.	.	.	.	.	.	.	.	.	.	.	100.00	.	.	.	.	.	.	.	.	.	.	.	.	.	100.00	.	.	.	.	.	.	.	.	.	.	.	.	.	.	.	.	.
GCA_015832155.1_ASM1583215v1	9	.	.	.	.	.	.	.	.	.	.	.	.	.	.	.	.	.	.	.	.	.	.	.	.	.	.	.	.	.	.	.	100.00	.	.	.	.	.	.	.	.	.	.	.	.	.	.	.	.
GCA_016055375.1_ASM1605537v1	17	.	.	.	.	.	.	.	.	.	.	.	.	.	.	.	.	.	.	.	.	.	.	.	.	.	.	.	.	.	.	.	.	.	.	.	82.30	.	.	99.88	.	.	.	.	.	.	.	.	.
GCA_016470275.1_PDT000908016.1	3	.	.	.	.	.	.	.	.	.	.	.	.	.	.	.	.	.	.	.	.	.	.	.	.	.	.	.	.	.	.	.	.	.	.	.	.	.	.	.	.	.	.	.	.	.	.	.	.
GCA_016470295.1_PDT000908014.1	11	.	.	.	.	.	.	.	.	.	.	89.33;97.00	.	.	100.00;100.00	.	.	.	.	.	.	.	.	.	.	.	.	.	.	.	.	.	.	.	.	.	.	.	.	99.88;99.88	.	.	.	.	.	.	.	.	.
GCA_016470315.1_PDT000908015.1	8	.	.	.	.	.	.	.	.	.	.	.	.	.	.	100.00;100.00	.	.	.	.	.	.	.	.	.	.	.	.	.	.	.	100.00;100.00	.	.	.	.	.	.	.	.	.	.	.	.	.	.	.	.	100.00;100.00
GCA_016470355.1_PDT000908013.1	12	.	.	.	.	.	.	.	.	.	.	89.33;97.00	.	.	100.00;100.00;100.00	.	.	.	.	.	.	.	.	.	.	.	.	.	.	.	.	.	.	.	.	.	.	.	.	99.88;99.88	.	.	.	.	.	.	.	.	.
GCA_016470395.1_PDT000908012.1	12	.	.	.	.	.	.	.	.	.	.	.	.	.	.	.	.	.	.	.	.	.	.	.	.	.	.	.	.	.	.	.	.	.	.	.	.	.	.	99.88;99.88	.	.	.	.	.	.	.	.	100.00;100.00
GCA_016470415.1_PDT000908010.1	12	.	.	.	.	.	.	.	.	.	.	.	.	.	.	.	.	.	.	.	.	.	.	.	.	.	.	.	.	.	.	.	.	.	.	.	.	.	.	99.88;99.88	.	.	.	.	.	.	.	.	100.00;100.00
GCA_016470435.1_PDT000908005.1	9	.	.	.	.	.	.	.	.	.	.	.	.	.	.	.	.	.	.	.	.	.	.	.	.	.	.	.	97.92;97.92	.	.	100.00;100.00	.	.	.	.	.	.	.	.	.	.	.	.	.	.	100.00;100.00	.	.
GCA_016470455.1_PDT000908003.1	16	.	.	.	.	.	.	.	.	.	.	.	.	.	.	.	.	.	.	.	.	.	.	.	.	.	.	.	97.92;97.92;97.92;97.92	.	.	100.00;100.00	.	.	.	.	.	.	.	.	.	.	.	.	.	.	.	.	.
GCA_016470475.1_PDT000908006.1	12	.	.	.	.	.	.	.	.	.	.	.	.	.	.	.	.	.	.	.	.	.	.	.	.	.	.	.	.	.	.	.	.	.	.	.	.	.	.	99.88;99.88;99.88	.	.	.	.	.	.	.	.	100.00;100.00
GCA_016470495.1_PDT000908004.1	18	.	.	.	.	.	.	.	.	.	.	89.33;96.44	.	.	100.00;100.00	.	.	.	.	.	.	.	.	.	.	.	87.12	.	.	.	.	.	.	.	.	.	82.51;82.51	.	.	99.88;99.88	.	.	.	.	.	.	.	.	100.00
GCA_016470515.1_PDT000908008.1	12	.	.	.	.	.	.	.	.	.	.	.	.	.	.	.	.	.	.	.	.	.	.	.	.	.	.	.	.	.	.	.	.	.	.	.	.	.	.	99.88;99.88	.	.	.	.	.	.	.	.	100.00;100.00
GCA_016470535.1_PDT000908009.1	12	.	.	.	.	.	.	.	.	.	.	.	.	.	.	.	.	.	.	.	.	.	.	.	.	.	.	.	.	.	.	.	.	.	.	.	.	.	.	99.88;99.88	.	.	.	.	.	.	.	.	100.00;100.00
GCA_016470555.1_PDT000908000.1	13	.	.	.	.	.	.	.	.	.	.	.	.	.	.	.	.	.	.	.	.	.	.	.	.	.	.	.	.	.	.	.	.	.	.	.	.	.	.	99.88;99.88	.	.	.	.	.	.	.	.	100.00;100.00
GCA_016470575.1_PDT000908007.1	13	.	.	.	.	.	.	.	.	.	.	.	.	.	.	.	.	.	.	.	.	.	.	.	.	.	.	.	.	.	.	.	.	.	.	.	.	.	.	99.88;99.88	.	.	.	.	.	.	.	.	100.00;100.00
GCA_016470585.1_PDT000908001.1	12	.	.	.	.	.	.	.	.	.	.	.	.	.	.	.	.	.	.	.	.	.	.	.	.	.	.	.	.	.	.	.	.	.	.	.	.	.	.	99.88;99.88	.	.	.	.	.	.	.	.	100.00;100.00
GCA_016470615.1_PDT000908002.1	11	.	.	.	.	.	.	.	.	.	.	.	.	.	.	.	.	.	.	.	.	.	.	.	.	.	.	.	.	.	.	.	.	.	.	.	.	.	.	99.88;99.88	.	.	.	.	.	.	.	.	.
GCA_016470635.1_PDT000907999.1	9	.	.	.	.	.	.	.	.	.	.	.	.	.	100.00;100.00	.	.	.	.	.	.	.	.	.	.	.	.	.	.	.	.	.	.	.	.	.	.	.	.	99.88;99.88	.	.	.	.	.	.	.	.	.
GCA_016470655.1_PDT000907998.1	10	.	.	.	.	.	.	.	.	.	.	.	.	.	.	.	.	.	.	.	.	.	.	.	.	.	.	.	.	.	.	.	.	.	.	.	.	.	.	99.88;99.88	.	.	.	.	.	.	.	.	.
GCA_016470675.1_PDT000907987.1	11	.	.	.	.	.	.	.	.	.	.	.	.	.	.	.	.	.	.	.	.	.	.	.	.	.	.	.	.	.	.	.	.	.	.	.	.	.	.	99.88;99.88	.	.	.	.	.	.	.	.	.
GCA_016470695.1_PDT000907989.1	13	.	.	.	.	.	.	.	.	.	.	.	.	.	.	.	.	.	.	.	.	.	.	.	.	.	.	.	.	.	.	.	.	.	.	.	.	.	.	99.88;99.88	.	.	.	.	.	.	.	.	100.00;100.00
GCA_016470715.1_PDT000901891.1	10	.	.	.	.	.	.	.	.	.	.	.	.	.	.	100.00;100.00	.	.	.	.	.	.	.	.	.	.	.	.	.	.	.	100.00;100.00	.	.	.	.	.	.	.	.	.	.	.	.	.	.	.	.	100.00;100.00
GCA_016470735.1_PDT000907988.1	11	.	.	.	.	.	.	.	.	.	.	.	.	.	.	.	.	.	.	.	.	.	.	.	.	.	.	.	.	.	.	.	.	.	.	.	.	.	.	99.88;99.88	.	.	.	.	.	.	.	.	.
GCA_016470755.1_PDT000907997.1	16	.	.	.	.	.	.	.	.	.	.	.	.	.	.	.	.	.	.	.	.	.	.	.	.	.	.	.	.	.	.	.	.	.	.	.	82.51;82.51	.	.	99.88;99.88	.	.	.	.	.	.	.	.	100.00;100.00
GCA_016470775.1_PDT000907995.1	13	.	.	.	.	.	.	.	.	.	.	.	.	.	.	.	.	.	.	.	.	.	.	.	.	.	.	.	.	.	.	.	.	.	.	.	.	.	.	99.88;99.88	.	.	.	.	.	.	.	.	100.00;100.00
GCA_016470795.1_PDT000907994.1	6	.	.	.	.	.	.	.	.	.	.	.	.	.	.	.	.	.	.	.	.	.	.	.	.	.	.	.	.	.	.	.	.	.	.	.	.	.	.	.	.	.	.	.	.	.	.	.	.
GCA_016470815.1_PDT000907996.1	4	.	.	.	.	.	.	.	.	.	.	.	.	.	.	.	.	.	.	.	.	.	.	.	.	.	.	.	.	.	.	.	.	.	.	.	.	.	.	.	.	.	.	.	.	.	.	.	.
GCA_016470835.1_PDT000907992.1	15	.	.	.	.	.	.	.	.	.	.	.	.	.	.	.	.	.	.	.	.	.	.	.	.	.	.	.	97.92;97.92	.	.	100.00;100.00	.	.	.	.	.	.	.	.	.	.	.	.	.	.	.	.	.
GCA_016470855.1_PDT000907991.1	4	.	.	.	.	.	.	.	.	.	.	.	.	.	.	.	.	.	.	.	.	.	.	.	.	.	.	.	.	.	.	.	.	.	.	.	.	.	.	.	.	.	.	.	.	.	.	.	.
GCA_016470875.1_PDT000907993.1	13	.	.	.	.	.	.	.	.	.	.	100.00;100.00	.	.	.	.	.	.	.	.	.	.	.	.	.	.	.	.	.	.	.	.	.	.	.	.	82.51;82.51	.	.	.	.	.	.	.	.	.	.	.	.
GCA_016470895.1_PDT000907990.1	17	.	.	.	.	.	.	.	.	.	.	88.76;96.44	.	.	100.00;100.00	.	.	.	.	.	.	.	.	.	.	.	.	.	.	.	.	.	.	.	.	.	82.51	.	.	99.88;99.88;99.88	.	.	.	.	.	.	.	.	100.00
GCA_016470915.1_PDT000901864.1	10	.	.	.	.	.	.	.	.	.	.	.	.	.	.	100.00;100.00	.	.	.	.	.	.	.	.	.	.	.	.	.	.	.	100.00;100.00	.	.	.	.	.	.	.	.	.	.	.	.	.	.	.	.	100.00;100.00
GCA_016470935.1_PDT000899566.1	11	.	.	.	.	.	.	.	.	.	.	.	.	.	.	.	.	.	.	.	.	.	.	.	.	.	.	.	.	.	.	.	.	.	.	.	.	.	.	99.88;99.88	.	.	.	.	.	.	.	.	.
GCA_016470955.1_PDT000901842.1	8	.	.	.	.	.	.	.	.	.	.	.	.	.	.	100.00;100.00	.	.	.	.	.	.	.	.	.	.	.	.	.	.	.	100.00;100.00	.	.	.	.	.	.	.	.	.	.	.	.	.	.	.	.	100.00;100.00
GCA_016470975.1_PDT000901811.1	5	.	.	.	.	.	.	.	.	.	.	.	.	.	.	.	.	.	.	.	.	.	.	.	.	.	.	.	.	.	.	.	.	.	.	.	.	.	.	.	.	.	.	.	.	.	.	.	.
GCA_016470995.1_PDT000901810.1	5	.	.	.	.	.	.	.	.	.	.	.	.	.	.	.	.	.	.	.	.	.	.	.	.	.	.	.	.	.	.	.	.	.	.	.	.	.	.	.	.	.	.	.	.	.	.	.	.
GCA_016471015.1_PDT000901890.1	10	.	.	.	.	.	.	.	.	.	.	.	.	.	.	100.00;100.00	.	.	.	.	.	.	.	.	.	.	.	.	.	.	.	100.00;100.00	.	.	.	.	.	.	.	.	.	.	.	.	.	.	.	.	100.00;100.00
GCA_016471035.1_PDT000901879.1	10	.	.	.	.	.	.	.	.	.	.	.	.	.	.	100.00;100.00	.	.	.	.	.	.	.	.	.	.	.	.	.	.	.	100.00;100.00	.	.	.	.	.	.	.	.	.	.	.	.	.	.	.	.	100.00;100.00
GCA_016471055.1_PDT000901860.1	10	.	.	.	.	.	.	.	.	.	.	.	.	.	.	100.00;100.00	.	.	.	.	.	.	.	.	.	.	.	.	.	.	.	100.00;100.00	.	.	.	.	.	.	.	.	.	.	.	.	.	.	.	.	100.00;100.00
GCA_016471075.1_PDT000901843.1	5	.	.	.	.	.	.	.	.	.	.	.	.	.	.	.	.	.	.	.	.	.	.	.	.	.	.	.	.	.	.	.	.	.	.	.	.	.	.	.	.	.	.	.	.	.	.	.	.
GCA_016471095.1_PDT000901855.1	12	.	.	.	.	.	.	.	.	.	.	.	.	.	.	.	.	.	.	.	.	.	.	.	.	.	.	.	.	.	.	100.00;100.00	.	.	.	.	.	.	.	.	.	.	.	.	.	.	.	.	.
GCA_016471115.1_PDT000901874.1	8	.	.	.	.	.	.	.	.	.	.	.	.	.	.	100.00;100.00	.	.	.	.	.	.	.	.	.	.	.	.	.	.	.	100.00;100.00	.	.	.	.	.	.	.	.	.	.	.	.	.	.	.	.	100.00;100.00
GCA_016471135.1_PDT000899562.1	11	.	.	.	.	.	.	.	.	.	.	.	.	.	.	.	.	.	.	.	.	.	.	.	.	.	.	.	.	.	.	.	.	.	.	.	.	.	.	99.88;99.88	.	.	.	.	.	.	.	.	100.00;100.00
GCA_016471155.1_PDT000899238.1	7	.	.	.	.	.	.	.	.	.	.	.	.	.	.	.	.	.	.	.	.	.	.	.	.	.	.	.	.	.	.	.	.	.	.	.	.	.	.	99.88;99.88	.	.	.	.	.	.	.	.	.
GCA_016471175.1_PDT000899435.1	8	.	.	.	.	.	.	.	.	.	.	100.00;100.00	.	.	.	.	.	.	.	.	.	.	.	.	.	.	.	.	.	.	.	.	.	.	.	.	.	.	.	99.88;99.88	.	.	.	.	.	.	.	.	.
GCA_016471195.1_PDT000899236.1	15	.	.	.	.	.	.	.	.	.	.	.	.	.	.	100.00;100.00	.	.	.	.	.	.	.	.	.	.	.	.	.	.	.	97.94;100.00	.	.	.	.	.	.	.	.	.	.	.	.	.	.	.	.	99.75;100.00
GCA_016471215.1_PDT000899239.1	11	.	.	.	.	.	.	.	.	.	.	.	.	.	.	.	.	.	.	.	.	.	.	.	.	.	.	.	.	.	.	.	.	.	.	.	.	.	.	99.88;99.88	.	.	.	.	.	.	.	.	.
GCA_016471235.1_PDT000899240.1	11	.	.	.	.	.	.	.	.	.	.	.	.	.	.	.	.	.	.	.	.	.	.	.	.	.	.	.	.	.	.	.	.	.	.	.	.	.	.	99.88;99.88	.	.	.	.	.	.	.	.	.
GCA_016471255.1_PDT000899450.1	11	.	.	.	.	.	.	.	.	.	.	100.00;96.44	.	.	.	.	.	.	.	.	.	.	.	.	.	.	87.50	.	.	.	.	.	.	.	.	.	82.51;82.51	.	.	.	.	.	.	.	.	.	.	.	.
GCA_016471275.1_PDT000899447.1	6	.	.	.	.	.	.	.	.	.	.	.	.	.	.	.	.	.	.	.	.	.	.	.	.	.	.	.	.	.	.	.	.	.	.	.	.	.	.	.	.	.	.	.	.	.	.	.	.
GCA_016471295.1_PDT000899234.1	7	.	.	.	.	.	.	.	.	.	.	.	.	.	.	.	.	.	.	.	.	.	.	.	.	.	.	.	.	.	.	.	.	.	.	.	.	.	.	99.88;99.88	.	.	.	.	.	.	.	.	.
GCA_016471315.1_PDT000899230.1	10	.	.	.	.	.	.	.	.	.	.	100.00;96.44	.	.	.	.	.	.	.	.	.	.	.	.	.	.	.	.	.	.	.	.	.	.	.	.	73.15;82.51;82.51	.	.	.	.	.	.	.	.	.	.	.	.
GCA_016471335.1_PDT000899229.1	14	.	.	.	.	.	.	.	.	.	.	100.00;96.44	.	.	.	.	.	.	.	.	.	.	.	.	.	.	.	.	.	.	.	.	.	.	.	.	82.51;82.51;82.51	.	.	99.88;99.88	.	.	.	.	.	.	.	.	100.00;100.00
GCA_016471355.1_PDT000899228.1	11	.	.	.	.	.	.	.	.	.	.	100.00;100.00	.	.	.	.	.	.	.	.	.	.	.	.	.	.	.	.	.	.	.	.	.	.	.	.	82.51;82.51	.	.	.	.	.	.	.	.	.	.	.	.
GCA_016471395.1_PDT000899214.1	10	.	.	.	.	.	.	.	.	.	.	.	.	.	.	.	.	.	.	.	.	.	.	.	.	.	.	.	.	.	.	.	.	.	.	.	.	.	.	99.88;99.88	.	.	.	.	.	.	.	.	.
GCA_016471415.1_PDT000899220.1	10	.	.	.	.	.	.	.	.	.	.	.	.	.	.	.	.	.	.	.	.	.	.	.	.	.	.	.	.	.	.	100.00;100.00	.	.	.	.	.	.	.	.	.	.	.	.	.	.	.	.	.
GCA_016471435.1_PDT000899227.1	11	.	.	.	.	.	.	.	.	.	.	.	.	.	.	.	.	.	.	.	.	.	.	.	.	.	.	.	.	.	.	100.00;100.00	.	.	.	.	.	.	.	.	.	.	.	.	.	.	.	.	.
GCA_016471455.1_PDT000899211.1	12	.	.	.	.	.	.	.	.	.	.	.	.	.	.	.	.	.	.	.	.	.	.	.	.	.	.	.	.	.	.	100.00;100.00	.	.	.	.	.	.	.	99.88;99.88	.	.	.	.	.	.	.	.	.
GCA_016471475.1_PDT000899219.1	15	.	.	.	.	.	.	.	.	.	.	88.76;96.44	.	.	.	.	.	.	.	.	.	.	.	.	.	.	87.50	.	.	.	.	.	.	.	.	.	82.51;82.51	.	.	99.88;99.88	.	.	.	.	.	.	.	.	100.00;100.00
GCA_016471495.1_PDT000899208.1	14	.	.	.	.	.	.	.	.	.	.	100.00;96.44	.	.	.	.	.	.	.	.	.	.	.	.	.	.	.	.	.	.	.	.	.	.	.	.	78.09;82.51;82.51	.	.	99.88;99.88	.	.	.	.	.	.	.	.	100.00;100.00
GCA_016471515.1_PDT000899210.1	11	.	.	.	.	.	.	.	.	.	.	.	.	.	.	.	.	.	.	.	.	.	.	.	.	.	.	.	.	.	.	.	.	.	.	.	.	.	.	99.88;99.88	.	.	.	.	.	.	.	.	.
GCA_016471535.1_PDT000899206.1	14	.	.	.	.	.	.	.	.	.	.	100.00;96.44	.	.	.	.	.	.	.	.	.	.	.	.	.	.	.	.	.	.	.	.	.	.	.	.	82.51;82.51;82.51	.	.	99.88;99.88	.	.	.	.	.	.	.	.	100.00;100.00
GCA_016471555.1_PDT000899207.1	14	.	.	.	.	.	.	.	.	.	.	100.00;96.44	.	.	.	.	.	.	.	.	.	.	.	.	.	.	.	.	.	.	.	.	.	.	.	.	73.15;82.51;82.51	.	.	99.88;99.88	.	.	.	.	.	.	.	.	100.00;100.00
GCA_016471575.1_PDT000899209.1	11	.	.	.	.	.	.	.	.	.	.	.	.	.	.	.	.	.	.	.	.	.	.	.	.	.	.	.	.	.	.	.	.	.	.	.	.	.	.	99.88;99.88	.	.	.	.	.	.	.	.	.
GCA_016471595.1_PDT000899204.1	6	.	.	.	.	.	.	.	.	.	.	.	.	.	.	.	.	.	.	.	.	.	.	.	.	.	.	.	.	.	.	.	.	.	.	.	.	.	.	.	.	.	.	.	.	.	.	.	.
GCA_016471615.1_PDT000899205.1	11	.	.	.	.	.	.	.	.	.	.	.	.	.	.	.	.	.	.	.	.	.	.	.	.	.	.	.	.	.	.	.	.	.	.	.	.	.	.	99.88;99.88	.	.	.	.	.	.	.	.	.
GCA_016471635.1_PDT000899162.1	8	.	.	.	.	.	.	.	.	.	.	100.00;100.00	.	.	.	.	.	.	.	.	.	.	.	.	.	.	.	.	.	.	.	.	.	.	.	.	.	.	.	99.88;99.88	.	.	.	.	.	.	.	.	.
GCA_016471655.1_PDT000899163.1	11	.	.	.	.	.	.	.	.	.	.	100.00;96.44	.	.	.	.	.	.	.	.	.	.	.	.	.	.	87.50	.	.	.	.	.	.	.	.	.	82.51;82.51	.	.	.	.	.	.	.	.	.	.	.	.
GCA_016471675.1_PDT000899194.1	14	.	.	.	.	.	.	.	.	.	.	100.00;96.44	.	.	.	.	.	.	.	.	.	.	.	.	.	.	.	.	.	.	.	.	.	.	.	.	73.15;82.51;82.51	.	.	99.88;99.88	.	.	.	.	.	.	.	.	100.00;100.00
GCA_016471695.1_PDT000899169.1	7	.	.	.	.	.	.	.	.	.	.	.	.	.	.	.	.	.	.	.	.	.	.	.	.	.	.	.	.	.	.	.	.	.	.	.	.	.	.	99.88;99.88	.	.	.	.	.	.	.	.	.
GCA_016471715.1_PDT000899192.1	13	.	.	.	.	.	.	.	.	.	.	100.00;96.44	.	.	.	.	.	.	.	.	.	.	.	.	.	.	.	.	.	.	.	.	.	.	.	.	73.15;82.51;82.51	.	.	99.88;99.88	.	.	.	.	.	.	.	.	100.00;100.00
GCA_016471735.1_PDT000899202.1	11	.	.	.	.	.	.	.	.	.	.	.	.	.	.	.	.	.	.	.	.	.	.	.	.	.	.	.	.	.	.	.	.	.	.	.	82.51;82.51	.	.	99.88;99.88	.	.	.	.	.	.	.	.	100.00;100.00
GCA_016471755.1_PDT000899158.1	11	.	.	.	.	.	.	.	.	.	.	.	.	.	.	.	.	.	.	.	.	.	.	.	.	.	.	.	.	.	.	.	.	.	.	.	.	.	.	99.88;99.88	.	.	.	.	.	.	.	.	.
GCA_016471775.1_PDT000899201.1	10	.	.	.	.	.	.	.	.	.	.	100.00;100.00	.	.	.	.	.	.	.	.	.	.	.	.	.	.	.	.	.	.	.	.	.	.	.	.	82.51;82.51	.	.	.	.	.	.	.	.	.	.	.	.
GCA_016471795.1_PDT000899199.1	11	.	.	.	.	.	.	.	.	.	.	.	.	.	.	.	.	.	.	.	.	.	.	.	.	.	.	.	.	.	.	.	.	.	.	.	.	.	.	99.88;99.88	.	.	.	.	.	.	.	.	.
GCA_016471815.1_PDT000899195.1	12	.	.	.	.	.	.	.	.	.	.	.	.	.	.	.	.	.	.	.	.	.	.	.	.	.	.	.	.	.	.	100.00;100.00	.	.	.	.	.	.	.	.	.	.	.	.	.	.	.	.	.
GCA_016471835.1_PDT000899151.1	6	.	.	.	.	.	.	.	.	.	.	.	.	.	.	.	.	.	.	.	.	.	.	.	.	.	.	.	.	.	.	.	.	.	.	.	.	.	.	99.88;99.88	.	.	.	.	.	.	.	.	.
GCA_016471855.1_PDT000899149.1	12	.	.	.	.	.	.	.	.	.	.	.	.	.	.	.	.	.	.	.	.	.	.	.	.	.	.	.	.	.	.	.	.	.	.	.	82.51;82.51	.	.	99.88;99.88	.	.	.	.	.	.	.	.	100.00;100.00
GCA_016471875.1_PDT000899148.1	12	.	.	.	.	.	.	.	.	.	.	.	.	.	.	.	.	.	.	.	.	.	.	.	.	.	.	.	.	.	.	.	.	.	.	.	82.51;82.51	.	.	99.88;99.88	.	.	.	.	.	.	.	.	100.00;100.00
GCA_016471885.1_PDT000899144.1	7	.	.	.	.	.	.	.	.	.	.	.	.	.	.	100.00;100.00	.	.	.	.	.	.	.	.	.	.	.	.	.	.	.	.	.	.	.	.	.	.	.	.	.	.	.	.	.	.	.	.	.
GCA_016471895.1_PDT000899150.1	11	.	.	.	.	.	.	.	.	.	.	.	.	.	.	.	.	.	.	.	.	.	.	.	.	.	.	.	.	.	.	.	.	.	.	.	.	.	.	99.88;99.88	.	.	.	.	.	.	.	.	.
GCA_016471915.1_PDT000899147.1	11	.	.	.	.	.	.	.	.	.	.	100.00;100.00	.	.	.	.	.	.	.	.	.	.	.	.	.	.	.	.	.	.	.	.	.	.	.	.	82.51;82.51	.	.	.	.	.	.	.	.	.	.	.	.
GCA_016471955.1_PDT000899136.1	8	.	.	.	.	.	.	.	.	.	.	100.00;100.00	.	.	.	.	.	.	.	.	.	.	.	.	.	.	.	.	.	.	.	.	.	.	.	.	.	.	.	99.88;99.88	.	.	.	.	.	.	.	.	.
GCA_016471975.1_PDT000899129.1	11	.	.	.	.	.	.	.	.	.	.	.	.	.	.	.	.	.	.	.	.	.	.	.	.	.	.	.	.	.	.	.	.	.	.	.	.	.	.	99.88;99.88	.	.	.	.	.	.	.	.	.
GCA_016471995.1_PDT000899121.1	11	.	.	.	.	.	.	.	.	.	.	.	.	.	.	.	.	.	.	.	.	.	.	.	.	.	.	.	.	.	.	.	.	.	.	.	.	.	.	99.88;99.88	.	.	.	.	.	.	.	.	.
GCA_016472015.1_PDT000899120.1	7	.	.	.	.	.	.	.	.	.	.	.	.	.	.	.	.	.	.	.	.	.	.	.	.	.	.	.	.	.	.	.	.	.	.	.	.	.	.	99.88;99.88	.	.	.	.	.	.	.	.	.
GCA_016472035.1_PDT000899125.1	10	.	.	.	.	.	.	.	.	.	.	.	.	.	.	100.00;100.00	.	.	.	.	.	.	.	.	.	.	.	.	.	.	.	100.00;100.00	.	.	.	.	.	.	.	.	.	.	.	.	.	.	.	.	100.00;100.00
GCA_016472055.1_PDT000899118.1	4	.	.	.	.	.	.	.	.	.	.	.	.	.	.	.	.	.	.	.	.	.	.	.	.	.	.	.	.	.	.	.	.	.	.	.	.	.	.	.	.	.	.	.	.	.	.	.	.
GCA_016472075.1_PDT000899114.1	9	.	.	.	.	.	.	.	.	.	.	89.33;97.00	.	.	100.00;100.00	.	.	.	.	.	.	.	.	.	.	.	.	.	.	.	.	.	.	.	.	.	.	.	.	99.88;99.88	.	.	.	.	.	.	.	.	.
GCA_016472095.1_PDT000899111.1	11	.	.	.	.	.	.	.	.	.	.	.	.	.	.	.	.	.	.	.	.	.	.	.	.	.	.	.	.	.	.	.	.	.	.	.	82.51;82.51	.	.	99.88;99.88	.	.	.	.	.	.	.	.	100.00;100.00
GCA_016472115.1_PDT000899116.1	7	.	.	.	.	.	.	.	.	.	.	.	.	.	.	.	.	.	.	.	.	.	.	.	.	.	.	.	.	.	.	.	.	.	.	.	.	.	.	.	.	.	.	.	.	.	.	.	.
GCA_016472135.1_PDT000899117.1	11	.	.	.	.	.	.	.	.	.	.	.	.	.	.	.	.	.	.	.	.	.	.	.	.	.	.	.	.	.	.	.	.	.	.	.	.	.	.	99.88;99.88	.	.	.	.	.	.	.	.	.
GCA_016472155.1_PDT000899112.1	11	.	.	.	.	.	.	.	.	.	.	.	.	.	.	.	.	.	.	.	.	.	.	.	.	.	.	.	.	.	.	.	.	.	.	.	.	.	.	99.88;99.88	.	.	.	.	.	.	.	.	.
GCA_016472175.1_PDT000899090.1	11	.	.	.	.	.	.	.	.	.	.	.	.	.	.	.	.	.	.	.	.	.	.	.	.	.	.	.	.	.	.	.	.	.	.	.	.	.	.	99.88;99.88	.	.	.	.	.	.	.	.	.
GCA_016472195.1_PDT000899096.1	12	.	.	.	.	.	.	.	.	.	.	.	.	.	.	.	.	.	.	.	.	.	.	.	.	.	.	.	.	.	.	100.00;100.00	.	.	.	.	.	.	.	.	.	.	.	.	.	.	.	.	.
GCA_016472215.1_PDT000899093.1	9	.	.	.	.	.	.	.	.	.	.	89.33;97.00	.	.	100.00;100.00	.	.	.	.	.	.	.	.	.	.	.	.	.	.	.	.	.	.	.	.	.	.	.	.	99.88;99.88	.	.	.	.	.	.	.	.	.
GCA_016472235.1_PDT000899110.1	11	.	.	.	.	.	.	.	.	.	.	.	.	.	.	.	.	.	.	.	.	.	.	.	.	.	.	.	.	.	.	.	.	.	.	.	.	.	.	99.88;99.88	.	.	.	.	.	.	.	.	.
GCA_016472255.1_PDT000899091.1	4	.	.	.	.	.	.	.	.	.	.	.	.	.	.	.	.	.	.	.	.	.	.	.	.	.	.	.	.	.	.	.	.	.	.	.	.	.	.	.	.	.	.	.	.	.	.	.	.
GCA_016472275.1_PDT000899077.1	11	.	.	.	.	.	.	.	.	.	.	.	.	.	.	.	.	.	.	.	.	.	.	.	.	.	.	.	.	.	.	.	.	.	.	.	.	.	.	99.88;99.88	.	.	.	.	.	.	.	.	.
GCA_016472295.1_PDT000899088.1	12	.	.	.	.	.	.	.	.	.	.	.	.	.	.	.	.	96.86;96.86	.	.	.	.	.	.	.	.	.	.	.	.	.	.	.	.	.	.	82.51;82.51	.	.	99.88;99.88	.	.	.	.	.	.	.	.	100.00;100.00
GCA_016472315.1_PDT000899078.1	12	.	.	.	.	.	.	.	.	.	.	.	.	.	.	.	.	.	.	.	.	.	.	.	.	.	.	.	.	.	.	100.00;100.00	.	.	.	.	.	.	.	.	.	.	.	.	.	.	.	.	.
GCA_016472335.1_PDT000899072.1	7	.	.	.	.	.	.	.	.	.	.	.	.	.	.	.	.	.	.	.	.	.	.	.	.	.	.	.	.	.	.	.	.	.	.	.	.	.	.	99.88;99.88	.	.	.	.	.	.	.	.	.
GCA_016472355.1_PDT000899082.1	11	.	.	.	.	.	.	.	.	.	.	.	.	.	.	.	.	.	.	.	.	.	.	.	.	.	.	.	.	.	.	.	.	.	.	.	.	.	.	99.88;99.88	.	.	.	.	.	.	.	.	.
GCA_016472375.1_PDT000899040.1	11	.	.	.	.	.	.	.	.	.	.	100.00;100.00	.	.	.	.	.	.	.	.	.	.	.	.	.	.	.	.	.	.	.	.	.	.	.	.	82.51;82.51	.	.	.	.	.	.	.	.	.	.	.	.
GCA_016472395.1_PDT000899068.1	10	.	.	.	.	.	.	.	.	.	.	.	.	.	.	100.00;100.00	.	.	.	.	.	.	.	.	.	.	.	.	.	.	.	100.00;100.00	.	.	.	.	.	.	.	.	.	.	.	.	.	.	.	.	100.00;100.00
GCA_016472415.1_PDT000899066.1	8	.	.	.	.	.	.	.	.	.	.	.	.	.	.	.	.	.	.	.	.	.	.	.	.	.	.	.	.	.	.	.	.	.	.	.	.	.	.	.	.	.	.	.	.	.	.	.	.
GCA_016472435.1_PDT000899067.1	10	.	.	.	.	.	.	.	.	.	.	.	.	.	.	100.00;100.00	.	.	.	.	.	.	.	.	.	.	.	.	.	.	.	100.00;100.00	.	.	.	.	.	.	.	.	.	.	.	.	.	.	.	.	100.00;100.00
GCA_016472455.1_PDT000899047.1	11	.	.	.	.	.	.	.	.	.	.	100.00;100.00	.	.	.	.	.	.	.	.	.	.	.	.	.	.	.	.	.	.	.	.	.	.	.	.	82.51;82.51	.	.	.	.	.	.	.	.	.	.	.	.
GCA_016472475.1_PDT000899026.1	10	.	.	.	.	.	.	.	.	.	.	.	.	.	.	100.00;100.00	.	.	.	.	.	.	.	.	.	.	.	.	.	.	.	100.00;100.00	.	.	.	.	.	.	.	.	.	.	.	.	.	.	.	.	100.00;100.00
GCA_016472495.1_PDT000898430.1	15	.	.	.	.	.	.	.	.	.	.	100.00;100.00	.	.	.	.	.	.	.	.	.	.	.	.	.	.	.	.	.	.	.	.	.	.	.	.	82.51;82.20	.	.	99.88;99.88	.	.	.	.	.	.	.	.	100.00;100.00
GCA_016472505.1_PDT000898429.1	11	.	.	.	.	.	.	.	.	.	.	.	.	.	.	.	.	.	.	.	.	.	.	.	.	.	.	.	.	.	.	.	.	.	.	.	.	.	.	99.88;99.88	.	.	.	.	.	.	.	.	.
GCA_016472535.1_PDT000898516.1	7	.	.	.	.	.	.	.	.	.	.	.	.	.	.	.	.	.	.	.	.	.	.	.	.	.	.	.	.	.	.	.	.	.	.	.	.	.	.	.	.	.	.	.	.	.	.	.	.
GCA_016472555.1_PDT000898324.1	11	.	.	.	.	.	.	.	.	.	.	.	.	.	.	.	.	.	.	.	.	.	.	.	.	.	.	.	.	.	.	.	.	.	.	.	.	.	.	99.88;99.88	.	.	.	.	.	.	.	.	.
GCA_016472575.1_PDT000898432.1	15	.	.	.	.	.	.	.	.	.	.	.	.	.	.	.	.	.	.	.	.	.	.	.	.	.	.	.	.	.	.	100.00;100.00	.	.	.	.	.	.	.	99.88;99.88	.	.	.	.	.	.	.	.	.
GCA_016472595.1_PDT000898322.1	11	.	.	.	.	.	.	.	.	.	.	.	.	.	.	.	.	.	.	.	.	.	.	.	.	.	.	.	.	.	.	.	.	.	.	.	.	.	.	99.88;99.88	.	.	.	.	.	.	.	.	.
GCA_016472615.1_PDT000898323.1	11	.	.	.	.	.	.	.	.	.	.	.	.	.	.	.	.	.	.	.	.	.	.	.	.	.	.	.	.	.	.	.	.	.	.	.	.	.	.	99.88;99.88	.	.	.	.	.	.	.	.	.
GCA_016472635.1_PDT000898321.1	7	.	.	.	.	.	.	.	.	.	.	.	.	.	.	.	.	.	.	.	.	.	.	.	.	.	.	.	.	.	.	.	.	.	.	.	.	.	.	.	.	.	.	.	.	.	.	.	.
GCA_016472655.1_PDT000898320.1	11	.	.	.	.	.	.	.	.	.	.	.	.	.	.	.	.	.	.	.	.	.	.	.	.	.	.	.	.	.	.	.	.	.	.	.	.	.	.	99.88;99.88	.	.	.	.	.	.	.	.	.
GCA_016472675.1_PDT000898456.1	11	.	.	.	.	.	.	.	.	.	.	.	.	.	.	.	.	.	.	.	.	.	.	.	.	.	.	.	.	.	.	.	.	.	.	.	.	.	.	99.88;99.88	.	.	.	.	.	.	.	.	.
GCA_016472695.1_PDT000897753.1	12	.	.	.	.	.	.	.	.	.	.	.	.	.	.	.	.	.	.	.	.	.	.	.	.	.	.	.	.	.	.	100.00;100.00	.	.	.	.	.	.	.	.	.	.	.	.	.	.	.	.	.
GCA_016472715.1_PDT000897989.1	11	.	.	.	.	.	.	.	.	.	.	.	.	.	.	.	.	.	.	.	.	.	.	.	.	.	.	.	.	.	.	.	.	.	.	.	.	.	.	99.88;99.88	.	.	.	.	.	.	.	.	.
GCA_016472735.1_PDT000897746.1	13	.	.	.	.	.	.	.	.	.	.	.	.	.	.	.	.	.	.	.	.	.	.	.	.	.	.	.	.	.	.	.	.	.	.	.	.	.	.	99.88;99.88	.	.	.	.	.	.	.	.	100.00;100.00
GCA_016472755.1_PDT000897752.1	10	.	.	.	.	.	.	.	.	.	.	.	.	.	.	.	.	.	.	.	.	.	.	.	.	.	.	.	.	.	.	100.00;100.00	.	.	.	.	.	.	.	.	.	.	.	.	.	.	.	.	.
GCA_016472765.1_PDT000897738.1	11	.	.	.	.	.	.	.	.	.	.	.	.	.	.	.	.	.	.	.	.	.	.	.	.	.	.	.	.	.	.	.	.	.	.	.	.	.	.	99.88;99.88	.	.	.	.	.	.	.	.	.
GCA_016472795.1_PDT000898143.1	11	.	.	.	.	.	.	.	.	.	.	.	.	.	.	.	.	.	.	.	.	.	.	.	.	.	.	.	.	.	.	.	.	.	.	.	.	.	.	99.88;99.88	.	.	.	.	.	.	.	.	.
GCA_016472815.1_PDT000897997.1	12	.	.	.	.	.	.	.	.	.	.	.	.	.	.	.	.	.	.	.	.	.	.	.	.	.	.	.	.	.	.	100.00;100.00	.	.	.	.	.	.	.	.	.	.	.	.	.	.	.	.	.
GCA_016472835.1_PDT000897990.1	4	.	.	.	.	.	.	.	.	.	.	.	.	.	.	.	.	.	.	.	.	.	.	.	.	.	.	.	.	.	.	.	.	.	.	.	.	.	.	.	.	.	.	.	.	.	.	.	.
GCA_016472855.1_PDT000897580.1	12	.	.	.	.	.	.	.	.	.	.	.	.	.	.	.	.	.	.	.	.	.	.	.	.	.	.	.	.	.	.	100.00;100.00	.	.	.	.	.	.	.	.	.	.	.	.	.	.	.	.	.
GCA_016472875.1_PDT000897735.1	11	.	.	.	.	.	.	.	.	.	.	.	.	.	.	.	.	.	.	.	.	.	.	.	.	.	.	.	.	.	.	.	.	.	.	.	82.51;82.51	.	.	99.88;99.88	.	.	.	.	.	.	.	.	100.00;100.00
GCA_016472895.1_PDT000897579.1	11	.	.	.	.	.	.	.	.	.	.	.	.	.	.	.	.	.	.	.	.	.	.	.	.	.	.	.	.	.	.	.	.	.	.	.	.	.	.	99.88;99.88	.	.	.	.	.	.	.	.	.
GCA_016472915.1_PDT000897569.1	16	.	.	.	.	.	.	.	.	.	.	100.00;100.00	.	.	.	.	.	.	.	.	.	.	.	.	.	.	.	.	.	.	.	.	.	.	.	.	82.51;82.20	.	.	99.88;99.88	.	.	.	.	.	.	.	.	100.00;100.00
GCA_016472935.1_PDT000897567.1	11	.	.	.	.	.	.	.	.	.	.	.	.	.	.	.	.	.	.	.	.	.	.	.	.	.	.	.	.	.	.	.	.	.	.	.	.	.	.	99.88;99.88	.	.	.	.	.	.	.	.	.
GCA_016472955.1_PDT000897578.1	6	.	.	.	.	.	.	.	.	.	.	.	.	.	.	.	.	.	.	.	.	.	.	.	.	.	.	.	.	.	.	.	.	.	.	.	.	.	.	.	.	.	.	.	.	.	.	.	.
GCA_016472975.1_PDT000897589.1	11	.	.	.	.	.	.	.	.	.	.	.	.	.	.	.	.	.	.	.	.	.	.	.	.	.	.	.	.	.	.	.	.	.	.	.	.	.	.	99.88;99.88	.	.	.	.	.	.	.	.	.
GCA_016472995.1_PDT000897577.1	7	.	.	.	.	.	.	.	.	.	.	.	.	.	.	.	.	.	.	.	.	.	.	.	.	.	.	.	.	.	.	.	.	.	.	.	.	.	.	99.88;99.88	.	.	.	.	.	.	.	.	.
GCA_016473015.1_PDT000897568.1	10	.	.	.	.	.	.	.	.	.	.	.	.	.	.	.	.	.	.	.	.	.	.	.	.	.	.	.	.	.	.	100.00;100.00	.	.	.	.	.	.	.	.	.	.	.	.	.	.	.	.	.
GCA_016473035.1_PDT000897734.1	7	.	.	.	.	.	.	.	.	.	.	.	.	.	.	.	.	.	.	.	.	.	.	.	.	.	.	.	.	.	.	.	.	.	.	.	.	.	.	99.88;99.88	.	.	.	.	.	.	.	.	.
GCA_016473045.1_PDT000897566.1	11	.	.	.	.	.	.	.	.	.	.	.	.	.	.	.	.	.	.	.	.	.	.	.	.	.	.	.	.	.	.	.	.	.	.	.	.	.	.	99.88;99.88;99.88	.	.	.	.	.	.	.	.	.
GCA_016473075.1_PDT000897565.1	12	.	.	.	.	.	.	.	.	.	.	.	.	.	.	.	.	.	.	.	.	.	.	.	.	.	.	.	.	.	.	.	.	.	.	.	.	.	.	99.88;99.88	.	.	.	.	.	.	.	.	100.00;100.00
GCA_016473095.1_PDT000897559.1	11	.	.	.	.	.	.	.	.	.	.	.	.	.	.	.	.	.	.	.	.	.	.	.	.	.	.	.	.	.	.	.	.	.	.	.	.	.	.	99.88;99.88	.	.	.	.	.	.	.	.	.
GCA_016473115.1_PDT000897557.1	11	.	.	.	.	.	.	.	.	.	.	.	.	.	.	.	.	.	.	.	.	.	.	.	.	.	.	.	.	.	.	.	.	.	.	.	.	.	.	99.88;99.88	.	.	.	.	.	.	.	.	.
GCA_016473135.1_PDT000897560.1	11	.	.	.	.	.	.	.	.	.	.	.	.	.	.	.	.	.	.	.	.	.	.	.	.	.	.	.	.	.	.	.	.	.	.	.	.	.	.	99.88;99.88	.	.	.	.	.	.	.	.	.
GCA_016473155.1_PDT000897558.1	15	.	.	.	.	.	.	.	.	.	.	.	.	.	.	.	.	.	.	.	.	.	.	.	.	.	.	.	.	.	.	100.00;100.00	.	.	.	.	.	.	.	99.88;99.88	.	.	.	.	.	.	.	.	.
GCA_016473175.1_PDT000897564.1	12	.	.	.	.	.	.	.	.	.	.	.	.	.	.	.	.	.	.	.	.	.	.	.	.	.	.	.	.	.	.	.	.	.	.	.	.	.	.	99.88;99.88	.	.	.	.	.	.	.	.	100.00;100.00
GCA_016473195.1_PDT000897561.1	11	.	.	.	.	.	.	.	.	.	.	.	.	.	.	.	.	.	.	.	.	.	.	.	.	.	.	.	.	.	.	.	.	.	.	.	.	.	.	99.88;99.88	.	.	.	.	.	.	.	.	.
GCA_016473215.1_PDT000897562.1	12	.	.	.	.	.	.	.	.	.	.	.	.	.	.	.	.	.	.	.	.	.	.	.	.	.	.	.	.	.	.	.	.	.	.	.	.	.	.	99.88;99.88	.	.	.	.	.	.	.	.	100.00;100.00
GCA_016473235.1_PDT000897554.1	15	.	.	.	.	.	.	.	.	.	.	.	.	.	.	.	.	.	.	.	.	.	.	.	.	.	.	.	.	.	.	100.00;100.00	.	.	.	.	.	.	.	99.88;99.88	.	.	.	.	.	.	.	.	.
GCA_016473255.1_PDT000897563.1	15	.	.	.	.	.	.	.	.	.	.	.	.	.	.	.	.	.	.	.	.	.	.	.	.	.	.	.	.	.	.	100.00;100.00	.	.	.	.	.	.	.	99.88;99.88	.	.	.	.	.	.	.	.	.
GCA_016473275.1_PDT000897555.1	15	.	.	.	.	.	.	.	.	.	.	.	.	.	.	.	.	.	.	.	.	.	.	.	.	.	.	.	.	.	.	100.00;100.00	.	.	.	.	.	.	.	99.88;99.88	.	.	.	.	.	.	.	.	.
GCA_016473295.1_PDT000897553.1	11	.	.	.	.	.	.	.	.	.	.	.	.	.	.	.	.	.	.	.	.	.	.	.	.	.	.	.	.	.	.	.	.	.	.	.	.	.	.	99.88;99.88	.	.	.	.	.	.	.	.	.
GCA_016473315.1_PDT000893905.1	10	.	.	.	.	.	.	.	.	.	.	.	.	.	.	.	.	.	.	.	.	.	.	.	.	.	.	.	.	.	.	.	.	.	.	.	.	.	.	.	.	.	.	.	.	.	.	.	87.01;87.62
GCA_016473335.1_PDT000893902.1	13	.	.	.	.	.	.	.	.	.	.	.	.	.	100.00;100.00	.	.	.	.	.	.	.	.	.	.	.	.	.	.	.	.	.	.	.	.	.	.	.	.	99.88;99.88	.	.	.	.	.	.	.	.	.
GCA_016473355.1_PDT000893786.1	12	.	.	.	.	.	.	.	.	.	.	.	.	.	.	.	.	.	.	.	.	.	.	.	.	.	.	.	.	.	.	100.00;100.00	.	.	.	.	.	.	.	.	.	.	.	.	.	.	.	.	.
GCA_016473375.1_PDT000893900.1	10	.	.	.	.	.	.	.	.	.	.	.	.	.	.	.	.	.	.	.	.	.	.	.	.	.	.	.	.	.	.	.	100.00;100.00	.	.	.	.	.	.	99.88;99.88	.	.	.	.	.	.	.	.	100.00;100.00
GCA_016473385.1_PDT000893904.1	10	.	.	.	.	.	.	.	.	.	.	.	.	.	.	.	.	.	.	.	.	.	.	.	.	.	.	.	.	.	.	.	100.00;100.00;100.00	.	.	.	.	.	.	99.88;99.88;99.88	.	.	.	.	.	.	.	.	100.00;100.00
GCA_016473415.1_PDT000897255.1	11	.	.	.	.	.	.	.	.	.	.	.	.	.	.	.	.	.	.	.	.	.	.	.	.	.	.	.	.	.	.	.	.	.	.	.	.	.	.	99.88;99.88	.	.	.	.	.	.	.	.	.
GCA_016473435.1_PDT000897552.1	11	.	.	.	.	.	.	.	.	.	.	.	.	.	.	.	.	.	.	.	.	.	.	.	.	.	.	.	.	.	.	.	.	.	.	.	.	.	.	99.88;99.88	.	.	.	.	.	.	.	.	.
GCA_016473455.1_PDT000897254.1	15	.	.	.	.	.	.	.	.	.	.	.	.	.	.	.	.	.	.	.	.	.	.	.	.	.	.	.	.	.	.	100.00;100.00	.	.	.	.	.	.	.	99.88;99.88	.	.	.	.	.	.	.	.	.
GCA_016473475.1_PDT000893785.1	12	.	.	.	.	.	.	.	.	.	.	.	.	.	.	.	.	.	.	.	.	.	.	.	.	.	.	.	.	.	.	100.00;100.00	.	.	.	.	.	.	.	.	.	.	.	.	.	.	.	.	.
GCA_016473495.1_PDT000897253.1	15	.	.	.	.	.	.	.	.	.	.	.	.	.	.	.	.	.	.	.	.	.	.	.	.	.	.	.	.	.	.	100.00;100.00	.	.	.	.	.	.	.	99.88;99.88	.	.	.	.	.	.	.	.	.
GCA_016473515.1_PDT000893764.1	13	.	.	.	.	.	.	.	.	.	.	.	.	.	.	.	.	.	.	.	.	.	.	.	.	.	.	.	.	.	.	100.00;100.00	.	.	.	.	.	.	.	99.88;99.88	.	.	.	.	.	.	.	.	.
GCA_016473535.1_PDT000893783.1	7	.	.	.	.	.	.	.	.	.	.	.	.	.	.	.	.	.	.	.	.	.	.	.	.	.	.	.	.	.	.	.	.	.	.	.	.	.	.	.	.	.	.	.	.	.	.	.	.
GCA_016473555.1_PDT000893765.1	10	.	.	.	.	.	.	.	.	.	.	.	.	.	.	.	.	.	.	.	.	.	.	.	.	.	.	.	.	.	.	.	.	.	.	.	82.51;82.51	.	.	99.88;99.88	.	.	.	.	.	.	.	.	.
GCA_016473575.1_PDT000893766.1	11	.	.	.	.	.	.	.	.	.	.	.	.	.	.	.	.	.	.	.	.	.	.	.	.	.	.	.	.	.	.	.	.	.	.	.	82.51;82.51	.	.	99.88;99.88	.	.	.	.	.	.	.	.	100.00;100.00
GCA_016473595.1_PDT000893784.1	7	.	.	.	.	.	.	.	.	.	.	.	.	.	.	.	.	.	.	.	.	.	.	.	.	.	.	.	.	.	.	.	.	.	.	.	.	.	.	.	.	.	.	.	.	.	.	.	.
GCA_016473615.1_PDT000893763.1	10	.	.	.	.	.	.	.	.	.	.	.	.	.	.	.	.	.	.	.	.	.	.	.	.	.	.	.	.	.	.	100.00;100.00	.	.	.	.	.	.	.	.	.	.	.	.	.	.	.	.	.
GCA_016473635.1_PDT000893748.1	10	.	.	.	.	.	.	.	.	.	.	.	.	.	.	.	.	.	.	.	.	.	.	.	.	.	.	.	.	.	.	.	.	.	.	.	82.51;82.51	.	.	99.88;99.88	.	.	.	.	.	.	.	.	.
GCA_016473655.1_PDT000893767.1	7	.	.	.	.	.	.	.	.	.	.	.	.	.	.	.	.	.	.	.	.	.	.	.	.	.	.	.	.	.	.	.	.	.	.	.	.	.	.	.	.	.	.	.	.	.	.	.	.
GCA_016473675.1_PDT000893725.1	6	.	.	.	.	.	.	.	.	.	.	.	.	.	.	.	.	.	.	.	.	.	.	.	.	.	.	.	.	.	.	.	.	.	.	.	.	.	.	99.88;99.88	.	.	.	.	.	.	.	.	.
GCA_016473695.1_PDT000893755.1	11	.	.	.	.	.	.	.	.	.	.	.	.	.	.	.	.	.	.	.	.	.	.	.	.	.	.	.	.	.	.	.	.	.	.	.	82.51;82.51	.	.	99.88;99.88	.	.	.	.	.	.	.	.	100.00;100.00
GCA_016473715.1_PDT000893718.1	11	.	.	.	.	.	.	.	.	.	.	89.33;97.00	.	.	100.00;100.00	.	.	.	.	.	.	.	.	.	.	.	.	.	.	.	.	.	.	.	.	.	.	.	.	99.88;99.88	.	.	.	.	.	.	.	.	.
GCA_016473735.1_PDT000893720.1	10	.	.	.	.	.	.	.	.	.	.	.	.	.	.	.	.	.	.	.	.	.	.	.	.	.	.	.	.	.	.	100.00;100.00	.	.	.	.	.	.	.	.	.	.	.	.	.	.	.	.	.
GCA_016473755.1_PDT000893701.1	11	.	.	.	.	.	.	.	.	.	.	.	.	.	.	.	.	.	.	.	.	.	.	.	.	.	.	.	.	.	.	.	.	.	.	.	.	.	.	99.88;99.88	.	.	.	.	.	.	.	.	.
GCA_016473775.1_PDT000893711.1	11	.	.	.	.	.	.	.	.	.	.	89.33;97.00	.	.	100.00;100.00	.	.	.	.	.	.	.	.	.	.	.	.	.	.	.	.	.	.	.	.	.	.	.	.	99.88;99.88	.	.	.	.	.	.	.	.	.
GCA_016473795.1_PDT000893666.1	8	.	.	.	.	.	.	.	.	.	.	.	.	.	.	.	.	.	.	.	.	.	.	.	.	.	.	.	.	.	.	.	.	.	.	.	.	.	.	99.88;99.88	.	.	.	.	.	.	.	.	.
GCA_016473815.1_PDT000893717.1	11	.	.	.	.	.	.	.	.	.	.	.	.	.	.	.	.	.	.	.	.	.	.	.	.	.	.	.	.	.	.	.	.	.	.	.	.	.	.	99.88;99.88	.	.	.	.	.	.	.	.	.
GCA_016473835.1_PDT000893710.1	15	.	.	.	.	.	.	.	.	.	.	100.00;96.44	.	.	.	.	.	.	.	.	.	.	.	.	.	.	87.50	.	.	.	.	.	.	.	.	.	82.51;82.51	.	.	99.88;99.88	.	.	.	.	.	.	.	.	100.00;100.00
GCA_016473855.1_PDT000893708.1	6	.	.	.	.	.	.	.	.	.	.	.	.	.	.	.	.	100.00;100.00	.	.	.	.	.	.	.	.	.	.	.	.	.	.	.	.	.	.	.	.	.	.	.	.	.	.	.	.	.	.	.
GCA_016473875.1_PDT000893707.1	15	.	.	.	.	.	.	.	.	.	.	100.00;96.44	.	.	.	.	.	.	.	.	.	.	.	.	.	.	87.50	.	.	.	.	.	.	.	.	.	82.51;82.51	.	.	99.88;99.88	.	.	.	.	.	.	.	.	100.00;100.00
GCA_016473895.1_PDT000893706.1	15	.	.	.	.	.	.	.	.	.	.	88.76;96.44	.	.	.	.	.	.	.	.	.	.	.	.	.	.	87.50	.	.	.	.	.	.	.	.	.	82.51;82.51	.	.	99.88;99.88	.	.	.	.	.	.	.	.	100.00;100.00
GCA_016473915.1_PDT000893660.1	11	.	.	.	.	.	.	.	.	.	.	100.00;100.00	.	.	.	.	.	.	.	.	.	.	.	.	.	.	.	.	.	.	.	.	.	.	.	.	82.51;82.51	.	.	.	.	.	.	.	.	.	.	.	.
GCA_016473935.1_PDT000893657.1	11	.	.	.	.	.	.	.	.	.	.	.	.	.	.	.	.	.	.	.	.	.	.	.	.	.	.	.	.	.	.	.	.	.	.	.	82.51;82.51	.	.	99.88;99.88	.	.	.	.	.	.	.	.	100.00;100.00
GCA_016473955.1_PDT000893264.1	16	.	.	.	.	.	.	100.00;100.00	.	.	.	.	.	.	.	.	.	100.00;100.00	.	.	.	.	100.00;100.00	.	.	.	.	.	.	.	.	100.00;100.00	.	.	.	.	.	.	.	.	.	.	.	.	.	.	100.00;100.00	.	.
GCA_016473975.1_PDT000893518.1	11	.	.	.	.	.	.	.	.	.	.	.	.	.	.	.	.	.	.	.	.	.	.	.	.	.	.	.	.	.	.	.	.	.	.	.	82.51;82.51	.	.	99.88;99.88	.	.	.	.	.	.	.	.	100.00;100.00
GCA_016473995.1_PDT000893651.1	8	.	.	.	.	.	.	.	.	.	.	.	.	.	.	.	.	.	.	.	.	.	.	.	.	.	.	.	.	.	.	.	.	.	.	.	.	.	.	99.88;99.88	.	.	.	.	.	.	.	.	.
GCA_016474015.1_PDT000893650.1	7	.	.	.	.	.	.	.	.	.	.	.	.	.	.	.	.	.	.	.	.	.	.	.	.	.	.	.	.	.	.	.	.	.	.	.	.	.	.	.	.	.	.	.	.	.	.	.	.
GCA_016474025.1_PDT000893523.1	11	.	.	.	.	.	.	.	.	.	.	.	.	.	.	.	.	.	.	.	.	.	.	.	.	.	.	.	.	.	.	.	.	.	.	.	82.51;82.51	.	.	99.88;99.88	.	.	.	.	.	.	.	.	100.00;100.00
GCA_016474055.1_PDT000893499.1	8	.	.	.	.	.	.	.	.	.	.	.	.	.	.	.	.	.	.	.	.	.	.	.	.	.	.	.	.	.	.	.	.	.	.	.	.	.	.	.	.	.	.	.	.	.	100.00;100.00	.	.
GCA_016474075.1_PDT000893257.1	11	.	.	.	.	.	.	.	.	.	.	.	.	.	.	.	.	.	.	.	.	.	.	.	.	.	.	.	.	.	.	.	.	.	.	.	.	.	.	99.88;99.88	.	.	.	.	.	.	.	.	.
GCA_016474095.1_PDT000893259.1	11	.	.	.	.	.	.	.	.	.	.	.	.	.	.	.	.	.	.	.	.	.	.	.	.	.	.	.	.	.	.	.	.	.	.	.	.	.	.	99.88;99.88	.	.	.	.	.	.	.	.	.
GCA_016474105.1_PDT000893494.1	9	.	.	.	.	.	.	.	.	.	.	.	.	.	.	.	.	.	.	.	.	.	.	.	.	.	.	.	.	.	.	.	.	.	.	.	.	.	.	.	.	.	.	.	.	.	.	.	.
GCA_016474135.1_PDT000893258.1	3	.	.	.	.	.	.	.	.	.	.	.	.	.	.	.	.	.	.	.	.	.	.	.	.	.	.	.	.	.	.	.	.	.	.	.	.	.	.	.	.	.	.	.	.	.	.	.	.
GCA_016474155.1_PDT000893256.1	11	.	.	.	.	.	.	.	.	.	.	.	.	.	.	.	.	.	.	.	.	.	.	.	.	.	.	.	.	.	.	.	.	.	.	.	.	.	.	99.88;99.88	.	.	.	.	.	.	.	.	.
GCA_016474175.1_PDT000893255.1	13	.	.	.	.	.	.	.	.	.	.	.	.	.	.	.	.	.	.	.	.	.	.	.	.	.	.	.	.	.	.	.	.	.	.	.	.	.	.	99.88;99.88	.	.	.	.	.	.	.	.	100.00;100.00
GCA_016474195.1_PDT000893189.1	16	.	.	.	.	.	.	.	.	.	.	.	.	.	.	.	.	.	.	.	.	.	.	.	.	.	.	.	.	.	.	.	.	.	.	.	82.51;82.51	.	.	99.88;99.88	.	.	.	.	.	.	.	.	100.00;100.00
GCA_016474215.1_PDT000893183.1	12	.	.	.	.	.	.	.	.	.	.	100.00;100.00	.	.	.	.	.	.	.	.	.	.	.	.	.	.	.	.	.	.	.	.	.	.	.	.	82.51;82.51	.	.	.	.	.	.	.	.	.	.	.	100.00;100.00
GCA_016474235.1_PDT000893188.1	15	.	.	.	.	.	.	.	.	.	.	.	.	.	.	.	.	.	.	.	.	.	.	.	.	.	.	.	.	.	.	.	.	.	.	.	82.51;82.51	.	.	99.88;99.88	.	.	.	.	.	.	.	.	100.00;100.00
GCA_016474255.1_PDT000893187.1	11	.	.	.	.	.	.	.	.	.	.	100.00;100.00	.	.	.	.	.	.	.	.	.	.	.	.	.	.	.	.	.	.	.	.	.	.	.	.	82.51;82.51	.	.	.	.	.	.	.	.	.	.	.	100.00;100.00
GCA_016474275.1_PDT000893254.1	11	.	.	.	.	.	.	.	.	.	.	.	.	.	.	.	.	.	.	.	.	.	.	.	.	.	.	.	.	.	.	.	.	.	.	.	.	.	.	99.88;99.88	.	.	.	.	.	.	.	.	.
GCA_016474295.1_PDT000893253.1	16	.	.	.	.	.	.	100.00;100.00	.	.	.	.	.	.	.	.	.	100.00;100.00	.	.	.	.	100.00;100.00	.	.	.	.	.	.	.	.	100.00;100.00	.	.	.	.	.	.	.	.	.	.	.	.	.	.	100.00;100.00	.	.
GCA_016474315.1_PDT000893192.1	9	.	.	.	.	.	.	.	.	.	.	100.00;100.00	.	.	.	.	.	.	.	.	.	.	.	.	.	.	.	.	.	.	.	.	.	.	.	.	82.51;82.51	.	.	.	.	.	.	.	.	.	.	.	100.00;100.00
GCA_016474335.1_PDT000893190.1	14	.	.	.	.	.	.	.	.	.	.	.	.	.	.	.	.	.	.	.	.	.	.	.	.	.	.	.	97.92;97.92	.	.	.	.	.	.	.	.	.	.	99.88;99.88	.	.	.	.	.	.	.	.	.
GCA_016474355.1_PDT000893191.1	16	.	.	.	.	.	.	.	.	.	.	.	.	.	.	.	.	.	.	.	.	.	.	.	.	.	.	.	.	.	.	.	.	.	.	.	82.51;82.51	.	.	99.88;99.88	.	.	.	.	.	.	.	.	100.00;100.00
GCA_016474375.1_PDT000893193.1	9	.	.	.	.	.	.	.	.	.	.	100.00;100.00	.	.	.	.	.	.	.	.	.	.	.	.	.	.	.	.	.	.	.	.	.	.	.	.	82.51;82.51	.	.	.	.	.	.	.	.	.	.	.	.
GCA_016474395.1_PDT000893186.1	14	.	.	.	.	.	.	.	.	.	.	.	.	.	.	.	.	.	.	.	.	.	.	.	.	.	.	.	97.92;97.92	.	.	.	.	.	.	.	.	.	.	99.88;99.88	.	.	.	.	.	.	.	.	.
GCA_016474415.1_PDT000893185.1	9	.	.	.	.	.	.	.	.	.	.	100.00;100.00	.	.	.	.	.	.	.	.	.	.	.	.	.	.	.	.	.	.	.	.	.	.	.	.	82.51;82.51	.	.	.	.	.	.	.	.	.	.	.	100.00;100.00
GCA_016474435.1_PDT000893179.1	9	.	.	.	.	.	.	.	.	.	.	100.00;100.00	.	.	.	.	.	.	.	.	.	.	.	.	.	.	.	.	.	.	.	.	.	.	.	.	82.51;82.51	.	.	.	.	.	.	.	.	.	.	.	100.00;100.00
GCA_016474455.1_PDT000893177.1	10	.	.	.	.	.	.	.	.	.	.	.	.	.	.	.	.	.	.	.	.	.	.	.	.	.	.	.	.	.	.	.	.	.	.	.	.	.	.	.	.	.	.	.	.	.	.	.	100.00;100.00
GCA_016474465.1_PDT000893176.1	8	.	.	.	.	.	.	.	.	.	.	.	.	.	.	.	.	.	.	.	.	.	.	.	.	.	.	.	.	.	.	.	.	.	.	.	.	.	.	.	.	.	.	.	.	.	.	.	100.00;100.00
GCA_016474495.1_PDT000893178.1	11	.	.	.	.	.	.	.	.	.	.	100.00;100.00	.	.	.	.	.	.	.	.	.	.	.	.	.	.	.	.	.	.	.	.	.	.	.	.	82.51;82.51	.	.	.	.	.	.	.	.	.	.	.	100.00;100.00
GCA_016474515.1_PDT000893180.1	9	.	.	.	.	.	.	.	.	.	.	100.00;100.00	.	.	.	.	.	.	.	.	.	.	.	.	.	.	.	.	.	.	.	.	.	.	.	.	82.51;82.51	.	.	.	.	.	.	.	.	.	.	.	.
GCA_016474535.1_PDT000893181.1	16	.	.	.	.	.	.	.	.	.	.	.	.	.	.	.	.	.	.	.	.	.	.	.	.	.	.	.	.	.	.	.	.	.	.	.	82.51;82.51	.	.	99.88;99.88;99.88	.	.	.	.	.	.	.	.	100.00;100.00
GCA_016474555.1_PDT000893182.1	9	.	.	.	.	.	.	.	.	.	.	100.00;100.00	.	.	.	.	.	.	.	.	.	.	.	.	.	.	.	.	.	.	.	.	.	.	.	.	82.51;82.51	.	.	.	.	.	.	.	.	.	.	.	100.00;100.00
GCA_016474575.1_PDT000893175.1	8	.	.	.	.	.	.	.	.	.	.	100.00;100.00	.	.	.	.	.	.	.	.	.	.	.	.	.	.	.	.	.	.	.	.	.	.	.	.	82.51;82.51	.	.	.	.	.	.	.	.	.	.	.	.
GCA_016474585.1_PDT000893174.1	16	.	.	.	.	.	.	.	.	.	.	.	.	.	.	.	.	.	.	.	.	.	.	.	.	.	.	.	.	.	.	.	.	.	.	.	82.51;82.51	.	.	99.88;99.88	.	.	.	.	.	.	.	.	100.00;100.00
GCA_016474615.1_PDT000893173.1	16	.	.	.	.	.	.	.	.	.	.	.	.	.	.	.	.	.	.	.	.	.	.	.	.	.	.	.	.	.	.	.	.	.	.	.	82.51;82.51	.	.	99.88;99.88	.	.	.	.	.	.	.	.	100.00;100.00
GCA_016474635.1_PDT000893168.1	13	.	.	.	.	.	.	.	.	.	.	.	.	.	.	.	.	.	.	.	.	.	.	.	.	.	.	.	.	.	.	.	.	.	.	.	.	.	.	99.88;99.88	.	.	.	.	.	.	.	.	100.00;100.00
GCA_016474655.1_PDT000893167.1	7	.	.	.	.	.	.	.	.	.	.	.	.	.	.	.	.	.	.	.	.	.	.	.	.	.	.	.	.	.	.	.	100.00;100.00	.	.	.	.	.	.	.	.	.	.	.	.	.	.	.	.
GCA_016474675.1_PDT000893165.1	6	.	.	.	.	.	.	.	.	.	.	.	.	.	.	.	.	.	.	.	.	.	.	.	.	.	.	.	.	.	.	.	100.00;100.00	.	.	.	.	.	.	.	.	.	.	.	.	.	.	.	.
GCA_016474695.1_PDT000893169.1	13	.	.	.	.	.	.	.	.	.	.	.	.	.	.	.	.	.	.	.	.	.	.	.	.	.	.	.	.	.	.	.	.	.	.	.	.	.	.	99.88;99.88	.	.	.	.	.	.	.	.	100.00;100.00
GCA_016474705.1_PDT000893166.1	7	.	.	.	.	.	.	.	.	.	.	.	.	.	.	.	.	.	.	.	.	.	.	.	.	.	.	.	.	.	.	.	100.00;100.00	.	.	.	.	.	.	.	.	.	.	.	.	.	.	.	.
GCA_016474735.1_PDT000893172.1	12	.	.	.	.	.	100.00;100.00;83.28	.	.	.	.	.	.	.	.	100.00;100.00	.	.	.	.	.	.	.	.	.	.	.	.	.	.	.	.	.	.	.	.	.	.	.	99.88;99.88	.	.	.	.	.	.	.	.	.
GCA_016474755.1_PDT000893161.1	8	.	.	.	.	.	.	.	.	.	.	.	.	.	.	.	.	.	.	.	.	.	.	.	.	.	.	.	.	.	.	.	.	.	.	.	.	.	.	.	100.00;100.00	.	.	.	.	.	.	.	.
GCA_016474775.1_PDT000893171.1	14	.	.	.	.	.	.	.	.	.	.	.	.	.	.	.	.	.	.	.	.	.	.	.	.	.	.	.	.	.	.	.	.	.	.	.	82.51;82.51	.	.	99.88;99.88	.	.	.	.	.	.	.	.	100.00;100.00
GCA_016474795.1_PDT000893162.1	13	.	90.24;90.24	.	.	.	.	.	.	.	100.00;100.00	.	.	.	.	.	.	.	.	.	.	.	.	.	.	.	.	.	.	.	.	100.00;100.00	.	.	.	.	.	.	.	.	.	.	.	.	.	.	.	.	.
GCA_016474815.1_PDT000892377.1	6	.	.	.	.	.	.	.	.	.	.	.	.	.	.	.	.	.	.	.	.	.	.	.	.	.	.	.	.	.	.	.	.	.	.	.	.	.	.	.	.	.	.	.	.	.	.	.	.
GCA_016474835.1_PDT000892371.1	13	.	.	.	.	.	.	.	.	.	.	.	.	.	.	.	.	.	.	.	.	.	.	.	.	.	.	.	.	.	.	.	.	.	.	.	.	.	.	99.88;99.88	.	.	.	.	.	.	.	.	100.00;100.00
GCA_016474865.1_PDT000888243.1	7	.	.	.	.	.	.	.	.	.	.	.	.	.	.	.	.	.	.	.	.	.	.	.	.	.	.	.	.	.	.	.	.	.	.	.	.	.	.	.	.	.	.	.	.	.	.	.	.
GCA_016474885.1_PDT000888238.1	10	.	.	.	.	.	.	.	.	.	.	.	.	.	.	.	.	.	.	.	.	.	.	.	.	.	.	.	.	.	.	.	.	.	.	.	.	.	.	99.88;99.88	.	.	.	.	.	.	.	.	.
GCA_016474905.1_PDT000888242.1	12	.	.	.	.	.	.	.	.	.	.	.	.	.	.	.	.	.	.	.	.	.	.	.	.	.	.	.	.	.	.	.	.	.	.	.	.	.	.	99.88;99.88	.	.	.	.	.	.	.	.	100.00;100.00
GCA_016474925.1_PDT000888241.1	12	.	.	.	.	.	.	.	.	.	.	.	.	.	.	.	.	.	.	.	.	.	.	.	.	.	.	.	.	.	.	.	.	.	.	.	.	.	.	99.88;99.88	.	.	.	.	.	.	.	.	100.00;100.00
GCA_016474945.1_PDT000888244.1	7	.	.	.	.	.	.	.	.	.	.	.	.	.	.	.	.	.	.	.	.	.	.	.	.	.	.	.	.	.	.	.	.	.	.	.	.	.	.	.	.	.	.	.	.	.	.	.	.
GCA_016474965.1_PDT000888237.1	8	.	.	.	.	.	.	.	.	.	.	.	.	.	.	100.00;100.00	.	.	.	.	.	.	.	.	.	.	.	.	.	.	.	100.00;100.00	.	.	.	.	.	.	.	.	.	.	.	.	.	.	.	.	100.00;100.00
GCA_016474995.1_PDT000891308.1	13	.	.	.	.	.	.	.	.	.	.	.	.	.	.	.	.	.	.	.	.	.	.	.	.	.	.	.	.	.	.	.	.	.	.	.	82.51;82.51	.	.	99.88;99.88	.	.	.	.	.	.	.	.	100.00;100.00
GCA_016475025.1_PDT000888245.1	9	.	.	.	.	.	.	.	.	.	.	.	.	.	.	100.00;100.00	.	.	.	.	.	.	.	.	.	.	.	.	.	.	.	100.00;100.00	.	.	.	.	.	.	.	.	.	.	.	.	.	.	.	.	100.00;100.00
GCA_016475105.1_PDT000869962.1	7	.	.	.	.	.	.	.	.	.	.	.	.	.	.	.	.	.	.	.	.	.	.	.	.	.	.	.	.	.	.	.	.	.	.	.	.	.	.	.	.	.	.	.	.	.	.	.	.
GCA_016475125.1_PDT000869963.1	12	.	.	.	.	.	.	.	.	.	.	.	.	.	.	.	.	.	.	.	.	.	.	.	.	.	.	.	.	.	.	.	.	.	.	.	.	.	.	99.88;99.88	.	.	.	.	.	.	.	.	.
GCA_016475165.1_PDT000869961.1	15	.	.	.	.	.	.	.	.	.	.	.	.	.	.	.	.	.	.	.	.	.	.	.	.	.	.	.	97.92;97.92	.	.	100.00;100.00	.	.	.	.	.	.	.	.	.	.	.	.	.	.	.	.	.
GCA_016475185.1_PDT000868671.1	11	.	.	.	.	.	.	.	.	.	.	.	.	.	100.00;100.00	.	.	.	.	.	.	.	.	.	.	.	.	.	.	.	.	.	.	.	.	.	82.51	.	.	99.88;99.88	.	.	.	.	.	.	.	.	.
GCA_016475205.1_PDT000869958.1	4	.	.	.	.	.	.	.	.	.	.	.	.	.	.	.	.	.	.	.	.	.	.	.	.	.	.	.	.	.	.	.	.	.	.	.	.	.	.	.	.	.	.	.	.	.	.	.	.
GCA_016475225.1_PDT000869960.1	12	.	.	.	.	.	.	.	.	.	.	.	.	.	.	.	.	.	.	.	.	.	.	.	.	.	.	.	.	.	.	.	.	.	.	.	.	.	.	99.88;99.88	.	.	.	.	.	.	.	.	100.00;100.00
GCA_016475245.1_PDT000868669.1	15	.	.	.	.	.	.	.	.	.	.	.	.	.	.	.	.	.	.	.	.	.	.	.	.	.	.	.	.	.	.	100.00;100.00	.	.	.	.	82.51;82.51	.	.	.	.	.	.	.	.	.	.	.	.
GCA_016475265.1_PDT000868666.1	10	.	.	.	.	.	.	.	.	.	.	.	.	.	.	100.00;100.00	.	.	.	.	.	.	.	.	.	.	.	.	.	.	.	100.00;100.00	.	.	.	.	.	.	.	.	.	.	.	.	.	.	.	.	100.00;100.00
GCA_016475285.1_PDT000868668.1	12	.	.	.	.	.	.	.	.	.	.	.	.	.	.	.	.	.	.	.	.	.	.	.	.	.	.	.	.	.	.	100.00;100.00	.	.	.	.	.	.	.	.	.	.	.	.	.	.	.	.	.
GCA_016475305.1_PDT000868667.1	8	.	.	.	.	.	.	.	.	.	.	89.33;97.00	.	.	100.00;100.00	.	.	.	.	.	.	.	.	.	.	.	.	.	.	.	.	.	.	.	.	.	.	.	.	.	.	.	.	.	.	.	.	.	.
GCA_016475325.1_PDT000868663.1	12	.	.	.	.	.	.	.	.	.	.	.	.	.	.	.	.	.	.	.	.	.	.	.	.	.	.	.	.	.	.	100.00;100.00	.	.	.	.	.	.	.	.	.	.	.	.	.	.	.	.	.
GCA_016475345.1_PDT000868665.1	15	.	.	.	.	.	.	.	.	.	.	.	.	.	.	.	.	.	.	.	.	.	.	.	.	.	.	.	.	.	.	.	.	.	.	.	82.51;82.51	.	.	99.88;99.88	.	.	.	.	.	.	.	.	100.00;100.00
GCA_016475365.1_PDT000868657.1	8	.	.	.	.	.	.	.	.	.	.	.	.	.	.	.	.	.	.	.	.	.	.	.	.	.	.	.	.	.	.	100.00;100.00	.	.	.	.	.	.	.	.	.	.	.	.	.	.	.	.	.
GCA_016475385.1_PDT000868658.1	13	.	.	.	.	.	.	.	.	.	.	.	.	.	.	.	.	.	.	.	.	.	.	.	.	.	.	.	.	.	.	100.00;100.00;100.00	.	.	.	.	.	.	.	99.88;99.88	.	.	.	.	.	.	.	.	.
GCA_016475405.1_PDT000868662.1	15	.	.	.	.	.	.	.	.	.	.	.	.	.	.	.	.	.	.	.	.	.	.	.	.	.	.	.	.	.	.	.	.	.	.	.	82.51;82.51	.	.	99.88;99.88	.	.	.	.	.	.	.	.	100.00;100.00
GCA_016475425.1_PDT000868655.1	6	.	.	.	.	.	.	.	.	.	.	.	.	.	.	.	.	.	.	.	.	.	.	.	.	.	.	.	.	.	.	.	.	.	.	.	.	.	.	.	.	.	.	.	.	.	.	.	.
GCA_016475445.1_PDT000868656.1	15	.	.	.	.	.	.	.	.	.	.	.	.	.	.	.	.	.	.	.	.	.	.	.	.	.	.	.	.	.	.	.	.	.	.	.	82.51;82.51	.	.	99.88;99.88	.	.	.	.	.	.	.	.	100.00;100.00
GCA_016475465.1_PDT000868654.1	15	.	.	.	.	.	.	.	.	.	.	.	.	.	.	.	.	.	.	.	.	.	.	.	.	.	.	.	.	.	.	.	.	.	.	.	82.51;82.51	.	.	99.88;99.88	.	.	.	.	.	.	.	.	100.00;100.00
GCA_016475485.1_PDT000868647.1	15	.	.	.	.	.	.	.	.	.	.	.	.	.	.	.	.	.	.	.	.	.	.	.	.	.	.	.	97.92;97.92	.	.	100.00;100.00	.	.	.	.	.	.	.	.	.	.	.	.	.	.	.	.	.
GCA_016475505.1_PDT000868646.1	15	.	.	.	.	.	.	.	.	.	.	.	.	.	.	.	.	.	.	.	.	.	.	.	.	.	.	.	97.92;97.92	.	.	100.00;100.00	.	.	.	.	.	.	.	.	.	.	.	.	.	.	.	.	.
GCA_016475525.1_PDT000868645.1	15	.	.	.	.	.	.	.	.	.	.	.	.	.	.	.	.	.	.	.	.	.	.	.	.	.	.	.	97.92;97.92	.	.	100.00;100.00	.	.	.	.	.	.	.	.	.	.	.	.	.	.	.	.	.
GCA_016475545.1_PDT000868642.1	13	.	.	.	.	.	.	.	.	.	.	89.33;97.00	.	.	100.00;100.00	.	.	.	.	.	.	.	.	.	.	.	.	.	.	.	.	.	.	.	.	.	.	.	.	99.88;99.88	.	.	.	.	.	.	.	.	.
GCA_016475565.1_PDT000868652.1	8	.	.	.	.	.	.	.	.	.	.	.	.	.	.	.	.	.	.	.	.	.	.	.	.	.	.	.	.	.	.	.	.	.	.	.	.	.	.	99.88;99.88	.	.	.	.	.	.	.	.	100.00;100.00
GCA_016475585.1_PDT000868650.1	12	.	.	.	.	.	.	.	.	.	.	.	.	.	.	.	.	.	.	.	.	.	.	.	.	.	.	.	.	.	.	100.00;100.00	.	.	.	.	.	.	.	.	.	.	.	.	.	.	.	.	.
GCA_016475605.1_PDT000868651.1	11	.	.	.	.	.	.	.	.	.	.	.	.	.	.	.	.	.	.	.	.	.	.	.	.	.	.	.	.	.	.	100.00;100.00	.	.	.	.	.	.	.	.	.	.	.	.	.	.	.	.	.
GCA_016475625.1_PDT000868648.1	14	.	.	.	.	.	.	.	.	.	.	.	.	.	.	.	.	.	.	.	.	.	.	.	.	.	.	.	97.92;97.92	.	.	100.00;100.00	.	.	.	.	.	.	.	.	.	.	.	.	.	.	.	.	.
GCA_016475645.1_PDT000868639.1	13	.	.	.	.	.	.	.	.	.	.	.	.	.	.	.	.	.	.	.	.	.	.	.	.	.	.	.	.	.	.	.	.	.	.	.	.	.	.	93.78;99.88;99.88	.	.	.	.	.	.	.	.	100.00;100.00
GCA_016475665.1_PDT000868632.1	15	.	.	.	.	.	.	.	.	.	.	.	.	.	.	.	.	.	.	.	.	.	.	.	.	.	.	.	.	.	.	.	.	.	.	.	82.51;82.51	.	.	99.88;99.88;81.97	.	.	.	.	.	.	.	.	100.00;100.00
GCA_016475685.1_PDT000868629.1	10	.	.	.	.	.	.	.	.	.	.	89.33;97.00	.	.	100.00;100.00	.	.	.	.	.	.	.	.	.	.	.	.	.	.	.	.	.	.	.	.	.	.	.	.	99.88;99.88	.	.	.	.	.	.	.	.	.
GCA_016475705.1_PDT000868604.1	15	.	.	.	.	.	.	.	.	.	.	.	.	.	.	.	.	.	.	.	.	.	.	.	.	.	.	.	.	.	.	.	.	.	.	.	82.51;82.51	.	.	99.88;99.88	.	.	.	.	.	.	.	.	100.00;100.00
GCA_016475725.1_PDT000868626.1	15	.	.	.	.	.	.	.	.	.	.	.	.	.	.	.	.	.	.	.	.	.	.	.	.	.	.	.	.	.	.	.	.	.	.	.	82.51;82.51	.	.	99.88;99.88	.	.	.	.	.	.	.	.	100.00;100.00
GCA_016475735.1_PDT000868625.1	11	.	.	.	.	.	.	.	.	.	.	.	.	.	.	.	.	.	.	.	.	.	.	.	.	.	.	.	.	.	.	.	.	.	.	.	.	.	.	99.88;99.88	.	.	.	.	.	.	.	.	.
GCA_016475765.1_PDT000868623.1	9	.	.	.	.	.	.	.	.	.	.	.	.	.	.	.	.	.	.	.	.	.	.	.	.	.	.	.	.	.	.	.	.	.	.	.	.	.	.	99.88;99.88;99.88	.	.	.	.	.	.	.	.	.
GCA_016475785.1_PDT000868624.1	11	.	.	.	.	.	.	.	.	.	.	.	.	.	.	.	.	.	.	.	.	.	.	.	.	.	.	.	.	.	.	.	.	.	.	.	.	.	.	99.88;99.88	.	.	.	.	.	.	.	.	.
GCA_016475805.1_PDT000868609.1	11	.	.	.	.	.	.	.	.	.	.	.	.	.	.	.	.	.	.	.	.	.	.	.	.	.	.	.	.	.	.	.	.	.	.	.	.	.	.	99.88;99.88	.	.	.	.	.	.	.	.	.
GCA_016475815.1_PDT000868613.1	15	.	.	.	.	.	.	.	.	.	.	.	.	.	.	.	.	.	.	.	.	.	.	.	.	.	.	.	.	.	.	.	.	.	.	.	82.51;82.51	.	.	99.88;99.88	.	.	.	.	.	.	.	.	100.00;100.00
GCA_016475845.1_PDT000868628.1	11	.	.	.	.	.	.	.	.	.	.	.	.	.	.	.	.	.	.	.	.	.	.	.	.	.	.	.	.	.	.	.	.	.	.	.	.	.	.	99.88;99.88	.	.	.	.	.	.	.	.	.
GCA_016475865.1_PDT000868611.1	12	.	.	.	.	.	.	.	.	.	.	.	.	.	.	.	.	.	.	.	.	.	.	.	.	.	.	.	.	.	.	100.00;100.00	.	.	.	.	.	.	.	.	.	.	.	.	.	.	.	.	.
GCA_016475885.1_PDT000868610.1	18	.	.	.	.	.	.	.	.	.	.	89.33;97.00	.	.	100.00;100.00	.	.	.	.	.	.	.	.	.	.	.	.	.	.	.	100.00;100.00	.	.	.	.	.	.	.	.	99.88;99.88	.	.	.	.	.	.	.	.	.
GCA_016475905.1_PDT000868608.1	15	.	.	.	.	.	.	.	.	.	.	.	.	.	.	.	.	.	.	.	.	.	.	.	.	.	.	.	.	.	.	.	.	.	.	.	82.51;82.51	.	.	99.88;99.88	.	.	.	.	.	.	.	.	100.00;100.00;100.00
GCA_016475925.1_PDT000868605.1	15	.	.	.	.	.	.	.	.	.	.	.	.	.	.	.	.	.	.	.	.	.	.	.	.	.	.	.	.	.	.	.	.	.	.	.	82.51;82.51	.	.	99.88;99.88	.	.	.	.	.	.	.	.	100.00;100.00
GCA_016475945.1_PDT000868601.1	14	.	.	.	.	.	.	.	.	.	.	97.19;96.44	.	.	.	.	.	.	.	.	.	.	.	.	.	.	.	.	.	.	.	100.00;100.00	.	.	.	.	82.51;82.51	.	.	.	.	.	.	.	.	.	.	.	.
GCA_016475965.1_PDT000868603.1	12	.	.	.	.	.	.	.	.	.	.	.	.	.	.	.	.	.	.	.	.	.	.	.	.	.	.	.	.	.	.	100.00;100.00	.	.	.	.	.	.	.	.	.	.	.	.	.	.	.	.	.
GCA_016475985.1_PDT000868602.1	12	.	.	.	.	.	.	.	.	.	.	.	.	.	.	.	.	.	.	.	.	.	.	.	.	.	.	.	.	.	.	100.00;100.00	.	.	.	.	.	.	.	.	.	.	.	.	.	.	.	.	.
GCA_016476005.1_PDT000866613.1	17	.	.	.	.	.	.	.	.	.	.	.	.	.	.	.	.	.	.	.	.	.	.	.	.	.	.	.	.	.	.	.	.	.	.	.	82.51;82.51	.	.	99.88;99.88	.	.	.	.	.	.	.	.	100.00;100.00
GCA_016476025.1_PDT000866612.1	13	.	.	.	.	.	.	.	.	.	.	.	.	.	.	.	.	.	.	.	.	.	.	.	.	.	.	.	.	.	.	.	.	.	.	.	.	.	.	99.88;99.88;99.88	.	.	.	.	.	.	.	.	100.00;100.00
GCA_016476045.1_PDT000866606.1	16	.	.	.	.	.	.	.	.	.	.	.	.	.	.	.	.	.	.	.	.	.	.	.	.	.	.	.	.	.	.	.	.	.	.	.	82.51;82.51;82.51	.	.	99.88;99.88	.	.	.	.	.	.	.	.	100.00;100.00
GCA_016476065.1_PDT000866608.1	18	.	.	.	.	.	.	.	.	.	.	100.00	.	.	.	.	.	.	.	.	.	.	.	.	.	.	87.50	.	.	.	.	.	.	.	.	.	82.51;82.51	.	.	99.88;99.88	.	.	.	.	.	.	.	.	100.00;100.00;100.00
GCA_016476085.1_PDT000866609.1	17	.	.	.	.	.	.	.	.	.	.	.	.	.	.	.	.	.	.	.	.	.	.	.	.	.	.	.	.	.	.	.	.	.	.	.	82.51;82.51;82.51	.	.	99.88;99.88	.	.	.	.	.	.	.	.	100.00;100.00
GCA_016476105.1_PDT000866611.1	15	.	.	.	.	.	.	.	.	.	.	.	.	.	.	.	.	.	.	.	.	.	.	.	.	.	.	.	.	.	.	.	.	.	.	.	82.51;82.51	.	.	99.88;99.88	.	.	.	.	.	.	.	.	100.00;100.00
GCA_016476125.1_PDT000866607.1	13	.	.	.	.	.	.	.	.	.	.	.	.	.	.	.	.	.	.	.	.	.	.	.	.	.	.	.	.	.	.	.	.	.	.	.	.	.	.	99.88;99.88	.	.	.	.	.	.	.	.	100.00;100.00
GCA_016476145.1_PDT000866597.1	13	.	.	.	.	.	.	.	.	.	.	.	.	.	.	.	.	.	.	.	.	.	.	.	.	.	.	.	.	.	.	.	.	.	.	.	.	.	.	99.88;99.88	.	.	.	.	.	.	.	.	100.00;100.00
GCA_016476165.1_PDT000866596.1	16	.	.	.	.	.	.	.	.	.	.	.	.	.	.	.	.	.	.	.	.	.	.	.	.	.	.	.	.	.	.	.	.	.	.	.	82.51;82.51	.	.	99.88;99.88	.	.	.	.	.	.	.	.	100.00;100.00
GCA_016476185.1_PDT000866598.1	16	.	.	.	.	.	.	.	.	.	.	.	.	.	.	.	.	.	.	.	.	.	.	.	.	.	.	.	.	.	.	.	.	.	.	.	82.51;82.51;82.51	.	.	99.88;99.88	.	.	.	.	.	.	.	.	100.00;100.00
GCA_016476205.1_PDT000866595.1	12	.	.	.	.	.	.	.	.	.	.	100.00;100.00	.	.	.	.	.	.	.	.	.	.	.	.	.	.	.	.	.	.	.	.	.	.	.	.	82.51;82.51	.	.	.	.	.	.	.	.	.	.	.	100.00;100.00
GCA_016476225.1_PDT000866599.1	19	.	90.24;90.24;90.24	.	.	.	.	.	.	.	100.00;100.00	.	.	.	.	.	.	.	.	.	.	.	.	.	.	.	.	.	.	.	.	100.00;100.00;100.00	.	.	.	.	82.51;82.51	.	.	.	.	.	.	.	.	.	.	.	.
GCA_016476245.1_PDT000866603.1	16	.	.	.	.	.	.	.	.	.	.	.	.	.	.	.	.	.	.	.	.	.	.	.	.	.	.	.	.	.	.	.	.	.	.	.	82.51;82.51;82.51	.	.	99.88;99.88;99.88	.	.	.	.	.	.	.	.	100.00;100.00
GCA_016476265.1_PDT000866605.1	15	.	.	.	.	.	.	.	.	.	.	100.00;100.00	.	.	.	.	.	.	.	.	.	.	.	.	.	.	.	.	.	.	.	.	.	.	.	.	82.51;82.51	.	.	99.88;99.88	.	.	.	.	.	.	.	.	100.00;100.00
GCA_016476285.1_PDT000866601.1	16	.	.	.	.	.	.	.	.	.	.	.	.	.	.	.	.	.	.	.	.	.	.	.	.	.	.	.	.	.	.	.	.	.	.	.	82.51;82.51	.	.	99.88;99.88	.	.	.	.	.	.	.	.	100.00;100.00
GCA_016476305.1_PDT000866604.1	12	.	.	.	.	.	.	.	.	.	.	.	.	.	.	.	.	.	.	.	.	.	.	.	.	.	.	.	.	.	.	.	100.00;100.00	.	.	.	82.30;82.30	.	.	99.88;99.88	.	.	.	.	.	.	.	.	.
GCA_016476315.1_PDT000866602.1	17	.	.	.	.	.	.	.	.	.	.	.	.	.	.	.	.	.	.	.	.	.	.	.	.	.	.	.	.	.	.	.	.	.	.	.	82.51;82.51	.	.	99.88;99.88	.	.	.	.	.	.	.	.	100.00;100.00
GCA_016476345.1_PDT000866600.1	16	.	.	.	.	.	.	.	.	.	.	.	.	.	.	.	.	.	.	.	.	.	.	.	.	.	.	.	.	.	.	.	.	.	.	.	82.51;82.51	.	.	99.88;99.88	.	.	.	.	.	.	.	.	100.00;100.00
GCA_016476365.1_PDT000866594.1	11	.	.	.	.	.	.	.	.	.	.	.	.	.	.	.	.	.	.	.	.	.	.	.	.	.	.	.	.	.	.	.	100.00;100.00	.	.	.	.	.	.	.	.	.	.	.	.	.	.	.	100.00;100.00
GCA_016476385.1_PDT000866591.1	6	.	.	.	.	.	.	.	.	.	.	.	.	.	.	.	.	.	.	.	.	.	.	.	.	.	.	.	.	.	.	.	100.00;100.00	.	.	.	.	.	.	.	.	.	.	.	.	.	.	.	.
GCA_016476405.1_PDT000866593.1	16	.	.	.	.	.	.	.	.	.	.	.	.	.	.	.	.	.	.	.	.	.	.	.	.	.	.	.	.	.	.	.	.	.	.	.	82.51;82.51	.	.	99.88;99.88;99.88	.	.	.	.	.	.	.	.	100.00;100.00
GCA_016476445.1_PDT000866590.1	16	.	.	.	.	.	.	.	.	.	.	.	.	.	.	.	.	.	.	.	.	.	.	.	.	.	.	.	.	.	.	.	.	.	.	.	82.51;82.51;82.51	.	.	99.88;99.88	.	.	.	.	.	.	.	.	100.00;100.00
GCA_016476465.1_PDT000866589.1	17	.	.	.	.	.	.	.	.	.	.	.	.	.	.	.	.	.	.	.	.	.	.	.	.	.	.	.	.	.	.	.	.	.	.	.	82.51;82.51	.	.	99.88;99.88	.	.	.	.	.	.	.	.	100.00;100.00
GCA_016476485.1_PDT000866586.1	16	.	.	.	.	.	.	.	.	.	.	.	.	.	.	.	.	.	.	.	.	.	.	.	.	.	.	.	.	.	.	.	.	.	.	.	82.51;80.14;82.51;82.51	.	.	99.88;99.88;99.88	.	.	.	.	.	.	.	.	100.00;100.00;100.00
GCA_016476505.1_PDT000866585.1	10	.	.	.	.	.	.	.	.	.	.	.	.	.	.	.	.	.	.	.	.	.	.	.	.	.	.	.	.	.	.	.	100.00;100.00	.	.	.	.	.	.	98.63;99.88;99.88	.	.	.	.	.	.	.	.	.
GCA_016476525.1_PDT000866588.1	12	.	.	.	.	.	.	.	.	.	.	.	.	.	.	.	.	.	.	.	.	.	.	.	.	.	.	.	.	.	.	.	.	.	.	.	.	.	.	99.88;99.88	.	.	.	.	.	.	.	.	.
GCA_016476545.1_PDT000866587.1	16	.	.	.	.	.	.	.	.	.	.	.	.	.	.	.	.	.	.	.	.	.	.	.	.	.	.	.	.	.	.	.	.	.	.	.	82.51;82.51	.	.	99.88;99.88	.	.	.	.	.	.	.	.	100.00;100.00;100.00
GCA_016476565.1_PDT000866584.1	8	.	.	.	.	.	.	.	.	.	.	.	.	.	.	.	.	.	.	.	.	.	.	.	.	.	.	.	.	.	.	.	.	.	.	.	.	.	.	99.88;99.88;99.88	.	.	.	.	.	.	.	.	.
GCA_016476585.1_PDT000866583.1	17	.	.	.	.	.	.	.	.	.	.	.	.	.	.	.	.	.	.	.	.	.	.	.	.	.	.	.	.	.	.	.	.	.	.	.	82.51;82.51	.	.	99.88;99.88	.	.	.	.	.	.	.	.	100.00;100.00
GCA_016476605.1_PDT000866571.1	16	.	.	.	.	.	.	.	.	.	.	.	.	.	.	.	.	.	.	.	.	.	.	.	.	.	.	.	.	.	.	.	.	.	.	.	82.51;82.51;82.51;82.51;82.51	.	.	99.88;99.88	.	.	.	.	.	.	.	.	100.00;100.00
GCA_016476625.1_PDT000866573.1	16	.	.	.	.	.	.	.	.	.	.	.	.	.	.	.	.	.	.	.	.	.	.	.	.	.	.	.	.	.	.	.	.	.	.	.	82.51;82.51	.	.	99.88;99.88	.	.	.	.	.	.	.	.	100.00;100.00;100.00
GCA_016476635.1_PDT000866572.1	15	.	.	.	.	.	.	.	.	.	.	100.00;100.00	.	.	.	.	.	.	.	.	.	.	.	.	.	.	.	.	.	.	.	.	.	.	.	.	82.51;82.51	.	.	99.88;99.88	.	.	.	.	.	.	.	.	100.00;100.00
GCA_016476655.1_PDT000866575.1	16	.	.	.	.	.	.	.	.	.	.	.	.	.	.	.	.	.	.	.	.	.	.	.	.	.	.	.	.	.	.	.	.	.	.	.	82.51;82.51;82.51	.	.	99.88;99.88;99.88	.	.	.	.	.	.	.	.	100.00;100.00;100.00
GCA_016476685.1_PDT000866574.1	13	.	.	.	.	.	.	.	.	.	.	.	.	.	.	.	.	.	.	.	.	.	.	.	.	.	.	.	.	.	.	.	.	.	.	.	.	.	.	99.88;99.88	.	.	.	.	.	.	.	.	100.00;100.00;100.00;100.00
GCA_016476705.1_PDT000866580.1	16	.	.	.	.	.	.	.	.	.	.	.	.	.	.	.	.	.	.	.	.	.	.	.	.	.	.	.	.	.	.	.	.	.	.	.	82.51;82.51	.	.	99.88;99.88;99.88;99.88;99.88	.	.	.	.	.	.	.	.	100.00;100.00
GCA_016476725.1_PDT000866577.1	16	.	.	.	.	.	.	.	.	.	.	.	.	.	.	.	.	.	.	.	.	.	.	.	.	.	.	.	.	.	.	.	.	.	.	.	82.51;82.51	.	.	99.88;99.88;99.88	.	.	.	.	.	.	.	.	100.00;100.00
GCA_016476745.1_PDT000866579.1	12	.	.	.	.	.	100.00;100.00	.	.	.	.	.	.	.	.	100.00;100.00	.	.	.	.	.	.	.	.	.	.	.	.	.	.	.	.	.	.	.	.	.	.	.	99.88;99.88	.	.	.	.	.	.	.	.	.
GCA_016476755.1_PDT000866578.1	16	.	.	.	.	.	.	.	.	.	.	.	.	.	.	.	.	.	.	.	.	.	.	.	.	.	.	.	.	.	.	.	.	.	.	.	82.51;82.51;82.51	.	.	99.88;99.88	.	.	.	.	.	.	.	.	100.00;100.00
GCA_016476785.1_PDT000866576.1	13	.	.	.	.	.	.	.	.	.	.	.	.	.	.	.	.	.	.	.	.	.	.	.	.	.	.	.	.	.	.	.	.	.	.	.	.	.	.	99.88;99.88	.	.	.	.	.	.	.	.	100.00;100.00
GCA_016476805.1_PDT000866562.1	14	.	.	.	.	.	.	.	.	.	.	.	.	.	.	.	.	95.71;95.71	.	.	.	.	.	.	.	.	.	.	97.92;97.92	.	.	100.00;100.00	.	.	.	.	.	.	.	.	100.00;100.00	.	.	.	.	.	.	.	.
GCA_016476825.1_PDT000866561.1	14	.	.	.	.	.	.	.	.	.	.	100.00;100.00	.	.	.	.	.	.	.	.	.	.	.	.	.	.	.	.	.	.	.	.	.	.	.	.	82.51;82.51;82.51	.	.	99.88;99.88	.	.	.	.	.	.	.	.	100.00;100.00
GCA_016476835.1_PDT000866564.1	16	.	.	.	.	.	.	.	.	.	.	100.00;96.44	.	.	.	.	.	.	.	.	.	.	.	.	.	.	87.50	.	.	.	.	.	.	.	.	.	82.51;82.51	.	.	.	.	.	.	.	.	.	.	.	100.00;100.00
GCA_016476845.1_PDT000866560.1	9	.	.	.	.	.	.	.	.	.	.	.	.	.	.	.	.	.	.	.	.	.	.	.	.	.	.	.	.	.	.	.	.	.	.	.	.	.	.	99.88;99.88;99.88	.	.	.	.	.	.	.	.	100.00;100.00
GCA_016476885.1_PDT000866563.1	17	.	.	.	.	.	.	.	.	.	.	.	.	.	.	.	.	.	.	.	.	.	.	.	.	.	.	.	.	.	.	.	.	.	.	.	82.51;82.51	.	.	99.88;99.88	.	.	.	.	.	.	.	.	100.00;100.00
GCA_016476905.1_PDT000866569.1	16	.	.	.	.	.	.	.	.	.	.	.	.	.	.	.	.	.	.	.	.	.	.	.	.	.	.	.	.	.	.	.	.	.	.	.	82.51;82.51;82.51	.	.	99.88;99.88;99.88	.	.	.	.	.	.	.	.	100.00;100.00
GCA_016476915.1_PDT000866568.1	15	.	.	.	.	.	.	.	.	.	.	100.00;100.00	.	.	.	.	.	.	.	.	.	.	.	.	.	.	.	.	.	.	.	.	.	.	.	.	82.51;82.51	.	.	99.88;99.88	.	.	.	.	.	.	.	.	100.00;100.00
GCA_016476945.1_PDT000866567.1	9	.	.	.	.	.	.	.	.	.	.	.	.	.	.	100.00;100.00	.	.	.	.	.	.	.	.	.	.	.	.	.	.	.	.	.	.	.	.	.	.	.	99.88;99.88	.	.	.	.	.	.	.	.	.
GCA_016476965.1_PDT000866559.1	15	.	.	.	.	.	.	.	.	.	.	.	.	.	.	.	.	.	.	.	.	.	.	.	.	.	.	.	.	.	.	.	.	.	.	.	82.51;82.51	.	.	99.88;99.88;99.88	.	.	.	.	.	.	.	.	100.00;100.00
GCA_016476985.1_PDT000866566.1	16	.	.	.	.	.	.	.	.	.	.	.	.	.	.	.	.	.	.	.	.	.	.	.	.	.	.	.	.	.	.	.	.	.	.	.	82.51;82.51;82.51	.	.	99.88;99.88	.	.	.	.	.	.	.	.	100.00;100.00
GCA_016477005.1_PDT000866558.1	16	.	.	.	.	.	.	.	.	.	.	.	.	.	.	.	.	.	.	.	.	.	.	.	.	.	.	.	.	.	.	.	.	.	.	.	82.51;82.51	.	.	99.88;99.88	.	.	.	.	.	.	.	.	100.00;100.00
GCA_016477025.1_PDT000866556.1	9	.	.	.	.	.	.	.	.	.	.	.	.	.	.	.	.	.	.	.	.	.	.	.	.	.	.	.	.	.	.	.	100.00;100.00	.	.	.	.	.	.	.	.	.	.	.	.	.	.	.	.
GCA_016477045.1_PDT000866555.1	11	.	.	.	.	.	.	.	.	.	.	.	.	.	.	.	.	.	.	.	.	.	.	.	.	.	.	.	.	.	.	.	.	.	.	.	82.51;82.51;82.51	.	.	.	.	.	.	.	.	.	.	.	.
GCA_016477065.1_PDT000866554.1	16	.	.	.	.	.	.	.	.	.	.	.	.	.	.	.	.	.	.	.	.	.	.	.	.	.	.	.	.	.	.	.	.	.	.	.	82.51;82.51	.	.	99.88;99.88	.	.	.	.	.	.	.	.	100.00;100.00
GCA_016477075.1_PDT000866553.1	10	.	.	.	.	.	.	.	.	.	.	.	.	.	.	.	.	95.71;95.71	.	.	.	.	.	.	.	.	.	.	.	.	.	.	.	.	.	.	.	.	.	.	.	.	.	.	.	.	.	.	.
GCA_016477105.1_PDT000866551.1	12	.	.	.	.	.	.	.	.	.	.	.	.	.	.	.	.	.	.	.	.	.	.	.	.	.	.	.	.	.	.	.	.	.	.	.	.	.	.	99.88;99.88	.	.	.	.	.	.	.	.	100.00;100.00
GCA_016477125.1_PDT000866549.1	19	.	.	.	.	.	100.00;100.00	.	.	.	.	.	.	.	.	100.00;100.00	.	.	.	.	.	.	.	.	.	.	.	.	.	.	100.00;100.00	100.00;100.00	.	.	.	.	.	.	.	.	.	.	.	.	.	.	.	.	100.00;100.00
GCA_016477145.1_PDT000866546.1	16	.	.	.	.	.	.	.	.	.	.	100.00;96.44	.	.	.	.	.	.	.	.	.	.	.	.	.	.	87.50	.	.	.	.	.	.	.	.	.	82.51;82.51	.	.	.	.	.	.	.	.	.	.	.	100.00;100.00
GCA_016477165.1_PDT000866548.1	17	.	100.00;100.00	.	.	.	100.00;100.00	.	.	.	.	.	.	.	.	100.00;100.00	.	.	.	.	.	.	.	.	.	.	.	.	.	.	.	.	.	.	.	.	.	.	.	99.88;99.88	.	.	.	.	.	.	.	.	.
GCA_016477175.1_PDT000866547.1	20	.	.	.	.	.	100.00;100.00	.	.	.	.	.	.	.	.	100.00;100.00	.	.	.	.	.	.	.	.	.	.	.	.	.	.	100.00;100.00	100.00;100.00	.	.	.	.	.	.	.	.	.	.	.	.	.	.	.	.	100.00;100.00
GCA_016477195.1_PDT000866550.1	13	.	.	.	.	.	.	.	.	.	.	.	.	.	.	.	.	.	.	.	.	.	.	.	.	.	.	.	.	.	.	.	.	.	.	.	.	.	.	99.88;99.88	.	.	.	.	.	.	.	.	100.00;100.00
GCA_016477225.1_PDT000866543.1	16	.	.	.	.	.	.	.	.	.	.	100.00;96.44	.	.	.	.	.	.	.	.	.	.	.	.	.	.	87.50	.	.	.	.	.	.	.	.	.	82.51;82.51	.	.	.	.	.	.	.	.	.	.	.	100.00;100.00
GCA_016477245.1_PDT000866542.1	17	.	.	.	.	.	.	.	.	.	.	.	.	.	.	.	.	.	.	.	.	.	.	.	.	.	.	.	.	.	.	.	.	.	.	.	82.51;82.51	.	.	99.88;99.88	.	.	.	.	.	.	.	.	100.00;100.00
GCA_016477265.1_PDT000866540.1	15	.	.	.	.	.	.	.	.	.	.	100.00;100.00	.	.	.	.	.	.	.	.	.	.	.	.	.	.	.	.	.	.	.	.	.	.	.	.	82.51;82.51	.	.	99.88;99.88	.	.	.	.	.	.	.	.	100.00;100.00
GCA_016477285.1_PDT000866541.1	16	.	.	.	.	.	.	.	.	.	.	.	.	.	.	.	.	.	.	.	.	.	.	.	.	.	.	.	.	.	.	.	.	.	.	.	82.51;82.51	.	.	99.88;99.88	.	.	.	.	.	.	.	.	100.00;100.00;100.00
GCA_016477305.1_PDT000866545.1	17	.	.	.	.	.	.	.	.	.	.	.	.	.	.	.	.	.	.	.	.	.	.	.	.	.	.	.	.	.	.	.	.	.	.	.	82.51;82.51	.	.	99.88;99.88	.	.	.	.	.	.	.	.	100.00;100.00
GCA_016477325.1_PDT000866539.1	10	.	.	.	.	.	.	.	.	.	.	.	.	.	.	.	.	.	.	.	.	.	.	.	.	.	.	.	.	.	.	.	100.00;100.00	.	.	.	.	.	.	98.63;99.88;99.88	.	.	.	.	.	.	.	.	.
GCA_016477345.1_PDT000866538.1	16	.	.	.	.	.	.	.	.	.	.	.	.	.	.	.	.	.	.	.	.	.	.	.	.	.	.	.	.	.	.	.	.	.	.	.	82.51;82.51	.	.	99.88;99.88	.	.	.	.	.	.	.	.	100.00;100.00;100.00
GCA_016477365.1_PDT000866544.1	16	.	.	.	.	.	.	.	.	.	.	.	.	.	.	.	.	.	.	.	.	.	.	.	.	.	.	.	.	.	.	.	.	.	.	.	82.51;82.51	.	.	99.88;99.88	.	.	.	.	.	.	.	.	100.00;100.00;100.00
GCA_016477385.1_PDT000866537.1	16	.	.	.	.	.	.	.	.	.	.	100.00;96.44	.	.	.	.	.	.	.	.	.	.	.	.	.	.	87.50	.	.	.	.	.	.	.	.	.	82.51;82.51	.	.	.	.	.	.	.	.	.	.	.	100.00;100.00
GCA_016477405.1_PDT000866536.1	16	.	.	.	.	.	.	.	.	.	.	.	.	.	.	.	.	.	.	.	.	.	.	.	.	.	.	.	.	.	.	.	.	.	.	.	82.51;82.51	.	.	99.88;99.88	.	.	.	.	.	.	.	.	100.00;100.00;100.00
GCA_016477425.1_PDT000866535.1	16	.	.	.	.	.	.	.	.	.	.	.	.	.	.	.	.	.	.	.	.	.	.	.	.	.	.	.	.	.	.	.	.	.	.	.	82.51;82.51;82.51	.	.	99.88;99.88	.	.	.	.	.	.	.	.	100.00;100.00;100.00
GCA_016477445.1_PDT000866534.1	9	.	.	.	.	.	.	.	.	.	.	.	.	.	100.00;100.00	.	.	.	.	.	.	.	.	.	.	.	.	.	.	.	.	.	.	.	.	.	82.51;82.51	.	.	.	.	.	.	.	.	.	.	.	100.00;100.00
GCA_016477465.1_PDT000866533.1	13	.	.	.	.	.	.	.	.	.	.	.	.	.	.	.	.	.	.	.	.	.	.	.	.	.	.	.	.	.	.	.	.	.	.	.	.	.	.	99.88;99.88	.	.	.	.	.	.	.	.	.
GCA_016477485.1_PDT000866532.1	6	.	.	.	.	.	.	.	.	.	.	.	.	.	.	.	.	.	.	.	.	.	.	.	.	.	.	.	.	.	.	.	.	.	.	.	.	.	.	99.88;99.88	.	.	.	.	.	.	.	.	.
GCA_016477505.1_PDT000866376.1	12	.	.	.	.	.	.	.	.	.	.	.	.	.	.	.	.	.	.	.	.	.	.	.	.	.	.	.	.	.	.	.	.	.	.	.	.	.	.	99.88;99.88	.	.	.	.	.	.	.	.	100.00;100.00
GCA_016477525.1_PDT000866531.1	16	.	.	.	.	.	.	.	.	.	.	.	.	.	.	.	.	.	.	.	.	.	.	.	.	.	.	.	.	.	.	.	.	.	.	.	82.51;74.79;82.51	.	.	99.88;99.88	.	.	.	.	.	.	.	.	100.00;100.00;100.00
GCA_016477545.1_PDT000866404.1	6	.	.	.	.	.	.	.	.	.	.	.	.	.	.	.	.	.	.	.	.	.	.	.	.	.	.	.	.	.	.	.	.	.	.	.	.	.	.	99.88;99.88	.	.	.	.	.	.	.	.	.
GCA_016477565.1_PDT000866479.1	11	.	.	.	.	.	.	.	.	.	.	.	.	.	.	.	.	.	.	.	.	.	.	.	.	.	.	.	.	.	.	.	.	.	.	.	.	.	.	99.88;99.88	.	.	.	.	.	.	.	.	.
GCA_016477585.1_PDT000866369.1	3	.	.	.	.	.	.	.	.	.	.	.	.	.	.	.	.	.	.	.	.	.	.	.	.	.	.	.	.	.	.	.	.	.	.	.	.	.	.	.	.	.	.	.	.	.	.	.	.
GCA_016477605.1_PDT000866351.1	12	.	.	.	.	.	.	.	.	.	.	.	.	.	.	.	.	.	.	.	.	.	.	.	.	.	.	.	.	.	.	.	.	.	.	.	.	.	.	99.88;99.88	.	.	.	.	.	.	.	.	100.00;100.00
GCA_016477625.1_PDT000866250.1	9	.	.	.	.	.	.	.	.	.	.	.	.	.	.	.	.	.	.	.	.	.	.	.	.	.	.	.	.	.	.	.	.	.	.	.	.	.	.	99.88;99.88	.	.	.	.	.	.	.	.	100.00;100.00
GCA_016477645.1_PDT000866299.1	9	.	.	.	.	.	.	.	.	.	.	.	.	.	.	100.00;100.00	.	.	.	.	.	.	.	.	.	.	.	.	.	.	.	.	.	.	.	.	.	.	.	99.88;99.88	.	.	.	.	.	.	.	.	.
GCA_016477665.1_PDT000866319.1	12	.	.	.	.	.	.	.	.	.	.	.	.	.	.	.	.	.	.	.	.	.	.	.	.	.	.	.	.	.	.	.	.	.	.	.	.	.	.	99.88;99.88	.	.	.	.	.	.	.	.	100.00;100.00
GCA_016477685.1_PDT000865959.1	12	.	.	.	.	.	.	.	.	.	.	.	.	.	.	.	.	.	.	.	.	.	.	.	.	.	.	.	.	.	.	.	.	.	.	.	.	.	.	99.88;99.88	.	.	.	.	.	.	.	.	100.00;100.00
GCA_016477705.1_PDT000866150.1	12	.	.	.	.	.	.	.	.	.	.	.	.	.	.	.	.	.	.	.	.	.	.	.	.	.	.	.	.	.	.	.	.	.	.	.	.	.	.	99.88;99.88	.	.	.	.	.	.	.	.	100.00;100.00
GCA_016477725.1_PDT000866222.1	16	.	.	.	.	.	.	.	.	.	.	.	.	.	.	.	.	.	.	.	.	.	.	.	.	.	.	.	.	.	.	.	.	.	.	.	82.51;82.51	.	.	99.88;99.88	.	.	.	.	.	.	.	.	100.00;100.00
GCA_016477745.1_PDT000866027.1	9	.	.	.	.	.	.	.	.	.	.	.	.	.	.	.	.	.	.	.	.	.	.	.	.	.	.	.	.	.	.	.	.	.	.	.	.	.	.	99.88;99.88	.	.	.	.	.	.	.	.	.
GCA_016477765.1_PDT000866192.1	3	.	.	.	.	.	.	.	.	.	.	.	.	.	.	.	.	.	.	.	.	.	.	.	.	.	.	.	.	.	.	.	.	.	.	.	.	.	.	.	.	.	.	.	.	.	.	.	.
GCA_016477785.1_PDT000865958.1	18	.	.	.	.	.	.	.	.	.	.	100.00;96.44	.	.	.	.	.	.	.	.	.	.	.	.	.	.	87.50	.	.	.	.	.	.	.	.	.	82.51;82.51	.	.	99.88;99.88	.	.	.	.	.	.	.	.	100.00;100.00
GCA_016477805.1_PDT000865957.1	18	.	100.00;100.00	.	.	.	100.00;100.00	.	.	.	.	.	.	.	.	100.00;100.00	.	.	.	.	.	.	.	.	.	.	.	.	.	.	.	.	.	.	.	.	.	.	.	99.88;99.88	.	.	.	.	.	.	.	.	.
GCA_016477825.1_PDT000865960.1	12	.	.	.	.	.	.	.	.	.	.	.	.	.	.	.	.	.	.	.	.	.	.	.	.	.	.	.	.	.	.	.	.	.	.	.	.	.	.	99.88;99.88	.	.	.	.	.	.	.	.	100.00;100.00
GCA_016477845.1_PDT000865956.1	15	.	.	.	.	.	.	.	.	.	.	100.00;100.00	.	.	.	.	.	.	.	.	.	.	.	.	.	.	.	.	.	.	.	.	.	.	.	.	82.51;82.51	.	.	99.88;99.88	.	.	.	.	.	.	.	.	100.00;100.00
GCA_016477865.1_PDT000865955.1	18	.	.	.	.	.	.	.	.	.	.	100.00;96.44	.	.	.	.	.	.	.	.	.	.	.	.	.	.	87.50	.	.	.	.	.	.	.	.	.	82.51;82.51	.	.	99.88;99.88	.	.	.	.	.	.	.	.	100.00;100.00
GCA_016477885.1_PDT000865954.1	18	.	.	.	.	.	.	.	.	.	.	100.00;96.44	.	.	.	.	.	.	.	.	.	.	.	.	.	.	87.50	.	.	.	.	.	.	.	.	.	82.51;82.51	.	.	99.88;99.88	.	.	.	.	.	.	.	.	100.00;100.00
GCA_016477905.1_PDT000865953.1	18	.	100.00;100.00	.	.	.	100.00;100.00	.	.	.	.	.	.	.	.	100.00;100.00	.	.	.	.	.	.	.	.	.	.	.	.	.	.	.	.	.	.	.	.	.	.	.	99.88;99.88	.	.	.	.	.	.	.	.	.
GCA_016477925.1_PDT000865952.1	18	.	.	.	.	.	.	.	.	.	.	100.00;96.44	.	.	.	.	.	.	.	.	.	.	.	.	.	.	87.50	.	.	.	.	.	.	.	.	.	82.51;82.51	.	.	99.88;99.88	.	.	.	.	.	.	.	.	100.00;100.00
GCA_016477945.1_PDT000865951.1	11	.	.	.	.	.	.	.	.	.	.	.	.	.	.	.	.	.	.	.	.	.	.	.	.	.	.	.	.	.	.	.	.	.	.	.	.	.	.	99.88;99.88	.	.	.	.	.	.	.	.	100.00;100.00
GCA_016477965.1_PDT000865950.1	12	.	.	.	.	.	.	.	.	.	.	.	.	.	.	.	.	.	.	.	.	.	.	.	.	.	.	.	.	.	.	.	.	.	.	.	.	.	.	99.88;99.88	.	.	.	.	.	.	.	.	100.00;100.00
GCA_016477985.1_PDT000865949.1	18	.	.	.	.	.	.	.	.	.	.	100.00;96.44	.	.	.	.	.	.	.	.	.	.	.	.	.	.	87.50	.	.	.	.	.	.	.	.	.	82.51;82.51	.	.	99.88;99.88	.	.	.	.	.	.	.	.	100.00;100.00
GCA_016478005.1_PDT000865948.1	18	.	.	.	.	.	.	.	.	.	.	100.00;96.44	.	.	.	.	.	.	.	.	.	.	.	.	.	.	87.50	.	.	.	.	.	.	.	.	.	82.51;82.51	.	.	99.88;99.88	.	.	.	.	.	.	.	.	100.00;100.00
GCA_016478025.1_PDT000865945.1	15	.	.	.	.	.	.	.	.	.	.	.	.	.	.	.	.	.	.	.	.	.	.	.	.	.	.	.	.	.	.	.	.	.	.	.	.	.	.	99.88;99.88	.	.	.	.	.	.	.	.	100.00;100.00
GCA_016478045.1_PDT000865947.1	18	.	.	.	.	.	.	.	.	.	.	100.00;96.44	.	.	.	.	.	.	.	.	.	.	.	.	.	.	87.50	.	.	.	.	.	.	.	.	.	82.51;82.51	.	.	99.88;99.88	.	.	.	.	.	.	.	.	100.00;100.00;100.00
GCA_016478065.1_PDT000865946.1	15	.	.	.	.	.	.	.	.	.	.	100.00;96.44	.	.	.	.	.	.	.	.	.	.	.	.	.	.	87.50	.	.	.	.	.	.	.	.	.	82.51;82.51	.	.	99.88;99.88	.	.	.	.	.	.	.	.	100.00;100.00
GCA_016478085.1_PDT000865943.1	10	.	.	.	.	.	.	.	.	.	.	.	.	.	.	.	.	.	.	.	.	.	.	.	.	.	.	.	.	.	.	.	.	.	.	.	82.51;82.51	.	.	99.88;99.88	.	.	.	.	.	.	.	.	100.00;100.00
GCA_016478105.1_PDT000865944.1	17	.	.	.	.	.	.	.	.	.	.	.	.	.	.	.	.	.	.	.	.	.	.	.	.	.	88.76	.	.	.	.	.	.	.	.	.	82.51;82.51	.	.	99.88;99.88	.	.	.	.	.	.	.	.	87.25;100.00
GCA_016478125.1_PDT000865932.1	14	.	.	.	.	.	100.00;100.00	.	.	.	.	.	.	.	.	100.00;100.00	.	.	.	.	.	.	.	.	.	.	.	.	.	.	.	.	.	.	.	.	82.51;82.51	.	.	99.88;99.88	.	.	.	.	.	.	.	.	100.00
GCA_016478145.1_PDT000865941.1	18	.	100.00;100.00	.	.	.	100.00;100.00	.	.	.	.	.	.	.	.	100.00;100.00	.	.	.	.	.	.	.	.	.	.	.	.	.	.	.	.	.	.	.	.	.	.	.	99.88;99.88	.	.	.	.	.	.	.	.	.
GCA_016478165.1_PDT000865940.1	12	.	.	.	.	.	.	.	.	.	.	.	.	.	.	.	.	.	.	.	.	.	.	.	.	.	.	.	.	.	.	.	.	.	.	.	.	.	.	99.88;99.88	.	.	.	.	.	.	.	.	100.00;100.00
GCA_016478185.1_PDT000865939.1	18	.	.	.	.	.	.	.	.	.	.	100.00;96.44	.	.	.	.	.	.	.	.	.	.	.	.	.	.	87.50	.	.	.	.	.	.	.	.	.	82.51;82.51	.	.	99.88;99.88	.	.	.	.	.	.	.	.	100.00;100.00
GCA_016478205.1_PDT000865931.1	10	.	.	.	.	.	.	.	.	.	.	.	.	.	.	.	.	.	.	.	.	.	.	.	.	.	.	.	.	.	.	.	.	.	.	.	82.51;82.51	.	.	99.88;99.88	.	.	.	.	.	.	.	.	100.00;100.00
GCA_016478225.1_PDT000865937.1	18	.	.	.	.	.	.	.	.	.	.	100.00;96.44	.	.	.	.	.	.	.	.	.	.	.	.	.	.	87.50	.	.	.	.	.	.	.	.	.	82.51;82.51	.	.	99.88;99.88	.	.	.	.	.	.	.	.	100.00;100.00
GCA_016478245.1_PDT000865938.1	18	.	.	.	.	.	.	.	.	.	.	100.00;96.44	.	.	.	.	.	.	.	.	.	.	.	.	.	.	87.50	.	.	.	.	.	.	.	.	.	82.51;82.51	.	.	99.88;99.88	.	.	.	.	.	.	.	.	100.00;100.00
GCA_016478265.1_PDT000865942.1	13	.	.	.	.	.	.	.	.	.	.	.	.	.	.	.	.	.	.	.	.	.	.	.	.	.	.	.	.	.	.	.	.	.	.	.	.	.	.	99.88;99.88	.	.	.	.	.	.	.	.	100.00;100.00
GCA_016478285.1_PDT000865933.1	18	.	100.00;100.00	.	.	.	100.00;100.00	.	.	.	.	.	.	.	.	100.00;100.00	.	.	.	.	.	.	.	.	.	.	.	.	.	.	.	.	.	.	.	.	.	.	.	99.88;99.88	.	.	.	.	.	.	.	.	.
GCA_016478295.1_PDT000865934.1	12	.	.	.	.	.	.	.	.	.	.	.	.	.	.	.	.	.	.	.	.	.	.	.	.	.	.	.	.	.	.	.	.	.	.	.	.	.	.	99.88;99.88	.	.	.	.	.	.	.	.	100.00;100.00
GCA_016478325.1_PDT000865935.1	18	.	.	.	.	.	.	.	.	.	.	100.00;96.44	.	.	.	.	.	.	.	.	.	.	.	.	.	.	87.50	.	.	.	.	.	.	.	.	.	82.51;82.51	.	.	99.88;99.88	.	.	.	.	.	.	.	.	100.00;100.00
GCA_016478345.1_PDT000865936.1	18	.	.	.	.	.	.	.	.	.	.	100.00;96.44	.	.	.	.	.	.	.	.	.	.	.	.	.	.	87.50	.	.	.	.	.	.	.	.	.	82.51;82.51	.	.	99.88;99.88	.	.	.	.	.	.	.	.	100.00;100.00
GCA_016478365.1_PDT000865930.1	10	.	.	.	.	.	.	.	.	.	.	.	.	.	.	.	.	.	.	.	.	.	.	.	.	.	.	.	.	.	.	.	.	.	.	.	82.51;82.51	.	.	99.88;99.88	.	.	.	.	.	.	.	.	100.00;100.00
GCA_016478385.1_PDT000865929.1	18	.	.	.	.	.	.	.	.	.	.	100.00;96.44	.	.	.	.	.	.	.	.	.	.	.	.	.	.	87.50	.	.	.	.	.	.	.	.	.	82.51;82.51	.	.	99.88;99.88	.	.	.	.	.	.	.	.	100.00;100.00
GCA_016478405.1_PDT000865927.1	18	.	.	.	.	.	.	.	.	.	.	100.00;96.44	.	.	.	.	.	.	.	.	.	.	.	.	.	.	87.50	.	.	.	.	.	.	.	.	.	82.51;82.51	.	.	99.88;99.88	.	.	.	.	.	.	.	.	100.00;100.00
GCA_016478425.1_PDT000865925.1	18	.	.	.	.	.	.	.	.	.	.	100.00;96.44	.	.	.	.	.	.	.	.	.	.	.	.	.	.	87.50	.	.	.	.	.	.	.	.	.	82.51;82.51	.	.	99.88;99.88	.	.	.	.	.	.	.	.	100.00;100.00
GCA_016478445.1_PDT000865928.1	11	.	.	.	.	.	.	.	.	.	.	.	.	.	.	.	.	.	.	.	.	.	.	.	.	.	.	.	.	.	.	.	.	.	.	.	82.51;82.51	.	.	.	.	.	.	.	.	.	.	.	.
GCA_016478465.1_PDT000865923.1	18	.	.	.	.	.	.	.	.	.	.	100.00;96.44	.	.	.	.	.	.	.	.	.	.	.	.	.	.	87.50	.	.	.	.	.	.	.	.	.	82.51;82.51	.	.	99.88;99.88	.	.	.	.	.	.	.	.	100.00;100.00
GCA_016478485.1_PDT000865922.1	14	.	.	.	.	.	.	.	.	.	.	.	.	.	.	.	.	.	.	.	.	.	.	.	.	.	.	.	.	.	.	.	.	.	.	.	82.51;82.51	.	.	99.88;99.88	.	.	.	.	.	.	.	.	.
GCA_016478505.1_PDT000865921.1	18	.	.	.	.	.	.	.	.	.	.	100.00;96.44	.	.	.	.	.	.	.	.	.	.	.	.	.	.	87.50	.	.	.	.	.	.	.	.	.	82.51;82.51	.	.	99.88;99.88	.	.	.	.	.	.	.	.	100.00;100.00
GCA_016478525.1_PDT000865920.1	14	.	.	.	.	.	.	.	.	.	.	.	.	.	.	.	.	.	.	.	.	.	.	.	.	.	.	.	.	.	.	.	.	.	.	.	82.51;82.51	.	.	99.88;99.88	.	.	.	.	.	.	.	.	.
GCA_016478545.1_PDT000865918.1	15	.	.	.	.	.	.	.	.	.	.	.	.	.	.	.	.	.	.	.	.	.	.	.	.	.	.	.	.	.	.	.	.	.	.	.	82.51;82.51	.	.	99.88;99.88	.	.	.	.	.	.	.	.	100.00;100.00
GCA_016478565.1_PDT000865909.1	18	.	.	.	.	.	.	.	.	.	.	100.00;96.44	.	.	.	.	.	.	.	.	.	.	.	.	.	.	87.50	.	.	.	.	.	.	.	.	.	82.51;82.51	.	.	99.88;99.88	.	.	.	.	.	.	.	.	100.00;100.00
GCA_016478585.1_PDT000865911.1	18	.	100.00;100.00	.	.	.	100.00;100.00	.	.	.	.	.	.	.	.	100.00;100.00	.	.	.	.	.	.	.	.	.	.	.	.	.	.	.	.	.	.	.	.	.	.	.	99.88;99.88	.	.	.	.	.	.	.	.	.
GCA_016478605.1_PDT000865908.1	16	.	.	.	.	.	.	.	.	.	.	.	.	.	.	.	.	.	.	.	.	.	.	.	.	.	.	.	.	.	.	.	.	.	.	.	82.51;82.51	.	.	99.88;99.88	.	.	.	.	.	.	.	.	100.00;100.00
GCA_016478625.1_PDT000865907.1	13	.	.	.	.	.	.	.	.	.	.	.	.	.	.	.	.	.	.	.	.	.	.	.	.	.	.	.	.	.	.	.	.	.	.	.	.	.	.	99.88;99.88	.	.	.	.	.	.	.	.	100.00;100.00
GCA_016478645.1_PDT000865910.1	9	.	.	.	.	.	.	.	.	.	.	.	.	.	.	.	.	.	.	.	.	.	.	.	.	.	.	.	.	.	.	.	.	.	.	.	.	.	.	99.88;99.88	.	.	.	.	.	.	.	.	.
GCA_016478665.1_PDT000865917.1	12	.	.	.	.	.	.	.	.	.	.	.	.	.	.	.	.	.	.	.	.	.	.	.	.	.	.	.	.	.	.	.	.	.	.	.	.	.	.	99.88;99.88	.	.	.	.	.	.	.	.	100.00;100.00
GCA_016478685.1_PDT000865915.1	18	.	.	.	.	.	.	.	.	.	.	100.00;96.44	.	.	.	.	.	.	.	.	.	.	.	.	.	.	87.50	.	.	.	.	.	.	.	.	.	82.51;82.51	.	.	99.88;99.88	.	.	.	.	.	.	.	.	100.00;100.00
GCA_016478705.1_PDT000865912.1	18	.	.	.	.	.	.	.	.	.	.	100.00;96.44	.	.	.	.	.	.	.	.	.	.	.	.	.	.	87.50	.	.	.	.	.	.	.	.	.	82.51;82.51	.	.	99.88;99.88	.	.	.	.	.	.	.	.	100.00;100.00
GCA_016478725.1_PDT000865914.1	18	.	.	.	.	.	.	.	.	.	.	100.00;96.44	.	.	.	.	.	.	.	.	.	.	.	.	.	.	87.50	.	.	.	.	.	.	.	.	.	82.51;82.51	.	.	99.88;99.88	.	.	.	.	.	.	.	.	100.00;100.00
GCA_016478745.1_PDT000865906.1	18	.	.	.	.	.	.	.	.	.	.	100.00;96.44	.	.	.	.	.	.	.	.	.	.	.	.	.	.	87.50	.	.	.	.	.	.	.	.	.	82.51;82.51	.	.	99.88;99.88	.	.	.	.	.	.	.	.	100.00;100.00
GCA_016478765.1_PDT000864240.1	12	.	.	.	.	.	.	.	.	.	.	.	.	.	.	.	.	.	.	.	.	.	.	.	.	.	.	.	.	.	.	.	.	.	.	.	.	.	.	99.88;99.88	.	.	.	.	.	.	.	.	100.00;100.00
GCA_016478805.1_PDT000865896.1	3	.	.	.	.	.	.	.	.	.	.	.	.	.	.	.	.	.	.	.	.	.	.	.	.	.	.	.	.	.	.	.	.	.	.	.	.	.	.	.	.	.	.	.	.	.	.	.	.
GCA_016478825.1_PDT000865895.1	11	.	.	.	.	.	.	.	.	.	.	.	.	.	.	.	.	.	.	.	.	.	.	.	.	.	.	.	.	.	.	.	.	.	.	.	82.51;82.51	.	.	.	.	.	.	.	.	.	.	.	.
GCA_016478845.1_PDT000865902.1	18	.	.	.	.	.	.	.	.	.	.	100.00;96.44	.	.	.	.	.	.	.	.	.	.	.	.	.	.	87.50	.	.	.	.	.	.	.	.	.	82.51;82.51	.	.	99.88;99.88	.	.	.	.	.	.	.	.	100.00;100.00
GCA_016478865.1_PDT000865903.1	18	.	.	.	.	.	.	.	.	.	.	100.00;96.44	.	.	.	.	.	.	.	.	.	.	.	.	.	.	87.50	.	.	.	.	.	.	.	.	.	82.51;82.51	.	.	99.88;99.88	.	.	.	.	.	.	.	.	100.00;100.00
GCA_016478885.1_PDT000865905.1	15	.	.	.	.	.	.	.	.	.	.	100.00;96.44	.	.	.	.	.	.	.	.	.	.	.	.	.	.	87.50	.	.	.	.	.	.	.	.	.	82.51;82.51	.	.	99.88;99.88	.	.	.	.	.	.	.	.	100.00;100.00
GCA_016478905.1_PDT000865900.1	15	.	.	.	.	.	.	.	.	.	.	100.00;96.44	.	.	.	.	.	.	.	.	.	.	.	.	.	.	87.50	.	.	.	.	.	.	.	.	.	82.51;82.51	.	.	99.88;99.88	.	.	.	.	.	.	.	.	100.00;100.00
GCA_016478925.1_PDT000865898.1	18	.	.	.	.	.	.	.	.	.	.	100.00;96.44	.	.	.	.	.	.	.	.	.	.	.	.	.	.	87.50	.	.	.	.	.	.	.	.	.	82.51;82.51	.	.	99.88;99.88	.	.	.	.	.	.	.	.	100.00;100.00
GCA_016478945.1_PDT000865901.1	18	.	.	.	.	.	.	.	.	.	.	100.00;96.44	.	.	.	.	.	.	.	.	.	.	.	.	.	.	87.50	.	.	.	.	.	.	.	.	.	82.51;82.51;82.51;82.51	.	.	99.88;99.88	.	.	.	.	.	.	.	.	100.00;100.00
GCA_016478955.1_PDT000865899.1	11	.	.	.	.	.	.	.	.	.	.	.	.	.	.	.	.	.	.	.	.	.	.	.	.	.	.	.	.	.	.	.	.	.	.	.	.	.	.	99.88;99.88	.	.	.	.	.	.	.	.	.
GCA_016478985.1_PDT000864236.1	7	.	.	.	.	.	.	.	.	.	.	.	.	.	.	.	.	.	.	.	.	.	.	.	.	.	.	.	.	.	.	.	.	.	.	.	.	.	.	99.88;99.88	.	.	.	.	.	.	.	.	.
GCA_016479005.1_PDT000865897.1	16	.	.	.	.	.	.	.	.	.	.	.	.	.	.	.	.	.	.	.	.	.	.	.	.	.	.	.	.	.	.	.	.	.	.	.	82.51;82.51	.	.	99.88;99.88	.	.	.	.	.	.	.	.	100.00;100.00
GCA_016479025.1_PDT000864235.1	9	.	.	.	.	.	.	.	.	.	.	.	.	.	100.00;100.00	.	.	.	.	.	.	.	.	.	.	.	.	.	.	.	.	.	.	.	.	.	.	.	.	99.88;99.88	.	.	.	.	.	.	.	.	.
GCA_016479045.1_PDT000864233.1	10	.	.	.	.	.	.	.	.	.	.	89.33;97.00	.	.	100.00;100.00	.	.	.	.	.	.	.	.	.	.	.	.	.	.	.	.	.	.	.	.	.	.	.	.	99.88;99.88	.	.	.	.	.	.	.	.	.
GCA_016479065.1_PDT000864237.1	12	.	.	.	.	.	.	.	.	.	.	.	.	.	.	.	.	.	.	.	.	.	.	.	.	.	.	.	.	.	.	.	.	.	.	.	.	.	.	99.88;99.88	.	.	.	.	.	.	.	.	100.00;100.00
GCA_016479085.1_PDT000864222.1	18	.	.	.	.	.	.	.	.	.	.	100.00;96.44	.	.	.	.	.	.	.	.	.	.	.	.	.	.	87.50	.	.	.	.	.	.	.	.	.	82.51;82.51	.	.	99.88;99.88	.	.	.	.	.	.	.	.	100.00;100.00
GCA_016479105.1_PDT000864232.1	12	.	.	.	.	.	.	.	.	.	.	.	.	.	.	.	.	.	.	.	.	.	.	.	.	.	.	.	.	.	.	.	.	.	.	.	.	.	.	99.88;99.88	.	.	.	.	.	.	.	.	.
GCA_016479125.1_PDT000864231.1	12	.	.	.	.	.	.	.	.	.	.	.	.	.	.	.	.	.	.	.	.	.	.	.	.	.	.	.	97.92;97.92	.	.	100.00;100.00	.	.	.	.	.	.	.	99.88;99.88	.	.	.	.	.	.	100.00;100.00	.	.
GCA_016479145.1_PDT000864223.1	8	.	.	.	.	.	.	.	.	.	.	.	.	.	.	.	.	.	.	.	.	.	.	.	.	.	.	.	.	.	.	.	.	.	.	.	.	.	.	99.88;99.88	.	.	.	.	.	.	.	.	.
GCA_016479165.1_PDT000864230.1	9	.	.	.	.	.	.	.	.	.	.	.	.	.	.	.	.	.	.	.	.	.	.	.	.	.	.	.	97.92;97.92	.	.	100.00;100.00	.	.	.	.	.	.	.	.	.	.	.	.	.	.	100.00;100.00	.	.
GCA_016479185.1_PDT000864220.1	7	.	.	.	.	.	.	.	.	.	.	.	.	.	.	.	.	.	.	.	.	.	.	.	.	.	.	.	.	.	.	.	.	.	.	.	.	.	.	99.88;99.88	.	.	.	.	.	.	.	.	.
GCA_016479205.1_PDT000864217.1	12	.	.	.	.	.	.	.	.	.	.	.	.	.	.	.	.	.	.	.	.	.	.	.	.	.	.	.	.	.	.	.	.	.	.	.	.	.	.	99.88;99.88	.	.	.	.	.	.	.	.	100.00;100.00
GCA_016479225.1_PDT000864221.1	4	.	.	.	.	.	.	.	.	.	.	.	.	.	.	.	.	.	.	.	.	.	.	.	.	.	.	.	.	.	.	.	.	.	.	.	.	.	.	.	.	.	.	.	.	.	.	.	.
GCA_016479245.1_PDT000864216.1	12	.	.	.	.	.	.	.	.	.	.	.	.	.	.	.	.	.	.	.	.	.	.	.	.	.	.	.	.	.	.	.	.	.	.	.	.	.	.	99.88;99.88	.	.	.	.	.	.	.	.	100.00;100.00
GCA_016479255.1_PDT000850644.1	17	.	.	.	.	.	.	.	.	.	.	89.33;96.44	.	.	100.00;100.00	.	.	.	.	.	.	.	.	.	.	.	.	.	.	.	.	.	.	.	.	.	82.51;82.51	.	.	99.88;99.88	.	.	.	.	.	.	.	.	100.00
GCA_016479285.1_PDT000850638.1	8	.	.	.	.	.	.	.	.	.	.	.	.	.	.	100.00;100.00	.	.	.	.	.	.	.	.	.	.	.	.	.	.	.	100.00;100.00	.	.	.	.	.	.	.	.	.	.	.	.	.	.	.	.	100.00;100.00
GCA_016479305.1_PDT000850640.1	11	.	.	.	.	.	.	.	.	.	.	.	.	.	.	.	.	.	.	.	.	.	.	.	.	.	.	.	.	.	.	.	.	.	.	.	.	.	.	99.88;99.88	.	.	.	.	.	.	.	.	.
GCA_016479325.1_PDT000850639.1	12	.	.	.	.	.	.	.	.	.	.	.	.	.	.	.	.	.	.	.	.	.	.	.	.	.	.	.	.	.	.	.	.	.	.	.	.	.	.	99.88;99.88	.	.	.	.	.	.	.	.	100.00;100.00
GCA_016479345.1_PDT000850641.1	7	.	.	.	.	.	.	.	.	.	.	.	.	.	.	.	.	.	.	.	.	.	.	.	.	.	.	.	.	.	.	.	.	.	.	.	.	.	.	99.88;71.64;99.88	.	.	.	.	.	.	.	.	.
GCA_016479355.1_PDT000850642.1	12	.	.	.	.	.	.	.	.	.	.	.	.	.	.	.	.	.	.	.	.	.	.	.	.	.	.	.	.	.	.	.	.	.	.	.	.	.	.	99.88;99.88	.	.	.	.	.	.	.	.	100.00;100.00
GCA_016479385.1_PDT000850643.1	12	.	.	.	.	.	.	.	.	.	.	.	.	.	.	.	.	.	.	.	.	.	.	.	.	.	.	.	.	.	.	.	.	.	.	.	.	.	.	99.88;99.88;99.75	.	.	.	.	.	.	.	.	100.00;100.00
GCA_016479405.1_PDT000850636.1	10	.	.	.	.	.	.	.	.	.	.	.	.	.	.	.	.	.	.	.	.	.	.	.	.	.	.	.	97.92;97.92	89.65	.	100.00;100.00	.	.	.	.	.	.	.	.	.	.	.	.	.	.	100.00;100.00	.	.
GCA_016479425.1_PDT000850617.1	7	.	.	.	.	.	.	.	.	.	.	.	.	.	.	.	.	.	.	.	.	.	.	.	.	.	.	.	.	.	.	.	.	.	.	.	.	.	.	.	.	.	.	.	.	.	.	.	.
GCA_016479435.1_PDT000850616.1	9	.	.	.	.	.	.	.	.	.	.	.	.	.	.	.	.	.	.	.	.	.	.	.	.	.	.	.	97.92;97.92	.	.	100.00;100.00	.	.	.	.	.	.	.	.	.	.	.	.	.	.	100.00;100.00	.	.
GCA_016479465.1_PDT000850618.1	12	.	.	.	.	.	.	.	.	.	.	.	.	.	.	.	.	.	.	.	.	.	.	.	.	.	.	.	.	.	.	.	.	.	.	.	.	.	.	99.88;99.88	.	.	.	.	.	.	.	.	100.00;100.00
GCA_016479485.1_PDT000850615.1	12	.	.	.	.	.	.	.	.	.	.	.	.	.	.	.	.	.	.	.	.	.	.	.	.	.	.	.	.	.	.	.	.	.	.	.	.	.	.	99.88;99.88	.	.	.	.	.	.	.	.	100.00;100.00
GCA_016479505.1_PDT000850614.1	12	.	.	.	.	.	.	.	.	.	.	.	.	.	.	.	.	.	.	.	.	.	.	.	.	.	.	.	.	.	.	.	.	.	.	.	.	.	.	99.88;99.88	.	.	.	.	.	.	.	.	100.00;100.00
GCA_016479525.1_PDT000850600.1	17	.	.	.	.	.	.	.	.	.	.	89.33;96.44	.	.	100.00;100.00	.	.	.	.	.	.	.	.	.	.	.	.	.	.	.	.	.	.	.	.	.	82.51	.	.	99.88;99.88	.	.	.	.	.	.	.	.	100.00
GCA_016479545.1_PDT000850599.1	18	.	.	.	.	.	.	.	.	.	.	89.33;96.44	.	.	100.00;100.00	.	.	.	.	.	.	.	.	.	.	.	87.12	.	.	.	.	.	.	.	.	.	82.51;82.51	.	.	99.88;99.88	.	.	.	.	.	.	.	.	100.00
GCA_016479565.1_PDT000850609.1	12	.	.	.	.	.	.	.	.	.	.	.	.	.	.	.	.	.	.	.	.	.	.	.	.	.	.	.	.	.	.	.	.	.	.	.	.	.	.	99.88;99.88	.	.	.	.	.	.	.	.	100.00;100.00
GCA_016479575.1_PDT000850613.1	12	.	.	.	.	.	.	.	.	.	.	.	.	.	.	.	.	.	.	.	.	.	.	.	.	.	.	.	.	.	.	.	.	.	.	.	.	.	.	99.88;99.88	.	.	.	.	.	.	.	.	100.00;100.00
GCA_016479605.1_PDT000850610.1	13	.	.	.	.	.	.	.	.	.	.	.	.	.	.	.	.	.	.	.	.	.	.	.	.	.	.	.	.	.	.	.	.	.	.	.	.	.	.	99.88;99.88	.	.	.	.	.	.	.	.	100.00;100.00
GCA_016479625.1_PDT000850608.1	12	.	.	.	.	.	.	.	.	.	.	.	.	.	.	.	.	.	.	.	.	.	.	.	.	.	.	.	.	.	.	.	.	.	.	.	.	.	.	99.88;99.88	.	.	.	.	.	.	.	.	100.00;100.00
GCA_016479645.1_PDT000850607.1	12	.	.	.	.	.	.	.	.	.	.	.	.	.	.	.	.	.	.	.	.	.	.	.	.	.	.	.	.	.	.	.	.	.	.	.	.	.	.	99.88;99.88	.	.	.	.	.	.	.	.	100.00;100.00
GCA_016479665.1_PDT000850605.1	12	.	.	.	.	.	.	.	.	.	.	.	.	.	.	.	.	.	.	.	.	.	.	.	.	.	.	.	.	.	.	.	.	.	.	.	.	.	.	99.88;99.88	.	.	.	.	.	.	.	.	100.00;100.00
GCA_016479685.1_PDT000850603.1	12	.	.	.	.	.	.	.	.	.	.	.	.	.	.	.	.	.	.	.	.	.	.	.	.	.	.	.	.	.	.	.	.	.	.	.	.	.	.	99.88;99.88	.	.	.	.	.	.	.	.	100.00;100.00
GCA_016479705.1_PDT000850604.1	12	.	.	.	.	.	.	.	.	.	.	.	.	.	.	.	.	.	.	.	.	.	.	.	.	.	.	.	.	.	.	.	.	.	.	.	.	.	.	99.88;99.88	.	.	.	.	.	.	.	.	100.00;100.00
GCA_016479725.1_PDT000850606.1	12	.	.	.	.	.	.	.	.	.	.	.	.	.	.	.	.	.	.	.	.	.	.	.	.	.	.	.	.	.	.	.	.	.	.	.	.	.	.	99.88;99.88	.	.	.	.	.	.	.	.	100.00;100.00
GCA_016479745.1_PDT000850601.1	12	.	.	.	.	.	.	.	.	.	.	.	.	.	.	.	.	.	.	.	.	.	.	.	.	.	.	.	.	.	.	.	.	.	.	.	.	.	.	99.88;99.88	.	.	.	.	.	.	.	.	100.00;100.00
GCA_016479765.1_PDT000850597.1	7	.	.	.	.	.	.	.	.	.	.	.	.	.	.	.	.	.	.	.	.	.	.	.	.	.	.	.	.	.	.	.	.	.	.	.	.	.	.	.	.	.	.	.	.	.	.	.	.
GCA_016479785.1_PDT000850598.1	17	.	.	.	.	.	.	.	.	.	.	89.33;96.44	.	.	100.00;100.00	.	.	.	.	.	.	.	.	.	.	.	.	.	.	.	.	.	.	.	.	.	82.51;82.51	.	.	99.88;99.88	.	.	.	.	.	.	.	.	100.00
GCA_016479805.1_PDT000850596.1	17	.	.	.	.	.	.	.	.	.	.	89.33;96.44	.	.	100.00;100.00	.	.	.	.	.	.	.	.	.	.	.	.	.	.	.	.	.	.	.	.	.	82.51;82.51	.	.	99.88;99.88	.	.	.	.	.	.	.	.	100.00
GCA_016479825.1_PDT000850595.1	17	.	.	.	.	.	.	.	.	.	.	89.33;96.44	.	.	100.00;100.00	.	.	.	.	.	.	.	.	.	.	.	.	.	.	.	.	.	.	.	.	.	82.51;82.51	.	.	99.88;99.88	.	.	.	.	.	.	.	.	100.00
GCA_016479845.1_PDT000850589.1	18	.	.	.	.	.	.	.	.	.	.	89.33;96.44	.	.	100.00;100.00	.	.	.	.	.	.	.	.	.	.	.	87.12	.	.	.	.	.	.	.	.	.	82.51;82.51	.	.	99.88;99.88	.	.	.	.	.	.	.	.	100.00
GCA_016479855.1_PDT000850594.1	17	.	.	.	.	.	.	.	.	.	.	88.76;96.44	.	.	100.00;100.00	.	.	.	.	.	.	.	.	.	.	.	.	.	.	.	.	.	.	.	.	.	82.51;82.51	.	.	99.88;99.88	.	.	.	.	.	.	.	.	100.00
GCA_016479885.1_PDT000850591.1	17	.	.	.	.	.	.	.	.	.	.	89.33;96.44	.	.	100.00;100.00	.	.	.	.	.	.	.	.	.	.	.	.	.	.	.	.	.	.	.	.	.	82.51;82.51	.	.	99.88;99.88	.	.	.	.	.	.	.	.	100.00
GCA_016479905.1_PDT000850588.1	17	.	.	.	.	.	.	.	.	.	.	89.33;96.44	.	.	100.00;100.00	.	.	.	.	.	.	.	.	.	.	.	.	.	.	.	.	.	.	.	.	.	82.51;82.51	.	.	99.88;99.88	.	.	.	.	.	.	.	.	100.00
GCA_016479925.1_PDT000850586.1	17	.	.	.	.	.	.	.	.	.	.	88.76;96.44	.	.	100.00;100.00	.	.	.	.	.	.	.	.	.	.	.	.	.	.	.	.	.	.	.	.	.	82.51	.	.	99.88;99.88	.	.	.	.	.	.	.	.	100.00
GCA_016479945.1_PDT000850587.1	7	.	.	.	.	.	.	.	.	.	.	.	.	.	.	.	.	.	.	.	.	.	.	.	.	.	.	.	.	.	.	.	.	.	.	.	.	.	.	.	.	.	.	.	.	.	.	.	.
GCA_016479965.1_PDT000850584.1	17	.	.	.	.	.	.	.	.	.	.	89.33;96.44	.	.	100.00;100.00	.	.	.	.	.	.	.	.	.	.	.	.	.	.	.	.	.	.	.	.	.	82.51;82.51	.	.	99.88;99.88	.	.	.	.	.	.	.	.	83.70;100.00
GCA_016479985.1_PDT000850582.1	18	.	.	.	.	.	.	.	.	.	.	89.33;87.45	.	.	100.00;100.00	.	.	.	.	.	.	.	.	.	.	.	87.12	.	.	.	.	.	.	.	.	.	82.51;82.51	.	.	99.88;99.88	.	.	.	.	.	.	.	.	100.00;100.00
GCA_016480005.1_PDT000850585.1	7	.	.	.	.	.	.	.	.	.	.	.	.	.	.	.	.	.	.	.	.	.	.	.	.	.	.	.	.	.	.	.	.	.	.	.	.	.	.	.	.	.	.	.	.	.	.	.	.
GCA_016480025.1_PDT000850573.1	7	.	.	.	.	.	.	.	.	.	.	.	.	.	.	.	.	.	.	.	.	.	.	.	.	.	.	.	.	.	.	.	.	.	.	.	.	.	.	.	.	.	.	.	.	.	.	.	.
GCA_016480045.1_PDT000850581.1	7	.	.	.	.	.	.	.	.	.	.	.	.	.	.	.	.	.	.	.	.	.	.	.	.	.	.	.	.	.	.	.	.	.	.	.	.	.	.	.	.	.	.	.	.	.	.	.	.
GCA_016480065.1_PDT000850578.1	17	.	.	.	.	.	.	.	.	.	.	89.33;96.44	.	.	100.00;100.00	.	.	.	.	.	.	.	.	.	.	.	.	.	.	.	.	.	.	.	.	.	82.51;82.51	.	.	99.88;99.88	.	.	.	.	.	.	.	.	100.00
GCA_016480085.1_PDT000850577.1	17	.	.	.	.	.	.	.	.	.	.	89.33;96.44	.	.	100.00;100.00	.	.	.	.	.	.	.	.	.	.	.	.	.	.	.	.	.	.	.	.	.	82.51;82.51	.	.	99.88;99.88	.	.	.	.	.	.	.	.	100.00
GCA_016480105.1_PDT000850579.1	7	.	.	.	.	.	.	.	.	.	.	.	.	.	.	.	.	.	.	.	.	.	.	.	.	.	.	.	.	.	.	.	.	.	.	.	.	.	.	.	.	.	.	.	.	.	.	.	.
GCA_016480125.1_PDT000850576.1	17	.	.	.	.	.	.	.	.	.	.	89.33;96.44	.	.	100.00;100.00	.	.	.	.	.	.	.	.	.	.	.	.	.	.	.	.	.	.	.	.	.	82.51;82.51	.	.	99.88;99.88	.	.	.	.	.	.	.	.	100.00
GCA_016480145.1_PDT000850575.1	7	.	.	.	.	.	.	.	.	.	.	.	.	.	.	.	.	.	.	.	.	.	.	.	.	.	.	.	.	.	.	.	.	.	.	.	.	.	.	.	.	.	.	.	.	.	.	.	.
GCA_016480165.1_PDT000850572.1	12	.	.	.	.	.	.	.	.	.	.	.	.	.	.	.	.	.	.	.	.	.	.	.	.	.	.	.	.	.	.	.	.	.	.	.	.	.	.	99.88;99.88	.	.	.	.	.	.	.	.	100.00;100.00
GCA_016480185.1_PDT000850574.1	17	.	.	.	.	.	.	.	.	.	.	88.76;96.44	.	.	100.00;100.00	.	.	.	.	.	.	.	.	.	.	.	.	.	.	.	.	.	.	.	.	.	82.51;82.51	.	.	99.88;99.88	.	.	.	.	.	.	.	.	100.00
GCA_016480205.1_PDT000850566.1	17	.	.	.	.	.	.	.	.	.	.	88.76;96.44	.	.	100.00;100.00	.	.	.	.	.	.	.	.	.	.	.	.	.	.	.	.	.	.	.	.	.	82.51;82.51	.	.	99.88;99.88	.	.	.	.	.	.	.	.	100.00
GCA_016480225.1_PDT000850567.1	17	.	.	.	.	.	.	.	.	.	.	89.33;96.44	.	.	100.00;100.00	.	.	.	.	.	.	.	.	.	.	.	.	.	.	.	.	.	.	.	.	.	82.51;82.51	.	.	99.88;99.88	.	.	.	.	.	.	.	.	100.00
GCA_016480245.1_PDT000850571.1	17	.	.	.	.	.	.	.	.	.	.	89.33;96.44	.	.	100.00;100.00	.	.	.	.	.	.	.	.	.	.	.	.	.	.	.	.	.	.	.	.	.	82.51	.	.	99.88;99.88	.	.	.	.	.	.	.	.	100.00
GCA_016480265.1_PDT000850569.1	7	.	.	.	.	.	.	.	.	.	.	.	.	.	.	.	.	.	.	.	.	.	.	.	.	.	.	.	.	.	.	.	.	.	.	.	.	.	.	.	.	.	.	.	.	.	.	.	.
GCA_016480275.1_PDT000850568.1	7	.	.	.	.	.	.	.	.	.	.	.	.	.	.	.	.	.	.	.	.	.	.	.	.	.	.	.	.	.	.	.	.	.	.	.	.	.	.	.	.	.	.	.	.	.	.	.	.
GCA_016480305.1_PDT000850561.1	14	.	.	.	.	.	.	.	.	.	.	.	.	.	.	.	.	.	.	.	.	.	.	.	.	.	.	.	97.92;97.92	.	.	100.00;100.00	.	.	.	.	.	.	.	.	.	.	.	.	.	.	.	.	.
GCA_016480325.1_PDT000850565.1	11	.	.	.	.	.	.	.	.	.	.	.	.	.	.	.	.	.	.	.	.	.	.	.	.	.	.	.	.	.	.	.	.	.	.	.	.	.	.	99.88;99.88	.	.	.	.	.	.	.	.	100.00;100.00
GCA_016480345.1_PDT000850564.1	17	.	.	.	.	.	.	.	.	.	.	88.76;96.44	.	.	100.00;100.00	.	.	.	.	.	.	.	.	.	.	.	.	.	.	.	.	.	.	.	.	.	82.51;82.51	.	.	99.88;99.88	.	.	.	.	.	.	.	.	100.00
GCA_016480365.1_PDT000850562.1	7	.	.	.	.	.	.	.	.	.	.	.	.	.	.	.	.	.	.	.	.	.	.	.	.	.	.	.	.	.	.	.	.	.	.	.	.	.	.	.	.	.	.	.	.	.	.	.	.
GCA_016480385.1_PDT000850545.1	11	.	.	.	.	.	.	.	.	.	.	.	.	.	.	.	.	.	.	.	.	.	.	.	.	.	.	.	.	.	.	.	.	.	.	.	.	.	.	99.88;99.88	.	.	.	.	.	.	.	.	.
GCA_016480395.1_PDT000850551.1	8	.	.	.	.	.	.	.	.	.	.	.	.	.	.	100.00;100.00	.	.	.	.	.	.	.	.	.	.	.	.	.	.	.	100.00;100.00	.	.	.	.	.	.	.	.	.	.	.	.	.	.	.	.	100.00;100.00
GCA_016480415.1_PDT000850559.1	3	.	.	.	.	.	.	.	.	.	.	.	.	.	.	.	.	.	.	.	.	.	.	.	.	.	.	.	.	.	.	.	.	.	.	.	.	.	.	.	.	.	.	.	.	.	.	.	.
GCA_016480425.1_PDT000850553.1	18	.	.	.	.	.	.	.	.	.	.	88.76;96.44	.	.	100.00;100.00	.	.	.	.	.	.	.	.	.	.	.	87.12	.	.	.	.	.	.	.	.	.	82.51;82.51	.	.	99.88;99.88;99.75	.	.	.	.	.	.	.	.	100.00
GCA_016480435.1_PDT000850560.1	15	.	.	.	.	.	.	.	.	.	.	.	.	.	.	.	.	.	.	.	.	.	.	.	.	.	.	.	.	.	.	.	.	.	.	.	82.51;82.51	.	.	99.88;99.88	.	.	.	.	.	.	.	.	100.00;100.00
GCA_016480485.1_PDT000850558.1	8	.	.	.	.	.	.	.	.	.	.	.	.	.	.	.	.	.	.	.	.	.	.	.	.	.	.	.	.	.	.	.	.	.	.	.	.	.	.	99.88;99.88	.	.	.	.	.	.	.	.	.
GCA_016480505.1_PDT000850555.1	12	.	.	.	.	.	.	.	.	.	.	.	.	.	.	.	.	.	.	.	.	.	.	.	.	.	.	.	.	.	.	.	.	.	.	.	.	.	.	99.88;99.88	.	.	.	.	.	.	.	.	100.00;100.00
GCA_016480525.1_PDT000850556.1	12	.	.	.	.	.	.	.	.	.	.	.	.	.	.	.	.	.	.	.	.	.	.	.	.	.	.	.	.	.	.	.	.	.	.	.	.	.	.	99.88;99.88	.	.	.	.	.	.	.	.	100.00;100.00
GCA_016480545.1_PDT000850550.1	9	.	.	.	.	.	.	.	.	.	.	.	.	.	.	.	.	.	.	.	.	.	.	.	.	.	.	.	.	.	.	.	.	.	.	.	.	.	.	99.88;81.59;99.88	.	.	.	.	.	.	.	.	.
GCA_016480565.1_PDT000850554.1	8	.	.	.	.	.	.	.	.	.	.	.	.	.	.	.	.	.	.	.	.	.	.	.	.	.	.	.	.	.	.	.	.	.	.	.	.	.	.	99.88;99.88	.	.	.	.	.	.	.	.	100.00;100.00
GCA_016480585.1_PDT000850546.1	12	.	.	.	.	.	.	.	.	.	.	.	.	.	.	.	.	.	.	.	.	.	.	.	.	.	.	.	.	.	.	.	.	.	.	.	.	.	.	99.88;99.88	.	.	.	.	.	.	.	.	100.00;100.00
GCA_016480605.1_PDT000850549.1	9	.	.	.	.	.	.	.	.	.	.	.	.	.	.	.	.	.	.	.	.	.	.	.	.	.	.	.	.	.	.	.	.	.	.	.	.	.	.	99.88;99.88	.	.	.	.	.	.	.	.	.
GCA_016480625.1_PDT000850544.1	14	.	.	.	.	.	.	.	.	.	.	.	.	.	.	.	.	.	.	.	.	.	.	.	.	.	.	.	.	.	.	.	.	.	.	.	82.51;82.51	.	.	99.88;99.88	.	.	.	.	.	.	.	.	100.00;100.00
GCA_016480685.1_PDT000850539.1	12	.	.	.	.	.	.	.	.	.	.	.	.	.	.	.	.	.	.	.	.	.	.	.	.	.	.	.	.	.	.	.	.	.	.	.	.	.	.	99.88;99.88	.	.	.	.	.	.	.	.	100.00;100.00
GCA_016480705.1_PDT000850540.1	17	.	.	.	.	.	.	.	.	.	.	100.00;96.44	.	.	.	.	.	.	.	.	.	.	.	.	.	.	87.50	.	.	.	.	.	.	.	.	.	82.51;82.51	.	.	99.88;99.88	.	.	.	.	.	.	.	.	100.00;100.00
GCA_016480725.1_PDT000850537.1	9	.	.	.	.	.	.	.	.	.	.	.	.	.	.	.	.	.	.	.	.	.	.	.	.	.	.	.	.	.	.	.	.	.	.	.	.	.	.	99.88;99.88	.	.	.	.	.	.	.	.	100.00;100.00
GCA_016480745.1_PDT000850534.1	14	.	.	.	.	.	.	.	.	.	.	.	.	.	.	.	.	.	.	.	.	.	.	.	.	.	.	.	.	.	.	.	.	.	.	.	82.51;82.51	.	.	99.88;99.88	.	.	.	.	.	.	.	.	100.00;100.00
GCA_016480765.1_PDT000850536.1	10	.	.	.	.	.	.	.	.	.	.	.	.	.	.	.	.	.	.	.	.	.	.	.	.	.	.	.	.	.	.	.	.	.	.	.	.	.	.	99.88;99.88	.	.	.	.	.	.	.	.	.
GCA_016480775.1_PDT000850538.1	9	.	.	.	.	.	.	.	.	.	.	.	.	.	.	.	.	.	.	.	.	.	.	.	.	.	.	.	.	.	.	100.00;100.00	.	.	.	.	.	.	.	.	.	.	.	.	.	.	.	.	.
GCA_016480805.1_PDT000850535.1	10	.	.	.	.	.	.	.	.	.	.	.	.	.	.	.	.	.	.	.	.	.	.	.	.	.	.	.	.	.	.	.	.	.	.	.	.	.	.	99.88;99.88	.	.	.	.	.	.	.	.	.
GCA_016480825.1_PDT000850532.1	13	.	.	.	.	.	.	.	.	.	.	.	.	.	.	.	.	.	.	.	.	.	.	.	.	.	.	.	.	.	.	.	.	.	.	.	.	.	.	99.88;99.88	.	.	.	.	.	.	.	.	100.00;100.00
GCA_016480845.1_PDT000850533.1	6	.	.	.	.	.	.	.	.	.	.	.	.	.	.	.	.	.	.	.	.	.	.	.	.	.	.	.	.	.	.	.	.	.	.	.	.	.	.	.	.	.	.	.	.	.	.	.	.
GCA_016480865.1_PDT000850528.1	9	.	.	.	.	.	.	.	.	.	.	.	.	.	.	.	.	.	.	.	.	.	.	.	.	.	.	.	.	.	.	.	.	.	.	.	.	.	.	99.88;81.72;99.88	.	.	.	.	.	.	.	.	.
GCA_016480885.1_PDT000850530.1	16	.	.	.	.	.	.	.	.	.	.	.	.	.	.	.	.	.	.	.	.	.	.	.	.	.	.	.	.	.	.	.	.	.	.	.	82.51;82.51	.	.	99.88;99.88;99.88	.	.	.	.	.	.	.	.	100.00;100.00
GCA_016480905.1_PDT000850529.1	9	.	.	.	.	.	.	.	.	.	.	.	.	.	.	.	.	.	.	.	.	.	.	.	.	.	.	.	.	.	.	.	.	.	.	.	.	.	.	99.88;99.88	.	.	.	.	.	.	.	.	.
GCA_016480925.1_PDT000850527.1	7	.	.	.	.	.	.	.	.	.	.	.	.	.	.	.	.	.	.	.	.	.	.	.	.	.	.	.	.	.	.	.	.	.	.	.	.	.	.	99.88;99.88	.	.	.	.	.	.	.	.	.
GCA_016480945.1_PDT000850531.1	10	.	.	.	.	.	.	.	.	.	.	.	.	.	.	100.00;100.00	.	.	.	.	.	.	.	.	.	.	.	.	.	.	.	.	.	.	.	.	.	.	.	99.88;99.88	.	.	.	.	.	.	.	.	.
GCA_016480965.1_PDT000850524.1	12	.	.	.	.	.	.	.	.	.	.	.	.	.	.	.	.	.	.	.	.	.	.	.	.	.	.	.	.	.	.	.	.	.	.	.	.	.	.	99.88;99.88	.	.	.	.	.	.	.	.	100.00;100.00
GCA_016480985.1_PDT000850526.1	12	.	.	.	.	.	.	.	.	.	.	.	.	.	.	.	.	.	.	.	.	.	.	.	.	.	.	.	.	.	.	.	.	.	.	.	.	.	.	99.88;99.88	.	.	.	.	.	.	.	.	100.00;100.00
GCA_016481005.1_PDT000850523.1	12	.	.	.	.	.	.	.	.	.	.	.	.	.	.	.	.	.	.	.	.	.	.	.	.	.	.	.	.	.	.	.	.	.	.	.	.	.	.	99.88;99.88	.	.	.	.	.	.	.	.	100.00;100.00
GCA_016481025.1_PDT000850525.1	8	.	.	.	.	.	.	.	.	.	.	.	.	.	.	.	.	.	.	.	.	.	.	.	.	.	.	.	.	.	.	.	.	.	.	.	.	.	.	99.88;99.88	.	.	.	.	.	.	.	.	.
GCA_016481045.1_PDT000821626.1	10	.	.	.	.	.	.	.	.	.	.	.	.	.	.	.	.	.	.	.	.	.	.	.	.	.	.	.	.	.	.	.	.	.	.	.	.	.	.	99.88;99.88	.	.	.	.	.	.	.	.	100.00;100.00
GCA_016481055.1_PDT000850518.1	13	.	.	.	.	.	.	.	.	.	.	.	.	.	.	.	.	.	.	.	.	.	.	.	.	.	.	.	.	.	.	.	.	.	.	.	.	.	.	99.88;99.88	.	.	.	.	.	.	.	.	100.00;100.00
GCA_016481085.1_PDT000850521.1	12	.	.	.	.	.	.	.	.	.	.	.	.	.	.	.	.	.	.	.	.	.	.	.	.	.	.	.	.	.	.	.	.	.	.	.	.	.	.	99.88;99.88	.	.	.	.	.	.	.	.	100.00;100.00
GCA_016481105.1_PDT000821627.1	9	.	.	.	.	.	.	.	.	.	.	.	.	.	.	.	.	.	.	.	.	.	.	.	.	.	.	.	97.92;97.92	.	.	100.00;100.00	.	.	.	.	.	.	.	.	.	.	.	.	.	.	100.00;100.00	.	.
GCA_016481125.1_PDT000850517.1	12	.	.	.	.	.	.	.	.	.	.	.	.	.	.	.	.	.	.	.	.	.	.	.	.	.	.	.	.	.	.	.	.	.	.	.	.	.	.	99.88;99.88	.	.	.	.	.	.	.	.	100.00;100.00
GCA_016481145.1_PDT000821625.1	12	.	.	.	.	.	.	.	.	.	.	.	.	.	.	.	.	.	.	.	.	.	.	.	.	.	.	.	.	.	.	.	.	.	.	.	.	.	.	99.88;99.88	.	.	.	.	.	.	.	.	100.00;100.00
GCA_016481165.1_PDT000850522.1	12	.	.	.	.	.	.	.	.	.	.	.	.	.	.	.	.	.	.	.	.	.	.	.	.	.	.	.	.	.	.	.	.	.	.	.	.	.	.	99.88;99.88	.	.	.	.	.	.	.	.	.
GCA_016481185.1_PDT000821623.1	14	.	.	.	.	.	.	.	.	.	.	.	.	.	.	.	.	.	.	.	.	.	.	.	.	.	.	.	97.92;97.92	.	.	100.00;100.00	.	.	.	.	.	.	.	.	.	.	.	.	.	.	.	.	.
GCA_016481205.1_PDT000850520.1	12	.	.	.	.	.	.	.	.	.	.	.	.	.	.	.	.	.	.	.	.	.	.	.	.	.	.	.	.	.	.	.	.	.	.	.	.	.	.	99.88;99.88	.	.	.	.	.	.	.	.	100.00;100.00
GCA_016481225.1_PDT000821624.1	11	.	.	.	.	.	.	.	.	.	.	.	.	.	.	.	.	.	.	.	.	.	.	.	.	.	.	.	.	.	.	.	.	.	.	.	82.51;82.51	.	.	99.88;99.88	.	.	.	.	.	.	.	.	100.00;100.00
GCA_016481245.1_PDT000821622.1	12	.	.	.	.	.	.	.	.	.	.	.	.	.	.	.	.	.	.	.	.	.	.	.	.	.	.	.	.	.	.	.	.	.	.	.	.	.	.	99.88;99.88	.	.	.	.	.	.	.	.	100.00;100.00
GCA_016481365.1_PDT000821605.1	6	.	.	.	.	.	.	.	.	.	.	.	.	.	.	.	.	.	.	.	.	.	.	.	.	.	.	.	.	.	.	.	.	.	.	.	.	.	.	.	.	.	.	.	.	.	.	.	.
GCA_016481385.1_PDT000821606.1	10	.	.	.	.	.	.	.	.	.	.	.	.	.	.	.	.	.	.	.	.	.	.	.	.	.	.	.	.	.	.	.	.	.	.	.	.	.	.	99.88;99.88	.	.	.	.	.	.	.	.	.
GCA_016481405.1_PDT000821607.1	11	.	.	.	.	.	.	.	.	.	.	.	.	.	.	.	.	.	.	.	.	.	.	.	.	.	.	.	.	.	.	.	.	.	.	.	.	.	.	99.88;99.88	.	.	.	.	.	.	.	.	100.00;100.00
GCA_016481425.1_PDT000821604.1	11	.	.	.	.	.	.	.	.	.	.	.	.	.	.	.	.	.	.	.	.	.	.	.	.	.	.	.	.	.	.	.	.	.	.	.	.	.	.	99.88;99.88	.	.	.	.	.	.	.	.	100.00;100.00
GCA_016481445.1_PDT000821620.1	11	.	.	.	.	.	.	.	.	.	.	.	.	.	.	.	.	.	.	.	.	.	.	.	.	.	.	.	.	.	.	.	.	.	.	.	82.51;82.51	.	.	99.88;99.88	.	.	.	.	.	.	.	.	100.00;100.00
GCA_016481565.1_PDT000821619.1	14	.	.	.	.	.	.	.	.	.	.	.	.	.	.	.	.	.	.	.	.	.	.	.	.	.	.	.	.	.	.	.	.	.	.	.	82.51;82.51	.	.	99.88;99.88	.	.	.	.	.	.	.	.	100.00;100.00
GCA_016481575.1_PDT000821610.1	9	.	.	.	.	.	.	.	.	.	.	.	.	.	.	.	.	.	.	.	.	.	.	.	.	.	.	.	97.92;97.92	.	.	100.00;100.00	.	.	.	.	.	.	.	.	.	.	.	.	.	.	100.00;100.00	.	.
GCA_016481585.1_PDT000821616.1	14	.	.	.	.	.	.	.	.	.	.	.	.	.	.	.	.	.	.	.	.	.	.	.	.	.	.	.	97.92;97.92	.	.	100.00;100.00	.	.	.	.	.	.	.	.	.	.	.	.	.	.	.	.	.
GCA_016481625.1_PDT000821611.1	12	.	.	.	.	.	.	.	.	.	.	.	.	.	.	.	.	.	.	.	.	.	.	.	.	.	.	.	.	.	.	.	.	.	.	.	.	.	.	99.88;99.88	.	.	.	.	.	.	.	.	100.00;100.00
GCA_016481645.1_PDT000821614.1	14	.	.	.	.	.	.	.	.	.	.	.	.	.	.	.	.	.	.	.	.	.	.	.	.	.	.	.	97.92;97.92	.	.	100.00;100.00	.	.	.	.	.	.	.	.	.	.	.	.	.	.	.	.	.
GCA_016481745.1_PDT000821608.1	11	.	.	.	.	.	.	.	.	.	.	.	.	.	.	.	.	.	.	.	.	.	.	.	.	.	.	.	.	.	.	.	.	.	.	.	.	.	.	99.88;99.88	.	.	.	.	.	.	.	.	100.00;100.00
GCA_016481785.1_PDT000821609.1	11	.	.	.	.	.	.	.	.	.	.	.	.	.	.	.	.	.	.	.	.	.	.	.	.	.	.	.	.	.	.	.	.	.	.	.	.	.	.	99.88;99.88	.	.	.	.	.	.	.	.	100.00;100.00
GCA_016482455.1_PDT000821592.1	12	.	.	.	.	.	.	.	.	.	.	.	.	.	.	.	.	.	.	.	.	.	.	.	.	.	.	.	.	.	.	.	.	.	.	.	.	.	.	99.88;99.88	.	.	.	.	.	.	.	.	100.00;100.00
GCA_016482475.1_PDT000821603.1	11	.	.	.	.	.	.	.	.	.	.	.	.	.	.	.	.	.	.	.	.	.	.	.	.	.	.	.	.	.	.	.	.	.	.	.	.	.	.	99.88;99.88;99.75	.	.	.	.	.	.	.	.	100.00;100.00
GCA_016482505.1_PDT000821593.1	12	.	.	.	.	.	.	.	.	.	.	.	.	.	.	.	.	.	.	.	.	.	.	.	.	.	.	.	.	.	.	.	.	.	.	.	.	.	.	99.88;99.88;99.88	.	.	.	.	.	.	.	.	100.00;100.00
GCA_016482555.1_PDT000821602.1	11	.	.	.	.	.	.	.	.	.	.	.	.	.	.	.	.	.	.	.	.	.	.	.	.	.	.	.	.	.	.	.	.	.	.	.	.	.	.	99.88;99.88	.	.	.	.	.	.	.	.	100.00;100.00
GCA_016482595.1_PDT000821594.1	9	.	.	.	.	.	.	.	.	.	.	.	.	.	.	.	.	.	.	.	.	.	.	.	.	.	.	.	.	.	.	100.00;100.00	.	.	.	.	.	.	.	.	.	.	.	.	.	.	.	.	.
GCA_016482625.1_PDT000821591.1	12	.	.	.	.	.	.	.	.	.	.	.	.	.	.	.	.	.	.	.	.	.	.	.	.	.	.	.	.	.	.	.	.	.	.	.	.	.	.	99.88;99.88	.	.	.	.	.	.	.	.	100.00;100.00
GCA_016482665.1_PDT000821597.1	12	.	.	.	.	.	.	.	.	.	.	.	.	.	.	.	.	.	.	.	.	.	.	.	.	.	.	.	.	.	.	.	.	.	.	.	.	.	.	99.88;99.88	.	.	.	.	.	.	.	.	100.00;100.00
GCA_016482715.1_PDT000821590.1	12	.	.	.	.	.	.	.	.	.	.	.	.	.	.	.	.	.	.	.	.	.	.	.	.	.	.	.	.	.	.	.	.	.	.	.	.	.	.	99.88;99.88	.	.	.	.	.	.	.	.	100.00;100.00
GCA_016482735.1_PDT000821600.1	12	.	.	.	.	.	.	.	.	.	.	.	.	.	.	.	.	.	.	.	.	.	.	.	.	.	.	.	.	.	.	.	.	.	.	.	.	.	.	99.88;99.88	.	.	.	.	.	.	.	.	100.00;100.00
GCA_016482765.1_PDT000821601.1	11	.	.	.	.	.	.	.	.	.	.	.	.	.	.	.	.	.	.	.	.	.	.	.	.	.	.	.	.	.	.	.	.	.	.	.	.	.	.	99.88;99.88	.	.	.	.	.	.	.	.	100.00;100.00
GCA_016482795.1_PDT000821589.1	12	.	.	.	.	.	.	.	.	.	.	.	.	.	.	.	.	.	.	.	.	.	.	.	.	.	.	.	.	.	.	.	.	.	.	.	.	.	.	99.88;99.88	.	.	.	.	.	.	.	.	100.00;100.00
GCA_016482835.1_PDT000821596.1	12	.	.	.	.	.	.	.	.	.	.	.	.	.	.	.	.	.	.	.	.	.	.	.	.	.	.	.	.	.	.	.	.	.	.	.	.	.	.	99.88;99.88	.	.	.	.	.	.	.	.	100.00;100.00
GCA_016482875.1_PDT000821584.1	10	.	.	.	.	.	.	.	.	.	.	100.00;97.00	.	.	100.00;100.00	.	.	.	.	.	.	.	.	.	.	.	.	.	.	.	.	.	.	.	.	.	.	.	.	99.88;99.88	.	.	.	.	.	.	.	.	.
GCA_016482925.1_PDT000821582.1	12	.	.	.	.	.	.	.	.	.	.	.	.	.	.	93.89;94.07	.	.	.	.	.	.	.	.	.	.	.	.	.	.	.	.	.	.	.	.	.	.	.	98.63;99.88	.	.	.	.	.	.	.	.	.
GCA_016482965.1_PDT000821585.1	7	.	.	.	.	.	.	.	.	.	.	.	.	.	.	.	.	.	.	.	.	.	.	.	.	.	.	.	.	.	.	.	.	.	.	.	.	.	.	99.88;99.88	.	.	.	.	.	.	.	.	.
GCA_016482995.1_PDT000821587.1	12	.	.	.	.	.	.	.	.	.	.	.	.	.	.	.	.	.	.	.	.	.	.	.	.	.	.	.	.	.	.	.	.	.	.	.	.	.	.	99.88;99.88	.	.	.	.	.	.	.	.	100.00;100.00
GCA_016483035.1_PDT000821580.1	8	.	.	.	.	.	.	.	.	.	.	.	.	.	.	.	.	.	.	.	.	.	.	.	.	.	.	.	.	.	.	.	.	.	.	.	.	.	.	99.88;99.88	.	.	.	.	.	.	99.51;100.00	.	.
GCA_016483045.1_PDT000821583.1	10	.	.	.	.	.	.	.	.	.	.	89.33;97.00	.	.	100.00;100.00	.	.	.	.	.	.	.	.	.	.	.	.	.	.	.	.	.	.	.	.	.	.	.	.	99.88;99.88	.	.	.	.	.	.	.	.	.
GCA_016483145.1_PDT000821579.1	4	.	.	.	.	.	.	.	.	.	.	.	.	.	.	.	.	.	.	.	.	.	.	.	.	.	.	.	.	.	.	.	.	.	.	.	.	.	.	.	.	.	.	.	.	.	.	.	.
GCA_016483225.1_PDT000821578.1	11	.	.	.	.	.	.	.	.	.	.	.	.	.	.	.	.	.	.	.	.	.	.	.	.	.	.	.	.	.	.	.	.	.	.	.	.	.	.	99.88;99.88	.	.	.	.	.	.	.	.	.
GCA_016483805.1_PDT000821575.1	15	.	.	.	.	.	.	.	.	.	.	.	.	.	.	.	.	.	.	.	.	.	.	.	.	.	.	.	.	.	.	.	.	.	.	.	82.51;82.51	.	.	99.88;99.88	.	.	.	.	.	.	.	.	100.00;100.00
GCA_016483825.1_PDT000821573.1	11	.	.	.	.	.	.	.	.	.	.	.	.	.	.	.	.	.	.	.	.	.	.	.	.	.	.	.	.	.	.	.	.	.	.	.	71.81;72.02	.	.	99.88;99.88	.	.	.	.	.	.	.	.	100.00;100.00
GCA_016483855.1_PDT000821577.1	10	.	.	.	.	.	.	.	.	.	.	.	.	.	.	.	.	.	.	.	.	.	.	.	.	.	.	.	.	.	.	.	.	.	.	.	.	.	.	99.88;99.88	.	.	.	.	.	.	.	.	.
GCA_016483875.1_PDT000821574.1	8	.	.	.	.	.	.	.	.	.	.	.	.	.	.	.	.	.	.	.	.	.	.	.	.	.	.	.	.	.	.	.	.	.	.	.	.	.	.	99.88;99.88	.	.	.	.	.	.	.	.	.
GCA_016483895.1_PDT000821576.1	7	.	.	.	.	.	.	.	.	.	.	.	.	.	.	.	.	.	.	.	.	.	.	.	.	.	.	.	.	.	.	.	.	.	.	.	.	.	.	99.88;99.88	.	.	.	.	.	.	.	.	.
GCA_016484015.1_PDT000821572.1	7	.	.	.	.	.	.	.	.	.	.	.	.	.	.	.	.	.	.	.	.	.	.	.	.	.	.	.	.	.	.	.	.	.	.	.	.	.	.	99.88;99.88	.	.	.	.	.	.	.	.	.
GCA_016484085.1_PDT000821571.1	7	.	.	.	.	.	.	.	.	.	.	.	.	.	.	.	.	.	.	.	.	.	.	.	.	.	.	.	.	.	.	.	.	.	.	.	.	.	.	99.88;99.88	.	.	.	.	.	.	.	.	.
GCA_016484105.1_PDT000821570.1	12	.	.	.	.	.	.	.	.	.	.	.	.	.	.	.	.	.	.	.	.	.	.	.	.	.	.	.	.	.	.	.	.	.	.	.	.	.	.	99.88;99.88	.	.	.	.	.	.	.	.	.
GCA_016484155.1_PDT000821569.1	11	.	.	.	.	.	.	.	.	.	.	.	.	.	.	.	.	.	.	.	.	.	.	.	.	.	.	.	.	.	.	.	.	.	.	.	.	.	.	99.88;99.88	.	.	.	.	.	.	.	.	100.00;100.00
GCA_016484195.1_PDT000821562.1	14	.	.	.	.	.	.	.	.	.	.	.	.	.	.	.	.	.	.	.	.	.	.	.	.	.	.	.	97.92;97.92	.	.	100.00;100.00	.	.	.	.	.	.	.	.	.	.	.	.	.	.	.	.	.
GCA_016484225.1_PDT000821542.1	8	.	.	.	.	.	.	.	.	.	.	.	.	.	.	.	.	.	.	.	.	.	.	.	.	.	.	.	.	.	.	.	.	.	.	.	.	.	.	99.88;99.88	.	.	.	.	.	.	.	.	.
GCA_016484245.1_PDT000821533.1	14	.	.	.	.	.	.	.	.	.	.	.	.	.	.	.	.	.	.	.	.	.	.	.	.	.	.	.	97.92;97.92	.	.	100.00;100.00	.	.	.	.	.	.	.	.	.	.	.	.	.	.	.	.	.
GCA_016484265.1_PDT000821567.1	5	.	.	.	.	.	.	.	.	.	.	.	.	.	.	.	.	.	.	.	.	.	.	.	.	.	.	.	.	.	.	.	.	.	.	.	.	.	.	.	.	.	.	.	.	.	.	.	.
GCA_016484325.1_PDT000821558.1	9	.	.	.	.	.	.	.	.	.	.	.	.	.	.	.	.	.	.	.	.	.	.	.	.	.	.	.	.	.	.	100.00;100.00	.	.	.	.	.	.	.	.	.	.	.	.	.	.	.	.	.
GCA_016484385.1_PDT000821531.1	10	.	.	.	.	.	.	.	.	.	.	89.33;97.00	.	.	100.00;100.00	.	.	.	.	.	.	.	.	.	.	.	.	.	.	.	.	.	.	.	.	.	.	.	.	99.88;99.88	.	.	.	.	.	.	.	.	.
GCA_016484405.1_PDT000821516.1	10	.	.	.	.	.	.	.	.	.	.	89.33;97.00;97.00	.	.	100.00;100.00	.	.	.	.	.	.	.	.	.	.	.	.	.	.	.	.	.	.	.	.	.	.	.	.	99.88;99.88	.	.	.	.	.	.	.	.	.
GCA_016484465.1_PDT000821526.1	10	.	.	.	.	.	.	.	.	.	.	89.33;97.00	.	.	100.00;100.00	.	.	.	.	.	.	.	.	.	.	.	.	.	.	.	.	.	.	.	.	.	.	.	.	99.88;99.88;99.88	.	.	.	.	.	.	.	.	.
GCA_016484515.1_PDT000821528.1	12	.	.	.	.	.	.	.	.	.	.	.	.	.	.	.	.	.	.	.	.	.	.	.	.	.	.	.	.	.	.	.	.	.	.	.	.	.	.	99.88;99.88	.	.	.	.	.	.	.	.	100.00;100.00
GCA_016484535.1_PDT000821529.1	12	.	.	.	.	.	.	.	.	.	.	.	.	.	.	100.00;100.00	.	.	.	.	.	.	.	.	.	.	.	.	.	.	.	.	.	.	.	.	.	.	.	98.63;99.88	.	.	.	.	.	.	.	.	.
GCA_016484545.1_PDT000821530.1	12	.	.	.	.	.	.	.	.	.	.	.	.	.	.	100.00;100.00	.	.	.	.	.	.	.	.	.	.	.	.	.	.	.	.	.	.	.	.	.	.	.	98.63;99.88	.	.	.	.	.	.	.	.	.
GCA_016484585.1_PDT000821515.1	8	.	.	.	.	.	.	.	.	.	.	.	.	.	.	100.00;100.00	.	.	.	.	.	.	.	.	.	.	.	.	.	.	.	100.00;100.00	.	.	.	.	.	.	.	.	.	.	.	.	.	.	.	.	100.00;100.00
GCA_016484605.1_PDT000821498.1	10	.	.	.	.	.	.	.	.	.	.	89.33;97.00	.	.	100.00;100.00	.	.	.	.	.	.	.	.	.	.	.	.	.	.	.	.	.	.	.	.	.	.	.	.	99.88;99.88	.	.	.	.	.	.	.	.	.
GCA_016484625.1_PDT000821499.1	13	.	.	.	.	.	.	.	.	.	.	89.33;96.63	.	.	100.00;100.00	.	.	.	.	.	.	.	.	.	.	.	.	.	.	.	100.00;100.00	.	.	.	.	.	.	.	.	99.88;99.88	.	.	.	.	.	.	.	.	.
GCA_016484645.1_PDT000821507.1	6	.	.	.	.	.	.	.	.	.	.	.	.	.	.	.	.	.	.	.	.	.	.	.	.	.	.	.	.	.	.	.	.	.	.	.	.	.	.	.	.	.	.	.	.	.	.	.	.
GCA_016484665.1_PDT000821497.1	7	.	.	.	.	.	.	.	.	.	.	.	.	.	.	.	.	.	.	.	.	.	.	.	.	.	.	.	.	.	.	.	.	.	.	.	.	.	.	99.88;99.88	.	.	.	.	.	.	.	.	.
GCA_016484685.1_PDT000821496.1	12	.	.	.	.	.	.	.	.	.	.	.	.	.	.	.	.	.	.	.	.	.	.	.	.	.	.	.	.	.	.	.	.	.	.	.	.	.	.	99.88;99.88	.	.	.	.	.	.	.	.	100.00;100.00
GCA_016484705.1_PDT000821511.1	11	.	.	.	.	.	.	.	.	.	.	.	.	.	.	.	.	.	.	.	.	.	.	.	.	.	.	.	.	.	.	.	.	.	.	.	71.81;72.02	.	.	99.88;99.88	.	.	.	.	.	.	.	.	100.00;100.00
GCA_016484725.1_PDT000821506.1	3	.	.	.	.	.	.	.	.	.	.	.	.	.	.	.	.	.	.	.	.	.	.	.	.	.	.	.	.	.	.	.	.	.	.	.	.	.	.	.	.	.	.	.	.	.	.	.	.
GCA_016484745.1_PDT000821504.1	10	.	.	.	.	.	.	.	.	.	.	.	.	.	.	100.00;100.00	.	.	.	.	.	.	.	.	.	.	.	.	.	.	.	.	.	.	.	.	.	.	.	99.88;99.88	.	.	.	.	.	.	.	.	.
GCA_016484765.1_PDT000821503.1	9	.	.	.	.	.	.	.	.	.	.	.	.	.	.	100.00;100.00	.	.	.	.	.	.	.	.	.	.	.	.	.	.	.	.	.	.	.	.	.	.	.	99.88;99.88	.	.	.	.	.	.	.	.	.
GCA_016484785.1_PDT000821495.1	7	.	.	.	.	.	.	.	.	.	.	.	.	.	.	.	.	.	.	.	.	.	.	.	.	.	.	.	.	.	.	.	.	.	.	.	.	.	.	99.88;99.88	.	.	.	.	.	.	.	.	.
GCA_016484805.1_PDT000821501.1	12	.	.	.	.	.	.	.	.	.	.	.	.	.	.	.	.	.	.	.	.	.	.	.	.	.	.	.	.	.	.	.	.	.	.	.	.	.	.	99.88;99.88	.	.	.	.	.	.	.	.	.
GCA_016484825.1_PDT000821493.1	10	.	.	.	.	.	.	.	.	.	.	89.33;97.00	.	.	100.00;100.00	.	.	.	.	.	.	.	.	.	.	.	.	.	.	.	.	.	.	.	.	.	.	.	.	99.88;99.88	.	.	.	.	.	.	.	.	.
GCA_016484845.1_PDT000821500.1	12	.	.	.	.	.	.	.	.	.	.	.	.	.	.	.	.	.	.	.	.	.	.	.	.	.	.	.	.	.	.	.	.	.	.	.	.	.	.	99.88;99.88	.	.	.	.	.	.	.	.	100.00;100.00
GCA_016484865.1_PDT000821494.1	5	.	.	.	.	.	.	.	.	.	.	.	.	.	.	.	.	.	.	.	.	.	.	.	.	.	.	.	.	.	.	.	.	.	.	.	.	.	.	.	.	.	.	.	.	.	.	.	.
GCA_016484945.1_PDT000751439.1	15	.	.	.	.	.	.	.	.	.	.	.	.	.	.	.	.	.	.	.	.	.	.	.	.	.	.	.	.	.	.	.	.	.	.	.	82.30;82.30	.	.	99.88;99.88	.	.	.	.	.	.	.	.	.
GCA_016484955.1_PDT000751436.1	15	.	.	.	.	.	.	.	.	.	.	.	.	.	.	.	.	.	.	.	.	.	.	.	.	.	.	.	.	.	.	.	.	.	.	.	82.30;82.30	.	.	99.88;99.88	.	.	.	.	.	.	.	.	.
GCA_016484985.1_PDT000751438.1	13	.	.	.	.	.	.	.	.	.	.	.	.	.	.	.	.	.	.	.	.	.	.	.	.	.	.	.	.	.	.	.	.	.	.	.	82.30;82.30	.	.	99.88;99.88	.	.	.	.	.	.	.	.	.
GCA_016485005.1_PDT000751437.1	13	.	.	.	.	.	.	.	.	.	.	.	.	.	.	.	.	.	.	.	.	.	.	.	.	.	.	.	.	.	.	.	.	.	.	.	.	.	.	99.88;99.88	.	.	.	.	.	.	.	.	.
GCA_016485025.1_PDT000751440.1	13	.	.	.	.	.	.	.	.	.	.	.	.	.	.	.	.	.	.	.	.	.	.	.	.	.	.	.	.	.	.	.	.	.	.	.	82.30;82.30	.	.	99.88;99.88	.	.	.	.	.	.	.	.	.
GCA_016485045.1_PDT000751441.1	12	.	.	.	.	.	.	.	.	.	.	.	.	.	.	.	.	.	.	.	.	.	.	.	.	.	.	.	.	.	.	.	.	.	.	.	82.30;82.30	.	.	99.88;99.88	.	.	.	.	.	.	.	.	.
GCA_016485065.1_PDT000762792.1	8	.	.	.	.	.	.	.	.	.	.	.	.	.	.	.	.	.	.	.	.	.	.	.	.	.	.	.	.	.	.	.	.	.	.	.	.	.	.	99.88;99.88	.	.	.	.	.	.	.	.	.
GCA_016485085.1_PDT000751432.1	12	.	.	.	.	.	.	.	.	.	.	.	.	.	.	.	.	.	.	.	.	.	.	.	.	.	.	.	.	.	.	.	.	.	.	.	.	.	.	99.88;99.88	.	.	.	.	.	.	.	.	.
GCA_016485105.1_PDT000751435.1	7	.	.	.	.	.	.	.	.	.	.	.	.	.	.	.	.	.	.	.	.	.	.	.	.	.	.	.	.	.	.	.	.	.	.	.	.	.	.	.	.	.	.	.	.	.	.	.	.
GCA_016485125.1_PDT000751433.1	13	.	.	.	.	.	.	.	.	.	.	.	.	.	.	.	.	.	.	.	.	.	.	.	.	.	.	.	.	.	.	.	.	.	.	.	82.30;82.30	.	.	99.88;99.88	.	.	.	.	.	.	.	.	.
GCA_016485145.1_PDT000751429.1	18	.	.	.	.	.	.	.	.	.	.	100.00;100.00	.	.	.	.	.	.	.	.	.	.	.	.	.	.	82.20	.	.	.	.	.	.	.	.	.	82.51;82.20	.	.	99.88;99.88	.	.	.	.	.	.	.	.	100.00;100.00
GCA_016485165.1_PDT000751431.1	13	.	.	.	.	.	.	.	.	.	.	.	.	.	.	.	.	.	.	.	.	.	.	.	.	.	.	.	.	.	.	.	.	.	.	.	.	.	.	99.88;99.88	.	.	.	.	.	.	.	.	.
GCA_016485185.1_PDT000751430.1	15	.	.	.	.	.	.	.	.	.	.	.	.	.	.	.	.	.	.	.	.	.	.	.	.	.	.	.	.	.	.	.	.	.	.	.	82.30;82.30	.	.	99.88;99.88	.	.	.	.	.	.	.	.	.
GCA_016485205.1_PDT000751428.1	13	.	.	.	.	.	.	.	.	.	.	.	.	.	.	.	.	.	.	.	.	.	.	.	.	.	.	.	.	.	.	.	.	.	.	.	82.30;82.30	.	.	99.88;99.88	.	.	.	.	.	.	.	.	.
GCA_016485225.1_PDT000751424.1	13	.	.	.	.	.	.	.	.	.	.	.	.	.	.	.	.	.	.	.	.	.	.	.	.	.	.	.	.	.	.	.	.	.	.	.	82.30;82.30	.	.	99.88;99.88	.	.	.	.	.	.	.	.	.
GCA_016485245.1_PDT000751423.1	8	.	.	.	.	.	93.03;93.15	.	.	.	.	.	.	.	.	.	.	.	.	.	.	.	.	.	.	.	.	.	.	.	.	.	.	.	.	.	.	.	.	.	.	.	.	.	.	.	.	.	.
GCA_016485265.1_PDT000751425.1	11	.	.	.	.	.	.	.	.	.	.	100.00;100.00	.	.	.	.	.	92.24;92.24	.	.	.	.	.	.	.	.	.	.	.	.	.	.	.	.	.	.	82.51;82.51	.	.	.	.	.	.	.	.	.	.	.	100.00;100.00
GCA_016485285.1_PDT000751426.1	13	.	.	.	.	.	.	.	.	.	.	.	.	.	.	.	.	.	.	.	.	.	.	.	.	.	.	.	.	.	.	.	.	.	.	.	82.30;82.30	.	.	99.88;99.88	.	.	.	.	.	.	.	.	.
GCA_016485305.1_PDT000751427.1	13	.	.	.	.	.	.	.	.	.	.	.	.	.	.	.	.	.	.	.	.	.	.	.	.	.	.	.	.	.	.	.	.	.	.	.	82.30;82.30	.	.	99.88;99.88	.	.	.	.	.	.	.	.	.
GCA_016485325.1_PDT000751422.1	5	.	.	.	.	.	.	.	.	.	.	.	.	.	.	.	.	.	.	.	.	.	.	.	.	.	.	.	.	.	.	.	.	.	.	.	.	.	.	.	.	.	.	.	.	.	.	.	.
GCA_016485345.1_PDT000751420.1	13	.	.	.	.	.	.	.	.	.	.	.	.	.	.	.	.	.	.	.	.	.	.	.	.	.	.	.	.	.	.	.	.	.	.	.	82.30;82.30	.	.	99.88;99.88	.	.	.	.	.	.	.	.	.
GCA_016485365.1_PDT000751421.1	13	.	.	.	.	.	.	.	.	.	.	.	.	.	.	.	.	.	.	.	.	.	.	.	.	.	.	.	.	.	.	.	.	.	.	.	82.30;82.30	.	.	99.88;99.88	.	.	.	.	.	.	.	.	.
GCA_016485385.1_PDT000751419.1	9	.	.	.	.	.	.	100.00;100.00	.	.	.	.	.	.	.	.	.	.	.	.	.	.	.	.	.	.	.	.	.	.	.	.	.	.	.	.	.	.	.	99.88;99.88	.	.	.	.	.	.	.	.	.
GCA_016485405.1_PDT000751417.1	13	.	.	.	.	.	.	.	.	.	.	.	.	.	100.00;100.00	.	.	.	.	.	.	.	.	.	.	.	.	.	.	.	.	.	.	.	.	.	.	.	.	99.88;99.88	.	.	.	.	.	.	.	.	100.00;100.00
GCA_016485415.1_PDT000751408.1	9	.	.	.	.	.	.	.	.	.	.	89.33;97.00	.	.	100.00;100.00	.	.	.	.	.	.	.	.	.	.	.	.	.	.	.	.	.	.	.	.	.	.	.	.	99.88;99.88	.	.	.	.	.	.	.	.	.
GCA_016485445.1_PDT000751416.1	13	.	.	.	.	.	100.00;100.00	.	.	.	.	.	.	.	.	100.00;100.00	.	.	.	.	.	.	.	.	.	.	.	.	.	.	.	.	.	.	.	.	.	.	.	99.88;99.88	.	.	.	.	.	.	.	.	.
GCA_016485465.1_PDT000751407.1	9	.	.	.	.	.	.	.	.	.	.	.	.	.	.	.	.	.	.	.	.	.	.	.	.	.	.	.	.	.	.	100.00;100.00	.	.	.	.	.	.	.	99.88;99.88	.	.	.	.	.	.	.	.	100.00;100.00
GCA_016485485.1_PDT000751415.1	9	.	.	.	.	.	.	.	.	.	.	.	.	.	.	100.00;100.00	.	.	.	.	.	.	.	.	.	.	.	.	.	.	.	.	.	.	.	.	.	.	.	99.88;99.88	.	.	.	.	.	.	.	.	.
GCA_016485505.1_PDT000751418.1	11	.	.	.	.	.	.	.	.	.	.	.	.	.	.	.	.	.	.	.	.	.	.	.	.	.	.	.	.	.	.	.	.	.	.	.	.	.	.	99.88;99.88	.	.	.	.	.	.	.	.	.
GCA_016485525.1_PDT000751412.1	8	.	.	.	.	.	.	.	.	.	.	.	.	.	.	.	.	.	.	.	.	.	.	.	.	.	.	.	.	.	.	.	.	.	.	.	.	.	.	99.88;99.88	.	.	.	.	.	.	.	.	.
GCA_016485545.1_PDT000751411.1	8	.	.	.	.	.	.	.	.	.	.	.	.	.	.	.	.	.	.	.	.	.	.	.	.	.	.	.	.	.	.	.	100.00;100.00	.	.	.	.	.	.	.	.	.	.	.	.	.	.	.	.
GCA_016485555.1_PDT000751413.1	17	.	.	.	.	.	.	.	.	.	.	.	.	.	.	.	.	.	.	.	.	.	.	.	.	.	.	.	.	.	.	.	.	.	.	.	82.51;82.51	.	.	99.88;99.88	.	.	.	.	.	.	.	.	100.00;100.00
GCA_016485585.1_PDT000751414.1	9	.	.	.	.	.	.	.	.	.	.	.	.	.	.	100.00;100.00	.	.	.	.	.	.	.	.	.	.	.	.	.	.	.	.	.	.	.	.	.	.	.	99.88;99.88	.	.	.	.	.	.	.	.	.
GCA_016485605.1_PDT000751409.1	9	.	.	.	.	.	.	.	.	.	.	.	.	.	100.00;100.00	.	.	.	.	.	.	.	.	.	.	.	.	.	.	.	.	.	.	.	.	.	.	.	.	99.88;99.88	.	.	.	.	.	.	.	.	.
GCA_016485625.1_PDT000751410.1	17	.	.	.	.	.	.	.	.	.	.	.	.	.	.	.	.	.	.	.	.	.	.	.	.	.	.	.	.	.	.	.	100.00;100.00	.	.	.	82.51;82.51	.	.	99.88;99.88	.	.	.	.	.	.	.	.	100.00;100.00
GCA_016485645.1_PDT000751403.1	11	.	.	.	.	.	.	.	.	.	.	100.00;100.00	.	.	.	.	.	.	.	.	.	.	.	.	.	.	.	.	.	.	.	.	.	.	.	.	82.51;82.51	.	.	.	.	.	.	.	.	.	.	.	.
GCA_016485665.1_PDT000751399.1	12	.	.	.	.	.	100.00;100.00	.	.	.	.	.	.	.	.	100.00;100.00	.	.	.	.	.	.	.	.	.	.	.	.	.	.	.	.	.	.	.	.	.	.	.	99.88;99.88	.	.	.	.	.	.	.	.	.
GCA_016485685.1_PDT000751401.1	14	.	.	.	.	.	.	.	.	.	.	.	.	.	.	.	.	.	.	.	.	.	.	.	.	.	.	.	.	.	.	.	.	.	.	.	82.51;82.51	.	.	99.88;99.88	.	.	.	.	.	.	.	.	.
GCA_016485705.1_PDT000751404.1	15	.	.	.	.	.	.	.	.	.	.	100.00;100.00	.	.	.	.	.	.	.	.	.	.	.	.	.	.	.	.	.	.	.	.	.	.	.	.	82.51;82.51	.	.	99.88;99.88	.	.	.	.	.	.	.	.	89.58;89.83
GCA_016485725.1_PDT000751402.1	12	.	.	.	.	.	100.00;100.00	.	.	.	.	.	.	.	.	100.00;100.00	.	.	.	.	.	.	.	.	.	.	.	.	.	.	.	.	.	.	.	.	.	.	.	99.88;99.88	.	.	.	.	.	.	.	.	.
GCA_016485745.1_PDT000751400.1	5	.	.	.	.	.	.	.	.	.	.	.	.	.	.	.	.	.	.	.	.	.	.	.	.	.	.	.	.	.	.	.	.	.	.	.	.	.	.	.	.	.	.	.	.	.	.	.	.
GCA_016485765.1_PDT000751398.1	6	.	.	.	.	.	.	.	.	.	.	.	.	.	.	.	.	.	.	.	.	.	.	.	.	.	.	.	.	.	.	.	100.00;100.00	.	.	.	.	.	.	.	.	.	.	.	.	.	.	.	.
GCA_016485785.1_PDT000751396.1	11	.	.	.	.	.	100.00;100.00	.	.	.	.	.	.	.	.	100.00;100.00	.	.	.	.	.	.	.	.	.	.	.	.	.	.	.	.	.	.	.	.	.	.	.	99.88;99.88	.	.	.	.	.	.	.	.	.
GCA_016485805.1_PDT000751397.1	7	.	.	.	.	.	.	.	.	.	.	.	.	.	.	100.00;100.00	.	.	.	.	.	.	.	.	.	.	.	.	.	.	.	.	.	.	.	.	.	.	.	.	.	.	.	.	.	.	.	.	.
GCA_016485825.1_PDT000751392.1	7	.	.	.	.	.	.	.	.	.	.	.	.	.	.	.	.	.	.	.	.	.	.	.	.	.	.	.	.	.	.	.	100.00;100.00	.	.	.	.	.	.	.	.	.	.	.	.	.	.	.	.
GCA_016485845.1_PDT000751393.1	14	.	.	.	.	.	.	.	.	.	.	100.00;100.00	.	.	.	.	.	.	.	.	.	.	.	.	.	79.42	.	.	.	.	.	.	.	.	.	.	82.51;82.51	.	.	99.88;99.88	.	.	.	.	.	.	.	.	89.71;89.83
GCA_016485865.1_PDT000751387.1	16	.	.	.	.	.	.	.	.	.	.	.	.	.	.	.	.	.	.	.	.	.	.	.	.	.	.	.	.	.	.	.	.	.	.	.	82.51;82.51	.	.	99.88;99.88	.	.	.	.	.	.	.	.	100.00;100.00
GCA_016485885.1_PDT000751386.1	16	.	.	.	.	.	.	.	.	.	.	.	.	.	.	.	.	.	.	.	.	.	.	.	.	.	.	.	.	.	.	.	.	.	.	.	82.51;82.51	.	.	99.88;99.88	.	.	.	.	.	.	.	.	100.00;100.00
GCA_016485905.1_PDT000751388.1	15	.	.	.	.	.	.	.	.	.	.	.	.	.	.	.	.	.	.	.	.	.	.	.	.	.	.	.	.	.	.	.	.	.	.	.	82.51;82.51	.	.	99.88;99.88	.	.	.	.	.	.	.	.	.
GCA_016485925.1_PDT000751379.1	18	.	.	.	.	.	.	.	.	.	.	.	94.13;94.13	.	.	.	.	.	.	.	.	.	.	.	.	.	.	.	.	.	.	.	.	.	.	.	82.51;82.51	.	.	98.63;99.88;99.88	.	.	.	.	.	.	.	.	100.00;100.00
GCA_016485945.1_PDT000751389.1	15	.	.	.	.	.	.	.	.	.	.	.	.	.	.	.	.	.	.	.	.	.	.	.	.	.	.	.	.	.	.	.	.	.	.	.	82.51;82.51	.	.	99.88;99.88	.	.	.	.	.	.	.	.	100.00;100.00
GCA_016485965.1_PDT000751390.1	12	.	.	.	.	.	100.00;100.00	.	.	.	.	.	.	.	.	100.00;100.00	.	.	.	.	.	.	.	.	.	.	.	.	.	.	.	.	.	.	.	.	.	.	.	99.88;99.88	.	.	.	.	.	.	.	.	.
GCA_016485985.1_PDT000751382.1	9	.	.	.	.	.	.	100.00;100.00	.	.	.	.	.	.	.	.	.	.	.	.	.	.	.	.	.	.	.	.	.	.	.	.	.	.	.	.	.	.	.	99.88;92.41;99.88	.	.	.	.	.	.	.	.	100.00;100.00
GCA_016486005.1_PDT000751391.1	7	.	.	.	.	.	.	.	.	.	.	.	.	.	.	.	.	.	.	.	.	.	.	.	.	.	.	.	.	.	.	.	100.00;100.00	.	.	.	.	.	.	.	.	.	.	.	.	.	.	.	.
GCA_016486025.1_PDT000751380.1	16	.	.	.	.	.	.	.	.	.	.	.	.	.	.	.	.	.	.	.	.	.	.	.	.	.	.	.	.	.	.	.	.	.	.	.	82.51;82.51	.	.	99.88;99.88	.	.	.	.	.	.	.	.	100.00;100.00
GCA_016486045.1_PDT000751383.1	12	.	.	.	.	.	.	.	.	.	.	.	.	.	.	.	.	.	.	.	.	.	.	.	.	.	.	.	.	.	.	.	.	.	.	.	.	.	.	99.88;99.88	.	.	.	.	.	.	.	.	100.00;100.00
GCA_016486065.1_PDT000751376.1	13	.	.	.	.	.	.	.	.	.	.	.	.	.	.	.	.	.	.	.	.	.	.	.	.	.	.	.	.	.	.	.	.	.	.	.	.	.	.	99.88;99.88	.	.	.	.	.	.	.	.	100.00;100.00
GCA_016486085.1_PDT000751371.1	7	.	.	.	.	.	.	.	.	.	.	100.00;100.00	.	.	.	.	.	.	.	.	.	.	.	.	.	.	.	.	.	.	.	.	.	.	.	.	82.51;82.51	.	.	.	.	.	.	.	.	.	.	.	.
GCA_016486105.1_PDT000751395.1	9	.	.	.	.	.	92.92;93.15	.	.	.	.	.	.	.	.	.	.	.	.	.	.	.	.	.	.	.	.	.	.	.	.	.	.	.	.	.	.	.	.	.	.	.	.	.	.	.	.	.	.
GCA_016486125.1_PDT000751369.1	13	.	.	.	.	.	.	.	.	.	.	.	.	.	.	.	.	.	.	.	.	.	.	.	.	.	.	.	.	.	.	.	.	.	.	.	.	.	.	99.88;99.88	.	.	.	.	.	.	.	.	100.00;100.00
GCA_016486145.1_PDT000751360.1	11	.	.	.	.	.	.	100.00;100.00	.	.	.	.	.	.	.	.	.	.	.	.	.	.	.	.	.	.	.	.	.	.	.	.	.	.	.	.	.	.	.	99.88;99.88	.	.	.	.	.	.	.	.	100.00;100.00
GCA_016486155.1_PDT000751356.1	9	.	.	.	.	.	.	.	.	.	.	.	.	.	.	.	.	.	.	.	.	.	.	.	.	.	.	.	.	.	.	.	.	.	.	.	.	.	.	99.88;99.88	.	.	.	.	.	.	.	.	.
GCA_016486165.1_PDT000751338.1	7	.	.	.	.	.	.	.	.	.	.	.	.	.	.	.	.	.	.	.	.	.	.	.	.	.	.	.	.	.	.	.	.	.	.	.	.	.	.	99.88;99.88	.	.	.	.	.	.	.	.	.
GCA_016486205.1_PDT000751351.1	12	.	.	.	.	.	.	.	.	.	.	.	.	.	.	.	.	.	.	.	.	.	.	.	.	.	.	.	.	.	.	.	.	.	.	.	.	.	.	99.88;99.88	.	.	.	.	.	.	.	.	100.00;100.00
GCA_016486245.1_PDT000751350.1	13	.	.	.	.	.	.	.	.	.	.	.	.	.	.	.	.	.	.	.	.	.	.	.	.	.	.	.	.	.	.	.	.	.	.	.	.	.	.	99.88;99.88	.	.	.	.	.	.	.	.	100.00;100.00
GCA_016486265.1_PDT000751339.1	5	.	.	.	.	.	.	.	.	.	.	.	.	.	.	.	.	.	.	.	.	.	.	.	.	.	.	.	.	.	.	.	.	.	.	.	.	.	.	.	.	.	.	.	.	.	.	.	.
GCA_016486285.1_PDT000751349.1	9	.	.	.	.	.	.	.	.	.	.	.	.	.	.	.	.	.	.	.	.	.	.	.	.	.	.	.	.	.	.	.	.	.	.	.	.	.	.	99.88;99.88	.	.	.	.	.	.	.	.	100.00;100.00
GCA_016486305.1_PDT000751337.1	8	.	.	.	.	.	.	.	.	.	.	.	.	.	.	.	.	.	.	.	.	.	.	.	.	.	.	.	.	.	.	.	.	.	.	.	.	.	.	.	.	.	.	.	.	.	.	.	.
GCA_016486325.1_PDT000751333.1	17	.	.	.	.	.	.	.	.	.	.	100.00;96.63	.	.	.	.	.	.	.	.	.	.	.	.	.	.	.	.	97.92;97.92	.	.	.	.	.	.	.	82.51;82.51	.	.	.	.	.	.	.	.	.	.	.	100.00;100.00
GCA_016486345.1_PDT000751334.1	18	.	100.00;100.00	.	.	.	100.00;100.00	.	.	.	.	.	.	.	.	100.00;100.00	.	.	.	.	.	.	.	.	.	.	.	.	.	.	.	.	.	.	.	.	.	.	.	99.88;99.88	.	.	.	.	.	.	.	.	.
GCA_016486365.1_PDT000751331.1	12	.	.	.	.	.	.	.	.	.	.	.	.	.	.	.	.	.	.	.	.	.	.	.	.	.	.	.	.	.	100.00;100.00	.	.	.	.	.	.	.	.	.	.	.	.	.	.	.	.	.	.
GCA_016486385.1_PDT000751336.1	6	.	.	.	.	.	.	.	.	.	.	.	.	.	.	.	.	.	.	.	.	.	.	.	.	.	.	.	.	.	.	.	100.00;100.00	.	.	.	.	.	.	.	.	.	.	.	.	.	.	.	.
GCA_016486405.1_PDT000751327.1	18	.	.	.	.	.	.	.	.	.	.	.	.	.	.	.	.	.	.	.	.	.	.	.	.	.	92.42	.	.	.	.	.	.	.	.	.	82.51;82.51	.	.	99.88;99.88	.	.	.	.	.	.	.	.	100.00;100.00
GCA_016486425.1_PDT000751326.1	11	.	.	.	.	.	.	.	.	.	.	.	.	.	.	100.00;100.00	.	.	.	.	.	.	.	.	.	.	.	.	.	.	.	.	.	.	.	.	.	.	.	.	.	.	.	.	.	.	.	.	.
GCA_016486445.1_PDT000751321.1	5	.	.	.	.	.	.	.	.	.	.	.	.	.	.	.	.	.	.	.	.	.	.	.	.	.	.	.	.	.	.	.	100.00;100.00	.	.	.	.	.	.	.	.	.	.	.	.	.	.	.	.
GCA_016486465.1_PDT000751318.1	16	.	.	.	.	.	.	.	.	.	.	.	.	.	.	.	.	.	.	.	.	.	.	.	.	.	.	.	.	.	.	.	.	.	.	.	82.51;82.51	.	.	99.88;99.88	.	.	.	.	.	.	.	.	100.00;100.00
GCA_016486485.1_PDT000751323.1	15	.	.	.	.	.	.	.	.	.	.	.	.	.	.	.	.	.	.	.	.	.	.	.	.	.	.	.	.	.	.	.	.	.	.	.	82.51;82.51	.	.	99.88;99.88	.	.	.	.	.	.	.	.	100.00;100.00
GCA_016486505.1_PDT000751319.1	8	.	.	.	.	.	100.00;100.00	.	.	.	.	.	.	.	.	100.00;100.00	.	.	.	.	.	.	.	.	.	.	.	.	.	.	.	.	.	.	.	.	.	.	.	.	.	.	.	.	.	.	.	.	.
GCA_016486525.1_PDT000751316.1	11	.	.	.	.	.	.	.	.	.	.	.	.	.	.	.	.	.	.	.	.	.	.	.	.	.	.	.	.	.	.	.	100.00;100.00	.	.	.	82.30;82.30	.	.	99.88;99.88	.	.	.	.	.	.	.	.	.
GCA_016486545.1_PDT000751317.1	13	.	.	.	.	.	.	.	.	.	.	89.33;97.00	.	.	100.00;100.00	.	.	.	.	.	.	.	.	.	.	.	.	.	.	.	.	.	.	.	.	.	.	.	.	99.88;99.88	.	.	.	.	.	.	.	.	100.00;100.00
GCA_016486565.1_PDT000751315.1	16	.	.	.	.	.	.	.	.	.	.	100.00;100.00	.	.	.	.	.	.	.	.	.	.	.	.	.	.	.	.	.	.	.	.	.	.	.	.	82.51;82.51	.	.	99.88;99.88	.	.	.	.	.	.	.	.	99.39;99.88
GCA_016486585.1_PDT000751311.1	14	.	.	.	.	.	.	.	.	.	.	.	.	.	100.00;100.00	.	.	.	.	.	.	.	.	.	.	.	.	.	.	.	.	.	.	.	.	.	.	.	.	99.88;99.88	.	.	.	.	.	.	.	.	100.00;100.00
GCA_016486605.1_PDT000751314.1	13	.	.	.	.	.	.	.	.	.	.	.	.	.	.	.	.	.	.	.	.	.	.	.	.	.	.	.	.	.	.	.	.	.	.	.	.	.	.	99.88;71.89	.	.	.	.	.	.	.	.	100.00;100.00
GCA_016486625.1_PDT000751304.1	13	.	.	.	.	.	.	.	.	.	.	.	.	.	.	.	.	.	.	.	.	.	.	.	.	.	.	.	.	.	.	.	.	.	.	.	.	.	.	99.88;99.88	.	.	.	.	.	.	.	.	100.00;100.00
GCA_016486645.1_PDT000751305.1	15	.	.	.	.	.	.	.	.	.	.	100.00;96.25	.	.	.	.	.	.	.	.	.	.	.	.	.	.	.	.	.	.	.	.	.	.	.	.	82.51;82.51	.	.	99.88;99.88	.	.	.	.	.	.	.	.	100.00;100.00
GCA_016486665.1_PDT000751302.1	9	.	.	.	.	.	.	.	.	.	.	89.33;97.00	.	.	100.00;100.00	.	.	.	.	.	.	.	.	.	.	.	.	.	.	.	.	.	.	.	.	.	.	.	.	99.88;99.88	.	.	.	.	.	.	.	.	.
GCA_016486685.1_PDT000751303.1	15	.	.	.	.	.	.	.	.	.	.	.	.	.	.	.	.	.	.	.	.	.	.	.	.	.	.	.	.	.	.	.	.	.	.	.	82.51;82.51	.	.	99.88;99.88	.	.	.	.	.	.	.	.	100.00;100.00
GCA_016486705.1_PDT000751301.1	12	.	.	.	.	.	.	.	.	.	.	.	.	.	100.00;100.00	.	.	.	.	.	.	.	.	.	.	.	.	.	.	.	.	.	.	.	.	.	.	.	.	99.88;99.88	.	.	.	.	.	.	.	.	.
GCA_016486725.1_PDT000751299.1	19	.	90.24;90.24	.	.	.	.	.	.	.	.	.	.	.	.	.	.	.	.	.	.	.	.	.	.	.	.	.	.	.	.	100.00;100.00	.	.	.	.	83.54;83.54	.	.	99.88;73.13	.	.	.	.	.	.	.	.	.
GCA_016486745.1_PDT000751292.1	15	.	.	.	.	.	.	.	.	.	.	.	.	.	.	.	.	.	.	.	.	.	.	.	.	.	.	.	.	.	.	.	.	.	.	.	82.51;82.51;82.51	.	.	99.88;99.88	.	.	.	.	.	.	.	.	100.00;100.00
GCA_016486765.1_PDT000751294.1	15	.	.	.	.	.	.	.	.	.	.	.	.	.	.	.	.	.	.	.	.	.	.	.	.	.	.	.	.	.	.	.	.	.	.	.	82.51;82.51	.	.	99.88;99.88	.	.	.	.	.	.	.	.	100.00;100.00
GCA_016486785.1_PDT000751295.1	16	.	.	.	.	.	.	.	.	.	.	.	.	.	.	.	.	.	.	.	.	.	.	.	.	.	.	.	.	.	.	.	.	.	.	.	82.51;82.51	.	.	99.88;99.88	.	.	.	.	.	.	.	.	100.00;100.00
GCA_016486795.1_PDT000751293.1	15	.	.	.	.	.	.	.	.	.	.	.	.	.	.	.	.	.	.	.	.	.	.	.	.	.	.	.	.	.	.	.	.	.	.	.	82.51;82.51	.	.	99.88;99.88	.	.	.	.	.	.	.	.	100.00;100.00
GCA_016486825.1_PDT000751300.1	10	.	.	.	.	.	.	.	.	.	.	.	.	.	.	.	.	.	.	.	.	.	.	.	.	.	.	.	.	.	.	.	.	.	.	.	.	.	.	99.88;99.88	.	.	.	.	.	.	.	.	.
GCA_016486845.1_PDT000751291.1	13	.	.	.	.	.	.	.	.	.	.	.	.	.	.	.	.	.	.	.	.	.	.	.	.	.	.	.	.	.	.	.	.	.	.	.	.	.	.	99.88;99.88	.	.	.	.	.	.	.	.	100.00;100.00
GCA_016486865.1_PDT000751290.1	15	.	.	.	.	.	.	.	.	.	.	.	.	.	.	.	.	.	.	.	.	.	.	.	.	.	81.31;81.82	.	.	.	.	.	.	.	.	.	.	.	.	99.88;99.88	.	.	.	.	.	.	.	.	100.00;100.00
GCA_016486885.1_PDT000751298.1	7	.	.	.	.	.	.	.	.	.	.	.	.	.	.	.	.	.	.	.	.	.	.	.	.	.	.	.	.	.	.	.	.	.	.	.	.	.	.	99.88;99.88	.	.	.	.	.	.	.	.	.
GCA_016486905.1_PDT000751296.1	16	.	.	.	.	.	.	.	.	.	.	.	.	.	.	.	.	.	.	.	.	.	.	.	.	.	.	.	.	.	.	.	.	.	.	.	82.51;82.51	.	.	99.88;99.88	.	.	.	.	.	.	.	.	100.00;100.00
GCA_016486925.1_PDT000751289.1	13	.	.	.	.	.	.	.	.	.	.	100.00;100.00	.	.	.	.	.	.	.	.	.	.	.	.	.	.	.	.	.	.	.	.	.	.	.	.	82.51;82.51	.	.	99.88;99.88	.	.	.	.	.	.	.	.	100.00;100.00
GCA_016486945.1_PDT000751285.1	10	.	.	.	.	.	.	.	.	.	.	.	.	.	.	.	.	.	.	.	.	.	.	.	.	.	.	.	.	.	.	.	.	.	.	.	.	.	.	99.88;72.64;99.88	.	.	.	.	.	.	.	.	.
GCA_016486965.1_PDT000751288.1	12	.	.	.	.	.	.	.	.	.	.	.	.	.	.	.	.	.	.	.	.	.	.	.	.	.	.	.	.	.	.	.	.	.	.	.	82.30;82.30	.	.	99.88;99.88	.	.	.	.	.	.	.	.	.
GCA_016486985.1_PDT000751287.1	13	.	.	.	.	.	.	.	.	.	.	.	.	.	.	.	.	.	.	.	.	.	.	.	.	.	.	.	.	.	.	.	.	.	.	.	.	.	.	99.88;99.88	.	.	.	.	.	.	.	.	100.00;100.00
GCA_016487005.1_PDT000751283.1	16	.	.	.	.	.	.	.	.	.	.	.	.	.	.	.	.	.	.	.	.	.	.	.	.	.	78.41	.	.	.	.	.	.	.	.	.	82.51;82.51	.	.	99.88;99.88	.	.	.	.	.	.	.	.	100.00;100.00
GCA_016487025.1_PDT000751284.1	15	.	.	.	.	.	.	.	.	.	.	.	.	.	.	.	.	.	.	.	.	.	.	.	.	.	.	.	.	.	.	.	.	.	.	.	82.51;82.51;82.51;75.31	.	.	99.88;99.88;99.88	.	.	.	.	.	.	.	.	100.00;100.00
GCA_016487045.1_PDT000751281.1	14	.	.	.	.	.	.	.	.	.	.	.	.	.	100.00;100.00	.	.	.	.	.	.	.	.	.	.	.	.	.	.	.	.	.	.	.	.	.	.	.	.	99.88;99.88	.	.	.	.	.	.	.	.	.
GCA_016487065.1_PDT000751282.1	11	.	.	.	.	.	.	.	.	.	.	.	.	.	.	.	.	.	.	.	.	.	.	.	.	.	.	.	.	.	.	.	.	.	.	.	.	.	.	99.88;99.88	.	.	.	.	.	.	.	.	.
GCA_016487085.1_PDT000751279.1	12	.	.	.	.	.	.	.	.	.	.	.	.	.	.	.	.	.	.	.	.	.	.	.	.	.	.	.	.	.	.	.	.	.	.	.	.	.	.	99.88;99.88	.	.	.	.	.	.	.	.	100.00;100.00
GCA_016487105.1_PDT000751278.1	18	.	.	.	.	.	.	.	.	.	.	.	.	.	.	.	.	.	.	.	.	.	.	.	.	.	91.92	.	.	.	.	.	.	.	.	.	82.51;82.51	.	.	99.88;99.88	.	.	.	.	.	.	.	.	100.00;100.00
GCA_016487125.1_PDT000751280.1	12	.	.	.	.	.	.	.	.	.	.	.	.	.	.	.	.	.	.	.	.	.	.	.	.	.	.	.	.	.	.	.	.	.	.	.	.	.	.	99.88;99.88	.	.	.	.	.	.	.	.	100.00;100.00
GCA_016487145.1_PDT000751276.1	15	.	.	.	.	.	.	.	.	.	.	.	.	.	.	.	.	.	.	.	.	.	.	.	.	.	.	.	.	.	.	.	.	.	.	.	82.51;82.51	.	.	99.88;99.88	.	.	.	.	.	.	.	.	100.00;100.00
GCA_016487155.1_PDT000751277.1	11	.	.	.	.	.	.	.	.	.	.	.	.	.	.	.	.	.	.	.	.	.	.	.	.	.	.	.	.	.	.	.	100.00;100.00	.	.	.	.	.	.	99.88;72.39	.	.	.	.	.	.	.	.	100.00;100.00
GCA_016487185.1_PDT000751269.1	8	.	.	.	.	.	.	.	.	.	.	.	.	.	.	.	.	.	.	.	.	.	.	.	.	.	.	.	.	.	.	.	100.00;100.00	.	.	.	.	.	.	.	.	.	.	.	.	.	.	.	.
GCA_016487205.1_PDT000751271.1	8	.	.	.	.	.	.	.	.	.	.	.	.	.	.	.	.	.	.	.	.	.	.	.	.	.	.	.	.	.	.	.	100.00;100.00	.	.	.	.	.	.	.	.	.	.	.	.	.	.	.	.
GCA_016487215.1_PDT000751270.1	5	.	.	.	.	.	.	.	.	.	.	.	.	.	.	.	.	.	.	.	.	.	.	.	.	.	.	.	.	.	.	.	.	.	.	.	.	.	.	.	.	.	.	.	.	.	.	.	.
GCA_016487245.1_PDT000751268.1	5	.	.	.	.	.	.	.	.	.	.	.	.	.	.	.	.	.	.	.	.	.	.	.	.	.	.	.	.	.	.	.	.	.	.	.	.	.	.	.	.	.	.	.	.	.	.	.	.
GCA_016487265.1_PDT000751272.1	5	.	.	.	.	.	.	.	.	.	.	.	.	.	.	.	.	.	.	.	.	.	.	.	.	.	.	.	.	.	.	.	.	.	.	.	.	.	.	.	.	.	.	.	.	.	.	.	.
GCA_016487285.1_PDT000751267.1	13	.	.	.	.	.	.	.	.	.	.	.	.	.	.	.	.	.	.	.	.	.	.	.	.	.	.	.	.	.	.	.	.	.	.	.	.	.	.	99.88;99.88	.	.	.	.	.	.	.	.	86.03;86.27
GCA_016487305.1_PDT000751275.1	8	.	.	.	.	.	.	.	.	.	.	100.00;100.00	.	.	.	.	.	.	.	.	.	.	.	.	.	.	.	.	.	.	.	.	.	.	.	.	82.51;82.51	.	.	.	.	.	.	.	.	.	.	.	.
GCA_016487325.1_PDT000751274.1	10	.	.	.	.	.	.	.	.	.	.	89.33;97.00	.	.	100.00;100.00	.	.	.	.	.	.	.	.	.	.	.	.	.	.	.	.	.	.	.	.	.	.	.	.	99.88;99.88	.	.	.	.	.	.	.	.	.
GCA_016487345.1_PDT000751273.1	15	.	.	.	.	.	.	.	.	.	.	.	.	.	.	.	.	.	.	.	.	.	.	.	.	.	.	.	.	.	.	.	.	.	.	.	82.51;82.51;82.51	.	.	99.88;99.88	.	.	.	.	.	.	.	.	100.00;100.00
GCA_016487365.1_PDT000751266.1	9	.	.	.	.	.	.	.	.	.	.	100.00;100.00	.	.	.	.	.	.	.	.	.	.	.	.	.	.	.	.	.	.	.	.	.	.	.	.	82.51;82.51	.	.	.	.	.	.	.	.	.	.	.	100.00;100.00
GCA_016487385.1_PDT000751264.1	6	.	.	.	.	.	.	.	.	.	.	.	.	.	.	.	.	.	.	.	.	.	.	.	.	.	.	.	.	.	.	.	.	.	.	.	.	.	.	.	.	.	.	.	.	.	.	.	.
GCA_016487405.1_PDT000751265.1	14	.	.	.	.	.	.	.	.	.	.	.	.	.	100.00;100.00	.	.	.	.	.	.	.	.	.	.	.	.	.	.	.	.	.	.	.	.	.	.	.	.	99.88;99.88	.	.	.	.	.	.	.	.	.
GCA_016487425.1_PDT000751263.1	12	.	.	.	.	.	.	.	.	.	.	.	.	.	.	.	.	.	.	.	.	.	.	.	.	.	.	.	.	.	.	.	.	.	.	.	.	.	.	99.88;99.88	.	.	.	.	.	.	.	.	100.00;100.00
GCA_016487445.1_PDT000751261.1	16	.	.	.	.	.	.	.	.	.	.	.	.	.	.	.	.	.	.	.	.	.	.	.	.	.	.	.	.	.	.	.	.	.	.	.	82.51;82.51	.	.	99.88;99.88	.	.	.	.	.	.	.	.	100.00;100.00
GCA_016487465.1_PDT000751258.1	14	.	.	.	.	.	.	.	.	.	.	.	.	.	.	.	.	.	.	.	.	.	.	.	.	.	.	.	.	.	.	.	.	.	.	.	.	.	.	99.88;99.88	.	.	.	.	.	.	.	.	100.00;100.00
GCA_016487485.1_PDT000751260.1	9	.	.	.	.	.	.	.	.	.	.	.	.	.	.	.	.	.	.	.	.	.	.	.	.	.	.	.	97.92;97.92	.	.	100.00;100.00	.	.	.	.	.	.	.	.	.	.	.	.	.	.	.	.	.
GCA_016487505.1_PDT000751259.1	9	.	.	.	.	.	.	.	.	.	.	.	.	.	.	100.00;100.00	.	.	.	.	.	.	.	.	.	.	.	.	.	.	.	.	.	.	.	.	.	.	.	99.88;99.88	.	.	.	.	.	.	.	.	.
GCA_016487525.1_PDT000751257.1	14	.	.	.	.	.	.	.	.	.	.	.	.	.	.	.	.	.	.	.	.	.	.	.	.	.	.	.	.	.	.	.	.	.	.	.	.	.	.	99.88;99.88	.	.	.	.	.	.	.	.	100.00;100.00
GCA_016487565.1_PDT000751255.1	10	.	.	.	.	.	93.03;93.15;93.15	.	.	.	.	.	.	.	.	.	.	.	.	.	.	.	.	.	.	.	.	.	.	.	.	.	.	.	.	.	.	.	.	99.88;99.88	.	.	.	.	.	.	.	.	.
GCA_016487625.1_PDT000751248.1	12	.	.	.	.	.	.	.	.	.	.	.	.	.	.	.	.	.	.	.	.	.	.	.	.	.	.	.	.	.	.	.	.	.	.	.	.	.	.	99.88;99.88	.	.	.	.	.	.	.	.	100.00;100.00
GCA_016487645.1_PDT000751250.1	4	.	.	.	.	.	.	.	.	.	.	.	.	.	.	.	.	.	.	.	.	.	.	.	.	.	.	.	.	.	.	.	.	.	.	.	.	.	.	.	.	.	.	.	.	.	.	.	.
GCA_016487665.1_PDT000751246.1	12	.	.	.	.	.	.	.	.	.	.	100.00;100.00	.	.	.	.	.	.	.	.	.	.	.	.	.	.	.	.	.	.	.	.	.	.	.	.	82.51;82.51	.	.	99.88;99.88	.	.	.	.	.	.	.	.	.
GCA_016487685.1_PDT000751253.1	11	.	.	.	.	.	.	.	.	.	.	89.33;97.00	.	.	100.00;100.00	.	.	.	.	.	.	.	.	.	.	.	.	.	.	.	.	.	.	.	.	.	.	.	.	99.88;99.88	.	.	.	.	.	.	.	.	.
GCA_016487705.1_PDT000751249.1	10	.	.	.	.	.	.	.	.	.	.	.	.	.	.	.	.	.	.	.	.	.	.	.	.	.	.	.	97.92;97.92	.	.	100.00;100.00	.	.	.	.	.	.	.	.	.	.	.	.	.	.	.	.	.
GCA_016487725.1_PDT000751254.1	5	.	.	.	.	.	.	.	.	.	.	.	.	.	.	.	.	.	.	.	.	.	.	.	.	.	.	.	.	.	.	.	.	.	.	.	.	.	.	.	.	.	.	.	.	.	.	.	.
GCA_016487745.1_PDT000751245.1	9	.	.	.	.	.	.	.	.	.	.	.	.	.	.	.	.	.	.	.	.	.	.	.	.	.	.	.	97.92;97.92	.	.	100.00;100.00	.	.	.	.	.	.	.	.	.	.	.	.	.	.	100.00;100.00	.	.
GCA_016487765.1_PDT000751244.1	7	.	.	.	.	.	.	.	.	.	.	.	.	.	.	.	.	.	.	.	.	.	.	.	.	.	.	.	.	.	.	.	100.00;100.00	.	.	.	.	.	.	.	.	.	.	.	.	.	.	.	.
GCA_016487785.1_PDT000751243.1	9	.	.	.	.	.	.	.	.	.	.	.	.	.	.	100.00;100.00	.	.	.	.	.	.	.	.	.	.	.	.	.	.	.	.	.	.	.	.	.	.	.	99.88;99.88	.	.	.	.	.	.	.	.	.
GCA_016487805.1_PDT000750266.1	15	.	.	.	.	.	.	.	.	.	.	.	.	.	.	.	.	.	.	.	.	.	.	.	.	.	.	.	.	.	.	.	.	.	.	.	82.51;82.51	.	.	99.88;99.88	.	.	.	.	.	.	.	.	100.00;100.00
GCA_016487825.1_PDT000750264.1	15	.	.	.	.	.	.	.	.	.	.	.	.	.	.	.	.	.	.	.	.	.	.	.	.	.	.	.	.	.	.	.	.	.	.	.	82.51;82.51	.	.	99.88;99.88	.	.	.	.	.	.	.	.	100.00;100.00
GCA_016487845.1_PDT000750265.1	15	.	.	.	.	.	.	.	.	.	.	.	.	.	.	.	.	.	.	.	.	.	.	.	.	.	.	.	.	.	.	.	.	.	.	.	82.51;82.51	.	.	99.88;99.88	.	.	.	.	.	.	.	.	100.00;100.00
GCA_016487865.1_PDT000750258.1	10	.	.	.	.	.	.	.	.	.	.	.	.	.	.	.	.	.	.	.	.	.	.	.	.	.	.	.	.	.	.	.	.	.	.	.	.	.	.	99.88;99.88	.	.	.	.	.	.	.	.	.
GCA_016487885.1_PDT000750259.1	16	.	.	.	.	.	.	.	.	.	.	.	.	.	.	.	.	.	.	.	.	.	.	.	.	.	.	.	.	.	.	.	.	.	.	.	82.51;82.51	.	.	99.88;99.88	.	.	.	.	.	.	.	.	100.00;100.00
GCA_016487905.1_PDT000750252.1	16	.	.	.	.	.	.	.	.	.	.	.	.	.	.	.	.	.	.	.	.	.	.	.	.	.	92.93	.	.	.	.	.	.	.	.	.	82.51;82.51	.	.	99.88;99.88	.	.	.	.	.	.	.	.	100.00;100.00
GCA_016487925.1_PDT000750249.1	15	.	.	.	.	.	.	.	.	.	.	.	.	.	.	.	.	.	.	.	.	.	.	.	.	.	.	.	.	.	.	.	.	.	.	.	82.51;82.51	.	.	99.88;99.88	.	.	.	.	.	.	.	.	100.00;100.00
GCA_016487945.1_PDT000750253.1	15	.	.	.	.	.	.	.	.	.	.	.	.	.	.	.	.	.	.	.	.	.	.	.	.	.	.	.	.	.	.	.	.	.	.	.	82.51;82.51	.	.	99.88;99.88;99.88	.	.	.	.	.	.	.	.	100.00;100.00
GCA_016487965.1_PDT000750251.1	15	.	.	.	.	.	.	.	.	.	.	.	.	.	.	.	.	.	.	.	.	.	.	.	.	.	.	.	.	.	.	.	.	.	.	.	82.51;82.51	.	.	99.88;99.88	.	.	.	.	.	.	.	.	100.00;100.00
GCA_016487985.1_PDT000750244.1	15	.	.	.	.	.	.	.	.	.	.	.	.	.	.	.	.	.	.	.	.	.	.	.	.	.	.	.	.	.	.	.	.	.	.	.	82.51;82.51	.	.	99.88;99.88	.	.	.	.	.	.	.	.	100.00;100.00
GCA_016488005.1_PDT000750243.1	15	.	.	.	.	.	.	.	.	.	.	.	.	.	.	.	.	.	.	.	.	.	.	.	.	.	.	.	.	.	.	.	.	.	.	.	82.51;82.51	.	.	99.88;99.88	.	.	.	.	.	.	.	.	100.00;100.00
GCA_016488025.1_PDT000750236.1	14	.	.	.	.	.	.	.	.	.	.	100.00;100.00	.	.	.	.	.	.	.	.	.	.	.	.	.	.	.	.	.	.	.	.	.	.	.	.	82.51;82.51	.	.	99.88;99.88	.	.	.	.	.	.	.	.	100.00;100.00
GCA_016488045.1_PDT000750212.1	14	.	.	.	.	.	.	.	.	.	.	100.00;100.00	.	.	.	.	.	.	.	.	.	.	.	.	.	.	.	.	.	.	.	.	.	.	.	.	82.51;82.51	.	.	99.88;99.88;99.88	.	.	.	.	.	.	.	.	100.00;100.00
GCA_016488065.1_PDT000750213.1	14	.	.	.	.	.	.	.	.	.	.	100.00;100.00	.	.	.	.	.	.	.	.	.	.	.	.	.	.	.	.	.	.	.	.	.	.	.	.	82.51;82.51	.	.	99.88;99.88	.	.	.	.	.	.	.	.	100.00;100.00
GCA_016488085.1_PDT000750217.1	15	.	.	.	.	.	.	.	.	.	.	.	.	.	.	.	.	.	.	.	.	.	.	.	.	.	.	.	.	.	.	.	.	.	.	.	82.51;82.51	.	.	99.88;99.88	.	.	.	.	.	.	.	.	100.00;100.00
GCA_016488105.1_PDT000750220.1	15	.	.	.	.	.	.	.	.	.	.	.	.	.	.	.	.	.	.	.	.	.	.	.	.	.	.	.	.	.	.	.	.	.	.	.	82.51;82.51	.	.	99.88;99.88	.	.	.	.	.	.	.	.	100.00;100.00
GCA_016488125.1_PDT000750209.1	10	.	.	.	.	.	.	.	.	.	.	.	.	.	.	.	.	.	.	.	.	.	.	.	.	.	.	.	.	.	.	.	100.00;100.00	.	.	.	.	.	.	99.88;99.88	.	.	.	.	.	.	.	.	.
GCA_016488145.1_PDT000750205.1	13	.	.	.	.	.	.	.	.	.	.	89.33;97.00	.	.	100.00;100.00	.	.	.	.	.	.	.	.	.	.	.	.	.	.	.	.	.	.	.	.	.	.	.	.	99.88;99.88	.	.	.	.	.	.	.	.	100.00;100.00
GCA_016488165.1_PDT000750208.1	10	.	.	.	.	.	.	.	.	.	.	.	.	.	.	.	.	.	.	.	.	.	.	.	.	.	.	.	.	.	.	.	100.00;100.00	.	.	.	.	.	.	99.88;97.89;99.88	.	.	.	.	.	.	.	.	.
GCA_016488205.1_PDT000751252.1	10	.	.	.	.	.	.	.	.	.	.	100.00;97.00	.	.	100.00;100.00	.	.	.	.	.	.	.	.	.	.	.	.	.	.	.	.	.	.	.	.	.	.	.	.	99.88;99.88	.	.	.	.	.	.	.	.	.
GCA_016488245.1_PDT000750260.1	15	.	.	.	.	.	.	.	.	.	.	.	.	.	.	.	.	.	.	.	.	.	.	.	.	.	.	.	.	.	.	.	.	.	.	.	82.51;82.51	.	.	99.88;99.88	.	.	.	.	.	.	.	.	100.00;100.00
GCA_016488265.1_PDT000750211.1	10	.	.	.	.	.	.	.	.	.	.	.	.	.	.	.	.	.	.	.	.	.	.	.	.	.	.	.	.	.	.	.	100.00;100.00	.	.	.	.	.	.	99.88;99.88	.	.	.	.	.	.	.	.	.
GCA_016488285.1_PDT000750231.1	15	.	.	.	.	.	.	.	.	.	.	.	.	.	.	.	.	.	.	.	.	.	.	.	.	.	.	.	.	.	.	.	.	.	.	.	82.51;82.51	.	.	99.88;99.88	.	.	.	.	.	.	.	.	100.00;100.00
GCA_016488305.1_PDT000750241.1	15	.	.	.	.	.	.	.	.	.	.	.	.	.	.	.	.	.	.	.	.	.	.	.	.	.	.	.	.	.	.	.	.	.	.	.	82.51;82.51	.	.	99.88;99.88	.	.	.	.	.	.	.	.	100.00;100.00
GCA_016488325.1_PDT000750230.1	14	.	.	.	.	.	.	.	.	.	.	.	.	.	.	.	.	.	.	.	.	.	.	.	.	.	.	.	.	.	.	.	.	.	.	.	82.51;82.51	.	.	99.88;99.88	.	.	.	.	.	.	.	.	100.00;100.00
GCA_016488345.1_PDT000750203.1	14	.	.	.	.	.	.	.	.	.	.	100.00;100.00	.	.	.	.	.	.	.	.	.	.	.	.	.	.	.	.	.	.	.	.	.	.	.	.	82.51;82.51	.	.	99.88;99.88	.	.	.	.	.	.	.	.	100.00;100.00
GCA_016488365.1_PDT000750199.1	15	.	.	.	.	.	.	.	.	.	.	.	.	.	.	.	.	.	.	.	.	.	.	.	.	.	.	.	.	.	.	.	.	.	.	.	82.51;82.51	.	.	99.88;99.88	.	.	.	.	.	.	.	.	100.00;100.00
GCA_016488385.1_PDT000750196.1	15	.	.	.	.	.	.	.	.	.	.	.	.	.	.	.	.	.	.	.	.	.	.	.	.	.	.	.	.	.	.	.	.	.	.	.	82.51;82.51	.	.	99.88;99.88	.	.	.	.	.	.	.	.	100.00;100.00
GCA_016488405.1_PDT000750197.1	15	.	.	.	.	.	.	.	.	.	.	.	.	.	.	.	.	.	.	.	.	.	.	.	.	.	.	.	.	.	.	.	.	.	.	.	82.51;82.51	.	.	99.88;99.88	.	.	.	.	.	.	.	.	100.00;100.00
GCA_016488425.1_PDT000750198.1	13	.	.	.	.	.	.	.	.	.	.	.	.	.	.	.	.	.	.	.	.	.	.	.	.	.	.	.	.	.	.	.	.	.	.	.	.	.	.	99.88;99.88	.	.	.	.	.	.	.	.	100.00;100.00
GCA_016488445.1_PDT000750194.1	16	.	.	.	.	.	.	.	.	.	.	.	.	.	.	.	.	.	.	.	.	.	.	.	.	.	92.68	.	.	.	.	.	.	.	.	.	82.51;82.51	.	.	99.88;99.88	.	.	.	.	.	.	.	.	100.00;100.00
GCA_016488465.1_PDT000750193.1	15	.	.	.	.	.	.	.	.	.	.	.	.	.	.	.	.	.	.	.	.	.	.	.	.	.	.	.	.	.	.	.	.	.	.	.	82.51;82.51	.	.	99.88;99.88	.	.	.	.	.	.	.	.	100.00;100.00
GCA_016488485.1_PDT000750195.1	15	.	.	.	.	.	.	.	.	.	.	.	.	.	.	.	.	.	.	.	.	.	.	.	.	.	.	.	.	.	.	.	.	.	.	.	82.51;82.51	.	.	99.88;99.88	.	.	.	.	.	.	.	.	100.00;100.00
GCA_016488525.1_PDT000750189.1	15	.	.	.	.	.	.	.	.	.	.	.	.	.	.	.	.	.	.	.	.	.	.	.	.	.	.	.	.	.	.	.	.	.	.	.	82.51;82.51	.	.	99.88;99.88	.	.	.	.	.	.	.	.	100.00;100.00
GCA_016488785.1_PDT000733575.1	8	.	.	.	.	.	.	.	.	.	.	.	.	.	.	.	.	.	.	.	.	.	.	.	.	.	.	.	.	.	.	.	.	.	.	.	.	.	.	99.88;99.88	.	.	.	.	.	.	.	.	.
GCA_016488805.1_PDT000733305.1	17	.	.	.	.	.	.	.	.	.	.	89.33;96.63	.	.	100.00;100.00	.	.	.	.	.	.	.	.	.	.	.	.	.	.	.	100.00;100.00	.	.	.	.	.	.	.	.	99.88;99.88	.	.	.	.	.	.	.	.	.
GCA_016488825.1_PDT000733574.1	9	.	.	.	.	.	.	.	.	.	.	.	.	.	.	100.00;100.00	.	.	.	.	.	.	.	.	.	.	.	.	.	.	.	100.00;100.00	.	.	.	.	.	.	.	.	.	.	.	.	.	.	.	.	100.00;100.00
GCA_016488845.1_PDT000733306.1	3	.	.	.	.	.	.	.	.	.	.	.	.	.	.	.	.	.	.	.	.	.	.	.	.	.	.	.	.	.	.	.	.	.	.	.	.	.	.	.	.	.	.	.	.	.	.	.	.
GCA_016488885.1_PDT000733577.1	8	.	.	.	.	.	.	.	.	.	.	.	.	.	.	.	.	.	.	.	.	.	.	.	.	.	.	.	.	.	.	.	.	.	.	.	.	.	.	99.88;99.88	.	.	.	.	.	.	.	.	.
GCA_016488965.1_PDT000733576.1	3	.	.	.	.	.	.	.	.	.	.	.	.	.	.	.	.	.	.	.	.	.	.	.	.	.	.	.	.	.	.	.	.	.	.	.	.	.	.	.	.	.	.	.	.	.	.	.	.
GCA_016488985.1_PDT000733303.1	6	.	.	.	.	.	.	.	.	.	.	.	.	.	.	.	.	.	.	.	.	.	.	.	.	.	.	.	.	.	.	.	.	.	.	.	.	.	.	.	.	.	.	.	.	.	.	.	.
GCA_016489005.1_PDT000733304.1	6	.	.	.	.	.	.	.	.	.	.	.	.	.	.	.	.	.	.	.	.	.	.	.	.	.	.	.	.	.	.	.	.	.	.	.	.	.	.	.	.	.	.	.	.	.	.	.	.
GCA_016489025.1_PDT000733294.1	10	.	.	.	.	.	.	.	.	.	.	.	.	.	.	.	.	.	.	.	.	.	.	.	.	.	.	.	.	.	.	.	.	.	.	.	.	.	.	99.88;99.88	.	.	.	.	.	.	.	.	100.00;100.00
GCA_016489035.1_PDT000733296.1	15	.	.	.	.	.	.	.	.	.	.	.	.	.	.	.	.	.	.	.	.	.	.	.	.	.	.	.	.	.	.	.	.	.	.	.	82.51;82.51	.	.	99.88;99.88	.	.	.	.	.	.	.	.	.
GCA_016489065.1_PDT000733301.1	8	.	.	.	.	.	.	.	.	.	.	.	.	.	.	.	.	.	.	.	.	.	.	.	.	.	.	.	.	.	.	.	.	.	.	.	.	.	.	99.88;99.88	.	.	.	.	.	.	.	.	.
GCA_016489085.1_PDT000733297.1	9	.	.	.	.	.	.	.	.	.	.	.	.	.	.	.	.	.	.	.	.	.	.	.	.	.	.	.	.	.	.	100.00;100.00	.	.	.	.	.	.	.	.	.	.	.	.	.	.	.	.	.
GCA_016489105.1_PDT000733302.1	8	.	.	.	.	.	.	.	.	.	.	.	.	.	.	.	.	.	.	.	.	.	.	.	.	.	.	.	.	.	.	.	.	.	.	.	.	.	.	99.88;99.88	.	.	.	.	.	.	.	.	.
GCA_016489125.1_PDT000733279.1	6	.	.	.	.	.	.	.	.	.	.	.	.	.	.	.	.	.	.	.	.	.	.	.	.	.	.	.	.	.	.	.	.	.	.	.	.	.	.	.	.	.	.	.	.	.	.	.	.
GCA_016489145.1_PDT000733281.1	15	.	.	.	.	.	.	.	.	.	.	.	.	.	.	.	.	.	.	.	.	.	.	.	.	.	.	.	.	.	.	.	.	.	.	.	82.51;82.51	.	.	99.88;99.88	.	.	.	.	.	.	.	.	.
GCA_016489165.1_PDT000733291.1	15	.	.	.	.	.	.	.	.	.	.	.	.	.	.	.	.	.	.	.	.	.	.	.	.	.	.	.	.	.	.	.	.	.	.	.	82.51;82.51	.	.	99.88;99.88	.	.	.	.	.	.	.	.	.
GCA_016489185.1_PDT000733289.1	9	.	.	.	.	.	.	.	.	.	.	.	.	.	.	100.00;100.00	.	.	.	.	.	.	.	.	.	.	.	.	.	.	.	100.00;100.00	.	.	.	.	.	.	.	.	.	.	.	.	.	.	.	.	100.00;100.00
GCA_016489205.1_PDT000733280.1	15	.	.	.	.	.	.	.	.	.	.	.	.	.	.	.	.	.	.	.	.	.	.	.	.	.	.	.	.	.	.	.	.	.	.	.	82.51;82.51	.	.	99.88;99.88	.	.	.	.	.	.	.	.	100.00;100.00
GCA_016489225.1_PDT000733286.1	9	.	.	.	.	.	.	.	.	.	.	.	.	.	.	.	.	.	.	.	.	.	.	.	.	.	.	.	97.92;97.92	.	.	100.00;100.00	.	.	.	.	.	.	.	.	.	.	.	.	.	.	100.00;100.00	.	.
GCA_016489245.1_PDT000733288.1	12	.	.	.	.	.	.	.	.	.	.	.	.	.	.	.	.	.	.	.	.	.	.	.	.	.	.	.	.	.	.	.	.	.	.	.	.	.	.	99.88;99.88	.	.	.	.	.	.	.	.	100.00;100.00
GCA_016489265.1_PDT000733287.1	7	.	.	.	.	.	.	.	.	.	.	.	.	.	.	.	.	.	.	.	.	.	.	.	.	.	.	.	.	.	.	.	.	.	.	.	.	.	.	99.88;99.88	.	.	.	.	.	.	.	.	.
GCA_016489285.1_PDT000733285.1	7	.	.	.	.	.	.	.	.	.	.	.	.	.	.	.	.	.	.	.	.	.	.	.	.	.	.	.	.	.	.	.	.	.	.	.	.	.	.	99.88;99.88	.	.	.	.	.	.	.	.	.
GCA_016489305.1_PDT000733284.1	18	.	.	.	.	.	.	.	.	.	.	88.76;96.44	.	.	.	.	.	.	.	.	.	.	.	.	.	.	87.50	.	.	.	.	.	.	.	.	.	82.51;82.51	.	.	99.88;99.88	.	.	.	.	.	.	.	.	100.00;100.00
GCA_016489325.1_PDT000733282.1	12	.	.	.	.	.	.	.	.	.	.	.	.	.	.	.	.	.	.	.	.	.	.	.	.	.	.	.	.	.	.	.	.	.	.	.	.	.	.	99.88;99.88	.	.	.	.	.	.	.	.	100.00;100.00
GCA_016489345.1_PDT000733283.1	10	.	.	.	.	.	.	.	.	.	.	.	.	.	.	100.00;100.00	.	.	.	.	.	.	.	.	.	.	.	.	.	.	.	.	.	.	.	.	.	.	.	99.88;99.88	.	.	.	.	.	.	.	.	.
GCA_016489365.1_PDT000733274.1	9	.	.	.	.	.	.	.	.	.	.	89.33;97.00	.	.	100.00;100.00	.	.	.	.	.	.	.	.	.	.	.	.	.	.	.	.	.	.	.	.	.	.	.	.	99.88;99.88	.	.	.	.	.	.	.	.	.
GCA_016489385.1_PDT000733272.1	3	.	.	.	.	.	.	.	.	.	.	.	.	.	.	.	.	.	.	.	.	.	.	.	.	.	.	.	.	.	.	.	.	.	.	.	.	.	.	.	.	.	.	.	.	.	.	.	.
GCA_016489405.1_PDT000733276.1	14	.	.	.	.	.	.	.	.	.	.	.	.	.	.	.	.	.	.	.	.	.	.	.	.	.	.	.	97.92;97.92	.	.	100.00;100.00	.	.	.	.	.	.	.	.	.	.	.	.	.	.	.	.	.
GCA_016489425.1_PDT000733271.1	6	.	.	.	.	.	.	.	.	.	.	.	.	.	.	.	.	.	.	.	.	.	.	.	.	.	.	.	.	.	.	.	.	.	.	.	.	.	.	.	.	.	.	.	.	.	.	.	.
GCA_016489445.1_PDT000733267.1	9	.	.	.	.	.	.	.	.	.	.	.	.	.	.	.	.	.	.	.	.	.	.	.	.	.	.	.	.	.	.	100.00;100.00	.	.	.	.	.	.	.	.	.	.	.	.	.	.	.	.	.
GCA_016489465.1_PDT000733262.1	6	.	.	.	.	.	.	.	.	.	.	.	.	.	.	.	.	.	.	.	.	.	.	.	.	.	.	.	.	.	.	.	.	.	.	.	.	.	.	99.88;99.88	.	.	.	.	.	.	.	.	.
GCA_016489485.1_PDT000733255.1	6	.	.	.	.	.	.	.	.	.	.	.	.	.	.	.	.	.	.	.	.	.	.	.	.	.	.	.	.	.	.	.	.	.	.	.	.	.	.	.	.	.	.	.	.	.	.	.	.
GCA_016489505.1_PDT000733266.1	15	.	.	.	.	.	.	.	.	.	.	.	.	.	.	.	.	.	.	.	.	.	.	.	.	.	.	.	.	.	.	.	.	.	.	.	82.51;82.51	.	.	99.88;99.88	.	.	.	.	.	.	.	.	100.00;100.00
GCA_016489525.1_PDT000733256.1	14	.	.	.	.	.	.	.	.	.	.	.	.	.	.	.	.	.	.	.	.	.	.	.	.	.	.	.	97.92;97.92	.	.	100.00;100.00	.	.	.	.	.	.	.	.	.	.	.	.	.	.	.	.	.
GCA_016489545.1_PDT000733265.1	3	.	.	.	.	.	.	.	.	.	.	.	.	.	.	.	.	.	.	.	.	.	.	.	.	.	.	.	.	.	.	.	.	.	.	.	.	.	.	.	.	.	.	.	.	.	.	.	.
GCA_016489565.1_PDT000733244.1	9	.	.	.	.	.	.	.	.	.	.	.	.	.	.	.	.	.	.	.	.	.	.	.	.	.	.	.	.	.	.	100.00;100.00	.	.	.	.	.	.	.	.	.	.	.	.	.	.	.	.	.
GCA_016489585.1_PDT000733243.1	14	.	.	.	.	.	.	.	.	.	.	.	.	.	.	.	.	.	.	.	.	.	.	.	.	.	.	.	97.92;97.92	.	.	100.00;100.00	.	.	.	.	.	.	.	.	.	.	.	.	.	.	.	.	.
GCA_016489605.1_PDT000733242.1	8	.	.	.	.	.	.	.	.	.	.	.	.	.	.	.	.	.	.	.	.	.	.	.	.	.	.	.	.	.	.	.	.	.	.	.	.	.	.	99.88;99.88	.	.	.	.	.	.	.	.	.
GCA_016489625.1_PDT000733238.1	12	.	.	.	.	.	.	.	.	.	.	.	.	.	.	.	.	.	.	.	.	.	.	.	.	.	.	.	.	.	.	.	.	.	.	.	.	.	.	99.88;99.88	.	.	.	.	.	.	.	.	100.00;100.00
GCA_016489645.1_PDT000733236.1	14	.	.	.	.	.	.	.	.	.	.	.	.	.	.	.	.	.	.	.	.	.	.	.	.	.	.	.	97.92;97.92	.	.	100.00;100.00	.	.	.	.	.	.	.	.	.	.	.	.	.	.	.	.	.
GCA_016489665.1_PDT000733237.1	12	.	.	.	.	.	.	.	.	.	.	.	.	.	.	.	.	.	.	.	.	.	.	.	.	.	.	.	.	.	.	.	.	.	.	.	.	.	.	99.88;99.88	.	.	.	.	.	.	.	.	100.00;100.00
GCA_016489685.1_PDT000733231.1	3	.	.	.	.	.	.	.	.	.	.	.	.	.	.	.	.	.	.	.	.	.	.	.	.	.	.	.	.	.	.	.	.	.	.	.	.	.	.	.	.	.	.	.	.	.	.	.	.
GCA_016489705.1_PDT000733229.1	10	.	.	.	.	.	.	.	.	.	.	.	.	.	.	.	.	.	.	.	.	.	.	.	.	.	.	.	.	.	.	.	.	.	.	.	.	.	.	99.88;99.88	.	.	.	.	.	.	.	.	.
GCA_016489725.1_PDT000733228.1	3	.	.	.	.	.	.	.	.	.	.	.	.	.	.	.	.	.	.	.	.	.	.	.	.	.	.	.	.	.	.	.	.	.	.	.	.	.	.	.	.	.	.	.	.	.	.	.	.
GCA_016489745.1_PDT000733226.1	9	.	.	.	.	.	.	.	.	.	.	.	.	.	.	.	.	.	.	.	.	.	.	.	.	.	.	.	97.92;97.92	.	.	100.00;100.00	.	.	.	.	.	.	.	.	.	.	.	.	.	.	100.00;100.00	.	.
GCA_016489765.1_PDT000733227.1	6	.	.	.	.	.	.	.	.	.	.	.	.	.	.	.	.	.	.	.	.	.	.	.	.	.	.	.	.	.	.	.	.	.	.	.	.	.	.	.	.	.	.	.	.	.	.	.	.
GCA_016489785.1_PDT000733225.1	5	.	.	.	.	.	.	.	.	.	.	.	.	.	.	.	.	.	.	.	.	.	.	.	.	.	.	.	.	.	.	.	.	.	.	.	.	.	.	.	.	.	.	.	.	.	.	.	.
GCA_016489805.1_PDT000733222.1	8	.	.	.	.	.	.	.	.	.	.	.	.	.	.	.	.	.	.	.	.	.	.	.	.	.	.	.	.	.	.	.	.	.	.	.	.	.	.	99.88;99.88	.	.	.	.	.	.	.	.	.
GCA_016489825.1_PDT000733221.1	8	.	.	.	.	.	.	.	.	.	.	.	.	.	.	.	.	.	.	.	.	.	.	.	.	.	.	.	.	.	.	.	.	.	.	.	.	.	.	99.88;99.88	.	.	.	.	.	.	.	.	.
GCA_016489845.1_PDT000733215.1	16	.	.	.	.	.	.	.	.	.	.	.	.	.	.	.	.	.	.	.	.	.	.	.	.	.	.	.	.	.	.	.	.	.	.	.	82.51;82.51	.	.	99.88;99.88	.	.	.	.	.	.	.	.	100.00
GCA_016489855.1_PDT000733216.1	13	.	.	.	.	.	.	.	.	.	.	.	.	.	.	.	.	.	.	.	.	.	.	.	.	.	.	.	.	.	.	100.00;100.00	.	.	.	.	.	.	.	99.88;99.88	.	.	.	.	.	.	.	.	.
GCA_016489885.1_PDT000733218.1	7	.	.	.	.	.	.	.	.	.	.	.	.	.	.	.	.	.	.	.	.	.	.	.	.	.	.	.	.	.	.	.	.	.	.	.	.	.	.	99.88;99.88	.	.	.	.	.	.	.	.	.
GCA_016489905.1_PDT000733217.1	16	.	.	.	.	.	.	.	.	.	.	.	.	.	.	.	.	.	.	.	.	.	.	.	.	.	.	.	.	.	.	.	.	.	.	.	82.51;82.51	.	.	99.88;99.88	.	.	.	.	.	.	.	.	100.00
GCA_016489925.1_PDT000733214.1	6	.	.	.	.	.	.	.	.	.	.	.	.	.	.	.	.	.	.	.	.	.	.	.	.	.	.	.	.	.	.	.	.	.	.	.	.	.	.	99.88;99.88	.	.	.	.	.	.	.	.	.
GCA_016489945.1_PDT000733210.1	13	.	.	.	.	.	.	.	100.00;100.00	.	.	100.00;100.00	.	.	.	.	100.00;100.00	.	.	.	.	.	.	.	.	.	.	.	.	.	.	.	.	.	.	.	82.51;82.51	.	.	.	.	.	.	.	.	.	.	.	.
GCA_016489965.1_PDT000733211.1	13	.	.	.	.	.	.	.	.	.	.	100.00;100.00	.	.	.	.	.	.	.	.	.	.	.	.	.	.	.	.	.	.	.	.	.	.	.	.	82.51;82.51	.	.	99.88;99.88	.	.	.	.	.	.	.	.	100.00;100.00
GCA_016489985.1_PDT000733212.1	13	.	.	.	.	.	.	.	.	.	.	100.00;100.00	.	.	.	.	.	.	.	.	.	.	.	.	.	.	.	.	.	.	.	.	.	.	.	.	82.51;82.51	.	.	99.88;99.88	.	.	.	.	.	.	.	.	100.00;100.00
GCA_016490005.1_PDT000733208.1	14	.	.	.	.	.	.	.	.	.	.	89.33;96.63	.	.	100.00;100.00	.	.	.	.	.	.	.	.	.	.	.	.	.	.	.	100.00;100.00	.	.	.	.	.	.	.	.	99.88;99.88	.	.	.	.	.	.	.	.	.
GCA_016490025.1_PDT000733207.1	11	.	.	.	.	.	.	.	.	.	.	.	.	.	.	.	.	.	.	.	.	.	.	.	.	.	.	.	.	.	.	.	.	.	.	.	.	.	.	99.88;99.88	.	.	.	.	.	.	.	.	.
GCA_016490045.1_PDT000733206.1	13	.	.	.	.	.	.	.	.	.	.	89.33;96.63	.	.	100.00;100.00	.	.	.	.	.	.	.	.	.	.	.	.	.	.	.	100.00;100.00	.	.	.	.	.	.	.	.	99.88;99.88	.	.	.	.	.	.	.	.	.
GCA_016490065.1_PDT000733205.1	13	.	.	.	.	.	.	.	.	.	.	89.33;96.63	.	.	100.00;100.00	.	.	.	.	.	.	.	.	.	.	.	.	.	.	.	100.00;100.00	.	.	.	.	.	.	.	.	99.88;99.88	.	.	.	.	.	.	.	.	.
GCA_016490085.1_PDT000733204.1	13	.	.	.	.	.	.	.	.	.	.	.	.	.	100.00;100.00	.	.	.	.	.	.	.	.	.	.	.	.	.	.	.	100.00;100.00	.	.	.	.	.	.	.	.	99.88;99.88;99.75	.	.	.	.	.	.	.	.	.
GCA_016490105.1_PDT000733200.1	10	.	.	.	.	.	.	.	.	.	.	.	.	.	.	.	.	.	.	.	.	.	.	.	.	.	.	.	.	.	.	.	.	.	.	.	.	.	.	99.88;99.88	.	.	.	.	.	.	.	.	100.00;100.00
GCA_016490125.1_PDT000725303.1	13	.	.	.	.	.	.	.	.	.	.	.	.	.	.	.	.	.	.	.	.	.	.	.	.	.	.	.	.	.	.	.	.	.	.	.	.	.	.	92.54;99.88;99.88	.	.	.	.	.	.	.	.	100.00;100.00
GCA_016490135.1_PDT000725311.1	8	.	.	.	.	.	.	.	.	.	.	.	.	.	.	.	.	.	.	.	.	.	.	.	.	.	.	.	.	.	.	.	.	.	.	.	.	.	.	.	.	.	.	.	.	.	.	.	.
GCA_016490165.1_PDT000725304.1	13	.	.	.	.	.	.	.	.	.	.	.	.	.	.	.	.	.	.	.	.	.	.	.	.	.	.	.	.	.	.	.	.	.	.	.	.	.	.	93.78;99.88;99.88	.	.	.	.	.	.	.	.	100.00;100.00
GCA_016490185.1_PDT000725296.1	15	.	.	.	.	.	.	.	.	.	.	97.19;96.44	.	.	.	.	.	.	.	.	.	.	.	.	.	.	.	.	.	.	.	100.00;100.00	.	.	.	.	82.51;82.51	.	.	.	.	.	.	.	.	.	.	.	.
GCA_016490225.1_PDT000725300.1	15	.	.	.	.	.	.	.	.	.	.	.	.	.	.	.	.	.	.	.	.	.	.	.	.	.	.	.	.	.	.	.	.	.	.	.	82.51;82.51	.	.	99.88;99.88	.	.	.	.	.	.	.	.	100.00;100.00
GCA_016490245.1_PDT000725312.1	15	.	.	.	.	.	.	.	.	.	.	.	.	.	.	.	.	.	.	.	.	.	.	.	.	.	77.90;78.54	.	.	.	.	.	.	.	.	.	.	.	.	99.88;99.88	.	.	.	.	.	.	.	.	100.00;100.00
GCA_016490265.1_PDT000725309.1	7	.	.	.	.	.	.	.	.	.	.	100.00;100.00	.	.	.	.	.	.	.	.	.	.	.	.	.	.	.	.	.	.	.	.	.	.	.	.	82.51;82.51	.	.	.	.	.	.	.	.	.	.	.	.
GCA_016490285.1_PDT000725299.1	13	.	.	.	.	.	.	.	.	.	.	100.00;100.00	.	.	.	.	.	.	.	.	.	.	.	.	.	.	.	.	.	.	.	.	.	.	.	.	82.51;82.51	.	.	.	.	.	.	.	.	.	.	.	.
GCA_016490325.1_PDT000725298.1	6	.	.	.	.	.	.	.	.	.	.	.	.	.	.	100.00;100.00	.	.	.	.	.	.	.	.	.	.	.	.	.	.	.	.	.	.	.	.	.	.	.	.	.	.	.	.	.	.	.	.	.
GCA_016490345.1_PDT000725297.1	15	.	.	.	.	.	.	.	.	.	.	.	.	.	.	.	.	.	.	.	.	.	.	.	.	.	.	.	.	.	.	.	.	.	.	.	82.51;82.51	.	.	99.88;99.88	.	.	.	.	.	.	.	.	100.00;100.00
GCA_016490365.1_PDT000725290.1	13	.	.	.	.	.	.	.	.	.	.	.	.	.	.	.	.	.	.	.	.	.	.	.	.	.	.	.	.	.	.	.	.	.	.	.	.	.	.	93.78;99.88;99.88	.	.	.	.	.	.	.	.	100.00;100.00
GCA_016490375.1_PDT000725287.1	11	.	.	.	.	.	.	.	.	.	.	.	.	.	.	.	.	.	.	.	.	.	.	.	.	.	.	.	.	.	.	.	.	.	.	.	.	.	.	99.88;99.88	.	.	.	.	.	.	.	.	.
GCA_016490405.1_PDT000725294.1	11	.	.	.	.	.	.	.	.	.	.	100.00;100.00	.	.	.	.	.	.	.	.	.	.	.	.	.	.	.	.	.	.	.	.	.	.	.	.	82.51;82.51	.	.	.	.	.	.	.	.	.	.	.	.
GCA_016490425.1_PDT000725295.1	15	.	.	.	.	.	.	.	.	.	.	.	.	.	.	.	.	.	.	.	.	.	.	.	.	.	.	.	.	.	.	.	.	.	.	.	82.51;82.51	.	.	99.88;99.88	.	.	.	.	.	.	.	.	100.00;100.00
GCA_016490445.1_PDT000725293.1	15	.	.	.	.	.	.	.	.	.	.	.	.	.	.	.	.	.	.	.	.	.	.	.	.	.	.	.	.	.	.	.	.	.	.	.	82.51;82.51	.	.	99.88;99.88	.	.	.	.	.	.	.	.	100.00;100.00
GCA_016490465.1_PDT000725284.1	12	.	.	.	.	.	.	.	.	.	.	100.00;97.00	.	.	100.00;100.00	.	.	.	.	.	.	.	.	.	.	.	.	.	.	.	.	.	.	.	.	.	82.51;82.51	.	.	99.88;99.88	.	.	.	.	.	.	.	.	.
GCA_016490485.1_PDT000725286.1	11	.	.	.	.	.	.	.	.	.	.	.	.	.	.	.	.	.	.	.	.	.	.	.	.	.	.	.	.	.	.	.	.	.	.	.	.	.	.	99.88;99.88	.	.	.	.	.	.	.	.	.
GCA_016490505.1_PDT000725279.1	8	.	.	.	.	.	.	.	.	.	.	.	.	.	.	.	.	.	.	.	.	.	.	.	.	.	.	.	.	.	.	.	.	.	.	.	.	.	.	99.88;99.88	.	.	.	.	.	.	.	.	100.00;100.00
GCA_016490525.1_PDT000725273.1	13	.	.	.	.	.	.	.	.	.	.	.	.	.	.	.	.	.	.	.	.	.	.	.	.	.	.	.	.	.	.	.	.	.	.	.	.	.	.	98.63;99.88;99.88	.	.	.	.	.	.	.	.	100.00;100.00
GCA_016490545.1_PDT000725277.1	6	.	.	.	.	.	.	.	.	.	.	.	.	.	.	.	.	.	.	.	.	.	.	.	.	.	.	.	.	.	.	100.00;100.00	.	.	.	.	.	.	.	.	.	.	.	.	.	.	.	.	100.00;100.00
GCA_016490565.1_PDT000725276.1	13	.	.	.	.	.	.	.	.	.	.	.	.	.	.	.	.	.	.	.	.	.	.	.	.	.	.	.	.	.	.	.	.	.	.	.	.	.	.	93.78;99.88;99.88	.	.	.	.	.	.	.	.	100.00;100.00
GCA_016490585.1_PDT000725272.1	11	.	.	.	.	.	.	.	.	.	.	.	.	.	.	.	.	.	.	.	.	.	.	.	.	.	.	.	.	.	.	.	.	.	.	.	.	.	.	99.88;99.88	.	.	.	.	.	.	.	.	.
GCA_016490605.1_PDT000725281.1	13	.	.	.	.	.	.	.	.	.	.	.	.	.	.	.	.	.	.	.	.	.	.	.	.	.	.	.	.	.	.	.	.	.	.	.	82.51;82.51	.	.	99.88;99.88	.	.	.	.	.	.	.	.	.
GCA_016490625.1_PDT000725270.1	12	.	.	.	.	.	.	.	.	.	.	.	.	.	.	.	.	.	.	.	.	.	.	.	.	.	.	.	.	.	.	100.00;100.00	.	.	.	.	.	.	.	.	.	.	.	.	.	.	.	.	.
GCA_016490645.1_PDT000725267.1	15	.	.	.	.	.	.	.	.	.	.	.	.	.	.	.	.	.	.	.	.	.	.	.	.	.	.	.	.	.	.	.	.	.	.	.	82.51;82.51	.	.	99.88;99.88	.	.	.	.	.	.	.	.	100.00;100.00
GCA_016490665.1_PDT000725269.1	15	.	.	.	.	.	.	.	.	.	.	.	.	.	.	.	.	.	.	.	.	.	.	.	.	.	.	.	.	.	.	.	.	.	.	.	82.51;82.51	.	.	99.88;99.88	.	.	.	.	.	.	.	.	100.00;100.00
GCA_016490685.1_PDT000725265.1	15	.	.	.	.	.	.	.	.	.	.	.	.	.	.	.	.	.	.	.	.	.	.	.	.	.	.	.	.	.	.	.	.	.	.	.	82.51;82.51	.	.	99.88;99.88	.	.	.	.	.	.	.	.	100.00;100.00
GCA_016490695.1_PDT000725266.1	13	.	.	.	.	.	.	.	.	.	.	.	.	.	.	.	.	.	.	.	.	.	.	.	.	.	.	.	.	.	.	.	.	.	.	.	.	.	.	93.78;99.88;99.88	.	.	.	.	.	.	.	.	100.00;100.00
GCA_016490765.1_PDT000725229.1	13	.	.	.	.	.	.	.	.	.	.	.	.	.	.	.	.	.	.	.	.	.	.	.	.	.	.	.	.	.	.	.	.	.	.	.	.	.	.	92.54;99.88;99.88	.	.	.	.	.	.	.	.	100.00;100.00
GCA_016490785.1_PDT000725254.1	9	.	.	.	.	.	.	.	.	.	.	100.00;100.00	.	.	.	.	.	.	.	.	.	.	.	.	.	.	.	.	.	.	.	.	.	.	.	.	.	.	.	99.88;99.88	.	.	.	.	.	.	.	.	.
GCA_016490805.1_PDT000725227.1	15	.	.	.	.	.	.	.	.	.	.	.	.	.	.	.	.	.	.	.	.	.	.	.	.	.	.	.	.	.	.	.	.	.	.	.	82.51;82.51	.	.	99.88;99.88	.	.	.	.	.	.	.	.	100.00;100.00
GCA_016490825.1_PDT000725228.1	15	.	.	.	.	.	.	.	.	.	.	.	.	.	.	.	.	.	.	.	.	.	.	.	.	.	.	.	.	.	.	.	.	.	.	.	82.51;82.51	.	.	99.88;99.88	.	.	.	.	.	.	.	.	89.58;89.83
GCA_016490845.1_PDT000725262.1	15	.	.	.	.	.	.	.	.	.	.	.	.	.	.	.	.	.	.	.	.	.	.	.	.	.	.	.	97.92;97.92	.	.	100.00;100.00	.	.	.	.	.	.	.	.	.	.	.	.	.	.	.	.	.
GCA_016490865.1_PDT000725244.1	6	.	.	.	.	.	.	.	.	.	.	.	.	.	.	100.00;100.00	.	.	.	.	.	.	.	.	.	.	.	.	.	.	.	.	.	.	.	.	.	.	.	.	.	.	.	.	.	.	.	.	.
GCA_016490885.1_PDT000725241.1	12	.	.	.	.	.	.	.	.	.	.	.	.	.	.	.	.	.	.	.	.	.	.	.	.	.	.	.	.	.	.	100.00;100.00	.	.	.	.	.	.	.	.	.	.	.	.	.	.	.	.	.
GCA_016490915.1_PDT000725256.1	14	.	100.00;100.00	.	.	.	.	.	.	.	.	.	.	.	.	.	.	.	.	.	.	.	.	.	.	.	.	.	.	.	.	.	.	.	.	.	.	.	.	99.88;99.88	.	.	.	.	.	.	.	.	.
GCA_016490935.1_PDT000725247.1	10	.	.	.	.	.	.	.	.	.	.	89.33;97.00	.	.	100.00;100.00	.	.	.	.	.	.	.	.	.	.	.	.	.	.	.	.	.	.	.	.	.	.	.	.	99.88;99.88	.	.	.	.	.	.	.	.	.
GCA_016490955.1_PDT000725242.1	8	.	.	.	.	.	.	.	.	.	.	.	.	.	.	.	.	.	.	.	.	.	.	.	.	.	.	.	.	.	.	.	.	.	.	.	.	.	.	99.88;99.88	.	.	.	.	.	.	.	.	.
GCA_016490975.1_PDT000725223.1	13	.	.	.	.	.	.	.	.	.	.	.	.	.	.	.	.	.	.	.	.	.	.	.	.	.	.	.	.	.	.	.	.	.	.	.	.	.	.	93.78;99.88;99.88	.	.	.	.	.	.	.	.	100.00;100.00
GCA_016490995.1_PDT000725222.1	13	.	.	.	.	.	.	.	.	.	.	.	.	.	.	.	.	.	.	.	.	.	.	.	.	.	.	.	.	.	.	.	.	.	.	.	.	.	.	99.88;99.88	.	.	.	.	.	.	.	.	100.00;100.00
GCA_016491015.1_PDT000725218.1	13	.	.	.	.	.	.	.	.	.	.	.	.	.	.	.	.	.	.	.	.	.	.	.	.	.	.	.	.	.	.	.	.	.	.	.	.	.	.	93.78;99.88;99.88	.	.	.	.	.	.	.	.	100.00;100.00
GCA_016491035.1_PDT000725213.1	15	.	.	.	.	.	.	.	.	.	.	.	.	.	.	.	.	.	.	.	.	.	.	.	.	.	.	.	.	.	.	.	.	.	.	.	82.51;82.51	.	.	99.88;99.88	.	.	.	.	.	.	.	.	100.00;100.00
GCA_016491055.1_PDT000725209.1	13	.	.	.	.	.	.	.	.	.	.	.	.	.	.	.	.	96.86;96.86	.	.	.	.	.	.	.	.	.	.	.	.	.	.	.	.	.	.	82.51;82.51	.	.	99.88;99.88	.	.	.	.	.	.	.	.	100.00;100.00
GCA_016491075.1_PDT000725212.1	15	.	.	.	.	.	.	.	.	.	.	.	.	.	.	.	.	.	.	.	.	.	.	.	.	.	.	.	.	.	.	.	.	.	.	.	82.51;82.51	.	.	99.88;99.88	.	.	.	.	.	.	.	.	100.00;100.00
GCA_016491095.1_PDT000725208.1	13	.	.	.	.	.	.	.	.	.	.	.	.	.	.	.	.	96.86;96.86	.	.	.	.	.	.	.	.	.	.	.	.	.	.	.	.	.	.	82.51;82.51	.	.	99.88;99.88	.	.	.	.	.	.	.	.	100.00;100.00
GCA_016491125.1_PDT000725206.1	8	.	.	.	.	.	.	.	.	.	.	.	.	.	.	.	.	.	.	.	.	.	.	.	.	.	.	.	.	.	.	.	.	.	.	.	.	.	.	99.88;99.88	.	.	.	.	.	.	.	.	100.00;100.00
GCA_016491145.1_PDT000725205.1	7	.	.	.	.	.	.	.	.	.	.	.	.	.	.	.	.	.	.	.	.	.	.	.	.	.	.	.	97.92;97.92	.	.	100.00;100.00	.	.	.	.	.	.	.	.	.	.	.	.	.	.	.	.	.
GCA_016491165.1_PDT000725203.1	6	.	.	.	.	.	.	.	.	.	.	.	.	.	.	.	.	.	.	.	.	.	.	.	.	.	.	.	.	.	.	.	.	.	.	.	.	.	.	99.88;99.88	.	.	.	.	.	.	.	.	.
GCA_016491185.1_PDT000725202.1	17	.	.	.	.	.	.	.	.	.	.	.	.	.	.	.	.	.	.	.	.	.	.	.	.	.	.	.	.	.	.	.	.	.	.	.	82.51;82.51	.	.	99.88;99.88	.	.	.	.	.	.	.	.	100.00;100.00
GCA_016491205.1_PDT000725201.1	15	.	.	.	.	.	.	.	.	.	.	.	.	.	.	.	.	.	.	.	.	.	.	.	.	.	.	.	.	.	.	.	.	.	.	.	82.51;82.51	.	.	99.88;99.88	.	.	.	.	.	.	.	.	100.00;100.00
GCA_016491225.1_PDT000725200.1	15	.	.	.	.	.	.	.	.	.	.	.	.	.	.	.	.	.	.	.	.	.	.	.	.	.	.	.	.	.	.	.	.	.	.	.	82.51;82.51	.	.	99.88;99.88	.	.	.	.	.	.	.	.	100.00;100.00
GCA_016491245.1_PDT000725204.1	6	.	.	.	.	.	.	.	.	.	.	.	.	.	.	.	.	.	.	.	.	.	.	.	.	.	.	.	.	.	.	.	.	.	.	.	.	.	.	99.88;99.88	.	.	.	.	.	.	.	.	.
GCA_016491265.1_PDT000725065.1	16	.	.	.	.	.	.	.	.	.	.	.	.	.	.	.	.	.	.	.	.	.	.	.	.	.	.	.	.	.	.	.	.	.	.	.	82.51;82.51	.	.	99.88;99.88	.	.	.	.	.	.	.	.	100.00;100.00
GCA_016491285.1_PDT000725063.1	14	.	.	.	.	.	.	.	.	.	.	100.00;96.44	.	.	.	.	.	.	.	.	.	.	.	.	.	.	87.50	.	.	.	.	.	.	.	.	.	82.51;82.51	.	.	.	.	.	.	.	.	.	.	.	.
GCA_016491295.1_PDT000725062.1	14	.	.	.	.	.	.	.	.	.	.	100.00;96.44	.	.	.	.	.	.	.	.	.	.	.	.	.	.	87.50	.	.	.	.	.	.	.	.	.	82.51;82.51	.	.	.	.	.	.	.	.	.	.	.	.
GCA_016491325.1_PDT000725198.1	11	.	.	.	.	.	.	.	.	.	.	.	.	.	.	.	.	.	.	.	.	.	.	.	.	.	.	.	.	.	.	.	.	.	.	.	.	.	.	99.88;99.88	.	.	.	.	.	.	.	.	.
GCA_016491345.1_PDT000725061.1	14	.	.	.	.	.	.	.	.	.	.	88.76;96.44	.	.	.	.	.	.	.	.	.	.	.	.	.	.	98.99	.	.	.	.	.	.	.	.	.	82.51;82.51	.	.	.	.	.	.	.	.	.	.	.	.
GCA_016491365.1_PDT000725199.1	15	.	.	.	.	.	.	.	.	.	.	.	.	.	.	.	.	.	.	.	.	.	.	.	.	.	.	.	.	.	.	.	.	.	.	.	82.51;82.51	.	.	99.88;99.88	.	.	.	.	.	.	.	.	100.00;100.00
GCA_016491385.1_PDT000725056.1	16	.	.	.	.	.	.	.	.	.	.	.	.	.	.	.	.	.	.	.	.	.	.	.	.	.	.	.	.	.	.	.	.	.	.	.	.	.	.	99.88;99.88	.	.	.	.	.	.	.	.	100.00;100.00
GCA_016491405.1_PDT000725059.1	18	.	.	.	.	.	.	.	.	.	.	100.00;100.00	.	.	.	.	.	.	.	.	.	.	.	.	.	.	.	.	.	.	.	.	.	.	.	.	82.51;82.51	.	.	99.88;99.88	.	.	.	.	.	.	.	.	100.00;100.00
GCA_016491425.1_PDT000725057.1	15	.	.	.	.	.	.	.	.	.	.	.	.	.	.	.	.	.	.	.	.	.	.	.	.	.	.	.	.	.	.	.	.	.	.	.	.	.	.	99.88;99.88	.	.	.	.	.	.	.	.	100.00;100.00
GCA_016491445.1_PDT000725060.1	14	.	.	.	.	.	.	.	.	.	.	100.00;96.44	.	.	.	.	.	.	.	.	.	.	.	.	.	.	98.99	.	.	.	.	.	.	.	.	.	82.51;82.51	.	.	.	.	.	.	.	.	.	.	.	.
GCA_016491465.1_PDT000725055.1	16	.	.	.	.	.	.	.	.	.	.	.	.	.	.	.	.	.	.	.	.	.	.	.	.	.	.	.	.	.	.	.	.	.	.	.	.	.	.	99.88;99.88	.	.	.	.	.	.	.	.	100.00;100.00
GCA_016491485.1_PDT000725054.1	15	.	.	.	.	.	.	.	.	.	.	.	.	.	.	.	.	.	.	.	.	.	.	.	.	.	.	.	.	.	.	.	.	.	.	.	.	.	.	99.88;99.88	.	.	.	.	.	.	.	.	100.00;100.00
GCA_016491505.1_PDT000725051.1	15	.	.	.	.	.	.	.	.	.	.	.	.	.	.	.	.	.	.	.	.	.	.	.	.	.	.	.	.	.	.	.	.	.	.	.	.	.	.	99.88;99.88	.	.	.	.	.	.	.	.	100.00;100.00
GCA_016491525.1_PDT000725050.1	11	.	.	.	.	.	.	.	.	.	.	100.00;100.00	.	.	.	.	.	.	.	.	.	.	.	.	.	.	.	.	.	.	.	.	.	.	.	.	82.51;82.51	.	.	.	.	.	.	.	.	.	.	.	.
GCA_016491545.1_PDT000725053.1	17	.	100.00;100.00	.	.	.	.	.	.	.	100.00;100.00	.	.	.	.	.	.	.	.	.	.	.	.	.	.	.	.	.	.	.	.	.	.	.	.	.	.	.	.	99.88;99.88	.	.	.	.	.	.	.	.	.
GCA_016491565.1_PDT000725052.1	16	.	.	.	.	.	.	.	.	.	.	.	.	.	.	.	.	.	.	.	.	.	.	.	.	.	.	.	.	.	.	.	.	.	.	.	.	.	.	99.88;99.88	.	.	.	.	.	.	.	.	100.00;100.00
GCA_016491585.1_PDT000725049.1	18	.	.	.	.	.	.	.	.	.	.	100.00;96.44	.	.	.	.	.	.	.	.	.	.	.	.	.	.	87.50	.	.	.	.	.	.	.	.	.	82.51;82.51	.	.	99.88;99.88	.	.	.	.	.	.	.	.	100.00;100.00
GCA_016496265.1_PDT000725046.1	13	.	.	.	.	.	.	.	.	.	.	.	.	.	.	.	.	.	.	.	.	.	.	.	.	.	.	.	.	.	.	.	.	.	.	.	.	.	.	99.88;99.88	.	.	.	.	.	.	.	.	.
GCA_016496365.1_PDT000725045.1	16	.	.	.	.	.	.	.	.	.	.	.	.	.	.	.	.	.	.	.	.	.	.	.	.	.	.	.	.	.	.	.	.	.	.	.	82.51;82.51	.	.	99.88;99.88	.	.	.	.	.	.	.	.	100.00;100.00
GCA_016496385.1_PDT000725047.1	15	.	.	.	.	.	.	.	.	.	.	100.00;96.44	.	.	.	.	.	.	.	.	.	.	.	.	.	.	87.50	.	.	.	.	.	.	.	.	.	82.51;82.51	.	.	.	.	.	.	.	.	.	.	.	100.00;100.00
GCA_016496405.1_PDT000725048.1	18	.	.	.	.	.	.	.	.	.	.	100.00;96.44	.	.	.	.	.	.	.	.	.	.	.	.	.	.	87.50	.	.	.	.	.	.	.	.	.	82.51;82.51	.	.	99.88;99.88	.	.	.	.	.	.	.	.	100.00;100.00
GCA_016496425.1_PDT000725044.1	9	.	.	.	.	.	.	.	.	.	.	100.00;100.00	.	.	.	.	.	.	.	.	.	.	.	.	.	.	.	.	.	.	.	.	.	.	.	.	82.51;82.51	.	.	.	.	.	.	.	.	.	.	.	.
GCA_016496445.1_PDT000725035.1	15	.	.	.	.	.	.	.	.	.	.	.	.	.	.	.	.	.	.	.	.	.	.	.	.	.	.	.	.	.	.	.	100.00;100.00	.	.	.	.	.	.	99.88;99.88	.	.	.	.	.	.	.	.	100.00;100.00
GCA_016496465.1_PDT000725037.1	7	.	.	.	.	.	.	.	.	.	.	.	.	.	.	.	.	.	.	.	.	.	.	.	.	.	.	.	.	.	.	.	100.00;100.00	.	.	.	.	.	.	.	.	.	.	.	.	.	.	.	.
GCA_016496495.1_PDT000725034.1	3	.	.	.	.	.	.	.	.	.	.	.	.	.	.	.	.	.	.	.	.	.	.	.	.	.	.	.	.	.	.	.	.	.	.	.	.	.	.	.	.	.	.	.	.	.	.	.	.
GCA_016496525.1_PDT000725036.1	13	.	.	.	.	.	.	.	.	.	.	100.00;100.00	.	.	.	.	.	.	.	.	.	.	.	.	.	.	.	.	.	.	.	.	.	.	.	.	82.51;82.51	.	.	99.88;99.88	.	.	.	.	.	.	.	.	100.00;100.00
GCA_016496545.1_PDT000725042.1	9	.	.	.	.	.	.	.	.	.	.	100.00;100.00	.	.	.	.	.	.	.	.	.	.	.	.	.	.	.	.	.	.	.	.	.	.	.	.	82.51;82.51	.	.	.	.	.	.	.	.	.	.	.	.
GCA_016496565.1_PDT000725043.1	9	.	.	.	.	.	.	.	.	.	.	100.00;100.00	.	.	.	.	.	.	.	.	.	.	.	.	.	.	.	.	.	.	.	.	.	.	.	.	82.51;82.51	.	.	.	.	.	.	.	.	.	.	.	.
GCA_016496585.1_PDT000725041.1	9	.	.	.	.	.	.	.	.	.	.	100.00;100.00	.	.	.	.	.	.	.	.	.	.	.	.	.	.	.	.	.	.	.	.	.	.	.	.	82.51;82.51	.	.	.	.	.	.	.	.	.	.	.	.
GCA_016496605.1_PDT000725039.1	9	.	.	.	.	.	.	.	.	.	.	100.00;100.00	.	.	.	.	.	.	.	.	.	.	.	.	.	.	.	.	.	.	.	.	.	.	.	.	82.51;82.51	.	.	.	.	.	.	.	.	.	.	.	.
GCA_016496625.1_PDT000725040.1	9	.	.	.	.	.	.	.	.	.	.	100.00;100.00	.	.	.	.	.	.	.	.	.	.	.	.	.	.	.	.	.	.	.	.	.	.	.	.	82.51;82.51	.	.	.	.	.	.	.	.	.	.	.	.
GCA_016496645.1_PDT000725033.1	3	.	.	.	.	.	.	.	.	.	.	.	.	.	.	.	.	.	.	.	.	.	.	.	.	.	.	.	.	.	.	.	.	.	.	.	.	.	.	.	.	.	.	.	.	.	.	.	.
GCA_016496665.1_PDT000725038.1	11	.	.	.	.	.	.	.	.	.	.	100.00;96.44	.	.	.	.	.	.	.	.	.	.	.	.	.	.	87.50	.	.	.	.	.	.	.	.	.	82.51;82.51	.	.	.	.	.	.	.	.	.	.	.	.
GCA_016496685.1_PDT000725032.1	3	.	.	.	.	.	.	.	.	.	.	.	.	.	.	.	.	.	.	.	.	.	.	.	.	.	.	.	.	.	.	.	.	.	.	.	.	.	.	.	.	.	.	.	.	.	.	.	.
GCA_016496705.1_PDT000725031.1	3	.	.	.	.	.	.	.	.	.	.	.	.	.	.	.	.	.	.	.	.	.	.	.	.	.	.	.	.	.	.	.	.	.	.	.	.	.	.	.	.	.	.	.	.	.	.	.	.
GCA_016496715.1_PDT000725029.1	13	.	.	.	.	.	.	.	.	.	.	100.00;100.00	.	.	.	.	.	.	.	.	.	.	.	.	.	.	.	.	.	.	.	.	.	.	.	.	82.51;82.51	.	.	99.88;99.88	.	.	.	.	.	.	.	.	100.00;100.00
GCA_016496745.1_PDT000725028.1	13	.	.	.	.	.	.	.	.	.	.	100.00;100.00	.	.	.	.	.	.	.	.	.	.	.	.	.	.	.	.	.	.	.	.	.	.	.	.	82.51;82.51	.	.	99.88;99.88	.	.	.	.	.	.	.	.	100.00;100.00
GCA_016496765.1_PDT000725030.1	13	.	.	.	.	.	.	.	.	.	.	100.00;100.00	.	.	.	.	.	.	.	.	.	.	.	.	.	.	.	.	.	.	.	.	.	.	.	.	82.51;82.51	.	.	99.88;99.88	.	.	.	.	.	.	.	.	100.00;100.00
GCA_016496785.1_PDT000725027.1	12	.	.	.	.	.	.	.	.	.	.	100.00;100.00	.	.	.	.	.	.	.	.	.	.	.	.	.	.	.	.	.	.	.	.	.	.	.	.	82.51;82.51	.	.	99.88;99.88	.	.	.	.	.	.	.	.	100.00;100.00
GCA_016496805.1_PDT000725026.1	12	.	.	.	.	.	.	.	.	.	.	100.00;100.00	.	.	.	.	.	.	.	.	.	.	.	.	.	.	.	.	.	.	.	.	.	.	.	.	82.51;82.51	.	.	99.88;99.88	.	.	.	.	.	.	.	.	100.00;100.00
GCA_016496825.1_PDT000725024.1	12	.	.	.	.	.	.	.	.	.	.	100.00;100.00	.	.	.	.	.	.	.	.	.	.	.	.	.	.	.	.	.	.	.	.	.	.	.	.	82.51;82.51	.	.	99.88;99.88	.	.	.	.	.	.	.	.	100.00;100.00
GCA_016496845.1_PDT000725025.1	12	.	.	.	.	.	.	.	.	.	.	100.00;100.00	.	.	.	.	.	.	.	.	.	.	.	.	.	.	.	.	.	.	.	.	.	.	.	.	82.51;82.51	.	.	99.88;99.88	.	.	.	.	.	.	.	.	100.00;100.00
GCA_016496865.1_PDT000663729.1	15	.	.	.	.	.	.	.	.	.	.	.	.	.	.	.	.	.	.	.	.	.	.	.	.	.	.	.	.	.	.	.	.	.	.	.	82.51;82.51	.	.	99.88;99.88	.	.	.	.	.	.	.	.	100.00;100.00
GCA_016496885.1_PDT000663730.1	3	.	.	.	.	.	.	.	.	.	.	.	.	.	.	.	.	.	.	.	.	.	.	.	.	.	.	.	.	.	.	.	.	.	.	.	.	.	.	.	.	.	.	.	.	.	.	.	.
GCA_016496905.1_PDT000663728.1	10	.	.	.	.	.	.	.	.	.	.	89.33;89.51	.	.	100.00;100.00	.	.	.	.	.	.	.	.	.	.	.	.	.	.	.	.	.	.	.	.	.	.	.	.	99.88;99.88	.	.	.	.	.	.	.	.	.
GCA_016496925.1_PDT000662398.1	13	.	.	.	.	.	.	.	.	.	.	.	.	.	.	.	.	.	.	.	.	.	.	.	.	.	.	.	.	.	.	.	.	.	.	.	.	.	.	99.88;99.88	.	.	.	.	.	.	.	.	100.00;100.00
GCA_016496945.1_PDT000663700.1	17	.	100.00;100.00;99.82	.	.	.	.	.	.	.	.	.	.	.	.	100.00;100.00;100.00	.	.	.	.	.	.	.	.	.	.	.	.	.	.	.	.	.	.	.	.	.	.	.	99.88;99.88;99.88;99.88	.	.	.	.	.	.	.	.	.
GCA_016496965.1_PDT000663721.1	16	.	.	.	.	.	.	.	.	.	.	100.00;100.00	.	.	.	.	.	.	.	.	.	.	.	.	.	.	.	.	.	.	.	.	.	.	.	.	82.51;82.51;72.12	.	.	.	.	.	.	.	.	.	.	.	100.00;100.00
GCA_016496985.1_PDT000663723.1	10	.	.	.	.	.	.	.	.	.	.	.	.	.	.	.	.	.	.	.	.	.	.	.	.	.	.	.	.	.	.	.	.	.	.	.	.	.	.	99.88;99.88	.	.	.	.	.	.	.	.	100.00;100.00
GCA_016497005.1_PDT000663687.1	17	.	.	.	.	.	.	.	.	.	.	.	.	.	.	.	.	.	.	.	.	.	.	.	.	.	.	.	.	.	.	.	.	.	.	.	82.51;82.51;82.51	.	.	99.88;99.88	.	.	.	.	.	.	.	.	100.00;100.00
GCA_016497025.1_PDT000663715.1	18	.	100.00;100.00	.	.	.	100.00;100.00	.	.	.	.	.	.	.	.	100.00;100.00	.	.	.	.	.	.	.	.	.	.	.	.	.	.	.	.	.	.	.	.	.	.	.	99.88;99.88	.	.	.	.	.	.	.	.	.
GCA_016497045.1_PDT000663714.1	14	.	.	.	.	.	.	.	.	.	.	.	.	.	.	.	.	.	.	.	.	.	.	.	.	.	.	.	.	.	.	.	.	.	.	.	.	.	.	99.88;99.88;99.75	.	.	.	.	.	.	.	.	100.00;100.00
GCA_016497065.1_PDT000663716.1	18	.	100.00;91.53	.	.	.	100.00;100.00;100.00	.	.	.	.	.	.	.	.	100.00;100.00	.	.	.	.	.	.	.	.	.	.	.	.	.	.	.	.	.	.	.	.	.	.	.	99.88;99.88;99.88	.	.	.	.	.	.	.	.	.
GCA_016497085.1_PDT000663724.1	11	.	.	.	.	.	.	.	.	.	.	100.00;100.00	.	.	.	.	.	.	.	.	.	.	.	.	.	.	.	.	.	.	.	.	.	.	.	.	82.51;82.51	.	.	.	.	.	.	.	.	.	.	.	100.00;100.00
GCA_016497105.1_PDT000663708.1	12	.	.	.	.	.	.	.	.	.	.	.	.	.	.	.	.	.	.	.	.	.	.	.	.	.	.	.	.	.	.	.	.	.	.	.	.	.	.	99.88;99.88;99.88	.	.	.	.	.	.	.	.	100.00;100.00;100.00
GCA_016497125.1_PDT000663707.1	9	.	.	.	.	.	.	.	.	.	.	.	.	.	.	.	.	.	.	.	.	.	.	.	.	.	.	.	.	.	.	.	100.00;100.00	.	.	.	.	.	.	.	100.00;100.00;100.00;100.00;100.00	.	.	.	.	.	.	.	.
GCA_016497145.1_PDT000662396.1	13	.	.	.	.	.	.	.	.	.	.	.	.	.	.	.	.	.	.	.	.	.	.	.	.	.	.	.	.	.	.	.	.	.	.	.	.	.	.	99.88;99.88	.	.	.	.	.	.	.	.	100.00;100.00
GCA_016497165.1_PDT000662395.1	11	.	.	.	.	.	.	.	.	.	.	.	.	.	.	.	.	.	.	.	.	.	.	.	.	.	.	.	.	.	.	.	.	.	.	.	82.51;82.51	.	.	.	.	.	.	.	.	.	.	.	.
GCA_016497185.1_PDT000663701.1	19	.	.	.	.	.	.	.	.	.	.	100.00;88.95	.	.	.	.	.	.	.	.	.	.	.	.	.	.	87.50	.	.	.	.	.	.	.	.	.	82.51;82.51	.	.	99.88;99.88	.	.	.	.	.	.	.	.	100.00;100.00;100.00;100.00
GCA_016497205.1_PDT000662397.1	11	.	.	.	.	.	.	.	.	.	.	.	.	.	.	.	.	.	.	.	.	.	.	.	.	.	.	.	.	.	.	.	.	.	.	.	82.51;82.51	.	.	.	.	.	.	.	.	.	.	.	.
GCA_016497225.1_PDT000662394.1	11	.	.	.	.	.	.	.	.	.	.	.	.	.	.	.	.	.	.	.	.	.	.	.	.	.	.	.	.	.	.	.	.	.	.	.	82.51;82.51	.	.	.	.	.	.	.	.	.	.	.	.
GCA_016497245.1_PDT000662393.1	13	.	.	.	.	.	.	.	.	.	.	.	.	.	.	.	.	.	.	.	.	.	.	.	.	.	.	.	.	.	.	.	.	.	.	.	.	.	.	99.88;99.88	.	.	.	.	.	.	.	.	100.00;100.00
GCA_016497265.1_PDT000662392.1	13	.	.	.	.	.	.	.	.	.	.	.	.	.	.	.	.	.	.	.	.	.	.	.	.	.	.	.	.	.	.	.	.	.	.	.	.	.	.	99.88;99.88	.	.	.	.	.	.	.	.	100.00;100.00
GCA_016497285.1_PDT000662389.1	11	.	.	.	.	.	.	.	.	.	.	.	.	.	.	.	.	.	.	.	.	.	.	.	.	.	.	.	.	.	.	.	.	.	.	.	82.51;82.51	.	.	.	.	.	.	.	.	.	.	.	.
GCA_016497305.1_PDT000662391.1	11	.	.	.	.	.	.	.	.	.	.	.	.	.	.	.	.	.	.	.	.	.	.	.	.	.	.	.	.	.	.	.	.	.	.	.	82.51;82.51	.	.	.	.	.	.	.	.	.	.	.	.
GCA_016497325.1_PDT000662386.1	11	.	.	.	.	.	.	.	.	.	.	.	.	.	.	.	.	.	.	.	.	.	.	.	.	.	.	.	.	.	.	.	.	.	.	.	.	.	.	99.88;99.88	.	.	.	.	.	.	.	.	.
GCA_016497345.1_PDT000662390.1	11	.	.	.	.	.	.	.	.	.	.	.	.	.	.	.	.	.	.	.	.	.	.	.	.	.	.	.	.	.	.	.	.	.	.	.	82.51;82.51	.	.	.	.	.	.	.	.	.	.	.	.
GCA_016497365.1_PDT000662388.1	13	.	.	.	.	.	.	.	.	.	.	.	.	.	.	.	.	.	.	.	.	.	.	.	.	.	.	.	.	.	.	.	.	.	.	.	.	.	.	99.88;99.88	.	.	.	.	.	.	.	.	100.00;100.00
GCA_016497385.1_PDT000662385.1	11	.	.	.	.	.	.	.	.	.	.	.	.	.	.	.	.	.	.	.	.	.	.	.	.	.	.	.	.	.	.	.	.	.	.	.	.	.	.	99.88;99.88	.	.	.	.	.	.	.	.	.
GCA_016497405.1_PDT000662378.1	12	.	.	.	.	.	.	.	.	.	.	.	.	.	.	.	.	.	.	.	.	.	.	.	.	.	.	.	.	.	.	.	.	.	.	.	.	.	.	99.88;99.88	.	.	.	.	.	.	.	.	.
GCA_016497425.1_PDT000662375.1	12	.	.	.	.	.	.	.	.	.	.	.	.	.	.	.	.	.	.	.	.	.	.	.	.	.	.	.	.	.	.	.	.	.	.	.	.	.	.	99.88;99.88	.	.	.	.	.	.	.	.	.
GCA_016497445.1_PDT000662383.1	12	.	.	.	.	.	.	.	.	.	.	.	.	.	.	.	.	.	.	.	.	.	.	.	.	.	.	.	.	.	.	.	.	.	.	.	.	.	.	99.88;99.88	.	.	.	.	.	.	.	.	.
GCA_016497465.1_PDT000662381.1	12	.	.	.	.	.	.	.	.	.	.	.	.	.	.	.	.	.	.	.	.	.	.	.	.	.	.	.	.	.	.	.	.	.	.	.	.	.	.	99.88;99.88	.	.	.	.	.	.	.	.	.
GCA_016497485.1_PDT000662382.1	12	.	.	.	.	.	.	.	.	.	.	.	.	.	.	.	.	.	.	.	.	.	.	.	.	.	.	.	.	.	.	.	.	.	.	.	.	.	.	99.88;99.88	.	.	.	.	.	.	.	.	.
GCA_016497505.1_PDT000662380.1	12	.	.	.	.	.	.	.	.	.	.	.	.	.	.	.	.	.	.	.	.	.	.	.	.	.	.	.	.	.	.	.	.	.	.	.	.	.	.	99.88;99.88	.	.	.	.	.	.	.	.	.
GCA_016497525.1_PDT000662379.1	12	.	.	.	.	.	.	.	.	.	.	.	.	.	.	.	.	.	.	.	.	.	.	.	.	.	.	.	.	.	.	.	.	.	.	.	.	.	.	99.88;99.88	.	.	.	.	.	.	.	.	.
GCA_016497545.1_PDT000662377.1	9	.	.	.	.	.	.	.	.	.	.	.	.	.	.	.	.	.	.	.	.	.	.	.	.	.	.	.	97.92;97.92	.	.	100.00;100.00	.	.	.	.	.	.	.	.	.	.	.	.	.	.	.	.	.
GCA_016497565.1_PDT000662374.1	12	.	.	.	.	.	.	.	.	.	.	.	.	.	.	.	.	.	.	.	.	.	.	.	.	.	.	.	.	.	.	.	.	.	.	.	.	.	.	99.88;99.88	.	.	.	.	.	.	.	.	.
GCA_016497585.1_PDT000662376.1	9	.	.	.	.	.	.	.	.	.	.	.	.	.	.	.	.	.	.	.	.	.	.	.	.	.	.	.	97.92;97.92	.	.	100.00;100.00	.	.	.	.	.	.	.	.	.	.	.	.	.	.	.	.	.
GCA_016497605.1_PDT000662373.1	12	.	.	.	.	.	.	.	.	.	.	.	.	.	.	.	.	.	.	.	.	.	.	.	.	.	.	.	.	.	.	.	.	.	.	.	.	.	.	99.88;99.88	.	.	.	.	.	.	.	.	.
GCA_016497625.1_PDT000662372.1	12	.	.	.	.	.	.	.	.	.	.	.	.	.	.	.	.	.	.	.	.	.	.	.	.	.	.	.	.	.	.	.	.	.	.	.	.	.	.	99.88;99.88	.	.	.	.	.	.	.	.	.
GCA_016497645.1_PDT000662371.1	12	.	.	.	.	.	.	.	.	.	.	.	.	.	.	.	.	.	.	.	.	.	.	.	.	.	.	.	.	.	.	.	.	.	.	.	.	.	.	99.88;99.88	.	.	.	.	.	.	.	.	.
GCA_016497665.1_PDT000662369.1	12	.	.	.	.	.	.	.	.	.	.	.	.	.	.	.	.	.	.	.	.	.	.	.	.	.	.	.	.	.	.	.	.	.	.	.	.	.	.	99.88;99.88	.	.	.	.	.	.	.	.	.
GCA_016497675.1_PDT000662370.1	12	.	.	.	.	.	.	.	.	.	.	.	.	.	.	.	.	.	.	.	.	.	.	.	.	.	.	.	.	.	.	.	.	.	.	.	.	.	.	99.88;99.88	.	.	.	.	.	.	.	.	.
GCA_016497705.1_PDT000662360.1	14	.	.	.	.	.	.	.	.	.	.	.	.	.	.	.	.	.	.	.	.	.	.	.	.	.	.	.	.	.	.	.	.	.	.	.	82.51	.	.	99.88;99.88	.	.	.	.	.	.	.	.	100.00;100.00
GCA_016497725.1_PDT000662359.1	14	.	.	.	.	.	.	.	.	.	.	.	.	.	.	.	.	.	.	.	.	.	.	.	.	.	.	.	.	.	.	.	.	.	.	.	82.51;82.51	.	.	99.88;99.88	.	.	.	.	.	.	.	.	100.00;100.00
GCA_016497745.1_PDT000662356.1	14	.	.	.	.	.	.	.	.	.	.	.	.	.	.	.	.	.	.	.	.	.	.	.	.	.	.	.	.	.	.	.	.	.	.	.	82.51;82.51	.	.	99.88;99.88	.	.	.	.	.	.	.	.	100.00;100.00
GCA_016497765.1_PDT000662357.1	16	.	.	.	.	.	.	.	.	.	.	.	.	.	.	.	.	.	.	.	.	.	.	.	.	.	.	.	.	.	.	.	.	.	.	.	82.51;82.51	.	.	99.88;99.88	.	.	.	.	.	.	.	.	100.00;100.00
GCA_016497785.1_PDT000662355.1	15	.	.	.	.	.	.	.	.	.	.	.	.	.	.	.	.	.	.	.	.	.	.	.	.	.	.	.	.	.	.	.	.	.	.	.	82.51;82.51	.	.	99.88;99.88	.	.	.	.	.	.	.	.	100.00;100.00
GCA_016497805.1_PDT000662358.1	14	.	.	.	.	.	.	.	.	.	.	.	.	.	.	.	.	.	.	.	.	.	.	.	.	.	.	.	.	.	.	.	.	.	.	.	82.51;82.51	.	.	99.88;99.88	.	.	.	.	.	.	.	.	100.00;100.00
GCA_016497825.1_PDT000662354.1	12	.	.	.	.	.	.	.	.	.	.	.	.	.	.	.	.	.	.	.	.	.	.	.	.	.	.	.	.	.	.	.	.	.	.	.	82.51;82.51	.	.	99.88;99.88	.	.	.	.	.	.	.	.	.
GCA_016497845.1_PDT000662352.1	13	.	.	.	.	.	.	.	.	.	.	.	.	.	.	.	.	.	.	.	.	.	.	.	.	.	.	.	.	.	.	.	.	.	.	.	82.51;82.51	.	.	99.88;99.88	.	.	.	.	.	.	.	.	100.00;100.00
GCA_016497865.1_PDT000662353.1	14	.	.	.	.	.	.	.	.	.	.	.	.	.	.	.	.	.	.	.	.	.	.	.	.	.	.	.	.	.	.	.	.	.	.	.	82.51;82.51	.	.	99.88;99.88	.	.	.	.	.	.	.	.	100.00;100.00
GCA_016497885.1_PDT000662351.1	13	.	.	.	.	.	.	.	.	.	.	.	.	.	.	.	.	.	.	.	.	.	.	.	.	.	.	.	.	.	.	.	.	.	.	.	82.51;82.51	.	.	99.88;99.88	.	.	.	.	.	.	.	.	100.00;100.00
GCA_016497905.1_PDT000662317.1	4	.	.	.	.	.	.	.	.	.	.	.	.	.	.	.	.	.	.	.	.	.	.	.	.	.	.	.	.	.	.	.	.	.	.	.	.	.	.	.	.	.	.	.	.	.	.	.	.
GCA_016497925.1_PDT000662326.1	3	.	.	.	.	.	.	.	.	.	.	.	.	.	.	.	.	.	.	.	.	.	.	.	.	.	.	.	.	.	.	.	.	.	.	.	.	.	.	.	.	.	.	.	.	.	.	.	.
GCA_016497945.1_PDT000662318.1	4	.	.	.	.	.	.	.	.	.	.	.	.	.	.	.	.	.	.	.	.	.	.	.	.	.	.	.	.	.	.	.	.	.	.	.	.	.	.	.	.	.	.	.	.	.	.	.	.
GCA_016497965.1_PDT000662348.1	10	.	.	.	.	.	.	.	.	.	.	100.00;100.00;100.00	.	.	.	.	.	.	.	.	.	.	.	.	.	.	.	.	.	.	.	.	.	.	.	.	82.51;82.51;82.51	.	.	.	.	.	.	.	.	.	.	.	.
GCA_016497985.1_PDT000662347.1	15	.	.	.	.	.	.	.	.	.	.	.	.	.	100.00;100.00	.	.	.	.	.	.	.	.	.	.	.	.	.	.	.	100.00;100.00	.	.	.	.	.	.	.	.	99.88;99.88	.	.	.	.	.	.	.	.	.
GCA_016498005.1_PDT000662309.1	5	.	.	.	.	.	.	.	.	.	.	.	.	.	.	.	.	.	.	.	.	.	95.27;95.27	.	.	.	.	.	.	.	.	.	.	.	.	.	.	.	.	.	.	.	.	.	.	.	.	.	.
GCA_016498045.1_PDT000660361.1	13	.	.	.	.	.	.	.	.	.	.	.	.	.	.	.	.	.	.	.	.	.	.	.	.	.	.	.	.	.	.	.	.	.	.	.	.	.	.	99.88;99.88	.	.	.	.	.	.	.	.	100.00;100.00
GCA_016498075.1_PDT000660358.1	18	.	90.24;90.24	.	.	.	.	.	.	.	100.00;100.00	.	.	.	.	.	.	.	.	.	.	.	.	.	.	.	.	.	.	.	.	100.00;100.00	.	.	.	.	82.51;82.51	.	.	.	.	.	.	.	.	.	.	.	.
GCA_016498085.1_PDT000660359.1	13	.	.	.	.	.	.	.	.	.	.	.	.	.	.	.	.	.	.	.	.	.	.	.	.	.	.	.	.	.	.	.	.	.	.	.	.	.	.	99.88;99.88;99.88;99.88;99.88;99.88;99.88;99.88;99.88	.	.	.	.	.	.	.	.	100.00;100.00
GCA_016498125.1_PDT000660363.1	12	.	.	.	.	.	.	.	.	.	.	.	.	.	.	.	.	.	.	.	.	.	.	.	.	.	.	.	.	.	.	.	.	.	.	.	.	.	.	99.88;99.88	.	.	.	.	.	.	.	.	100.00;100.00
GCA_016498145.1_PDT000662276.1	8	.	.	.	.	.	.	.	.	.	.	.	.	.	.	.	.	.	.	.	.	.	.	.	.	.	.	.	.	.	.	.	.	.	.	.	77.78;78.60	.	.	.	.	.	.	.	.	.	.	.	100.00;100.00;100.00
GCA_016498165.1_PDT000660360.1	17	.	100.00;100.00	.	.	.	.	.	.	.	.	.	.	.	.	.	.	.	.	.	.	.	.	.	.	.	.	.	.	.	.	.	.	.	.	.	.	.	.	99.88;99.88;99.88	.	.	.	.	.	.	.	.	.
GCA_016498185.1_PDT000660357.1	12	.	.	.	.	.	.	.	.	.	.	.	.	.	.	.	.	.	.	.	.	.	.	.	.	.	.	.	.	.	.	.	.	.	.	.	.	.	.	99.88;92.16;99.88	.	.	.	.	.	.	.	.	100.00;100.00
GCA_016498205.1_PDT000660362.1	12	.	.	.	.	.	.	.	.	.	.	.	.	.	.	.	.	.	.	.	.	.	.	.	.	.	.	.	.	.	.	.	.	.	.	.	.	.	.	99.88;99.88	.	.	.	.	.	.	.	.	100.00;100.00
GCA_016498225.1_PDT000662274.1	15	.	.	.	.	.	.	.	.	.	.	100.00;88.95	.	.	.	.	.	.	.	.	.	.	.	.	.	.	87.50	.	.	.	.	.	.	.	.	.	82.51;82.51	.	.	.	.	.	.	.	.	.	.	.	100.00;100.00
GCA_016498245.1_PDT000662275.1	15	.	.	.	.	.	.	.	.	.	.	88.76;88.95	.	.	.	.	.	.	.	.	.	.	.	.	.	.	87.50	.	.	.	.	.	.	.	.	.	82.51;82.51	.	.	.	.	.	.	.	.	.	.	.	100.00;100.00;100.00
GCA_016498265.1_PDT000660346.1	12	.	.	.	.	.	.	.	.	.	.	.	.	.	.	.	.	.	.	.	.	.	.	.	.	.	.	.	.	.	.	.	.	.	.	.	.	.	.	99.88;99.88	.	.	.	.	.	.	.	.	100.00;100.00
GCA_016498285.1_PDT000660355.1	11	.	.	.	.	.	.	.	.	.	.	.	.	.	.	.	.	.	.	.	.	.	.	.	.	.	.	.	.	.	.	.	.	.	.	.	.	.	.	99.88;99.88	.	.	.	.	.	.	.	.	.
GCA_016498305.1_PDT000660352.1	13	.	.	.	.	.	.	.	.	.	100.00;100.00	.	.	.	.	.	.	.	.	.	.	.	.	.	.	.	.	.	.	.	.	.	.	.	.	.	.	.	.	.	.	.	.	.	.	.	.	.	.
GCA_016498325.1_PDT000660353.1	17	.	100.00;100.00	.	.	.	.	.	.	.	.	.	.	.	.	.	.	.	.	.	.	.	.	.	.	.	.	.	.	.	.	.	.	.	.	.	.	.	.	99.88;99.88	.	.	.	.	.	.	.	.	.
GCA_016498345.1_PDT000660354.1	12	.	.	.	.	.	.	.	.	.	.	.	.	.	.	.	.	.	.	.	.	.	.	.	.	.	.	.	.	.	.	.	.	.	.	.	.	.	.	99.88;99.88	.	.	.	.	.	.	.	.	100.00;100.00
GCA_016498365.1_PDT000660351.1	12	.	.	.	.	.	.	.	.	.	.	.	.	.	.	.	.	.	.	.	.	.	.	.	.	.	.	.	.	.	.	.	.	.	.	.	82.51;82.51	.	.	.	.	.	.	.	.	.	.	.	100.00;100.00
GCA_016498385.1_PDT000660349.1	13	.	.	.	.	.	.	.	.	.	.	.	.	.	.	.	.	.	.	.	.	.	.	.	.	.	.	.	.	.	.	.	.	.	.	.	.	.	.	99.88;99.88	.	.	.	.	.	.	.	.	100.00;100.00
GCA_016498405.1_PDT000660350.1	17	.	100.00;100.00	.	.	.	.	.	.	.	.	.	.	.	.	.	.	.	.	.	.	.	.	.	.	.	.	.	.	.	.	.	.	.	.	.	.	.	.	99.88;99.88;99.88	.	.	.	.	.	.	.	.	.
GCA_016498425.1_PDT000660348.1	13	.	.	.	.	.	.	.	.	.	.	.	.	.	.	.	.	.	.	.	.	.	.	.	.	.	.	.	.	.	.	.	.	.	.	.	.	.	.	99.88;99.88	.	.	.	.	.	.	.	.	100.00;100.00
GCA_016498445.1_PDT000660347.1	17	.	100.00;100.00	.	.	.	100.00;100.00	.	.	.	.	.	.	.	.	100.00;100.00	.	.	.	.	.	.	.	.	.	.	.	.	.	.	.	.	.	.	.	.	.	.	.	99.88;99.88	.	.	.	.	.	.	.	.	.
GCA_016498465.1_PDT000660345.1	18	.	90.24;90.24;90.24;90.24	.	.	.	.	.	.	.	.	.	.	.	.	.	.	.	.	.	.	.	.	.	.	.	.	.	.	.	.	100.00;100.00;94.57;100.00	.	.	.	.	.	.	.	99.88;99.88	.	.	.	.	.	.	.	.	100.00;100.00
GCA_016498485.1_PDT000660343.1	17	.	100.00;100.00	.	.	.	.	.	.	.	.	.	.	.	.	.	.	.	.	.	.	.	.	.	.	.	.	.	.	.	.	.	.	.	.	.	.	.	.	99.88;99.88;99.88	.	.	.	.	.	.	.	.	.
GCA_016498505.1_PDT000660344.1	18	.	100.00;100.00	.	.	.	.	.	.	.	.	.	.	.	.	.	.	.	.	.	.	.	.	.	.	.	.	.	.	.	.	.	.	.	.	.	.	.	.	99.88;99.88	.	.	.	.	.	.	.	.	.
GCA_016498525.1_PDT000660341.1	12	.	.	.	.	.	.	.	.	.	.	.	.	.	.	.	.	.	.	.	.	.	.	.	.	.	.	.	.	.	.	.	.	.	.	.	.	.	.	99.88;86.94	.	.	.	.	.	.	.	.	100.00;100.00
GCA_016498545.1_PDT000660340.1	13	.	.	.	.	.	.	.	.	.	.	.	.	.	.	.	.	.	.	.	.	.	.	.	.	.	.	.	.	.	.	.	.	.	.	.	.	.	.	99.88	.	.	.	.	.	.	.	.	100.00;100.00
GCA_016498565.1_PDT000660342.1	12	.	.	.	.	.	.	.	.	.	.	.	.	.	.	.	.	.	.	.	.	.	.	.	.	.	.	.	.	.	.	.	.	.	.	.	.	.	.	99.88;99.88	.	.	.	.	.	.	.	.	100.00;100.00
GCA_016498585.1_PDT000660339.1	12	.	.	.	.	.	.	.	.	.	.	.	.	.	.	.	.	.	.	.	.	.	.	.	.	.	.	.	.	.	.	.	.	.	.	.	.	.	.	99.88;99.88	.	.	.	.	.	.	.	.	100.00;100.00
GCA_016498605.1_PDT000660337.1	17	.	90.24;90.24	.	.	.	.	.	.	.	100.00;100.00	.	.	.	.	.	.	.	.	.	.	.	.	.	.	.	.	.	.	.	.	100.00;100.00	.	.	.	.	.	.	.	.	.	.	.	.	.	.	.	.	99.88;100.00
GCA_016498625.1_PDT000660335.1	11	.	.	.	.	.	.	.	.	.	.	.	.	.	.	.	.	.	.	.	.	.	.	.	.	.	.	.	.	.	.	.	.	.	.	.	82.51;82.51	.	.	.	.	.	.	.	.	.	.	.	100.00;100.00
GCA_016498645.1_PDT000660332.1	11	.	.	.	.	.	100.00;100.00	.	.	.	.	.	.	.	.	100.00;100.00	.	.	.	.	.	.	.	.	.	.	.	.	.	.	.	.	.	.	.	.	.	.	.	99.88;99.88	.	.	.	.	.	.	.	.	.
GCA_016498665.1_PDT000660334.1	11	.	.	.	.	.	.	.	.	.	100.00;100.00	.	.	.	.	.	.	.	.	.	.	.	.	.	.	.	.	.	.	.	.	.	.	.	.	.	.	.	.	.	.	.	.	.	.	.	.	.	.
GCA_016498685.1_PDT000660333.1	18	.	90.24;90.24	.	.	.	.	.	.	.	.	.	.	.	.	.	.	.	.	.	.	.	.	.	.	.	.	.	.	.	.	100.00;100.00	.	.	.	.	.	.	.	99.88;99.88	.	.	.	.	.	.	.	.	99.88;100.00
GCA_016498705.1_PDT000660329.1	19	.	.	.	.	.	.	.	.	.	100.00;100.00	100.00;89.14	.	.	.	.	.	.	.	.	.	.	.	.	.	.	.	.	97.92;97.92	.	.	.	.	.	.	.	82.51;82.51	.	.	.	.	.	.	.	.	.	.	.	100.00;100.00
GCA_016498715.1_PDT000660328.1	13	.	.	.	.	.	.	.	.	.	.	.	.	.	.	.	.	.	.	.	.	.	.	.	.	.	.	.	.	.	.	.	.	.	.	.	.	.	.	99.88;99.88	.	.	.	.	.	.	.	.	100.00;100.00
GCA_016498745.1_PDT000660327.1	13	.	.	.	.	.	.	.	.	.	.	.	.	.	.	.	.	.	.	.	.	.	.	.	.	.	.	.	.	.	.	.	.	.	.	.	.	.	.	99.88;99.88	.	.	.	.	.	.	.	.	100.00;100.00
GCA_016498765.1_PDT000660330.1	13	.	.	.	.	.	.	.	.	.	100.00;100.00	.	.	.	.	.	.	.	.	.	.	.	.	.	.	.	.	.	.	.	.	.	.	.	.	.	.	.	.	.	100.00;100.00;100.00	.	.	.	.	.	.	.	.
GCA_016498785.1_PDT000660331.1	17	.	.	.	.	.	.	.	.	.	.	.	.	.	100.00;100.00	.	.	.	.	.	.	.	.	.	.	.	98.61	.	.	.	.	.	.	.	.	.	82.51	.	.	99.88;99.88	.	.	.	.	.	.	.	.	70.59;100.00;100.00
GCA_016498805.1_PDT000659854.1	15	.	.	.	.	.	.	.	.	.	.	.	.	.	.	.	.	.	.	.	.	.	.	.	.	.	.	.	.	.	.	.	.	.	.	.	82.51;82.51;82.51	.	.	99.88;99.88	.	.	.	.	.	.	.	.	100.00;100.00
GCA_016498825.1_PDT000659855.1	16	.	.	.	.	.	.	.	.	.	.	.	.	.	.	.	.	.	.	.	.	.	.	.	.	.	.	.	.	.	.	.	.	.	.	.	82.51;82.51;82.51	.	.	99.88;99.88	.	.	.	.	.	.	.	.	100.00;100.00
GCA_016498845.1_PDT000659852.1	10	.	.	.	.	.	.	.	.	.	.	.	.	.	.	.	.	.	.	.	.	.	.	.	.	.	.	.	.	.	.	.	100.00;100.00	.	.	.	.	.	.	98.88;87.81;99.88	.	.	.	.	.	.	.	.	.
GCA_016498865.1_PDT000659853.1	11	.	.	.	.	.	.	.	.	.	.	.	.	.	.	.	.	.	.	.	.	.	.	.	.	.	.	.	.	.	.	.	.	.	.	.	82.51;82.51;82.51	.	.	.	.	.	.	.	.	.	.	.	.
GCA_016498885.1_PDT000659851.1	11	.	.	.	.	.	.	.	.	.	.	.	.	.	.	.	.	.	.	.	.	.	.	.	.	.	.	.	.	.	.	.	.	.	.	.	82.51;82.51	.	.	.	.	.	.	.	.	.	.	.	.
GCA_016498905.1_PDT000659850.1	11	.	.	.	.	.	.	.	.	.	.	.	.	.	.	.	.	.	.	.	.	.	.	.	.	.	.	.	.	.	.	.	.	.	.	.	82.51;82.51;82.51	.	.	.	.	.	.	.	.	.	.	.	.
GCA_016498925.1_PDT000659849.1	11	.	.	.	.	.	.	.	.	.	.	.	.	.	.	.	.	.	.	.	.	.	.	.	.	.	.	.	.	.	.	.	.	.	.	.	82.51;82.51	.	.	.	.	.	.	.	.	.	.	.	.
GCA_016498945.1_PDT000659840.1	11	.	.	.	.	.	.	.	.	.	.	.	.	.	.	.	.	.	.	.	.	.	.	.	.	.	.	.	.	.	.	.	.	.	.	.	82.51;82.51;82.51	.	.	.	.	.	.	.	.	.	.	.	.
GCA_016498965.1_PDT000659841.1	15	.	.	.	.	.	.	.	.	.	.	100.00;88.95	.	.	.	.	.	.	.	.	.	.	.	.	.	.	87.50	.	.	.	.	.	.	.	.	.	82.51;82.51	.	.	.	.	.	.	.	.	.	.	.	74.51;100.00;100.00
GCA_016498985.1_PDT000659839.1	11	.	.	.	.	.	.	.	.	.	.	.	.	.	.	.	.	.	.	.	.	.	.	.	.	.	.	.	.	.	.	.	.	.	.	.	82.51;82.51	.	.	.	.	.	.	.	.	.	.	.	.
GCA_016499005.1_PDT000659842.1	11	.	.	.	.	.	.	.	.	.	.	.	.	.	.	.	.	.	.	.	.	.	.	.	.	.	.	.	.	.	.	.	.	.	.	.	82.51;82.51	.	.	.	.	.	.	.	.	.	.	.	.
GCA_016499025.1_PDT000659843.1	10	.	.	.	.	.	.	.	.	.	.	.	.	.	.	.	.	.	.	.	.	.	.	.	.	.	.	.	.	.	.	.	100.00;100.00	.	.	.	.	.	.	99.88;99.88;99.88	.	.	.	.	.	.	.	.	.
GCA_016499045.1_PDT000659848.1	10	.	.	.	.	.	.	.	.	.	.	.	.	.	.	.	.	.	.	.	.	.	.	.	.	.	.	.	.	.	.	.	100.00;100.00	.	.	.	.	.	.	98.63;99.88;99.88	.	.	.	.	.	.	.	.	.
GCA_016499065.1_PDT000660326.1	12	.	.	.	.	.	.	.	.	.	.	.	.	.	.	.	.	.	.	.	.	.	.	.	.	.	.	.	.	.	.	.	.	.	.	.	.	.	.	99.88;99.88	.	.	.	.	.	.	.	.	100.00;100.00
GCA_016499085.1_PDT000659846.1	12	.	.	.	.	.	.	.	.	.	.	.	.	.	.	.	.	.	.	.	.	.	.	.	.	.	.	.	.	.	.	.	.	.	.	.	82.51;82.51;82.51	.	.	.	.	.	.	.	.	.	.	.	.
GCA_016499105.1_PDT000659847.1	10	.	.	.	.	.	.	.	.	.	.	.	.	.	.	.	.	.	.	.	.	.	.	.	.	.	.	.	.	.	.	.	100.00;100.00	.	.	.	.	.	.	99.88;99.88;99.88	.	.	.	.	.	.	.	.	.
GCA_016499125.1_PDT000659845.1	18	.	.	.	.	.	.	.	.	.	.	.	.	.	.	.	.	.	.	.	.	.	.	.	.	.	.	.	.	.	.	.	.	.	.	.	82.51;82.51	.	.	99.88;99.88;99.88	.	.	.	.	.	.	.	.	100.00;100.00
GCA_016499145.1_PDT000659844.1	11	.	.	.	.	.	.	.	.	.	.	.	.	.	.	.	.	.	.	.	.	.	.	.	.	.	.	.	.	.	.	.	.	.	.	.	82.51;82.51	.	.	.	.	.	.	.	.	.	.	.	.
GCA_016499165.1_PDT000659838.1	10	.	.	.	.	.	.	.	.	.	.	.	.	.	.	.	.	.	.	.	.	.	.	.	.	.	.	.	.	.	.	.	100.00;100.00	.	.	.	.	.	.	99.88;99.88;99.88	.	.	.	.	.	.	.	.	.
GCA_016499185.1_PDT000659837.1	10	.	.	.	.	.	.	.	.	.	.	.	.	.	.	.	.	.	.	.	.	.	.	.	.	.	.	.	.	.	.	.	100.00;100.00	.	.	.	.	.	.	99.88;99.88;99.88	.	.	.	.	.	.	.	.	.
GCA_016499445.1_PDT000659827.1	11	.	.	.	.	.	.	.	.	.	.	.	.	.	.	.	.	.	.	.	.	.	.	.	.	.	.	.	.	.	.	.	.	.	.	.	82.51;82.51	.	.	.	.	.	.	.	.	.	.	.	.
GCA_016499465.1_PDT000659829.1	11	.	.	.	.	.	.	.	.	.	.	.	.	.	.	.	.	.	.	.	.	.	.	.	.	.	.	.	.	.	.	.	.	.	.	.	82.51;82.51	.	.	.	.	.	.	.	.	.	.	.	.
GCA_016499485.1_PDT000659828.1	11	.	.	.	.	.	.	.	.	.	.	.	.	.	.	.	.	.	.	.	.	.	.	.	.	.	.	.	.	.	.	.	.	.	.	.	82.51;82.51	.	.	.	.	.	.	.	.	.	.	.	.
GCA_016499525.1_PDT000659830.1	12	.	.	.	.	.	.	.	.	.	.	.	.	.	.	.	.	.	.	.	.	.	.	.	.	.	.	.	.	.	.	.	100.00;100.00	.	.	.	82.51;82.51	.	.	.	.	.	.	.	.	.	.	.	.
GCA_016499585.1_PDT000659826.1	11	.	.	.	.	.	.	.	.	.	.	.	.	.	.	.	.	.	.	.	.	.	.	.	.	.	.	.	.	.	.	.	.	.	.	.	82.51;82.51	.	.	.	.	.	.	.	.	.	.	.	.
GCA_016499705.1_PDT000659836.1	11	.	.	.	.	.	.	.	.	.	.	.	.	.	.	.	.	.	.	.	.	.	.	.	.	.	.	.	.	.	.	.	.	.	.	.	82.51;82.51	.	.	.	.	.	.	.	.	.	.	.	.
GCA_016499725.1_PDT000659834.1	16	.	.	.	.	.	.	.	.	.	.	.	.	.	.	.	.	.	.	.	.	.	.	.	.	.	.	.	.	.	.	.	.	.	.	.	82.51;82.51	.	.	99.88;99.88	.	.	.	.	.	.	.	.	100.00;100.00
GCA_016499745.1_PDT000659835.1	12	.	.	.	.	.	.	.	.	.	.	100.00;88.95	.	.	.	.	.	.	.	.	.	.	.	.	.	.	.	.	.	.	.	.	.	.	.	.	80.66;82.51;82.51	.	.	.	.	.	.	.	.	.	.	.	100.00;100.00
GCA_016499785.1_PDT000659833.1	16	.	.	.	.	.	.	.	.	.	.	.	.	.	.	.	.	.	.	.	.	.	.	.	.	.	.	.	.	.	.	.	.	.	.	.	82.51;82.51	.	.	99.88;99.88	.	.	.	.	.	.	.	.	100.00;100.00
GCA_016499805.1_PDT000659832.1	19	.	90.24;90.24;90.24	.	.	.	.	.	.	.	100.00;100.00	.	.	.	.	.	.	.	.	.	.	.	.	.	.	.	.	.	.	.	.	100.00;100.00;100.00	.	.	.	.	82.51;82.51;82.51	.	.	.	.	.	.	.	.	.	.	.	.
GCA_016499905.1_PDT000659831.1	12	.	.	.	.	.	.	.	.	.	.	.	.	.	.	.	.	.	.	.	.	.	.	.	.	.	.	.	.	.	.	.	100.00;100.00	.	.	.	82.51;82.51	.	.	.	.	.	.	.	.	.	.	.	.
GCA_016499935.1_PDT000659821.1	12	.	.	.	.	.	.	.	.	.	.	.	.	.	.	.	.	.	.	.	.	.	.	.	.	.	.	.	.	.	.	.	.	.	.	.	82.51;82.51	.	.	.	.	.	.	.	.	.	.	.	.
GCA_016499985.1_PDT000659825.1	20	.	90.24;90.24;90.24;90.24	.	.	.	.	.	.	.	100.00;100.00	.	.	.	.	.	.	.	.	.	.	.	.	.	.	.	.	.	.	.	.	100.00;75.28;75.28;100.00	.	.	.	.	82.51;82.51;82.51;82.51	.	.	.	.	.	.	.	.	.	.	.	.
GCA_016500005.1_PDT000659823.1	15	.	.	.	.	.	.	.	.	.	.	100.00;88.95	.	.	.	.	.	.	.	.	.	.	.	.	.	.	98.99	.	.	.	.	.	.	.	.	.	82.51;82.51	.	.	.	.	.	.	.	.	.	.	.	100.00;100.00
GCA_016500045.1_PDT000659822.1	10	.	.	.	.	.	.	.	.	.	.	.	.	.	.	.	.	.	.	.	.	.	.	.	.	.	.	.	.	.	.	.	100.00;100.00	.	.	.	.	.	.	99.88;99.88;99.88	.	.	.	.	.	.	.	.	.
GCA_016500145.1_PDT000659820.1	14	.	.	.	.	.	.	.	.	.	.	100.00;88.95	.	.	.	.	.	.	.	.	.	.	.	.	.	.	.	.	.	.	.	.	.	.	.	.	82.51;82.51;82.51	.	.	.	.	.	.	.	.	.	.	.	100.00;100.00
GCA_016500165.1_PDT000659819.1	17	.	.	.	.	.	.	.	.	.	100.00	.	.	.	.	.	.	.	.	.	.	.	.	.	.	.	.	.	.	.	.	.	.	.	.	.	82.51;82.51	.	.	99.88;99.88;99.88	.	.	.	.	.	.	.	.	.
GCA_016500245.1_PDT000659816.1	13	.	.	.	.	.	.	.	.	.	.	.	.	.	.	.	.	.	.	.	.	.	.	.	.	.	.	.	.	.	.	.	.	.	.	.	.	.	.	99.88;99.88	.	.	.	.	.	.	.	.	100.00;100.00
GCA_016500965.1_PDT000659818.1	11	.	.	.	.	.	.	.	.	.	.	.	.	.	.	.	.	.	.	.	.	.	.	.	.	.	.	.	.	.	.	.	.	.	.	.	82.51;82.51	.	.	.	.	.	.	.	.	.	.	.	.
GCA_016500985.1_PDT000659817.1	17	.	.	.	.	.	.	.	.	.	.	.	.	.	.	.	.	.	.	.	.	.	.	.	.	.	98.99	.	.	.	.	.	.	.	.	.	.	.	.	99.88;99.88	.	.	.	.	.	.	.	.	100.00;100.00
GCA_016501005.1_PDT000659824.1	11	.	.	.	.	.	.	.	.	.	.	.	.	.	.	.	.	.	.	.	.	.	.	.	.	.	.	.	.	.	.	.	.	.	.	.	82.51;82.51	.	.	.	.	.	.	.	.	.	.	.	.
GCA_016501035.1_PDT000659814.1	17	.	.	.	.	.	.	.	.	.	100.00;100.00	.	.	.	.	.	.	.	.	.	.	.	.	.	.	.	.	.	.	.	.	.	.	.	.	.	82.51;82.51;82.51	.	.	99.88;99.88;99.88	.	.	.	.	.	.	.	.	.
GCA_016501055.1_PDT000659815.1	17	.	.	.	.	.	.	.	.	.	100.00;100.00	.	.	.	.	.	.	.	.	.	.	.	.	.	.	.	.	.	.	.	.	.	.	.	.	.	82.51;82.51	.	.	99.88;99.88;99.88	.	.	.	.	.	.	.	.	.
GCA_016501125.1_PDT000659813.1	17	.	.	.	.	.	.	.	.	.	100.00;100.00	.	.	.	.	.	.	.	.	.	.	.	.	.	.	.	.	.	.	.	.	.	.	.	.	.	82.51;82.51	.	.	99.88;99.88;99.88	.	.	.	.	.	.	.	.	.
GCA_016501185.1_PDT000659811.1	17	.	.	.	.	.	.	.	.	.	.	.	.	.	.	.	.	.	.	.	.	.	.	.	.	.	.	.	.	.	.	.	.	.	.	.	82.51;82.51	.	.	99.88;99.88	.	.	.	.	.	.	.	.	100.00;100.00
GCA_016501205.1_PDT000659812.1	13	.	.	.	.	.	.	.	.	.	.	.	.	.	.	.	.	.	.	.	.	.	.	.	.	.	.	.	.	.	.	.	.	.	.	.	.	.	.	99.88;99.88	.	.	.	.	.	.	.	.	100.00;100.00
GCA_016501225.1_PDT000659810.1	15	.	.	.	.	.	.	.	.	.	.	100.00;88.95	.	.	.	.	.	.	.	.	.	.	.	.	.	.	98.99	.	.	.	.	.	.	.	.	.	82.51;82.51	.	.	.	.	.	.	.	.	.	.	.	100.00;100.00
GCA_016501245.1_PDT000659809.1	10	.	.	.	.	.	.	.	.	.	.	100.00;100.00	.	.	.	.	.	.	.	.	.	.	.	.	.	.	.	.	.	.	.	.	.	.	.	.	82.51;82.51	.	.	.	.	.	.	.	.	.	.	.	100.00;100.00
GCA_016501345.1_PDT000659808.1	11	.	.	.	.	.	.	.	.	.	.	.	.	.	.	.	.	.	.	.	.	.	.	.	.	.	.	.	.	.	.	.	100.00;100.00	.	.	.	.	.	.	99.88;99.88;99.88	.	.	.	.	.	.	.	.	.
GCA_016501375.1_PDT000659807.1	10	.	.	.	.	.	.	.	.	.	.	.	.	.	.	.	.	.	.	.	.	.	.	.	.	.	.	.	.	.	.	.	100.00;100.00	.	.	.	.	.	.	99.88;99.88;99.88	.	.	.	.	.	.	.	.	.
GCA_016501605.1_PDT000659806.1	15	.	.	.	.	.	.	.	.	.	.	.	.	.	.	.	.	.	.	.	.	.	.	.	.	.	.	.	.	.	.	.	.	.	.	.	82.51;82.51	.	.	99.88;99.88	.	.	.	.	.	.	.	.	100.00;100.00
GCA_016501635.1_PDT000659805.1	14	.	.	.	.	.	.	.	.	.	.	100.00;88.95	.	.	.	.	.	.	.	.	.	.	.	.	.	.	.	.	.	.	.	.	.	.	.	.	82.51;82.51;82.51	.	.	.	.	.	.	.	.	.	.	.	100.00;100.00
GCA_016501705.1_PDT000659804.1	15	.	.	.	.	.	.	.	.	.	.	100.00;88.95	.	.	.	.	.	.	.	.	.	.	.	.	.	.	98.99	.	.	.	.	.	.	.	.	.	82.51;82.51	.	.	.	.	.	.	.	.	.	.	.	100.00;100.00
GCA_016501725.1_PDT000659802.1	16	.	.	.	.	.	.	.	.	.	.	.	.	.	.	.	.	.	.	.	.	.	.	.	.	.	.	.	.	.	.	.	.	.	.	.	82.51;82.51	.	.	99.88;99.88	.	.	.	.	.	.	.	.	100.00;100.00
GCA_016501765.1_PDT000659803.1	11	.	.	.	.	.	.	.	.	.	.	.	.	.	.	.	.	.	.	.	.	.	.	.	.	.	.	.	.	.	.	.	.	.	.	.	82.51;82.51;82.51	.	.	.	.	.	.	.	.	.	.	.	.
GCA_016501845.1_PDT000659801.1	16	.	.	.	.	.	.	.	.	.	.	.	.	.	.	.	.	.	.	.	.	.	.	.	.	.	.	.	.	.	.	.	.	.	.	.	82.51;82.51;82.51	.	.	99.88;99.88;99.88	.	.	.	.	.	.	.	.	.
GCA_016502685.1_PDT000659797.1	11	.	.	.	.	.	.	.	.	.	.	100.00;88.95	.	.	.	.	.	.	.	.	.	.	.	.	.	.	.	.	.	.	.	.	.	.	.	.	82.51;82.51;82.51	.	.	.	.	.	.	.	.	.	.	.	.
GCA_016502705.1_PDT000659796.1	11	.	.	.	.	.	.	.	.	.	.	100.00;88.95	.	.	.	.	.	.	.	.	.	.	.	.	.	.	.	.	.	.	.	.	.	.	.	.	82.51;82.51	.	.	.	.	.	.	.	.	.	.	.	.
GCA_016502735.1_PDT000659800.1	11	.	.	.	.	.	.	.	.	.	.	.	.	.	.	.	.	.	.	.	.	.	.	.	.	.	.	.	.	.	.	.	.	.	.	.	82.51;82.51	.	.	.	.	.	.	.	.	.	.	.	.
GCA_016502775.1_PDT000659798.1	21	.	90.24;90.24	.	.	.	.	.	.	.	100.00;100.00;100.00	.	.	.	.	.	.	.	.	.	.	.	.	.	.	.	.	.	.	.	.	.	100.00;100.00	.	.	.	83.54;83.54	.	.	.	.	.	.	.	.	.	.	.	.
GCA_016502805.1_PDT000659799.1	11	.	.	.	.	.	.	.	.	.	.	.	.	.	.	.	.	.	.	.	.	.	.	.	.	.	.	.	.	.	.	.	.	.	.	.	82.51;82.51	.	.	.	.	.	.	.	.	.	.	.	.
GCA_016502885.1_PDT000659795.1	11	.	.	.	.	.	.	.	.	.	.	100.00;88.95	.	.	.	.	.	.	.	.	.	.	.	.	.	.	.	.	.	.	.	.	.	.	.	.	82.51;82.51;82.51	.	.	.	.	.	.	.	.	.	.	.	.
GCA_016502905.1_PDT000659794.1	12	.	.	.	.	.	.	.	.	.	.	100.00;88.95	.	.	.	.	.	.	.	.	.	.	.	.	.	.	70.08	.	.	.	.	.	.	.	.	.	82.51;82.51	.	.	.	.	.	.	.	.	.	.	.	.
GCA_016502925.1_PDT000659793.1	16	.	.	.	.	.	.	.	.	.	.	.	.	.	.	.	.	.	.	.	.	.	.	.	.	.	.	.	.	.	.	.	.	.	.	.	82.51;82.51	.	.	99.88;99.88	.	.	.	.	.	.	.	.	100.00;100.00
GCA_016502945.1_PDT000659791.1	16	.	.	.	.	.	.	.	.	.	.	.	.	.	.	.	.	.	.	.	.	.	.	.	.	.	.	.	.	.	.	.	.	.	.	.	82.51;82.51	.	.	99.88;99.88	.	.	.	.	.	.	.	.	100.00;100.00
GCA_016503035.1_PDT000659792.1	17	.	.	.	.	.	.	.	.	.	.	100.00;88.95	.	.	.	.	.	.	.	.	.	.	.	.	.	.	.	.	.	.	.	.	.	.	.	.	80.66;82.51;82.51	.	.	99.88;99.88	.	.	.	.	.	.	.	.	100.00;100.00;100.00
GCA_016503065.1_PDT000659787.1	9	.	.	.	.	.	.	.	.	.	.	.	.	.	.	.	.	.	.	.	.	.	.	.	.	.	.	.	.	.	.	.	.	.	.	.	82.51;82.51	.	.	.	.	.	.	.	.	.	.	.	.
GCA_016503145.1_PDT000659790.1	11	.	.	.	.	.	.	.	.	.	.	.	.	.	.	.	.	.	.	.	.	.	.	.	.	.	.	.	.	.	.	.	.	.	.	.	82.51;82.51	.	.	.	.	.	.	.	.	.	.	.	.
GCA_016503165.1_PDT000659789.1	16	.	.	.	.	.	.	.	.	.	.	.	.	.	.	.	.	.	.	.	.	.	.	.	.	.	.	.	.	.	.	.	.	.	.	.	82.51;82.51	.	.	99.88;99.88	.	.	.	.	.	.	.	.	100.00;100.00
GCA_016503185.1_PDT000659788.1	11	.	.	.	.	.	.	.	.	.	.	.	.	.	.	.	.	.	.	.	.	.	.	.	.	.	.	.	.	.	.	.	100.00;100.00	.	.	.	.	.	.	99.88;99.88;99.88;99.88	.	.	.	.	.	.	.	.	.
GCA_016503205.1_PDT000659786.1	13	.	.	.	.	.	.	.	.	.	.	100.00;88.95	.	.	.	.	.	.	.	.	.	.	.	.	.	.	.	.	.	.	.	.	.	.	.	.	82.51;82.51	.	.	.	.	.	.	.	.	.	.	.	.
GCA_016503275.1_PDT000659785.1	13	.	.	.	.	.	.	.	.	.	.	100.00;88.95	.	.	.	.	.	.	.	.	.	.	.	.	.	.	.	.	.	.	.	.	.	.	.	.	82.51;82.51	.	.	.	.	.	.	.	.	.	.	.	.
GCA_016503315.1_PDT000659783.1	14	.	.	.	.	.	.	.	.	.	.	88.76;88.95	.	.	.	.	.	.	.	.	.	.	.	.	.	.	.	.	.	.	.	.	.	.	.	.	82.51;82.51;82.51	.	.	.	.	.	.	.	.	.	.	.	100.00;100.00
GCA_016503335.1_PDT000659784.1	13	.	.	.	.	.	.	.	.	.	.	100.00;100.00	.	.	.	.	.	.	.	.	.	.	.	.	.	.	.	.	.	.	.	.	.	.	.	.	82.51;82.51	.	.	.	.	.	.	.	.	.	.	.	100.00;100.00;100.00
GCA_016503405.1_PDT000659780.1	14	.	.	.	.	.	.	.	.	.	.	88.76;88.95	.	.	.	.	.	.	.	.	.	.	.	.	.	.	.	.	.	.	.	.	.	.	.	.	82.51;82.51;82.51	.	.	.	.	.	.	.	.	.	.	.	100.00;100.00;100.00
GCA_016503425.1_PDT000659781.1	10	.	.	.	.	.	.	.	.	.	.	.	.	.	.	.	.	.	.	.	.	.	.	.	.	.	.	.	.	.	.	.	.	.	.	.	.	.	.	99.88;99.88;99.88	.	.	.	.	.	.	.	.	.
GCA_016503445.1_PDT000659782.1	11	.	.	.	.	.	.	.	.	.	.	.	.	.	.	.	.	.	.	.	.	.	.	.	.	.	.	.	.	.	.	.	100.00;100.00	.	.	.	.	.	.	99.88;99.88;99.88;99.88	.	.	.	.	.	.	.	.	.
GCA_016503465.1_PDT000659778.1	13	.	.	.	.	.	.	.	.	.	.	.	.	.	.	.	.	.	.	.	.	.	.	.	.	.	.	.	.	.	.	.	.	.	.	.	.	.	.	99.88;99.88	.	.	.	.	.	.	.	.	100.00;100.00
GCA_016503515.1_PDT000659779.1	15	.	.	.	.	.	.	.	.	.	.	88.76;88.95	.	.	.	.	.	.	.	.	.	.	.	.	.	.	98.99	.	.	.	.	.	.	.	.	.	82.51;82.51	.	.	.	.	.	.	.	.	.	.	.	100.00;100.00
GCA_016503605.1_PDT000659777.1	10	.	.	.	.	.	.	.	.	.	.	.	.	.	.	.	.	.	.	.	.	.	.	.	.	.	.	.	.	.	.	.	100.00;100.00	.	.	.	.	.	.	99.88;99.88;99.88;99.88	.	.	.	.	.	.	.	.	.
GCA_016504205.1_PDT000659772.1	14	.	.	.	.	.	.	.	.	.	.	100.00;88.95	.	.	.	.	.	.	.	.	.	.	.	.	.	.	.	.	.	.	.	.	.	.	.	.	82.51;82.51;75.72	.	.	.	.	.	.	.	.	.	.	.	.
GCA_016504235.1_PDT000659775.1	18	.	.	.	.	.	.	.	.	.	.	.	.	.	.	.	.	.	.	.	.	.	.	.	.	.	.	.	.	.	.	.	.	.	.	.	82.51;82.51	.	.	99.88;98.01;99.88	.	.	.	.	.	.	.	.	99.51;100.00
GCA_016504265.1_PDT000659776.1	10	.	.	.	.	.	.	.	.	.	.	.	.	.	.	.	.	.	.	.	.	.	.	.	.	.	.	.	.	.	.	.	100.00;100.00	.	.	.	.	.	.	99.88;99.88;99.88	.	.	.	.	.	.	.	.	.
GCA_016504295.1_PDT000659773.1	13	.	.	.	.	.	.	.	.	.	.	.	.	.	.	.	.	.	.	.	.	.	.	.	.	.	.	.	.	.	.	.	.	.	.	.	82.51;82.51	.	.	.	.	.	.	.	.	.	.	.	100.00;100.00;100.00
GCA_016504315.1_PDT000659774.1	17	.	.	.	.	.	.	.	.	.	.	.	.	.	.	.	.	.	.	.	.	.	.	.	.	.	.	.	.	.	.	.	.	.	.	.	82.51;82.51	.	.	99.88;99.88;99.88	.	.	.	.	.	.	.	.	.
GCA_016504375.1_PDT000659771.1	13	.	.	.	.	.	.	.	.	.	.	100.00;88.95	.	.	.	.	.	.	.	.	.	.	.	.	.	.	.	.	.	.	.	.	.	.	.	.	82.51;82.51	.	.	.	.	.	.	.	.	.	.	.	.
GCA_016504425.1_PDT000659767.1	13	.	.	.	.	.	.	.	.	.	.	100.00;88.95	.	.	.	.	.	.	.	.	.	.	.	.	.	.	.	.	.	.	.	.	.	.	.	.	82.51;82.51;82.51	.	.	.	.	.	.	.	.	.	.	.	.
GCA_016504445.1_PDT000659769.1	13	.	.	.	.	.	.	.	.	.	.	100.00;88.95	.	.	.	.	.	.	.	.	.	.	.	.	.	.	.	.	.	.	.	.	.	.	.	.	82.51;82.51;82.51;82.51	.	.	.	.	.	.	.	.	.	.	.	.
GCA_016504455.1_PDT000659768.1	13	.	.	.	.	.	.	.	.	.	.	.	.	.	.	.	.	.	.	.	.	.	.	.	.	.	.	.	.	.	.	.	.	.	.	.	82.51;82.51	.	.	.	.	.	.	.	.	.	.	.	100.00;100.00
GCA_016504525.1_PDT000659770.1	12	.	.	.	.	.	.	.	.	.	.	.	.	.	.	.	.	.	.	.	.	.	.	.	.	.	.	.	.	.	.	.	.	.	.	.	82.51;82.51;82.51	.	.	.	.	.	.	.	.	.	.	.	100.00;100.00
GCA_016504615.1_PDT000659766.1	10	.	.	.	.	.	.	.	.	.	.	.	.	.	.	.	.	.	.	.	.	.	.	.	.	.	.	.	.	.	.	.	100.00;100.00	.	.	.	.	.	.	99.88;99.88;99.88	.	.	.	.	.	.	.	.	.
GCA_016504685.1_PDT000659764.1	13	.	.	.	.	.	.	.	.	.	.	88.76;88.95	.	.	.	.	.	.	.	.	.	.	.	.	.	.	.	.	.	.	.	.	.	.	.	.	82.51;82.51;82.51	.	.	.	.	.	.	.	.	.	.	.	.
GCA_016504705.1_PDT000659765.1	14	.	.	.	.	.	.	.	.	.	.	100.00;88.95	.	.	.	.	.	.	.	.	.	.	.	.	.	.	.	.	.	.	.	.	.	.	.	.	82.51;82.51;82.51	.	.	.	.	.	.	.	.	.	.	.	.
GCA_016505755.1_PDT000618218.1	3	.	.	.	.	.	.	.	.	.	.	.	.	.	.	.	.	.	.	.	.	.	.	.	.	.	.	.	.	.	.	.	.	.	.	.	.	.	.	.	.	.	.	.	.	.	.	.	.
GCA_016505775.1_PDT000618991.1	13	.	.	.	.	.	.	.	.	.	.	.	.	.	.	.	.	.	.	.	.	.	.	.	.	.	.	.	.	.	.	.	.	.	.	.	.	.	.	99.88;99.88	.	.	.	.	.	.	.	.	100.00;100.00
GCA_016505795.1_PDT000444132.1	2	.	.	.	.	.	.	.	.	.	.	.	.	.	.	.	.	.	.	.	.	.	.	.	.	.	.	.	.	.	.	.	.	.	.	.	.	.	.	.	.	.	.	.	.	.	.	.	.
GCA_016505845.1_PDT000571021.1	9	.	.	.	.	.	100.00;100.00	.	.	.	.	.	.	.	.	100.00;100.00	.	.	.	.	.	.	.	.	.	.	.	.	.	.	.	.	.	.	.	.	.	.	.	99.88;99.88	.	.	.	.	.	.	.	.	.
GCA_016505865.1_PDT000618219.1	17	.	.	.	.	.	.	.	.	.	.	.	.	.	.	.	.	.	.	.	.	.	.	.	.	.	.	.	.	.	.	.	.	.	.	.	82.51;82.51	.	.	99.88;99.88	.	.	.	.	.	.	.	.	100.00;100.00
GCA_016507405.1_PDT000618217.1	3	.	.	.	.	.	.	.	.	.	.	.	.	.	.	.	.	.	.	.	.	.	.	.	.	.	.	.	.	.	.	.	.	.	.	.	.	.	.	.	.	.	.	.	.	.	.	.	.
GCA_016507415.1_PDT000444007.1	4	.	.	.	.	.	.	.	.	.	.	.	.	.	.	.	.	.	.	.	.	.	.	.	.	.	.	.	.	.	.	.	.	.	.	.	.	.	.	.	.	.	.	.	.	.	.	.	.
GCA_016507445.1_PDT000618992.1	11	.	.	.	.	.	.	.	.	.	.	.	.	.	.	.	.	.	.	.	.	.	.	.	.	.	.	.	.	.	.	.	.	.	.	.	.	.	.	99.88;99.88	.	.	.	.	.	.	.	.	.
GCA_016507525.1_PDT000443995.1	6	.	.	.	.	.	.	.	.	.	.	.	.	.	.	.	.	.	.	.	.	.	.	.	.	.	.	.	.	.	.	.	.	.	.	.	.	.	.	.	.	.	.	.	.	.	.	.	.
GCA_016507565.1_PDT000443969.1	6	.	.	.	.	.	.	.	.	.	.	.	.	.	.	.	.	.	.	.	.	.	.	.	.	.	.	.	.	.	.	.	.	.	.	.	.	.	.	.	.	.	.	.	.	.	.	.	.
GCA_016507585.1_PDT000444123.1	3	.	.	.	.	.	.	.	.	.	.	.	.	.	.	.	.	.	.	.	.	.	.	.	.	.	.	.	.	.	.	.	.	.	.	.	.	.	.	.	.	.	.	.	.	.	.	.	.
GCA_016507705.1_PDT000443714.1	6	.	.	.	.	.	.	.	.	.	.	.	.	.	.	.	.	.	.	.	.	.	.	.	.	.	.	.	.	.	.	.	100.00;100.00	.	.	.	.	.	.	.	.	.	.	.	.	.	.	.	.
GCA_016507725.1_PDT000443734.1	4	.	.	.	.	.	.	.	.	.	.	.	.	.	.	.	.	.	.	.	.	.	.	.	.	.	.	.	.	.	.	.	.	.	.	.	.	.	.	.	.	.	.	.	.	.	.	.	.
GCA_016507755.1_PDT000444128.1	3	.	.	.	.	.	.	.	.	.	.	.	.	.	.	.	.	.	.	.	.	.	.	.	.	.	.	.	.	.	.	.	.	.	.	.	.	.	.	.	.	.	.	.	.	.	.	.	.
GCA_016507785.1_PDT000443709.1	4	.	.	.	.	.	.	.	.	.	.	.	.	.	.	.	.	.	.	.	.	.	.	.	.	.	.	.	.	.	.	.	.	.	.	.	.	.	.	.	.	.	.	.	.	.	.	.	.
GCA_016507815.1_PDT000441531.1	3	.	.	.	.	.	.	.	.	.	.	.	.	.	.	.	.	.	.	.	.	.	.	.	.	.	.	.	.	.	.	.	.	.	.	.	.	.	.	.	.	.	.	.	.	.	.	.	.
GCA_016507905.1_PDT000441525.1	3	.	.	.	.	.	.	.	.	.	.	.	.	.	.	.	.	.	.	.	.	.	.	.	.	.	.	.	.	.	.	.	.	.	.	.	.	.	.	.	.	.	.	.	.	.	.	.	.
GCA_016507925.1_PDT000441526.1	3	.	.	.	.	.	.	.	.	.	.	.	.	.	.	.	.	.	.	.	.	.	.	.	.	.	.	.	.	.	.	.	.	.	.	.	.	.	.	.	.	.	.	.	.	.	.	.	.
GCA_016507995.1_PDT000441523.1	3	.	.	.	.	.	.	.	.	.	.	.	.	.	.	.	.	.	.	.	.	.	.	.	.	.	.	.	.	.	.	.	.	.	.	.	.	.	.	.	.	.	.	.	.	.	.	.	.
GCA_016508015.1_PDT000441524.1	3	.	.	.	.	.	.	.	.	.	.	.	.	.	.	.	.	.	.	.	.	.	.	.	.	.	.	.	.	.	.	.	.	.	.	.	.	.	.	.	.	.	.	.	.	.	.	.	.
GCA_016508025.1_PDT000441522.1	3	.	.	.	.	.	.	.	.	.	.	.	.	.	.	.	.	.	.	.	.	.	.	.	.	.	.	.	.	.	.	.	.	.	.	.	.	.	.	.	.	.	.	.	.	.	.	.	.
GCA_016508105.1_PDT000441521.1	3	.	.	.	.	.	.	.	.	.	.	.	.	.	.	.	.	.	.	.	.	.	.	.	.	.	.	.	.	.	.	.	.	.	.	.	.	.	.	.	.	.	.	.	.	.	.	.	.
GCA_016508155.1_PDT000441520.1	3	.	.	.	.	.	.	.	.	.	.	.	.	.	.	.	.	.	.	.	.	.	.	.	.	.	.	.	.	.	.	.	.	.	.	.	.	.	.	.	.	.	.	.	.	.	.	.	.
GCA_016508185.1_PDT000441519.1	3	.	.	.	.	.	.	.	.	.	.	.	.	.	.	.	.	.	.	.	.	.	.	.	.	.	.	.	.	.	.	.	.	.	.	.	.	.	.	.	.	.	.	.	.	.	.	.	.
GCA_016508215.1_PDT000441518.1	3	.	.	.	.	.	.	.	.	.	.	.	.	.	.	.	.	.	.	.	.	.	.	.	.	.	.	.	.	.	.	.	.	.	.	.	.	.	.	.	.	.	.	.	.	.	.	.	.
GCA_016508735.1_PDT000441513.1	3	.	.	.	.	.	.	.	.	.	.	.	.	.	.	.	.	.	.	.	.	.	.	.	.	.	.	.	.	.	.	.	.	.	.	.	.	.	.	.	.	.	.	.	.	.	.	.	.
GCA_016508755.1_PDT000441515.1	3	.	.	.	.	.	.	.	.	.	.	.	.	.	.	.	.	.	.	.	.	.	.	.	.	.	.	.	.	.	.	.	.	.	.	.	.	.	.	.	.	.	.	.	.	.	.	.	.
GCA_016508775.1_PDT000441517.1	3	.	.	.	.	.	.	.	.	.	.	.	.	.	.	.	.	.	.	.	.	.	.	.	.	.	.	.	.	.	.	.	.	.	.	.	.	.	.	.	.	.	.	.	.	.	.	.	.
GCA_016508795.1_PDT000441516.1	3	.	.	.	.	.	.	.	.	.	.	.	.	.	.	.	.	.	.	.	.	.	.	.	.	.	.	.	.	.	.	.	.	.	.	.	.	.	.	.	.	.	.	.	.	.	.	.	.
GCA_016508815.1_PDT000441512.1	3	.	.	.	.	.	.	.	.	.	.	.	.	.	.	.	.	.	.	.	.	.	.	.	.	.	.	.	.	.	.	.	.	.	.	.	.	.	.	.	.	.	.	.	.	.	.	.	.
GCA_016508835.1_PDT000441509.1	3	.	.	.	.	.	.	.	.	.	.	.	.	.	.	.	.	.	.	.	.	.	.	.	.	.	.	.	.	.	.	.	.	.	.	.	.	.	.	.	.	.	.	.	.	.	.	.	.
GCA_016508855.1_PDT000441511.1	3	.	.	.	.	.	.	.	.	.	.	.	.	.	.	.	.	.	.	.	.	.	.	.	.	.	.	.	.	.	.	.	.	.	.	.	.	.	.	.	.	.	.	.	.	.	.	.	.
GCA_016508875.1_PDT000441508.1	11	.	.	.	.	.	.	.	.	.	.	100.00;100.00	.	.	.	.	.	.	.	.	.	.	.	.	.	.	.	.	.	.	.	.	.	.	.	.	82.51;82.51	.	.	99.88;99.88	.	.	.	.	.	.	.	.	.
GCA_016508895.1_PDT000441510.1	3	.	.	.	.	.	.	.	.	.	.	.	.	.	.	.	.	.	.	.	.	.	.	.	.	.	.	.	.	.	.	.	.	.	.	.	.	.	.	.	.	.	.	.	.	.	.	.	.
GCA_016508915.1_PDT000441507.1	11	.	.	.	.	.	.	.	.	.	.	100.00;100.00	.	.	.	.	.	.	.	.	.	.	.	.	.	.	.	.	.	.	.	.	.	.	.	.	82.51;82.51	.	.	99.88;99.88	.	.	.	.	.	.	.	.	.
GCA_016508935.1_PDT000441505.1	3	.	.	.	.	.	.	.	.	.	.	.	.	.	.	.	.	.	.	.	.	.	.	.	.	.	.	.	.	.	.	.	.	.	.	.	.	.	.	.	.	.	.	.	.	.	.	.	.
GCA_016508955.1_PDT000441504.1	11	.	.	.	.	.	.	.	.	.	.	100.00;100.00	.	.	.	.	.	.	.	.	.	.	.	.	.	.	.	.	.	.	.	.	.	.	.	.	82.51;82.51	.	.	99.88;99.88	.	.	.	.	.	.	.	.	.
GCA_016508975.1_PDT000441499.1	11	.	.	.	.	.	.	.	.	.	.	100.00;100.00	.	.	.	.	.	.	.	.	.	.	.	.	.	.	.	.	.	.	.	.	.	.	.	.	82.51;82.51	.	.	99.88;99.88	.	.	.	.	.	.	.	.	.
GCA_016508995.1_PDT000441500.1	11	.	.	.	.	.	.	.	.	.	.	100.00;100.00	.	.	.	.	.	.	.	.	.	.	.	.	.	.	.	.	.	.	.	.	.	.	.	.	82.51;82.51	.	.	99.88;99.88	.	.	.	.	.	.	.	.	.
GCA_016509015.1_PDT000441503.1	11	.	.	.	.	.	.	.	.	.	.	100.00;100.00	.	.	.	.	.	.	.	.	.	.	.	.	.	.	.	.	.	.	.	.	.	.	.	.	82.51;82.51	.	.	99.88;99.88	.	.	.	.	.	.	.	.	.
GCA_016509035.1_PDT000441502.1	11	.	.	.	.	.	.	.	.	.	.	100.00;100.00	.	.	.	.	.	.	.	.	.	.	.	.	.	.	.	.	.	.	.	.	.	.	.	.	82.51;82.51	.	.	99.88;99.88	.	.	.	.	.	.	.	.	.
GCA_016509055.1_PDT000441498.1	11	.	.	.	.	.	.	.	.	.	.	100.00;100.00	.	.	.	.	.	.	.	.	.	.	.	.	.	.	.	.	.	.	.	.	.	.	.	.	82.51;82.51	.	.	99.88;99.88	.	.	.	.	.	.	.	.	.
GCA_016509075.1_PDT000441492.1	11	.	.	.	.	.	.	.	.	.	.	100.00;100.00	.	.	.	.	.	.	.	.	.	.	.	.	.	.	.	.	.	.	.	.	.	.	.	.	82.51;82.51	.	.	99.88;99.88	.	.	.	.	.	.	.	.	.
GCA_016509095.1_PDT000441494.1	11	.	.	.	.	.	.	.	.	.	.	100.00;100.00	.	.	.	.	.	.	.	.	.	.	.	.	.	.	.	.	.	.	.	.	.	.	.	.	82.51;82.51	.	.	99.88;99.88	.	.	.	.	.	.	.	.	.
GCA_016509115.1_PDT000441495.1	11	.	.	.	.	.	.	.	.	.	.	100.00;100.00	.	.	.	.	.	.	.	.	.	.	.	.	.	.	.	.	.	.	.	.	.	.	.	.	82.51;82.51	.	.	99.88;99.88	.	.	.	.	.	.	.	.	.
GCA_016509135.1_PDT000441496.1	11	.	.	.	.	.	.	.	.	.	.	100.00;100.00	.	.	.	.	.	.	.	.	.	.	.	.	.	.	.	.	.	.	.	.	.	.	.	.	82.51;82.51	.	.	99.88;99.88	.	.	.	.	.	.	.	.	.
GCA_016509155.1_PDT000441493.1	11	.	.	.	.	.	.	.	.	.	.	100.00;100.00	.	.	.	.	.	.	.	.	.	.	.	.	.	.	.	.	.	.	.	.	.	.	.	.	82.51;82.51	.	.	99.88;99.88	.	.	.	.	.	.	.	.	.
GCA_016509175.1_PDT000441497.1	11	.	.	.	.	.	.	.	.	.	.	100.00;100.00	.	.	.	.	.	.	.	.	.	.	.	.	.	.	.	.	.	.	.	.	.	.	.	.	82.51;82.51	.	.	99.88;99.88;73.01	.	.	.	.	.	.	.	.	.
GCA_016509195.1_PDT000441491.1	11	.	.	.	.	.	.	.	.	.	.	100.00;100.00	.	.	.	.	.	.	.	.	.	.	.	.	.	.	.	.	.	.	.	.	.	.	.	.	82.51;82.51	.	.	99.88;99.88	.	.	.	.	.	.	.	.	.
GCA_016509235.1_PDT000441534.1	11	.	.	.	.	.	.	.	.	.	.	100.00;100.00	.	.	.	.	.	.	.	.	.	.	.	.	.	.	.	.	.	.	.	.	.	.	.	.	82.51;82.51	.	.	99.88;99.88	.	.	.	.	.	.	.	.	.
GCA_016509255.1_PDT000441535.1	3	.	.	.	.	.	.	.	.	.	.	.	.	.	.	.	.	.	.	.	.	.	.	.	.	.	.	.	.	.	.	.	.	.	.	.	.	.	.	.	.	.	.	.	.	.	.	.	.
GCA_016509275.1_PDT000441532.1	3	.	.	.	.	.	.	.	.	.	.	.	.	.	.	.	.	.	.	.	.	.	.	.	.	.	.	.	.	.	.	.	.	.	.	.	.	.	.	.	.	.	.	.	.	.	.	.	.
GCA_016509295.1_PDT000441490.1	3	.	.	.	.	.	.	.	.	.	.	.	.	.	.	.	.	.	.	.	.	.	.	.	.	.	.	.	.	.	.	.	.	.	.	.	.	.	.	.	.	.	.	.	.	.	.	.	.
GCA_016509315.1_PDT000441533.1	3	.	.	.	.	.	.	.	.	.	.	.	.	.	.	.	.	.	.	.	.	.	.	.	.	.	.	.	.	.	.	.	.	.	.	.	.	.	.	.	.	.	.	.	.	.	.	.	.
GCA_016509335.1_PDT000441487.1	11	.	.	.	.	.	.	.	.	.	.	100.00;100.00	.	.	.	.	.	.	.	.	.	.	.	.	.	.	.	.	.	.	.	.	.	.	.	.	82.51;82.51	.	.	99.88;99.88	.	.	.	.	.	.	.	.	.
GCA_016509355.1_PDT000441488.1	11	.	.	.	.	.	.	.	.	.	.	100.00;100.00	.	.	.	.	.	.	.	.	.	.	.	.	.	.	.	.	.	.	.	.	.	.	.	.	82.51;82.51	.	.	99.88;99.88	.	.	.	.	.	.	.	.	.
GCA_016509375.1_PDT000441489.1	11	.	.	.	.	.	.	.	.	.	.	100.00;100.00	.	.	.	.	.	.	.	.	.	.	.	.	.	.	.	.	.	.	.	.	.	.	.	.	82.51;82.51	.	.	99.88;99.88	.	.	.	.	.	.	.	.	.
GCA_016509395.1_PDT000441529.1	3	.	.	.	.	.	.	.	.	.	.	.	.	.	.	.	.	.	.	.	.	.	.	.	.	.	.	.	.	.	.	.	.	.	.	.	.	.	.	.	.	.	.	.	.	.	.	.	.
GCA_016509415.1_PDT000441530.1	3	.	.	.	.	.	.	.	.	.	.	.	.	.	.	.	.	.	.	.	.	.	.	.	.	.	.	.	.	.	.	.	.	.	.	.	.	.	.	.	.	.	.	.	.	.	.	.	.
GCA_016509435.1_PDT000441528.1	3	.	.	.	.	.	.	.	.	.	.	.	.	.	.	.	.	.	.	.	.	.	.	.	.	.	.	.	.	.	.	.	.	.	.	.	.	.	.	.	.	.	.	.	.	.	.	.	.
GCA_016509455.1_PDT000441527.1	3	.	.	.	.	.	.	.	.	.	.	.	.	.	.	.	.	.	.	.	.	.	.	.	.	.	.	.	.	.	.	.	.	.	.	.	.	.	.	.	.	.	.	.	.	.	.	.	.
GCA_016509495.1_PDT000441476.1	11	.	.	.	.	.	.	.	.	.	.	100.00;100.00	.	.	.	.	.	.	.	.	.	.	.	.	.	.	.	.	.	.	.	.	.	.	.	.	82.51;82.51	.	.	99.88;99.88	.	.	.	.	.	.	.	.	.
GCA_016509515.1_PDT000441477.1	11	.	.	.	.	.	.	.	.	.	.	100.00;100.00	.	.	.	.	.	.	.	.	.	.	.	.	.	.	.	.	.	.	.	.	.	.	.	.	82.51;82.51	.	.	99.88;99.88	.	.	.	.	.	.	.	.	.
GCA_016509535.1_PDT000441480.1	3	.	.	.	.	.	.	.	.	.	.	.	.	.	.	.	.	.	.	.	.	.	.	.	.	.	.	.	.	.	.	.	.	.	.	.	.	.	.	.	.	.	.	.	.	.	.	.	.
GCA_016509555.1_PDT000441478.1	11	.	.	.	.	.	.	.	.	.	.	100.00;100.00	.	.	.	.	.	.	.	.	.	.	.	.	.	.	.	.	.	.	.	.	.	.	.	.	82.51;82.51	.	.	99.88;99.88	.	.	.	.	.	.	.	.	.
GCA_016509575.1_PDT000441479.1	3	.	.	.	.	.	.	.	.	.	.	.	.	.	.	.	.	.	.	.	.	.	.	.	.	.	.	.	.	.	.	.	.	.	.	.	.	.	.	.	.	.	.	.	.	.	.	.	.
GCA_016509595.1_PDT000441514.1	3	.	.	.	.	.	.	.	.	.	.	.	.	.	.	.	.	.	.	.	.	.	.	.	.	.	.	.	.	.	.	.	.	.	.	.	.	.	.	.	.	.	.	.	.	.	.	.	.
GCA_016509605.1_PDT000441484.1	11	.	.	.	.	.	.	.	.	.	.	100.00;100.00	.	.	.	.	.	.	.	.	.	.	.	.	.	.	.	.	.	.	.	.	.	.	.	.	82.51;82.51	.	.	99.88;99.88	.	.	.	.	.	.	.	.	.
GCA_016509635.1_PDT000441486.1	11	.	.	.	.	.	.	.	.	.	.	100.00;100.00	.	.	.	.	.	.	.	.	.	.	.	.	.	.	.	.	.	.	.	.	.	.	.	.	82.51;82.51	.	.	99.88;99.88	.	.	.	.	.	.	.	.	.
GCA_016509655.1_PDT000441483.1	11	.	.	.	.	.	.	.	.	.	.	100.00;100.00	.	.	.	.	.	.	.	.	.	.	.	.	.	.	.	.	.	.	.	.	.	.	.	.	82.51;82.51	.	.	99.88;99.88	.	.	.	.	.	.	.	.	.
GCA_016509675.1_PDT000441485.1	11	.	.	.	.	.	.	.	.	.	.	100.00;100.00	.	.	.	.	.	.	.	.	.	.	.	.	.	.	.	.	.	.	.	.	.	.	.	.	82.51;82.51	.	.	99.88;99.88	.	.	.	.	.	.	.	.	.
GCA_016509695.1_PDT000441481.1	11	.	.	.	.	.	.	.	.	.	.	100.00;100.00	.	.	.	.	.	.	.	.	.	.	.	.	.	.	.	.	.	.	.	.	.	.	.	.	82.51;82.51	.	.	99.88;99.88	.	.	.	.	.	.	.	.	.
GCA_016509715.1_PDT000441482.1	11	.	.	.	.	.	.	.	.	.	.	100.00;100.00	.	.	.	.	.	.	.	.	.	.	.	.	.	.	.	.	.	.	.	.	.	.	.	.	82.51;82.51	.	.	99.88;99.88	.	.	.	.	.	.	.	.	.
GCA_016509775.1_PDT000441469.1	4	.	.	.	.	.	.	.	.	.	.	.	.	.	.	.	.	.	.	.	.	.	.	.	.	.	.	.	.	.	.	.	.	.	.	.	.	.	.	.	.	.	.	.	.	.	.	.	.
GCA_016509785.1_PDT000441468.1	4	.	.	.	.	.	.	.	.	.	.	.	.	.	.	.	.	.	.	.	.	.	.	.	.	.	.	.	.	.	.	.	.	.	.	.	.	.	.	.	.	.	.	.	.	.	.	.	.
GCA_016509835.1_PDT000441467.1	3	.	.	.	.	.	.	.	.	.	.	.	.	.	.	.	.	.	.	.	.	.	.	.	.	.	.	.	.	.	.	.	.	.	.	.	.	.	.	.	.	.	.	.	.	.	.	.	.
GCA_016509855.1_PDT000441471.1	3	.	.	.	.	.	.	.	.	.	.	.	.	.	.	.	.	.	.	.	.	.	.	.	.	.	.	.	.	.	.	.	.	.	.	.	.	.	.	.	.	.	.	.	.	.	.	.	.
GCA_016509875.1_PDT000441472.1	4	.	.	.	.	.	.	.	.	.	.	.	.	.	.	.	.	.	.	.	.	.	.	.	.	.	.	.	.	.	.	.	.	.	.	.	.	.	.	.	.	.	.	.	.	.	.	.	.
GCA_016509895.1_PDT000441466.1	3	.	.	.	.	.	.	.	.	.	.	.	.	.	.	.	.	.	.	.	.	.	.	.	.	.	.	.	.	.	.	.	.	.	.	.	.	.	.	.	.	.	.	.	.	.	.	.	.
GCA_016509915.1_PDT000441465.1	3	.	.	.	.	.	.	.	.	.	.	.	.	.	.	.	.	.	.	.	.	.	.	.	.	.	.	.	.	.	.	.	.	.	.	.	.	.	.	.	.	.	.	.	.	.	.	.	.
GCA_016509935.1_PDT000441462.1	3	.	.	.	.	.	.	.	.	.	.	.	.	.	.	.	.	.	.	.	.	.	.	.	.	.	.	.	.	.	.	.	.	.	.	.	.	.	.	.	.	.	.	.	.	.	.	.	.
GCA_016509955.1_PDT000441458.1	17	.	90.24;90.24	.	.	.	.	.	.	.	100.00;100.00	.	.	.	.	.	.	.	.	.	.	.	.	.	.	.	.	.	.	.	.	100.00;100.00	.	.	.	.	82.51;82.51	.	.	.	.	.	.	.	.	.	.	.	.
GCA_016509975.1_PDT000441464.1	3	.	.	.	.	.	.	.	.	.	.	.	.	.	.	.	.	.	.	.	.	.	.	.	.	.	.	.	.	.	.	.	.	.	.	.	.	.	.	.	.	.	.	.	.	.	.	.	.
GCA_016509995.1_PDT000441463.1	3	.	.	.	.	.	.	.	.	.	.	.	.	.	.	.	.	.	.	.	.	.	.	.	.	.	.	.	.	.	.	.	.	.	.	.	.	.	.	.	.	.	.	.	.	.	.	.	.
GCA_016510015.1_PDT000431575.1	3	.	.	.	.	.	.	.	.	.	.	.	.	.	.	.	.	.	.	.	.	.	.	.	.	.	.	.	.	.	.	.	.	.	.	.	.	.	.	.	.	.	.	.	.	.	.	.	.
GCA_016510035.1_PDT000431573.1	3	.	.	.	.	.	.	.	.	.	.	.	.	.	.	.	.	.	.	.	.	.	.	.	.	.	.	.	.	.	.	.	.	.	.	.	.	.	.	.	.	.	.	.	.	.	.	.	.
GCA_016510055.1_PDT000431550.1	3	.	.	.	.	.	.	.	.	.	.	.	.	.	.	.	.	.	.	.	.	.	.	.	.	.	.	.	.	.	.	.	.	.	.	.	.	.	.	.	.	.	.	.	.	.	.	.	.
GCA_016510075.1_PDT000431555.1	5	.	.	.	.	.	.	.	.	.	.	.	.	.	.	.	.	.	.	.	.	.	.	.	.	.	.	.	.	.	.	.	.	.	.	.	.	.	.	.	.	.	.	.	.	.	.	.	.
GCA_016510095.1_PDT000431570.1	3	.	.	.	.	.	.	.	.	.	.	.	.	.	.	.	.	.	.	.	.	.	.	.	.	.	.	.	.	.	.	.	.	.	.	.	.	.	.	.	.	.	.	.	.	.	.	.	.
GCA_016510115.1_PDT000431569.1	3	.	.	.	.	.	.	.	.	.	.	.	.	.	.	.	.	.	.	.	.	.	.	.	.	.	.	.	.	.	.	.	.	.	.	.	.	.	.	.	.	.	.	.	.	.	.	.	.
GCA_016510135.1_PDT000431567.1	3	.	.	.	.	.	.	.	.	.	.	.	.	.	.	.	.	.	.	.	.	.	.	.	.	.	.	.	.	.	.	.	.	.	.	.	.	.	.	.	.	.	.	.	.	.	.	.	.
GCA_016510155.1_PDT000431562.1	6	.	.	.	.	.	.	.	.	.	.	.	.	.	.	.	.	.	.	.	.	.	.	.	.	.	.	.	.	.	.	.	.	.	.	.	.	.	.	99.88;99.88	.	.	.	.	.	.	.	.	.
GCA_016510165.1_PDT000431564.1	6	.	.	.	.	.	.	.	.	.	.	.	.	.	.	.	.	.	.	.	.	.	.	.	.	.	.	.	.	.	.	.	.	.	.	.	.	.	.	99.88;99.88	.	.	.	.	.	.	.	.	.
GCA_016510195.1_PDT000431558.1	3	.	.	.	.	.	.	.	.	.	.	.	.	.	.	.	.	.	.	.	.	.	.	.	.	.	.	.	.	.	.	.	.	.	.	.	.	.	.	.	.	.	.	.	.	.	.	.	.
GCA_016510215.1_PDT000431553.1	3	.	.	.	.	.	.	.	.	.	.	.	.	.	.	.	.	.	.	.	.	.	.	.	.	.	.	.	.	.	.	.	.	.	.	.	.	.	.	.	.	.	.	.	.	.	.	.	.
GCA_016510235.1_PDT000431552.1	3	.	.	.	.	.	.	.	.	.	.	.	.	.	.	.	.	.	.	.	.	.	.	.	.	.	.	.	.	.	.	.	.	.	.	.	.	.	.	.	.	.	.	.	.	.	.	.	.
GCA_016510255.1_PDT000431551.1	4	.	.	.	.	.	.	.	.	.	.	.	.	.	.	.	.	.	.	.	.	.	.	.	.	.	.	.	.	.	.	.	.	.	.	.	.	.	.	.	.	.	.	.	.	.	.	.	.
GCA_016510275.1_PDT000431549.1	3	.	.	.	.	.	.	.	.	.	.	.	.	.	.	.	.	.	.	.	.	.	.	.	.	.	.	.	.	.	.	.	.	.	.	.	.	.	.	.	.	.	.	.	.	.	.	.	.
GCA_016510295.1_PDT000431548.1	6	.	.	.	.	.	.	.	.	.	.	.	.	.	.	.	.	.	.	.	.	.	.	.	.	.	.	.	.	.	.	.	.	.	.	.	.	.	.	99.88;99.88	.	.	.	.	.	.	.	.	.
GCA_016510315.1_PDT000431547.1	3	.	.	.	.	.	.	.	.	.	.	.	.	.	.	.	.	.	.	.	.	.	.	.	.	.	.	.	.	.	.	.	.	.	.	.	.	.	.	.	.	.	.	.	.	.	.	.	.
GCA_016510345.1_PDT000431541.1	3	.	.	.	.	.	.	.	.	.	.	.	.	.	.	.	.	.	.	.	.	.	.	.	.	.	.	.	.	.	.	.	.	.	.	.	.	.	.	.	.	.	.	.	.	.	.	.	.
GCA_016510375.1_PDT000431544.1	5	.	.	.	.	.	.	.	.	.	.	.	.	.	.	.	.	.	.	.	.	.	.	.	.	.	.	.	.	.	.	.	.	.	.	.	.	.	.	.	.	.	.	.	.	.	.	.	.
GCA_016510395.1_PDT000431545.1	5	.	.	.	.	.	.	.	.	.	.	.	.	.	.	.	.	.	.	.	.	.	.	.	.	.	.	.	.	.	.	.	.	.	.	.	.	.	.	.	.	.	.	.	.	.	.	.	.
GCA_016510415.1_PDT000431546.1	3	.	.	.	.	.	.	.	.	.	.	.	.	.	.	.	.	.	.	.	.	.	.	.	.	.	.	.	.	.	.	.	.	.	.	.	.	.	.	.	.	.	.	.	.	.	.	.	.
GCA_016510425.1_PDT000431542.1	3	.	.	.	.	.	.	.	.	.	.	.	.	.	.	.	.	.	.	.	.	.	.	.	.	.	.	.	.	.	.	.	.	.	.	.	.	.	.	.	.	.	.	.	.	.	.	.	.
GCA_016510455.1_PDT000431540.1	6	.	.	.	.	.	.	.	.	.	.	.	.	.	.	.	.	.	.	.	.	.	.	.	.	.	.	.	.	.	.	.	.	.	.	.	.	.	.	.	.	.	.	.	.	.	.	.	.
GCA_016510475.1_PDT000431538.1	3	.	.	.	.	.	.	.	.	.	.	.	.	.	.	.	.	.	.	.	.	.	.	.	.	.	.	.	.	.	.	.	.	.	.	.	.	.	.	.	.	.	.	.	.	.	.	.	.
GCA_016510495.1_PDT000431539.1	3	.	.	.	.	.	.	.	.	.	.	.	.	.	.	.	.	.	.	.	.	.	.	.	.	.	.	.	.	.	.	.	.	.	.	.	.	.	.	.	.	.	.	.	.	.	.	.	.
GCA_016510515.1_PDT000431537.1	2	.	.	.	.	.	.	.	.	.	.	.	.	.	.	.	.	.	.	.	.	.	.	.	.	.	.	.	.	.	.	.	.	.	.	.	.	.	.	.	.	.	.	.	.	.	.	.	.
GCA_016510535.1_PDT000441455.1	12	.	.	.	.	.	.	.	.	.	.	.	.	.	.	.	.	.	.	.	.	.	.	.	.	.	.	.	.	.	.	.	.	.	.	.	82.51;82.51	.	.	.	.	.	.	.	.	.	.	.	100.00;100.00
GCA_016510555.1_PDT000431535.1	3	.	.	.	.	.	.	.	.	.	.	.	.	.	.	.	.	.	.	.	.	.	.	.	.	.	.	.	.	.	.	.	.	.	.	.	.	.	.	.	.	.	.	.	.	.	.	.	.
GCA_016510575.1_PDT000431536.1	3	.	.	.	.	.	.	.	.	.	.	.	.	.	.	.	.	.	.	.	.	.	.	.	.	.	.	.	.	.	.	.	.	.	.	.	.	.	.	.	.	.	.	.	.	.	.	.	.
GCA_016510595.1_PDT000441456.1	17	.	90.24;90.24	.	.	.	.	.	.	.	100.00;100.00	.	.	.	.	.	.	.	.	.	.	.	.	.	.	.	.	.	.	.	.	100.00;100.00	.	.	.	.	82.51;82.51	.	.	.	.	.	.	.	.	.	.	.	.
GCA_016510635.1_PDT000431534.1	3	.	.	.	.	.	.	.	.	.	.	.	.	.	.	.	.	.	.	.	.	.	.	.	.	.	.	.	.	.	.	.	.	.	.	.	.	.	.	.	.	.	.	.	.	.	.	.	.
GCA_016510655.1_PDT000441461.1	17	.	90.24;90.24	.	.	.	.	.	.	.	100.00;100.00	.	.	.	.	.	.	.	.	.	.	.	.	.	.	.	.	.	.	.	.	100.00;100.00	.	.	.	.	82.51;82.51	.	.	.	.	.	.	.	.	.	.	.	.
GCA_016510675.1_PDT000441470.1	4	.	.	.	.	.	.	.	.	.	.	.	.	.	.	.	.	.	.	.	.	.	.	.	.	.	.	.	.	.	.	.	.	.	.	.	.	.	.	.	.	.	.	.	.	.	.	.	.
GCA_016510695.1_PDT000441459.1	17	.	90.24;90.24	.	.	.	.	.	.	.	100.00;100.00	.	.	.	.	.	.	.	.	.	.	.	.	.	.	.	.	.	.	.	.	100.00;100.00	.	.	.	.	82.51;82.51	.	.	.	.	.	.	.	.	.	.	.	.
GCA_016510715.1_PDT000441457.1	17	.	90.24;90.24	.	.	.	.	.	.	.	100.00;100.00	.	.	.	.	.	.	.	.	.	.	.	.	.	.	.	.	.	.	.	.	100.00;100.00	.	.	.	.	82.51;82.51	.	.	.	.	.	.	.	.	.	.	.	.
GCA_016510735.1_PDT000441460.1	17	.	90.24;90.24	.	.	.	.	.	.	.	100.00;100.00	.	.	.	.	.	.	.	.	.	.	.	.	.	.	.	.	.	.	.	.	100.00;100.00	.	.	.	.	82.51;82.51	.	.	.	.	.	.	.	.	.	.	.	.
GCA_016510755.1_PDT000441454.1	12	.	.	.	.	.	.	.	.	.	.	.	.	.	.	.	.	.	.	.	.	.	.	.	.	.	.	.	.	.	.	.	.	.	.	.	82.51;82.51	.	.	.	.	.	.	.	.	.	.	.	100.00;100.00
GCA_016510775.1_PDT000431577.1	3	.	.	.	.	.	.	.	.	.	.	.	.	.	.	.	.	.	.	.	.	.	.	.	.	.	.	.	.	.	.	.	.	.	.	.	.	.	.	.	.	.	.	.	.	.	.	.	.
GCA_016510795.1_PDT000441448.1	11	.	.	.	.	.	.	.	.	.	.	100.00;100.00	.	.	.	.	.	.	.	.	.	.	.	.	.	.	.	.	.	.	.	.	.	.	.	.	82.51;82.51	.	.	99.88;99.88	.	.	.	.	.	.	.	.	.
GCA_016510815.1_PDT000441449.1	11	.	.	.	.	.	.	.	.	.	.	100.00;100.00	.	.	.	.	.	.	.	.	.	.	.	.	.	.	.	.	.	.	.	.	.	.	.	.	82.51;82.51	.	.	99.88;99.88	.	.	.	.	.	.	.	.	.
GCA_016510835.1_PDT000431571.1	3	.	.	.	.	.	.	.	.	.	.	.	.	.	.	.	.	.	.	.	.	.	.	.	.	.	.	.	.	.	.	.	.	.	.	.	.	.	.	.	.	.	.	.	.	.	.	.	.
GCA_016510855.1_PDT000431572.1	3	.	.	.	.	.	.	.	.	.	.	.	.	.	.	.	.	.	.	.	.	.	.	.	.	.	.	.	.	.	.	.	.	.	.	.	.	.	.	.	.	.	.	.	.	.	.	.	.
GCA_016510875.1_PDT000441453.1	12	.	.	.	.	.	.	.	.	.	.	.	.	.	.	.	.	.	.	.	.	.	.	.	.	.	.	.	.	.	.	.	.	.	.	.	82.51;82.51	.	.	.	.	.	.	.	.	.	.	.	100.00;100.00
GCA_016510895.1_PDT000441452.1	12	.	.	.	.	.	.	.	.	.	.	.	.	.	.	.	.	.	.	.	.	.	.	.	.	.	.	.	.	.	.	.	.	.	.	.	82.51;82.51	.	.	.	.	.	.	.	.	.	.	.	100.00;100.00
GCA_016510915.1_PDT000441451.1	11	.	.	.	.	.	.	.	.	.	.	100.00;100.00	.	.	.	.	.	.	.	.	.	.	.	.	.	.	.	.	.	.	.	.	.	.	.	.	82.51;82.51	.	.	99.88;99.88	.	.	.	.	.	.	.	.	.
GCA_016510935.1_PDT000441450.1	12	.	.	.	.	.	.	.	.	.	.	.	.	.	.	.	.	.	.	.	.	.	.	.	.	.	.	.	.	.	.	.	.	.	.	.	82.51;82.51	.	.	.	.	.	.	.	.	.	.	.	100.00;100.00
GCA_016510955.1_PDT000431576.1	3	.	.	.	.	.	.	.	.	.	.	.	.	.	.	.	.	.	.	.	.	.	.	.	.	.	.	.	.	.	.	.	.	.	.	.	.	.	.	.	.	.	.	.	.	.	.	.	.
GCA_016510975.1_PDT000431574.1	3	.	.	.	.	.	.	.	.	.	.	.	.	.	.	.	.	.	.	.	.	.	.	.	.	.	.	.	.	.	.	.	.	.	.	.	.	.	.	.	.	.	.	.	.	.	.	.	.
GCA_016510995.1_PDT000431568.1	3	.	.	.	.	.	.	.	.	.	.	.	.	.	.	.	.	.	.	.	.	.	.	.	.	.	.	.	.	.	.	.	.	.	.	.	.	.	.	.	.	.	.	.	.	.	.	.	.
GCA_016511015.1_PDT000431566.1	3	.	.	.	.	.	.	.	.	.	.	.	.	.	.	.	.	.	.	.	.	.	.	.	.	.	.	.	.	.	.	.	.	.	.	.	.	.	.	.	.	.	.	.	.	.	.	.	.
GCA_016511035.1_PDT000431563.1	3	.	.	.	.	.	.	.	.	.	.	.	.	.	.	.	.	.	.	.	.	.	.	.	.	.	.	.	.	.	.	.	.	.	.	.	.	.	.	.	.	.	.	.	.	.	.	.	.
GCA_016511055.1_PDT000431565.1	3	.	.	.	.	.	.	.	.	.	.	.	.	.	.	.	.	.	.	.	.	.	.	.	.	.	.	.	.	.	.	.	.	.	.	.	.	.	.	.	.	.	.	.	.	.	.	.	.
GCA_016511075.1_PDT000431560.1	3	.	.	.	.	.	.	.	.	.	.	.	.	.	.	.	.	.	.	.	.	.	.	.	.	.	.	.	.	.	.	.	.	.	.	.	.	.	.	.	.	.	.	.	.	.	.	.	.
GCA_016511095.1_PDT000431561.1	3	.	.	.	.	.	.	.	.	.	.	.	.	.	.	.	.	.	.	.	.	.	.	.	.	.	.	.	.	.	.	.	.	.	.	.	.	.	.	.	.	.	.	.	.	.	.	.	.
GCA_016511115.1_PDT000431559.1	3	.	.	.	.	.	.	.	.	.	.	.	.	.	.	.	.	.	.	.	.	.	.	.	.	.	.	.	.	.	.	.	.	.	.	.	.	.	.	.	.	.	.	.	.	.	.	.	.
GCA_016511135.1_PDT000431557.1	5	.	.	.	.	.	.	.	.	.	.	.	.	.	.	.	.	.	.	.	.	.	.	.	.	.	.	.	.	.	.	.	.	.	.	.	.	.	.	.	.	.	.	.	.	.	.	.	.
GCA_016511155.1_PDT000431543.1	4	.	.	.	.	.	.	.	.	.	.	.	.	.	.	.	.	.	.	.	.	.	.	.	.	.	.	.	.	.	.	.	.	.	.	.	.	.	.	.	.	.	.	.	.	.	.	.	.
GCA_016511175.1_PDT000431556.1	3	.	.	.	.	.	.	.	.	.	.	.	.	.	.	.	.	.	.	.	.	.	.	.	.	.	.	.	.	.	.	.	.	.	.	.	.	.	.	.	.	.	.	.	.	.	.	.	.
GCA_016511195.1_PDT000431554.1	3	.	.	.	.	.	.	.	.	.	.	.	.	.	.	.	.	.	.	.	.	.	.	.	.	.	.	.	.	.	.	.	.	.	.	.	.	.	.	.	.	.	.	.	.	.	.	.	.
GCA_016511215.1_PDT000431531.1	3	.	.	.	.	.	.	.	.	.	.	.	.	.	.	.	.	.	.	.	.	.	.	.	.	.	.	.	.	.	.	.	.	.	.	.	.	.	.	.	.	.	.	.	.	.	.	.	.
GCA_016511235.1_PDT000431532.1	3	.	.	.	.	.	.	.	.	.	.	.	.	.	.	.	.	.	.	.	.	.	.	.	.	.	.	.	.	.	.	.	.	.	.	.	.	.	.	.	.	.	.	.	.	.	.	.	.
GCA_016511255.1_PDT000431533.1	5	.	.	.	.	.	.	.	.	.	.	.	.	.	.	.	.	.	.	.	.	.	.	.	.	.	.	.	.	.	.	.	.	.	.	.	.	.	.	.	.	.	.	.	.	.	.	.	.
GCA_016511275.1_PDT000431528.1	3	.	.	.	.	.	.	.	.	.	.	.	.	.	.	.	.	.	.	.	.	.	.	.	.	.	.	.	.	.	.	.	.	.	.	.	.	.	.	.	.	.	.	.	.	.	.	.	.
GCA_016511295.1_PDT000431530.1	3	.	.	.	.	.	.	.	.	.	.	.	.	.	.	.	.	.	.	.	.	.	.	.	.	.	.	.	.	.	.	.	.	.	.	.	.	.	.	.	.	.	.	.	.	.	.	.	.
GCA_016511315.1_PDT000431529.1	3	.	.	.	.	.	.	.	.	.	.	.	.	.	.	.	.	.	.	.	.	.	.	.	.	.	.	.	.	.	.	.	.	.	.	.	.	.	.	.	.	.	.	.	.	.	.	.	.
GCA_016511335.1_PDT000431527.1	3	.	.	.	.	.	.	.	.	.	.	.	.	.	.	.	.	.	.	.	.	.	.	.	.	.	.	.	.	.	.	.	.	.	.	.	.	.	.	.	.	.	.	.	.	.	.	.	.
GCA_016511355.1_PDT000431526.1	6	.	.	.	.	.	.	.	.	.	.	.	.	.	.	.	.	.	.	.	.	.	.	.	.	.	.	.	.	.	.	.	.	.	.	.	.	.	.	99.88;99.88	.	.	.	.	.	.	.	.	.
GCA_016511375.1_PDT000431525.1	3	.	.	.	.	.	.	.	.	.	.	.	.	.	.	.	.	.	.	.	.	.	.	.	.	.	.	.	.	.	.	.	.	.	.	.	.	.	.	.	.	.	.	.	.	.	.	.	.
GCA_016511395.1_PDT000431524.1	3	.	.	.	.	.	.	.	.	.	.	.	.	.	.	.	.	.	.	.	.	.	.	.	.	.	.	.	.	.	.	.	.	.	.	.	.	.	.	.	.	.	.	.	.	.	.	.	.
GCA_016511415.1_PDT000431522.1	3	.	.	.	.	.	.	.	.	.	.	.	.	.	.	.	.	.	.	.	.	.	.	.	.	.	.	.	.	.	.	.	.	.	.	.	.	.	.	.	.	.	.	.	.	.	.	.	.
GCA_016511425.1_PDT000431523.1	3	.	.	.	.	.	.	.	.	.	.	.	.	.	.	.	.	.	.	.	.	.	.	.	.	.	.	.	.	.	.	.	.	.	.	.	.	.	.	.	.	.	.	.	.	.	.	.	.
GCA_016511455.1_PDT000431521.1	3	.	.	.	.	.	.	.	.	.	.	.	.	.	.	.	.	.	.	.	.	.	.	.	.	.	.	.	.	.	.	.	.	.	.	.	.	.	.	.	.	.	.	.	.	.	.	.	.
GCA_016511475.1_PDT000431520.1	3	.	.	.	.	.	.	.	.	.	.	.	.	.	.	.	.	.	.	.	.	.	.	.	.	.	.	.	.	.	.	.	.	.	.	.	.	.	.	.	.	.	.	.	.	.	.	.	.
GCA_016511495.1_PDT000431519.1	3	.	.	.	.	.	.	.	.	.	.	.	.	.	.	.	.	.	.	.	.	.	.	.	.	.	.	.	.	.	.	.	.	.	.	.	.	.	.	.	.	.	.	.	.	.	.	.	.
GCA_016511515.1_PDT000431517.1	5	.	.	.	.	.	.	.	.	.	.	.	.	.	.	.	.	.	.	.	.	.	.	.	.	.	.	.	.	.	.	.	.	.	.	.	.	.	.	.	.	.	.	.	.	.	.	.	.
GCA_016511535.1_PDT000431518.1	3	.	.	.	.	.	.	.	.	.	.	.	.	.	.	.	.	.	.	.	.	.	.	.	.	.	.	.	.	.	.	.	.	.	.	.	.	.	.	.	.	.	.	.	.	.	.	.	.
GCA_016511555.1_PDT000424141.1	10	.	.	.	.	.	.	.	.	.	.	.	.	.	.	.	.	.	.	.	.	.	.	.	.	.	.	.	.	.	.	.	.	.	.	.	.	.	.	99.88;99.88	.	.	.	.	.	.	.	.	.
GCA_016511575.1_PDT000424142.1	10	.	.	.	.	.	.	.	.	.	.	.	.	.	.	.	.	.	.	.	.	.	.	.	.	.	.	.	.	.	.	.	.	.	.	.	.	.	.	99.88;99.88	.	.	.	.	.	.	.	.	.
GCA_016511595.1_PDT000431516.1	3	.	.	.	.	.	.	.	.	.	.	.	.	.	.	.	.	.	.	.	.	.	.	.	.	.	.	.	.	.	.	.	.	.	.	.	.	.	.	.	.	.	.	.	.	.	.	.	.
GCA_016511615.1_PDT000431514.1	3	.	.	.	.	.	.	.	.	.	.	.	.	.	.	.	.	.	.	.	.	.	.	.	.	.	.	.	.	.	.	.	.	.	.	.	.	.	.	.	.	.	.	.	.	.	.	.	.
GCA_016511635.1_PDT000431515.1	4	.	.	.	.	.	.	.	.	.	.	.	.	.	.	.	.	.	.	.	.	.	.	.	.	.	.	.	.	.	.	.	.	.	.	.	.	.	.	.	.	.	.	.	.	.	.	.	.
GCA_016511655.1_PDT000431512.1	3	.	.	.	.	.	.	.	.	.	.	.	.	.	.	.	.	.	.	.	.	.	.	.	.	.	.	.	.	.	.	.	.	.	.	.	.	.	.	.	.	.	.	.	.	.	.	.	.
GCA_016511675.1_PDT000431513.1	5	.	.	.	.	.	.	.	.	.	.	.	.	.	.	.	.	.	.	.	.	.	.	.	.	.	.	.	.	.	.	.	.	.	.	.	.	.	.	.	.	.	.	.	.	.	.	.	.
GCA_016511695.1_PDT000431511.1	6	.	.	.	.	.	.	.	.	.	.	.	.	.	.	.	.	.	.	.	.	.	.	.	.	.	.	.	.	.	.	.	.	.	.	.	.	.	.	99.88;99.88	.	.	.	.	.	.	.	.	.
GCA_016511715.1_PDT000424143.1	10	.	.	.	.	.	.	.	.	.	.	.	.	.	.	.	.	.	.	.	.	.	.	.	.	.	.	.	.	.	.	.	.	.	.	.	.	.	.	99.88;99.88	.	.	.	.	.	.	.	.	.
GCA_016511735.1_PDT000424137.1	12	.	.	.	.	.	.	.	.	.	.	.	.	.	.	.	.	.	.	.	.	.	.	.	.	.	.	.	.	.	.	.	.	.	.	.	.	.	.	99.88;99.88	.	.	.	.	.	.	.	.	100.00;100.00
GCA_016511755.1_PDT000424136.1	12	.	.	.	.	.	.	.	.	.	.	.	.	.	.	.	.	.	.	.	.	.	.	.	.	.	.	.	.	.	.	.	.	.	.	.	.	.	.	99.88;99.88	.	.	.	.	.	.	.	.	100.00;100.00
GCA_016511775.1_PDT000424140.1	3	.	.	.	.	.	.	.	.	.	.	.	.	.	.	.	.	.	.	.	.	.	.	.	.	.	.	.	.	.	.	.	.	.	.	.	.	.	.	.	.	.	.	.	.	.	.	.	.
GCA_016511795.1_PDT000424133.1	10	.	.	.	.	.	.	.	.	.	.	.	.	.	.	.	.	.	.	.	.	.	.	.	.	.	.	.	.	.	.	.	.	.	.	.	.	.	.	99.88;99.88	.	.	.	.	.	.	.	.	.
GCA_016511805.1_PDT000424131.1	5	.	.	.	.	.	.	.	.	.	.	.	.	.	.	.	.	.	.	.	.	.	.	.	.	.	.	.	.	.	.	.	.	.	.	.	.	.	.	.	.	.	.	.	.	.	.	.	.
GCA_016511835.1_PDT000424135.1	12	.	.	.	.	.	.	.	.	.	.	.	.	.	.	.	.	.	.	.	.	.	.	.	.	.	.	.	.	.	.	.	.	.	.	.	.	.	.	99.88;99.88	.	.	.	.	.	.	.	.	100.00;100.00
GCA_016511855.1_PDT000424134.1	11	.	.	.	.	.	.	.	.	.	.	.	.	.	.	.	.	.	.	.	.	.	.	.	.	.	.	.	.	.	.	.	.	.	.	.	.	.	.	.	.	.	.	.	.	.	.	.	.
GCA_016511875.1_PDT000424138.1	15	.	.	.	.	.	.	.	.	.	.	100.00;89.14	.	.	.	.	.	.	.	.	.	.	.	.	.	.	.	.	.	.	.	.	.	.	.	.	82.51;82.51	.	.	.	.	.	.	.	.	.	.	.	.
GCA_016511895.1_PDT000424139.1	15	.	.	.	.	.	.	.	.	.	.	100.00;89.14	.	.	.	.	.	.	.	.	.	.	.	.	.	.	.	.	.	.	.	.	.	.	.	.	82.51;82.51	.	.	.	.	.	.	.	.	.	.	.	.
GCA_016511915.1_PDT000424132.1	5	.	.	.	.	.	.	.	.	.	.	.	.	.	.	.	.	.	.	.	.	.	.	.	.	.	.	.	.	.	.	.	.	.	.	.	.	.	.	.	.	.	.	.	.	.	.	.	.
GCA_016511935.1_PDT000424130.1	4	.	.	.	.	.	.	.	.	.	.	.	.	.	.	.	.	.	.	.	.	.	.	.	.	.	.	.	.	.	.	.	.	.	.	.	.	.	.	.	.	.	.	.	.	.	.	.	.
GCA_016511955.1_PDT000424129.1	12	.	.	.	.	.	.	.	.	.	.	.	.	.	.	.	.	.	.	.	.	.	.	.	.	.	.	.	.	.	.	.	.	.	.	.	.	.	.	99.88;99.88	.	.	.	.	.	.	.	.	100.00;100.00
GCA_016511975.1_PDT000424128.1	8	.	.	.	.	.	.	.	.	.	.	.	.	.	.	.	.	.	.	.	.	.	.	.	.	.	.	.	.	.	.	.	100.00;100.00	.	.	.	.	.	.	.	.	.	.	.	.	.	.	.	.
GCA_016511995.1_PDT000424127.1	12	.	.	.	.	.	.	.	.	.	.	.	.	.	.	.	.	.	.	.	.	.	.	.	.	.	.	.	.	.	.	.	.	.	.	.	.	.	.	99.88;99.88	.	.	.	.	.	.	.	.	100.00;100.00
GCA_016512015.1_PDT000424126.1	11	.	.	.	.	.	.	.	.	.	.	.	.	.	.	.	.	.	.	.	.	.	.	.	.	.	.	.	.	.	.	.	.	.	.	.	.	.	.	99.88;99.88	.	.	.	.	.	.	.	.	.
GCA_016512035.1_PDT000424122.1	14	.	.	.	.	.	.	.	.	.	.	100.00;89.14	.	.	.	.	.	.	.	.	.	.	.	.	.	.	.	.	.	.	.	.	.	.	.	.	82.51;82.51	.	.	.	.	.	.	.	.	.	.	.	.
GCA_016512055.1_PDT000424123.1	14	.	.	.	.	.	.	.	.	.	.	100.00;89.14	.	.	.	.	.	.	.	.	.	.	.	.	.	.	.	.	.	.	.	.	.	.	.	.	82.51;82.51	.	.	.	.	.	.	.	.	.	.	.	.
GCA_016512075.1_PDT000424125.1	14	.	.	.	.	.	.	.	.	.	.	100.00;100.00	.	.	.	.	.	.	.	.	.	.	.	.	.	.	.	.	.	.	.	.	.	.	.	.	82.51;82.51	.	.	.	.	.	.	.	.	.	.	.	.
GCA_016512095.1_PDT000424124.1	14	.	.	.	.	.	.	.	.	.	.	100.00;89.14	.	.	.	.	.	.	.	.	.	.	.	.	.	.	.	.	.	.	.	.	.	.	.	.	82.51;82.51	.	.	.	.	.	.	.	.	.	.	.	.
GCA_016512115.1_PDT000424119.1	10	.	.	.	.	.	.	.	.	.	.	.	.	.	.	.	.	.	.	.	.	.	.	.	.	.	.	.	.	.	.	.	.	.	.	.	.	.	.	99.88;99.88	.	.	.	.	.	.	.	.	.
GCA_016512135.1_PDT000424121.1	11	.	.	.	.	.	.	.	.	.	.	100.00;89.14	.	.	.	.	.	.	.	.	.	.	.	.	.	.	.	.	.	.	.	.	.	.	.	.	82.51;82.51	.	.	.	.	.	.	.	.	.	.	.	.
GCA_016512155.1_PDT000424120.1	10	.	.	.	.	.	.	.	.	.	.	.	.	.	.	.	.	.	.	.	.	.	.	.	.	.	.	.	.	.	.	.	.	.	.	.	.	.	.	99.88;99.88	.	.	.	.	.	.	.	.	.
GCA_016512175.1_PDT000424118.1	18	.	89.32;89.50	.	.	.	.	.	.	.	.	.	.	.	.	.	.	.	.	.	.	.	.	.	.	.	.	.	.	.	.	.	.	.	.	.	.	.	.	99.88;99.88	.	.	.	.	.	.	.	.	.
GCA_016512215.1_PDT000424111.1	12	.	.	.	.	.	.	.	.	.	.	.	.	.	.	.	.	.	.	.	.	.	.	.	.	.	.	.	.	.	.	.	.	.	.	.	.	.	.	99.88;99.88	.	.	.	.	.	.	.	.	100.00;100.00
GCA_016512235.1_PDT000424114.1	11	.	.	.	.	.	.	.	.	.	.	.	.	.	.	.	.	.	.	.	.	.	.	.	.	.	.	.	.	.	.	.	.	.	.	.	.	.	.	99.88;99.88	.	.	.	.	.	.	.	.	.
GCA_016512255.1_PDT000424112.1	10	.	.	.	.	.	.	.	.	.	.	.	.	.	.	.	.	.	.	.	.	.	.	.	.	.	.	.	.	.	.	.	.	.	.	.	.	.	.	99.88;99.88	.	.	.	.	.	.	.	.	.
GCA_016512275.1_PDT000424109.1	7	.	.	.	.	.	.	.	.	.	.	.	.	.	.	.	.	.	.	.	.	.	.	.	.	.	.	.	.	.	.	.	.	.	.	.	.	.	.	.	.	.	.	.	.	.	.	.	.
GCA_016512295.1_PDT000424108.1	7	.	.	.	.	.	.	.	.	.	.	.	.	.	.	.	.	.	.	.	.	.	.	.	.	.	.	.	.	.	.	.	.	.	.	.	.	.	.	.	.	.	.	.	.	.	.	.	.
GCA_016512315.1_PDT000424117.1	10	.	.	.	.	.	.	.	.	.	.	.	.	.	.	.	.	.	.	.	.	.	.	.	.	.	.	.	.	.	.	.	.	.	.	.	.	.	.	99.88;99.88	.	.	.	.	.	.	.	.	.
GCA_016512335.1_PDT000424107.1	7	.	.	.	.	.	.	.	.	.	.	.	.	.	.	.	.	.	.	.	.	.	.	.	.	.	.	.	.	.	.	.	.	.	.	.	.	.	.	.	.	.	.	.	.	.	.	.	.
GCA_016512355.1_PDT000424116.1	10	.	.	.	.	.	.	.	.	.	.	.	.	.	.	.	.	.	.	.	.	.	.	.	.	.	.	.	.	.	.	.	.	.	.	.	.	.	.	99.88;99.88	.	.	.	.	.	.	.	.	.
GCA_016512375.1_PDT000424105.1	11	.	.	.	.	.	.	.	.	.	.	.	.	.	.	.	.	.	.	.	.	.	.	.	.	.	.	.	.	.	.	.	.	.	.	.	.	.	.	99.88;99.88	.	.	.	.	.	.	.	.	.
GCA_016512395.1_PDT000424104.1	11	.	.	.	.	.	.	.	.	.	.	.	.	.	.	.	.	.	.	.	.	.	.	.	.	.	.	.	.	.	.	.	.	.	.	.	.	.	.	99.88;99.88	.	.	.	.	.	.	.	.	.
GCA_016512415.1_PDT000424103.1	11	.	.	.	.	.	.	.	.	.	.	.	.	.	.	.	.	.	.	.	.	.	.	.	.	.	.	.	.	.	.	.	.	.	.	.	.	.	.	99.88;99.88	.	.	.	.	.	.	.	.	.
GCA_016512435.1_PDT000424102.1	10	.	.	.	.	.	.	.	.	.	.	.	.	.	.	.	.	.	.	.	.	.	.	.	.	.	.	.	.	.	.	.	.	.	.	.	.	.	.	99.88;99.88	.	.	.	.	.	.	.	.	.
GCA_016512455.1_PDT000424101.1	16	.	.	.	.	.	.	.	.	.	.	.	.	.	.	.	.	.	.	.	.	.	.	.	.	.	.	.	.	.	.	.	.	.	.	.	82.51;82.51	.	.	99.88;99.88	.	.	.	.	.	.	.	.	100.00;100.00
GCA_016512475.1_PDT000424098.1	8	.	.	.	.	.	.	.	.	.	.	.	.	.	.	.	.	.	.	.	.	.	.	.	.	.	.	.	.	.	.	.	.	.	.	.	.	.	.	99.88;99.88	.	.	.	.	.	.	.	.	.
GCA_016512495.1_PDT000424099.1	5	.	.	.	.	.	.	.	.	.	.	.	.	.	.	.	.	.	.	.	.	.	.	.	.	.	.	.	.	.	.	.	.	.	.	.	.	.	.	.	.	.	.	.	.	.	.	.	.
GCA_016512515.1_PDT000424096.1	16	.	.	.	.	.	.	.	.	.	.	.	.	.	.	.	.	.	.	.	.	.	.	.	.	.	.	.	.	.	.	.	.	.	.	.	82.51;82.51	.	.	99.88;99.88	.	.	.	.	.	.	.	.	100.00;100.00
GCA_016512535.1_PDT000424097.1	16	.	.	.	.	.	.	.	.	.	.	.	.	.	.	.	.	.	.	.	.	.	.	.	.	.	.	.	.	.	.	.	.	.	.	.	82.51;82.51	.	.	99.88;99.88	.	.	.	.	.	.	.	.	100.00;100.00
GCA_016512555.1_PDT000424095.1	4	.	.	.	.	.	.	.	.	.	.	.	.	.	.	.	.	.	.	.	.	.	.	.	.	.	.	.	.	.	.	.	.	.	.	.	.	.	.	.	.	.	.	.	.	.	.	.	.
GCA_016512575.1_PDT000424093.1	17	.	.	.	.	.	.	.	.	.	.	.	.	.	.	.	.	.	.	.	.	.	.	.	.	.	.	.	.	.	.	.	.	.	.	.	82.51;82.51	.	.	99.88;99.88	.	.	.	.	.	.	.	.	100.00;100.00
GCA_016512595.1_PDT000424091.1	17	.	.	.	.	.	.	.	.	.	.	.	.	.	.	.	.	.	.	.	.	.	.	.	.	.	.	.	.	.	.	.	.	.	.	.	82.51;82.51	.	.	99.88;99.88	.	.	.	.	.	.	.	.	100.00;100.00
GCA_016512615.1_PDT000424092.1	18	.	.	.	.	.	.	.	.	.	.	.	.	.	.	.	.	.	.	.	.	.	.	.	.	.	.	.	.	.	.	.	.	.	.	.	82.51;82.51	.	.	99.88;99.88	.	.	.	.	.	.	.	.	100.00;100.00
GCA_016512635.1_PDT000424089.1	18	.	.	.	.	.	.	.	.	.	.	.	.	.	.	.	.	.	.	.	.	.	.	.	.	.	.	.	.	.	.	.	.	.	.	.	82.51;82.51	.	.	99.88;99.88	.	.	.	.	.	.	.	.	100.00;100.00
GCA_016512655.1_PDT000424090.1	18	.	.	.	.	.	.	.	.	.	.	.	.	.	.	.	.	.	.	.	.	.	.	.	.	.	.	.	.	.	.	.	.	.	.	.	82.51;82.51	.	.	99.88;99.88	.	.	.	.	.	.	.	.	100.00;100.00
GCA_016512675.1_PDT000424087.1	17	.	.	.	.	.	.	.	.	.	.	.	.	.	.	.	.	.	.	.	.	.	.	.	.	.	.	.	.	.	.	.	.	.	.	.	82.51;82.51	.	.	99.88;99.88	.	.	.	.	.	.	.	.	100.00;100.00;100.00
GCA_016512715.1_PDT000424086.1	10	.	.	.	.	.	.	.	.	.	.	.	.	.	.	.	.	.	.	.	.	.	.	.	.	.	.	.	.	.	.	.	.	.	.	.	.	.	.	99.88;99.88	.	.	.	.	.	.	.	.	.
GCA_016512735.1_PDT000424083.1	10	.	.	.	.	.	.	.	.	.	.	.	.	.	.	.	.	.	.	.	.	.	.	.	.	.	.	.	.	.	.	.	.	.	.	.	.	.	.	99.88;99.88	.	.	.	.	.	.	.	.	.
GCA_016512755.1_PDT000424084.1	10	.	.	.	.	.	.	.	.	.	.	.	.	.	.	.	.	.	.	.	.	.	.	.	.	.	.	.	.	.	.	.	.	.	.	.	.	.	.	99.88;99.88	.	.	.	.	.	.	.	.	.
GCA_016512775.1_PDT000424085.1	10	.	.	.	.	.	.	.	.	.	.	.	.	.	.	.	.	.	.	.	.	.	.	.	.	.	.	.	.	.	.	.	.	.	.	.	.	.	.	99.88;99.88	.	.	.	.	.	.	.	.	.
GCA_016512795.1_PDT000424082.1	10	.	.	.	.	.	.	.	.	.	.	.	.	.	.	.	.	.	.	.	.	.	.	.	.	.	.	.	.	.	.	.	.	.	.	.	.	.	.	99.88;99.88	.	.	.	.	.	.	.	.	.
GCA_016512815.1_PDT000424079.1	15	.	.	.	.	.	.	.	.	.	.	100.00;89.14	.	.	.	.	.	.	.	.	.	.	.	.	.	.	.	.	.	.	.	.	.	.	.	.	82.51;82.51	.	.	.	.	.	.	.	.	.	.	.	.
GCA_016512835.1_PDT000424081.1	10	.	.	.	.	.	.	.	.	.	.	.	.	.	.	.	.	.	.	.	.	.	.	.	.	.	.	.	.	.	.	.	.	.	.	.	.	.	.	99.88;99.88	.	.	.	.	.	.	.	.	.
GCA_016512855.1_PDT000424080.1	10	.	.	.	.	.	.	.	.	.	.	.	.	.	.	.	.	.	.	.	.	.	.	.	.	.	.	.	.	.	.	.	.	.	.	.	.	.	.	99.88;99.88	.	.	.	.	.	.	.	.	.
GCA_016512875.1_PDT000424078.1	10	.	.	.	.	.	.	.	.	.	.	.	.	.	.	.	.	.	.	.	.	.	.	.	.	.	.	.	.	.	.	.	.	.	.	.	.	.	.	99.88;99.88	.	.	.	.	.	.	.	.	.
GCA_016512895.1_PDT000424077.1	10	.	.	.	.	.	.	.	.	.	.	.	.	.	.	.	.	.	.	.	.	.	.	.	.	.	.	.	.	.	.	.	.	.	.	.	.	.	.	99.88;99.88	.	.	.	.	.	.	.	.	.
GCA_016512915.1_PDT000424076.1	15	.	.	.	.	.	.	.	.	.	.	100.00;89.14	.	.	.	.	.	.	.	.	.	.	.	.	.	.	.	.	.	.	.	.	.	.	.	.	82.51;82.51	.	.	.	.	.	.	.	.	.	.	.	.
GCA_016512935.1_PDT000424075.1	15	.	.	.	.	.	.	.	.	.	.	100.00;89.14	.	.	.	.	.	.	.	.	.	.	.	.	.	.	.	.	.	.	.	.	.	.	.	.	82.51;82.51	.	.	.	.	.	.	.	.	.	.	.	.
GCA_016512955.1_PDT000424074.1	15	.	.	.	.	.	.	.	.	.	.	100.00;89.14	.	.	.	.	.	.	.	.	.	.	.	.	.	.	.	.	.	.	.	.	.	.	.	.	82.51;82.51	.	.	.	.	.	.	.	.	.	.	.	.
GCA_016512975.1_PDT000424073.1	15	.	.	.	.	.	.	.	.	.	.	100.00;89.14	.	.	.	.	.	.	.	.	.	.	.	.	.	.	.	.	.	.	.	.	.	.	.	.	82.51;82.51	.	.	.	.	.	.	.	.	.	.	.	.
GCA_016512995.1_PDT000424070.1	19	.	.	.	.	.	.	.	.	.	.	89.14	.	.	.	.	.	.	.	.	.	.	.	.	.	.	.	.	.	.	.	.	.	.	.	.	82.51	.	.	99.88;99.88	.	.	.	.	.	.	.	.	.
GCA_016513015.1_PDT000424072.1	15	.	.	.	.	.	.	.	.	.	.	100.00;89.14	.	.	.	.	.	.	.	.	.	.	.	.	.	.	.	.	.	.	.	.	.	.	.	.	82.51;82.51	.	.	.	.	.	.	.	.	.	.	.	.
GCA_016513035.1_PDT000424071.1	15	.	.	.	.	.	.	.	.	.	.	100.00;89.14	.	.	.	.	.	.	.	.	.	.	.	.	.	.	.	.	.	.	.	.	.	.	.	.	82.51;82.51	.	.	.	.	.	.	.	.	.	.	.	.
GCA_016513055.1_PDT000424069.1	15	.	.	.	.	.	.	.	.	.	.	100.00;89.14	.	.	.	.	.	.	.	.	.	.	.	.	.	.	.	.	.	.	.	.	.	.	.	.	82.51;82.51	.	.	.	.	.	.	.	.	.	.	.	.
GCA_016513075.1_PDT000424067.1	15	.	.	.	.	.	.	.	.	.	.	100.00;89.14	.	.	.	.	.	.	.	.	.	.	.	.	.	.	.	.	.	.	.	.	.	.	.	.	82.51;82.51	.	.	.	.	.	.	.	.	.	.	.	.
GCA_016513095.1_PDT000424068.1	12	.	.	.	.	.	.	.	.	.	.	.	.	.	.	.	.	.	.	.	.	.	.	.	.	.	.	.	.	.	.	.	.	.	.	.	.	.	.	99.88;99.88	.	.	.	.	.	.	.	.	.
GCA_016513115.1_PDT000424066.1	15	.	.	.	.	.	.	.	.	.	.	100.00;89.14	.	.	.	.	.	.	.	.	.	.	.	.	.	.	.	.	.	.	.	.	.	.	.	.	82.51;82.51	.	.	.	.	.	.	.	.	.	.	.	.
GCA_016513135.1_PDT000424064.1	14	.	.	.	.	.	.	.	.	.	.	100.00;89.14	.	.	.	.	.	.	.	.	.	.	.	.	.	.	.	.	.	.	.	.	.	.	.	.	82.51;82.51	.	.	.	.	.	.	.	.	.	.	.	.
GCA_016513155.1_PDT000424065.1	13	.	.	.	.	.	.	.	.	.	.	100.00;100.00	.	.	.	.	.	.	.	.	.	.	.	.	.	.	.	.	.	.	.	.	.	.	.	.	82.51;82.51	.	.	.	.	.	.	.	.	.	.	.	.
GCA_016513175.1_PDT000424063.1	15	.	.	.	.	.	.	.	.	.	.	100.00;89.14	.	.	.	.	.	.	.	.	.	.	.	.	.	.	.	.	.	.	.	.	.	.	.	.	82.51;82.51	.	.	.	.	.	.	.	.	.	.	.	.
GCA_016513195.1_PDT000424055.1	12	.	.	.	.	.	.	.	.	.	.	.	.	.	.	.	.	.	.	.	.	.	.	.	.	.	.	.	.	.	.	.	.	.	.	.	.	.	.	99.88;99.88	.	.	.	.	.	.	.	.	100.00;100.00
GCA_016513215.1_PDT000424058.1	13	.	.	.	.	.	.	.	.	.	.	100.00;100.00	.	.	.	.	.	.	.	.	.	.	.	.	.	.	.	.	.	.	.	.	.	.	.	.	82.51;82.51	.	.	99.88;99.88	.	.	.	.	.	.	.	.	100.00;100.00
GCA_016513235.1_PDT000424061.1	19	.	100.00;89.50	.	.	.	.	.	.	.	.	100.00;89.33	.	.	.	.	.	.	.	.	.	.	.	.	.	.	.	.	.	.	.	.	.	.	.	.	.	.	.	98.63;99.88;99.88	.	.	.	.	.	.	.	.	.
GCA_016513255.1_PDT000424060.1	19	.	100.00;89.50	.	.	.	.	.	.	.	.	100.00;89.33	.	.	.	.	.	.	.	.	.	.	.	.	.	.	.	.	.	.	.	.	.	.	.	.	.	.	.	98.63;99.88;99.88	.	.	.	.	.	.	.	.	.
GCA_016513275.1_PDT000424062.1	9	.	.	.	.	.	.	.	.	.	.	.	.	.	.	.	.	.	.	.	.	.	.	.	.	.	.	.	.	.	.	.	100.00;100.00	.	.	.	.	.	.	.	.	.	.	.	.	.	.	.	.
GCA_016513295.1_PDT000424059.1	11	.	.	.	.	.	.	.	.	.	.	.	.	.	.	.	.	.	.	.	.	.	.	.	.	.	.	.	.	.	.	.	.	.	.	.	82.51;82.51	.	.	.	.	.	.	.	.	.	.	.	.
GCA_016513315.1_PDT000424054.1	11	.	.	.	.	.	.	.	.	.	.	.	.	.	.	.	.	.	.	.	.	.	.	.	.	.	.	.	.	.	.	.	.	.	.	.	.	.	.	99.88;99.88	.	.	.	.	.	.	.	.	.
GCA_016513335.1_PDT000424057.1	14	.	.	.	.	.	.	.	.	.	.	.	.	.	.	.	.	.	.	.	.	.	.	.	.	.	.	.	.	.	.	.	.	.	.	.	.	.	.	99.88;99.88	.	.	.	.	.	.	.	.	100.00;100.00
GCA_016513355.1_PDT000424056.1	12	.	.	.	.	.	.	.	.	.	.	.	.	.	.	.	.	.	.	.	.	.	.	.	.	.	.	.	.	.	.	.	.	.	.	.	.	.	.	99.88;99.88	.	.	.	.	.	.	.	.	100.00;100.00
GCA_016513375.1_PDT000424053.1	7	.	.	.	.	.	.	.	.	.	.	.	.	.	.	.	.	.	.	.	.	.	.	.	.	.	.	.	.	.	.	.	.	.	.	.	.	.	.	.	.	.	.	.	.	.	.	.	.
GCA_016513395.1_PDT000424052.1	9	.	.	.	.	.	.	.	.	.	.	.	.	.	.	.	.	.	.	.	.	.	.	.	.	.	.	.	.	.	.	.	100.00;100.00	.	.	.	.	.	.	.	.	.	.	.	.	.	.	.	.
GCA_016513415.1_PDT000424051.1	9	.	.	.	.	.	.	.	.	.	.	.	.	.	.	.	.	.	.	.	.	.	.	.	.	.	.	.	.	.	.	.	100.00;100.00	.	.	.	.	.	.	.	.	.	.	.	.	.	.	.	.
GCA_016513435.1_PDT000424039.1	5	.	.	.	.	.	.	.	.	.	.	.	.	.	.	.	.	.	.	.	.	.	.	.	.	.	.	.	.	.	.	.	.	.	.	.	.	.	.	.	.	.	.	.	.	.	.	.	.
GCA_016513455.1_PDT000424041.1	4	.	.	.	.	.	.	.	.	.	.	.	.	.	.	.	.	.	.	.	.	.	.	.	.	.	.	.	.	.	.	.	.	.	.	.	.	.	.	.	.	.	.	.	.	.	.	.	.
GCA_016513475.1_PDT000424043.1	5	.	.	.	.	.	.	.	.	.	.	.	.	.	.	.	.	.	.	.	.	.	.	.	.	.	.	.	.	.	.	.	.	.	.	.	.	.	.	.	.	.	.	.	.	.	.	.	.
GCA_016513495.1_PDT000424042.1	5	.	.	.	.	.	.	.	.	.	.	.	.	.	.	.	.	.	.	.	.	.	.	.	.	.	.	.	.	.	.	.	.	.	.	.	.	.	.	.	.	.	.	.	.	.	.	.	.
GCA_016513515.1_PDT000424040.1	5	.	.	.	.	.	.	.	.	.	.	.	.	.	.	.	.	.	.	.	.	.	.	.	.	.	.	.	.	.	.	.	.	.	.	.	.	.	.	.	.	.	.	.	.	.	.	.	.
GCA_016513535.1_PDT000424050.1	11	.	.	.	.	.	.	.	.	.	.	.	.	.	.	.	.	.	.	.	.	.	.	.	.	.	.	.	.	.	.	.	.	.	.	.	.	.	.	99.88;99.88	.	.	.	.	.	.	.	.	.
GCA_016513555.1_PDT000424047.1	24	.	90.24;90.24	.	.	.	.	.	100.00;100.00	.	.	.	.	.	.	.	100.00;100.00	.	.	.	.	.	.	.	.	.	.	.	.	.	.	.	.	.	.	.	83.54;83.54	.	.	.	.	.	.	.	.	.	.	.	.
GCA_016513575.1_PDT000424049.1	9	.	.	.	.	.	.	.	.	.	.	.	.	.	.	.	.	.	.	.	.	.	.	.	.	.	.	.	.	.	.	.	100.00;100.00	.	.	.	.	.	.	.	.	.	.	.	.	.	.	.	.
GCA_016513595.1_PDT000424048.1	11	.	.	.	.	.	.	.	.	.	.	.	.	.	.	.	.	.	.	.	.	.	.	.	.	.	.	.	.	.	.	.	.	.	.	.	.	.	.	99.88;99.88	.	.	.	.	.	.	.	.	.
GCA_016513615.1_PDT000424046.1	9	.	.	.	.	.	.	.	.	.	.	.	.	.	.	.	.	.	.	.	.	.	.	.	.	.	.	.	.	.	.	.	100.00;100.00	.	.	.	.	.	.	.	.	.	.	.	.	.	.	.	.
GCA_016513635.1_PDT000424044.1	5	.	.	.	.	.	.	.	.	.	.	.	.	.	.	.	.	.	.	.	.	.	.	.	.	.	.	.	.	.	.	.	.	.	.	.	.	.	.	.	.	.	.	.	.	.	.	.	.
GCA_016513655.1_PDT000424045.1	9	.	.	.	.	.	.	.	.	.	.	.	.	.	.	.	.	.	.	.	.	.	.	.	.	.	.	.	.	.	.	.	100.00;100.00	.	.	.	.	.	.	.	.	.	.	.	.	.	.	.	.
GCA_016513675.1_PDT000424033.1	16	.	.	.	.	.	.	.	.	.	.	.	.	.	.	.	.	.	.	.	.	.	.	.	.	.	.	.	.	.	.	.	.	.	.	.	82.51;82.51	.	.	99.88;99.88	.	.	.	.	.	.	.	.	100.00;100.00
GCA_016513695.1_PDT000424034.1	16	.	.	.	.	.	.	.	.	.	.	.	.	.	.	.	.	.	.	.	.	.	.	.	.	.	.	.	.	.	.	.	.	.	.	.	82.51;82.51	.	.	99.88;99.88	.	.	.	.	.	.	.	.	100.00;100.00
GCA_016513715.1_PDT000424035.1	16	.	.	.	.	.	.	.	.	.	.	.	.	.	.	.	.	.	.	.	.	.	.	.	.	.	.	.	.	.	.	.	.	.	.	.	82.51;82.51	.	.	99.88;99.88	.	.	.	.	.	.	.	.	100.00;100.00
GCA_016513725.1_PDT000424036.1	16	.	.	.	.	.	.	.	.	.	.	.	.	.	.	.	.	.	.	.	.	.	.	.	.	.	.	.	.	.	.	.	.	.	.	.	82.51;82.51	.	.	99.88;99.88	.	.	.	.	.	.	.	.	100.00;100.00
GCA_016513755.1_PDT000424038.1	16	.	.	.	.	.	.	.	.	.	.	.	.	.	.	.	.	.	.	.	.	.	.	.	.	.	.	.	.	.	.	.	.	.	.	.	82.51;82.51	.	.	99.88;99.88	.	.	.	.	.	.	.	.	100.00;100.00
GCA_016513775.1_PDT000424037.1	16	.	.	.	.	.	.	.	.	.	.	.	.	.	.	.	.	.	.	.	.	.	.	.	.	.	.	.	.	.	.	.	.	.	.	.	82.51;82.51	.	.	99.88;99.88	.	.	.	.	.	.	.	.	100.00;100.00
GCA_016513785.1_PDT000424032.1	12	.	.	.	.	.	.	.	.	.	100.00;100.00	.	.	.	.	.	.	.	.	.	.	.	.	.	.	.	.	.	.	.	.	.	.	.	.	.	.	.	.	.	.	.	.	.	.	.	.	.	.
GCA_016513875.1_PDT000424031.1	18	.	.	.	.	.	.	.	.	.	.	.	.	.	.	.	.	.	.	.	.	.	.	.	.	.	.	.	.	.	.	.	.	.	.	.	82.51;82.51	.	.	99.88;99.88	.	.	.	.	.	.	.	.	100.00;100.00
GCA_016513915.1_PDT000173807.3	17	.	.	.	.	.	.	.	.	.	.	100.00;100.00	.	.	.	.	.	.	.	.	.	.	.	.	.	.	.	.	.	.	.	.	.	.	.	.	.	.	.	99.88;99.88	.	.	.	.	.	.	.	.	100.00;100.00
GCA_016513935.1_PDT000173810.3	12	.	.	.	.	.	.	.	.	.	.	.	.	.	.	.	.	.	.	.	.	.	.	.	.	.	.	.	.	.	.	.	100.00;100.00	.	.	.	.	.	.	99.88;99.88	.	.	.	.	.	.	.	.	.
GCA_016513955.1_PDT000173811.3	17	.	100.00;100.00	.	.	.	.	.	.	.	.	.	.	.	.	.	.	.	.	.	.	.	.	.	.	.	.	.	.	.	.	.	.	.	.	.	.	.	.	98.63;99.88	.	.	.	.	.	.	.	.	.
GCA_016513975.1_PDT000173812.3	18	.	.	.	.	.	.	.	.	.	.	88.76;88.95	.	.	.	.	.	.	.	.	.	.	.	.	.	.	98.99	.	.	.	.	.	.	.	.	.	82.51;82.51	.	.	99.88;99.88	.	.	.	.	.	.	.	.	100.00;100.00
GCA_016513995.1_PDT000173808.3	21	.	93.74;89.50	.	.	.	.	.	.	.	.	100.00;88.95	.	.	.	.	.	.	.	.	.	.	.	.	.	.	87.50	.	.	.	.	.	.	.	.	.	82.51;82.51	.	.	99.88;99.88	.	.	.	.	.	.	.	.	100.00;100.00
GCA_016514015.1_PDT000424030.1	18	.	.	.	.	.	.	.	.	.	.	.	.	.	.	.	.	.	.	.	.	.	.	.	.	.	.	.	.	.	.	.	.	.	.	.	82.51;82.51	.	.	99.88;99.88	.	.	.	.	.	.	.	.	100.00;100.00
GCA_016514035.1_PDT000424029.1	13	.	.	.	.	.	.	.	.	.	.	.	.	.	.	.	.	.	.	.	.	.	.	.	.	.	.	.	.	.	.	.	.	.	.	.	.	.	.	99.88;99.88	.	.	.	.	.	.	.	.	100.00;100.00
GCA_016514055.1_PDT000173809.3	17	.	100.00;100.00;100.00	.	.	.	.	.	.	.	.	.	.	.	.	.	.	.	.	.	.	.	.	.	.	.	.	.	.	.	.	.	.	.	.	.	.	.	.	99.88;99.88;99.88	.	.	.	.	.	.	.	.	.
GCA_016514075.1_PDT000424028.1	18	.	.	.	.	.	.	.	.	.	.	.	.	.	.	.	.	.	.	.	.	.	.	.	.	.	.	.	.	.	.	.	.	.	.	.	82.51;82.51	.	.	99.88;99.88	.	.	.	.	.	.	.	.	100.00;100.00
GCA_016514115.1_PDT000173806.3	12	.	.	.	.	.	.	.	.	.	.	.	.	.	.	.	.	.	.	.	.	.	.	.	.	.	.	.	.	.	.	.	100.00;100.00	.	.	.	.	.	.	99.88;99.88	.	.	.	.	.	.	.	.	.
GCA_016514135.1_PDT000173805.3	18	.	100.00;100.00	.	.	.	.	.	.	.	.	.	.	.	.	.	.	.	.	.	.	.	.	.	.	.	.	.	.	.	.	.	.	.	.	.	.	.	.	99.88;99.88	.	.	.	.	.	.	.	.	.
GCA_016514155.1_PDT000173803.3	18	.	100.00;100.00	.	.	.	100.00;100.00	.	.	.	.	.	.	.	.	100.00;100.00	.	.	.	.	.	.	.	.	.	.	.	.	.	.	.	.	.	.	.	.	.	.	.	99.88;99.88	.	.	.	.	.	.	.	.	.
GCA_016514175.1_PDT000173804.3	18	.	100.00;100.00	.	.	.	.	.	.	.	.	.	.	.	.	.	.	.	.	.	.	.	.	.	.	.	.	.	.	.	.	.	.	.	.	.	.	.	.	99.88;99.88	.	.	.	.	.	.	.	.	.
GCA_016514195.1_PDT000173799.3	18	.	.	.	.	.	.	.	.	.	.	100.00;100.00	.	.	.	.	.	.	.	.	.	.	.	.	.	.	.	.	.	.	.	.	.	.	.	.	82.51;82.51	.	.	99.88;99.88;99.88	.	.	.	.	.	.	.	.	100.00;100.00
GCA_016514215.1_PDT000173802.3	17	.	100.00;100.00	.	.	.	.	.	.	.	.	.	.	.	.	.	.	.	.	.	.	.	.	.	.	.	.	.	.	.	.	.	.	.	.	.	.	.	.	99.88;99.88	.	.	.	.	.	.	.	.	.
GCA_016514235.1_PDT000173800.3	18	.	100.00;100.00	.	.	.	.	.	.	.	.	.	.	.	.	.	.	.	.	.	.	.	.	.	.	.	.	.	.	.	.	.	.	.	.	.	.	.	.	99.88;99.88	.	.	.	.	.	.	.	.	.
GCA_016514255.1_PDT000173801.3	16	.	100.00;100.00	.	.	.	.	.	.	.	.	.	.	.	.	.	.	.	.	.	.	.	.	.	.	.	.	.	.	.	.	.	.	.	.	.	.	.	.	99.88;99.88	.	.	.	.	.	.	.	.	.
GCA_016514275.1_PDT000173798.3	18	.	100.00;100.00	.	.	.	.	.	.	.	.	.	.	.	.	.	.	.	.	.	.	.	.	.	.	.	.	.	.	.	.	.	.	.	.	.	.	.	.	99.88;99.88	.	.	.	.	.	.	.	.	.
GCA_016514295.1_PDT000173797.3	20	.	93.74;89.50	.	.	.	.	.	.	.	.	100.00;88.95	.	.	.	.	.	.	.	.	.	.	.	.	.	.	.	.	.	.	.	.	.	.	.	.	80.66;82.51;82.51	.	.	99.88;99.88	.	.	.	.	.	.	.	.	100.00;100.00
GCA_016514315.1_PDT000173796.3	18	.	100.00;100.00	.	.	.	.	.	.	.	.	.	.	.	.	.	.	.	.	.	.	.	.	.	.	.	.	.	.	.	.	.	.	.	.	.	.	.	.	99.88;99.88	.	.	.	.	.	.	.	.	.
GCA_016514335.1_PDT000173793.3	18	.	100.00;100.00	.	.	.	.	.	.	.	.	.	.	.	.	.	.	.	.	.	.	.	.	.	.	.	.	.	.	.	.	.	.	.	.	.	.	.	.	99.88;99.88	.	.	.	.	.	.	.	.	.
GCA_016514355.1_PDT000173795.3	17	.	.	.	.	.	.	.	.	.	.	88.76;88.95	.	.	.	.	.	.	.	.	.	.	.	.	.	.	.	.	.	.	.	.	.	.	.	.	82.51;82.51;82.51	.	.	99.88;99.88	.	.	.	.	.	.	.	.	100.00;100.00
GCA_016514375.1_PDT000173794.3	16	.	.	.	.	.	.	.	.	.	.	100.00;100.00	.	.	.	.	.	.	.	.	.	.	.	.	.	.	.	.	.	.	.	.	.	.	.	.	82.51;82.51	.	.	99.88;99.88	.	.	.	.	.	.	.	.	100.00;100.00
GCA_016514395.1_PDT000173790.3	9	.	.	.	.	.	.	.	.	.	.	.	.	.	.	.	.	.	.	.	.	.	.	.	.	.	.	.	.	.	.	.	100.00;100.00	.	.	.	.	.	.	.	.	.	.	.	.	.	.	.	.
GCA_016514415.1_PDT000173792.3	17	.	100.00;100.00	.	.	.	.	.	.	.	.	.	.	.	.	.	.	.	.	.	.	.	.	.	.	.	.	.	.	.	.	.	.	.	.	.	.	.	.	99.88;99.88	.	.	.	.	.	.	.	.	.
GCA_016514435.1_PDT000173781.3	17	.	100.00;100.00	.	.	.	.	.	.	.	.	.	.	.	.	.	.	.	.	.	.	.	.	.	.	.	.	.	.	.	.	.	.	.	.	.	.	.	.	99.88;99.88	.	.	.	.	.	.	.	.	.
GCA_016514445.1_PDT000173789.3	21	.	93.74;89.50	.	.	.	.	.	.	.	.	100.00;88.95	.	.	.	.	.	.	.	.	.	.	.	.	.	.	87.50	.	.	.	.	.	.	.	.	.	82.51;82.51	.	.	99.88;99.88	.	.	.	.	.	.	.	.	100.00;100.00
GCA_016514475.1_PDT000173791.3	17	.	.	.	.	.	.	.	.	.	.	.	.	.	.	.	.	.	.	.	.	.	.	.	.	.	.	.	.	.	.	.	100.00;100.00	.	.	.	.	.	.	99.88;99.88	.	.	.	.	.	.	.	.	.
GCA_016514495.1_PDT000173787.3	17	.	100.00;90.06	.	.	.	.	.	.	.	.	.	.	.	.	.	.	.	.	.	.	.	.	.	.	.	.	.	.	.	.	.	.	.	.	.	.	.	.	99.88;99.88;99.88;75.12;75.12;75.12	.	.	.	.	.	.	.	.	.
GCA_016514515.1_PDT000173788.3	12	.	.	.	.	.	.	.	.	.	.	.	.	.	.	.	.	.	.	.	.	.	.	.	.	.	.	.	.	.	.	.	100.00;100.00	.	.	.	.	.	.	99.88;99.88	.	.	.	.	.	.	.	.	.
GCA_016514535.1_PDT000173784.3	18	.	.	.	.	.	.	.	.	.	.	100.00;88.95	.	.	.	.	.	.	.	.	.	.	.	.	.	.	87.50	.	.	.	.	.	.	.	.	.	82.51;82.51	.	.	99.88;99.88	.	.	.	.	.	.	.	.	100.00;100.00
GCA_016514555.1_PDT000173783.3	18	.	.	.	.	.	.	.	.	.	.	100.00;88.95	.	.	.	.	.	.	.	.	.	.	.	.	.	.	87.50	.	.	.	.	.	.	.	.	.	82.51;82.51	.	.	99.88;99.88	.	.	.	.	.	.	.	.	100.00;100.00
GCA_016514575.1_PDT000173786.3	18	.	100.00;100.00;100.00	.	.	.	.	.	.	.	.	.	.	.	.	.	.	.	.	.	.	.	.	.	.	.	.	.	.	.	.	.	.	.	.	.	.	.	.	99.88;99.88;99.88	.	.	.	.	.	.	.	.	.
GCA_016514595.1_PDT000173785.3	12	.	.	.	.	.	.	.	.	.	.	.	.	.	.	.	.	.	.	.	.	.	.	.	.	.	.	.	.	.	.	.	100.00;100.00	.	.	.	.	.	.	99.88;99.88	.	.	.	.	.	.	.	.	.
GCA_016514615.1_PDT000173779.3	16	.	.	.	.	.	.	.	.	.	.	100.00;89.14	.	.	.	.	.	.	.	.	.	.	.	.	.	.	.	.	.	.	.	.	.	.	.	.	82.51;82.20	.	.	99.88;99.88	.	.	.	.	.	.	.	.	100.00;100.00
GCA_016514635.1_PDT000173782.3	17	.	100.00;100.00	.	.	.	.	.	.	.	.	.	.	.	.	.	.	.	.	.	.	.	.	.	.	.	.	.	.	.	.	.	.	.	.	.	.	.	.	99.88;99.88;99.88	.	.	.	.	.	.	.	.	.
GCA_016514655.1_PDT000173780.3	17	.	100.00;100.00;100.00	.	.	.	.	.	.	.	.	.	.	.	.	.	.	.	.	.	.	.	.	.	.	.	.	.	.	.	.	.	.	.	.	.	.	.	.	99.88;99.88;99.88	.	.	.	.	.	.	.	.	.
GCA_016514675.1_PDT000173778.3	19	.	.	.	.	.	.	.	.	.	.	.	.	.	.	.	.	.	.	.	.	.	.	.	.	.	.	.	99.27;97.31	.	.	.	100.00;100.00	.	.	.	.	.	.	99.88;99.88	.	.	.	.	.	.	.	.	100.00;100.00
GCA_016514695.1_PDT000173775.3	18	88.96;88.96	100.00;91.53;91.53	.	.	.	.	.	.	.	.	.	.	.	.	.	.	.	.	.	.	.	.	.	.	.	.	.	.	.	.	.	.	.	.	.	.	.	.	99.88;99.88;99.88	.	.	.	.	.	.	.	.	.
GCA_016514715.1_PDT000173777.3	12	.	.	.	.	.	.	.	.	.	.	.	.	.	.	.	.	.	.	.	.	.	.	.	.	.	.	.	.	.	.	.	100.00;100.00	.	.	.	.	.	.	99.88;99.88	.	.	.	.	.	.	.	.	.
GCA_016514735.1_PDT000173776.3	17	.	100.00;100.00	.	.	.	.	.	.	.	.	.	.	.	.	.	.	.	.	.	.	.	.	.	.	.	.	.	.	.	.	.	.	.	.	.	.	.	.	99.88;99.88	.	.	.	.	.	.	.	.	.
GCA_016514755.1_PDT000173774.3	12	.	.	.	.	.	.	.	.	.	.	.	.	.	.	.	.	.	.	.	.	.	.	.	.	.	.	.	.	.	.	.	100.00;100.00	.	.	.	.	.	.	99.88;99.88	.	.	.	.	.	.	.	.	.
GCA_016514775.1_PDT000173773.3	17	.	100.00;100.00	.	.	.	.	.	.	.	.	.	.	.	.	.	.	.	.	.	.	.	.	.	.	.	.	.	.	.	.	.	.	.	.	.	.	.	.	99.88;99.88	.	.	.	.	.	.	.	.	.
GCA_016514795.1_PDT000173772.3	17	.	100.00;100.00	.	.	.	.	.	.	.	.	.	.	.	.	.	.	.	.	.	.	.	.	.	.	.	.	.	.	.	.	.	.	.	.	.	.	.	.	99.88;99.88	.	.	.	.	.	.	.	.	.
GCA_016514815.1_PDT000173769.3	17	.	100.00;100.00	.	.	.	.	.	.	.	.	.	.	.	.	.	.	.	.	.	.	.	.	.	.	.	.	.	.	.	.	.	.	.	.	.	.	.	.	99.88;99.88	.	.	.	.	.	.	.	.	.
GCA_016514835.1_PDT000173771.3	18	82.12	100.00;100.00	.	.	.	.	.	.	.	.	.	.	.	.	.	.	.	.	.	.	.	.	.	.	.	.	.	.	.	.	.	.	.	.	.	.	.	.	99.88;99.88	.	.	.	.	.	.	.	.	.
GCA_016514855.1_PDT000173770.3	16	.	100.00;100.00	.	.	.	.	.	.	.	.	.	.	.	.	.	.	.	.	.	.	.	.	.	.	.	.	.	.	.	.	.	.	.	.	.	.	.	.	99.88;99.88;99.88	.	.	.	.	.	.	.	.	.
GCA_016514875.1_PDT000173762.3	16	.	.	.	.	.	.	.	.	.	.	.	.	.	.	.	.	.	.	.	.	.	.	.	.	.	.	.	.	.	.	.	.	.	.	.	82.51;82.51;82.51	.	.	99.88;99.88	.	.	.	.	.	.	.	.	100.00;100.00
GCA_016514895.1_PDT000173768.3	17	.	100.00;100.00	.	.	.	.	.	.	.	.	.	.	.	.	.	.	.	.	.	.	.	.	.	.	.	.	.	.	.	.	.	.	.	.	.	.	.	.	99.88;99.88	.	.	.	.	.	.	.	.	.
GCA_016514915.1_PDT000173767.3	14	.	.	.	.	.	.	.	.	.	.	.	.	.	.	.	.	.	.	.	.	.	.	.	.	.	.	.	97.19;97.31	.	.	.	.	.	.	.	.	.	.	.	.	.	.	.	.	.	.	.	.
GCA_016514925.1_PDT000173766.3	17	.	100.00;100.00	.	.	.	.	.	.	.	.	.	.	.	.	.	.	.	.	.	.	.	.	.	.	.	.	.	.	.	.	.	.	.	.	.	.	.	.	99.88;99.88	.	.	.	.	.	.	.	.	.
GCA_016514955.1_PDT000173765.3	9	.	.	.	.	.	.	.	.	.	.	.	.	.	.	.	.	.	.	.	.	.	.	.	.	.	.	.	.	.	.	.	100.00;100.00	.	.	.	.	.	.	.	.	.	.	.	.	.	.	.	.
GCA_016514975.1_PDT000173763.3	14	.	.	.	.	.	.	.	.	.	.	.	.	.	.	.	.	.	.	.	.	.	.	.	.	.	.	.	.	.	.	.	100.00;100.00	.	.	.	77.88	.	.	99.88;99.88;99.88	.	.	.	.	.	.	.	.	.
GCA_016514985.1_PDT000173761.3	18	.	100.00;100.00	.	.	.	100.00;100.00	.	.	.	.	.	.	.	.	100.00;100.00	.	.	.	.	.	.	.	.	.	.	.	.	.	.	.	.	.	.	.	.	.	.	.	99.88;99.88	.	.	.	.	.	.	.	.	.
GCA_016515015.1_PDT000173764.3	12	.	.	.	.	.	.	.	.	.	.	.	.	.	.	.	.	.	.	.	.	.	.	.	.	.	.	.	.	.	.	.	100.00;100.00	.	.	.	.	.	.	.	.	.	.	.	.	.	.	.	.
GCA_016515025.1_PDT000173759.3	17	.	100.00;100.00	.	.	.	.	.	.	.	.	.	.	.	.	.	.	.	.	.	.	.	.	.	.	.	.	.	.	.	.	.	.	.	.	.	.	.	.	99.88;99.88	.	.	.	.	.	.	.	.	.
GCA_016515035.1_PDT000173760.3	12	.	.	.	.	.	.	.	.	.	.	.	.	.	.	.	.	.	.	.	.	.	.	.	.	.	.	.	.	.	.	.	.	.	.	.	.	.	.	.	.	.	.	.	.	.	.	.	.
GCA_016515075.1_PDT000173757.3	17	.	100.00;100.00	.	.	.	.	.	.	.	.	.	.	.	.	.	.	.	.	.	.	.	.	.	.	.	.	.	.	.	.	.	.	.	.	.	.	.	.	99.88;99.88	.	.	.	.	.	.	.	.	.
GCA_016515095.1_PDT000173758.3	18	.	100.00;100.00	.	.	.	93.03;93.15	.	.	.	.	.	.	.	.	.	.	.	.	.	.	.	.	.	.	.	.	.	.	.	.	.	.	.	.	.	.	.	.	99.88;99.88	.	.	.	.	.	.	.	.	.
GCA_016515115.1_PDT000173756.3	17	.	100.00;100.00	.	.	.	.	.	.	.	.	.	.	.	.	.	.	.	.	.	.	.	.	.	.	.	.	.	.	.	.	.	.	.	.	.	.	.	.	99.88;99.88	.	.	.	.	.	.	.	.	.
GCA_016515125.1_PDT000173754.3	17	.	100.00;100.00	.	.	.	.	.	.	.	.	.	.	.	.	.	.	.	.	.	.	.	.	.	.	.	.	.	.	.	.	.	.	.	.	.	.	.	.	99.88;99.88;99.88	.	.	.	.	.	.	.	.	.
GCA_016515135.2_PDT000201879.2	7	.	.	.	.	.	.	.	.	.	.	.	.	.	.	.	.	.	.	.	.	.	.	.	.	.	.	.	.	.	.	.	.	.	.	.	.	.	.	99.88;99.88	.	.	.	.	.	.	.	.	.
GCA_016515175.2_PDT000226497.2	7	.	.	.	.	.	.	.	.	.	.	.	.	.	.	.	.	.	.	.	.	.	.	.	.	.	.	.	.	.	.	.	.	.	.	.	.	.	.	99.88;99.88	.	.	.	.	.	.	.	.	.
GCA_016515195.1_PDT000173755.3	17	.	100.00;100.00	.	.	.	.	.	.	.	.	.	.	.	.	.	.	.	.	.	.	.	.	.	.	.	.	.	.	.	.	.	.	.	.	.	.	.	.	99.88;99.88	.	.	.	.	.	.	.	.	.
GCA_016515215.2_PDT000251002.2	7	.	.	.	.	.	.	.	.	.	.	.	.	.	.	.	.	.	.	.	.	.	.	.	.	.	.	.	.	.	.	.	.	.	.	.	.	.	.	99.88;99.88	.	.	.	.	.	.	.	.	.
GCA_016515225.1_PDT000173752.3	14	.	.	.	.	.	.	.	.	.	.	.	.	.	.	.	.	.	.	.	.	.	.	.	.	.	.	.	.	.	.	.	100.00;100.00	.	.	.	.	.	.	.	.	.	.	.	.	.	.	.	.
GCA_016515255.2_PDT000239123.2	3	.	.	.	.	.	.	.	.	.	.	.	.	.	.	.	.	.	.	.	.	.	.	.	.	.	.	.	.	.	.	.	.	.	.	.	.	.	.	.	.	.	.	.	.	.	.	.	.
GCA_016515265.2_PDT000251003.2	7	.	.	.	.	.	.	.	.	.	.	100.00;100.00	.	.	.	.	.	.	.	.	.	.	.	.	.	.	.	.	.	.	.	.	.	.	.	.	82.51;82.51	.	.	.	.	.	.	.	.	.	.	.	.
GCA_016515295.1_PDT000173753.3	11	.	.	.	.	.	.	.	.	.	.	.	.	.	.	.	.	.	.	.	.	.	.	.	.	.	.	.	.	.	.	.	.	.	.	.	.	.	.	99.88;99.88	.	.	.	.	.	.	.	.	.
GCA_016515315.2_PDT000231453.2	7	.	.	.	.	.	.	.	.	.	.	.	.	.	.	.	.	.	.	.	.	.	.	.	.	.	.	.	.	.	.	.	.	.	.	.	.	.	.	99.88;99.88	.	.	.	.	.	.	.	.	.
GCA_016515335.2_PDT000226505.2	7	.	.	.	.	.	.	.	.	.	.	.	.	.	.	.	.	.	.	.	.	.	.	.	.	.	.	.	.	.	.	.	.	.	.	.	.	.	.	99.88;99.88	.	.	.	.	.	.	.	.	.
GCA_016515355.2_PDT000186887.2	9	.	.	.	.	.	.	.	.	.	.	89.33;97.00	.	.	100.00;100.00	.	.	.	.	.	.	.	.	.	.	.	.	.	.	.	.	.	.	.	.	.	.	.	.	99.88;99.88	.	.	.	.	.	.	.	.	.
GCA_016515365.2_PDT000201877.2	7	.	.	.	.	.	.	.	.	.	.	.	.	.	.	.	.	.	.	.	.	.	.	.	.	.	.	.	.	.	.	.	.	.	.	.	.	.	.	99.88;99.88	.	.	.	.	.	.	.	.	.
GCA_016515615.2_PDT000176200.2	15	.	.	.	.	.	.	.	.	.	.	.	.	.	.	.	.	.	.	.	.	.	.	.	.	.	.	.	.	.	.	.	.	.	.	.	82.51;82.51	.	.	99.88;99.88	.	.	.	.	.	.	.	.	100.00;100.00
GCA_016515635.2_PDT000176202.2	5	.	.	.	.	.	.	.	.	.	.	.	.	.	.	.	.	.	.	.	.	.	.	.	.	.	.	.	.	.	.	.	.	.	.	.	.	.	.	.	.	.	.	.	.	.	.	.	.
GCA_016515645.2_PDT000176198.2	12	.	.	.	.	.	.	.	.	.	.	89.33;97.00	.	.	100.00;100.00	.	.	.	.	.	.	.	.	.	.	.	.	.	.	.	.	.	.	.	.	.	.	.	.	99.88;99.88	.	.	.	.	.	.	.	.	100.00;100.00
GCA_016515695.2_PDT000176197.2	11	.	.	.	.	.	.	.	.	.	.	.	.	.	.	.	.	.	.	.	.	.	.	.	.	.	.	.	.	.	.	.	100.00;100.00	.	.	.	82.30;82.30	.	.	99.88;99.88	.	.	.	.	.	.	.	.	.
GCA_016515715.2_PDT000175791.2	3	.	.	.	.	.	.	.	.	.	.	.	.	.	.	.	.	.	.	.	.	.	.	.	.	.	.	.	.	.	.	.	.	.	.	.	.	.	.	.	.	.	.	.	.	.	.	.	.
GCA_016515785.2_PDT000175788.2	10	.	.	.	.	.	.	.	.	.	.	100.00;100.00	.	.	.	.	.	.	.	.	.	.	.	.	.	.	.	.	.	.	.	.	.	.	.	.	82.51;82.51	.	.	99.88;99.88	.	.	.	.	.	.	.	.	.
GCA_016515825.2_PDT000175789.2	10	.	.	.	.	.	.	.	.	.	.	100.00;100.00	.	.	.	.	.	.	.	.	.	.	.	.	.	.	.	.	.	.	.	.	.	.	.	.	82.51;82.51	.	.	99.88;99.88	.	.	.	.	.	.	.	.	.
GCA_016515835.2_PDT000175786.2	12	.	.	.	.	.	.	.	.	.	.	100.00;100.00	.	.	.	.	.	.	.	.	.	.	.	.	.	.	.	.	.	.	.	.	.	.	.	.	82.51;82.51	.	.	99.88;99.88	.	.	.	.	.	.	.	.	100.00;100.00
GCA_016515865.2_PDT000175790.2	11	.	.	.	.	.	.	.	.	.	.	100.00;100.00	.	.	.	.	.	.	.	.	.	.	.	.	.	.	.	.	.	.	.	.	.	.	.	.	82.51;82.51	.	.	99.88;99.88	.	.	.	.	.	.	.	.	.
GCA_016515875.2_PDT000175793.2	7	.	.	.	.	.	.	.	.	.	.	.	.	.	.	.	.	.	.	.	.	.	.	.	.	.	.	.	.	.	.	.	.	.	.	.	.	.	.	.	.	.	.	.	.	.	.	.	.
[truncated: 9,859 more rows]
[truncated: 322 more columns]
